# Supplementary material for: Increased reluctant vesicles underlie synaptic depression by GPR55 in axon terminals of rat cerebellar Purkinje cells
Source: eLife. 2026 Apr 7;14:RP105268. doi: 10.7554/eLife.105268 (PMC13056361; doi:10.7554/eLife.105268)
Supplement: Figure 1—source data 1. [file elife-105268-fig1-data1.xlsx]

## Sheet: 1C
Data related to Figure 1C: normalized amplitude and CV of IPSC
	eIPSC amplitude (%)
Time (min)	Exp #1	#2	#3	#4	#5	#6		N	Average	SEM
-4	111.184	95.6611	104.618	101.235	101.185	98.2878		6	102.029	2.2091
-3	114.414	97.8088	93.1301	104.131	97.1898	88.1827		6	99.1427	3.74146
-2	96.8854	101.912	112.778	99.9377	103.515	84.7042		6	99.9553	3.75472
-1	112.604	101.216	97.1494	106.472	98.0141	92.4459		6	101.317	2.94935
0	100	100	100	100	100	100		6	100	0
1	114.888	90.1474	79.6669	89.5998	66.0419	85.0455		6	87.5649	6.55569
2	86.4219	96.2509	84.3225	86.693	58.9685	90.0881		6	83.7908	5.24939
3	70.8431	87.6761	79.3022	86.2427	57.8167	84.0865		6	77.6612	4.68404
4	57.0093	90.4002	74.1294	84.818	50.6042	73.472		6	71.7389	6.30254
5	61.1298	78.1371	68.6009	85.5431	50.2257	70.7575		6	69.0657	5.08198
Results from paired t-test
(eIPSC amplitude) at -1 vs 5 min
p_two_tail	0.0022565
	CV of eIPSC (%)
Time (min)	Exp #1	#2	#3	#4	#5	#6		N	Average	SEM
-4	124.747	92.4585	120.849	80.5995	115.26	117.168		6	108.514	7.24122
-3	150.311	72.2637	104.15	87.9745	135.545	111.51		6	110.292	11.864
-2	138.298	88.9475	97.9395	87.8991	59.473	175.858		6	108.069	17.0741
-1	108.852	91.9796	112.116	102.274	111.941	104.074		6	105.206	3.11571
0	100	100	100	100	100	100		6	100	0
1	109.01	143.021	111.905	145.586	83.0867	135.91		6	121.42	9.95754
2	130.606	121.504	94.7832	113.025	77.8756	225.588		6	127.23	21.1415
3	135.469	122.666	129.668	123.542	88.908	261.517		6	143.628	24.4924
4	230.193	112.717	115.702	124.395	103.629	222.501		6	151.523	23.8368
5	251.1	131.3	126.806	150.517	120.755	155.624		6	156.017	19.8149
Results from paired t-test
(CV) at -1 vs 5 min
p_two_tail	0.048985

## Sheet: 1I
Data related to Figure 1I: normalized amplitude and CV of IPSC
AM251
	eIPSC amplitude (%)
Time (min)	Exp #1	#2	#3	#4	#5	#6		N	Average	SEM
-4	121.163	122.796	125.895	101.779	77.5395	74.0029		6	103.862	9.54295
-3	104.724	74.6111	123.015	109.558	93.6745	86.4804		6	98.677	7.07159
-2	110.784	94.4629	106.183	89.0793	92.359	93.4867		6	97.7259	3.5319
-1	115.119	71.5188	136.708	105.393	75.7802	110.154		6	102.446	10.1163
0	100	100	100	100	100	100		6	100	0
1	92.8064	103.433	77.6188	83.5064	52.5833	94.6372		6	84.0974	7.29439
2	70.3646	79.6042	58.0578	82.3782	39.1248	83.6316		6	68.8602	7.11691
3	63.0904	58.7644	45.5345	68.842	46.539	42.5821		6	54.2254	4.40838
4	56.9829	62.5695	21.0084	76.4404	34.5844	40.3745		6	48.66	8.29834
5	51.9192	63.9567	15.6348	62.2769	34.7997	28.5468		6	42.8557	7.99
AM281
	eIPSC amplitude (%)
Time (min)	Exp #1	#2	#3	#4	#5			N	Average	SEM
-4	113.959	99.0665	107.229	105.642	101.495			5	105.478	2.569
-3	105.286	114.093	108.379	104.512	94.3156			5	105.317	3.22547
-2	106.924	115.461	105.909	93.7288	100.433			5	104.491	3.60943
-1	94.6757	95.5518	119.018	101.406	91.51			5	100.432	4.91393
0	100	100	100	100	100			5	100	0
1	120.114	96.3278	112.595	106.097	104.795			5	107.986	3.98735
2	113.644	65.9913	91.7003	115.085	96.379			5	96.5598	8.92498
3	118.272	69.4013	113.907	104.068	95.7191			5	100.274	8.65467
4	91.0455	85.7419	98.0669	113.141	95.0583			5	96.6107	4.61999
5	110.777	99.8934	91.2429	96.346	90.9333			5	97.8386	3.64038
LPI
	eIPSC amplitude (%)
Time (min)	Exp #1	#2	#3	#4	#5			N	Average	SEM
-4	81.3878	103.047	112.203	121.869	102.579			5	104.217	6.71043
-3	79.466	86.3728	102.137	123.522	96.879			5	97.6753	7.57604
-2	99.5393	89.2775	95.8237	122.834	85.8475			5	98.6643	6.50144
-1	94.4213	92.6353	89.2561	91.8226	85.2943			5	90.6859	1.58365
0	100	100	100	100	100			5	100	0
1	108.615	78.1726	93.0891	84.1882	52.7837			5	83.3697	9.20592
2	109.979	60.8105	88.6724	61.1627	57.9425			5	75.7134	10.2267
3	88.8471	54.3102	89.9926	63.8453	66.3771			5	72.6745	7.12856
4	63.1012	69.7723	72.2884	48.055	31.7898			5	57.0014	7.58175
5	64.6775	59.6879	68.3453	49.0824	43.9621			5	57.151	4.62302
CID + AM251
	eIPSC amplitude (%)
Time (min)	Exp #1	#2	#3	#4	#5			N	Average	SEM
-4	109.86	97.3689	123.406	112.087	97.459			5	108.036	4.90728
-3	99.9983	102.246	105.181	105.384	124.202			5	107.402	4.31649
-2	83.8945	102.435	94.5105	104.035	118.793			5	100.734	5.75419
-1	111.571	95.3936	89.3831	107.053	99.6769			5	100.616	3.97356
0	100	100	100	100	100			5	100	0
1	96.6903	87.5297	151.109	90.4795	114.463			5	108.054	11.7346
2	103.166	101.605	139.063	108.545	94.7018			5	109.416	7.73399
3	117.813	72.6378	137.657	94.4759	86.1084			5	101.738	11.6026
4	115.193	60.2786	164.825	93.5287	70.155			5	100.796	18.6283
5	105.918	72.8871	162.709	92.6698	75.0934			5	101.856	16.3699
Results from paired t-test
(eIPSC amplitude) at -1 vs 5 min
	AM251	AM281	LPI	CID+AM251
p_two_tail	0.013386	0.73749	0.0011059	0.94931
AM251
	CV of eIPSC (%)
Time (min)	Exp #1	#2	#3	#4	#5	#6		N	Average	SEM
-4	160.781	153.526	69.6894	73.8204	113.511	128.141		6	116.578	15.7997
-3	98.7799	153.708	98.1017	92.8333	108.574	61.0608		6	102.176	12.2507
-2	122.5	124.78	65.0904	121.116	104.88	93.0712		6	105.24	9.47269
-1	113.118	103.148	66.9864	114.138	120.991	67.4657		6	97.6414	9.89533
0	100	100	100	100	100	100		6	100	0
1	120.108	134.211	108.704	120.149	137.259	120.355		6	123.464	4.30333
2	148.632	102.729	114.472	89.4868	123.375	150.744		6	121.573	10.0357
3	116.691	143.253	111.924	121.329	118.106	132.151		6	123.909	4.75464
4	118.528	121.658	131.305	111.209	147.221	271.905		6	150.304	24.8434
5	129.108	134.503	124.857	111.209	195.39	190.689		6	147.626	14.7145
AM281
	CV of eIPSC (%)
Time (min)	Exp #1	#2	#3	#4	#5			N	Average	SEM
-4	157.383	99.4089	73.3484	79.7871	132.755			5	108.536	16.0008
-3	102.206	114.715	128.529	71.2495	121.767			5	107.693	10.099
-2	165.545	74.7956	66.0978	61.1392	105.886			5	94.6928	19.3453
-1	103.178	116.18	106.454	112.645	110.916			5	109.875	2.29195
0	100	100	100	100	100			5	100	0
1	94.0475	147.423	78.619	72.7156	87.1528			5	95.9915	13.3616
2	87.7914	138.281	104.975	107.95	87.9702			5	105.394	9.22418
3	90.3198	128.058	86.0307	90.331	120.059			5	102.96	8.74118
4	124.995	87.2698	133.332	43.8583	124.019			5	102.695	16.7188
5	90.1719	125.921	96.0439	112.594	85.612			5	102.069	7.51124
LPI
	CV of eIPSC (%)
Time (min)	Exp #1	#2	#3	#4	#5			N	Average	SEM
-4	69.6194	97.907	108.886	101.568	91.8396			5	93.9639	6.68281
-3	147.73	103.547	90.9811	90.648	114.385			5	109.458	10.5337
-2	94.2416	121.516	101.691	75.4281	92.6078			5	97.097	7.46747
-1	97.0794	118.349	129.341	78.4183	103.366			5	105.311	8.78119
0	100	100	100	100	100			5	100	0
1	102.034	132.646	94.0197	96.0747	105.947			5	106.144	6.95588
2	155.337	167.059	98.443	75.5272	116.496			5	122.572	17.1537
3	129.861	116.905	123.518	124.886	106.393			5	120.313	4.04793
4	118.155	125.69	146.559	101.567	136.171			5	125.628	7.69422
5	136.811	144.961	153.471	133.582	137.392			5	141.244	3.58126
CID + AM251
	CV of eIPSC (%)
Time (min)	Exp #1	#2	#3	#4	#5			N	Average	SEM
-4	136.002	72.8891	126.552	122.528	126.088			5	116.812	11.205
-3	149.376	89.7424	110.902	129.17	76.3042			5	111.099	13.1501
-2	160.567	73.4545	126.499	120.936	51.148			5	106.521	19.6054
-1	125.249	102.102	108.607	121.367	93.3869			5	110.142	5.92431
0	100	100	100	100	100			5	100	0
1	62.4131	97.6376	137.359	118.188	55.311			5	94.1817	15.7681
2	73.0804	131.302	77.3076	98.8932	63.8952			5	88.8957	12.0575
3	122.331	77.5339	76.5825	148.899	46.3988			5	94.3491	18.2432
4	124.292	49.7622	97.6533	151.288	111.592			5	106.917	16.8003
5	124.453	54.2883	102.745	125.091	113.997			5	104.115	13.1069
Results from paired t-test
(CV) at -1 vs 5 min
	AM251	AM281	LPI	CID+AM251
p_two_tail	0.043072	0.25975	0.0029153	0.62362

## Sheet: Figure 1-figure supplement 1A
Data related to Figure S1A: 20-80% risetime of eIPSCs before and after application of AM251 or LPI
20-80% risetime (ms)
Exp #	before	after AM251
1	0.84	0.83
2	0.87	0.8
3	0.95	0.75
4	0.58	0.58
5	0.83	0.84
6	0.77	0.8
N	6	6
Average	0.81	0.77
SEM	0.05	0.04
Results from paired t-test
(20-80% risetime) before vs after AM251
p_two_tail	0.29631
20-80% risetime (ms)
Exp #	before	after LPI
1	0.36	0.3
2	0.78	0.91
3	0.66	0.45
4	0.77	0.75
5	0.97	0.84
N	5	5
Average	0.71	0.65
SEM	0.1	0.12
Results from paired t-test
(20-80% risetime) before vs after LPI
p_two_tail	0.22232

## Sheet: Figure 1-figure supplement 1C
Data related to Figure S1C: amplitudes of Na+ current before and after application of AM251 or LPI
amplitudes of Na+ current (nA)
Exp #	before	after AM251
1	4.018	3.99
2	2.901	2.646
3	3.864	4.083
4	4.14	4.25
5	2.685	2.593
6	2.202	1.909
N	6	6
Average	3.302	3.245
SEM	0.331	0.401
Results from paired t-test
(amplitudes of Na+ current) before vs after AM251
p_two_tail	0.51994
amplitudes of Na+ current (nA)
Exp #	before	after LPI
1	1.747	1.85
2	2.701	2.51
3	3.315	3.363
4	3.337	3.363
5	3.263	3.38
N	5	5
Average	2.873	2.893
SEM	0.305	0.309
Results from paired t-test
(amplitudes of Na+ current) before vs after LPI
p_two_tail	0.72812
