# Supplementary material for: Increased reluctant vesicles underlie synaptic depression by GPR55 in axon terminals of rat cerebellar Purkinje cells
Source: eLife. 2026 Apr 7;14:RP105268. doi: 10.7554/eLife.105268 (PMC13056361; doi:10.7554/eLife.105268)
Supplement: Figure 2—source data 1. [file elife-105268-fig2-data1.xlsx]

## Sheet: 2B
Data related to Figure 2B: Spatial profiles of T1117 signals
control
GFP(+)	FT1117 (A.U.)
µm	bouton #1	#2	#3	#4	#5	#6	#7	#8	#9	#10	#11	#12	#13	#14	#15	#16	#17	#18	#19	#20	#21	#22	#23	#24	#25	#26	#27	#28	#29	#30	#31	#32	#33	#34	#35	#36	#37	#38	#39	#40	#41	#42	#43	#44	#45	#46	#47	#48	#49
-1.5	0.09691	0.87395	0.02594	0.84965	0.31948	0.02088	-0.01877	-0.06859	0.00689	0.45827	0.24024	0.2875	0.12024	0.35383	0.51614	0.28371	0.56332	0.10543	-0.14425	0.73939	0.03037	0.4909	0.64256	-0.08597	0.20439	-0.02325	0.71457	0.18116	0.13554	0.14487	0.04704	0.23088	0.10247	0.17828	0.36497	0.12472	-0.09002	0.21259	0.46068	0.41551	0.03122	0.01245	0.39882	0.33635	0.46562	-0.13082	0.24245	1.19321	0.08231
-1.4	0.16906	0.98105	0.23544	0.74098	0.42629	0.14853	0.05263	-0.05806	-0.04067	0.30568	0.44315	0.6585	0.10102	0.57653	0.67619	0.46468	0.84855	0.48416	-0.1113	0.44252	0.01421	0.55926	0.58832	-0.13306	0.11053	-0.00906	0.63563	0.19792	0.00848	0.15734	0.31648	0.41981	0.23222	0.26815	0.06804	0.23291	-0.05774	0.33086	0.37398	0.24328	0.01157	0.15789	0.2884	0.37182	0.31106	-0.12558	0.2649	1.6103	0.02346
-1.3	0.23895	0.81889	0.128	0.72328	0.57639	0.08418	0.14322	-0.00109	0.10426	0.33479	0.48453	1.08211	0.12135	0.62709	0.57859	0.5393	0.79807	0.36093	-0.09442	0.1907	0.05597	0.41103	0.53488	-0.0395	0.142	0.06894	0.49534	0.09486	0.08056	0.34707	0.45307	0.18616	0.27876	0.51336	0.75585	0.11484	-0.13114	0.28716	0.27422	0.34313	0.05518	0.11456	0.43046	0.48214	0.30869	-0.07814	0.24872	1.51814	0.07198
-1.2	0.19572	1.21903	0.22764	0.62479	0.75705	0.24683	0.11604	0.02706	0.44603	0.23121	0.32458	1.05697	0.21489	0.47409	0.69205	0.36433	0.73625	0.38025	-0.13349	0.25481	0.01872	0.28606	0.37487	0.02663	0.26809	0.08194	0.90092	0.29569	0.18436	0.49855	0.55811	0.28724	0.11017	0.17607	0.74796	0.16069	-0.0344	0.35562	0.45136	0.44958	0.02792	0.19675	0.7395	0.4933	0.75672	-0.13084	0.24327	1.2312	0.057
-1.1	0.21666	0.86819	0.49214	0.50217	0.58162	0.02467	0.15293	0.01598	0.67723	0.07725	0.52437	0.80084	0.18374	0.78714	0.59302	0.43866	0.86441	0.2169	-0.14444	0.23011	0.15663	0.23143	0.39671	0.25628	0.47259	0.00489	1.14978	1.2108	0.2761	0.32109	0.64916	0.00493	0.02701	0.33074	0.72967	0.20037	0.05667	0.3204	0.39063	0.58245	0.01025	0.2899	0.49412	0.20989	0.64797	-0.119	0.61134	1.21704	-0.07476
-1	0.02941	0.59558	0.55401	0.55059	0.5279	0.19465	0.05272	0.01728	1.10204	0.01783	0.60796	0.61913	0.36437	0.66311	0.88845	0.60217	0.77646	0.40733	-0.10196	0.02944	0.16617	0.28238	0.39668	0.05052	0.48874	0.06595	0.71439	0.51804	0.14809	0.34684	0.89334	0.2259	-0.01961	0.23311	0.91027	0.30049	0.06055	0.54515	0.36164	0.36921	0.03684	0.36939	0.22919	0.04103	0.46966	-0.06881	0.77332	1.23625	0.33586
-0.9	0.07775	0.47317	0.45772	0.5415	0.27737	0.23709	0.09458	0.14196	1.48981	0.07662	0.2249	0.68038	0.36727	0.50338	0.69185	0.60057	1.07662	0.26236	-0.07986	0.00794	0.10252	0.2427	0.22805	0.09172	0.87067	0.38234	0.49381	0.79393	-0.07491	0.38953	0.85036	-0.02503	0.02026	0.47724	0.91753	0.36515	-0.10883	0.69745	0.36058	0.49281	0.07132	0.42597	0.19362	0.27547	0.5327	0.13454	0.63788	1.0521	0.58342
-0.8	0.24557	0.47785	0.2999	0.37766	0.38803	0.16486	0.15432	0.18498	2.15385	0.08304	0.63683	0.58074	0.38792	0.46346	0.83497	0.76193	1.10987	0.32901	-0.12544	0.09908	0.11349	0.13816	0.20709	0.39954	1.01127	0.20784	0.73455	0.968	0.06027	0.44372	0.87113	-0.13066	0.17474	0.18373	0.87732	0.17303	-0.03652	0.44685	0.27105	0.7092	0.03266	0.76418	0.57389	0.15009	0.66379	0.26782	0.83367	1.06087	0.59599
-0.7	0.29346	0.90394	0.60732	0.34818	0.41445	0.07541	0.43749	0.20887	2.35363	0.24347	0.39366	0.47763	0.31096	0.45041	0.7591	1.102	0.98146	0.27846	-0.14385	0.27968	0.21691	0.27945	0.26711	0.30568	1.87482	0.31983	1.14749	1.157	-0.02309	0.58068	1.32765	-0.07988	0.21407	0.1651	0.6324	0.22046	0.04898	0.18295	0.37818	0.64161	0.09507	0.52354	0.55342	0.25583	0.51764	0.3561	0.76728	0.86145	0.80841
-0.6	0.32933	0.93329	0.29687	0.31048	0.34431	0.30559	0.36232	0.17873	1.89745	0.31428	0.40068	0.43675	0.3619	0.55247	0.59344	1.14019	0.98774	0.3054	-0.02597	0.45189	0.31481	0.56047	0.48656	0.40274	2.07793	0.28756	1.38406	1.05069	0.14776	0.80722	1.59759	-0.03766	0.32224	0.32886	0.55071	0.13342	0.00631	0.43923	0.4656	0.61739	0.22911	0.63926	0.74291	0.60928	0.36272	0.62507	1.07201	0.86815	1.01038
-0.5	0.50826	0.65048	0.34963	0.2562	0.37446	0.25047	0.37383	0.16822	2.01941	0.24541	0.28703	0.33485	0.48607	0.87134	0.66676	1.21389	1.1975	0.42744	0.04052	0.65251	0.26768	0.55253	0.55142	0.6778	2.44826	0.28863	0.97536	0.93126	0.19646	0.58493	1.90078	0.01779	0.20933	0.37874	0.76159	0.19133	0.10356	0.46343	0.32293	0.67087	0.25159	0.64965	0.84447	0.22186	0.52343	1.21564	1.42808	0.66966	1.54547
-0.4	0.9222	0.81848	0.64152	0.25378	0.46135	0.14498	0.39811	0.18052	2.51587	0.45943	0.59529	0.50867	0.43207	0.94147	0.56335	1.4802	1.33343	0.32562	0.20451	0.77488	0.2627	0.42168	0.77508	0.49773	2.16563	0.5465	0.98496	1.26597	0.28963	0.65689	1.35128	0.08722	0.2266	0.38978	0.69151	0.38882	0.28678	0.47236	0.58035	0.26077	0.02675	0.85574	0.65634	0.51284	0.68901	1.44386	1.26204	0.49953	1.94358
-0.3	1.29559	0.91687	0.28918	0.46569	0.5776	0.33251	0.58528	0.41009	2.15413	0.6024	1.40453	0.9387	0.47872	1.25736	0.96624	1.53676	1.31744	0.48632	0.18865	1.24017	0.2826	0.85738	0.8704	0.53371	1.68628	0.64418	0.96516	0.94262	0.66972	0.48574	1.82822	0.55018	0.52464	0.51282	0.71275	0.15681	0.57877	0.66422	0.61729	0.50442	0.3233	0.81633	0.57341	0.62647	0.80111	0.95242	1.358	1.16111	2.0467
-0.2	1.63081	1.10017	0.14786	0.78312	0.97239	0.16969	0.64849	0.7515	2.24212	0.7977	2.08288	1.20399	0.57384	1.41155	0.83693	1.49145	1.12168	0.6016	0.28336	1.40022	0.40681	1.23822	1.32342	0.75512	2.6532	0.68347	0.98239	1.16719	0.63303	0.49709	1.94739	0.65335	0.46024	0.59366	0.86894	0.48337	0.40492	1.06088	0.69573	0.81758	0.55139	0.77582	0.51218	0.72238	0.90942	1.3098	1.38491	1.24441	1.77503
-0.1	1.69702	1.59085	0.29093	0.45274	0.6309	0.15789	0.52101	0.72975	2.34918	0.81278	1.71668	0.9352	1.00337	1.07521	0.97226	1.60549	0.70257	0.7343	0.28387	1.19278	0.59017	1.35047	0.85529	1.08053	2.42313	0.69433	1.22095	1.17425	0.73894	0.67407	1.41236	1.07679	0.55999	0.61189	0.72531	0.52976	0.76704	0.95625	0.57455	0.84034	0.45496	1.17419	1.04805	0.53774	0.9155	1.22632	1.07824	1.58853	1.51691
0	2.25005	1.98244	0.29104	0.6159	0.26569	0.3152	0.63926	1.19263	1.83924	1.01945	1.71717	1.1113	1.35803	1.25435	1.16963	1.85252	0.70559	0.73781	0.16512	1.05696	0.24872	1.37578	0.69116	1.13075	1.7729	0.86791	0.75982	0.94339	0.89026	0.78102	1.04755	1.06205	0.67498	0.46719	0.86504	0.47025	0.96888	0.85518	0.46371	0.66185	0.4254	0.80543	0.95329	0.70331	0.85225	1.77983	0.99292	1.16278	1.7071
0.1	1.98401	2.06459	0.22971	0.88663	0.58178	0.36529	0.50991	1.2597	1.69817	1.27887	1.98348	1.37639	1.62474	1.473	1.28979	2.0295	0.95535	0.98309	0.36682	1.4543	0.25372	1.49881	0.72557	1.08827	1.72525	1.25153	0.74026	0.70677	1.06917	0.3442	0.9945	1.94023	0.79202	0.66481	0.66903	0.70438	0.85498	0.82747	0.47555	0.2115	0.40979	0.6415	0.56324	1.00773	1.62288	1.32535	0.7837	1.1109	1.15716
0.2	2.1824	1.98715	0.18576	0.97126	0.53638	0.25204	0.49511	1.27879	1.83988	1.41953	1.83365	1.58477	1.57751	1.44038	1.3327	1.77543	0.85538	1.10306	0.42312	1.20282	0.28936	1.94735	0.6992	0.73477	1.46431	1.43638	1.09119	0.84762	1.01762	0.29165	0.90325	1.55241	0.65514	0.57836	0.85646	1.41451	1.30666	0.59602	0.60337	0.37103	0.29141	0.76488	0.45076	0.83265	2.0434	0.86186	0.79925	0.76343	0.81898
0.3	2.45237	2.35625	0.24537	1.01707	0.75326	0.28151	0.51273	1.40873	1.82151	1.76558	2.12528	1.86237	1.7498	1.14056	1.33639	0.98247	0.83877	0.68469	0.4444	1.24094	0.37176	1.56845	0.51745	0.77972	1.15918	1.28758	0.83418	1.01809	0.75658	0.55529	0.86238	1.98041	0.96971	0.82815	1.06916	1.60599	1.3005	0.23823	0.82997	0.19782	0.40746	0.69593	0.68791	0.97542	2.10847	0.90449	0.89896	0.80466	0.43562
0.4	2.48113	2.65159	0.30025	0.88635	0.88269	0.50554	0.58497	1.38376	1.37502	1.48581	2.29281	2.22814	2.21997	0.84609	1.24889	0.83577	0.84442	0.30694	0.30414	0.90179	0.28221	1.38611	0.44257	0.98498	0.79637	1.3164	0.97497	0.61105	0.65103	0.79025	0.60568	1.84421	0.51411	0.78142	1.61474	1.33765	1.41716	0.08021	0.43742	0.53715	0.67323	0.62074	0.66167	1.23273	2.64006	0.82077	0.59387	0.80463	0.49493
0.5	3.00769	2.61876	0.06532	1.28282	0.9586	0.54693	0.64537	1.86285	1.34519	1.70665	2.7603	2.32448	2.24658	0.70783	1.57731	0.62424	0.86884	0.40937	0.62266	0.66323	0.26302	1.31209	0.86793	0.86728	0.3204	1.06346	1.039	0.48549	0.75086	0.60763	0.52174	1.2234	0.38385	0.81124	1.29813	1.20886	1.22918	0.07416	0.42069	0.52655	0.85421	0.6841	0.54709	1.08913	1.90764	0.38305	0.47175	0.51231	0.52225
0.6	2.36509	2.42595	-0.05973	1.19254	1.00385	0.46739	0.43082	1.51083	1.10659	1.97607	2.09866	2.36188	1.96448	0.46233	1.63341	0.36466	0.55712	0.13021	0.81689	0.55174	0.33023	1.173	0.92971	0.52122	0.26525	0.50565	0.92916	0.80448	0.81299	0.37466	0.41037	1.10643	0.4424	0.61867	0.86833	1.25353	1.24251	0.18505	0.28011	0.5537	0.56573	0.32066	0.4715	0.83997	1.61151	0.35887	0.41463	0.50514	0.5894
0.7	1.93195	2.23726	0.0524	0.68274	1.03587	0.38643	0.53407	1.1686	1.09761	1.5715	1.93561	2.58222	1.58636	0.70443	1.58528	0.40753	0.2846	0.13177	0.59337	0.27463	0.3507	1.01076	0.58186	0.63175	0.07349	0.55568	1.18124	0.62528	0.56136	0.32412	0.13271	0.95116	0.5905	0.37775	0.7269	1.19634	1.10487	0.12364	0.30338	0.28623	0.632	0.4151	0.42032	1.05327	1.66106	0.65089	0.23704	0.60331	0.64468
0.8	1.57081	1.28329	0.08881	0.64066	1.06059	0.41325	0.72507	1.00607	1.12199	1.53495	1.7948	2.90422	1.46498	0.74619	1.85887	0.36792	0.35317	0.12435	0.66228	0.13778	0.40992	0.7374	0.6198	0.40665	-0.04502	0.99948	0.89477	0.51472	0.39478	0.24256	0.42476	1.88577	0.31847	0.05369	1.04125	0.73177	1.1199	-0.02649	0.30882	0.90572	0.72783	0.88581	0.41627	0.57204	1.3244	0.66963	0.34383	0.30652	0.65229
0.9	1.79056	0.82202	-0.08699	0.61344	1.11894	0.4546	0.71364	1.19758	1.11002	1.77626	1.48552	2.94121	1.24439	0.52276	1.24609	0.29956	0.31945	-0.0351	0.29624	-0.01696	0.53678	0.54289	0.56212	0.31729	0.22136	0.52837	1.10824	0.48605	0.58216	0.08936	0.46012	1.1503	0.52798	-0.0397	0.41449	0.62788	1.19681	0.00944	0.07706	0.20728	1.17554	0.60444	0.60009	0.60514	0.87691	0.86067	0.29247	0.28878	0.51744
1	1.21274	0.67997	-0.00596	0.42901	0.89358	0.3064	0.62253	1.18183	0.76761	1.75514	1.28909	2.80626	1.04629	0.50492	1.34181	0.26918	0.37881	-0.04885	0.35734	-0.06485	0.47059	0.57498	0.51709	0.15118	0.09349	0.67365	1.40995	0.32272	0.6991	0.0883	0.35677	0.80811	0.56352	-0.12114	0.51623	0.56771	0.93146	0.04978	0.10903	0.77694	1.53353	0.61852	0.65368	0.55544	0.8681	0.609	0.30383	0.20447	0.6496
1.1	1.30347	0.61942	-0.03864	0.42233	0.89897	0.28973	0.51779	0.84307	0.61859	1.89128	1.04185	2.1629	0.83445	0.4747	1.39192	0.43386	0.22048	-0.0313	0.37876	-0.03155	0.50786	0.49957	0.79646	0.42318	-0.0942	0.92237	1.44019	0.44116	0.50531	0.13566	0.41677	0.99766	0.59153	-0.05593	0.53365	0.57147	0.73996	0.0069	0.03037	0.14431	1.13995	0.45049	0.95277	0.58792	0.87486	1.48334	0.21759	0.13442	0.59381
1.2	0.60827	0.56806	-0.04266	0.40005	0.9913	0.3459	0.76442	0.81496	0.57665	1.7758	0.85398	2.04481	1.17283	0.70208	0.97841	0.34654	0.29675	0.1733	0.46832	-0.02686	0.5105	0.43039	0.60173	0.28803	0.13997	0.84264	0.99073	0.71596	0.60921	0.12409	0.36768	1.12581	0.80227	0.08167	0.45004	0.37818	0.59513	0.02719	0.22376	0.46929	0.99632	0.36039	0.98116	0.48957	0.78271	1.32841	0.21093	-0.01904	0.46668
1.3	0.23604	0.4737	0.04383	0.24426	0.8829	0.68877	0.63862	0.86977	0.8342	1.98674	0.63593	1.48275	1.07769	0.54343	1.18481	0.22021	0.1766	0.07687	0.38465	-0.04843	0.40851	0.42105	0.68163	0.296	0.09365	0.49409	0.60414	0.34644	0.3521	0.09274	0.53024	0.69314	0.9295	-0.00896	0.31717	0.02597	0.58319	-0.06381	0.02078	0.52685	0.88985	0.25473	0.83508	0.35169	0.95074	1.2748	0.42357	0.02818	0.68396
1.4	0.15217	0.50636	-0.00791	0.17534	0.90439	0.47683	0.4811	0.68631	0.65628	1.92506	0.55822	1.41231	0.99462	0.54128	0.9186	0.35381	0.19745	0.18832	0.37175	-0.02946	0.66491	0.48731	0.5795	0.43106	0.07107	0.25059	0.1067	0.2954	0.22603	0.02001	0.34234	1.43384	0.67269	-0.09684	0.11375	-0.0134	0.22993	-0.06243	0.14283	0.23785	0.89877	0.56809	0.82314	0.23838	0.88264	1.12264	0.39693	-0.05995	1.00285
1.5	0.01793	0.69578	0.02002	0.02916	0.65912	0.4108	0.38983	0.60249	0.60781	1.80967	0.23496	0.93659	0.78988	0.37497	1.3628	0.31603	0.13201	0.50494	0.15565	0.05203	0.56862	0.33712	0.928	0.34934	0.0349	0.51803	-0.05702	0.42473	-0.02708	0.04847	0.68648	0.81603	0.52795	0.04642	0.1403	0.05675	-0.02474	0.02097	0.07807	0.07718	1.14774	0.3848	0.59162	0.42672	0.37984	0.68161	0.2019	0.00324	0.63896
GPR55 KD
GFP(+)	FT1117 (A.U.)
µm	bouton #1	#2	#3	#4	#5	#6	#7	#8	#9	#10	#11	#12	#13	#14	#15	#16	#17	#18	#19	#20	#21	#22	#23	#24	#25	#26	#27	#28	#29	#30	#31	#32	#33	#34	#35	#36	#37	#38	#39	#40	#41	#42	#43	#44	#45	#46	#47	#48	#49
-1.5	0.26212	0.50869	0.31846	0.16547	0.15793	0.51556	0.37321	0.33774	0.6352	0.45576	0.44038	0.56022	0.17984	0.02878	0.12182	0.37831	0.13871	0.43993	0.54529	0.25788	0.17114	0.56902	0.26383	0.6601	0.6087	0.16874	0.29495	0.0666	0.03763	0.29726	0.00979	0.10468	0.33086	0.23565	0.24472	0.03158	0.06371	0.5355	0.43337	0.44024	0.39609	0.22325	0.81071	0.53314	0.14122	0.13078	0.57943	0.07069	0.18006
-1.4	0.28186	0.38538	0.59704	0.60053	0.29246	0.4141	0.35634	0.32701	1.16814	0.23161	0.67733	0.65061	0.27612	0.47283	0.10479	0.24502	0.24435	0.42085	0.62204	0.30062	0.21986	0.33616	0.43329	0.67064	0.54855	0.21972	0.21021	0.02528	0.28676	0.24799	0.16856	0.48434	0.50375	0.53061	0.0727	0.02146	0.11088	0.25024	0.38208	0.40604	0.04507	0.24816	0.54841	0.52802	0.16017	0.2111	0.35086	0.08914	0.1099
-1.3	0.28807	0.26139	0.08093	0.14686	0.26071	0.36017	0.15899	0.22656	0.8902	0.2604	0.33717	0.4114	0.13636	0.26873	0.09455	0.17615	0.19447	0.24147	0.28935	0.34896	0.15305	0.14563	0.38026	0.46108	0.43973	0.22069	0.12821	0.0666	0.25873	0.17553	0.38202	0.20496	0.21186	0.35314	0.01459	0.04445	0.10153	0.46229	0.49703	0.39237	0.39609	0.47959	0.41531	0.19978	0.14122	0.28948	0.73969	0.21267	0.38263
-1.2	0.41223	0.14846	0.4941	0.28176	0.31471	0.30833	0.13729	0.37333	0.57005	0.39519	0.25914	0.47616	0.07099	0.18108	0.06349	0.17797	0.22602	0.61077	0.08181	0.25788	0.18661	0.31499	0.5613	0.61068	0.39978	0.17209	0.0546	0.02528	0.19188	0.33229	0.02567	0.2053	0.33086	0.26822	0.1357	0.16815	0.19544	0.64123	0.43337	0.56617	0.24311	0.42081	0.43909	0.17733	0.14122	0.37225	0.66494	0.2016	0.75073
-1.1	0.46237	0.20386	0.6216	0.56545	0.41214	0.2493	0.1825	0.2453	0.39326	0.41948	0.5122	0.3336	0.11009	0.09184	0.32258	0.26167	0.32062	0.38091	0.5855	0.30062	0.26324	0.0292	0.21884	0.59102	0.41879	0.44686	0.08005	0.02	0.08489	0.70793	0.00979	0.10468	0.50375	0.06032	0.20251	0.23048	0.12652	0.85125	0.38208	0.52404	0.06568	0.22325	0.22669	0.53314	0.16017	0.59357	0.75568	0.18778	0.677
-1	0.35346	0.31439	0.47253	0.08246	0.86711	0.26477	0.18985	0.23987	0.41053	0.55264	0.3356	0.41512	0.31652	0.15474	0.23581	0.27691	0.28163	0.33268	0.61183	0.34896	0.36913	0.05566	0.29602	0.71615	0.20831	0.16874	0.12007	0.02567	0.12953	0.63161	0.16856	0.48434	0.21186	0.15698	0.08524	0.14484	0.21365	0.7837	0.49703	0.44024	0.04507	0.24816	0.11618	0.52802	0.14122	0.12723	0.36339	0.21045	0.47601
-0.9	0.31796	0.44282	0.3915	0.31251	0.6713	0.57422	0.18562	0.15336	0.49053	0.66418	0.06743	0.38063	0.24523	0.39356	0.17539	0.20064	0.31319	0.23232	0.41307	0.25472	0.04019	0.38555	0.32403	0.72757	0.61967	0.21972	0.1399	0.11048	0.16894	0.46374	0.38202	0.20496	0.26732	0.20231	0.18276	0.38899	0.19175	0.59583	0.24163	0.40604	0.39609	0.47959	0.18611	0.19978	0.16017	0.51352	0.23246	0.35536	0.35948
-0.8	0.48645	0.46453	0.37707	0.21986	0.25551	0.41117	0.56692	0.2465	0.70706	0.40796	0.15048	0.30366	0.45044	0.46282	0.28225	0.13144	0.26075	0.22579	0.67632	0.40258	0.15033	0.38732	0.15202	0.62977	0.68251	0.22069	0.31267	0.08635	0.03763	0.64659	0.02567	0.2053	0.15565	0.24343	0.25892	0.33182	0.10564	0.83345	0.16834	0.39237	0.24311	0.42081	0.45351	0.17733	0.07913	0.34832	0.42833	0.22354	0.47048
-0.7	0.44018	0.29986	0.36877	0.07468	0.5987	0.36012	0.70773	0.48966	0.35774	0.34947	0.04607	0.50218	0.57529	0.21907	0.28168	0.20368	0.19863	0.28088	0.44088	0.50282	0.33819	0.2797	0.35512	0.61972	0.53625	0.17209	0.41138	0.00254	0.28676	0.65249	0.69604	0.45354	0.423	0.27021	0.22114	0.44022	0.10831	1.03772	0.18571	0.57014	0.06568	0.34439	0.21872	0.21799	0.23196	0.48585	0.76332	0.21322	0.47239
-0.6	0.21568	0.28967	0.48472	0.08759	0.69826	0.3148	0.43976	0.62767	0.09599	0.31536	0.06235	0.21393	0.52887	0.66168	0.1981	0.4748	0.23273	0.32895	0.31287	0.33842	0.16246	0.61842	0.29536	0.53065	0.63143	0.44686	0.36085	0.08957	0.25873	0.49914	0.65723	0.46269	0.2605	0.12345	0.26577	0.3525	0.33233	0.12975	0.56887	0.74207	0.22352	0.75151	0.16856	0.30386	0.16925	0.56711	0.45319	0.2301	0.40022
-0.5	0.28434	0.43604	0.54378	0.49847	0.90603	0.16066	0.52473	0.73167	0.2302	0.49816	0.03227	0.17504	0.41262	0.52162	0.24754	0.16722	0.19597	0.47974	0.48888	0.28358	0.37596	0.39084	0.3216	0.54384	1.05829	0.63465	0.26559	0.1227	0.19188	0.80076	0.3044	0.61776	0.59453	0.1691	0.6149	0.34498	0.18885	0.11736	0.67761	1.03564	0.46057	0.99651	0.49714	0.11541	0.28245	0.48768	0.74152	0.18947	0.40665
-0.4	0.37603	0.38101	0.74668	0.48134	1.0481	0.04728	0.88442	0.59575	0.35036	0.36505	0.1089	0.24949	0.39257	0.62515	0.06681	0.37709	0.20917	0.40831	0.86249	0.21413	0.13292	0.14386	0.19988	0.61057	1.09814	0.4084	0.19432	0.28778	0.08489	1.05695	0.35909	0.80605	0.65651	0.32424	0.57174	0.51081	0.29913	0.28956	0.86238	0.43182	0.44302	0.7259	0.7243	0.64323	0.42326	0.39349	0.62105	0.12185	0.27896
-0.3	0.30933	0.41185	0.55103	0.4392	0.88159	0.21588	0.6083	0.6622	0.27377	0.33912	-0.01284	0.2317	0.1896	0.29812	0.07405	0.61803	0.41285	0.42885	0.58932	0.53457	0.50606	0.47023	0.22149	0.79761	1.0579	0.85464	0.35846	0.12854	0.12953	1.34998	0.13681	1.80239	0.36984	0.37929	0.43046	0.40233	0.25893	0.18239	0.28735	0.89659	0.4456	0.49208	0.61724	0.96476	0.63823	0.46409	1.03488	0.17742	0.62099
-0.2	0.51707	0.31786	0.87145	0.35895	0.74302	0.40719	0.24077	0.65814	0.2714	0.36045	0.28823	0.30519	0.42083	0.20361	0.19503	0.7279	0.47944	0.51273	0.2215	0.53346	0.05303	1.0471	0.12843	0.81529	0.91972	1.16309	0.49958	0.21584	0.16894	2.04471	0.67134	1.43141	0.72426	0.3326	0.37933	0.37156	0.33886	0.17065	0.7168	0.71528	0.63184	0.80086	0.70677	0.57235	0.73039	0.6644	0.87152	0.08819	0.73544
-0.1	0.45217	0.40399	0.73198	0.73765	0.42532	0.12524	0.42737	0.92589	0.35701	0.67482	0.43649	0.47926	0.78716	0.25403	0.13809	1.08643	0.52096	0.3284	1.13428	0.55869	0.02499	0.99594	0.6967	0.86768	1.16333	1.06051	0.14739	0.18958	0.21438	1.82652	1.55341	1.51254	0.47791	0.61586	0.53329	0.59078	0.64041	0.19709	0.61944	1.2685	0.94434	0.93773	0.82686	0.66909	0.85933	0.80876	0.33346	0.34282	0.64681
0	0.43965	0.53637	0.86976	0.67333	0.28231	0.14915	0.31836	0.83351	0.52291	1.03058	0.47713	0.27095	0.44383	0.67817	0.07856	1.04278	0.63461	0.31797	1.16051	0.54587	0.47172	0.82659	0.15676	1.3134	0.85685	1.26277	0.26033	0.0094	0.45743	0.91303	0.77543	1.53178	0.56426	0.70693	0.53476	0.31838	0.46586	0.48477	0.51689	1.16185	0.57341	1.20363	1.06501	0.80197	0.62105	0.14711	0.56296	0.53241	0.84944
0.1	0.30109	0.5244	1.15953	0.43324	0.5224	0.55846	0.23982	0.48321	0.23593	1.04148	0.82974	0.13668	0.28104	0.36985	0.15548	0.82431	0.31182	0.23422	0.82517	0.5527	0.44381	0.58666	0.10329	1.58166	1.27733	1.74182	0.11964	0.08318	0.58225	1.1861	1.27115	1.20991	0.67408	0.53007	0.32054	0.34749	0.67146	0.33924	0.40491	1.48681	0.8944	1.12132	1.36798	1.00343	0.98069	0.25799	0.26133	0.1493	1.43358
0.2	0.32363	0.61762	1.55116	0.5434	0.37432	0.72913	0.15623	0.27777	0.66992	1.04859	0.75938	0.20911	0.74534	0.64006	0.17149	1.20263	0.62139	0.5464	0.68176	0.44678	0.16503	0.68369	0.06878	1.19573	0.48761	1.15524	0.3233	0.16451	0.36664	0.91202	0.99418	0.95646	0.42808	0.43838	0.2835	0.47884	0.21031	0.36631	0.39856	1.40827	0.73721	1.04217	1.30725	0.47049	1.07908	0.41645	0.38794	0.22858	1.35507
0.3	0.38122	0.4381	1.14558	1.05299	0.39348	0.37509	0.27742	0.42243	0.54298	0.2794	0.96815	0.28068	0.51358	0.5672	0.16402	0.85372	0.25332	0.73397	1.06586	0.49465	0.72345	0.67663	0.05478	1.07356	0.25737	0.51786	0.44344	0.19432	0.11509	0.73881	0.91126	0.61233	0.25724	0.55968	0.31671	0.53969	0.17642	0.85524	0.44165	0.74379	0.74034	0.86854	1.0449	0.48195	0.80157	0.16244	0.79003	0.36042	0.63519
0.4	0.43126	0.62915	0.86427	1.003	0.43849	0.75431	0.24812	0.39128	0.62175	0.47055	0.66481	0.51376	0.35463	0.81155	0.13946	0.37737	0.34066	0.61025	0.71168	0.41327	0.36284	0.21972	0.0862	1.16629	0.70279	1.05619	0.21141	0.08706	0.05134	0.66905	0.85128	0.6979	0.28768	0.21982	0.64305	0.18916	0.31181	0.43977	0.66202	0.63975	1.02846	0.53269	0.81071	0.54899	0.44165	0.4362	0.49419	0.20301	0.47132
0.5	0.64565	0.40763	0.51465	0.54474	0.25259	0.74112	0.10979	0.4398	0.48098	0.60386	0.68937	0.25902	0.27687	0.71685	0.11859	0.27923	0.32534	0.21421	0.50571	0.35535	0.11763	0.09447	0.14122	1.15987	0.94473	0.61348	0.11955	0.06448	0.22171	0.54645	0.55844	0.93062	0.39495	0.35549	0.72296	0.06213	0.24348	0.37604	0.61651	0.85585	0.54324	0.42927	0.54841	0.55007	0.28588	0.60487	0.14697	0.32246	0.18889
0.6	0.93218	0.64701	0.63014	0.29525	0.28827	1.05806	0.07178	0.67222	0.59523	0.31807	0.5686	0.39078	0.21905	0.31144	0.15357	0.28967	0.29855	0.51116	0.60631	0.4668	0.46412	0.14386	0.14486	1.15754	0.54156	0.9372	0.12285	0.10441	0.20861	0.74215	0.78601	0.98007	0.54078	0.37214	0.53994	0.11035	0.23338	0.35864	0.69832	0.91255	0.41591	0.60603	0.41531	0.23842	0.46582	0.66297	0.31608	0.33557	0.54706
0.7	0.63052	0.39482	0.44865	0.25831	0.41181	1.22925	0.07041	0.52902	0.52619	0.22748	0.51635	0.23809	0.36031	0.48174	0.10263	0.24411	0.19341	0.33838	0.35571	0.40195	0.42531	0.47023	0.10086	1.72296	0.47255	0.77119	0.04596	0.16151	0.23781	0.66452	0.23207	0.78236	0.5526	0.56982	0.55371	0.22466	0.03155	0.44751	0.50463	0.75053	0.2071	0.40161	0.81071	0.23665	0.35851	0.57872	0.1175	0.27999	0.72649
0.8	0.98479	0.97373	0.72667	0.43162	0.40635	1.07205	0.02127	0.47688	0.4077	0.24128	0.11948	0.3685	0.34582	0.22105	0.05132	0.05157	0.35494	0.17072	0.46494	0.26179	0.22578	1.0471	0.09414	1.29781	0.52597	0.96992	0.02271	0.14436	0.1507	0.28957	0.21619	0.4439	0.5276	0.18311	0.75883	0.39331	0.08494	0.34409	0.58667	0.51987	0.41951	0.49454	0.54841	0.25683	0.65359	0.50675	0.56296	0.37842	0.51457
0.9	0.67917	0.66835	0.38455	0.76253	0.1335	0.76772	0.06982	0.50726	0.57022	0.02104	0.06253	0.22637	0.2017	0.36718	0.06291	0.25891	0.4467	0.24711	0.60631	0.23409	0.35475	0.99594	0.22369	0.56051	0.42219	0.60572	0.06112	0.12732	0.32292	0.12134	0.10858	0.27494	0.51252	0.40234	0.72445	0.50022	0.08669	0.37137	0.58691	0.62575	0.43439	0.34653	0.41531	0.33465	0.79718	0.44446	0.26133	0.45363	0.20256
1	0.45295	0.43483	0.72492	0.39774	0.15044	0.51819	0.06757	0.48712	1.10027	-0.03762	-0.0104	0.22169	0.23088	0.66437	-0.02161	0.50437	0.22675	0.50612	0.35571	0.15305	0.24668	0.82659	0.3194	0.66623	0.70279	0.50763	0.00773	0.07859	0.33897	0.1252	0.50375	0.62248	0.3854	0.72559	0.59528	0.22466	0.14822	0.51199	0.6793	0.59099	0.42316	0.23702	0.81071	0.02763	0.49713	0.26649	0.38794	0.35517	0.47132
1.1	0.3525	0.36996	0.3982	0.33835	0.14289	0.36311	0.08265	0.24161	0.88284	0.01553	0.10694	0.1746	0.3196	0.44824	0.01758	0.24537	0.2586	0.45719	0.46494	0.49245	0.29983	0.58666	0.33858	0.38188	0.94473	0.63182	0.02004	0.08463	0.15252	0.03649	0.28852	0.94985	0.23411	0.68563	0.52144	0.39331	0.14443	0.51376	0.59192	0.56617	0.62445	0.51032	0.54841	0.03295	0.75459	0.56527	0.79003	0.3129	0.18889
1.2	0.3601	0.4514	0.3041	0.31618	0.22799	0.57813	0.06923	0.13878	0.71913	0.13728	0.08545	0.33609	0.15509	0.10313	0.05498	0.13635	0.42302	0.27768	0.46494	0.36417	0.32259	0.68369	0.09414	0.25908	0.54156	0.38732	0.01152	0.09666	0.18968	0.092	0.45788	1.19253	0.29976	0.51629	0.73246	0.50022	0.14406	0.41669	1.05273	0.52404	0.55405	0.42417	0.41531	0.18999	0.49625	0.59706	0.49419	0.39668	0.54706
1.3	0.24965	0.5498	0.08257	0.62264	0.18616	0.72316	0.08948	0.32665	0.62528	0.03015	0.07011	0.55814	0.26432	0.22263	-0.00228	0.14691	0.42537	0.52699	0.60631	0.07021	0.40428	0.67663	0.22369	0.39653	0.47255	0.36085	0.03909	0.00838	0.29205	0.06734	0.1421	0.76949	0.28908	0.72559	0.70237	0.22466	0.06536	0.52014	0.65565	0.44024	0.49316	0.36688	0.81071	0.11547	0.26894	0.57498	0.14697	0.33773	0.72649
1.4	0.38467	0.69311	0.76144	0.2701	0.00063	0.88369	-0.02179	0.25674	0.83536	0.1625	0.02414	0.16625	0.23334	0.07833	0.04156	0.0362	0.43094	0.56124	0.35571	0.04255	0.3718	0.21972	0.3194	0.30123	0.52597	0.49193	0.06261	0.01591	0.34121	0.00593	0.08918	0.46426	0.27487	0.68563	0.74242	0.39331	0.21555	0.25024	0.46596	0.40604	0.04507	0.21745	0.54841	0.18225	0.20826	0.34612	0.31608	0.3847	0.51457
1.5	0.4059	0.75762	0.85282	0.35699	0.08873	0.53241	0.00246	0.075	1.01113	0.40984	0.14765	0.10439	0.28676	0.10992	-0.00485	0.03291	0.26052	0.39271	0.46494	0.08314	0.38026	0.09447	0.33858	0.42999	0.42219	0.34992	-0.00079	0.08976	0.28869	0.10106	0.08918	0.9082	0.60682	0.51629	0.72295	0.50022	0.03259	0.46229	0.28523	0.39237	0.39609	0.20234	0.41531	0.12019	0.14122	0.77324	0.1175	0.18994	0.20256
Cas9 alone
GFP(+)	FT1117 (A.U.)
µm	bouton #1	#2	#3	#4	#5	#6	#7	#8	#9	#10	#11	#12	#13	#14	#15	#16	#17	#18	#19	#20	#21	#22	#23	#24	#25	#26	#27	#28	#29	#30	#31	#32	#33	#34	#35	#36	#37	#38	#39	#40	#41	#42	#43	#44	#45	#46	#47	#48	#49
-1.5	0.5334	0.03634	0.14458	0.07248	0.90575	0.739	0.34911	0.32548	0.05611	0.22636	0.31484	0.4552	0.61271	0.63801	0.18138	0.27681	0.69762	0.06669	-0.02851	0.05988	0.29715	-0.03215	0.08378	0.18232	-0.03186	0.00945	-0.01673	1.04724	0.79253	0.79412	0.03781	0.0268	0.14688	0.15339	0.19322	0.8336	0.20005	0.4676	0.72263	0.65053	0.15601	0.36644	0.37551	0.03509	0.37597	0.31792	0.50163	0.69229	0.52698
-1.4	0.4958	0.04756	0.26184	0.01849	0.90434	0.88706	0.26293	0.33831	0.02483	0.29426	0.25186	0.37014	0.48843	0.6215	0.11633	0.327	0.64977	0.19364	-0.04569	-0.02506	0.27631	0.00994	0.02619	0.15107	-0.01275	-0.01029	-0.03189	0.88436	0.76503	1.1537	0.00695	0.06147	0.20318	0.17503	0.144	0.79123	0.26286	0.45336	0.73382	0.49373	0.13255	0.39574	0.327	0.02978	0.24807	0.18474	0.58025	0.81493	0.75683
-1.3	0.58226	0.0201	0.15866	0.00531	0.81444	0.87437	0.32434	0.33156	0.02702	0.2421	0.32351	0.29092	0.37676	0.44377	0.05375	0.59931	0.52318	0.23935	-0.04631	-0.02702	0.14185	0.08294	0.06729	0.15729	-0.02817	-0.01822	-0.01856	0.9572	0.59569	1.36279	-0.03014	0.19261	0.24203	0.20585	0.12314	0.69156	0.36255	0.34707	0.58979	0.46269	0.12845	0.43558	0.28317	0.00618	0.24815	0.16474	0.68537	1.106	1.05218
-1.2	0.71229	0.00572	0.08068	-0.00603	0.77277	0.84964	0.39377	0.42694	0.04797	0.10009	0.37919	0.22864	0.3919	0.22581	0.06882	0.76535	0.5026	0.15612	-0.04259	0.09232	0.09015	0.10855	0.15736	0.24738	-0.03854	0.03038	-0.01047	1.09752	0.54016	1.46091	-0.01145	0.27247	0.30415	0.24008	0.0934	0.73459	0.32155	0.30974	0.41153	0.51249	0.17138	0.42707	0.27642	0.03679	0.26885	0.29982	0.81577	1.15831	1.09555
-1.1	0.83532	0.00749	0.15815	0.00426	0.89689	0.83489	0.36565	0.51978	0.05836	0.06637	0.33576	0.17893	0.46898	0.1521	0.07902	0.78054	0.48395	0.11443	-0.04119	0.30526	0.09916	0.09831	0.22511	0.26057	0.00052	0.07369	0.0279	1.1035	0.80817	1.32242	0.04611	0.15315	0.43705	0.19037	0.06371	0.74952	0.16831	0.41103	0.31748	0.55452	0.19857	0.49086	0.26828	0.04682	0.23126	0.55319	0.788	0.91075	1.17565
-1	0.78444	0.07632	0.18835	0.02548	1.037	0.78072	0.3501	0.37048	0.09595	0.1526	0.31133	0.172	0.4627	0.19709	0.07748	0.66809	0.35332	0.14155	-0.04408	0.38903	0.10545	0.12345	0.30711	0.30183	0.05217	0.08741	0.03919	1.08832	1.12006	1.02476	0.09509	0.06193	0.50695	0.16758	0.09224	0.62406	0.09141	0.59979	0.38873	0.53936	0.17953	0.66964	0.28308	0.02402	0.21896	0.78397	0.64503	0.77839	1.29865
-0.9	0.72181	0.19796	0.15113	0.03558	0.95495	0.78781	0.33344	0.23236	0.18667	0.23309	0.41171	0.22688	0.39441	0.22302	0.05228	0.42969	0.25461	0.23584	-0.04341	0.31752	0.13767	0.16287	0.45187	0.39222	0.0635	0.1134	-0.00443	1.35284	1.20105	0.9844	0.14347	0.11576	0.5904	0.30295	0.15082	0.47351	0.15917	0.84855	0.54592	0.49454	0.20663	0.767	0.31173	0.08076	0.28466	0.84267	0.60095	0.75609	1.18016
-0.8	0.67129	0.244	0.15618	0.04538	0.75311	0.93101	0.32162	0.25604	0.25564	0.24678	0.48172	0.26998	0.40324	0.24198	0.05896	0.22273	0.27122	0.3583	-0.02146	0.36453	0.16357	0.14391	0.66897	0.45852	0.0425	0.11991	0.08071	1.6831	1.13347	1.13218	0.29584	0.12768	0.86067	0.47931	0.17472	0.44385	0.20664	1.02317	0.61197	0.44341	0.29414	0.74129	0.30577	0.18171	0.35425	0.74365	0.58852	0.74608	0.99945
-0.7	0.44906	0.26168	0.1968	0.14982	0.71796	1.1331	0.38738	0.27884	0.3586	0.27179	0.36461	0.2496	0.613	0.27948	0.10584	0.15223	0.48659	0.4264	-0.01274	0.65862	0.24434	0.13009	0.79554	0.51218	0.0223	0.08422	0.23288	1.71106	1.10986	1.02083	0.69718	0.10889	1.07017	0.54436	0.15087	0.49204	0.15314	1.11223	0.49552	0.52568	0.35881	0.76995	0.26287	0.25021	0.31348	0.76481	0.59431	0.83439	0.87873
-0.6	0.26211	0.34443	0.30303	0.36198	0.74009	1.14547	0.47161	0.29172	0.51328	0.48689	0.19278	0.26402	0.99254	0.32223	0.0843	0.31119	0.87678	0.54667	-0.02097	0.9802	0.47866	0.22173	0.8253	0.4341	0.04353	0.10026	0.27025	2.00758	1.14084	0.65556	1.08926	0.19402	1.16274	0.56559	0.14566	0.56389	0.15133	1.22686	0.35413	0.63573	0.38969	0.80372	0.29394	0.23045	0.24982	1.0292	0.75037	0.97307	0.73503
-0.5	0.20671	0.42056	0.48285	0.68256	0.80337	0.93254	0.46972	0.27313	0.59213	0.95804	0.16546	0.37333	1.37514	0.47354	0.05996	0.46326	1.38473	0.77209	0.05419	1.16619	0.79287	0.43888	0.92977	0.30644	0.09822	0.21206	0.27106	2.50347	1.06611	0.64043	1.21822	0.39359	1.43905	0.62985	0.17189	0.56663	0.24363	1.25406	0.39983	0.53997	0.39587	0.7464	0.3986	0.15152	0.27497	1.40991	0.82014	1.13885	0.76658
-0.4	0.23375	0.55727	0.71312	1.13254	1.10955	0.90129	0.4982	0.35086	0.64656	1.32945	0.2782	0.62419	1.55755	0.7463	0.11687	0.39294	2.02732	0.91703	0.19138	1.29139	1.02024	0.7078	0.93299	0.33048	0.17956	0.36272	0.25602	2.3731	1.03297	0.86542	1.19282	0.57239	1.73098	0.63434	0.17973	0.50721	0.35527	1.18855	0.48138	0.51878	0.38992	0.62194	0.51935	0.17549	0.31949	1.63125	0.77505	1.31432	1.10783
-0.3	0.28952	0.71838	1.1482	1.43764	1.36503	1.01436	0.6719	0.60108	0.74649	1.4831	0.32815	0.89018	1.51118	1.0692	0.22911	0.49345	2.69841	0.8192	0.28859	1.21181	1.06306	0.81937	0.70342	0.40173	0.54926	0.59573	0.4071	2.11903	1.07804	0.84131	1.07878	0.553	1.83209	0.56924	0.22271	0.41316	0.40781	1.18493	0.57977	0.77402	0.47057	0.53324	0.6799	0.27475	0.36496	1.47072	0.8001	1.52747	1.41571
-0.2	0.27767	0.73577	1.44574	1.72363	1.44084	0.96616	0.82608	0.78028	0.83958	1.98884	0.25842	1.10289	1.35548	1.29077	0.40178	0.77659	2.94723	0.6527	0.45029	1.07641	0.95869	0.77842	0.44712	0.65752	1.08869	0.82726	0.72751	2.23091	1.03847	0.82002	1.04297	0.43198	1.81948	0.65381	0.28681	0.24178	0.41762	1.06034	0.7052	0.92929	0.60541	0.5894	0.86365	0.38612	0.44702	1.25502	0.77443	1.82876	1.35116
-0.1	0.24719	0.66509	1.30074	2.20125	1.59039	0.86266	0.82353	0.85506	0.8901	2.68433	0.21116	1.36831	1.20922	1.27064	0.5908	0.89483	2.59402	0.63943	0.67778	1.16563	0.86095	0.77927	0.30798	1.18063	1.27298	0.85537	0.85563	2.28241	0.9997	0.92814	1.1593	0.41579	1.65781	0.88058	0.24	0.14252	0.44377	0.8131	0.64604	0.83053	0.63866	0.72135	1.02376	0.48972	0.50445	1.24003	0.70426	2.03139	1.13404
0	0.24657	0.62912	1.15242	2.45051	1.69814	0.83276	0.78437	0.89384	0.90313	2.95072	0.21024	1.51354	1.15572	1.20228	0.67152	0.89651	2.31694	0.6762	0.77794	1.2558	0.8352	0.80507	0.27212	1.45895	1.2326	0.80937	0.83721	2.2398	0.9988	0.977	1.23137	0.44247	1.53274	0.99032	0.1793	0.1342	0.45921	0.706	0.55322	0.75011	0.61864	0.78564	1.09078	0.5261	0.51599	1.26572	0.68518	2.06994	1.0523
0.1	0.28217	0.58948	1.0849	2.18193	1.4159	0.90426	0.7753	0.9383	0.83029	3.02685	0.37197	1.46277	1.22431	1.36862	0.68227	1.02519	2.60118	0.63404	0.8409	1.25647	0.85796	0.81794	0.27093	1.271	1.34111	0.85002	0.76724	2.21963	1.09441	0.91093	1.09745	0.4949	1.39157	0.97598	0.19171	0.22496	0.43801	0.66705	0.49895	0.67598	0.60037	0.75496	1.08173	0.48598	0.49204	1.33632	0.71994	1.96267	1.03418
0.2	0.33155	0.5294	1.01265	1.70938	0.85263	0.94657	0.7925	1.02595	0.71885	3.01689	0.7889	1.36325	1.35172	1.68303	0.68021	1.35787	2.87553	0.56002	1.12823	1.21073	0.83631	0.83233	0.26348	0.84582	1.69081	1.05366	0.70345	2.12824	1.1523	0.82817	0.77118	0.60494	1.13635	0.95879	0.22987	0.36653	0.38007	0.59932	0.45849	0.51049	0.57966	0.643	1.07954	0.51863	0.48645	1.45144	0.78227	1.65608	0.95504
0.3	0.33824	0.56809	0.98568	1.32965	0.67046	0.84392	0.77641	1.01686	0.66548	2.81502	1.0847	1.25262	1.18742	1.64968	0.55231	1.66092	2.28613	0.62412	1.60058	0.98795	0.62669	0.77909	0.29684	0.62942	2.02156	1.36752	0.70769	1.96228	0.93721	0.84574	0.49812	0.60421	1.00216	0.91892	0.24205	0.37122	0.42427	0.52706	0.57728	0.37676	0.48587	0.54927	1.02962	0.65295	0.51825	1.32822	0.84893	1.2684	0.82861
0.4	0.38409	0.531	0.80479	0.87928	0.80429	0.73786	0.60468	0.85364	0.61003	2.62215	1.06279	1.08162	0.74819	1.25545	0.33264	1.85909	1.51278	0.80232	1.90599	0.66943	0.3674	0.62815	0.37108	0.67003	2.16215	1.52497	0.80699	1.73794	0.75981	0.88679	0.4066	0.41334	0.83128	0.80489	0.23257	0.31031	0.5728	0.42347	0.74191	0.30876	0.36291	0.51265	0.88498	0.60012	0.49463	0.99963	1.07259	0.91585	0.6849
0.5	0.48371	0.2875	0.60368	0.54036	0.85035	0.68345	0.3623	0.57585	0.53582	2.36617	0.99459	1.01791	0.46989	0.96082	0.20931	1.93109	1.1217	0.83551	1.98044	0.45216	0.2606	0.47506	0.41625	0.74698	2.26292	1.46172	0.93891	1.54749	0.74271	0.85164	0.35562	0.24966	0.69727	0.64568	0.29912	0.25069	0.57024	0.38319	0.75494	0.26165	0.36129	0.5852	0.80457	0.36703	0.39575	0.78645	1.33125	0.69271	0.50958
0.6	0.52861	0.1175	0.5951	0.40565	0.85658	0.64911	0.23583	0.40818	0.43441	1.97071	0.95103	1.09014	0.43633	0.80983	0.17556	1.57328	0.60682	0.7631	2.17848	0.31708	0.22491	0.39285	0.47886	0.85399	2.09883	1.42484	0.8109	1.49994	0.70175	0.78752	0.29252	0.25771	0.74207	0.46793	0.3453	0.23049	0.47439	0.43811	0.64233	0.22476	0.30884	0.7605	0.78292	0.16407	0.29374	0.62785	1.31626	0.65178	0.34982
0.7	0.53081	0.08231	0.53002	0.28725	0.76009	0.63465	0.24162	0.45652	0.33078	1.47713	0.81776	0.91267	0.54486	0.71739	0.15346	0.99328	0.25031	0.70372	2.57637	0.22868	0.17996	0.34524	0.577	0.81832	1.69137	1.45324	0.65783	1.41406	0.6682	0.77581	0.26123	0.28003	0.61003	0.30529	0.27961	0.31639	0.42791	0.47841	0.55987	0.24453	0.1987	0.8475	0.6145	0.0643	0.23124	0.44237	1.23245	0.59916	0.27508
0.8	0.49609	0.10699	0.37178	0.2143	0.62289	0.69494	0.25824	0.46082	0.22931	1.03881	0.60238	0.57431	0.5355	0.66266	0.15751	0.71641	0.23349	0.73074	2.60032	0.13638	0.1807	0.30976	0.62543	0.7084	1.38388	1.24122	0.67105	1.16274	0.5389	0.67133	0.25171	0.21538	0.42098	0.20237	0.20464	0.36278	0.32403	0.54682	0.51868	0.30095	0.18972	0.85819	0.37274	0.04561	0.14237	0.37932	1.2366	0.49743	0.24538
0.9	0.3883	0.2105	0.34229	0.17259	0.53398	0.75808	0.3071	0.43265	0.09795	0.80461	0.45705	0.39592	0.44644	0.59197	0.14946	0.64295	0.2288	0.96018	2.00814	0.05079	0.22659	0.26722	0.58147	0.61946	1.0967	0.89331	0.5933	0.96544	0.3107	0.47347	0.31972	0.14774	0.43243	0.19454	0.16588	0.28635	0.19079	0.6921	0.40908	0.30025	0.25407	0.78033	0.24466	0.02748	0.08775	0.43437	1.30701	0.55636	0.25616
1	0.26876	0.26898	0.43932	0.15962	0.53583	0.73234	0.36857	0.51382	0.06222	0.61887	0.48377	0.31937	0.57553	0.48417	0.11058	0.53102	0.18485	1.11438	1.47493	0.05176	0.19157	0.25849	0.47626	0.47176	0.73808	0.69573	0.47176	0.8276	0.14925	0.39801	0.36901	0.13175	0.45102	0.23262	0.16995	0.14712	0.14955	0.74234	0.3027	0.26544	0.32374	0.61328	0.18189	-0.00638	0.16162	0.42947	1.59782	0.69475	0.28398
1.1	0.21285	0.19258	0.54343	0.19756	0.62448	0.69146	0.33564	0.55601	0.14571	0.41487	0.50756	0.34703	0.62772	0.3756	0.13347	0.38591	0.17701	0.97479	1.33243	0.16923	0.08357	0.39679	0.38695	0.32979	0.40635	0.58499	0.52034	0.58014	0.13265	0.40985	0.27749	0.13394	0.44345	0.17859	0.21269	0.04633	0.224	0.60691	0.34839	0.26629	0.34922	0.43862	0.08896	-0.04208	0.26862	0.37238	1.79859	0.82264	0.24271
1.2	0.21384	0.1078	0.44555	0.26248	0.62143	0.67266	0.26367	0.4395	0.21879	0.32885	0.45644	0.44062	0.44233	0.33582	0.19193	0.3311	0.1393	0.82631	1.21542	0.34631	0.04363	0.61428	0.3243	0.22548	0.22763	0.52103	0.62025	0.36869	0.215	0.40765	0.18525	0.12461	0.49928	0.0938	0.27433	0.04086	0.3566	0.51273	0.42682	0.3325	0.40138	0.35483	0.02001	0.01169	0.25017	0.38961	1.58257	0.95194	0.23058
1.3	0.21712	0.07565	0.30732	0.2643	0.51097	0.61609	0.2585	0.35107	0.2583	0.34233	0.49604	0.49931	0.34674	0.34676	0.15079	0.45309	0.07799	0.88211	1.05124	0.3882	0.06998	0.68994	0.27103	0.14216	0.1661	0.49538	0.59159	0.30187	0.21321	0.38812	0.12691	0.15259	0.604	0.14878	0.34873	0.05594	0.4148	0.59903	0.42433	0.45706	0.4544	0.28965	0.01694	0.11566	0.09538	0.36956	1.37707	0.95917	0.23083
1.4	0.16932	0.04698	0.35949	0.28489	0.39769	0.54931	0.31928	0.38814	0.29808	0.36249	0.55265	0.59704	0.39072	0.39891	0.09608	0.52536	0.0754	0.89443	0.9061	0.31351	0.08443	0.53044	0.24882	0.04912	0.15624	0.48552	0.48956	0.24605	0.10368	0.32665	0.07111	0.18229	0.71329	0.26357	0.41075	0.03462	0.44727	0.66019	0.35136	0.6679	0.45142	0.15009	0.01198	0.08886	-0.00229	0.269	1.33539	0.85148	0.16208
1.5	0.0618	0.05717	0.36147	0.31837	0.33617	0.6225	0.39136	0.51631	0.38044	0.4365	0.50656	0.66024	0.41109	0.49933	0.19114	0.51274	0.09891	0.90495	0.75031	0.36109	0.06839	0.31531	0.28789	-0.01379	0.22541	0.51174	0.34805	0.19889	0.06122	0.18619	0.07497	0.10075	0.74101	0.29455	0.37191	6e-05	0.59686	0.61442	0.26234	0.92806	0.45173	0.06636	-0.00546	0.01067	-0.01421	0.2098	1.17362	0.74766	0.1789
control
GFP(-)	FT1117 (A.U.)
µm	bouton #1	#2	#3	#4	#5	#6	#7	#8	#9	#10	#11	#12	#13	#14	#15	#16	#17	#18	#19	#20	#21	#22	#23	#24	#25	#26	#27	#28	#29	#30	#31	#32	#33	#34	#35	#36	#37	#38	#39	#40	#41	#42	#43	#44	#45	#46	#47	#48	#49
-1.5	0.19102	-0.05642	-0.08442	0.19284	0.28024	-0.00682	-0.06619	0.11134	-0.01276	-0.00275	0.1686	-0.04296	-0.04201	0.00147	0.00691	-0.06752	0.00575	0.11682	0.0611	0.23988	-0.12478	-0.09241	-0.05968	-0.10187	-0.14979	-0.09172	-0.13078	-0.0045	-0.10862	-0.12651	-0.04844	0.04453	0.13607	-0.05161	-0.11242	0.11678	0.19312	0.21988	-0.13408	0.12809	0.37597	-0.14545	-0.07641	-0.04025	-0.11319	-0.13385	0.02484	-0.12261	-0.06546
-1.4	0.10216	-0.06847	-0.08111	0.23206	0.26622	-0.05671	-0.09519	0.23867	-0.0052	0.0434	0.04701	-0.04597	-0.06043	-0.0085	-0.03191	-0.10448	0.00323	0.11052	0.03969	0.22224	-0.12544	-0.12833	-0.04798	-0.02069	-0.00078	-0.02918	-0.08829	-0.01578	0.02205	0.01957	-0.04276	0.01722	0.00713	0.00135	-0.12226	0.08687	0.00467	0.32937	-0.14096	0.18657	0.30658	-0.10808	0.00424	-0.01493	-0.11507	-0.0535	0.0904	-0.02664	0.02364
-1.3	0.07389	-0.04536	-0.0802	0.28937	0.18933	-0.06861	-0.12475	0.16497	-0.10112	-0.04359	0.0556	-0.02088	-0.03244	0.013	-0.01682	-0.06282	-0.08616	-0.00565	0.22594	0.08256	-0.06054	-0.07919	-0.13224	-0.04424	-0.01928	0.0283	-0.0881	-0.0858	-0.0716	-0.10815	-0.10104	0.0113	-0.06199	0.68277	-0.05551	0.152	0.12678	0.41574	-0.12919	0.12386	0.05916	-0.07832	-0.11507	0.04903	-0.07271	-0.10863	0.13349	-0.03115	0.09596
-1.2	0.05353	-0.06043	0.07981	0.32868	0.3333	-0.09062	-0.10577	0.20073	-0.03073	-0.10459	0.24018	-0.07521	-0.04192	-0.06654	-0.00481	-0.04398	-0.03909	0.3031	0.4109	0.02883	-0.1412	0.12729	-0.06808	-0.13515	-0.0906	0.03575	-0.12226	-0.01393	-0.0875	-0.13499	-0.0524	0.1337	-0.06542	1.1767	-0.05155	0.20095	0.16323	0.47481	-0.02951	0.01145	0.32202	-0.03344	-0.11985	-0.09729	0.04221	-0.13075	0.14878	-0.07958	0.17551
-1.1	0.14623	-0.05795	-0.01264	0.68494	0.54035	-0.06997	-0.09374	0.24621	0.04922	-0.05192	0.11569	-0.04765	0.10901	-0.11298	0.09774	-0.1132	-0.12816	0.01382	0.64837	0.12628	0.08336	-0.02678	0.04096	-0.1268	-0.11576	-0.07882	-0.12975	0.02082	-0.04479	0.09408	-0.04637	0.17147	-0.0611	1.41135	-0.13041	0.21956	0.22617	0.55928	-0.09896	0.02537	0.16665	-0.10119	-0.14166	-0.05051	-0.08969	-0.06188	-0.08465	0.01642	0.10109
-1	0.0659	0.06982	0.20265	0.83852	0.63087	-0.06758	-0.04167	0.27628	0.05447	-0.06761	0.30934	-0.08796	0.16301	-0.02443	0.0053	-0.07414	-0.01309	0.50974	0.48853	0.4023	-0.0894	-0.04073	0.10943	-0.10297	-0.12428	-0.01614	-0.13747	0.10501	-0.02693	0.03413	-0.04025	0.16271	0.04251	1.40137	-0.10501	0.03754	0.42697	0.72346	-0.09136	0.11025	0.27796	-0.13091	-0.07934	0.01322	0.01717	-0.06599	0.06533	0.04109	0.17858
-0.9	0.16574	0.14857	0.37375	0.88708	0.63057	-0.11981	0.10212	0.45226	0.05414	-0.05461	0.06625	-0.0702	0.16254	0.04319	-0.04572	-0.04054	-0.086	0.51938	1.12673	0.77148	-0.12806	0.05286	0.19233	-0.13196	-0.03487	0.06673	-0.12848	0.26161	0.05612	-0.08096	-0.0695	0.33629	0.04569	1.25426	-0.14141	0.09385	0.25739	0.80869	-0.00032	0.17334	0.24179	-0.13785	-0.14338	-0.00596	-0.02798	-0.03077	0.03283	0.15092	0.02791
-0.8	0.03023	0.23996	0.53766	0.92409	0.76464	-0.0698	0.16317	0.39758	-0.02197	0.04284	0.11712	-0.04765	0.22255	-0.01296	0.05711	-0.02793	0.11787	0.81346	1.27106	0.28088	-0.11225	0.05744	0.08422	-0.11834	-0.0878	0.1019	-0.09697	0.70929	-0.06513	0.04219	0.01718	0.45753	0.08019	1.29033	-0.09446	0.15412	0.55281	0.89889	-0.01615	0.37727	0.53963	-0.07857	0.03066	0.29673	0.02317	0.23835	0.20189	0.06808	0.08853
-0.7	0.18581	0.12007	0.77295	1.02581	0.65642	-0.05781	0.06054	0.52806	0.21093	-0.06258	0.04632	0.03108	0.30449	0.2026	0.03973	0.16263	0.31101	0.98814	1.23801	0.59029	-0.07418	0.00689	-0.04643	0.10519	-0.08297	0.16333	-0.0781	0.47461	0.20212	0.15474	0.16081	0.55584	0.21663	1.06429	-0.12422	0.32553	0.62103	1.19025	0.11292	0.65084	0.41367	-0.11101	0.15517	0.69053	-0.07298	0.16318	0.18127	-0.04808	0.12351
-0.6	0.23311	0.43279	0.91159	1.20069	1.00524	-0.02415	0.21858	0.77544	0.27765	0.00857	0.18315	0.10923	0.29119	0.30486	0.09026	0.16429	0.37478	1.17441	1.33069	0.44081	-0.03469	0.07105	0.0455	0.20355	0.0849	0.22658	-0.05704	0.4648	0.04243	0.22572	0.3765	0.67561	0.5104	0.92748	-0.01879	0.28242	0.74763	1.60989	0.23144	0.73646	0.09243	-0.04964	-0.07396	0.64221	0.01973	0.01984	0.18896	0.09414	0.2197
-0.5	0.42058	0.47134	1.25174	1.63642	1.11117	-0.04573	0.2043	1.0035	0.33736	0.1522	0.44006	0.06323	0.33061	0.61043	0.2596	0.36729	0.44458	1.55117	1.26436	0.3138	0.07964	0.45141	0.14725	0.49818	0.23775	0.45972	0.06804	0.65601	0.08871	0.20208	0.39901	1.44858	0.70935	1.28549	-0.05148	0.56137	1.29738	1.39605	0.33332	0.63007	0.22397	0.13691	-0.11719	0.7391	-0.02846	0.12616	0.35011	0.20333	0.14749
-0.4	0.31424	0.62082	1.66752	1.7229	1.38188	0.00461	0.37605	1.00357	0.42025	0.08696	0.62856	0.09012	0.42509	0.96015	0.26682	0.56758	0.50216	1.39419	1.37879	0.53932	0.40202	0.81131	0.09622	0.75285	0.0704	0.79224	0.3032	0.30625	0.16246	0.57533	0.78339	1.22635	0.78126	1.76658	-0.12458	0.58748	0.74786	1.79083	0.29739	1.20552	0.28472	0.4404	-0.12366	0.76378	-0.03739	0.59214	0.3915	0.07819	0.15751
-0.3	0.43197	0.54647	1.50971	2.16064	1.67869	-0.01045	0.43217	1.29841	0.62757	0.2733	0.65292	0.21206	0.47949	1.05281	0.4235	0.599	0.5551	1.5196	1.6994	0.78667	0.84571	1.31592	0.31873	1.24097	0.31549	1.26599	0.34525	0.23863	0.28649	1.09794	1.22918	1.2854	1.45942	1.97458	-0.01166	0.86045	1.34765	2.14884	0.30154	1.03458	0.11148	0.74735	0.25514	0.80386	0.15935	0.57922	0.54857	0.23982	0.53147
-0.2	0.40814	0.63329	1.362	2.35771	2.55011	-0.02033	0.52578	1.59581	0.78083	0.61044	1.18073	0.12546	0.35065	1.28963	0.31144	0.54442	1.0866	1.40618	1.59726	1.25909	1.25311	1.66834	0.7399	1.29014	0.63841	1.21756	0.72255	0.43004	0.69238	1.50496	1.35057	0.98026	1.38891	2.37353	0.18634	1.20772	1.20874	2.46058	0.36109	1.08856	0.22898	1.28441	0.54272	1.23816	0.52759	0.5575	0.87485	0.25145	0.41798
-0.1	0.50748	0.60957	1.67643	2.59894	3.59968	0.05959	0.54126	1.66142	0.64557	0.86289	1.29459	0.21907	0.49774	1.35582	0.55893	0.46896	1.06302	1.43323	1.69705	1.02628	0.97536	1.54468	1.04697	1.04138	0.70809	1.54946	1.02317	0.66964	1.19962	1.47855	1.57414	0.84027	1.18436	2.86328	0.48414	2.09907	1.01242	2.53801	0.33984	1.17993	0.33861	1.22363	0.26555	0.92181	0.63378	1.02181	1.25143	0.44066	0.4911
0	0.54072	0.62433	1.27976	2.87247	3.36202	-0.00847	0.5871	1.99202	0.69027	0.74123	1.44664	0.15241	0.4714	1.25527	0.69518	0.60577	1.15601	2.86594	2.33612	1.69742	0.9513	1.43794	1.21197	0.63798	1.61164	1.49236	0.76581	0.84927	1.30744	1.11952	1.64221	0.63463	1.00579	2.82938	0.44805	1.60094	0.76598	2.10672	0.28245	1.38993	0.08502	1.61267	0.37603	0.97425	0.86398	1.0801	1.39311	0.88333	0.57838
0.1	0.51083	0.66177	1.21504	2.85997	2.95909	-0.00746	0.47672	2.33376	0.5846	0.99301	1.28373	0.12233	0.35861	1.10821	0.90897	0.4826	1.68218	2.04544	2.15917	1.9627	1.29513	1.31461	1.05628	0.54683	0.91568	1.36944	0.6611	1.20201	1.20777	0.63279	1.68986	0.89054	0.6732	2.93073	0.539	1.53244	1.29192	2.3857	0.36614	1.32384	0.26738	1.68071	0.27625	0.82498	0.83259	0.99588	1.56688	0.68002	0.58248
0.2	0.50338	0.61639	1.22303	2.53525	2.56164	0.05187	0.43438	2.18239	0.79073	0.80634	0.91274	0.09745	0.40637	0.57406	0.86345	0.575	1.82324	1.8659	1.48856	1.39256	0.68017	0.92445	0.7754	0.41469	0.69673	0.89034	0.59362	1.24624	0.93489	1.00189	1.43135	0.99789	0.38516	2.98599	0.30136	1.29237	1.05395	2.12354	0.52384	1.26044	0.22472	1.27378	0.23344	1.3446	0.89379	0.87698	1.11611	0.35	0.58025
0.3	0.52474	0.73624	1.1575	2.19508	1.95951	0.0144	0.21954	1.69482	0.43589	0.51484	0.82473	0.19112	0.62675	0.41754	0.37977	0.60192	1.0885	1.50876	1.70377	0.81609	0.24755	0.4627	0.46291	0.36038	0.71657	0.78504	0.40485	1.41413	0.7064	0.35642	1.24674	0.99772	0.77668	2.59263	0.32773	0.64837	1.23582	1.5917	0.59377	1.52127	0.88874	1.07193	0.09076	1.30653	0.26866	0.25833	0.78133	0.23234	0.36141
0.4	0.32589	0.82826	1.01918	1.38748	2.06522	-0.03066	0.17805	1.12403	0.25769	0.29388	0.51115	0.19585	0.5051	0.4757	0.60236	0.66381	0.49328	1.05216	1.67671	0.46511	0.07485	0.29253	0.21404	0.23822	0.30458	0.62064	0.27783	1.28077	0.60699	0.17813	0.86711	1.21444	0.45313	1.94765	0.10727	0.38308	1.07713	1.37107	0.27983	1.8235	0.52243	0.72007	0.1187	0.95886	0.29624	0.19303	0.59346	0.09356	0.3395
0.5	0.17697	0.54404	1.10414	1.14606	1.69023	-0.09426	0.17377	0.66496	0.2719	0.27319	0.28723	0.20205	0.32342	0.34486	0.50011	0.62432	0.49942	0.52137	1.74267	0.26123	-0.0566	0.17156	0.19145	0.0645	0.13475	0.37106	0.17033	0.8886	0.40757	0.03705	0.52243	0.87734	0.27608	1.74432	0.03106	0.27245	0.75397	1.08549	0.11873	1.15561	0.676	0.18171	0.12274	0.70858	0.2842	0.16011	0.40126	0.03743	0.11668
0.6	0.03727	0.19698	0.69178	0.51337	1.38676	-0.03693	0.20201	0.3855	0.19855	0.15147	0.49673	0.16462	0.61743	0.25633	0.43655	0.31284	0.08378	0.58089	1.6079	0.13273	-0.06425	0.08545	0.15955	0.28361	0.11888	0.26641	0.01327	0.59495	0.17614	0.02377	0.46276	0.42411	0.51931	1.61725	-0.05981	0.24715	0.67318	0.71524	0.0188	0.68645	0.45576	-0.10123	0.13259	0.27253	0.13264	0.14622	0.39076	0.05654	0.15522
0.7	0.07122	0.22513	0.73392	0.21726	1.11784	-0.03876	0.17421	0.24602	0.18149	0.08953	0.34329	0.20251	0.36642	0.44101	0.27292	0.10474	-0.01584	0.33223	1.21442	0.14439	-0.04131	0.0122	-0.00632	0.24307	-0.0061	-0.08048	-0.00323	0.39748	0.09207	-0.06021	0.19173	0.20386	0.16419	1.36829	-0.07716	0.24527	0.56026	0.67984	-0.05028	0.30753	0.49996	-0.04783	0.01725	-0.09587	-0.08276	0.01199	0.086	0.03689	0.15089
0.8	0.00099	0.17049	0.66853	0.17002	0.71175	-0.04487	0.05844	0.08962	0.07977	0.07954	0.2083	0.16449	0.14531	0.36096	0.24525	0.02237	-0.06779	0.11429	0.68256	-0.04783	-0.09822	-0.07869	-0.08984	0.12635	0.0164	-0.03882	0.24723	0.34145	0.10694	-0.04873	0.0723	0.14099	0.09953	0.97409	-0.10201	0.43337	0.22612	0.54038	0.05749	0.03931	0.64409	-0.12847	0.3101	0.01454	-0.03158	-0.02895	-0.00094	0.06979	0.0851
0.9	-0.00235	0.0906	0.50798	0.18734	0.45209	-0.01224	0.00937	-0.0197	0.16142	0.04561	0.21488	0.22661	0.0725	0.31437	0.2018	-0.01403	-0.09447	0.12885	0.96467	-0.08717	-0.12499	-0.04378	0.03293	0.00383	0.03829	0.03017	0.28236	0.12428	0.00692	-0.02973	-0.13301	0.1508	0.21893	0.76623	-0.10578	0.36757	0.30503	0.36607	-0.1066	-0.00523	0.41538	-0.02022	0.10184	-0.06667	0.02837	-0.02231	0.09609	0.11732	-0.03286
1	-0.02371	0.00871	0.38618	0.00015	0.55715	-0.04936	0.08859	-0.01304	0.01194	0.06928	0.11842	0.32613	-0.05982	0.2902	0.16327	0.01723	-0.11504	-0.00595	0.38332	0.19495	-0.12	-0.09875	-0.00886	-0.06136	0.12196	-0.03355	0.1249	-0.00955	0.04493	0.06218	-0.05804	0.12178	-0.02622	0.77909	-0.12878	0.26424	0.15513	0.14321	-0.12782	-0.07886	0.40722	-0.01318	-0.01082	-0.05009	0.02432	-0.06166	0.0654	0.14931	0.0677
1.1	0.05702	-0.10041	0.34735	0.02728	0.5152	-0.01199	-0.05608	0.03863	-0.01004	0.02242	0.18144	0.1008	0.00235	0.24778	0.1038	0.0321	-0.09806	-0.09628	0.38421	0.21179	-0.10996	-0.09391	-0.07687	-0.09454	-0.07469	-0.05001	0.12198	0.07119	-0.003	0.00402	-0.0159	0.07232	-0.01756	0.75856	-0.0833	0.17691	0.10607	-0.03512	-0.05664	-0.01505	0.12175	-0.02389	0.02811	0.24061	-0.027	-0.05979	-0.08008	-0.07082	0.22823
1.2	0.07868	-0.07329	0.28286	-0.02243	0.69291	-0.02065	-0.07592	0.00771	0.00112	0.00531	0.08374	0.00463	7e-05	0.20593	0.03922	-0.01701	-0.03587	-0.10596	0.18657	0.03155	0.15474	-0.0965	-0.07952	-0.04706	-0.11269	-0.07692	0.07366	0.05982	-0.02694	0.01949	-0.03366	0.07698	0.06033	0.70919	-0.11302	0.24771	0.18544	0.03475	-0.07682	-0.0258	0.15291	-0.12636	0.1055	0.12485	-0.14545	-0.10969	-0.05051	-0.09879	0.05993
1.3	0.02766	-0.08251	0.33781	-0.01996	0.51146	0.02035	-0.0631	0.09056	-0.08542	-0.05337	0.00645	0.01338	0.03455	0.15792	0.00944	0.06848	-0.11207	0.00308	0.09519	0.10109	0.10847	-0.10412	-0.0457	0.03725	-0.01764	-0.10149	0.09159	-0.11883	0.12069	-0.04462	-0.123	-0.03656	-0.09852	0.74365	-0.12431	0.19438	0.21124	0.0537	-0.07418	-0.07318	0.15054	0.05103	0.22656	-0.01639	-0.08427	-0.09799	-0.01811	-0.10882	0.17086
1.4	0.04787	-0.10295	0.42919	-0.05895	0.47644	-0.00523	-0.07253	0.10417	-0.04308	-0.05025	0.0675	-0.08165	0.09189	0.16646	0.10474	0.02985	-0.14007	-0.07831	0.0181	0.08335	0.02449	-0.09492	0.03289	-0.09524	0.0632	-0.03549	0.00373	-0.0541	0.0403	-0.04515	-0.01378	0.02193	-0.08401	0.78341	-0.13556	0.34318	0.23634	0.02039	-0.08779	-0.04967	0.07224	0.04699	-0.04565	0.11288	-0.10051	-0.08979	0.01187	-0.05784	0.09463
1.5	-0.00666	-0.0562	0.43837	-0.05969	0.41628	-0.05034	-0.0837	0.11182	-0.02094	-0.09455	0.07425	-0.0232	-0.02143	0.06152	-0.00959	0.02468	-0.12995	-0.06372	0.06067	0.11485	0.08242	-0.04061	-0.0672	-0.04839	-0.04028	0.01815	-0.11007	-0.11922	-0.05463	0.02142	-0.01241	0.28507	-0.12143	0.6812	-0.12347	0.31531	0.30831	0.02522	-0.056	-0.10303	0.00553	0.1532	-0.11795	0.09372	-0.11535	-0.04401	0.03467	-0.08754	0.06883
GPR55 KD
GFP(-)	FT1117 (A.U.)
µm	bouton #1	#2	#3	#4	#5	#6	#7	#8	#9	#10	#11	#12	#13	#14	#15	#16	#17	#18	#19	#20	#21	#22	#23	#24	#25	#26	#27	#28	#29	#30	#31	#32	#33	#34	#35	#36	#37	#38	#39	#40	#41	#42	#43	#44	#45	#46	#47	#48	#49
-1.5	0.08963	0.28112	0.31258	0.03421	0.14436	0.30382	0.65982	0.58335	0.33373	0.05072	0.18507	0.17435	0.71852	0.54734	0.36588	0.12313	0.15298	0.42563	0.16056	0.04239	0.09546	0.10462	0.35262	0.08531	0.18045	0.11787	0.29284	0.08196	0.09152	0.1404	-0.18988	-0.18978	-0.18553	-0.19214	-0.09107	-0.18771	-0.15476	-0.17354	-0.07954	-0.05501	-0.17356	-0.19196	-0.16469	-0.1322	-0.15304	-0.17933	-0.09625	-0.16576	-0.15272
-1.4	0.03186	0.28176	0.18386	0.05347	0.0961	0.433	0.41002	0.67003	0.37166	0.06092	0.11019	0.41859	0.66368	0.4132	0.0976	0.2299	0.24102	0.13496	0.20367	0.05051	0.19522	0.47901	0.04888	0.09399	0.26369	0.22357	0.34938	0.10227	0.06567	0.06126	-0.18696	-0.16587	-0.17472	-0.19132	-0.18257	-0.17623	-0.16684	-0.16995	-0.17366	0.16743	-0.18132	-0.1756	-0.1923	-0.17202	-0.12419	-0.1101	-0.11621	-0.16679	-0.18072
-1.3	0.03946	0.29862	0.21912	0.10317	0.0685	0.4255	0.24837	0.56444	0.29543	0.06883	0.03198	0.24702	0.32386	0.38046	0.13808	0.27723	0.16774	0.12317	0.09334	0.07537	0.18806	0.38002	0.12007	0.21524	0.05189	0.46814	0.28635	0.03593	0.10969	0.12477	-0.16338	-0.15323	-0.16793	-0.17854	-0.09812	-0.0485	-0.17547	-0.17903	-0.16605	0.16747	-0.16665	-0.18444	-0.1815	-0.18413	-0.15035	-0.13326	-0.10055	-0.08996	-0.15177
-1.2	0.07161	0.23687	0.25494	0.08759	0.12165	0.54245	0.37363	0.46549	0.20269	0.11568	0.07769	0.28052	0.69176	0.14701	0.17292	0.34654	0.28746	0.23466	0.14686	0.08239	0.1747	0.3288	0.11909	0.08899	0.03821	0.33087	0.28796	0.09706	0.26815	0.18803	-0.05362	-0.13341	-0.14924	-0.11999	-0.1014	-0.08147	-0.16865	-0.16805	-0.17862	0.05342	-0.17562	-0.18871	-0.17428	-0.11089	-0.1697	-0.17373	-0.04435	-0.16948	-0.13473
-1.1	0.05462	0.27192	0.41568	0.05744	0.24384	0.25947	0.33526	0.28889	0.28512	0.20755	0.29431	0.1948	0.37924	0.13101	0.15362	0.40059	0.4622	0.08389	0.29251	0.11861	0.32903	0.2744	0.07023	0.10244	0.06014	0.12225	0.4837	0.18889	0.0923	0.38054	-0.08926	-0.15176	-0.14441	-0.11184	-0.17472	0.04563	-0.15534	-0.17232	-0.1501	0.20254	-0.14665	-0.16992	-0.134	-0.16054	-0.1586	-0.18586	0.04126	-0.18204	-0.16365
-1	0.11149	0.25618	0.29944	0.03497	0.45926	0.26196	0.41809	0.30269	0.15567	0.283	0.33163	0.18786	0.20932	0.346	0.09488	0.3985	0.31599	0.0396	0.39581	0.08312	0.26809	0.44284	0.15194	0.1032	0.1998	0.09899	0.54233	0.13224	0.07747	0.45274	-0.04193	-0.09236	-0.15735	-0.10517	-0.14473	0.25106	-0.14373	-0.15369	-0.188	0.3301	-0.12663	-0.0668	-0.12157	-0.15671	-0.15219	-0.18392	0.16882	-0.18945	-0.14064
-0.9	0.08751	0.13245	0.42283	0.05292	0.47761	0.21463	0.49903	0.38922	0.15152	0.21561	0.31914	0.069	0.20177	0.39185	0.14222	0.43168	0.39512	0.12622	0.36517	0.36467	0.10366	0.45505	0.08851	0.17065	0.17814	0.22408	0.31998	0.15375	0.22143	0.58063	0.05243	0.02447	-0.07447	0.12613	-0.15507	0.27151	0.02838	-0.15359	-0.1669	0.30589	-0.11839	-0.03261	-0.14855	-0.17797	-0.12838	-0.15624	0.3011	-0.18372	-0.15867
-0.8	0.21651	0.19013	0.49074	0.07138	0.43695	0.20323	0.43776	0.53457	0.37279	0.48979	0.18632	0.06043	0.33794	0.47509	0.19519	0.22105	0.26919	0.16559	0.41286	0.21376	0.25425	0.29116	0.09909	0.31566	0.14235	0.13386	0.72433	0.10889	0.1957	0.31822	0.55692	0.1194	0.02629	0.07405	-0.11984	0.24935	0.29272	-0.14721	-0.10622	0.1561	-0.06886	-0.06051	-0.12436	-0.18588	-0.18316	-0.12317	0.37226	-0.15416	-0.11599
-0.7	0.26347	0.12827	0.18286	0.27035	0.36628	0.57043	0.70327	0.55833	0.32395	0.42219	0.21216	0.27326	0.48509	0.28696	0.20208	0.26176	0.20913	0.21203	0.45194	0.3355	0.44716	0.45366	0.08436	0.19107	0.08117	0.1451	0.73916	0.15008	0.13321	0.16156	0.79397	0.28224	0.07622	0.11862	-0.03087	0.47434	0.41538	-0.13867	-0.12069	0.17773	-0.03856	0.33961	-0.03632	-0.13343	-0.10532	-0.10942	0.53492	-0.13273	0.03474
-0.6	0.20803	0.50743	0.17278	0.22452	0.50938	1.03426	0.69405	0.45459	0.47176	0.79977	0.07522	0.13961	0.30851	0.37085	0.65799	0.20075	0.25002	0.28861	0.5035	0.34654	0.45567	0.43646	0.10481	0.24858	0.2847	0.26811	0.55469	0.15863	0.11469	0.26942	0.93194	0.46669	0.08186	0.39713	0.21729	0.44585	0.55721	-0.15895	-0.0902	0.15168	-0.09254	0.27799	0.02799	-0.13863	-0.08554	-0.01016	0.54953	-0.12161	0.09749
-0.5	0.22285	0.50563	0.2332	0.137	0.62283	0.78899	0.36183	0.69102	0.46857	1.06799	0.08509	0.1116	0.543	0.4536	0.75748	0.09686	0.22981	0.46674	0.5833	0.58195	0.50396	0.53606	0.12725	0.26099	0.41635	0.16593	0.64097	0.29902	0.13585	0.47469	0.91099	0.66808	0.17177	0.36851	0.90384	0.39536	0.53558	-0.09649	0.09754	0.28098	0.09889	0.33906	0.09722	-0.05151	-0.02946	0.16194	0.82787	0.07914	0.16061
-0.4	0.20465	0.20703	0.43143	0.22537	0.63283	0.55284	0.33906	0.76325	0.69905	0.98207	0.07045	0.34502	0.93219	0.57162	0.53075	0.25979	0.29734	0.97918	0.38243	0.79177	0.62639	0.66815	0.30176	0.28263	0.37739	0.17228	0.82519	0.54922	0.42537	0.31333	0.87849	1.05733	0.40272	0.65306	0.98475	0.46258	0.51172	0.26365	0.26098	0.09126	0.23125	0.76919	0.19611	-0.04315	0.22443	0.61251	1.14114	0.49834	0.54231
-0.3	0.20524	0.49633	0.5228	0.39043	0.55773	0.5696	0.43489	0.43391	0.70376	1.05456	0.23027	0.92313	0.50734	1.07042	0.72341	0.49836	0.44851	1.03229	0.77091	0.62685	0.68939	0.92321	0.52435	0.4904	0.58646	0.33222	0.75815	0.44707	0.46869	0.71243	1.22339	1.22553	0.97051	0.48823	1.19077	0.62203	0.48889	0.87992	0.67651	0.10578	0.30699	0.79308	0.25443	0.23215	0.26329	0.72787	1.27741	0.58195	0.67766
-0.2	0.30743	0.49152	0.5833	0.59096	0.82524	0.72381	0.47175	0.31224	1.0405	1.3437	0.64332	0.6195	0.60808	1.45504	1.08353	0.70266	1.04416	0.88451	1.02812	0.84672	1.00124	1.11865	0.72184	0.72769	0.56469	0.58376	0.75773	0.51815	0.60369	0.72307	1.57304	1.42537	2.09261	0.76097	1.515	0.41112	0.45233	1.49861	1.57512	0.24054	0.51418	0.78485	0.50555	0.38386	0.24067	0.85427	1.53207	0.76954	0.89459
-0.1	0.32934	1.07942	0.52921	0.82623	1.0042	1.02267	0.59636	0.586	1.3009	1.64904	1.07111	0.85495	0.9425	1.5352	1.28596	0.63912	1.59627	0.96278	1.14085	0.6911	1.26153	1.62917	0.80909	1.1198	0.86105	0.65959	1.30127	0.88282	0.73098	1.08545	1.75871	1.74223	2.29668	0.95734	1.70583	0.5819	0.46166	1.97151	1.75862	0.44049	0.65754	1.17384	0.79495	0.6839	0.27997	0.80873	1.5386	1.05106	0.97163
0	0.35365	0.76434	0.83844	0.85477	1.38579	1.16905	1.06805	0.90092	1.19428	1.31048	0.7485	0.72868	1.14647	1.42161	1.11142	0.5532	1.06758	1.20501	1.78149	0.77463	1.07156	1.59136	0.60975	0.80326	0.9582	0.61387	1.77837	0.79971	0.63041	0.87444	1.59112	1.9089	2.32609	0.87142	1.40143	0.44305	0.71873	2.00086	1.37407	0.36086	0.66448	1.15318	0.74758	0.62416	0.53633	1.04203	1.32207	1.32521	1.08893
0.1	0.44591	0.5062	0.54947	0.39485	0.95306	1.17904	0.96204	0.7683	1.07368	1.29015	0.56613	1.28816	1.70218	1.21647	0.79379	0.66483	0.79622	1.75399	1.78643	1.04054	1.11086	0.97828	0.4964	0.32651	0.71177	0.7242	1.31916	0.96517	0.8301	0.77797	1.49088	1.64929	2.19918	0.78506	1.3762	0.42496	0.71547	2.01462	1.41499	0.56096	0.73404	0.95381	0.98145	0.58524	0.56361	1.16502	1.42223	1.34961	1.13286
0.2	0.67157	0.71629	0.63082	0.50162	0.66424	1.00608	0.59101	0.48705	0.76173	1.44285	0.56063	1.04457	0.99267	0.93971	1.03419	0.51818	0.59977	1.51347	1.33856	0.6728	0.6886	1.23424	1.01957	0.40586	0.97233	0.6591	1.19036	0.74501	0.80886	0.96227	0.96201	1.20312	1.8788	0.66253	1.3472	0.54427	0.32063	1.9515	1.68416	0.27423	0.47094	0.56596	0.4811	0.67287	0.44781	0.80328	1.23521	1.19018	0.85681
0.3	0.67629	0.57493	0.53452	0.3587	0.40879	0.41107	0.43701	0.46643	0.30392	0.81926	0.5386	0.55625	0.51119	1.0191	0.8075	0.40669	0.50261	0.76341	1.07319	0.75047	0.52973	0.94167	0.48341	0.70063	0.57116	0.44252	0.91984	0.61895	0.37934	0.7394	0.71942	0.67167	1.83741	0.80321	1.17459	0.19002	0.46073	1.86359	1.42898	0.17437	0.63508	0.45045	0.66201	0.51257	0.28418	0.67339	1.35609	0.80373	0.74341
0.4	0.46014	0.30433	0.42082	0.32364	0.54057	0.40815	0.55188	0.55538	0.65059	0.66477	0.39428	0.88608	0.40843	1.05495	0.49211	0.14105	0.57459	0.54471	0.44678	0.60291	0.88111	0.36382	0.20123	0.68588	0.46348	0.34221	0.61599	0.44509	0.35809	0.51799	0.61786	0.40749	1.82908	0.67349	1.22996	0.00147	0.08474	1.65196	1.03566	0.28698	0.63881	0.29288	0.6065	0.22633	0.22919	0.40582	1.12311	0.60885	0.59113
0.5	0.45885	0.46467	0.20898	0.66098	0.4105	0.46467	0.69171	0.74052	0.51009	0.399	1.09003	0.6255	0.36679	1.24415	0.3693	0.27102	0.42046	1.07703	0.31467	0.3917	0.79313	0.37779	0.29236	0.30594	0.28292	0.27647	0.70552	0.51141	0.24962	0.67889	0.62127	0.22015	1.70297	0.78406	0.94414	-0.01477	0.04253	1.28324	1.05471	0.25186	0.5438	0.09184	0.14124	0.17724	0.24615	0.15694	0.77761	0.53722	0.09489
0.6	0.44994	0.2629	0.24012	0.52287	0.18878	0.52114	0.82362	0.68054	0.36799	0.5127	0.26787	0.5566	0.26669	0.72626	0.28863	0.21528	0.44393	0.78803	0.25554	0.22724	0.59139	0.33075	0.18842	0.226	0.31753	0.3355	0.57435	0.65584	0.32144	0.61648	0.58689	0.0123	1.41422	0.81268	0.91268	-0.11607	-0.05708	0.8693	1.11129	-0.07982	0.33992	0.06382	0.03211	0.07031	0.21549	0.01015	0.42584	0.38888	-0.06915
0.7	0.33974	0.21035	0.25484	0.36185	0.22402	0.64102	0.54898	0.42985	0.15239	0.55603	0.23328	0.39624	0.25819	0.67452	0.12463	0.16177	0.13434	0.2778	0.12149	0.23465	0.61605	0.47125	0.10453	0.24146	0.48358	0.30496	0.4749	0.47538	0.29208	0.31004	0.33515	-0.03805	1.26159	0.69863	0.76288	-0.1357	-0.03368	0.71512	0.46822	-0.12796	0.22034	-0.10506	0.0064	-0.01537	0.1853	-0.08246	0.28908	0.2539	-0.03164
0.8	0.12152	0.48778	0.26593	0.36149	0.24699	0.37647	0.51686	0.30062	0.06313	0.23482	0.11447	0.32511	0.10976	0.33477	0.11773	0.07865	0.27056	0.43852	0.14927	0.18605	0.41828	0.36825	0.22665	0.23206	0.71529	0.19472	0.35891	0.54551	0.2346	0.19045	0.11127	-0.05816	0.58979	0.65962	0.43517	-0.13765	-0.1089	0.45138	0.47649	-0.14652	0.26057	-0.10061	-0.08409	-0.03848	-0.10776	-0.15457	0.02561	0.03322	-0.0589
0.9	0.07849	0.67622	0.21589	0.23167	0.1525	0.18275	0.40989	0.27459	0.10409	0.1788	0.20006	0.13747	0.06009	0.21646	0.08598	0.11118	0.33832	0.54163	0.08727	0.11893	0.41645	0.64904	0.28545	0.1378	0.37239	0.22188	0.35883	0.37629	0.20809	0.06997	-0.03633	-0.14487	0.52995	0.69252	0.12029	-0.15177	-0.08977	0.40352	0.4899	-0.15807	0.13331	-0.11013	-0.08594	-0.00262	-0.02495	-0.13897	-0.06875	0.03597	-0.05698
1	0.29263	0.84751	0.11842	0.21531	0.11026	0.12752	0.47273	0.20924	0.18088	0.19957	0.16719	0.56375	0.5137	0.08203	0.14969	0.1471	0.24132	0.33336	0.10176	0.19263	0.35162	0.151	0.138	0.09149	0.5783	0.21721	0.29871	0.14468	0.1368	0.16148	-0.09539	-0.13006	0.31021	0.63661	0.21471	-0.17537	-0.12544	0.29669	0.07485	-0.18736	0.01725	-0.12693	-0.11386	-0.10494	-0.13421	-0.16054	-0.13131	0.03653	-0.13671
1.1	0.16722	0.75067	0.17487	0.48393	0.18947	0.0864	0.18558	0.09131	0.23141	0.2941	0.07806	0.69321	0.3689	0.09563	0.11676	0.21261	0.21251	0.19008	0.08898	0.21139	0.142	0.22084	0.11383	0.25111	0.62279	0.24144	0.23278	0.3407	0.06477	0.44816	-0.15946	-0.14941	0.20058	0.4356	0.08172	-0.15342	-0.10241	0.17443	0.00466	-0.09928	-0.0441	-0.12519	-0.17186	-0.16774	-0.17776	-0.16751	-0.13542	0.04131	-0.12508
1.2	0.19062	0.61667	0.04828	0.2951	0.26653	0.12374	0.34203	0.08681	0.16573	0.45959	0.04781	0.61827	0.23609	0.07223	0.16806	0.21684	0.11887	0.16336	0.15572	0.20099	0.16356	0.17839	0.04622	0.18656	0.33714	0.2327	0.08606	0.31829	0.14201	0.23867	-0.18691	-0.18409	-0.00781	0.3268	-0.02088	-0.13765	-0.11926	-0.04233	-0.02041	-0.12105	-0.07127	-0.14385	-0.16799	-0.17711	-0.16985	-0.16037	-0.17151	-0.0687	-0.11946
1.3	0.28469	0.71256	0.12164	0.1977	0.42731	0.13172	0.18886	0.14958	0.18347	0.39722	0.0864	0.18895	0.27512	0.06257	0.23647	0.26174	0.16752	0.16041	0.05986	0.19585	0.10867	0.23763	0.11241	0.07407	0.29265	0.12416	0.25203	0.3208	0.15779	0.25265	-0.19259	-0.13415	-0.09964	0.19132	-0.04896	-0.15177	-0.15054	0.04429	0.07606	-0.13176	-0.07814	-0.15231	-0.10704	-0.16715	-0.15463	-0.16413	-0.16857	-0.1375	-0.10864
1.4	0.18337	0.5625	0.04859	0.3417	0.16068	0.04438	0.21092	0.24336	0.2201	0.43962	0.0383	0.16513	0.53741	0.0891	0.22251	0.23642	0.17882	0.3122	0.07003	0.35337	0.20843	0.08419	0.33854	0.09647	0.35882	0.28547	0.41933	0.37018	0.15149	0.21355	-0.18691	-0.15363	-0.16892	0.3268	-0.02088	-0.17537	0.00131	-0.14484	-0.02041	-0.17283	-0.08589	-0.14385	-0.13767	-0.17711	-0.16687	-0.15027	-0.17151	-0.15265	-0.11583
1.5	0.15003	0.27645	0.05779	0.24677	0.11826	0.13082	0.46546	0.18079	0.14178	0.33732	0.08795	0.08587	0.17146	0.13247	0.22075	0.55204	0.12683	0.22923	0.03814	0.3073	0.21081	0.04068	0.24771	0.18667	0.17576	0.18445	0.19348	0.11946	0.26973	0.09389	-0.19259	-0.15363	-0.16892	0.19132	-0.04896	-0.15342	0.00131	-0.13185	0.07606	-0.16996	-0.02268	-0.15231	-0.18992	-0.16715	-0.15243	-0.19476	-0.16857	-0.14569	-0.16496
Cas9 alone
GFP(-)	FT1117 (A.U.)
µm	bouton #1	#2	#3	#4	#5	#6	#7	#8	#9	#10	#11	#12	#13	#14	#15	#16	#17	#18	#19	#20	#21	#22	#23	#24	#25	#26	#27	#28	#29	#30	#31	#32	#33	#34	#35	#36	#37	#38	#39	#40	#41	#42	#43	#44	#45	#46	#47	#48	#49
-1.5	-0.04285	0.49278	0.03064	0.04633	-0.02027	-0.03079	0.02111	0.14887	0.17467	-0.0164	0.06283	0.09241	0.08167	0.03404	0.05102	-0.04708	-0.09971	0.07443	0.25716	-0.01177	0.52757	-0.08503	0.19379	0.0454	0.0395	0.20026	0.1293	0.16643	0.01882	0.00686	0.0219	-0.04324	0.09279	0.15234	0.14462	0.13781	0.146	0.00429	0.10768	0.04367	0.05952	-0.07311	-0.04151	0.11283	0.0848	-0.09493	0.01565	0.04971	-0.00402
-1.4	0.15444	0.38146	0.243	0.08829	-0.03118	-0.08798	-0.00991	0.13585	0.19103	0.18858	-0.09111	0.00716	0.13774	0.17952	-0.05634	-0.06729	-0.11208	-0.06652	0.13189	0.16812	0.18013	0.00075	0.25845	-0.03898	0.02109	0.17009	0.18914	0.15126	-0.03211	0.03835	-0.07622	0.08003	0.0687	0.45411	0.30054	0.12038	0.21767	0.05627	0.0459	0.10458	0.07015	-0.10877	0.03886	-0.0117	-0.05101	-0.08169	0.00348	0.03754	0.01707
-1.3	0.10364	0.31329	0.13435	0.10766	0.01823	-0.09991	0.02804	0.1241	0.18104	0.02368	-0.04909	0.07344	0.13156	0.27025	0.07875	-0.07584	-0.08817	-0.09432	-0.00286	0.06025	0.34469	-0.03593	0.60776	0.06783	0.10572	0.31517	0.05839	0.02991	0.11245	-0.05715	0.04899	-0.04194	0.23086	0.5358	0.28183	-0.02428	0.0719	-0.02944	0.09546	-0.00255	-0.07221	-0.05419	0.23192	0.34337	0.12764	-0.07629	0.24288	0.001	-0.00048
-1.2	0.28566	0.10628	0.01773	-0.063	-0.02328	-0.0308	0.14771	0.10296	0.2945	0.11162	-0.06554	0.02851	0.24288	0.1224	0.09271	-0.10084	-0.0929	0.0828	0.0082	-0.02405	0.07348	0.05473	0.54874	0.04178	0.12635	0.06101	0.04819	0.09035	0.0717	-0.07	0.03196	0.17538	0.1188	0.62531	0.16094	0.14976	0.11818	-0.05715	-0.05154	0.01753	-0.04062	-0.01831	0.05103	0.06003	0.14514	-0.0176	0.35979	0.044	0.00116
-1.1	0.18462	0.15975	0.0927	0.24232	0.04164	0.00613	0.32627	0.03602	0.1978	0.32489	0.08686	-0.04472	0.32488	-0.03807	-0.01239	-0.11035	0.10881	0.08005	-0.01089	0.03248	0.14872	0.33261	0.59149	0.0018	0.38448	-0.04002	0.27752	0.13676	0.01748	-0.08859	0.10877	0.11768	0.07946	0.52339	0.07127	0.02273	-0.04182	-0.05107	0.04788	-0.04655	0.20528	0.00281	-0.01536	0.04258	0.21647	0.02605	0.35454	0.22569	-0.03287
-1	0.19783	0.34941	0.41589	0.32053	0.20007	-0.07418	0.63802	0.18019	0.32075	0.22348	0.18397	-0.02253	0.66274	0.05928	0.0374	0.07957	-0.0095	0.00335	0.03366	0.01514	0.03577	0.68346	0.762	0.04582	0.12304	-0.00961	0.42295	0.16969	0.17335	-0.07435	0.04511	-0.01711	0.33142	0.67958	0.10354	0.31261	0.15714	-0.03364	0.1107	0.34039	0.05764	-0.02996	0.04262	0.09083	0.22944	0.02561	0.15297	0.0399	0.07884
-0.9	0.33984	0.54668	0.54962	0.21606	0.33685	-0.08711	0.98478	0.35061	0.62952	0.18291	0.24875	0.12136	0.55581	0.14247	0.31545	-0.06256	0.00295	-0.04341	0.13845	0.02761	0.42823	0.96417	0.78388	0.12908	-0.07021	0.03182	0.1445	0.04778	0.16507	0.04618	-0.04214	0.03515	0.17613	0.2568	0.03936	0.37417	0.21176	-0.04764	0.20743	0.05402	-0.04148	-0.0472	-0.02145	0.25678	0.26539	0.09051	0.1211	0.24116	0.10942
-0.8	0.25669	0.76812	0.54188	0.45285	0.43891	-0.09997	0.95397	0.32276	0.67634	0.16856	0.72102	0.16737	1.15958	0.07232	0.3616	0.06013	-0.03113	0.07382	0.21458	-0.00243	0.15898	0.74762	0.90885	0.1302	0.02542	0.05595	0.21474	0.16776	0.15626	0.28025	-0.03681	0.01424	0.24728	0.59591	0.03452	0.08737	0.12459	0.10983	0.08793	0.76635	-0.01196	0.0563	-0.06324	0.34172	0.53022	-0.07639	0.39414	0.13509	0.07594
-0.7	0.4564	0.52868	0.56697	0.42984	0.47387	-0.02899	0.75562	0.26482	0.5645	0.35317	1.39779	-0.08097	1.03146	0.16804	0.28	-0.02907	0.12923	0.07268	0.34952	0.00771	0.16103	1.25434	0.98463	0.0593	0.08247	0.21775	-0.02137	0.24882	0.02557	0.30359	0.03246	0.12339	0.04822	0.42668	0.1307	0.08194	0.17027	0.37294	0.35904	0.91588	0.04405	0.18362	-0.0584	0.50322	0.91876	-0.05695	0.61701	0.01478	0.18901
-0.6	0.35894	0.69273	0.65895	0.54098	0.46659	0.032	0.73745	0.36356	0.83141	0.40365	1.79383	0.12414	1.10765	0.39081	0.35699	0.05501	0.21976	0.23922	0.32429	-0.04758	0.35561	0.56103	0.58743	0.17211	0.15558	0.0919	0.12561	0.28644	0.02655	0.45276	0.03812	0.2935	0.14602	0.16543	-0.02778	0.19035	0.49316	0.75868	0.11333	1.43556	0.08506	0.25224	0.0043	0.36093	1.21446	0.00031	0.67266	0.19135	0.29637
-0.5	0.26754	0.70023	0.69748	0.65493	0.72572	0.116	0.6846	0.11638	0.727	0.58345	2.23035	0.24984	0.81627	0.08181	0.79313	0.09697	0.53134	0.92956	0.18626	0.0104	0.52838	0.4376	0.38039	0.10649	0.15456	0.16361	0.3474	0.48247	0.05894	0.2796	0.03199	0.18571	0.37213	0.63525	0.05521	0.91358	0.98338	0.84485	0.71504	1.65144	0.04493	0.29288	0.27092	0.56796	1.96857	-0.04202	0.58345	0.51358	0.33405
-0.4	0.31821	1.06696	1.05937	0.74448	0.62977	0.17848	0.62888	0.43425	0.57606	0.79855	1.4718	0.98422	0.63853	0.23496	0.59425	0.44073	0.40388	0.73295	0.17283	0.02483	0.94105	0.49277	0.79414	0.25194	0.15908	0.27998	0.46974	0.63176	0.24702	0.46794	0.05133	0.18513	0.30735	1.04956	0.38031	0.74364	1.42004	1.12339	0.75212	1.93997	0.08648	0.1753	0.64166	0.72135	2.16572	0.11992	0.61501	0.12747	0.25258
-0.3	0.78527	1.00131	0.88441	0.78808	0.74798	0.59172	0.79738	0.49409	1.02717	1.37729	2.00185	1.50834	0.60523	0.57273	0.44614	0.54073	0.20795	1.3634	0.43534	0.07303	1.20524	0.90116	1.24925	0.44649	0.40908	0.60326	0.73182	0.67779	0.43856	0.66449	0.17972	0.40445	0.63452	1.21545	0.19917	1.05143	1.10789	1.25127	1.14257	2.71866	0.1339	0.32953	0.58551	1.24109	1.79007	0.06191	0.71062	0.03594	0.29614
-0.2	1.03996	1.18636	0.9066	0.52695	0.88996	1.0171	0.58791	0.46179	1.13964	1.66775	2.62765	1.66909	0.68767	0.7714	0.66464	0.55943	0.3777	1.5783	0.37347	0.34173	1.77891	1.28829	1.3673	0.32739	0.32801	0.65919	0.71619	0.9234	0.37387	0.75851	0.65545	0.52183	0.89973	0.90136	0.4305	1.15162	0.97331	1.51548	1.76211	3.24477	0.57709	0.60354	0.5567	1.01661	2.01823	0.19513	0.61505	0.39426	0.47826
-0.1	1.47139	1.10227	0.97793	0.97658	0.83949	1.85139	0.89443	0.31925	0.88192	1.57123	2.80456	2.11496	0.75518	0.60048	0.9303	1.23199	0.46088	1.98159	0.39937	0.3065	1.88911	1.71105	1.44084	0.75157	0.3513	0.63737	0.78409	1.34769	0.8281	0.80188	0.88162	0.64365	1.24738	1.12463	0.77454	1.15589	0.88992	1.50545	1.86593	3.66511	0.70515	0.68833	0.73106	1.36457	2.13339	0.14705	0.20238	0.24309	0.45829
0	1.32756	1.16993	0.86154	0.86696	1.4367	1.57016	1.53429	0.17864	0.84939	2.14263	1.95453	2.33592	1.28257	0.81455	0.99629	0.72158	0.45811	1.41987	0.26121	0.23712	1.46936	1.54139	1.56685	0.53142	0.79465	0.74559	0.71318	1.31979	1.14777	0.35909	1.12135	1.09186	1.29272	1.46772	0.71899	1.57004	1.14427	1.04488	2.44204	3.78728	1.44736	0.38297	0.98377	1.41776	2.48738	0.18848	0.94755	0.24423	0.45857
0.1	1.67758	1.57375	0.89914	0.70767	0.88037	1.37359	0.69122	0.52278	0.95811	2.27962	2.08267	1.97883	1.52619	0.77556	0.8181	0.93117	0.53482	2.52683	0.25503	0.22041	1.32501	1.98491	1.80666	0.85232	0.96809	0.5069	0.72681	1.518	0.50162	0.18657	1.01225	0.68493	1.60551	1.15275	0.71749	1.94015	1.27343	1.36403	2.35278	3.74083	0.90891	0.64106	1.25161	1.23034	2.14467	0.44776	0.74932	0.33233	0.84006
0.2	1.70777	1.60479	0.86161	0.67309	0.70663	1.60397	0.81695	0.65657	0.98418	1.47968	2.43841	1.6787	0.79453	0.33937	0.49312	0.21695	0.38278	1.59505	0.46905	0.12886	1.16671	1.69932	1.87557	0.45058	0.3435	0.60517	0.76335	1.412	0.46021	1.02793	0.41675	0.75837	1.80168	0.99153	0.54278	1.598	1.15403	1.52548	1.44518	3.25126	0.58935	0.21056	1.03863	1.34355	1.48623	0.37554	0.44999	0.19801	0.92766
0.3	0.89801	1.02088	0.80473	0.77248	0.51218	1.03847	0.92976	0.23192	0.68645	1.14785	2.12674	1.76652	0.63862	0.36831	0.42745	0.3602	0.14295	1.21662	0.43716	0.13632	1.41783	1.02434	1.48963	0.48971	0.37051	0.56548	0.58436	1.02073	0.26644	0.62303	0.21633	0.32977	0.86874	0.89336	0.28463	0.5426	0.86097	0.84905	1.2906	2.55852	0.24761	0.38231	0.96505	0.86821	1.20542	0.19207	0.33651	0.41218	0.52278
0.4	0.55562	0.68268	0.91051	0.89615	0.62504	0.83379	0.82824	0.27057	0.59714	0.66629	2.11719	1.3884	0.70409	0.57205	0.4911	0.35315	0.43782	1.00788	0.42847	0.19278	0.97291	1.11615	1.11206	0.31349	0.41544	0.32565	0.42969	0.68028	0.1185	0.10398	0.11565	0.12502	0.82604	1.37265	0.47228	0.92765	0.65316	0.34842	0.89325	2.16276	0.31817	0.56374	0.73732	0.445	1.19609	0.1818	0.38819	0.2083	0.39344
0.5	0.09764	0.46135	0.69504	0.42228	0.95499	0.79861	0.58102	0.06922	0.48105	0.32787	1.6432	1.12769	0.73216	0.29608	0.60418	0.7463	0.43072	0.86746	0.26297	0.15597	0.49048	0.82289	1.01754	0.46301	0.2539	0.19738	0.14481	0.41932	0.08486	0.02105	0.07201	0.36538	0.88124	0.64771	0.49988	0.39214	0.7418	0.25572	0.97868	2.01601	0.10396	0.585	0.32206	0.39265	1.52122	-0.03452	0.46197	0.30221	0.28285
0.6	0.24056	0.55361	0.43752	0.20643	0.33693	0.47539	0.50489	0.0226	0.23845	0.37539	1.06041	0.94643	0.52398	0.10237	0.46526	0.30518	0.22339	1.64402	0.03655	0.06777	0.37913	0.90356	1.21722	0.31162	0.09324	0.17247	0.20666	0.1888	0.12023	-0.02919	0.09049	0.2791	0.80212	0.63616	0.41557	0.29159	0.1838	0.17627	0.69138	1.25812	0.07356	0.23818	0.40904	0.25293	1.17641	-0.0284	0.7016	0.14312	0.16987
0.7	0.1762	0.1451	0.17878	0.22031	0.26677	0.39694	0.68254	0.02556	0.0492	0.15457	0.73803	0.34389	0.34421	0.05425	0.41054	0.24091	0.01998	1.04385	0.1773	0.086	0.16947	0.74888	1.26116	0.56623	0.01963	0.35416	0.18008	0.08181	0.09583	0.02225	0.05381	0.34566	0.7334	0.38147	0.40715	-0.02476	-0.04369	0.17281	0.72775	0.89823	0.08243	0.25151	0.39483	0.46128	0.47303	-0.01394	0.51756	0.03746	0.29539
0.8	-0.04637	0.14607	0.12944	0.25343	0.17921	0.29171	0.85048	0.01511	0.19526	0.00718	0.88018	0.17996	0.18576	0.01941	0.58431	0.08319	0.00635	0.91208	0.18889	0.13596	0.00977	0.6073	1.24224	0.30997	0.09949	0.0273	0.12523	-0.0368	-0.02305	0.0372	0.03511	0.08687	0.52409	0.42799	0.68634	-0.08485	0.05387	0.23982	0.80477	0.56168	-0.08184	0.33932	0.33918	0.36842	0.5156	-0.03985	0.47423	-0.02877	0.16232
0.9	0.17741	0.23506	0.15933	0.32535	0.31159	0.18708	0.2884	-0.03082	0.083	0.04977	0.79027	0.50068	0.12667	0.11678	0.42157	-0.01061	-0.00281	0.66984	0.12352	0.0915	0.14199	1.54245	0.91944	0.3649	0.09607	-0.04209	-0.07468	0.02375	-0.09427	0.15199	0.00252	0.06137	0.55614	0.16949	0.32337	-0.10431	0.12759	0.11956	0.79964	0.34169	0.26165	0.55971	0.26122	0.14207	0.2198	0.15163	0.02924	-0.02702	-0.00977
1	-0.05346	0.22596	0.19663	0.15355	0.13534	0.17054	0.48562	-0.00871	0.02423	0.13766	0.25277	0.63294	0.30279	0.02325	0.09974	0.02515	0.0592	0.55328	0.0901	0.01787	0.12779	0.14067	0.61361	0.24693	-0.04678	0.11433	0.02285	0.05472	-0.04784	0.05147	0.0049	0.11335	0.34658	0.04561	0.44544	0.22352	0.10492	0.30662	0.89804	0.26249	-0.02481	0.41294	0.10278	0.20818	0.15576	0.02255	0.05197	-0.07934	0.02676
1.1	0.01982	0.27092	0.25346	0.06221	0.02678	0.18074	0.49295	0.05461	-0.05629	0.07281	0.50492	0.38054	0.02027	0.08251	-0.03566	0.09809	0.09777	0.85788	0.00997	-0.02092	0.12622	0.28901	0.69533	0.14667	-0.031	0.16358	0.09981	0.03725	-0.06692	0.07794	0.08261	0.0791	0.13346	0.04183	0.61635	0.00965	0.04219	0.1995	0.66233	0.28426	0.17309	0.37301	0.10354	0.09598	0.00972	-0.04224	0.20179	0.03118	0.02638
1.2	-0.05813	0.21152	0.12468	0.08097	-0.07125	0.30929	0.40758	-0.01032	-0.02559	-0.0218	0.46207	0.19556	-0.00023	0.10809	0.02104	-0.01103	0.03501	0.75304	0.04653	0.02641	0.0416	0.21362	0.66238	0.24543	-0.05685	0.2281	0.10551	-0.00073	-0.07998	0.06149	0.04181	0.03307	0.31354	0.07461	0.1739	-0.04833	0.08778	-0.02504	0.70536	0.43159	0.4433	0.62803	0.26275	0.0434	-0.09875	0.00236	0.20031	-0.03879	-0.01384
1.3	-0.09419	0.04563	0.23776	0.20048	0.03548	0.39703	0.07175	-0.08215	0.09535	0.05304	0.48544	0.07775	-0.02076	0.08004	-0.07645	0.08019	0.0309	0.33181	0.09702	0.08867	0.00104	0.1472	0.48501	-0.02508	-0.07188	0.21787	0.05811	0.06336	0.0942	-0.04577	0.00756	-0.05262	0.31511	0.23947	0.02356	-0.05497	0.21948	-0.04627	0.71105	0.01801	1.44718	0.30954	-0.03801	0.14982	-0.04227	0.04843	0.07341	-0.02164	-0.04117
1.4	-0.00473	0.22375	0.06116	0.03108	0.03912	0.38559	0.09278	-0.08698	0.00716	0.0306	0.28569	0.24634	-0.09333	0.21308	-0.09774	0.01101	-0.00146	0.20137	0.20307	0.05824	-0.05849	0.19682	0.58625	0.00127	0.00219	0.05181	0.04916	-0.00641	0.22217	-0.07315	0.07617	-0.00076	0.13259	0.24793	-0.00493	0.10847	0.10987	-0.0595	1.21577	0.34597	0.76027	0.29575	-0.00644	0.13606	-0.06135	-0.1042	0.04121	-0.08395	-0.06389
1.5	0.00479	0.03217	0.10584	-0.08136	-0.04043	0.46395	0.23068	-0.05947	0.16876	0.00085	0.29814	0.15965	-0.0373	0.07566	-0.07742	0.12172	-0.01548	0.47436	0.05628	-0.04949	-0.0123	0.08878	0.65773	-0.0411	0.1042	0.09316	0.0075	0.01122	-0.03603	-0.01703	-0.00421	0.04759	0.30525	0.14716	0.15336	0.02151	0.09377	-0.02389	0.73965	0.10055	0.49663	0.1641	0.06033	-0.00032	-0.0568	0.03248	-0.01376	-0.10741	-0.05151
[truncated: 38 more columns]

## Sheet: 2C
Data related to Figure 2C: FT1117 signal density
FT1117 density (A.U.)	GFP(+)			GFP(-)
	control	GPR55 KD	Cas9 alone	control	GPR55 KD	Cas9 alone
bouton #1	1.26283	0.32008	1.5255	3.04562	1.28664	2.5478
#2	1.08122	0.82062	1.4587	1.47068	1.42529	1.04803
#3	0.77284	0.80556	2.5137	0.701	1.23709	2.78542
#4	1.58737	0.32996	0.89921	0.5164	1.11013	2.55944
#5	3.09361	0.91976	2.45997	0.76155	0.98018	2.2228
#6	2.03954	0.4131	1.57814	0.28289	1.13893	2.28833
#7	1.24932	0.66403	1.02401	0.76408	1.15282	1.33675
#8	1.66303	0.29541	0.57306	0.94333	2.4385	2.06775
#9	1.15341	0.35695	1.31437	0.59946	1.01019	2.7683
#10	1.14663	0.54098	1.32531	0.11347	0.77704	1.61774
#11	1.22755	0.23999	2.28866	3.08295	0.73119	1.09665
#12	1.33154	0.20884	0.93871	0.57588	0.97339	1.85706
#13	1.22616	0.7593	1.29641	0.48415	0.67868	1.64801
#14	1.05086	0.23944	1.0241	2.17002	0.70773	2.06931
#15	0.7135	0.85322	1.25455	0.49045	1.27061	1.46809
#16	1.14068	0.08195	1.24571	1.02128	1.41557	0.81811
#17	0.93239	0.45073	1.13369	3.20787	1.15282	3.01514
#18	1.0482	0.18128	1.01471	0.89309	1.11117	2.17535
#19	1.51262	0.53025	1.43359	0.26733	1.47156	1.54623
#20	1.0076	0.79765	1.05172	0.25302	1.23064	0.93806
#21	1.03399	0.28391	1.63305	0.38565	2.02499	0.50012
#22	0.87988	0.58987	1.29331	0.21596	0.97039	0.96331
#23	1.19985	0.26873	1.09978	1.43318	1.51732	1.55465
#24	1.20607	0.5718	0.96544	2.94683	0.80415	2.00173
#25	1.09373	0.60327	1.45525	1.83574	2.51012	1.68626
#26	0.82222	0.3307	1.03438	1.10149	0.62776	1.19413
#27	1.08859	0.47899	1.54834	2.42884	0.88321	1.00384
#28	0.80893	0.7333	1.54777	0.30009	0.6071	1.87769
#29	0.52649	0.48361	2.69562	2.6279	1.42836	2.56783
#30	1.83886	0.39992	0.65073	0.78115	1.06347	2.43523
#31	1.05593	0.55182	0.67302	1.96611	1.6892	0.7214
#32	0.4704	0.44487	1.38416	0.91657	0.76739	2.04672
#33	0.92529	1.05337	1.09415	0.77122	0.65372	1.47986
#34	1.12302	0.34671	1.31756	1.28084	2.95462	1.9748
#35	1.0167	0.6044	1.30504	0.59033	0.57051	1.59525
#36	0.92453	0.33987	2.22176	0.99378	1.86305	1.195
#37	0.95076	0.60644	1.99754	1.37539	1.36913	2.99247
#38	0.94544	0.92149	0.36151	0.27778	0.69277	0.50689
#39	1.45305	0.49156	1.07389	1.5808	0.41088	0.98971
#40	0.83215	0.85894	1.2755	3.14013	0.82091	1.22616
#41	1.40493	0.81775	0.74687	4.00573	1.1315	0.86108
#42	0.96535	0.88348	1.52678	1.02317	1.25004	1.04002
#43	1.42256	0.43775	2.10521	2.22887	1.20807	0.96955
#44	1.64053	0.90719	1.28173	1.31755	1.15073	1.47874
#45	1.10924	0.61644	1.25493	2.54956	1.34469	1.14571
#46	0.95819	0.38428	0.34496	1.58986	0.78659	1.06445
#47	0.66022	0.85102	1.55688	0.63224	0.17738	0.76996
#48	0.46454	0.5953	0.66497	0.21882	0.56191	0.90429
#49	0.82151	0.28702	1.11401	1.15724	0.77046	1.0218
#50	0.81585	0.60611	1.41002	1.55539	0.50114	0.98079
#51	0.78206	0.66138	0.82268	0.76586	1.68608	1.18136
#52	1.71393	0.804	1.88978	2.61307	1.77512	0.60742
#53	0.85661	0.84846	0.7806	1.57215	0.63699	0.87413
#54	0.63218	0.27785	0.87906	1.73053	1.49846	0.79691
#55	0.76692	1.02452	0.73587	0.57463	0.78002	0.63178
#56	0.66874	0.43897	2.19893	0.23886	0.83749	0.65185
#57	0.26731	1.10076	0.5635	0.78375	0.91546	0.66585
#58	1.8679	0.85995	0.85293	2.09406	1.23529	0.63409
#59	1.7246	0.38906	3.18427	0.21353	0.97881	0.74014
#60	1.98235	0.37001	0.91184	1.24739	1.19435	1.12809
#61	1.79491	0.28656	0.93386	0.5445	1.30293	1.27813
#62	0.93588	0.66098	1.01794	0.94335	2.41542	0.67197
#63	1.51864	0.23928	1.49259	1.14594	0.71188	0.68642
#64	0.8588	0.96659	1.02681	0.82495	1.46802	0.87905
#65	1.17172	1.20577	1.41243	0.63392	1.42534	1.17153
#66	0.83786	0.5154	1.8359	1.40712	1.32531	0.5753
#67	1.71821	0.66781	1.33328	1.2081	0.54852	0.64586
#68	2.30395	0.05417	1.62295	0.23396	0.96864	0.94208
#69	1.99533	0.15237	0.70991	0.62907	1.11175	0.96559
#70	2.77087	0.35192	0.57986	0.3883	0.43951	0.47898
#71	0.76722	0.52713	0.56786	0.44708	1.10463	1.1068
#72	1.64735	0.47944	1.05231	1.13857	2.44952	0.41214
#73	1.44226	0.48774	1.08855	2.52593	2.19138	1.00682
#74	1.88487	0.15548	0.76459	0.32911	0.76787	0.87687
#75	2.10027	0.58779	1.10906	0.47278	0.58017	0.91635
#76	2.10144	0.34535	1.01204	0.75787	1.42819	1.51688
#77	1.50795	0.15794	1.43924	1.29739	1.35866	1.07725
#78	0.95462	0.29532	0.97723	0.47877	2.51098	0.56966
#79	1.10163	1.12922	1.79253	0.65014	2.26571	1.39365
#80	2.28215	0.53295	1.22849	0.60761	0.70073	3.19864
#81	1.13356	0.63848	1.71317	1.17315	0.63569	0.23547
#82	1.06443	0.35555	1.83345	3.06812	0.77218	3.0493
#83	1.79192	0.72319	0.94714	1.61937	0.56929	0.80873
#84	2.24573	0.40861	1.03321	0.96391	2.31755	1.77217
#85	2.00638	0.32161	1.19883	1.15365	0.76484	1.50798
#86	1.46617	0.5879	1.40731	1.60033	1.64133	0.33128
#87	0.69079	0.51807	1.0883	0.88192	0.87658	0.89988
#88	1.17501	0.06855	1.21926	1.71467	0.25223	0.52067
#89	0.78001	0.39336	1.2101	1.02799	0.58967	1.08069
#90	1.26339	0.28446	0.56295	1.70562	1.07436	1.40016
#91	1.45251	0.38763	0.4826	0.83705	0.36345	1.07488
#92	1.66199	0.42858	0.79593	2.55021	0.70559	0.48964
#93	1.38626	0.24936	0.67801	1.32371	1.50639	0.20918
#94	1.26145	0.43459	0.76964	1.68612	0.92382	1.46983
#95	1.1677	0.79418	1.10287	3.05663	0.74289	0.44537
#96	1.56406	1.39978	1.18234	0.60939	0.64509	1.16577
#97	0.76415	0.33599	0.78078	2.66454	1.32685	0.24769
#98	1.27304	0.48494	1.74625	1.63977	0.60331	0.78162
#99	1.15509	0.32327	0.89122	0.79263	0.74496	1.49198
#100	0.93136	1.31829	0.63737	2.14521	1.56869	1.05354
#101	0.80738	0.12429	0.871	1.39615	0.34365	0.93213
#102	2.13479	0.82977	1.46484	0.81366	0.43032	1.6534
#103	0.76081	0.23973	0.88995	0.45843	0.37743	1.87705
#104	1.62865	0.9692	1.37367	0.21523	0.90206	0.88889
#105	1.87251	0.39555	0.75808	0.45268	0.932
#106	1.26931	0.72149	0.52723	0.45504	1.05299
#107	1.30946	0.93151	1.33568	0.16407	1.14211
#108	0.74794	0.28696	0.8233	0.21111	1.77119
#109	1.21737	0.75083	0.78127	0.19646	0.40243
#110	1.65461	0.98855	1.45388	0.53145	2.2827
#111	0.72562	1.16329	1.0969	0.1757	0.40357
#112	1.53015	1.19249	0.68668	0.28765	2.24034
#113	1.2613	0.98449	0.9233	1.24856	1.16604
#114	1.63056	0.66013	0.47452	2.49322	1.02675
#115	1.13168	0.928	1.19687	0.4075	0.34826
#116	0.58167	0.54667	0.75162	0.88805	1.31696
#117	1.43024	0.12456	0.94786	0.27934
#118	1.65381	0.67011	1.25628	0.43088
#119	1.6039	0.28789	0.64483	0.86726
#120	0.86173	0.22923	1.21774	1.97797
#121	1.10963	0.39338	1.30794	3.19038
#122	1.17164	0.4031	0.66532	1.84292
#123	1.30852	0.55	0.83567	0.56953
#124	2.65178	0.38948	0.47267	1.24185
#125	1.30422	0.42054	0.70681
#126	1.37375	0.28483	0.41897
#127	0.71783	0.53445	0.55241
#128	1.39318	0.34688	0.54237
#129	0.32029	0.23476	0.28774
#130	1.19029	0.32915	0.75713
#131	1.20747	0.36955	0.84777
#132	0.62687	0.3691	0.39985
#133	0.95367	0.38482	0.50207
#134	0.69936	0.54518	0.49113
#135	2.34496	0.36328	0.58881
#136	0.73544	0.53528	0.58657
#137	1.59447	0.51761	0.66571
#138	1.80351	0.20061	0.3818
#139	1.31373	0.56473	0.23982
#140	1.26532	0.61272	0.61079
#141	1.22481	0.33698	0.20203
#142	1.69886	0.32124	0.57399
#143	0.49822	0.77048	0.62873
#144	1.36747	0.31404	0.67325
#145	1.89469	0.33827	0.32437
#146	1.28438	0.32122	1.27079
#147	0.6303	0.40415	1.15225
#148	1.39974	0.29378	0.83884
#149	1.64492	0.16621	0.66949
#150	0.77253	0.60208	2.32367
#151	1.73679	0.5014	0.4174
#152	0.63419	0.57603	1.46833
#153	1.19502	0.37264	0.87765
#154	0.90413	0.496	1.81821
#155	0.8728	0.35663	0.39159
#156	0.93734	0.50474	1.08876
#157	2.0953	0.51252	1.02331
#158	1.99168	0.50186	1.16937
#159	0.66463	0.51973	1.23545
#160	0.77966	0.64574	0.6722
#161	1.87558	0.33426	1.1297
#162	1.13219		0.92792
#163	0.81829		0.78969
#164	1.29939		0.74218
#165	0.84153		1.16046
#166	1.97333		0.52378
#167	1.5498		0.69466
#168	1.47423		0.97814
#169	1.57394		1.33103
#170	1.56247		0.4229
#171	2.2127		0.65084
#172	1.92086		0.46249
#173	1.79647		0.54093
#174	0.61073		1.15551
#175	1.44592		1.44501
#176	1.16808		0.85874
#177	0.84802		1.33491
#178	0.77672		0.45806
#179	1.47983		0.84906
#180	0.6998		1.52002
#181	0.52431		1.12669
#182	1.0394		0.80071
#183	0.65669		0.77981
#184	0.91997		0.4363
#185	0.66685		0.27846
#186	1.06241		1.53291
#187	1.21501		0.63224
#188	1.19435		0.85911
#189	0.4896		1.88376
#190	0.74122		0.86224
#191	2.0819		0.92155
#192	1.11163		0.94188
#193	0.83636		1.18
#194	0.7129		1.10075
#195	1.57683		1.08195
#196	1.60611		1.11205
#197	0.7959		1.39206
#198	0.9774		2.0686
#199	1.0746		0.50192
#200	0.73077		0.88758
#201	0.52452		0.45765
#202	0.9831		0.58649
#203	0.68426		1.10631
#204	0.95447		0.71718
#205	0.81425		0.29998
#206	1.24453		2.17364
#207	1.5427		1.28971
#208	1.0147		1.57447
#209	0.64415		0.83092
#210	1.11482		1.08689
#211	0.83539		0.71354
#212	1.12129		0.96641
#213	1.8235		0.85351
#214	0.90092		0.82416
#215	1.22267		0.5235
#216	0.1967		0.86405
#217	0.88321		1.298
#218	1.0857		1.60578
#219	0.92146		1.30861
#220	0.35525		0.83743
#221	1.11765		0.94067
#222	0.34549		1.16216
#223	1.21836		0.70126
#224	2.21225		0.60662
#225	0.91691		1.51444
#226	0.57235		0.91929
#227	0.47483		0.82797
#228	2.0226		1.10725
#229	1.01477		0.83212
#230	1.37699		1.43562
#231	0.77171		1.33274
#232	0.76778		1.1375
#233	1.24924		0.73756
#234	0.46118		1.00405
#235	0.91699		1.59474
#236	1.40585		0.91251
#237	0.61047		0.72941
#238	1.23983		1.21734
#239	0.47737		0.57257
#240	1.67968		0.4378
#241	0.3202		0.74309
#242	0.21881		0.96674
#243	1.53239		1.08254
#244	1.37419		0.50188
#245	0.9095		2.10225
#246	1.35454		1.62409
#247	0.35511		1.0811
#248	1.41719		0.62311
#249	0.98272		0.49948
#250	0.38272		0.59406
#251	1.10832		1.11746
#252	1.08807		0.45395
#253	0.51414		1.16873
#254	0.57214		1.43651
#255	1.54824		0.51941
#256	1.02309		0.81855
#257	0.55624		0.78831
#258	0.53606		0.34108
#259	1.4947		0.91651
#260	0.33565		0.74651
#261	1.31273		1.22506
#262	0.69305		0.63902
#263	0.25905		0.62053
#264	0.82963		1.69224
#265	1.0208		1.0811
#266	0.66787		1.11512
#267	0.75451		1.71077
#268	1.25319		0.3504
#269	0.58252		1.16216
#270	1.67894		0.8266
#271	1.22532
#272	1.30137
#273	0.96395
#274	1.01853
#275	0.94179
#276	1.29329
#277	0.5357
#278	0.4386
#279	0.30841
#280	0.13114
#281	0.60379
#282	0.17873
#283	0.54784
#284	0.30576
#285	0.27477
#286	0.32995
#287	1.26396
#288	0.95353
#289	0.43121
#290	0.51604
#291	0.96979
#292	0.35198
#293	0.59406
#294	0.69544
#295	0.36556
#296	0.18011
#297	0.27174
#298	1.22019
#299	0.74217
#300	0.50514
#301	0.82631
#302	0.94908
#303	0.76729
#304	0.56752
#305	0.93927
#306	0.62026
#307	0.14847
#308	0.5572
#309	1.2067
#310	0.44393
#311	0.62203
#312	0.52068
#313	0.26052
#314	0.90824
#315	0.64098
#316	0.72901
#317	0.39867
#318	1.01035
#319	0.3299
#320	0.33214
#321	1.375
#322	0.42394
#323	0.46851
#324	1.36771
#325	0.93774
#326	0.19328
#327	1.85182
#328	0.32038
#329	0.60187
#330	0.4377
#331	0.42461
#332	0.29443
#333	0.25913
#334	0.44918
#335	0.66589
#336	0.66183
#337	0.57731
#338	0.91879
#339	0.71381
#340	0.63031
#341	1.05162
#342	0.97092
#343	0.83745
#344	1.15034
#345	0.63947
#346	0.83072
#347	1.08932
#348	1.10762
#349	0.45276
#350	1.49477
#351	0.88585
#352	0.76569
#353	0.51998
#354	0.34066
#355	0.95617
#356	1.27103
#357	0.59194
#358	0.72351
#359	0.39797
#360	0.45694
#361	0.84904
#362	1.5762
#363	0.79618
#364	0.39721
#365	1.0853
#366	1.9382
#367	0.10263
#368	0.42102
#369	1.59161
#370	0.63726
#371	0.83431
#372	0.80469
#373	0.74035
#374	0.76166
#375	0.71946
#376	0.53548
#377	0.78554
#378	0.59806
#379	0.85525
#380	0.16802
#381	0.8179
#382	1.52955
#383	0.70152
#384	1.07407
#385	0.42053
#386	1.44441
#387	0.70437
#388	0.68538
#389	0.45405
#390	0.66557
#391	0.88548
#392	0.62406
#393	0.64764
#394	1.09835
#395	0.95951
#396	1.15074
#397	0.80205
#398	1.40295
#399	0.73456
#400	0.56824
#401	0.60428
#402	1.3765
#403	0.68783
#404	0.39435
#405	0.43472
#406	0.93351
#407	1.05717
#408	0.7868
#409	0.68785
#410	0.85517
#411	1.39637
#412	0.54354
#413	0.83596
#414	0.77697
#415	0.84083
#416	0.61311
#417	1.21922
#418	0.92558
#419	0.68777
#420	0.76765
#421	1.19579
#422	1.38484
#423	0.65472
#424	0.92416
#425	0.79747
#426	0.33902
#427	1.28971
#428	0.52107
#429	1.13346
#430	0.82675
#431	0.56392
#432	0.79094
#433	1.24802
#434	0.88352
#435	1.05329
#436	1.0798
#437	1.04858
#438	0.58285
#439	0.22762
#440	0.75563
#441	1.06238
#442	0.45091
#443	0.35065
#444	0.64192
#445	0.66849
#446	0.61334
#447	0.92934
#448	0.94098
#449	0.79002
#450	0.36562
#451	1.93198
#452	0.5984
#453	0.33678
#454	0.64862
#455	0.53896
N	455	161	270	124	116	104
Average	1	0.52642	1.03626	1.18048	1.11887	1.27205
SD	0.48815	0.26828	0.47402	0.86561	0.56975	0.68877
Results from Dunnet's test
GFP(+)
p_two_tail	GPR55 KD	Cas9 alone
compared with control	<1e-10	0.493
GFP(-)
p_two_tail	GPR55 KD	Cas9 alone
compared with control	0.538	0.737
