# Supplementary material for: Increased reluctant vesicles underlie synaptic depression by GPR55 in axon terminals of rat cerebellar Purkinje cells
Source: eLife. 2026 Apr 7;14:RP105268. doi: 10.7554/eLife.105268 (PMC13056361; doi:10.7554/eLife.105268)
Supplement: Figure 3—source data 1. [file elife-105268-fig3-data1.xlsx]

## Sheet: 3C
Data related to Figure 3C: ICa2+ amplitude and DCm befor and after application of AM251
ICa2+ amplitude (pA/pF)
Exp #	before	after AM251
1	74.9	80.9
2	59.2	54.8
3	42	39.3
4	58.9	50.9
5	44.3	50.8
6	38.8	37.8
N	6	6
Average	53	52.4
SEM	5.6	6.3
Results from paired t-test
(ICa2+ amplitude) before vs after AM251
p_two_tail	0.80831
DCm (fF/pF)
Exp #	before	after AM251
1	34	11
2	16	12
3	5	6
4	28	22
5	25	16
6	22	11
N	6	6
Average	22	13
SEM	4	2
Results from paired t-test
(DCm) before vs after AM251
p_two_tail	0.044779

## Sheet: 3E
Data related to Figure 3E: ICa2+ amplitude and DCm befor and after the AM251 application in transfected cells with Cas9-alone or CRISPR/Cas9 for GPR55
ICa2+ amplitude (pA/pF)
Cas9 alone			GPR55 KD
Exp #	before	after AM251	Exp #	before	after AM251
1	31.7	29.3	1	25.5	21.5
2	47.4	48.9	2	54.7	53.4
3	49.9	49.1	3	49.4	53.5
4	90.9	88	4	95	91.3
5	55.5	58	5	42.3	39.1
			6	73.5	69.2
N	5	5	N	6	6
Average	55.1	54.7	Average	56.7	54.7
SEM	9.8	9.6	SEM	10	9.8
Results from paired t-test
(ICa2+ amplitude) before vs after AM251
	Cas9 alone		GPR55 KD
p_two_tail	0.7119		0.17483
DCm (fF/pF)
Cas9 alone			GPR55 KD
Exp #	before	after AM251	Exp #	before	after AM251
1	27	14	1	21	14
2	27	13	2	22	18
3	28	12	3	34	29
4	29	17	4	17	15
5	31	19	5	14	16
			6	50	52
N	5	5	N	6	6
Average	28	15	Average	27	24
SEM	1	1	SEM	5	6
Results from paired t-test
(DCm) before vs after AM251
	Cas9 alone		GPR55 KD
p_two_tail	5.7165e-05		0.18541
