# Supplementary material for: Increased reluctant vesicles underlie synaptic depression by GPR55 in axon terminals of rat cerebellar Purkinje cells
Source: eLife. 2026 Apr 7;14:RP105268. doi: 10.7554/eLife.105268 (PMC13056361; doi:10.7554/eLife.105268)
Supplement: Figure 4—source data 1. [file elife-105268-fig4-data1.xlsx]

## Sheet: 4C
Data related to Figure 4C: amplitude and half-width of action potentials before and after the AM251 application
amplitude (mV)
Exp #	before	after AM251
1	82.7	81.5
2	116	108.3
3	85	85.4
4	73	74.3
5	99.1	102.4
N	5	5
Average	91.2	90.4
SEM	7.5	6.4
Results from paired t-test
(amplitude) before vs after AM251
p_two_tail	0.70099
half-width (ms)
Exp #	before	after AM251
1	0.69	0.7
2	0.48	0.49
3	0.41	0.42
4	0.7	0.7
5	0.41	0.38
N	5	5
Average	0.54	0.54
SEM	0.06	0.07
Results from paired t-test
(half-width) before vs after AM251
p_two_tail	0.83216

## Sheet: 4F
Data related to Figure 4F: normalized amplitude and frequency of mIPSC
	eIPSC amplitude (%)
Time (min)	Exp #1	#2	#3	#4		N	Average	SEM
-4	100.662	77.702	92.1518	83.3266		4	88.4607	5.03831
-3	81.8542	91.1501	121.828	96.6395		4	97.868	8.54971
-2	101.437	94.4536	107.153	97.6466		4	100.173	2.72968
-1	98.901	80.3006	126.785	96.6191		4	100.651	9.64562
0	100	100	100	100		4	100	0
1	92.1881	107.784	116.119	96.5165		4	103.152	5.43023
2	80.5219	102.367	100.66	88.6547		4	93.0507	5.17186
3	100.578	79.1257	104.491	89.7331		4	93.482	5.7134
4	90.2465	93.7174	109.733	89.4091		4	95.7764	4.74462
5	93.1743	113.107	121.416	78.4338		4	101.533	9.71565
Results from paired t-test
(mIPSC amplitude) at -1 vs 5 min
p_two_tail	0.94146
	CV of eIPSC (%)
Time (min)	Exp #1	#2	#3	#4		N	Average	SEM
-4	67.978	116.194	121.951	92.751		4	99.7185	12.3212
-3	96.1463	115.854	105.691	124.39		4	110.52	6.12881
-2	68.676	105.742	117.073	90.9525		4	95.6108	10.4501
-1	77.1156	105.226	102.439	100.899		4	96.42	6.49678
0	100	100	100	100		4	100	0
1	98.0488	90.6984	95.2845	99.1007		4	95.7831	1.87622
2	101.696	81.3969	90.5691	98.2015		4	92.9659	4.50201
3	106.564	72.0953	85.8537	97.3022		4	90.4537	7.4421
4	111.431	62.7938	81.1382	96.4029		4	87.9414	10.4165
5	116.298	53.4922	76.4228	95.5037		4	85.4292	13.4023
Results from paired t-test
(mIPSC frequency) at -1 vs 5 min
p_two_tail	0.60753

## Sheet: Figure 4-figure supplement 1
Data related to Figure S2: 20-80% risetime or half-width of mIPSCs before and after application of AM251
20-80% risetime (ms)
Exp #	before	after AM251
1	0.72	0.74
2	0.79	0.86
3	0.82	0.78
4	0.74	0.71
5	0.71	0.67
N	5	5
Average	0.76	0.75
SEM	0.02	0.03
Results from paired t-test
(20-80% risetime) before vs after AM251
p_two_tail	0.8266
half-width (ms)
Exp #	before	after AM251
1	6.18	7.48
2	5.77	5.64
3	7.15	7.56
4	8.43	8.06
5	7.25	6.76
N	5	5
Average	6.96	7.1
SEM	0.46	0.42
Results from paired t-test
(half-width) before vs after LPI
p_two_tail	0.68558
