# Supplementary material for: Increased reluctant vesicles underlie synaptic depression by GPR55 in axon terminals of rat cerebellar Purkinje cells
Source: eLife. 2026 Apr 7;14:RP105268. doi: 10.7554/eLife.105268 (PMC13056361; doi:10.7554/eLife.105268)
Supplement: Figure 5—source data 1. [file elife-105268-fig5-data1.xlsx]

## Sheet: 5B
Data related to Figure 5B: Amplitude and time constant of ICa2+
ICa2+ amplitude (pA/pF)
0.5 mM EGTA				5 mM EGTA
Exp #	control	Exp #	AM251	Exp #	control	Exp #	AM251
1	42.3	1	102.4	1	29.2	1	63.6
2	103.6	2	19	2	134.6	2	56.2
3	117.9	3	105.7	3	75.7	3	53.1
4	112.3	4	82.8	4	37.9	4	85.5
5	48.2	5	75.2	5	109.4	5	45.6
6	168.8	6	124.5	6	88.8	6	51.8
		7	111.8			7	51.8
						8	106
N	6	N	7	N	6	N	8
Average	98.9	Average	88.8	Average	79.3	Average	64.2
SEM	19.3	SEM	13.2	SEM	16.6	SEM	7.4
Results from ANOVA
ICa2+ amplitude
p_two_tail	0.4024
ICa2+ tau (ms)
0.5 mM EGTA				5 mM EGTA
Exp #	control	Exp #	AM251	Exp #	control	Exp #	AM251
1	1.7	1	1.33	1	2.21	1	1.08
2	1.13	2	2.36	2	1.24	2	1.52
3	1.61	3	1.63	3	1.13	3	0.74
4	1.05	4	0.6	4	2.07	4	1.84
5	1.13	5	2.07	5	1.92	5	0.89
6	1.54	6	0.74	6	1.06	6	1.09
		7	1.47			7	1.09
						8	1.18
N	6	N	7	N	6	N	8
Average	1.36	Average	1.46	Average	1.61	Average	1.18
SEM	0.12	SEM	0.24	SEM	0.21	SEM	0.12
Results from ANOVA
ICa2+ tau
p_two_tail	0.3394

## Sheet: 5C
Data related to Figure 5C: DCm upon depolarization pulses
0.5 mM EGTA
control
	DCm (fF/pF)
duration (ms)	Exp #1	#2	#3	#4	#5	#6				N	Average	SEM
1	1	1	2	1	8	3				6	3	1
2	3	9	10	7	15	7				6	9	2
5	14	27	9	21	17	36				6	21	4
10	12	38	13	25	18	39				6	24	5
20	15	34	15	28	23	44				6	27	5
50	19	31	18	40	22	53				6	31	6
0.5 mM EGTA
AM251
	DCm (fF/pF)
duration (ms)	Exp #1	#2	#3	#4	#5	#6	#7			N	Average	SEM
1	1	0	0	2	3	0	0			7	1	0
2	2	0	1	6	5	8	4			7	4	1
5	9	6	8	6	9	11	11			7	9	1
10	7	11	12	9	8	25	27			7	14	3
20	15	18	11	12	7	19	31			7	16	3
50	13	21	16	13	13	19	9			7	15	2
5 mM EGTA
control
	DCm (fF/pF)
duration (ms)	Exp #1	#2	#3	#4	#5	#6				N	Average	SEM
1	2	16	2	1	1	2				6	4	2
2	4	20	15	3	17	7				6	11	3
5	12	25	18	22	34	29				6	23	3
10	12	22	35	23	38	29				6	27	4
20	20	27	28	26	19	38				6	26	3
50	27	22	46	36	31	41				6	34	4
5 mM EGTA
AM251
	DCm (fF/pF)
duration (ms)	Exp #1	#2	#3	#4	#5	#6	#7	#8		N	Average	SEM
1	2	1	0	0	1	1	1	1		8	1	0
2	1	1	5	4	1	2	0	7		8	3	1
5	16	8	14	12	1	8	3	6		8	9	2
10	19	24	18	17	3	13	4	6		8	13	3
20	40	13	17	13	4	18	6	8		8	15	4
50	33	13	19	22	5	19	12	7		8	16	3
Results from Tukey-Kramer test
DCm upon 50 ms pulse
p_two_tail		0.5 mM EGTA		5 mM EGTA
		control	AM251	control	AM251
0.5 mM EGTA	control		0.028931	0.92808	0.043053
	AM251			0.0067645	0.99165
5 mM EGTA	control				0.0099416
	AM251

## Sheet: 5D
Data related to Figure 5D: ratio of DCm upon depolarization pulses
ratio of DCm (AM251/control)
duration (ms)	0.5mM EGTA	5mM EGTA
1	0.38312	0.22052
2	0.42136	0.23803
5	0.41492	0.3645
10	0.58336	0.48931
20	0.60614	0.55895
50	0.48437	0.47812

## Sheet: Figure 5-figure supplement 1A
Data related to Figure S3A: Amplitude and time constant of ICa2+
ICa2+ amplitude (pA/pF)
0.5 mM EGTA
Exp #	control	Exp #	AM251	Exp #	LPI	Exp #	AM251+LPI
1	42.3	1	102.4	1	157.7	1	76.5
2	103.6	2	19	2	85.5	2	106.3
3	117.9	3	105.7	3	87.5	3	116
4	112.3	4	82.8	4	97.7	4	82.8
5	48.2	5	75.2	5	66.1	5	22.4
6	168.8	6	124.5	6	15.4	6	108.3
		7	111.8
N	6	N	7	N	6	N	6
Average	98.9	Average	88.8	Average	85	Average	85.4
SEM	19.3	SEM	13.2	SEM	18.9	SEM	14.1
Results from ANOVA
ICa2+ amplitude
p_two_tail	0.9287
ICa2+ tau (ms)
0.5 mM EGTA
Exp #	control	Exp #	AM251	Exp #	LPI	Exp #	AM251+LPI
1	1.7	1	1.33	1	1.64	1	0.94
2	1.13	2	2.36	2	2.35	2	1
3	1.61	3	1.63	3	1.09	3	1.38
4	1.05	4	0.6	4	0.71	4	1.16
5	1.13	5	2.07	5	0.94	5	1.9
6	1.54	6	0.74	6	1.16	6	0.73
		7	1.47
N	6	N	7	N	6	N	6
Average	1.36	Average	1.46	Average	1.32	Average	1.19
SEM	0.12	SEM	0.24	SEM	0.24	SEM	0.17
Results from ANOVA
ICa2+ tau
p_two_tail	0.8167

## Sheet: Figure 5-figure supplement 1B
Data related to Figure S3B: DCm upon depolarization pulses
0.5 mM EGTA
control
	DCm (fF/pF)
duration (ms)	Exp #1	#2	#3	#4	#5	#6				N	Average	SEM
1	1	1	2	1	8	3				6	3	1
2	3	9	10	7	15	7				6	9	2
5	14	27	9	21	17	36				6	21	4
10	12	38	13	25	18	39				6	24	5
20	15	34	15	28	23	44				6	27	5
50	19	31	18	40	22	53				6	31	6
0.5 mM EGTA
AM251
	DCm (fF/pF)
duration (ms)	Exp #1	#2	#3	#4	#5	#6	#7			N	Average	SEM
1	1	0	0	2	3	0	0			7	1	0
2	2	0	1	6	5	8	4			7	4	1
5	9	6	8	6	9	11	11			7	9	1
10	7	11	12	9	8	25	27			7	14	3
20	15	18	11	12	7	19	31			7	16	3
50	13	21	16	13	13	19	9			7	15	2
0.5 mM EGTA
LPI
	DCm (fF/pF)
duration (ms)	Exp #1	#2	#3	#4	#5	#6				N	Average	SEM
1	4	1	1	7	0	0				6	2	1
2	11	5	2	8	4	1				6	5	2
5	19	4	2	6	6	6				6	7	3
10	18	8	7	21	9	15				6	13	2
20	26	8	8	32	10	15				6	17	4
50	17	14	10	20	15	23				6	17	2
0.5 mM EGTA
AM251 + LPI
	DCm (fF/pF)
duration (ms)	Exp #1	#2	#3	#4	#5	#6	#7	#8		N	Average	SEM
1	0	1	0	2	0	1				6	1	0
2	4	0	2	7	1	1				6	3	1
5	9	7	17	11	0	4				6	8	2
10	12	11	18	21	3	9				6	12	3
20	11	15	11	27	6	7				6	13	3
50	9	19	24	26	5	10				6	16	4
Results from Tukey-Kramer test
DCm upon 50 ms pulse
p_two_tail		0.5 mM EGTA
		control	AM251	LPI	AM251+LPI
0.5 mM EGTA	control		0.016736	0.048779	0.065749
	AM251			0.97809	0.97845
	LPI				0.99999
	AM251+LPI
