# Supplementary material for: Increased reluctant vesicles underlie synaptic depression by GPR55 in axon terminals of rat cerebellar Purkinje cells
Source: eLife. 2026 Apr 7;14:RP105268. doi: 10.7554/eLife.105268 (PMC13056361; doi:10.7554/eLife.105268)
Supplement: Figure 6—source data 1. [file elife-105268-fig6-data1.xlsx]

## Sheet: 6B
Data related to Figure 6B: ICa2+ and IPSC amplitude befor and after application of AM251
ICa2+ amplitude (pA/pF)
Exp #	before	after AM251
1	49.3	51
2	66.6	75.7
3	30.1	29.5
4	38.8	34.6
5	12.4	11.3
6	55.3	66.5
N	6	6
Average	42.1	44.8
SEM	7.9	9.9
Results from paired t-test
(ICa2+ amplitude) before vs after AM251
p_two_tail	0.33225
IPSC amplitude (nA)
Exp #	before	after AM251
1	0.266	0.056
2	5.666	3.995
3	3.424	2.117
4	4.805	1.616
5	0.483	0.128
6	0.794	0.348
N	6	6
Average	2.573	1.377
SEM	0.968	0.628
Results from paired t-test
(DCm) before vs after AM251
p_two_tail	0.044779

## Sheet: 6C
Data related to Figure 6C: maximal release velocity and synaptic delay before and after application of AM251
maximal release velocity (vesicles/ms)
Exp #	before	after AM251
1	4.7	1.4
2	125.8	72.8
3	63.5	37.3
4	58.4	26.6
5	7.9	3.6
6	14.1	6.3
N	6	6
Average	45.7	24.7
SEM	19.1	11.3
Results from paired t-test
(maximal release velocity) before vs after AM251
p_two_tail	0.046677
synaptic delay (ms)
Exp #	before	after AM251
1	2.47	3.57
2	1.82	1.95
3	1.29	1.45
4	1.2	1.34
5	1.25	2.06
6	1.72	2.13
N	6	6
Average	1.63	2.08
SEM	0.2	0.33
Results from paired t-test
(DCm) before vs after AM251
p_two_tail	0.040341
