# Supplementary material for: Increased reluctant vesicles underlie synaptic depression by GPR55 in axon terminals of rat cerebellar Purkinje cells
Source: eLife. 2026 Apr 7;14:RP105268. doi: 10.7554/eLife.105268 (PMC13056361; doi:10.7554/eLife.105268)
Supplement: Figure 7—source data 1. [file elife-105268-fig7-data1.xlsx]

## Sheet: 7C
Data related to Figure 7C: 400 APs-triggered pHluorin fluorescence changes before and after the AM251 application
rerative F	sec	bouton #1	#2	#3	#4	#5	#6	#7	#8	#9	#10	#11	#12	#13	#14	#15	#16	#17	#18	#19	#20	#21	#22	#23	#24	#25	#26	#27	#28	#29	#30	#31	#32	#33	#34	#35	#36	#37	#38	#39	#40	#41	#42	#43	#44	#45	#46	#47	#48
before	-10	1.00234	1.0293	1.02004	1.01427	1.01591	0.99121	0.99259	0.98668	1.00635	0.97707	1.02051	1.00151	0.98916	1.0189	1.01842	1.00292	1.03924	1.0136	0.99582	1.02393	1.00702	1.03444	1.01977	1.01795	1.0218	1.01451	1.00874	1.01869	1.02127	1.0162	1.02715	1.0021	1.00834	0.99791	0.99304	0.94926	0.97966	0.96875	1.06921	1.02377	1.00134	0.96716	1.03099	0.9382	1.00574	0.98333	0.99931	0.96717
	-9.5	0.99957	1.01255	0.99901	0.99897	1.00445	0.97821	0.98124	0.97966	0.9969	0.96528	1.01196	0.99621	0.9829	0.99529	0.99599	0.9983	1.03246	1.00239	0.99623	1.01645	1.00098	1.00611	1.00051	1.01076	1.01399	1.00686	0.99798	1.00914	1.01645	1.00203	1.02334	1.0016	1.00504	0.98032	0.99889	0.99382	1.01509	0.98707	0.99766	0.98897	0.95773	0.98807	0.96645	0.96679	1.03389	0.95224	1.04944	0.99789
	-9	0.99546	1.01729	1.01762	1.00332	1.00569	0.9786	0.98609	0.98626	0.99531	0.96422	1.01525	1.0005	0.98062	0.99838	0.99567	0.9992	1.02459	0.99958	0.9931	1.02767	0.99811	1.00698	1.00061	1.00802	1.00649	1.00288	1.00308	1.00737	1.01243	1.00762	1.02413	0.99917	1.00336	0.98996	0.98024	0.99652	1.0349	0.95423	1.06607	0.98914	0.94401	0.94535	0.99337	0.91822	1.0323	1.00103	0.97136	1.01443
	-8.5	0.99457	1.01407	1.01496	1.00324	0.99884	0.98798	0.98792	0.98217	0.99676	0.96253	1.01193	1.00497	0.98425	0.98991	0.98103	1.00022	1.03207	0.99863	0.98692	1.01969	0.99929	1.00594	1.00576	1.00714	1.00503	1.00586	1.00036	1.01061	1.00875	1.00654	1.02117	0.99927	1.00291	0.99337	0.98758	0.97986	1.04315	1.00389	1.04126	1.02048	0.98265	0.94191	0.91413	0.9463	1.03981	0.92687	1.05236	1.02266
	-8	0.99847	1.01059	0.99685	0.98559	1.00571	0.98648	0.99228	0.98103	0.99645	0.96248	1.01229	0.99725	0.98192	0.99335	0.98537	0.99421	1.01593	1.00709	0.99267	1.01899	0.99808	1.00489	1.00015	1.00967	1.00931	1.00977	1.00808	1.0063	1.01125	1.00204	1.01903	0.99725	1.00272	1.00129	1.03004	0.95978	1.01163	0.9433	0.94864	0.97572	1.00432	0.93298	1.02003	0.96179	1.02671	0.9804	0.9938	1.00887
	-7.5	1.00024	1.01866	1.00469	1.00001	1.0022	0.98553	0.99542	0.97865	1.0013	0.95901	1.01128	1.00162	0.97692	1.01009	0.98328	1.00804	1.02144	1.01524	0.97939	1.01995	0.9986	1.01029	1.00938	1.00467	1.01196	1.00092	0.99726	1.00471	1.01565	1.00081	1.02235	0.99919	1.00658	0.98536	0.98426	0.98781	0.97716	0.96096	1.03975	1.00464	0.98217	0.98487	0.97432	0.96646	1.01611	1.02292	0.96633	0.99244
	-7	0.99812	1.01574	1.00456	1.00571	0.99554	0.99322	0.99229	0.98394	0.99795	0.96162	1.00945	1.00557	0.98475	1.00365	0.97942	1.01527	1.02721	1.00858	0.99799	1.01057	0.99912	1.0071	1.01402	1.00921	1.01353	1.01267	1.00068	1.01068	1.02227	1.00845	1.02056	1.00053	1.00982	0.9805	0.98933	0.98336	1.00128	1.00515	0.90043	0.99496	0.99151	0.96817	1.00158	0.97469	1.07416	1.0065	1.00124	1.1024
	-6.5	1.0003	0.99893	1.00656	0.99473	0.99074	0.99789	0.9953	0.98974	0.99591	0.97133	1.01854	0.999	0.98165	1.01332	0.97945	0.99889	1.00253	1.01463	1.00898	1.01336	0.99744	1.01145	1.02132	1.01012	1.00861	1.00499	1.00608	1.00946	1.01374	1.00579	1.02089	1.00187	1.01016	0.98959	0.98695	0.97458	1.03043	0.95643	0.99107	1.00359	0.95402	0.98116	0.95619	1.01136	0.99084	1.00704	0.94831	1.01043
	-6	1.00612	1.00854	1.00281	1.00332	1.00577	0.9956	0.99586	0.98793	1.00098	0.9952	1.01146	1.0008	0.99293	1.0072	0.9909	1.0045	1.0074	1.00987	0.99382	1.0099	0.99729	0.99544	1.01073	1.00639	1.01215	1.004	1.0008	1.00605	1.01699	1.00178	1.01443	0.998	1.00454	1.00154	1.00221	0.96943	1.04273	0.96855	1.03406	0.99664	0.97417	0.98908	0.99255	1.0057	1.0331	0.98386	1.04889	1.00734
	-5.5	0.99594	1.00111	1.00157	0.99599	0.99753	0.99216	0.98894	0.99006	0.99783	1.01663	1.00426	0.99375	0.99209	1.00604	0.98783	0.99543	1.00493	1.00491	1.00129	1.01258	0.99482	0.99781	1.00924	1.01263	1.00385	1.00175	1.00355	1.00607	1.00578	0.99678	1.01276	1.00133	1.00272	0.99723	1.01842	1.02038	1.01223	0.95838	1.02437	0.96023	0.99398	0.9888	1.0358	1.01097	1.04916	0.99716	0.96366	0.97695
	-5	0.99708	0.99771	1.0047	0.99657	0.99625	0.99551	0.98975	0.99472	0.99854	1.00747	1.01213	1.00731	0.98799	0.99526	0.99065	1.00579	1.01534	1.00135	0.98962	1.00967	0.99106	1.00192	1.00618	1.005	1.00095	1	1.00544	1.00066	1.00837	0.9938	1.01169	0.99834	0.99606	0.9761	0.99082	0.9967	0.9567	0.95213	1.06944	0.96943	0.96931	0.95424	1.03488	0.97977	1.00741	0.98905	0.97529	1.01815
	-4.5	0.99677	1.00383	0.99719	1.0017	0.9993	0.99791	0.99326	0.99476	1.00191	1.00788	1.01045	1.00404	0.97657	0.99404	0.9944	1.00185	1.01548	1.00398	0.99877	1.00027	1.00097	1.00063	1.0005	1.00861	1.00403	1.00517	1.00181	1.00061	1.0061	0.99057	1.00655	0.99593	0.99673	0.9789	0.99886	0.98688	0.98234	0.9787	0.98933	1.02264	0.98697	0.99142	1.04237	1.01526	1.00497	1.00499	1.01049	1.0246
	-4	1.00447	1.00611	1.00199	1.00609	0.99777	1.00521	0.99822	0.9904	0.99667	0.98979	1.01007	0.9994	0.99486	0.9961	0.99275	0.99992	0.99572	1.00814	0.99823	1.00267	1.00107	1.00898	1.00193	1.00554	1.00314	1.00576	1.00683	1.00172	1.01038	1.00056	1.01511	1.00271	0.99695	1.0138	0.99381	0.98208	0.96216	0.96943	1.05519	0.99315	0.98202	0.94481	1.01935	0.95905	1.0399	0.98784	1.01771	1.03696
	-3.5	1.00036	1.0086	0.99201	1.00332	1.0006	0.99753	0.98949	0.99357	0.99904	0.99936	1.01093	0.99502	0.99031	1.00513	0.99486	1.00048	1.01956	0.99919	1.00202	1.00529	1.00078	0.9992	1.00238	1.00927	1.0083	0.99784	1.00278	1.00428	1.01253	1	1.01145	1.00077	0.99844	0.97331	1.00935	1.00025	0.99785	0.93614	1.00071	0.96429	0.99224	0.93788	1.03654	0.99983	1.02642	1.00443	1.00548	1.0108
	-3	1.0073	1.0082	0.99792	1.00061	0.997	0.99257	0.99639	0.9982	1.00197	1.0166	1.00623	0.99919	0.99685	1.00446	1.00502	0.99354	1.00064	0.9997	0.99839	1.01512	0.99475	1.00709	1.0091	1.01322	1.00518	1.00321	1.00098	1.0018	1.00781	0.99478	1.01534	1.00296	0.99936	1.00792	0.99179	1.03154	0.99225	0.9608	1.03911	0.98496	1.01515	0.96555	1.03392	0.94939	1.03892	0.99861	0.99354	1.03656
	-2.5	1.0019	1.0041	0.99975	1.00231	0.99282	1.0007	0.9904	0.99318	1.00468	0.99569	1.00684	0.9912	0.99286	1.0035	0.99071	1.00889	1.01333	0.99236	1.00128	1.00521	1.00864	1.00643	1.00666	1.01045	1.00278	1.00104	1.00109	1.00243	1.00938	1.00273	1.01168	1.00053	0.9966	1.01288	0.98989	0.98099	0.96642	1.00642	0.97446	0.98006	0.96626	0.98899	0.91676	1.00916	0.98525	0.98608	1.03376	0.95637
	-2	1.002	1.00882	0.99935	0.99951	1.00147	1.00574	0.99734	0.99011	0.99666	1.00642	1.00989	0.99078	0.98798	0.99996	0.99756	1.00483	1.00408	1.00035	1.00942	0.99511	1.00965	1.00147	1.01247	1.01265	1.01056	1.00301	1.00513	1.00171	1.01273	0.9994	1.01135	1.00263	1.00092	0.98487	1.01608	1.02039	1.02357	0.99796	0.96765	0.99266	1.01361	0.9837	1.03778	1.0227	1.021	1.028	1.01363	1.01757
	-1.5	1.0012	0.99763	1.00418	0.99636	1.00096	1.00296	0.98894	0.9941	1.00391	1.00799	1.00229	0.99967	1.00063	1.00385	0.99766	1.00334	0.99479	1.00544	0.99836	0.98762	1.00293	1.00181	1.00503	1.0041	1.00309	0.9984	1.00188	0.99618	1.00132	1.00117	1.00747	1.00309	1.0057	0.99799	0.99012	0.97456	1.0142	0.98457	1.02682	1.01836	1.0006	1.00182	0.98731	0.97678	1.03449	0.99722	0.99915	0.98273
	-1	1.00534	0.9971	1.01017	1.00453	0.99309	1.00218	0.99756	0.99713	1.00349	1.00283	1.00246	0.99733	0.99899	1.01329	0.99431	1.00932	1.00316	1.0029	1.00361	1.00289	1.00138	0.99672	1.005	1.00357	1.00364	1.00344	0.9984	0.9979	1.00835	1.00296	0.99766	1.00362	1.0044	0.99845	0.9981	1.01825	0.99	1.00524	1.02526	1.00311	1.01372	1.01969	1.05234	0.98555	0.95344	0.98288	0.94765	1.03751
	-0.5	0.99509	0.99647	0.99619	1.00053	0.99849	1.00036	1.00532	0.99926	1.00349	0.99675	1.00057	1.00392	0.99997	0.99016	0.99829	0.99268	0.99416	0.99523	1.00284	1.00723	0.99584	1.00685	1.0034	1.00389	1.0032	1.00132	1.00239	0.99845	0.9953	1.00139	1.00281	0.9981	0.99327	1.00406	0.994	1.03252	1.0107	1.01319	1.03963	1.02774	1.01235	1.02042	0.97237	1.0428	1.0464	1.00144	1.00802	1.02916
	0	1.00494	0.99577	0.99671	0.98087	0.99375	1.00111	0.98254	0.99032	1.00343	0.99491	0.9933	0.99367	0.98754	0.98368	0.99442	0.983	0.99001	0.98325	0.99076	0.98368	0.9919	0.99048	0.9969	0.99126	0.98927	0.99215	0.99504	0.9894	0.9933	0.99322	0.9929	0.99067	0.9937	0.98671	0.98079	1.01002	1.01254	1.02761	1.08757	0.96754	0.99921	0.97482	1.05647	1.01997	1.01017	0.9894	1.00075	1.00767
	0.5	1.00782	1.00277	1.00158	0.99707	1.00147	0.99679	0.99431	0.99615	1.00343	1.00385	1.00036	0.9973	1.0122	1.002	0.99629	0.99802	0.98303	0.99339	0.99059	0.98228	1.00988	0.99044	1.00518	0.99501	0.99193	0.99631	1.0039	0.99309	0.997	0.99132	0.99423	0.9918	0.99937	1.0041	0.99929	0.99565	1.01277	1.01129	0.94076	0.98571	0.96366	0.98396	0.94347	1.01831	1.01838	0.96888	1.0456	0.99482
	1	1.02143	1.00383	1.01127	1.02007	1.00236	1.01315	1.00797	1.01623	1.00325	1.02292	1.00226	1.00001	1.00637	0.98922	0.99987	0.99769	0.9947	0.99149	1.00039	1.00573	1.02585	1.00286	1.01359	1.00751	1.01077	1.00114	1.02611	1.00066	1.0169	1.00148	1.00419	0.99731	1.01381	0.99106	0.99645	0.98361	0.9497	0.98724	1.01413	0.99863	0.99406	0.98268	1.09355	1.03882	0.99401	0.97003	1.0525	1.03354
	1.5	1.02616	1.02159	1.02393	1.04684	1.03381	1.01726	1.0211	1.02325	1.02465	1.04272	1.01471	1.00598	1.00445	1.00814	1.00262	0.99927	1.01664	1.00138	1.00401	0.9999	1.03807	1.00019	1.02344	1.0134	1.01741	1.01201	1.03846	1.00893	1.03098	1.01263	1.00667	1.00826	1.02503	0.9842	0.99787	0.99815	1.00437	1.00294	0.99732	0.99816	0.99538	1.00464	0.97075	1.02582	1.02378	0.9616	0.99809	0.98936
	2	1.05981	1.04082	1.03676	1.07214	1.04786	1.02417	1.03336	1.01806	1.03104	1.06787	1.01642	1.0098	1.00744	1.02924	0.99626	1.02333	1.01035	0.99636	1.00302	1.02746	1.05526	1.01404	1.03322	1.02982	1.05138	1.03575	1.0512	1.01984	1.04607	1.02908	1.02083	1.01617	1.02541	1.00956	0.99323	0.99591	1.04552	0.99369	1.03187	1.00398	0.99004	0.98974	1.03104	0.96772	1.01015	0.99188	0.99849	1.03237
	2.5	1.0765	1.06475	1.05449	1.10456	1.066	1.04972	1.05608	1.06367	1.05926	1.07422	1.02177	1.01869	1.02139	1.04163	1.006	1.02598	1.02474	0.99779	1.02382	1.02334	1.07167	1.02953	1.0491	1.03318	1.06428	1.06059	1.07208	1.0305	1.06444	1.04593	1.02921	1.03941	1.05462	1.00997	1.0191	1.0044	0.98182	0.95875	0.95037	0.99941	0.99408	1.01426	1.00638	1.0326	1.02536	0.97776	1.01903	1.07398
	3	1.09044	1.06804	1.07556	1.12373	1.08385	1.05954	1.06174	1.08265	1.07223	1.10072	1.04628	1.03139	1.02881	1.05395	1.01626	1.0308	1.01753	1.0021	1.02042	1.03988	1.09385	1.03693	1.06191	1.03757	1.08638	1.07132	1.08705	1.0425	1.07808	1.06589	1.05225	1.05004	1.05194	1.02344	0.98583	1.02337	1.01633	0.99925	1.02697	0.99324	1.00836	1.01743	1.03459	1.06506	1.02985	1.01918	1.05233	1.00069
	3.5	1.10931	1.08679	1.09816	1.15366	1.10965	1.07389	1.08168	1.08668	1.09098	1.12999	1.04103	1.03607	1.02966	1.06405	1.02735	1.03241	1.02584	1.00857	1.04498	1.0413	1.09778	1.03835	1.08109	1.04832	1.10681	1.09096	1.10103	1.04807	1.08758	1.08019	1.0629	1.06568	1.07113	1.01535	0.97672	0.98147	1.01079	1.02151	1.0852	1.01474	1.02112	0.99083	0.95395	0.92681	1.03931	1.01868	1.03483	1.08001
	4	1.12699	1.11155	1.10192	1.17646	1.12002	1.10357	1.09603	1.0982	1.10009	1.1433	1.05771	1.03833	1.03856	1.09114	1.02965	1.04256	1.04803	1.00537	1.04276	1.04005	1.10606	1.06277	1.10331	1.04747	1.11404	1.11366	1.11217	1.06425	1.10568	1.08619	1.08047	1.08469	1.08835	1.00212	1.01702	1.00706	1.0291	1.00877	1.04409	1.0181	1.00253	0.9943	0.99881	1.0288	1.05694	0.97137	1.03073	1.05344
	4.5	1.14641	1.12268	1.12234	1.20353	1.1422	1.10742	1.10552	1.1243	1.11498	1.16011	1.06772	1.05225	1.03028	1.09834	1.03136	1.03607	1.04856	1.00123	1.05843	1.05808	1.13036	1.07912	1.1171	1.04983	1.13775	1.12737	1.12288	1.07883	1.13272	1.1056	1.08919	1.09792	1.10249	1.0292	0.98825	1.03478	0.97599	0.98308	1.05415	1.04225	1.01463	1.00359	0.98029	0.99771	0.98987	1.04238	0.94629	1.07497
	5	1.17232	1.14087	1.1496	1.21899	1.15103	1.12273	1.11773	1.1387	1.12577	1.18432	1.09108	1.06125	1.0418	1.10451	1.04169	1.03606	1.06755	1.01361	1.06198	1.05443	1.13303	1.08877	1.13819	1.05684	1.14746	1.14892	1.13332	1.08546	1.14318	1.12265	1.11107	1.11144	1.11067	1.03692	0.98396	1.00041	0.98526	1.03528	0.9928	1.02159	1.04049	0.9863	0.96441	1.06074	0.99369	1.00307	1.06829	1.06186
	5.5	1.18815	1.15615	1.16501	1.24088	1.17235	1.13727	1.13438	1.14555	1.14443	1.20251	1.09426	1.07327	1.03681	1.13234	1.03624	1.05891	1.07724	1.02653	1.08129	1.06817	1.14386	1.10191	1.14793	1.06537	1.17034	1.1588	1.14333	1.0936	1.15361	1.1402	1.11867	1.12346	1.12385	1.03298	0.98825	1.04186	1.05059	1.01317	1.05636	1.00385	1.01127	1.02788	0.99534	1.02541	1.03788	0.98938	1.06747	1.0511
	6	1.19854	1.16821	1.17744	1.2688	1.19433	1.14401	1.14799	1.15633	1.16169	1.2297	1.11125	1.07731	1.0339	1.13166	1.04109	1.04894	1.08639	1.03108	1.08929	1.07494	1.15176	1.10586	1.16983	1.08258	1.16542	1.17108	1.14701	1.10447	1.16003	1.14131	1.13382	1.12905	1.12405	1.02683	1.02217	1.03154	1.02492	1.05939	1.07569	0.99739	1.03144	0.98665	1.02957	0.96874	1.03619	1.02985	0.97453	1.02241
	6.5	1.22353	1.19104	1.1963	1.27658	1.20819	1.1624	1.15281	1.18499	1.16931	1.24974	1.1113	1.08748	1.04599	1.14482	1.04723	1.06154	1.09678	1.02297	1.0904	1.07827	1.16061	1.11307	1.17668	1.08243	1.18359	1.1805	1.15634	1.10511	1.17796	1.1506	1.14785	1.13803	1.13427	1.04599	1.02173	1.04545	0.99233	1.01398	1.02665	1.02233	1.02901	0.99931	1.00034	0.99559	1.04335	1.01141	1.02396	1.04513
	7	1.23478	1.20775	1.20276	1.29742	1.20879	1.18808	1.17681	1.1877	1.179	1.27306	1.1237	1.10257	1.04018	1.15398	1.05464	1.07292	1.1082	1.03779	1.10142	1.0879	1.17215	1.12227	1.19178	1.09244	1.19502	1.1949	1.16298	1.119	1.18034	1.16455	1.15639	1.14604	1.15004	1.04788	1.02794	1.03325	0.98919	1.01526	1.06876	1.00576	1.0361	1.00589	1.05685	1.03072	1.0488	0.98228	1.0471	1.03178
	7.5	1.25379	1.22338	1.22004	1.31315	1.22073	1.17699	1.18437	1.2017	1.19874	1.27644	1.14979	1.103	1.03875	1.16054	1.05228	1.07359	1.09951	1.04297	1.11061	1.0991	1.17563	1.12064	1.20818	1.09403	1.19843	1.20313	1.17076	1.12385	1.18625	1.1577	1.15552	1.1542	1.15141	1.03982	1.02326	1.03061	1.07368	1.05864	1.11256	1.04233	1.04743	1.02495	0.99381	1.01737	1.042	1.01028	1.03271	1.03146
	8	1.27495	1.23188	1.23355	1.32086	1.23717	1.2063	1.1893	1.2053	1.20042	1.29264	1.14737	1.11863	1.03937	1.18172	1.05019	1.06998	1.11247	1.04739	1.10619	1.11393	1.18347	1.13504	1.22258	1.09763	1.21593	1.21907	1.18036	1.1295	1.19832	1.16686	1.16377	1.15705	1.16309	1.05139	1.00571	1.06868	1.0026	1.0423	1.04193	1.0056	1.04236	1.01635	1.06126	0.99067	1.0424	0.99517	1.01169	1.04486
	8.5	1.28712	1.24229	1.25483	1.33127	1.23517	1.21184	1.19095	1.22585	1.20967	1.30999	1.15484	1.11687	1.05359	1.19765	1.05906	1.07504	1.10831	1.04867	1.11773	1.11047	1.18265	1.13912	1.22763	1.09139	1.21704	1.23238	1.18307	1.13803	1.20187	1.1727	1.1706	1.1724	1.16642	1.05323	1.0347	1.06319	1.03967	1.09489	1.12726	1.0128	1.0262	1.0157	1.08527	0.99295	1.03579	1.00186	1.058	1.08522
	9	1.30361	1.24351	1.26809	1.3456	1.25104	1.22348	1.2106	1.22226	1.22112	1.31019	1.1765	1.12568	1.05219	1.20208	1.05815	1.07481	1.13641	1.06223	1.11454	1.10872	1.18679	1.13611	1.24282	1.10821	1.22482	1.23747	1.18914	1.13958	1.20803	1.18213	1.1793	1.17101	1.17291	1.06384	1.03901	1.09062	1.02881	1.02151	1.20184	1.0368	1.04667	1.01392	1.07419	1.03955	1.0268	0.96273	1.07697	1.00499
	9.5	1.3181	1.26582	1.28046	1.35852	1.27159	1.23404	1.21459	1.22269	1.23343	1.3278	1.17381	1.13394	1.06261	1.21324	1.06085	1.07854	1.14038	1.05548	1.12868	1.12009	1.19138	1.14344	1.26189	1.10631	1.22276	1.2433	1.19678	1.14782	1.21353	1.18123	1.17127	1.17992	1.1796	1.06851	1.02813	1.08109	1.0214	1.05671	1.18141	1.0152	1.04398	1.03643	1.01366	1.03802	1.03797	1.06775	1.02622	1.0614
	10	1.3405	1.27922	1.28507	1.37899	1.28179	1.22887	1.22448	1.23584	1.2449	1.34309	1.18459	1.13779	1.05758	1.22682	1.06381	1.08566	1.13263	1.05702	1.14337	1.12134	1.19999	1.15195	1.24888	1.1121	1.22895	1.24843	1.19939	1.15072	1.21588	1.19432	1.17464	1.18592	1.1799	1.05786	1.03004	1.0801	1.0828	1.10731	1.08563	1.02278	1.07289	1.03629	1.04653	1.12357	1.0112	1.06134	1.06623	1.08277
	10.5	1.33848	1.28881	1.30313	1.37605	1.29144	1.25446	1.24267	1.24941	1.25059	1.3492	1.19777	1.13823	1.06191	1.24257	1.07884	1.08117	1.14656	1.07979	1.13473	1.13414	1.19453	1.14887	1.25445	1.10864	1.23461	1.24424	1.20321	1.14901	1.2237	1.1888	1.18466	1.19166	1.18512	1.09642	1.0352	1.10459	1.06039	1.0843	1.13637	1.02255	1.07399	1.04377	1.03708	1.10378	1.07349	1.01798	1.03396	1.04433
	11	1.36461	1.29705	1.32425	1.39699	1.30462	1.27382	1.25588	1.25836	1.266	1.37743	1.2099	1.1571	1.06215	1.25863	1.0687	1.08865	1.13922	1.06946	1.13724	1.13916	1.20355	1.1569	1.25698	1.11071	1.23869	1.25517	1.20131	1.15539	1.22067	1.19562	1.18605	1.19605	1.18667	1.0672	1.05977	1.1334	1.12621	1.06082	1.15105	1.04494	1.0684	1.03995	1.03207	1.04746	1.04795	1.063	1.01345	1.02252
	11.5	1.37968	1.31535	1.34629	1.40058	1.32113	1.28104	1.26381	1.27815	1.26888	1.38182	1.22053	1.15328	1.06722	1.25436	1.07579	1.08665	1.15357	1.07572	1.14501	1.15329	1.20694	1.16185	1.26628	1.11385	1.24837	1.25854	1.20916	1.16219	1.22808	1.20062	1.19006	1.20053	1.18834	1.08315	1.06192	1.06127	1.06046	1.07238	1.12131	1.04355	1.08982	1.03202	1.04806	1.01136	1.05117	1.01964	1.04512	1.03391
	12	1.39233	1.32736	1.35302	1.42967	1.33335	1.30064	1.27343	1.27936	1.27958	1.38913	1.22199	1.16025	1.07206	1.26897	1.06122	1.09798	1.16486	1.0961	1.14425	1.15613	1.20887	1.15624	1.27584	1.12801	1.25003	1.26737	1.20626	1.16736	1.23468	1.19541	1.1928	1.2035	1.19303	1.08216	1.04841	1.1135	1.10267	1.05381	1.1813	1.04322	1.09288	1.04573	1.05341	1.04792	1.03371	1.07229	0.98481	1.11527
	12.5	1.40711	1.33174	1.3712	1.42463	1.34448	1.3156	1.28462	1.28392	1.28584	1.3924	1.22865	1.17399	1.07701	1.28735	1.0679	1.10193	1.17016	1.09094	1.14881	1.15019	1.20863	1.15942	1.27997	1.12378	1.25841	1.27404	1.21135	1.16198	1.23947	1.20332	1.18904	1.2089	1.19759	1.06845	1.04129	1.15606	1.09887	1.11187	1.23138	1.02027	1.1172	1.07418	1.05358	1.04104	1.03356	1.02375	1.07894	1.05697
	13	1.41614	1.35077	1.3863	1.43608	1.35693	1.32122	1.28889	1.30665	1.30495	1.39628	1.2493	1.18609	1.08547	1.28927	1.07535	1.10046	1.17686	1.08554	1.17024	1.1602	1.21499	1.16124	1.28326	1.12765	1.26515	1.28232	1.21178	1.16904	1.23129	1.20267	1.18404	1.20916	1.19485	1.10513	1.09671	1.13931	1.04017	1.10785	1.16468	1.03467	1.09556	1.02698	1.02397	1.06304	1.06932	1.05217	1.07549	1.06302
	13.5	1.43732	1.36849	1.40051	1.45204	1.36173	1.33258	1.30097	1.30328	1.31024	1.42432	1.23967	1.18779	1.07639	1.2949	1.07397	1.11179	1.16821	1.08954	1.16223	1.15367	1.22004	1.16985	1.28672	1.13718	1.26264	1.2829	1.22085	1.17098	1.24755	1.20352	1.19491	1.21219	1.20079	1.11341	1.0771	1.17507	1.05487	1.07885	1.21345	1.03517	1.11086	1.02103	1.09931	1.03589	1.01805	1.01788	1.07726	1.0944
	14	1.45297	1.36882	1.42473	1.45627	1.36287	1.34786	1.31861	1.31376	1.32712	1.40975	1.26275	1.19289	1.07812	1.29849	1.07684	1.10738	1.18203	1.08819	1.17712	1.15113	1.20914	1.16293	1.29047	1.13958	1.27084	1.28804	1.21975	1.17549	1.24047	1.20345	1.19551	1.21621	1.20299	1.0987	1.06569	1.12024	1.08201	1.10376	1.18615	1.03519	1.11394	1.01122	1.0803	1.01238	1.08265	1.03877	1.05507	1.1101
	14.5	1.46851	1.38267	1.43404	1.47477	1.38119	1.35666	1.32175	1.33624	1.33609	1.41343	1.27399	1.20224	1.09258	1.32708	1.08888	1.11254	1.1905	1.09031	1.17594	1.15806	1.22265	1.16829	1.29056	1.12915	1.25496	1.29301	1.21762	1.17895	1.24765	1.20082	1.18782	1.21916	1.21135	1.09771	1.06102	1.11426	1.12504	1.09597	1.23991	1.03915	1.13046	1.02399	1.07161	1.02849	1.0506	1.05845	1.1009	1.15372
	15	1.48215	1.39892	1.44248	1.48546	1.39958	1.37531	1.33731	1.33888	1.34185	1.44375	1.28662	1.22413	1.09011	1.33381	1.07716	1.12547	1.20623	1.09822	1.17871	1.167	1.22008	1.16894	1.30019	1.14061	1.26372	1.29815	1.2237	1.18094	1.25491	1.20575	1.20093	1.22597	1.2089	1.11587	1.08952	1.15474	1.07397	1.13577	1.16837	1.02869	1.07489	1.02908	1.01854	1.11267	1.0674	1.09111	1.07107	1.12471
	15.5	1.4968	1.40771	1.46257	1.49365	1.40701	1.37207	1.34795	1.36172	1.34911	1.4469	1.28309	1.2282	1.08739	1.33534	1.09442	1.12944	1.21133	1.09893	1.18423	1.17596	1.21896	1.17065	1.30743	1.13585	1.26109	1.29706	1.2152	1.18661	1.24788	1.21015	1.20341	1.22403	1.20735	1.11323	1.09387	1.15652	1.08922	1.09097	1.21088	1.03087	1.1064	1.05332	1.05631	1.03851	1.04777	1.08909	1.07423	1.1202
	16	1.50997	1.4315	1.48056	1.50144	1.41545	1.39359	1.3557	1.37134	1.3719	1.46125	1.30024	1.22981	1.10846	1.33698	1.08438	1.12663	1.21806	1.1022	1.1853	1.16676	1.22209	1.1632	1.30291	1.12991	1.27173	1.30911	1.21578	1.18538	1.24947	1.21227	1.20211	1.22403	1.20721	1.12571	1.06494	1.15252	1.13858	1.14639	1.27343	1.03558	1.14773	1.0623	1.01781	1.03445	1.06385	1.10565	1.11112	1.11116
	16.5	1.52428	1.43747	1.49023	1.52112	1.43821	1.40328	1.36696	1.36659	1.37186	1.45789	1.30961	1.24025	1.10717	1.34187	1.09233	1.12303	1.2303	1.10155	1.18791	1.16931	1.22244	1.17669	1.29691	1.1412	1.26692	1.30776	1.22698	1.18837	1.24902	1.21473	1.20272	1.22881	1.21756	1.1192	1.08604	1.12614	1.09752	1.12672	1.2041	1.04204	1.14101	1.0547	1.05349	1.03206	1.08162	1.05474	1.05384	1.04126
	17	1.53423	1.44868	1.50302	1.50973	1.4383	1.4152	1.37707	1.37348	1.39368	1.47158	1.32114	1.25314	1.10877	1.35489	1.0925	1.1428	1.21464	1.10215	1.18749	1.18252	1.22611	1.17058	1.30444	1.13635	1.26697	1.30961	1.22072	1.18853	1.25372	1.21609	1.21043	1.2308	1.21635	1.11722	1.11087	1.19466	1.13563	1.10963	1.23151	1.03212	1.16089	1.07824	0.99661	1.06317	1.03693	1.05437	1.09403	1.10659
	17.5	1.54236	1.44429	1.52592	1.51753	1.44582	1.42103	1.37122	1.37686	1.40079	1.48295	1.32589	1.25769	1.11852	1.35622	1.09056	1.14516	1.23394	1.10484	1.18877	1.17528	1.22726	1.17565	1.3234	1.1354	1.26176	1.30876	1.22326	1.18721	1.26566	1.21351	1.20502	1.23907	1.21543	1.12725	1.10234	1.16825	1.14109	1.13304	1.20007	1.00867	1.14929	1.07569	1.07437	1.10451	1.01428	1.11001	1.07162	1.0963
	18	1.54771	1.46984	1.5168	1.53095	1.4674	1.4203	1.38985	1.3851	1.40367	1.48324	1.33872	1.26692	1.12698	1.369	1.09112	1.1406	1.2474	1.11027	1.19018	1.17462	1.23589	1.17081	1.31211	1.13442	1.27608	1.31164	1.22542	1.19034	1.25952	1.22215	1.20713	1.2347	1.22018	1.14525	1.09601	1.20906	1.12443	1.13024	1.21432	1.07052	1.15981	1.05948	1.04358	1.04095	1.07441	1.04302	1.10681	1.1013
	18.5	1.55197	1.47557	1.54563	1.53315	1.46438	1.4365	1.39317	1.37927	1.41278	1.49318	1.34199	1.27468	1.12357	1.34965	1.10079	1.15382	1.25195	1.10409	1.19392	1.17774	1.23397	1.17618	1.32969	1.13881	1.26787	1.31589	1.22185	1.19528	1.25978	1.21351	1.20229	1.24219	1.22727	1.132	1.12346	1.19398	1.16913	1.14064	1.15098	1.05381	1.13296	1.07312	0.977	1.07273	1.06042	1.06721	1.12886	1.10339
	19	1.57751	1.4921	1.55571	1.54247	1.47805	1.44088	1.42296	1.38765	1.43436	1.50064	1.35203	1.28113	1.12994	1.36935	1.10673	1.15649	1.26203	1.10699	1.20569	1.18981	1.23846	1.17154	1.31692	1.13359	1.2657	1.31883	1.22539	1.19941	1.26353	1.21861	1.20207	1.23832	1.21153	1.13629	1.12871	1.1829	1.16125	1.14602	1.23486	1.01811	1.17983	1.04684	1.02453	1.07699	1.05356	1.10014	1.17894	1.06722
	19.5	1.5803	1.50977	1.56547	1.5613	1.48918	1.44929	1.40244	1.38759	1.45058	1.48932	1.36586	1.28604	1.13519	1.38453	1.11231	1.17607	1.26592	1.12393	1.21187	1.18148	1.23682	1.17864	1.32898	1.14228	1.26859	1.32207	1.22659	1.20106	1.27575	1.23222	1.21079	1.24393	1.22465	1.12469	1.12415	1.21305	1.14815	1.14211	1.19077	1.03746	1.18239	1.07705	1.04086	1.10096	1.01385	1.09836	1.10993	1.08075
	20	1.58741	1.51202	1.56583	1.55527	1.50621	1.44974	1.41681	1.39583	1.43634	1.50325	1.37334	1.29417	1.13514	1.37222	1.1178	1.1689	1.27914	1.12104	1.20001	1.17957	1.23794	1.18523	1.32067	1.14698	1.26889	1.3131	1.2285	1.19889	1.26685	1.22894	1.20688	1.24514	1.22138	1.15679	1.11305	1.20566	1.23106	1.15382	1.27813	1.03656	1.16943	1.09117	0.97581	0.98663	1.06352	1.10914	1.06004	1.04962
	20.5	1.58193	1.50187	1.55633	1.54969	1.4838	1.43406	1.4075	1.39525	1.4292	1.47966	1.37201	1.29499	1.1295	1.36745	1.1092	1.15783	1.25896	1.12122	1.18807	1.19333	1.23116	1.17539	1.31861	1.13322	1.27211	1.30883	1.22173	1.19717	1.26225	1.21654	1.20043	1.23833	1.2181	1.13544	1.11226	1.17784	1.14522	1.15867	1.24942	1.06589	1.15599	1.05184	1.03088	1.04013	1.04268	1.08226	1.13714	1.12009
	21	1.55917	1.49553	1.53595	1.53792	1.46659	1.41747	1.39557	1.36652	1.43157	1.47772	1.36254	1.28184	1.11402	1.3744	1.10228	1.15257	1.26225	1.11001	1.19642	1.19535	1.23094	1.1722	1.31254	1.13316	1.26752	1.30499	1.21464	1.1861	1.25682	1.21436	1.20028	1.23124	1.21269	1.13706	1.13315	1.23304	1.25089	1.15631	1.24747	1.0384	1.1612	1.09409	1.01406	1.03758	1.05237	1.04665	1.12139	1.08988
	21.5	1.55103	1.47683	1.51901	1.52906	1.45959	1.41304	1.36966	1.35393	1.41389	1.45739	1.35324	1.27314	1.11157	1.33414	1.09564	1.14647	1.25577	1.11506	1.19443	1.18473	1.2228	1.16949	1.29787	1.12147	1.26028	1.29923	1.21039	1.19046	1.24363	1.20381	1.19219	1.22652	1.2105	1.14283	1.11905	1.23083	1.22946	1.19163	1.26076	1.05188	1.14982	1.07321	1.05196	1.01931	1.06841	1.041	1.12153	1.11792
	22	1.53215	1.46524	1.51211	1.51364	1.44652	1.40073	1.35797	1.33306	1.41713	1.44511	1.33231	1.25729	1.09748	1.32811	1.08172	1.14292	1.22824	1.10883	1.18852	1.18503	1.21687	1.16195	1.29321	1.11458	1.24656	1.29277	1.20548	1.17986	1.23919	1.19556	1.18527	1.2158	1.19471	1.13001	1.12662	1.18189	1.17685	1.1791	1.21082	1.03935	1.13505	1.04306	1.02673	1.10028	1.01859	1.06972	1.10811	1.11685
	22.5	1.51192	1.4533	1.4951	1.49593	1.44001	1.39183	1.35492	1.33575	1.41534	1.45029	1.33576	1.25676	1.09446	1.32007	1.0829	1.14161	1.22299	1.1075	1.18092	1.17237	1.21633	1.14407	1.29039	1.11271	1.23062	1.28145	1.19239	1.17354	1.23743	1.19174	1.17787	1.2156	1.1937	1.13052	1.12682	1.15871	1.26543	1.16387	1.15103	1.06473	1.13394	1.02044	1.04896	1.07316	1.04232	1.03551	1.12578	1.04838
	23	1.50498	1.43948	1.47569	1.48058	1.4147	1.37245	1.33861	1.3308	1.39772	1.42744	1.32051	1.24018	1.0785	1.30931	1.07108	1.12603	1.23324	1.10351	1.17822	1.16489	1.21389	1.15806	1.28116	1.11741	1.22212	1.27172	1.18555	1.16475	1.2206	1.18472	1.17073	1.20031	1.18513	1.1405	1.13147	1.17141	1.15158	1.15717	1.17576	1.04173	1.1446	1.06967	0.99048	1.0705	1.06732	1.05011	1.1709	1.04805
	23.5	1.49697	1.43541	1.46464	1.47736	1.41197	1.35583	1.33252	1.31735	1.39209	1.41784	1.31689	1.23491	1.07668	1.31504	1.05992	1.12533	1.23637	1.09406	1.16973	1.16262	1.19859	1.14388	1.26439	1.10181	1.21051	1.26451	1.17901	1.15969	1.21058	1.16949	1.16292	1.19108	1.17987	1.13494	1.11392	1.20372	1.13901	1.12258	1.19647	1.05404	1.13988	1.05378	0.94162	1.03851	1.02102	1.05376	1.10971	1.07418
	24	1.49201	1.41755	1.45964	1.46147	1.40883	1.35746	1.32397	1.30322	1.38826	1.4172	1.31117	1.22173	1.0699	1.29639	1.04877	1.11223	1.21832	1.09631	1.16721	1.16249	1.19336	1.13809	1.25641	1.09855	1.2145	1.25607	1.17244	1.15135	1.2015	1.16017	1.1587	1.18694	1.16985	1.1406	1.0956	1.163	1.16073	1.14118	1.1348	1.04279	1.13164	1.0399	0.99349	1.0902	1.03424	1.01276	1.15721	1.08503
	24.5	1.48134	1.40873	1.4311	1.45886	1.39304	1.34541	1.32003	1.28809	1.3727	1.39346	1.30957	1.21288	1.06854	1.30112	1.0568	1.11577	1.18787	1.09952	1.16066	1.14689	1.19417	1.13432	1.2487	1.09232	1.19614	1.24903	1.17003	1.14618	1.1964	1.15383	1.14408	1.17734	1.15938	1.13879	1.10503	1.15716	1.21545	1.12979	1.18062	1.03055	1.13254	1.07292	0.99494	1.01138	1.07729	1.07388	1.08051	1.03785
	25	1.47283	1.40167	1.43526	1.45152	1.37665	1.33167	1.2977	1.28337	1.36703	1.40212	1.30342	1.2063	1.06861	1.29073	1.04575	1.10514	1.20081	1.09599	1.15727	1.16434	1.1878	1.12419	1.23815	1.08417	1.18883	1.24842	1.16637	1.14543	1.18801	1.13701	1.13985	1.17183	1.15999	1.12717	1.10699	1.20448	1.14631	1.13771	1.15107	1.024	1.12285	1.01165	1.07274	1.07339	1.07984	1.03798	1.07291	1.05778
	25.5	1.45291	1.38331	1.42843	1.44146	1.36547	1.31839	1.2988	1.28378	1.36408	1.38305	1.29143	1.20891	1.05666	1.28166	1.03902	1.09728	1.17833	1.09755	1.1628	1.15213	1.18843	1.11986	1.24698	1.08824	1.19336	1.24187	1.16389	1.13912	1.18814	1.14263	1.14926	1.16663	1.15165	1.14133	1.09943	1.14792	1.13446	1.14428	1.16097	1.04758	1.14692	1.04666	0.99587	0.98527	1.03347	1.02141	1.06179	1.05552
	26	1.44818	1.37504	1.41236	1.43343	1.35974	1.3135	1.29005	1.27694	1.35998	1.38176	1.2758	1.19157	1.04789	1.28366	1.03661	1.08318	1.17474	1.09704	1.16335	1.17345	1.19256	1.1293	1.23265	1.08647	1.19496	1.24894	1.16718	1.14315	1.18381	1.14282	1.1414	1.17008	1.15171	1.12819	1.12497	1.17263	1.1378	1.1372	1.15873	1.03972	1.11827	1.04779	1.01129	0.9649	1.02608	1.0224	1.07022	1.07214
	26.5	1.4403	1.37406	1.40212	1.41866	1.3585	1.32343	1.28407	1.26296	1.34007	1.37596	1.28422	1.19142	1.04172	1.25279	1.03833	1.0752	1.17522	1.08662	1.15668	1.13966	1.18122	1.12228	1.23825	1.0775	1.1905	1.23174	1.15554	1.1353	1.17779	1.13467	1.13813	1.16455	1.14016	1.12781	1.11755	1.14083	1.11935	1.158	1.17063	1.04869	1.11081	1.00916	0.91413	1.0121	1.05832	1.02103	1.06717	1.06373
	27	1.43562	1.36762	1.39773	1.41414	1.33943	1.29865	1.28244	1.25379	1.33955	1.36348	1.26489	1.17887	1.03669	1.2594	1.03028	1.06574	1.15718	1.09122	1.15231	1.16848	1.18019	1.11768	1.2326	1.07582	1.18598	1.23167	1.15834	1.12603	1.17205	1.12276	1.13754	1.157	1.13638	1.12494	1.1155	1.12921	1.17039	1.11468	1.13438	1.04573	1.09566	1.07411	0.94359	1.05888	1.04359	1.03616	1.08665	1.10477
	27.5	1.43519	1.3583	1.37365	1.40654	1.3297	1.28381	1.26226	1.24672	1.33177	1.35925	1.26227	1.16409	1.03969	1.23774	1.01867	1.06113	1.15831	1.08236	1.15025	1.13651	1.18108	1.12006	1.23402	1.08164	1.17735	1.22446	1.14891	1.12568	1.17359	1.11859	1.13298	1.15628	1.1425	1.11823	1.10266	1.131	1.13888	1.10598	1.18389	1.0763	1.11954	1.03719	0.98535	1.01799	1.058	1.03073	1.09234	1.04681
	28	1.42864	1.34365	1.36515	1.40195	1.32888	1.27903	1.25763	1.22746	1.32716	1.35293	1.26841	1.15924	1.02139	1.24118	1.02116	1.06438	1.1645	1.06504	1.13817	1.14376	1.16411	1.11443	1.22309	1.07294	1.17064	1.22623	1.14367	1.12518	1.16826	1.11102	1.12481	1.15001	1.13448	1.12544	1.10104	1.14201	1.16554	1.08711	1.20208	1.02539	1.08374	1.03019	0.99941	1.00725	1.03965	1.0656	1.05025	1.12159
	28.5	1.42237	1.34451	1.36606	1.39201	1.31988	1.28343	1.25264	1.22501	1.32079	1.34851	1.24485	1.16428	1.01784	1.22374	1.00983	1.05314	1.14266	1.0707	1.13282	1.13438	1.16309	1.11976	1.22009	1.06883	1.16521	1.22284	1.14314	1.11867	1.1648	1.11412	1.1304	1.14683	1.13355	1.11763	1.09133	1.11497	1.14515	1.0895	1.1055	1.01785	1.11993	1.02584	1.02331	1.01131	0.98836	1.06316	1.12783	1.04414
	29	1.41589	1.32628	1.35492	1.38967	1.30922	1.27229	1.2441	1.22137	1.30873	1.33231	1.23977	1.15079	1.01578	1.2251	1.00345	1.04902	1.13607	1.0726	1.14052	1.15687	1.16381	1.1087	1.21747	1.06783	1.16472	1.2213	1.14478	1.12328	1.16589	1.10973	1.12708	1.14665	1.12277	1.12971	1.08805	1.09661	1.14651	1.07966	1.19077	1.06786	1.12471	1.02562	0.94342	1.05446	1.03994	1.04092	1.06859	1.0865
	29.5	1.40451	1.32863	1.34037	1.38562	1.30302	1.26054	1.23963	1.22251	1.30458	1.34543	1.23965	1.14671	0.9946	1.21136	1.00053	1.05367	1.11645	1.06596	1.13467	1.14841	1.16367	1.1115	1.20839	1.07038	1.16453	1.21982	1.13804	1.11794	1.16641	1.10852	1.12105	1.14399	1.12349	1.12004	1.09343	1.1033	1.09661	1.14018	1.10013	1.02967	1.11828	1.01404	0.96395	1.0447	1.01429	1.10331	1.07873	1.05926
	30	1.39226	1.31816	1.33759	1.38157	1.29828	1.26961	1.24396	1.21521	1.29709	1.32257	1.2373	1.14795	1.01296	1.22057	0.98977	1.03921	1.12958	1.06144	1.1328	1.1346	1.1631	1.11455	1.21133	1.06819	1.16133	1.21742	1.1424	1.11108	1.15983	1.10275	1.11418	1.13982	1.11936	1.11146	1.06856	1.10955	1.09101	1.1016	1.13423	1.01592	1.10319	1.02655	0.96085	1.04774	1.05679	1.01	1.02195	1.0989
	30.5	1.3873	1.31491	1.3383	1.37428	1.29285	1.25833	1.23577	1.22038	1.28272	1.33265	1.23509	1.13938	1.00507	1.20081	0.9946	1.04899	1.1213	1.06716	1.13893	1.1437	1.16637	1.11383	1.20148	1.05765	1.15955	1.21491	1.13653	1.11309	1.16149	1.10385	1.10857	1.13897	1.12232	1.10928	1.09466	1.10335	1.12511	1.10864	1.0824	1.0424	1.11505	1.04238	1.06953	1.02317	1.02285	1.0347	1.11183	1.03995
	31	1.37571	1.30485	1.31232	1.36181	1.29181	1.2421	1.21851	1.20701	1.28357	1.31124	1.23303	1.12616	0.99913	1.18116	0.98914	1.02384	1.10866	1.06121	1.13535	1.1273	1.15684	1.11197	1.19574	1.05882	1.15604	1.20986	1.13068	1.10349	1.15823	1.1029	1.11428	1.13315	1.11084	1.1134	1.08049	1.05634	1.10599	1.08815	1.09736	1.03683	1.09296	1.04786	0.96087	1.08629	1.06352	1.01736	1.04466	1.02317
	31.5	1.37841	1.3042	1.32351	1.36136	1.26758	1.23688	1.20584	1.20395	1.26525	1.30776	1.21479	1.12146	0.99331	1.18547	0.98738	1.02821	1.09399	1.04825	1.13911	1.1408	1.15569	1.10773	1.18357	1.05402	1.15401	1.19893	1.1281	1.10267	1.14827	1.09987	1.10751	1.12594	1.1134	1.10525	1.07719	1.07824	1.08092	1.08284	1.0709	1.0335	1.10246	1.0294	1.00033	1.00766	1.03123	0.99733	1.05002	1.08011
	32	1.36303	1.29931	1.31374	1.34896	1.26358	1.22864	1.20648	1.20468	1.26301	1.29616	1.21127	1.1259	0.99239	1.1947	0.98628	1.02214	1.10934	1.04003	1.12673	1.12947	1.14864	1.10374	1.19601	1.04728	1.14311	1.20268	1.12467	1.09966	1.15164	1.0958	1.10338	1.12172	1.10737	1.11375	1.09076	1.07569	1.14909	1.06283	1.11765	1.03562	1.0883	1.03141	0.98156	1.00816	1.05774	1.04763	1.04337	1.06224
	32.5	1.36211	1.28909	1.31867	1.35069	1.25788	1.23702	1.20225	1.20455	1.26583	1.29661	1.20885	1.1095	0.98858	1.17413	0.97319	1.02266	1.10707	1.05694	1.1346	1.13144	1.14826	1.09538	1.18698	1.05204	1.14694	1.19032	1.12403	1.09313	1.14926	1.08995	1.1082	1.11562	1.10281	1.11469	1.0724	1.1084	1.11367	1.05642	1.10142	1.03737	1.083	1.01151	0.96605	0.99049	1.04628	1.0315	1.06905	1.06495
	33	1.34998	1.29398	1.29058	1.33793	1.24755	1.22306	1.19716	1.20569	1.26246	1.29094	1.21048	1.10101	0.98694	1.18569	0.97039	1.00756	1.0923	1.05128	1.12031	1.12161	1.13992	1.09731	1.17605	1.04672	1.13101	1.1845	1.12058	1.08883	1.14992	1.08851	1.09509	1.11328	1.10765	1.13536	1.06917	1.1149	1.06147	1.0706	1.07522	1.05435	1.04523	1.00219	0.94342	1.09264	1.05361	1.038	1.08627	1.01671
	33.5	1.34432	1.26681	1.2858	1.32841	1.24822	1.21088	1.19167	1.18235	1.24827	1.29668	1.19321	1.1063	0.98714	1.17334	0.95392	1.00902	1.08718	1.04997	1.128	1.12903	1.14197	1.09602	1.16971	1.04579	1.13551	1.18061	1.11647	1.08737	1.13929	1.08873	1.09275	1.1139	1.09764	1.10782	1.0703	1.0747	1.13991	1.07781	1.10385	1.01501	1.08735	1.00903	0.9882	0.98728	1.07114	1.04963	0.99928	1.08355
	34	1.3266	1.27381	1.28069	1.32623	1.242	1.20473	1.18218	1.18713	1.23978	1.29477	1.203	1.10309	0.9759	1.15792	0.96044	1.00132	1.07993	1.05123	1.11774	1.11353	1.13685	1.09365	1.16851	1.03612	1.12238	1.17824	1.11265	1.08258	1.13944	1.07641	1.09333	1.10544	1.1033	1.0978	1.06633	1.08942	1.07582	1.06204	1.15074	1.02755	1.07627	0.98971	0.95334	1.054	1.03041	1.02281	1.0569	1.00958
	34.5	1.32294	1.26177	1.28223	1.32092	1.24261	1.21406	1.17918	1.18533	1.23561	1.27387	1.18736	1.09398	0.96488	1.15904	0.95941	0.99887	1.07779	1.04022	1.10485	1.1201	1.12939	1.09374	1.16463	1.03648	1.11747	1.17626	1.11039	1.08006	1.13464	1.07737	1.09002	1.10034	1.09347	1.11784	1.04486	1.07073	1.09985	1.05052	1.12627	1.05532	1.04959	1.0275	0.91156	1.06067	1.10333	1.05075	1.06687	0.98075
	35	1.32525	1.26467	1.27648	1.31596	1.22911	1.20691	1.17715	1.17581	1.2264	1.27462	1.18152	1.08701	0.97488	1.15292	0.94675	0.99175	1.06407	1.04573	1.1088	1.12268	1.131	1.09924	1.17062	1.03166	1.1167	1.17089	1.10688	1.07839	1.13747	1.08099	1.08785	1.09629	1.09604	1.10979	1.07813	1.07577	1.14194	1.01293	1.06424	0.99765	1.09015	0.9879	1.0044	1.04177	1.05956	1.01291	1.08261	1.07561
	35.5	1.32491	1.251	1.27023	1.31625	1.22557	1.19128	1.1712	1.18184	1.22265	1.27235	1.18267	1.08387	0.96506	1.15391	0.94972	0.989	1.06298	1.03214	1.10561	1.11845	1.12374	1.09155	1.16775	1.02874	1.1081	1.16384	1.10837	1.08161	1.13583	1.0681	1.08515	1.09702	1.09219	1.09738	1.06824	1.06118	1.10386	1.04369	1.03891	0.99474	1.06169	1.01744	0.939	1.05274	1.03446	0.99596	1.06607	1.05435
	36	1.30631	1.24444	1.25433	1.30997	1.21936	1.19459	1.17118	1.16896	1.22106	1.27549	1.16781	1.06694	0.97543	1.13774	0.94379	0.98946	1.05658	1.03885	1.09065	1.1221	1.12528	1.0818	1.15314	1.02329	1.10382	1.16517	1.09647	1.06759	1.12764	1.06338	1.08412	1.09107	1.0796	1.10997	1.05162	1.07625	1.07732	1.1066	1.058	1.01358	1.06984	1.01579	1.03924	0.98749	1.04308	1.05526	1.02278	1.01119
	36.5	1.29844	1.23963	1.24944	1.29884	1.21774	1.18606	1.16069	1.17595	1.21291	1.27363	1.16787	1.07449	0.9501	1.13798	0.93657	0.99087	1.0454	1.0389	1.0959	1.12648	1.12024	1.0826	1.15036	1.02745	1.10726	1.16289	1.09998	1.06687	1.12291	1.06404	1.08219	1.08885	1.09364	1.09781	1.07053	1.03792	1.10888	1.01928	1.11803	1.04409	1.05226	0.98464	0.98505	1.03946	1.03619	1.06394	0.9999	1.01613
	37	1.29909	1.24037	1.2429	1.29705	1.21927	1.18781	1.15082	1.17351	1.20733	1.25352	1.16557	1.07571	0.95052	1.1364	0.9344	0.98781	1.04417	1.03558	1.08345	1.11105	1.11519	1.08221	1.15122	1.02538	1.10187	1.15999	1.09155	1.06932	1.11163	1.06114	1.08326	1.08547	1.07882	1.09393	1.05832	1.06459	1.08348	1.0487	1.04601	1.03526	1.05842	1.00454	0.95752	0.96296	0.98499	1.01239	1.05006	1.04337
	37.5	1.30044	1.22289	1.23599	1.29091	1.20641	1.18762	1.16173	1.1639	1.20956	1.24403	1.14975	1.07042	0.95014	1.12952	0.92445	0.98055	1.02331	1.028	1.09707	1.10709	1.1142	1.07712	1.14706	1.01657	1.09529	1.14955	1.09199	1.06557	1.10777	1.05946	1.0836	1.07958	1.07683	1.09596	1.06821	1.04868	1.10501	1.04384	1.09878	1.02797	1.0972	1.02366	1.02107	0.99607	1.05929	0.95502	1.03541	1.05593
	38	1.28944	1.22023	1.2357	1.27958	1.19949	1.17758	1.1517	1.16632	1.20318	1.23323	1.15088	1.06248	0.95217	1.12203	0.92937	0.97708	1.04048	1.03284	1.09883	1.1128	1.11063	1.07693	1.1455	1.01069	1.09354	1.14952	1.09701	1.06314	1.11605	1.05786	1.07701	1.07898	1.08163	1.09801	1.052	1.04163	1.14221	1.08626	1.05497	1.03316	1.07528	0.99186	1.00778	0.99376	1.00645	1.0259	1.00782	1.04808
	38.5	1.28592	1.2192	1.22012	1.27859	1.19664	1.17401	1.13885	1.16286	1.18425	1.24529	1.1507	1.05436	0.94612	1.12249	0.92775	0.96788	1.04318	1.0251	1.08391	1.10118	1.11015	1.07367	1.14351	1.01822	1.08194	1.15267	1.08976	1.05604	1.1095	1.0528	1.06954	1.07117	1.07209	1.11068	1.06119	1.05971	1.07821	1.04848	1.07203	1.036	1.06326	0.9784	1.0085	1.07019	1.01376	1.00632	0.99597	1.00515
	39	1.26461	1.21628	1.22226	1.27056	1.19123	1.16707	1.13651	1.15213	1.1828	1.21891	1.13925	1.05324	0.93912	1.10707	0.91062	0.96849	1.01523	1.03171	1.07898	1.10262	1.1056	1.07386	1.13913	1.01641	1.08941	1.14792	1.07898	1.05829	1.10967	1.05063	1.06678	1.0772	1.07678	1.09478	1.05477	1.06967	1.09928	1.06751	1.07598	1.01616	1.06368	0.99864	0.97489	1.02921	1.03338	1.04367	1.04013	1.06036
	39.5	1.27136	1.21473	1.20779	1.25591	1.18943	1.15983	1.13066	1.13873	1.17484	1.21447	1.12858	1.04207	0.9368	1.10514	0.91321	0.96216	1.02494	1.01937	1.07609	1.09092	1.10031	1.07376	1.13179	1.01331	1.08601	1.14409	1.08303	1.05481	1.10184	1.04616	1.06117	1.0716	1.07468	1.08454	1.05834	1.06794	1.1	1.03712	1.02947	0.99985	1.06651	0.99899	0.95615	1.00718	1.04782	0.9841	1.03269	1.09586
	40	1.26096	1.20282	1.21074	1.25957	1.17452	1.15898	1.12161	1.14358	1.16972	1.20916	1.12753	1.04302	0.92726	1.09038	0.90597	0.96288	1.03806	1.00921	1.07643	1.09633	1.10245	1.07182	1.12969	1.00739	1.08616	1.13996	1.07352	1.04952	1.09968	1.04429	1.06643	1.07143	1.06685	1.09954	1.07445	1.0305	1.06752	1.08064	1.01865	1.05323	1.08087	0.98686	0.98591	1.0388	0.9821	1.00298	0.99684	1.04412
	40.5	1.24959	1.19657	1.20134	1.26656	1.17654	1.14968	1.12411	1.13802	1.16081	1.21477	1.12138	1.0327	0.91666	1.0982	0.90679	0.96435	1.01289	1.00065	1.0756	1.09387	1.10076	1.06664	1.12825	1.00165	1.08346	1.13942	1.07615	1.04552	1.09693	1.03701	1.0601	1.0662	1.06285	1.09315	1.05507	1.07813	0.99705	1.06259	1.09313	0.996	1.04674	0.99256	0.96203	0.98469	1.05312	0.99659	1.02734	0.97974
	41	1.25304	1.18625	1.20049	1.25693	1.16817	1.14167	1.10794	1.12703	1.16061	1.19859	1.10959	1.03264	0.92508	1.08783	0.90924	0.94492	0.99812	1.00335	1.07958	1.08768	1.0949	1.07017	1.12523	1.00635	1.07744	1.13672	1.07404	1.04451	1.09238	1.03065	1.05703	1.06689	1.06473	1.09806	1.05612	1.02978	1.07444	1.03131	1.00771	0.99705	1.05037	0.96994	0.99312	0.98569	1.01032	1.02342	1.07026	1.07595
	41.5	1.23895	1.18124	1.19501	1.25579	1.16859	1.14678	1.1076	1.12534	1.14844	1.17	1.10239	1.02377	0.92162	1.07335	0.91142	0.94471	0.99184	0.99003	1.0748	1.09444	1.09203	1.06624	1.11623	0.99815	1.07886	1.12988	1.07089	1.04422	1.08622	1.0365	1.04429	1.05646	1.05998	1.09693	1.05995	1.06563	1.06801	0.98507	1.01855	1.02568	1.09137	0.9841	0.96298	1.07391	1.00475	0.98034	1.04145	1.05911
	42	1.22301	1.18273	1.18364	1.23908	1.1648	1.13398	1.11007	1.11338	1.15125	1.17977	1.09507	1.02969	0.91125	1.06456	0.89834	0.93529	0.99083	1.00437	1.06833	1.09138	1.08415	1.05717	1.1068	0.98655	1.07463	1.12874	1.06664	1.03626	1.08545	1.0386	1.04719	1.05892	1.0568	1.08489	1.06069	1.02869	1.1257	0.98606	1.08549	1.02497	1.07569	1.00914	0.99518	1.06322	1.01451	1.00142	0.98074	0.99282
	42.5	1.22463	1.18083	1.18971	1.23596	1.15361	1.13847	1.10459	1.11945	1.14125	1.18818	1.10737	1.02535	0.91626	1.05884	0.89055	0.95396	0.99597	0.98516	1.06448	1.08208	1.08752	1.06371	1.10341	0.99335	1.0685	1.12346	1.05719	1.03325	1.08668	1.0278	1.04179	1.04779	1.05055	1.08604	1.04314	1.04579	1.08985	1.01661	1.03695	0.99473	1.08583	0.9781	0.92574	1.03482	0.99959	1.03162	0.99548	1.01704
	43	1.23071	1.16586	1.17778	1.22887	1.14421	1.12712	1.10472	1.11479	1.13625	1.17755	1.09679	1.01714	0.91774	1.05656	0.89517	0.93666	0.98965	1.01314	1.05771	1.07693	1.09057	1.06106	1.10201	0.99044	1.07578	1.1278	1.05904	1.02898	1.08471	1.0224	1.03424	1.04954	1.05466	1.08902	1.04023	1.05374	1.03633	1.02901	1.07293	1.00268	1.04639	0.97855	0.92392	1.02786	1.076	0.97525	0.98264	1.05951
	43.5	1.21791	1.16836	1.17105	1.22744	1.147	1.11926	1.08862	1.11263	1.13182	1.16718	1.08869	1.01713	0.91228	1.0622	0.88804	0.93057	0.99161	0.99991	1.06509	1.08272	1.08668	1.05845	1.09075	0.98938	1.06595	1.12465	1.06204	1.03251	1.07585	1.02336	1.03905	1.04705	1.04595	1.08875	1.03773	1.01844	1.07399	1.00282	1.02529	1.02209	1.03476	1.00792	1.00119	1.0912	1.03459	0.99743	1.0068	1.01282
	44	1.21499	1.16448	1.15944	1.22361	1.14222	1.12762	1.09332	1.11043	1.13129	1.15717	1.07737	1.01315	0.91122	1.04306	0.88029	0.93883	0.99571	0.9968	1.05144	1.07659	1.08366	1.05777	1.08582	0.98635	1.06063	1.12534	1.05291	1.03238	1.07426	1.0163	1.03766	1.04475	1.04622	1.08715	1.04164	1.03902	1.07335	1.05688	1.05968	1.01269	1.05727	0.96233	0.95628	1.04289	1.03969	1.01738	1.07704	1.0681
	44.5	1.20358	1.16237	1.15513	1.22254	1.13334	1.10901	1.08582	1.10626	1.11929	1.15667	1.07529	1.01106	0.89788	1.04656	0.88673	0.92828	0.97459	1.0014	1.04833	1.07575	1.08517	1.05385	1.09564	0.9842	1.05809	1.11905	1.0575	1.02601	1.07836	1.02284	1.03258	1.04445	1.04224	1.07376	1.04678	1.06173	1.09949	0.99606	1.09463	1.05093	1.04145	0.99117	0.971	0.96422	1.03317	0.9852	1.02256	1.06576
	45	1.20118	1.15152	1.15065	1.20631	1.13665	1.11307	1.08328	1.09369	1.13073	1.14411	1.06626	1.0033	0.89952	1.04661	0.87821	0.93297	0.96764	0.99893	1.05061	1.0686	1.07931	1.05064	1.08838	0.98549	1.05307	1.11645	1.04914	1.02617	1.06643	1.02009	1.02825	1.03899	1.04101	1.07908	1.0401	1.04828	1.03602	0.98626	1.08989	1.0148	1.03273	0.93822	0.97456	1.01335	1.0133	1.02077	1.01279	1.00336
	45.5	1.19821	1.14799	1.15239	1.20397	1.13097	1.09979	1.07113	1.09665	1.11053	1.14076	1.06136	0.99599	0.89845	1.04017	0.88026	0.91368	0.96767	0.98908	1.04742	1.05701	1.07825	1.05121	1.07383	0.98256	1.05557	1.11168	1.04921	1.0215	1.06407	1.01811	1.02989	1.03714	1.03621	1.07315	1.04396	1.03183	1.06559	0.97365	1.03614	1.01305	1.05657	0.99083	0.94262	1.06745	0.99228	1.01173	1.03093	1.0177
	46	1.17871	1.14306	1.15498	1.20295	1.12105	1.0884	1.079	1.10311	1.11606	1.12805	1.07061	0.99156	0.91197	1.04045	0.86748	0.91943	0.95686	0.9848	1.04073	1.06416	1.08076	1.0585	1.06982	0.97658	1.04979	1.11386	1.04636	1.02512	1.06114	1.00835	1.02718	1.03343	1.02779	1.07329	1.03374	1.03089	1.00551	0.99251	1.02223	1.02118	1.05744	0.96829	0.96734	1.04934	1.06056	0.98979	1.0054	0.94641
	46.5	1.18128	1.14252	1.13921	1.1932	1.12447	1.08626	1.07575	1.09313	1.10867	1.14286	1.05933	0.99094	0.89733	1.03701	0.86277	0.91564	0.97221	0.99147	1.03332	1.06142	1.07175	1.04441	1.06937	0.97477	1.04574	1.1073	1.04071	1.01856	1.0584	1.00628	1.02172	1.03077	1.03073	1.08958	1.05967	1.04892	1.0567	0.98418	1.02816	1.01474	1.08016	0.95133	0.9667	1.0511	1.05789	0.98144	0.96657	1.03069
	47	1.18366	1.13978	1.13168	1.19273	1.11672	1.08507	1.07613	1.09436	1.09745	1.13362	1.0577	0.98555	0.89993	1.02063	0.8695	0.91631	0.97573	0.98929	1.03833	1.07984	1.07367	1.04803	1.07824	0.96889	1.0467	1.10261	1.03866	1.01677	1.05306	1.00683	1.02019	1.02944	1.02688	1.07664	1.04296	1.0249	1.02091	1.00902	1.07479	1.02866	1.05152	0.96422	0.96241	0.98467	1.01151	1.03329	1.06535	1.06007
	47.5	1.16469	1.13328	1.13265	1.18286	1.11643	1.08426	1.06193	1.10225	1.09934	1.12896	1.05523	0.98095	0.89006	1.01469	0.86111	0.90629	0.97487	0.99406	1.04307	1.05774	1.07093	1.03725	1.07766	0.97806	1.03887	1.10805	1.03402	1.01476	1.04564	1.00018	1.01798	1.01994	1.0212	1.07545	1.06027	1.05503	0.98401	1.02232	0.9227	1.03329	1.03749	0.9836	0.95618	1.02966	1.03615	1.00422	1.01967	0.95262
	48	1.16437	1.13134	1.13516	1.18355	1.09776	1.08707	1.06199	1.09519	1.09578	1.12579	1.05303	0.97618	0.8941	1.00936	0.8599	0.90477	0.96312	0.9854	1.03708	1.06181	1.07342	1.04357	1.06784	0.96994	1.03273	1.09714	1.03272	1.01241	1.04736	0.99961	1.01346	1.02333	1.01466	1.07187	1.04808	1.03936	1.01805	1.02821	1.03067	1.02447	1.03792	0.9777	0.94668	0.97596	1.02109	0.95433	0.99871	1.02494
	48.5	1.15566	1.12178	1.1131	1.17521	1.10542	1.06605	1.05347	1.07763	1.08032	1.1202	1.0487	0.97234	0.88581	1.01675	0.85765	0.90676	0.95165	0.98702	1.02912	1.06026	1.07055	1.04011	1.0622	0.97071	1.03793	1.09523	1.02707	1.00672	1.04656	0.9958	1.01054	1.02403	1.01862	1.0571	1.04431	1.01585	1.00389	0.99442	1.02389	0.99384	1.04147	0.96731	0.94566	1.01267	1.01558	1.00733	1.00751	1.02624
	49	1.1496	1.1147	1.11847	1.17369	1.10693	1.07741	1.05086	1.07443	1.08416	1.10648	1.0422	0.97092	0.88533	1.00752	0.86165	0.89931	0.94448	0.97616	1.03603	1.04655	1.06714	1.0303	1.06374	0.96236	1.03522	1.09455	1.02798	1.0091	1.04904	0.99413	1.00736	1.01991	1.01819	1.07698	1.0673	1.03122	1.05154	1.00368	1.02508	1.04137	1.04906	0.98067	0.93595	1.08161	1.05885	0.99011	0.99227	0.99711
	49.5	1.14154	1.11479	1.12156	1.16755	1.10394	1.06808	1.05135	1.08634	1.07466	1.1272	1.02664	0.96712	0.8816	1.00304	0.85701	0.89699	0.94026	0.98241	1.02421	1.0567	1.06342	1.0281	1.05392	0.96183	1.03102	1.08206	1.02004	1.00705	1.03727	0.99392	1.01185	1.01569	1.01695	1.07506	1.04586	1.02027	1.06044	0.97674	1.04284	1.03257	1.08271	0.97614	0.92943	1.11444	1.0075	0.99098	0.9956	1.0288
	50	1.15059	1.10812	1.11392	1.16038	1.08491	1.06436	1.04442	1.0722	1.0739	1.10827	1.03219	0.96864	0.87343	1.00805	0.8529	0.8959	0.94624	0.9827	1.03195	1.04377	1.06423	1.02763	1.06868	0.96688	1.02608	1.08142	1.02139	1.00012	1.04339	0.99351	1.00657	1.01793	1.01119	1.06481	1.03576	1.06271	1.03742	0.97994	0.98263	1.00012	1.03464	0.96946	0.9412	1.03532	1.04171	0.98182	1.0122	1.01445
	50.5	1.13545	1.10077	1.10656	1.16198	1.0863	1.06111	1.04787	1.08423	1.06529	1.11444	1.03021	0.95771	0.8775	0.9916	0.84488	0.90249	0.94781	0.99081	1.02848	1.05776	1.05953	1.03204	1.05766	0.96224	1.02081	1.0792	1.01539	1.0053	1.02481	0.99066	1.01089	1.01396	1.00846	1.0782	1.02675	0.99421	1.04938	0.9797	1.01868	1.0163	1.04775	0.96216	0.99452	1.0023	1.06911	0.98503	0.96703	1.08708
	51	1.14599	1.09577	1.09921	1.15893	1.08413	1.05297	1.03819	1.07995	1.05455	1.09401	1.02415	0.9579	0.86808	0.9968	0.84447	0.89118	0.93815	0.9761	1.0214	1.06145	1.06237	1.04001	1.05283	0.95124	1.01911	1.07378	1.01017	0.99833	1.03005	0.98514	1.00406	1.01118	1.00182	1.0546	1.0265	1.03032	1.01455	1.00614	1.04842	1.01263	1.04363	0.97476	1.0107	1.03748	1.05379	0.99394	1.01902	0.98231
	51.5	1.13688	1.08157	1.08607	1.16087	1.07252	1.05232	1.03877	1.07008	1.0598	1.09182	1.02435	0.95564	0.87718	0.99422	0.84746	0.89716	0.9261	0.97103	1.0155	1.03534	1.05656	1.04153	1.0522	0.95035	1.01544	1.07428	1.00526	0.99582	1.01544	0.98574	1.00145	1.00811	0.99605	1.07572	1.05912	1.01515	1.00911	0.98994	0.95746	1.02023	1.05579	0.97077	0.9179	1.02758	1.0093	0.98934	0.98774	1.057
	52	1.12846	1.0797	1.10043	1.15585	1.06685	1.05103	1.03349	1.07217	1.05924	1.09901	1.01563	0.95346	0.87687	0.97063	0.84808	0.88557	0.92592	0.97317	1.02276	1.0389	1.05352	1.02915	1.04878	0.95096	1.01727	1.06931	1.01786	0.9915	1.02144	0.98193	0.99597	1.00657	1.00232	1.05709	1.02708	0.9822	1.05203	0.99631	1.00579	1.01515	1.03151	0.98903	0.99201	0.98723	1.01127	1.0184	0.98487	0.9918
	52.5	1.12873	1.08664	1.08341	1.14074	1.07431	1.04287	1.02201	1.06589	1.04555	1.10196	1.01907	0.94918	0.87257	0.99145	0.83937	0.88631	0.92435	0.96904	1.02288	1.03828	1.04985	1.02956	1.05082	0.95384	1.00509	1.07346	1.01019	0.99057	1.01814	0.97446	0.99923	0.99978	0.99814	1.07242	1.04772	1.00671	1.03771	0.9427	1.01589	0.99821	1.03752	0.96465	1.02003	1.08532	1.00487	1.00549	1.0127	1.01408
	53	1.11501	1.06881	1.08336	1.13588	1.06467	1.03886	1.02107	1.05215	1.0517	1.07047	1.01498	0.94437	0.86547	0.99726	0.83036	0.88493	0.92004	0.96521	1.01474	1.03332	1.04633	1.02688	1.03515	0.95064	1.0145	1.06775	1.00361	0.98865	1.00908	0.97205	0.99437	0.99818	1.0012	1.05969	1.03916	1.01887	1.04552	0.96656	1.01789	1.00103	1.04408	0.939	0.93259	1.05096	0.97306	1.00447	1.00864	1.02007
	53.5	1.10615	1.07003	1.08591	1.13574	1.06572	1.03941	1.03092	1.04324	1.04595	1.08647	1.01834	0.94413	0.8687	0.97762	0.8456	0.8783	0.92264	0.96215	1.00787	1.04128	1.0447	1.02738	1.04515	0.95288	1.00696	1.0689	1.00276	0.98559	1.01313	0.97874	0.98981	0.99309	0.99247	1.05939	1.04973	1.00086	1.01118	0.99557	1.0048	1.03362	1.0284	0.96668	0.95471	1.04832	1.03801	0.94741	1.00601	1.0686
	54	1.09424	1.06094	1.07318	1.12349	1.06015	1.03295	1.02163	1.0462	1.04094	1.05633	1.00171	0.94059	0.87509	0.97118	0.83124	0.884	0.91724	0.96116	1.00903	1.03545	1.0534	1.0203	1.03445	0.94683	0.99487	1.06266	0.99478	0.98384	1.00177	0.96887	0.98367	0.99196	0.98982	1.07588	1.03038	0.9937	1.02107	0.99927	0.97391	0.99944	1.02564	0.96247	0.95664	1.06509	0.9914	1.00405	0.97162	1.00842
	54.5	1.1067	1.06763	1.07497	1.11466	1.05398	1.02659	1.01432	1.04516	1.03566	1.07139	1.00336	0.94049	0.86572	0.9884	0.83828	0.87655	0.91679	0.96173	1.00379	1.03658	1.04495	1.0196	1.02672	0.94028	0.99875	1.05723	0.99985	0.98058	1.00111	0.97088	0.98488	0.98676	0.98933	1.05987	1.02471	1.01191	1.02473	1.01997	1.0276	1.00614	1.00818	0.95869	0.95801	1.1045	1.02665	1.01578	1.05502	0.99407
	55	1.10104	1.0607	1.07089	1.12227	1.04225	1.02633	1.02865	1.04748	1.03392	1.06651	1.0025	0.93794	0.84782	0.96727	0.82475	0.87747	0.90512	0.96028	0.99554	1.03026	1.03597	1.02173	1.03708	0.93384	0.9964	1.05329	0.99451	0.97871	1.00762	0.96903	0.97964	0.98656	0.98921	1.0637	1.03807	0.98286	1.03695	0.96545	1.05067	1.03748	1.01477	0.92762	0.97648	1.01098	1.01959	1.01682	1.0248	0.98179
	55.5	1.10044	1.0493	1.06565	1.11481	1.04818	1.0245	1.01095	1.04393	1.02325	1.06336	0.99749	0.93204	0.85792	0.94744	0.82303	0.87251	0.91036	0.96317	0.99962	1.02839	1.02903	1.02502	1.02326	0.94245	0.99184	1.05497	0.99265	0.97051	1.00755	0.96355	0.9828	0.98061	0.98258	1.06249	1.02121	1.01593	1.05999	0.9467	1.01383	1.01985	1.04281	0.92222	0.89042	1.08661	1.01948	0.96375	1.03002	1.0065
	56	1.0919	1.0514	1.07032	1.10327	1.04388	1.02053	1.00703	1.04248	1.02404	1.06013	0.98867	0.93495	0.84785	0.96257	0.82585	0.87446	0.91351	0.95927	1.0099	1.02194	1.02926	1.01736	1.02208	0.94518	0.99058	1.05077	0.99124	0.9755	1.00321	0.96521	0.98151	0.98426	0.98083	1.07738	1.04013	0.99827	0.98434	0.9893	0.97876	1.00497	1.04346	0.95214	0.88071	1.00539	1.04947	0.978	1.03221	0.98807
	56.5	1.0833	1.05465	1.05935	1.10523	1.03826	1.02047	1.00137	1.035	1.02034	1.04125	0.9952	0.92856	0.84445	0.9579	0.8269	0.87713	0.90445	0.95689	1.00302	1.01515	1.02914	1.0138	1.02057	0.93706	0.98353	1.04295	0.99052	0.97156	0.9942	0.95249	0.97705	0.9808	0.97614	1.0646	1.01258	0.98217	1.04135	0.92373	1.04895	0.99532	1.02267	0.93585	0.96402	1.02378	1.082	0.97063	1.02157	1.02306
	57	1.08736	1.04215	1.06427	1.09289	1.02804	1.013	1.00444	1.03541	1.01839	1.06179	0.99627	0.92917	0.85644	0.94627	0.82002	0.8582	0.91811	0.94663	1.00168	1.01574	1.02311	1.00943	1.02247	0.93125	0.98708	1.04355	0.98825	0.96897	0.99974	0.95623	0.98095	0.97701	0.97878	1.07083	1.03062	1.02756	1.02967	1.01781	1.00627	1.01041	1.0324	0.95446	0.97033	1.07323	1.00289	0.99878	0.98366	1.01796
	57.5	1.07667	1.03796	1.0531	1.09071	1.03456	1.01538	0.99769	1.01903	1.00815	1.02845	0.98892	0.92417	0.84851	0.95481	0.81739	0.86977	0.90369	0.95482	0.98969	1.04193	1.03134	1.01013	1.0178	0.92989	0.97731	1.04005	0.98194	0.96638	1.00226	0.95132	0.97469	0.96939	0.97338	1.0734	1.05275	1.01174	1.02796	0.97824	1.01496	1.00365	1.00864	0.94803	0.98782	1.0526	1.03992	0.93384	1.02416	1.00159
	58	1.07116	1.03523	1.04459	1.09607	1.02442	1.01904	0.98257	1.0252	1.01431	1.02597	0.98198	0.92189	0.84546	0.9496	0.81575	0.86238	0.88755	0.95336	0.9934	1.01388	1.02339	1.0121	1.01665	0.93466	0.98405	1.03486	0.98305	0.96694	0.98966	0.94937	0.97243	0.97006	0.97093	1.06993	1.04513	1.00283	1.04651	1.0137	1.00765	1.01752	1.02565	0.96202	1.04072	1.01814	1.0473	0.99837	1.00374	1.03632
	58.5	1.06543	1.04526	1.04748	1.08481	1.03306	1.0262	0.98383	1.01994	1.01456	1.03117	0.98022	0.9183	0.83984	0.93702	0.81369	0.85882	0.88867	0.9493	0.99551	1.00784	1.01455	1.01147	1.007	0.92332	0.97252	1.03682	0.98425	0.96481	0.98495	0.94734	0.97632	0.96779	0.9768	1.06865	1.03101	0.97489	1.0062	0.96148	0.96835	1.03901	1.01103	0.96846	0.94803	1.02894	1.04972	1.01737	0.99399	1.0262
	59	1.07413	1.03224	1.03741	1.08249	1.01773	1.01777	0.97655	1.01498	1.01648	1.02144	0.96486	0.9181	0.84052	0.95562	0.8319	0.86152	0.9085	0.95051	1.00232	1.01642	1.02197	1.01287	1.01021	0.92617	0.97432	1.03853	0.98227	0.96147	0.99152	0.94788	0.97207	0.96062	0.97147	1.05814	1.0377	1.01021	1.04301	0.99587	0.95481	1.03712	0.99004	0.97948	0.98596	1.0975	0.98191	1.00444	1.02818	0.98724
	59.5	1.06053	1.02597	1.02306	1.06983	1.01628	0.99701	0.97385	1.00408	1.00682	1.0206	0.97888	0.92021	0.84046	0.94168	0.81197	0.8588	0.89612	0.95179	0.9817	1.01255	1.01876	1.01137	1.01457	0.92425	0.97417	1.03388	0.97956	0.96173	0.98945	0.94679	0.97366	0.96253	0.96892	1.06041	1.03324	1.02095	1.09121	0.97284	1.02327	0.99714	1.00687	0.96465	0.96905	1.06358	1.01634	0.9905	0.97833	1.02793
	sec
AM251	-10	1.01738	1.01278	1.00825	1.01937	1.00806	1.01931	1.00485	1.01688	1.02317	1.00373	1.02725	1.02147	1.01389	1.02431	1.04672	0.99131	0.99889	0.98869	1.00248	1.01328	0.99801	0.99682	1.02699	1.02307	1.01859	1.01533	1.01946	1.00263	1.01587	1.00293	1.01658	1.00982	1.00279	1.04055	1.01407	0.98423	1.04005	1.00872	0.96299	1.00618	1.01586	1.00495	0.98211	0.99156	0.973	0.9579	0.96844	1.06224
	-9.5	1.00461	1.00665	1.01053	1.00798	1.00702	1.01869	0.99619	0.98611	1.01025	0.99384	1.01267	1.00699	1.00891	0.99327	1.02735	0.98255	1.01311	0.99375	1.01759	1.00547	0.98284	0.9948	1.02462	1.0148	1.00643	1.01221	0.99901	1.00757	1.00725	1.00501	1.01283	1.0115	0.99394	1.02907	1.00995	1.03309	1.04466	1.02507	0.9805	0.99787	1.02397	0.98531	1.01078	0.93865	1.0502	0.97417	1.01314	1.03759
	-9	1.00347	1.01405	0.99609	1.00161	1.00711	0.99133	1.00276	1.0063	0.99832	0.99018	1.00438	1.00567	1.01022	0.9942	1.03448	0.99769	1.01174	0.9997	1.0081	1.03032	0.99897	0.98759	0.99155	1.00369	1.00287	1.013	0.9955	1.00082	1.00401	0.99245	1.00752	1.00839	1.00044	1.01558	1.03612	1.01105	1.02559	1.00215	0.9205	0.98082	0.99759	1.01247	1.0073	1.02158	1.01332	0.9838	0.98755	1.07349
	-8.5	1.00057	1.00498	1.00231	1.01336	1.01158	1.00506	0.99609	0.99149	0.99885	0.97531	1.00207	1.00299	1.01365	1.02708	1.01886	0.9952	0.99452	0.99528	0.99492	0.98332	0.99543	0.98857	1.01219	1.00139	0.99927	1.00524	0.99913	0.99993	1.00762	0.98856	1.00469	1.00725	0.99367	1.02279	1.03078	1.02507	1.03513	0.97563	0.92842	0.98767	0.97428	1.01189	0.93446	0.99997	0.99981	0.95096	1.03239	0.98104
	-8	1.00091	1.00156	1.00138	0.99926	1.00467	1.00708	0.99287	0.98324	0.99896	0.97419	1.00051	1.00267	1.01117	0.99659	1.02268	0.9765	0.99321	0.99862	1.00659	1.00369	0.99039	1.00063	1.00273	1.00486	0.99931	1.00415	1.00898	1.00051	1.0037	1.00261	1.00888	1.0081	0.99175	1.03228	1.03248	1.02693	1.04884	0.97279	0.97941	0.98939	1.00911	1.00713	0.9925	0.97282	1.00169	0.9604	0.95494	0.99864
	-7.5	0.9993	1.00898	0.99844	1.00702	1.00968	1.00498	0.9895	0.98964	1.0084	0.96526	1.00826	1.00288	0.99597	0.99381	1.01888	0.98859	1.01294	0.99734	0.99855	1.01199	1.00105	1.00019	1.01038	1.01206	1.00419	1.00179	1.00725	1.00613	1.00202	0.99969	1.01009	1.0096	0.98836	0.99801	1.00619	1.00677	1.0235	1.00408	0.96685	0.99001	1.00549	1.00601	1.05228	0.93041	0.97289	0.99432	0.98401	1.01453
	-7	0.99947	1.00177	0.99422	0.99774	1.01065	1.01182	0.99567	0.99671	1.01411	1.01255	1.00341	0.991	1.00045	1.01458	0.99599	0.98792	1.00571	0.97477	1.00772	1.01703	1.00427	0.99899	0.99343	1.01203	1.02294	1.00852	1.00451	0.99663	0.99935	0.99	1.01185	1.00309	0.98679	1.0109	0.98666	1.05009	0.97291	0.99233	0.97839	0.97241	1.01753	1.01948	1.02423	0.97873	1.02585	1.00268	0.98758	1.07093
	-6.5	0.99394	1.00142	1.00637	1.00023	1.01004	0.99188	0.98414	0.99777	1.00568	0.98458	1.01166	0.99554	1.01175	1.00065	1.01247	0.99451	0.99001	0.98705	0.99866	1.01289	1.00126	1.00619	1.00443	1.01407	1.00907	1.01227	0.99866	1.00098	1.00566	1.00295	1.01118	1.00256	1.0008	1.0125	1.02395	1.01673	0.99652	0.98825	0.9347	0.98213	0.9889	0.99075	0.94843	0.99782	0.99281	0.98741	1.03882	1.05438
	-6	1.01223	1.00921	0.99589	0.99859	1.01343	1.00062	0.99814	0.99106	1.00724	0.97997	1.00987	1.00363	1.01272	1.01354	1.00265	0.98665	0.99107	0.98378	0.99621	1.01022	0.99722	0.99533	0.99738	0.99863	1.00433	1.00483	0.99974	1.00131	0.99264	0.99233	1.01419	1.00465	0.99146	1.00385	1.0165	1.01685	1.02874	1.003	0.9542	0.98973	1.02407	1.0014	0.93401	1.01044	0.96356	0.99551	1.02662	0.99217
	-5.5	1.00218	0.99791	1.01054	1.00481	1.00878	0.99646	0.99946	1.00307	1.0143	0.99479	1.00439	1.0058	1.00984	1.02377	1.00978	0.99199	0.9997	0.97713	1.0053	1.02067	0.99998	0.99971	1.01114	1.01252	0.9965	0.99668	0.99525	1.00247	0.98977	0.99094	0.99927	1.00579	0.98989	1.00564	1.00861	1.02894	1.04996	1.02891	0.94236	0.98522	0.99264	0.99077	0.9935	0.95453	0.97781	0.98106	1.00191	1.03576
	-5	0.99162	0.9955	1.00476	0.99229	1.00645	1.01089	0.99534	0.99845	1.00369	1.00762	1.01051	1.0024	0.99317	0.99388	1.01817	0.98187	0.97833	0.98966	0.97871	1.01323	0.99459	0.99913	1.00162	1.00741	1.00505	1.0004	0.99994	0.99192	0.99583	0.99728	1.00575	1.00629	0.99528	1.00288	1.01492	1.0134	0.99374	1.01033	0.92833	1.00035	0.99874	1.04726	1.01089	1.01365	1.01239	1.027	1.03979	1.02792
	-4.5	0.99468	0.99237	1.00796	0.9962	1.00968	1.01451	0.99681	0.99988	1.01104	0.98402	1.00353	0.99263	0.9993	0.98205	1.01343	1.00249	0.99209	0.98703	1.00333	1.01683	0.99402	1.00171	1.00529	1.00814	0.99881	0.99709	0.99767	0.99962	0.98807	0.996	1.01662	1.00135	0.99737	1.01072	0.99496	1.00934	0.99548	0.99667	0.98404	0.96909	0.97863	1.01852	1.02354	1.04978	0.94161	0.96592	0.9635	1.0526
	-4	1.00348	1.0114	1.00391	1.00151	1.01346	1.00369	1.0127	1.00595	1.00274	1.00733	1.00067	1.00853	1.00032	1.01508	1.01206	0.99412	1.00103	0.9998	1.00234	1.00963	0.99512	0.99831	0.99985	1.01673	1.00571	1.00559	1.00373	0.99893	1.00011	0.9993	1.00639	1.00347	1.0032	1.00597	1.02723	1.04361	1.07015	0.95922	0.92244	0.97876	0.99586	0.99005	0.97635	1.03936	0.99166	0.93105	0.96693	1.01953
	-3.5	0.99798	1.0038	1.00469	1.00226	1.0106	1.01849	1.00308	1.00223	1.00883	1.00757	1.00621	1.00551	1.0163	1.01698	1.01982	0.9877	1.00473	0.99398	0.9946	1.00058	1.00329	1.00041	1.0054	1.00191	1.0099	1.00014	1.00053	1.00387	1.00489	1.01035	1.00637	1.00209	0.9961	1.00707	1.01029	0.9876	1.03647	0.97979	0.97357	0.96342	1.00713	0.99065	1.03576	0.99532	0.98212	0.94597	1.07205	0.99771
	-3	0.99591	0.99398	1.00641	0.99291	1.00523	1.01586	1.00728	0.99618	1.00276	0.98418	1.0179	0.99473	1.00387	1.00518	0.99399	1.00406	0.9947	0.98908	0.99792	1.0014	0.99885	1.00373	0.9959	1.0113	1.00756	1.00164	0.99435	0.99549	0.99696	1.00875	1.00953	1.00428	0.9993	1.00415	0.97117	1.01117	1.03037	0.92899	0.97768	0.99083	1.00034	0.96226	1.04148	1.00108	0.99226	0.97848	1.05618	1.05687
	-2.5	0.99956	1.01145	1.00251	1.00018	0.99896	1.00825	1.00438	1.01128	1.01511	0.98323	1.00759	1.0086	1.01081	0.99822	1.00428	1.00423	0.99378	0.99409	1.01438	0.99572	0.99803	1.00252	1.0087	1.01676	1.01438	1.00256	1.00596	0.98937	0.99941	1.00068	1.00377	0.99358	1.00704	0.99872	0.98916	1.01835	1.03568	1.01364	0.9641	0.97689	0.98002	0.98933	1.0425	0.99636	0.99364	0.98178	1.02271	0.98383
	-2	1.0134	1.00158	0.99682	0.99313	0.99863	1.00111	0.99131	0.99832	1.00087	1.03053	1.00166	1.00154	1.00965	0.97291	1.00619	1.00546	0.97997	1.00057	1.00619	1.00038	0.99634	1.00661	0.99899	1.00995	1.00511	0.99865	0.99894	0.99793	1.00489	1.0024	1.00327	0.99486	0.99204	0.99349	1.0112	0.99516	1.01826	0.98433	1.04378	1.00711	1.00276	0.98764	0.95722	1.00355	1.03362	1.04455	0.94585	1.00676
	-1.5	1.00205	1.004	1.00345	0.99339	0.99467	0.99717	1.00417	0.99603	0.99979	0.99797	1.00641	0.99401	1.00919	0.99065	1.01305	0.98726	1.01548	0.99013	1.00773	0.99926	1.00017	1.00185	1.00968	1.02687	1.00751	1.00573	1.00366	1.00077	0.99607	1.01169	1.01261	1.00182	1.01654	0.99241	0.99997	0.99293	0.99059	0.98568	0.97298	1.00687	1.016	1.01321	0.96585	1.02873	1.01666	1.02089	0.98959	0.99798
	-1	1.01028	1.00852	1.01569	1.00018	0.9884	0.99926	1.00727	0.99595	0.99909	0.99236	1.00405	0.99517	1.0105	0.99955	1.01666	0.9978	1.0244	1.01197	1.01285	0.99817	1.00793	0.99741	0.9946	1.01137	1.00044	0.99834	1.00588	1.00395	1.00298	1.00012	1.00123	1.00141	1.00155	1.01604	1.00034	0.99423	0.95614	1.01702	1.01981	1.0098	1.0019	1.01049	1.0351	0.97203	0.95674	0.95345	1.04252	1.0121
	-0.5	0.99932	1.00051	1.00358	1.00804	1.01139	1.01357	0.99889	1.00818	1.01006	1.01428	1.0039	1.00574	0.99833	0.99421	0.99138	0.99962	0.9903	0.99234	0.99485	0.99654	1.00005	0.9978	0.99747	0.995	1.00109	1.00188	0.99884	1.00066	0.99894	1.00053	1.00403	1.0003	1.00565	1.01399	1.00445	1.02509	1.05186	0.9904	0.9825	0.95848	1.02247	1.03669	0.97437	0.99837	1.0082	0.98646	1.03207	0.95406
	0	0.99817	1.00085	0.99883	0.99815	0.99467	1.00895	1.00725	1.01807	1.0019	1.00304	1.00152	1.00023	1.01615	1.00236	1.01379	0.9896	0.98772	0.99378	0.99828	0.99632	1.00223	0.99644	1.00275	1.00175	1.0115	0.99688	0.99171	1.00079	1.0066	1.01004	1.00753	0.99545	0.99764	1.01824	0.99629	1.01989	1.01867	0.96814	1.02126	1.00243	0.99303	0.99548	1.00946	0.97424	1.02567	0.98558	1.0627	1.06139
	0.5	0.99557	1.00575	0.99704	0.99632	1.00252	1.00473	0.9881	1.00218	1.00753	0.98894	0.97951	0.99293	1.00792	1.00021	1.00431	0.99073	0.9952	1.00397	0.99028	1.01752	0.99576	1.00217	0.99328	0.99848	0.99184	1.00599	0.99536	0.99111	0.99926	1.00133	1.00756	0.98994	0.99713	0.99596	1.0003	1.02219	1.0303	0.99945	0.91373	1.00041	1.02671	0.99267	1.0012	1.02384	1.01	1.00937	1.04655	0.99669
	1	1.00026	1.00212	1.00438	1.00189	1.00428	1.00632	1.00661	1.00525	1.00379	0.98452	1.00674	1.00172	1.01813	0.99826	1.01181	0.99664	0.98241	1.02052	1.00431	1.00102	0.98377	1.00376	0.99963	0.99365	0.99595	1.00037	1.00214	1.00499	1.00074	1.00107	1.00167	1.00148	0.99317	0.99043	1.03045	1.00475	0.97847	0.94147	1.01592	0.99661	0.99464	0.9802	0.99979	0.9737	1.00159	0.94683	1.0533	1.05753
	1.5	1.00722	1.00306	1.01205	1.00651	1.01725	1.01128	1.01496	1.00435	1.00971	1.0049	1.01325	1.01975	1.00613	0.99305	1.00984	0.99447	1.00742	1.01075	1.00501	1.0314	0.99979	0.99973	1.00055	1.00505	1.00419	1.00253	1.00194	1.00014	1.0037	1.00822	1.00962	0.99358	0.99532	0.98609	0.99699	1.00643	1.07655	0.98316	1.01159	0.99864	0.99839	0.96301	0.97483	0.93864	1.01284	1.02094	1.01683	1.02014
	2	1.01767	1.01478	0.99966	1.01258	1.01529	1.02367	1.02598	1.01494	1.01325	1.00944	1.01828	1.02503	1.0225	1.00021	1.02605	1.01021	1.02157	1.03935	1.01699	1.01988	0.99357	1.00351	1.00514	0.98944	0.98937	0.99449	0.99029	0.99422	0.99153	0.9966	1.00505	0.99789	0.99141	0.99788	1.01706	0.97979	1.07689	0.97994	1.03467	0.98635	1.04193	0.97812	0.99959	1.04285	0.97726	1.02934	1.09174	1.03558
	2.5	1.01513	1.00669	1.02463	1.01943	1.0168	1.00914	1.02272	1.01701	1.02021	1.00237	1.01839	1.02354	1.03161	1.01807	1.01395	1.03546	1.01175	1.0001	1.0369	1.03497	0.99338	0.98915	0.99748	0.99427	0.9934	1.00116	0.99549	0.9981	1.00297	1.00451	1.01203	1.00823	0.99863	1.00904	0.9915	0.99163	1.01764	0.95108	1.08712	1.01332	0.99535	0.95856	1.0738	0.96087	1.01582	1.00145	1.06613	1.01119
	3	1.01657	1.02083	1.01902	1.01864	1.02598	1.02715	1.02096	1.02858	1.0182	1.02138	1.02674	1.02488	1.02946	1.03838	1.02212	1.02505	1.02113	1.02285	1.02756	1.04067	0.99859	0.99489	1.00014	0.98706	1.0008	1.00959	0.99702	1.00195	1.01047	1.00656	1.0015	1.01215	0.99809	0.98667	0.99561	0.99992	1.04299	0.99036	0.9764	0.98588	1.04154	0.97459	1.02836	1.01181	0.92087	0.98518	1.05623	0.92462
	3.5	1.02931	1.02555	1.03401	1.03001	1.018	1.02807	1.02445	1.02216	1.03203	1.01967	1.01798	1.01762	1.04301	1.01651	1.03565	1.02377	1.00052	1.02407	1.06651	1.05807	0.99127	0.99416	0.99731	0.98956	0.99733	1.00693	0.98638	1.00412	0.98813	0.99975	1.00737	1.01008	0.99823	1.01139	1.00461	0.97726	1.03565	0.95699	0.93514	0.9844	1.03201	0.99328	0.95252	1.03223	0.97965	1.04226	1.02937	1.00553
	4	1.03234	1.03333	1.0335	1.03287	1.03179	1.02566	1.03129	1.025	1.03918	1.0152	1.03151	1.02877	1.04044	1.03418	1.04559	1.04194	1.00073	1.01768	1.06531	1.07858	0.98905	1.00139	1.00219	0.9978	1.00782	0.99852	0.98827	0.99378	1.0026	1.00022	1.00179	1.00185	0.99175	0.98324	0.9771	0.98731	0.97125	0.98228	1.02116	1.01724	1.02888	0.98232	1.03023	1.029	1.00079	0.98139	1.06341	1.01681
	4.5	1.04715	1.03916	1.03876	1.02911	1.03639	1.05032	1.04699	1.03084	1.04745	1.04793	1.03759	1.03575	1.04861	1.0323	1.05121	1.04734	1.03738	1.02985	1.09714	1.08245	0.99908	0.99972	1.00181	0.99946	1.00836	1.00708	0.98599	0.99778	0.99339	1.00866	1.01612	1.00751	1.00591	0.9998	0.97994	0.9551	1.05247	1.01758	1.0144	0.99224	1.02142	0.98186	1.04302	1.04477	0.99671	0.9995	1.04884	1.03838
	5	1.05018	1.05384	1.04493	1.03893	1.04713	1.05424	1.04349	1.03505	1.04522	1.05087	1.03578	1.0401	1.05361	1.01366	1.04189	1.03885	1.03832	1.01792	1.08947	1.05963	0.98688	0.99296	0.98811	0.97588	0.99306	1.00299	0.98072	0.98617	0.98496	0.99305	0.99618	1.00623	0.99143	0.99939	1.01537	1.00182	1.03938	0.97427	0.96663	1.00879	1.01835	0.95486	1.08235	0.94022	0.99426	1.03207	1.10524	1.0742
	5.5	1.06167	1.05345	1.0544	1.04047	1.04419	1.06039	1.05673	1.04264	1.0504	1.07004	1.03247	1.0483	1.05714	1.02329	1.06798	1.06393	1.04751	1.03507	1.09951	1.0879	0.99873	0.9861	0.98394	0.99766	1.00748	1.0064	0.98714	0.9935	1.00448	1.00027	1.02082	1.01563	1.00007	1.01468	1.00727	0.98772	1.04152	1.00344	0.98521	0.98358	1.03985	0.95294	1.02896	1.0382	0.97952	1.03564	1.08222	1.01558
	6	1.06984	1.07973	1.06597	1.05331	1.05453	1.06676	1.06793	1.04766	1.06817	1.0595	1.04865	1.05443	1.05987	1.02914	1.05808	1.04379	1.02355	1.06686	1.11757	1.08985	1.00067	0.99757	1.00152	1.00546	1.01007	1.01881	0.98777	1.00052	1.00731	1.01118	1.0228	1.01207	1.00955	1.01617	1.00352	0.97717	1.05741	0.98195	0.95419	0.99771	1.01913	0.98387	1.104	1.0189	1.01169	1.07558	1.08811	1.01373
	6.5	1.07827	1.08682	1.07237	1.05847	1.07073	1.05791	1.06823	1.05475	1.05443	1.09204	1.05234	1.05859	1.05666	1.03865	1.0614	1.0625	1.00342	1.06519	1.12025	1.10334	1.00268	0.99818	1.00471	0.99267	1.00564	1.01779	1.00216	0.98883	1.00151	0.99507	1.02683	1.00955	1.008	1.006	0.99373	0.9953	0.98491	0.99147	1.07207	0.97918	0.98702	0.95666	0.978	0.99115	1.04526	1.01351	1.06716	1.03688
	7	1.08396	1.08846	1.08197	1.06392	1.08399	1.07566	1.08152	1.05906	1.07038	1.07701	1.05726	1.06525	1.07502	1.05329	1.06525	1.06304	1.05441	1.07104	1.15085	1.11156	1.00682	0.98182	0.99527	1.01209	1.01174	1.02157	0.99405	1.0037	1.00887	1.00849	1.02109	1.01048	1.01246	1.00686	1.01592	1.01471	0.97619	0.98943	1.07659	1.01983	1.04954	0.9993	1.04433	0.96105	1.01307	1.02697	1.12666	0.97675
	7.5	1.10141	1.0909	1.09776	1.0639	1.08108	1.08103	1.08551	1.07122	1.08186	1.08176	1.07629	1.08461	1.07497	1.06445	1.05604	1.08656	1.05518	1.07027	1.16686	1.11946	1.00796	0.99435	0.99677	1.00454	1.01264	1.02123	1.00288	1.00691	1.01364	1.01297	1.03647	1.01839	1.01525	1.01585	1.00638	1.00422	0.97061	0.98631	1.03869	0.98357	1.02378	0.96574	1.00373	1.06138	0.97583	1.03452	1.07301	1.03047
	8	1.1046	1.09661	1.08675	1.07925	1.08889	1.08546	1.0885	1.08161	1.08081	1.12261	1.072	1.07321	1.08474	1.06841	1.06579	1.07673	1.05133	1.08854	1.17281	1.11713	1.01566	0.99085	1.01378	0.99605	1.01475	1.02703	1.00117	0.99947	1.01838	1.01672	1.02554	1.02027	1.01205	1.0087	0.99347	0.99375	0.95909	0.9616	1.04234	0.99207	1.05193	0.95745	1.05314	1.00261	1.01044	1.03339	1.06404	1.02467
	8.5	1.11303	1.11943	1.11775	1.08727	1.09647	1.09953	1.10423	1.09042	1.09035	1.11264	1.0693	1.09582	1.10764	1.0773	1.07689	1.07998	1.09478	1.09133	1.158	1.12242	1.01715	0.99265	1.00617	0.98854	1.02095	1.03328	1.00153	1.00039	1.0206	1.01374	1.03322	1.02339	1.02804	0.9912	0.99099	0.99248	0.99728	0.98815	0.98324	0.97643	1.0397	0.9979	1.02715	1.00437	0.97532	1.03584	1.09741	1.12175
	9	1.11794	1.11896	1.11486	1.08652	1.10077	1.08995	1.11496	1.08189	1.10206	1.11708	1.07312	1.0977	1.10466	1.07275	1.09992	1.09919	1.07075	1.09466	1.17495	1.12667	1.02423	0.99724	1.0253	0.99137	1.02242	1.0364	0.99774	1.00813	1.02993	1.03	1.03743	1.02671	1.02817	1.01055	1.00412	1.00899	1.03619	0.95984	0.99374	0.98014	1.0537	0.99156	1.05473	1.0075	0.98347	1.03919	1.0472	1.03334
	9.5	1.12602	1.12424	1.11606	1.09336	1.10488	1.09455	1.10807	1.09574	1.10033	1.11897	1.07594	1.10864	1.09429	1.08932	1.10152	1.08766	1.06064	1.10957	1.16951	1.14152	1.03566	1.00844	1.03835	1.00728	1.03124	1.04904	0.99922	1.01444	1.01691	1.0247	1.03932	1.02769	1.03833	1.01243	1.00427	1.02469	1.07068	0.97113	1.01582	0.97319	1.05379	0.98263	1.00563	1.03829	0.98982	1.05006	1.07627	1.08628
	10	1.13297	1.14396	1.13061	1.09515	1.12856	1.11848	1.12526	1.11193	1.11926	1.12329	1.08945	1.11246	1.12393	1.09405	1.09456	1.11566	1.07537	1.10231	1.19622	1.13029	1.02477	1.00441	1.02559	0.98424	1.02367	1.04431	1.00844	1.00766	1.02104	1.02854	1.03273	1.01842	1.02348	1.01499	1.00596	0.98991	1.009	0.96517	1.02552	0.99086	1.04168	1.00608	1.00088	1.00916	0.99719	1.03225	1.10312	1.04037
	10.5	1.13959	1.14326	1.13369	1.0969	1.12191	1.10704	1.12865	1.09554	1.1342	1.14758	1.09514	1.12179	1.1121	1.09937	1.10797	1.10518	1.06473	1.11158	1.2063	1.15762	1.02385	0.99994	1.05074	0.99433	1.03221	1.04839	1.01455	1.01539	1.03296	1.03681	1.0482	1.02308	1.03633	1.0124	0.98893	0.98808	1.0348	0.98699	1.10623	0.99824	1.05546	0.99237	0.98228	1.10144	0.98017	1.03734	1.10311	1.11307
	11	1.15502	1.13963	1.15182	1.10541	1.13231	1.12243	1.14609	1.12506	1.13916	1.13708	1.09649	1.13003	1.12974	1.10152	1.12202	1.11742	1.06302	1.09574	1.19678	1.16419	1.03255	1.00144	1.02324	1.00414	1.03286	1.04932	1.01375	1.01358	1.02786	1.02365	1.04088	1.03522	1.03047	1.01696	1.00727	0.98601	1.0184	0.97449	1.00972	0.98945	1.0578	0.98439	0.99608	0.97356	0.98276	1.03326	1.07204	1.11893
	11.5	1.15808	1.16664	1.14958	1.1195	1.13112	1.12102	1.15983	1.12781	1.13859	1.13766	1.09821	1.13068	1.11425	1.1071	1.13473	1.11244	1.0868	1.11498	1.20242	1.13772	1.02702	0.99596	1.03939	0.99351	1.04048	1.05582	1.00509	1.00946	1.02543	1.02697	1.05184	1.03862	1.02473	1.01243	1.00277	0.99365	1.0214	0.99945	1.01648	0.99244	1.06548	1.01377	1.05875	1.01215	1.03079	1.02281	1.18196	1.08476
	12	1.15515	1.16259	1.15791	1.11872	1.1473	1.12703	1.15049	1.12295	1.15364	1.16158	1.10625	1.14243	1.13865	1.11415	1.13049	1.12663	1.09144	1.1159	1.22329	1.15906	1.03641	1.00985	1.04575	0.9911	1.04044	1.06444	1.01533	1.01235	1.03587	1.03833	1.05384	1.04239	1.03633	1.02866	1.01418	0.99697	1.00273	0.98253	1.07854	0.97216	1.04493	0.96586	1.0548	0.97164	0.9806	1.04128	1.10038	1.1883
	12.5	1.17836	1.17539	1.15429	1.12048	1.15275	1.14834	1.1649	1.12995	1.14607	1.13207	1.12124	1.15246	1.13864	1.11018	1.1385	1.12456	1.10634	1.11891	1.22274	1.16956	1.04565	1.00394	1.0594	1.006	1.04526	1.05918	1.01308	1.01609	1.03527	1.03633	1.04333	1.0381	1.04	1.0191	1.00605	0.99123	1.02975	0.98668	1.07892	1.00734	1.07513	0.98494	0.98666	1.0588	1.04479	1.07991	1.16135	1.12498
	13	1.18576	1.17864	1.17714	1.12432	1.15834	1.16027	1.18456	1.13365	1.16559	1.1703	1.12795	1.15699	1.14573	1.12812	1.14491	1.1407	1.12817	1.1222	1.24024	1.18426	1.04955	1.00351	1.05237	0.99291	1.03775	1.06748	1.00608	1.02776	1.02506	1.03468	1.04294	1.04625	1.0315	1.04268	1.03749	1.011	1.03708	0.96423	1.02345	0.99295	1.07522	0.95947	1.03716	0.98271	1.06851	1.0484	1.11289	1.12487
	13.5	1.19306	1.19117	1.17807	1.12566	1.16314	1.16057	1.19189	1.16024	1.18198	1.1772	1.14355	1.15187	1.14181	1.11632	1.16257	1.14608	1.11224	1.11589	1.24144	1.18639	1.04003	0.99418	1.05193	0.99368	1.04814	1.06827	1.00725	1.0189	1.03759	1.04774	1.04063	1.06044	1.04127	1.02937	1.01394	0.99741	1.0203	0.98296	1.08048	1.00033	1.07904	1.0301	1.04447	0.97836	1.04205	1.00661	1.14104	1.10756
	14	1.18478	1.19839	1.17556	1.12976	1.17265	1.16661	1.19255	1.15044	1.17455	1.18192	1.12938	1.15918	1.13865	1.13507	1.14767	1.14429	1.11542	1.12542	1.24532	1.18508	1.04047	1.0028	1.04117	0.98098	1.03959	1.06194	1.01074	1.02443	1.0394	1.038	1.05589	1.05807	1.03479	1.03131	1.01761	0.99729	1.02552	0.97894	1.01545	0.97105	1.07447	0.95672	1.04878	0.97708	1.02446	1.0661	1.17247	1.12017
	14.5	1.19446	1.20703	1.19511	1.14466	1.17499	1.1676	1.20216	1.161	1.18664	1.16187	1.13486	1.1734	1.15911	1.12704	1.16263	1.15629	1.12558	1.11503	1.25209	1.18508	1.03572	1.00019	1.04971	0.98834	1.04459	1.07283	1.01151	1.02635	1.04135	1.0354	1.04769	1.0541	1.03586	1.02814	1.03685	1.00567	1.02778	0.98311	1.02454	0.97991	1.0609	0.99768	1.05415	1.07297	1.00971	1.03821	1.1128	1.11831
	15	1.20646	1.20912	1.18437	1.14072	1.18666	1.16259	1.20202	1.15127	1.20091	1.15285	1.14861	1.17635	1.15142	1.13415	1.15665	1.15258	1.12601	1.13952	1.23557	1.19425	1.03472	1.00496	1.05585	0.98675	1.05163	1.07859	1.00614	1.03609	1.04466	1.04959	1.05258	1.06031	1.03155	1.02597	1.01669	1.0114	1.00297	0.98322	1.09477	0.98455	1.06527	0.99667	1.04936	1.02142	1.00913	1.06415	1.16425	1.02684
	15.5	1.21183	1.22114	1.19879	1.14617	1.1838	1.17913	1.20753	1.16295	1.18409	1.16605	1.14593	1.18952	1.15947	1.12166	1.16006	1.15142	1.13777	1.14645	1.24204	1.18176	1.03098	0.99437	1.06094	0.98877	1.05204	1.07364	1.00903	1.0323	1.04075	1.04918	1.05459	1.06011	1.04048	1.04734	1.02428	1.03737	0.98058	0.97189	1.09565	1.00603	1.06968	0.96717	1.05673	1.0451	1.01245	1.02787	1.15099	1.01094
	16	1.22315	1.23379	1.20904	1.13607	1.19983	1.18257	1.2056	1.1608	1.20086	1.15923	1.16653	1.18364	1.15184	1.12508	1.15939	1.15421	1.14585	1.14996	1.25047	1.20427	1.04003	0.99759	1.04067	1.00403	1.05271	1.07921	1.01164	1.02818	1.04303	1.03828	1.04938	1.06171	1.03681	1.0427	1.00651	1.00921	1.02338	1.02484	1.04524	0.98851	1.09794	0.97324	0.97838	1.0164	1.00565	1.08091	1.15136	1.11432
	16.5	1.21535	1.21823	1.20561	1.14938	1.20162	1.18414	1.2155	1.16197	1.1936	1.19058	1.14109	1.19333	1.16041	1.14574	1.15809	1.15968	1.14062	1.15286	1.2382	1.2068	1.04772	1.00054	1.06353	1.01218	1.04634	1.07894	1.01579	1.02873	1.04045	1.0454	1.04894	1.06022	1.04538	1.05322	1.02593	1.01263	0.98785	0.97794	1.15084	0.98938	1.08977	0.97557	1.07137	1.02916	1.00652	1.04833	1.19564	1.17784
	17	1.2206	1.23688	1.21966	1.148	1.20492	1.19723	1.22754	1.17257	1.20851	1.18268	1.14733	1.19595	1.17305	1.14908	1.18688	1.16659	1.14871	1.16047	1.25587	1.22351	1.05437	1.00294	1.06724	0.99281	1.04221	1.08997	1.01834	1.02849	1.05822	1.05829	1.04937	1.06136	1.04219	1.03444	1.01579	1.03513	1.02432	0.99692	1.02412	1.00546	1.06985	0.96295	0.98707	0.94193	1.03303	1.08224	1.18747	1.16185
	17.5	1.22101	1.23591	1.21154	1.14792	1.21362	1.20002	1.22961	1.15516	1.20846	1.183	1.16113	1.20879	1.15814	1.1635	1.18676	1.16611	1.1728	1.12829	1.25229	1.19703	1.05283	1.00539	1.06145	1.00313	1.05666	1.08436	1.0178	1.03422	1.04249	1.0562	1.04702	1.05346	1.05019	1.0384	1.02292	1.02961	1.02696	0.96984	1.10791	1.00818	1.08967	0.98598	1.07725	1.08497	1.02944	1.06624	1.10412	1.10655
	18	1.23152	1.2445	1.21896	1.14953	1.21102	1.21393	1.2387	1.17006	1.21402	1.16853	1.18272	1.20832	1.18367	1.17934	1.19658	1.17686	1.18109	1.15174	1.23212	1.19162	1.04882	0.99723	1.07797	1.01057	1.05117	1.0808	1.00729	1.02968	1.05208	1.04339	1.03464	1.05663	1.04346	1.04341	1.02685	1.01626	1.01525	0.98263	1.04022	0.9703	1.10764	0.94579	1.07168	0.95977	1.02567	1.079	1.16436	1.16287
	18.5	1.22417	1.24644	1.2297	1.16765	1.21923	1.19716	1.24744	1.17375	1.2299	1.18042	1.17345	1.21976	1.19366	1.15442	1.22219	1.17394	1.19109	1.14675	1.25052	1.19453	1.04408	1.00601	1.05844	1.00549	1.05333	1.08035	1.01554	1.03417	1.04913	1.05462	1.0491	1.06011	1.04687	1.05102	1.03565	1.0042	1.00857	0.97346	1.07613	0.97411	1.10395	0.98127	1.03837	1.00235	1.02098	1.05573	1.21447	1.1631
	19	1.24189	1.25272	1.23727	1.17048	1.23235	1.21631	1.24683	1.17476	1.22083	1.1884	1.1835	1.23011	1.19509	1.14946	1.20279	1.18304	1.17457	1.1352	1.2376	1.18995	1.05502	1.00501	1.07296	1.02482	1.04388	1.08611	1.0235	1.02526	1.05114	1.05662	1.0417	1.06022	1.05267	1.04951	1.00645	1.01769	0.99283	0.98607	1.09161	0.96844	1.10577	0.96139	1.05102	1.02192	1.00464	1.09035	1.17593	1.15342
	19.5	1.23859	1.26623	1.24752	1.16589	1.21333	1.21366	1.25735	1.18148	1.21599	1.1686	1.18898	1.22793	1.19483	1.15199	1.20785	1.17689	1.17582	1.15535	1.24417	1.2037	1.04232	0.99886	1.05834	1.0137	1.04752	1.08747	1.01166	1.02833	1.05117	1.06191	1.04467	1.05355	1.04707	1.03606	1.01033	1.00538	1.02906	1.02932	1.08849	1.02123	1.12959	0.98368	1.08616	0.9828	1.03343	1.09458	1.19854	1.18702
	20	1.24528	1.26378	1.25663	1.15972	1.21964	1.21116	1.25129	1.18901	1.22415	1.1782	1.17556	1.23074	1.18743	1.15361	1.2057	1.15918	1.18936	1.15208	1.2475	1.20045	1.054	0.99568	1.06758	1.01542	1.04265	1.07791	1.01911	1.02912	1.05409	1.06255	1.04022	1.05727	1.044	1.03139	1.00427	0.99599	1.06057	0.99296	1.02712	0.98355	1.10705	0.96022	1.05493	1.0337	1.03872	1.07951	1.16046	1.11057
	20.5	1.23546	1.26769	1.24621	1.16089	1.22961	1.21724	1.25293	1.18976	1.23522	1.21368	1.1782	1.23992	1.20625	1.16438	1.20674	1.18	1.16695	1.14402	1.2386	1.20441	1.0488	1.00319	1.06756	1.00889	1.04721	1.08434	1.01956	1.0277	1.04142	1.05721	1.03478	1.05803	1.04613	1.06883	1.01961	0.99778	1.01644	1.01198	1.07238	1.00188	1.10376	1.00907	1.05168	1.06296	1.02646	1.06549	1.18162	1.10559
	21	1.227	1.26622	1.23899	1.14461	1.2256	1.2122	1.24975	1.17502	1.23492	1.19437	1.18563	1.21806	1.18562	1.15393	1.20433	1.17943	1.19498	1.15406	1.23124	1.19039	1.05111	0.99876	1.07362	1.01193	1.04364	1.07826	1.011	1.02884	1.04912	1.05386	1.02901	1.05014	1.05454	1.03658	1.0141	0.97612	1.06991	0.98868	1.08009	0.96593	1.1399	0.95787	1.04086	1.06386	1.01286	1.05624	1.18127	1.13849
	21.5	1.23618	1.25768	1.24587	1.15759	1.22541	1.20682	1.23982	1.18292	1.23901	1.21351	1.18821	1.23159	1.18122	1.16279	1.20202	1.17531	1.19731	1.1314	1.24474	1.20396	1.04714	1.00452	1.06356	1.01723	1.04104	1.07713	1.01404	1.03549	1.04849	1.04954	1.0292	1.05351	1.05141	1.03847	1.04366	0.99273	1.04306	0.95517	1.11441	0.97305	1.10464	0.94575	1.04417	1.04619	1.04705	1.08623	1.18279	1.1352
	22	1.22723	1.24397	1.22743	1.15033	1.2125	1.19894	1.24757	1.15894	1.23095	1.17573	1.19827	1.21441	1.18156	1.14853	1.20977	1.1543	1.16484	1.13889	1.22373	1.18769	1.04966	1.00708	1.07585	1.01162	1.0421	1.07345	1.0099	1.02719	1.05173	1.04663	1.025	1.05671	1.04116	1.03471	1.03804	0.98353	1.00449	0.97827	1.06509	0.9991	1.07984	0.97531	1.08881	1.02784	1.02908	1.10457	1.19169	1.16501
	22.5	1.21553	1.25515	1.23531	1.15743	1.21232	1.18505	1.23702	1.1614	1.23719	1.1832	1.17878	1.21021	1.1808	1.13276	1.19252	1.17541	1.1883	1.14359	1.22314	1.19122	1.04207	1.00264	1.07265	1.01423	1.0378	1.07769	1.01907	1.02893	1.06018	1.04634	1.03542	1.04714	1.04549	1.0308	0.99767	0.94881	1.06325	0.94401	1.08306	0.98555	1.09139	0.95845	1.1637	0.99159	1.02835	1.08373	1.22403	1.13465
	23	1.20785	1.24457	1.23418	1.14018	1.19871	1.19666	1.22727	1.16567	1.21935	1.1495	1.16756	1.20501	1.17863	1.14134	1.18628	1.17505	1.17036	1.132	1.24305	1.18602	1.0444	1.00978	1.08662	1.01414	1.03971	1.07329	1.00883	1.03189	1.05006	1.05174	1.01915	1.05083	1.05371	1.02763	1.02343	0.97729	0.97597	0.97127	1.0963	0.95563	1.1017	0.97034	1.10608	1.03937	1.0428	1.02517	1.19143	1.09278
	23.5	1.21781	1.22554	1.21431	1.1405	1.20682	1.187	1.22045	1.16263	1.20754	1.13836	1.17109	1.19883	1.17159	1.14861	1.19907	1.16825	1.15012	1.1321	1.21686	1.17294	1.04765	1.00097	1.06794	1.00351	1.03702	1.0742	1.00712	1.03261	1.03744	1.04608	1.02442	1.04516	1.03642	1.03223	1.01275	0.98658	0.97318	0.91566	1.02438	0.96963	1.09493	0.94747	1.09291	1.0053	1.05385	1.01772	1.19887	1.10697
	24	1.20756	1.22599	1.21796	1.13566	1.18945	1.18345	1.21833	1.16122	1.21544	1.15372	1.16391	1.20552	1.18335	1.12945	1.18456	1.14073	1.16531	1.13153	1.22337	1.17043	1.03985	1.00264	1.05922	1.03022	1.03715	1.07195	1.00424	1.02309	1.04088	1.0448	1.01748	1.04203	1.03392	1.02465	0.99539	0.96837	0.96794	0.92603	1.07043	1.00921	1.14789	0.94139	1.14171	1.00822	1.04279	1.09919	1.16869	1.13525
	24.5	1.20293	1.22128	1.21477	1.12693	1.19841	1.1755	1.20499	1.15347	1.21233	1.15642	1.16694	1.19542	1.16531	1.13488	1.17787	1.14962	1.16503	1.12966	1.21992	1.16229	1.05445	1.01218	1.08269	1.0091	1.0313	1.07244	1.0077	1.02399	1.04567	1.0455	1.0212	1.04258	1.04111	1.01977	1.0017	0.95132	1.03391	0.90174	1.04407	0.95434	1.10817	0.96031	0.98677	1.02189	1.07638	1.06902	1.24462	1.11758
	25	1.20418	1.2201	1.21441	1.13161	1.18808	1.17481	1.20232	1.15636	1.19457	1.14272	1.15514	1.18361	1.1619	1.15081	1.17986	1.14142	1.15355	1.13505	1.20956	1.1939	1.0334	1.00317	1.06165	1.01129	1.03395	1.07494	1.00769	1.02184	1.04349	1.04173	1.01579	1.04696	1.0394	1.02389	0.99412	0.96288	0.95412	0.93595	1.10965	0.98396	1.10141	0.93593	1.04507	0.95942	1.07099	1.06407	1.18344	1.10659
	25.5	1.19809	1.21894	1.21221	1.13554	1.18597	1.17751	1.22234	1.14485	1.20311	1.15167	1.14536	1.17852	1.15	1.14697	1.18699	1.15435	1.17886	1.12122	1.19024	1.18116	1.04059	1.00233	1.06348	1.00556	1.0376	1.06702	1.00563	1.02596	1.03733	1.03292	1.0015	1.03994	1.04645	1.03298	1.02705	0.96592	1.0294	0.95775	1.08784	0.97006	1.11272	0.93624	1.01601	1.05342	1.03628	1.06281	1.18524	1.1508
	26	1.19175	1.22013	1.22188	1.12837	1.18488	1.16819	1.19954	1.14645	1.19659	1.14146	1.16562	1.1817	1.14225	1.12776	1.18518	1.14626	1.14997	1.12016	1.20189	1.17521	1.02902	1.00621	1.08185	1.00839	1.02761	1.06075	1.0135	1.02864	1.04502	1.03528	1.01839	1.03538	1.03158	1.01496	0.98082	0.9282	1.0005	0.92231	0.98917	0.96331	1.08078	0.8996	1.04009	1.05625	1.05967	1.05468	1.20318	1.07956
	26.5	1.19978	1.21221	1.19516	1.12139	1.18037	1.16784	1.18872	1.13086	1.19873	1.11984	1.14521	1.17384	1.15019	1.11749	1.17001	1.11564	1.14878	1.12754	1.1866	1.17156	1.04294	1.00252	1.08487	1.01345	1.03577	1.05797	1.01684	1.01504	1.04073	1.0401	1.01429	1.03369	1.03406	1.01204	0.99743	0.97547	1.03414	0.93498	1.12368	0.98025	1.11348	0.97581	1.11504	0.95948	1.00299	1.09831	1.15065	1.11622
	27	1.1823	1.20646	1.19984	1.12714	1.19093	1.1563	1.20424	1.13709	1.19795	1.1424	1.15206	1.17064	1.14072	1.122	1.18148	1.12102	1.14426	1.09859	1.19715	1.14222	1.0389	1.00357	1.07311	1.00802	1.0229	1.05962	0.99987	1.01816	1.0323	1.03358	1.0097	1.0316	1.04392	1.01396	1.00143	0.98824	1.01787	0.93663	1.00954	0.97043	1.09246	0.92083	0.94541	0.96114	1.0209	1.03236	1.10711	1.12174
	27.5	1.17488	1.21055	1.19381	1.11823	1.18005	1.16032	1.19522	1.12914	1.19026	1.12761	1.15719	1.17618	1.13713	1.13292	1.18742	1.11215	1.14211	1.1157	1.19431	1.15637	1.03369	1.00655	1.06566	1.01333	1.02772	1.06184	1.00506	1.01848	1.03912	1.03042	1.00469	1.03312	1.04625	1.00265	0.99054	0.95162	0.97284	0.93504	1.0762	0.97165	1.10316	0.95904	1.01916	1.00442	1.00888	1.04748	1.17513	1.07316
	28	1.18378	1.20304	1.1944	1.11543	1.1861	1.1487	1.1975	1.1377	1.18048	1.13695	1.13886	1.16338	1.13591	1.14345	1.16692	1.12043	1.16394	1.10054	1.19664	1.13986	1.02986	1.00672	1.06697	1.00393	1.03505	1.05261	1.01238	1.02095	1.04417	1.02998	1.01637	1.0356	1.03501	1.01295	1.00008	0.94566	0.98067	0.92739	1.01937	0.96468	1.0896	0.964	1.06546	0.96929	1.0362	1.04847	1.19326	1.09532
	28.5	1.1772	1.19071	1.19084	1.10709	1.16857	1.14275	1.19441	1.13747	1.18027	1.12113	1.14781	1.17425	1.13019	1.10421	1.15202	1.11167	1.14087	1.11018	1.20634	1.144	1.03044	0.99289	1.06284	1.01692	1.03005	1.06296	1.00462	1.01422	1.03295	1.0182	1.01314	1.02455	1.03747	1.0173	0.99468	0.96017	0.97256	0.93581	1.04569	0.98491	1.11609	0.91291	1.00196	0.98169	1.01043	1.03875	1.08552	1.14652
	29	1.16739	1.19083	1.17862	1.11003	1.17198	1.16035	1.18889	1.12467	1.1861	1.1135	1.13582	1.15188	1.12108	1.12046	1.1534	1.09937	1.1314	1.11628	1.20007	1.14833	1.02962	1.00627	1.07423	1.00595	1.02911	1.06056	1.00464	1.02242	1.03416	1.02633	1.00494	1.02825	1.03444	1.00498	0.96342	0.94279	0.97469	0.91423	0.99066	0.96932	1.09283	0.94438	1.0452	1.02356	1.05532	1.05206	1.13654	1.06861
	29.5	1.17107	1.19197	1.18322	1.11307	1.17133	1.15638	1.18767	1.13649	1.17344	1.11827	1.129	1.16387	1.12151	1.11601	1.15315	1.12497	1.11518	1.11282	1.18431	1.16091	1.0287	0.99554	1.06076	1.02199	1.016	1.05059	1.01049	1.01876	1.03628	1.02585	1.00413	1.02471	1.03698	1.00335	0.97919	0.97308	0.93067	0.94328	1.06948	0.96359	1.10177	0.96637	1.05254	0.98975	0.97144	1.06873	1.17171	1.15012
	30	1.17209	1.18732	1.18824	1.09949	1.16405	1.13888	1.17123	1.13833	1.17953	1.11959	1.13071	1.15638	1.13387	1.10946	1.1566	1.10902	1.14132	1.10872	1.18173	1.13491	1.02969	1.00896	1.05676	1.01734	1.02369	1.05768	0.99202	1.01232	1.03238	1.02081	0.99988	1.02227	1.02846	1.00355	0.99579	0.96499	0.94518	0.90638	1.06009	0.97944	1.09796	0.92916	1.03207	1.03862	1.04628	1.02747	1.10995	1.07837
	30.5	1.16994	1.18305	1.16602	1.10243	1.1652	1.14455	1.17483	1.13046	1.17763	1.11265	1.133	1.15407	1.10178	1.10967	1.15245	1.11896	1.13272	1.10596	1.17686	1.13321	1.01128	1.01485	1.06722	1.01073	1.01628	1.04706	0.99807	1.01648	1.02554	1.03259	1.00025	1.02204	1.03172	1.01836	0.97596	0.97318	0.92721	0.93144	1.06496	0.95936	1.08647	0.91954	1.04378	1.02695	1.03041	1.07804	1.17506	1.09293
	31	1.15462	1.18139	1.16957	1.1081	1.16326	1.14471	1.17175	1.12678	1.18104	1.12499	1.13486	1.147	1.11302	1.10329	1.15485	1.11012	1.13229	1.10572	1.19589	1.14179	1.02655	1.00555	1.0592	1.00253	1.02286	1.04923	1.00378	1.01584	1.03472	1.03	1.00083	1.02298	1.03931	1.01972	0.995	0.90515	0.93985	0.89433	1.02904	0.96868	1.07554	0.93353	1.00826	1.04661	1.02482	1.046	1.1649	1.08901
	31.5	1.16242	1.18383	1.17724	1.09781	1.15533	1.15856	1.16663	1.13168	1.17059	1.12506	1.12721	1.14706	1.10297	1.10753	1.13903	1.11376	1.14284	1.09484	1.17873	1.12814	1.02544	1.00675	1.04966	1.00546	1.00461	1.05386	0.99222	1.01419	1.02503	1.01018	0.99598	1.01633	1.04146	1.00509	0.97995	0.96324	1.02087	0.91124	1.05527	0.97636	1.07863	0.94546	1.04035	1.00944	1.04047	1.04472	1.22792	1.06809
	32	1.15161	1.17554	1.17008	1.10047	1.15071	1.12924	1.171	1.11205	1.16861	1.11304	1.12185	1.14619	1.10663	1.0773	1.12857	1.09849	1.12284	1.10035	1.16709	1.13762	1.03115	0.9936	1.06696	0.9944	1.02163	1.05491	1.00384	1.01273	1.02429	1.01235	0.99389	1.02049	1.0321	1.01504	0.98396	0.96586	0.94327	0.89886	1.0375	0.97279	1.08975	0.95271	0.99422	0.97009	0.99132	1.0379	1.08167	1.14091
	32.5	1.15112	1.17058	1.15593	1.10391	1.14857	1.11903	1.15059	1.10999	1.16225	1.10296	1.11867	1.13674	1.11088	1.08241	1.14092	1.0853	1.11541	1.08699	1.17928	1.13267	1.01944	1.00053	1.06239	1.00317	1.01586	1.04681	0.98808	1.00849	1.02663	1.0058	0.99718	1.01857	1.03521	1.00624	0.99543	0.9685	0.88622	0.86565	1.05655	0.95309	1.08951	0.95067	1.0517	0.99086	1.04728	1.02538	1.12318	1.08219
	33	1.14237	1.16292	1.16088	1.0887	1.14795	1.13631	1.17289	1.11523	1.17274	1.12863	1.12608	1.14933	1.11251	1.08904	1.11686	1.08912	1.11247	1.0945	1.15846	1.14307	1.02384	0.99886	1.04643	0.99289	1.02427	1.03924	0.98859	1.00276	1.02579	1.01896	0.9971	1.01358	1.02784	0.98723	0.97268	0.94323	0.92295	0.91643	1.07073	0.97999	1.04233	0.96243	0.98898	1.0551	1.00839	1.0219	1.13828	1.05134
	33.5	1.14514	1.16419	1.15713	1.09845	1.14448	1.12725	1.15044	1.10277	1.16177	1.11882	1.13893	1.13359	1.10419	1.10163	1.13749	1.09476	1.12282	1.09986	1.17305	1.13693	1.02354	0.9897	1.065	1.00443	1.01621	1.04269	0.99467	1.00752	1.02	1.00887	1.00287	1.01354	1.02666	1.01969	0.98407	0.93734	0.95927	0.87552	1.0343	0.98008	1.0606	0.93328	0.97518	1.02284	1.07568	1.07374	1.0928	1.00855
	34	1.14427	1.14755	1.15129	1.09531	1.14247	1.11721	1.15638	1.10368	1.15461	1.10082	1.11984	1.12617	1.09122	1.08726	1.13126	1.08941	1.11893	1.08024	1.17522	1.12063	1.02541	1.00183	1.05039	0.99007	1.01877	1.04132	0.99192	1.01103	1.01536	1.01471	1.00035	1.01919	1.0298	0.99537	0.98524	0.93161	0.90515	0.91423	1.04187	0.99452	1.07352	0.9315	1.01844	1.01658	1.00921	1.01318	1.10104	1.05748
	34.5	1.13793	1.16416	1.15479	1.10078	1.15046	1.13041	1.15704	1.10503	1.1574	1.10995	1.12921	1.13741	1.09227	1.05869	1.13851	1.08074	1.11155	1.0738	1.15782	1.13928	1.01881	0.98997	1.04869	0.98753	1.00521	1.03417	0.99046	1.00593	1.02361	1.00779	0.99275	1.01048	1.02009	0.99679	0.96759	0.9375	0.97614	0.84894	1.05944	0.95139	1.03307	0.94006	1.01838	0.98	1.02039	1.04223	1.07965	1.11213
	35	1.13884	1.16778	1.14526	1.08628	1.13812	1.11565	1.1488	1.10546	1.1442	1.10565	1.12052	1.1286	1.08878	1.05673	1.1225	1.07092	1.12421	1.07195	1.1607	1.12224	1.02261	0.99078	1.04579	0.98503	1.00335	1.03056	0.99464	1.00415	1.01175	1.00359	0.99549	1.01695	1.0168	0.99138	0.97049	0.90192	0.88477	0.89896	1.0247	0.97189	1.06511	0.95952	1.03649	0.95656	1.02587	1.04472	1.12192	1.04848
	35.5	1.13676	1.15175	1.1439	1.10355	1.12985	1.11946	1.15351	1.08488	1.14744	1.10348	1.11205	1.13177	1.09249	1.06537	1.13273	1.08652	1.11054	1.10603	1.17494	1.13817	1.02073	0.98492	1.05266	0.9847	1.02848	1.03068	0.99442	1.00811	1.01454	1.01335	0.99701	1.01337	1.02265	0.99451	0.95875	0.8991	0.95282	0.85377	0.98301	0.95399	1.05027	0.93476	1.02972	0.95434	1.0434	1.05186	1.08127	1.08183
	36	1.14048	1.15983	1.15086	1.09771	1.13917	1.10498	1.14749	1.11267	1.13997	1.1109	1.11101	1.13556	1.09845	1.06334	1.1306	1.07572	1.11394	1.07589	1.1662	1.12188	1.02095	0.98569	1.05543	0.99739	0.99763	1.03805	0.98288	1.00546	1.01946	1.00642	0.99983	1.00979	1.02126	1.00835	0.99283	0.932	0.93085	0.86502	0.99595	0.98924	1.03129	0.93941	1.0284	1.04653	1.03248	1.03277	1.10502	1.14688
	36.5	1.13203	1.1589	1.13928	1.09609	1.13033	1.11434	1.14048	1.09218	1.15672	1.09521	1.11444	1.12494	1.08473	1.06793	1.11549	1.05759	1.13126	1.08805	1.17455	1.12924	1.02863	0.99556	1.05293	0.99676	1.0049	1.03504	0.99319	1.00213	1.01687	0.99558	0.98406	1.01072	1.02086	0.99163	0.9842	0.95393	0.89692	0.88144	1.05333	0.98471	1.08394	0.94231	0.99604	0.99579	0.98973	1.01084	1.10138	1.1316
	37	1.12556	1.15032	1.13717	1.08542	1.12346	1.1029	1.1332	1.09295	1.13798	1.08991	1.10053	1.12582	1.07494	1.05598	1.12214	1.07084	1.09604	1.09037	1.17694	1.13776	1.02923	1.00213	1.0476	0.99584	1.00607	1.03641	0.99383	1.00088	1.02603	1.01094	0.99238	1.01184	1.02053	0.98999	0.9759	0.8983	0.87	0.88826	1.01362	0.99123	1.03875	0.91552	0.98438	1.00667	1.02575	0.97387	1.09943	1.03681
	37.5	1.12541	1.16091	1.12747	1.08564	1.11601	1.09584	1.15376	1.09014	1.13711	1.09456	1.11369	1.12124	1.08423	1.05525	1.12653	1.0664	1.11374	1.06863	1.16497	1.12107	1.02464	0.98958	1.05884	0.9755	1.0024	1.03731	0.99585	1.00096	1.02377	1.01833	0.99724	1.00917	1.03051	0.98974	0.98764	0.93874	0.92299	0.87325	1.03232	0.98079	1.08677	0.93357	1.03802	0.93669	1.04391	1.04049	1.13342	1.06467
	38	1.1315	1.14344	1.13187	1.08075	1.12609	1.08341	1.13247	1.09769	1.13381	1.08097	1.09401	1.12038	1.07482	1.05748	1.11683	1.07821	1.0928	1.07701	1.14734	1.1272	1.01565	0.9997	1.0519	0.97791	1.00174	1.03033	0.9864	1.00432	1.01285	1.00071	0.98925	1.00384	1.02298	1.00908	0.96528	0.90705	0.94651	0.90341	1.01875	0.98179	1.04631	0.9515	0.94825	0.98902	0.99368	1.01672	1.1219	1.19204
	38.5	1.11825	1.13655	1.12722	1.08395	1.11874	1.09226	1.12271	1.08564	1.12942	1.06759	1.09556	1.11787	1.0697	1.03625	1.10938	1.06746	1.11026	1.07711	1.15467	1.11784	1.02141	0.99854	1.03638	0.98881	1.00086	1.02714	0.98444	0.99944	1.01019	1.01136	0.99336	1.00373	1.02029	0.99562	0.97019	0.9269	0.95956	0.89233	0.99029	0.9643	1.07786	0.9072	1.00569	0.95447	1.03858	1.03444	1.05352	1.10351
	39	1.1088	1.13427	1.12087	1.07114	1.12389	1.09449	1.13536	1.0768	1.12068	1.07107	1.08967	1.11359	1.07583	1.03795	1.11182	1.06596	1.05733	1.07508	1.15035	1.10154	1.02711	0.9946	1.04247	0.9802	0.99961	1.02463	0.98892	0.99948	1.01328	1.00426	0.98089	1.00086	1.02042	0.99822	0.95306	0.93875	0.91196	0.8633	1.02019	0.97962	1.05868	0.90381	1.03754	1.00847	1.0699	1.04085	1.04488	1.0831
	39.5	1.1263	1.13833	1.11576	1.07323	1.1184	1.08862	1.12266	1.06804	1.12523	1.06098	1.09558	1.11184	1.0703	1.06797	1.09903	1.0591	1.10632	1.08114	1.12246	1.10793	1.01682	0.98451	1.04343	0.9895	0.98702	1.03356	0.99428	0.99909	1.0129	0.99481	0.98897	0.99746	1.0167	0.98323	0.95141	0.91013	0.92775	0.92467	0.96004	0.95775	1.06123	0.92408	1.07303	1.05184	1.03824	0.97914	1.06722	1.05614
	40	1.11541	1.13752	1.13451	1.06817	1.12206	1.09684	1.11443	1.09485	1.12332	1.0657	1.08944	1.10176	1.06665	1.05054	1.0836	1.06778	1.09473	1.08003	1.16972	1.11888	1.01034	0.99317	1.0438	0.98023	0.99695	1.02794	0.98024	1.00734	1.00705	1.00243	0.98442	0.99621	1.02201	1.00825	0.97298	0.89946	0.96634	0.89893	1.07402	0.96178	1.062	0.92995	0.98839	1.01914	1.00159	1.03948	1.14537	1.02745
	40.5	1.11085	1.12797	1.12151	1.06654	1.10769	1.08564	1.11953	1.07947	1.11541	1.0605	1.0828	1.09671	1.06492	1.0275	1.10535	1.06457	1.09254	1.07062	1.12901	1.09393	1.01331	0.99038	1.04416	0.9787	0.99856	1.02469	0.98651	0.99456	1.00223	1.00098	0.98118	0.98989	1.023	1.00595	0.96777	0.92433	0.90404	0.87007	0.98272	0.96705	1.04201	0.89167	1.01022	1.01523	0.99872	1.0377	1.08695	1.01748
	41	1.10139	1.1383	1.12033	1.06965	1.10596	1.08736	1.12945	1.0916	1.11007	1.05689	1.08614	1.10875	1.06506	1.05554	1.10611	1.06554	1.086	1.06173	1.15314	1.1007	1.01382	0.98543	1.03755	0.9646	0.98671	1.02504	0.98456	0.99034	1.00345	0.99924	0.98368	0.99614	1.01717	0.99439	0.9712	0.94914	0.90035	0.88781	1.00293	0.94276	1.04476	0.8929	0.9567	0.97631	1.03055	1.03271	1.0621	1.06008
	41.5	1.10349	1.13574	1.1126	1.06225	1.10787	1.10626	1.12369	1.08278	1.11715	1.06236	1.09867	1.10668	1.0657	1.04372	1.10006	1.04481	1.10228	1.05702	1.13491	1.10223	1.01364	0.99156	1.03847	0.97764	0.98965	1.01359	0.98619	0.9923	1.01724	1.00036	0.98041	0.99921	1.01626	0.99213	0.93766	0.91142	0.91604	0.82902	1.08866	0.97453	1.04532	0.92067	1.03086	0.98691	1.06839	1.0627	1.09121	1.02752
	42	1.10088	1.12616	1.11066	1.07087	1.11245	1.07715	1.11028	1.07362	1.10763	1.07265	1.07368	1.09728	1.04908	1.03716	1.09249	1.05213	1.07693	1.06241	1.145	1.11114	1.00972	0.98391	1.0268	0.97474	0.99695	1.02631	0.98996	0.99944	1.01857	1.01331	0.98509	0.99991	1.01334	0.99236	0.9658	0.88261	0.93145	0.84753	1.01114	0.9209	1.06434	0.88673	1.01645	1.016	1.02618	1.00594	1.09306	1.09608
	42.5	1.11227	1.12486	1.10755	1.06343	1.10973	1.08141	1.09542	1.07657	1.10923	1.06095	1.09431	1.08872	1.05677	1.04167	1.09876	1.04862	1.07948	1.06172	1.13137	1.09112	1.01967	0.98218	1.03466	0.9747	0.99905	1.02684	0.98439	0.99973	1.00619	1.00153	0.97685	0.9938	1.01084	0.9952	0.97447	0.91951	0.92864	0.84732	1.00904	0.99599	1.06913	0.90959	1.00518	1.04465	1.03298	1.04429	1.02422	1.11305
	43	1.09446	1.11359	1.1069	1.06114	1.09444	1.08092	1.10794	1.08445	1.11449	1.07075	1.08537	1.09926	1.05616	1.02951	1.0935	1.04233	1.06131	1.08474	1.14879	1.10247	1.01117	0.98661	1.06093	0.96768	0.9934	1.02083	0.97917	1.00899	1.00691	0.99484	0.96919	0.99831	1.01428	0.97854	0.96647	0.90319	0.88732	0.89699	0.97417	0.96511	1.03374	0.91735	0.963	0.97669	1.00238	0.98377	1.15353	1.08879
	43.5	1.09386	1.13055	1.11017	1.05819	1.09282	1.08118	1.11987	1.08622	1.11105	1.05975	1.07908	1.0868	1.05158	1.05008	1.08496	1.04936	1.06315	1.05154	1.13428	1.09749	1.01422	0.98769	1.03228	0.95639	1.00409	1.02366	0.97517	1.00463	1.00469	1.00034	0.98296	0.99479	1.01545	0.98466	0.96072	0.91052	0.88875	0.88473	0.99328	0.97813	1.03867	0.91874	1.04819	0.97867	1.04037	0.98269	1.05651	1.07512
	44	1.08687	1.12689	1.0996	1.05065	1.09777	1.07959	1.10867	1.07299	1.10329	1.06461	1.06478	1.09555	1.02839	1.01803	1.08452	1.02877	1.08246	1.06036	1.13278	1.10456	0.99994	0.97943	1.04332	0.96257	0.98721	1.01941	0.98253	0.9968	1.01206	0.98963	0.97248	0.9908	1.01293	1.00376	0.96593	0.93413	0.89679	0.87533	0.94214	0.96533	1.01793	0.90131	0.96727	0.97424	1.02768	1.0277	1.09535	1.03559
	44.5	1.08713	1.11529	1.09323	1.05319	1.10359	1.08356	1.09273	1.07103	1.11316	1.05201	1.07738	1.09071	1.038	1.03214	1.07548	1.0288	1.06975	1.07645	1.12859	1.11985	1.00413	0.99087	1.03406	0.97204	0.98376	1.0172	0.97998	0.99767	0.99581	0.99435	0.96975	0.99086	1.01349	0.99435	0.96177	0.87868	0.82889	0.83561	0.92389	0.94848	1.02349	0.9167	1.01922	0.97051	1.06568	1.02624	1.13891	1.09379
	45	1.09572	1.11646	1.09279	1.05664	1.09395	1.0667	1.09636	1.06804	1.10027	1.05609	1.09219	1.08905	1.04253	1.01617	1.07318	1.0273	1.07358	1.08873	1.11956	1.11852	1.01846	0.99022	1.05087	0.97093	0.98879	1.00739	0.97629	1.00077	1.01241	0.99872	0.97323	0.98749	1.01327	0.98767	0.952	0.89575	0.87098	0.82709	1.00803	0.97375	1.03745	0.91596	0.99416	0.9688	1.06229	1.01403	1.1057	1.06529
	45.5	1.0809	1.11715	1.10286	1.04917	1.08317	1.07427	1.09914	1.05817	1.09017	1.05102	1.06465	1.08173	1.02703	1.01121	1.07632	1.0198	1.08385	1.0846	1.12378	1.08826	1.00376	0.98516	1.0251	0.9656	0.98554	1.0144	0.97071	0.99855	1.00116	1.00047	0.97778	0.99523	1.00375	0.95448	0.93908	0.89433	0.88271	0.83559	0.99173	0.98567	1.01878	0.90561	1.03701	1.04221	1.02565	1.02805	1.17509	1.03756
	46	1.09096	1.11747	1.09331	1.0478	1.09118	1.078	1.09201	1.05768	1.09655	1.04481	1.06672	1.07488	1.02076	1.02556	1.07495	1.0137	1.03814	1.0718	1.13201	1.10028	1.01229	0.98841	1.03883	0.95569	0.98119	1.01867	0.97709	0.9917	1.00798	0.99507	0.97327	0.98862	1.02059	0.9787	0.94194	0.87541	0.87894	0.84697	1.02149	0.98262	1.03184	0.87774	0.89237	1.0276	1.03152	1.01057	1.04407	1.15152
	46.5	1.08254	1.11768	1.1061	1.04719	1.08025	1.0702	1.10265	1.04849	1.09601	1.06542	1.0587	1.06962	1.02032	0.99345	1.0781	1.01945	1.08801	1.06956	1.1218	1.08667	1.0097	0.99626	1.04322	0.95697	0.98271	1.023	0.98103	0.99762	1.00378	0.995	0.97653	0.98287	1.0143	0.99076	0.94951	0.89457	0.90844	0.86345	0.99255	0.96072	1.0195	0.8759	1.00624	0.94052	1.02512	1.02561	1.13025	1.01009
	47	1.08647	1.11393	1.08979	1.05113	1.08472	1.06329	1.09797	1.06211	1.08363	1.07489	1.07617	1.08042	1.01832	0.99317	1.07837	1.01066	1.0543	1.07352	1.12167	1.07844	1.01604	0.98647	1.01463	0.96445	0.97758	1.01637	0.9829	0.99892	0.99591	1.00176	0.96595	0.98992	1.00387	0.99464	0.97991	0.88408	0.86251	0.86209	0.95169	0.9549	1.01147	0.85024	1.0759	1.03047	0.99726	0.98867	1.13756	1.02885
	47.5	1.07662	1.09831	1.0975	1.04669	1.08394	1.05136	1.08643	1.05483	1.08813	1.04782	1.05848	1.06571	1.01112	1.00446	1.07372	1.00233	1.0653	1.04673	1.13102	1.06836	1.00777	0.9934	1.0196	0.9631	0.9628	1.01114	0.97134	0.99429	0.99664	0.99313	0.98009	0.98117	1.01927	0.9878	0.99973	0.90958	0.91417	0.87309	1.00133	0.99273	1.03632	0.91216	0.94919	1.01783	1.00838	1.02245	1.19693	1.10689
	48	1.08057	1.11924	1.08692	1.04999	1.08079	1.06046	1.08628	1.0458	1.07566	1.05048	1.05459	1.07592	1.01548	1.02975	1.07114	1.01852	1.083	1.04628	1.10584	1.07853	1.01348	0.99133	1.03376	0.96543	0.98152	1.00189	0.98633	0.99536	0.99449	0.99338	0.96423	0.98369	1.00443	0.98151	0.95143	0.89497	0.85236	0.84242	0.94045	0.97739	1.03594	0.88083	1.01787	1.07654	1.01475	1.0162	1.08133	1.00098
	48.5	1.07656	1.10043	1.09125	1.04233	1.07981	1.05836	1.0817	1.05286	1.08868	1.04696	1.05017	1.06871	1.01611	1.00891	1.07864	1.01407	1.05871	1.07792	1.1151	1.07665	1.00674	0.98052	1.02551	0.96117	0.97558	1.00894	0.97006	0.99403	0.99945	0.98897	0.95978	0.98512	0.99984	0.99705	0.97192	0.88691	0.90632	0.8192	1.00714	0.95299	1.01835	0.92152	0.98912	1.03865	1.01955	1.02568	1.0687	1.06139
	49	1.07051	1.11068	1.08325	1.04255	1.0726	1.04464	1.07018	1.03717	1.07577	1.0651	1.04965	1.05755	1.01508	0.99149	1.05096	1.00196	1.06137	1.05127	1.12021	1.08474	1.00285	0.98647	1.02378	0.96762	0.96528	1.00278	0.974	0.98548	0.98542	0.99953	0.96795	0.97309	1.00438	0.99506	0.97958	0.88741	0.88399	0.8403	1.02328	0.95959	1.04249	0.91326	1.07704	1.01183	1.0094	1.05055	1.12828	1.03039
	49.5	1.06451	1.12123	1.08566	1.04161	1.07306	1.0577	1.0787	1.03416	1.07852	1.05291	1.05273	1.0614	1.01615	0.99262	1.06951	1.01442	1.06356	1.08699	1.12024	1.08498	1.0156	0.98254	1.03366	0.96516	0.97427	1.00815	0.97454	0.99115	1.01318	0.98821	0.96965	0.9797	1.00425	0.99514	0.96854	0.87455	0.86767	0.8153	0.97597	0.95819	1.07115	0.89914	1.08726	1.04668	0.99251	1.00881	1.14161	0.99208
	50	1.07112	1.11029	1.0781	1.04737	1.07696	1.04581	1.07673	1.04162	1.07836	1.03486	1.0365	1.0694	1.00557	1.00474	1.07592	1.0143	1.06744	1.07728	1.10857	1.08567	0.9996	0.98626	1.01555	0.96768	0.96988	1.00631	0.97078	0.99106	0.98686	0.9848	0.95548	0.97447	1.00267	0.99331	0.95881	0.86952	0.84908	0.83156	1.00256	0.94706	1.03707	0.89097	1.04112	1.0201	0.97287	1.01539	1.13792	1.09818
	50.5	1.06888	1.10534	1.08774	1.05248	1.07782	1.04192	1.07156	1.04068	1.08012	1.02972	1.04941	1.06098	1.00134	1.01342	1.07598	1.00382	1.05764	1.06383	1.10513	1.06605	1.00761	0.99134	1.02184	0.95352	0.97234	1.00638	0.96728	0.99	0.9891	0.98814	0.95697	0.97296	1.01148	0.98932	0.94805	0.87456	0.94443	0.78986	1.03368	0.93152	1.03594	0.88597	0.9947	1.02257	0.99689	0.96878	1.08844	1.04576
	51	1.06401	1.10695	1.0711	1.04656	1.06144	1.04022	1.06559	1.03966	1.0811	1.02118	1.05018	1.06648	0.97834	0.99477	1.06147	1.00267	1.06914	1.06942	1.10684	1.07199	1.00136	0.99211	1.00855	0.95547	0.97309	1.00009	0.96161	0.9906	0.98893	0.98422	0.95604	0.98652	1.01052	0.97135	0.93509	0.88612	0.87085	0.80064	0.97462	0.9729	1.02281	0.8717	0.99204	0.93018	0.98321	1.03897	1.10239	1.03902
	51.5	1.05997	1.09684	1.06913	1.03986	1.06398	1.0642	1.05792	1.03319	1.0698	1.06285	1.06069	1.06137	1.0011	0.98208	1.06028	1.00902	1.06226	1.06719	1.10325	1.06656	0.99853	0.98763	0.99823	0.95261	0.96427	0.99518	0.96443	0.99181	0.99538	0.99276	0.95767	0.98781	1.00263	0.97044	0.96366	0.86229	0.9306	0.85964	0.98923	0.97069	1.00333	0.88448	0.97729	0.99462	0.94979	1.00587	1.05129	1.04189
	52	1.06278	1.10211	1.06207	1.03919	1.05302	1.03276	1.0708	1.02616	1.07758	1.05015	1.03322	1.04577	0.98614	0.9893	1.06325	0.98505	1.05486	1.057	1.10918	1.06203	1.00852	0.99432	1.0213	0.94712	0.96405	1.00502	0.96639	0.99039	0.9913	0.97927	0.95952	0.97394	0.99232	0.97128	0.98513	0.86333	0.89237	0.81081	1.07225	0.93387	1.0064	0.89752	1.0043	1.03689	1.00945	1.03247	1.07088	1.05851
	52.5	1.05863	1.08582	1.06315	1.03742	1.058	1.02831	1.06325	1.03433	1.06858	1.04301	1.04016	1.04925	0.99094	0.96647	1.0607	0.9963	1.07429	1.07033	1.10272	1.07735	1.00338	0.98406	1.01433	0.94546	0.97248	1.00128	0.97189	0.9976	0.98828	0.99457	0.95399	0.98124	0.99685	0.97872	0.94374	0.8723	0.8975	0.84817	1.02721	0.96305	0.99274	0.84483	0.99067	1.03173	1.03594	1.05322	1.09237	1.06384
	53	1.06344	1.1007	1.07547	1.04527	1.07253	1.03683	1.05208	1.02937	1.06919	1.05136	1.04092	1.05374	0.99003	0.97507	1.06049	1.00506	1.04684	1.08025	1.104	1.07091	1.00567	0.98035	1.01651	0.95691	0.95981	0.99118	0.96443	0.98336	0.98364	0.98394	0.95788	0.9704	0.9988	0.9831	0.93626	0.88984	0.90061	0.82973	1.01396	0.92025	1.01845	0.91324	0.99133	1.0339	0.9923	1.02067	1.11218	1.04667
	53.5	1.05686	1.10663	1.06464	1.04475	1.05247	1.04163	1.06027	1.02385	1.0743	1.03965	1.02743	1.05284	0.993	0.96843	1.05431	1.00181	1.08779	1.06097	1.1023	1.03832	0.99279	0.97921	1.01965	0.95121	0.95286	0.99822	0.96671	0.98884	0.98425	0.98305	0.95134	0.97376	1.00844	0.96744	0.95427	0.87395	0.91465	0.81362	0.96995	0.94093	1.04793	0.82886	0.98732	0.94716	1.02035	0.95668	1.09118	0.99613
	54	1.06148	1.10244	1.0686	1.03593	1.0553	1.03665	1.0656	1.0336	1.06186	1.02762	1.04449	1.04784	0.98721	0.98934	1.05798	0.99956	1.04015	1.05343	1.09993	1.0574	0.99836	0.97986	1.01237	0.95101	0.9646	0.99924	0.96385	0.98961	0.98902	0.97905	0.95137	0.98178	1.00375	0.9652	0.94507	0.86185	0.82554	0.8238	1.01103	0.94445	1.02663	0.8531	0.94468	1.08513	0.95808	1.00066	1.09411	1.0511
	54.5	1.05068	1.09925	1.08122	1.0245	1.05941	1.02353	1.03839	1.02409	1.05847	1.03734	1.02082	1.03903	0.99661	0.96829	1.05859	0.98622	1.02693	1.06827	1.08524	1.06852	0.99281	0.97916	1.02327	0.9585	0.96384	0.99597	0.97259	0.98687	0.98558	1.0006	0.95779	0.96849	1.00463	0.98079	0.94088	0.88354	0.82491	0.7795	0.97811	0.94212	1.02446	0.84828	1.02781	0.99297	1.01429	1.01959	1.05547	1.04716
	55	1.05859	1.09362	1.05895	1.02846	1.05369	1.03961	1.04194	1.02247	1.0641	1.02127	1.03824	1.04701	0.99252	0.98117	1.05259	0.98264	1.0504	1.04973	1.10662	1.0638	0.99455	0.98401	1.00762	0.95819	0.96546	0.99591	0.96542	0.97625	0.99769	0.97933	0.94667	0.96292	0.9938	0.95007	0.97351	0.82068	0.8231	0.86789	1.01615	0.93385	0.98346	0.8865	0.97026	1.02203	1.02989	0.99517	1.0701	1.08536
	55.5	1.05161	1.08205	1.06143	1.02783	1.04644	1.02961	1.05096	1.01944	1.06089	1.0169	1.02987	1.04226	0.98919	0.9766	1.05534	0.9753	1.04717	1.04934	1.08037	1.04419	0.99799	0.98679	1.02192	0.96046	0.96007	1.00283	0.96977	0.9864	0.99321	0.98617	0.95735	0.9731	1.00846	0.96601	0.94853	0.86891	0.87487	0.81444	1.00247	0.95408	1.01225	0.8652	1.03174	1.00526	1.02562	0.9849	1.10413	1.00866
	56	1.05808	1.08686	1.06089	1.01893	1.05385	1.03902	1.04004	1.03869	1.05628	1.02349	1.02449	1.04761	0.99262	0.96208	1.05491	0.99557	1.02873	1.06359	1.07909	1.06827	0.98858	0.98653	1.02626	0.9549	0.96386	0.98487	0.96765	0.97928	0.99072	0.99112	0.95178	0.96839	1.01308	0.97551	0.94979	0.84164	0.82365	0.80145	0.98632	0.94587	0.97569	0.86193	1.043	1.02714	1.02554	1.01168	1.12305	1.02236
	56.5	1.05083	1.08781	1.0618	1.02553	1.05261	1.02777	1.05725	1.0371	1.05307	1.04554	1.03637	1.05296	0.99746	0.98319	1.04732	0.99599	1.0372	1.0356	1.09025	1.04351	1.0028	0.98569	1.02422	0.95372	0.96813	0.99322	0.97222	0.97943	0.98975	0.98107	0.95555	0.9606	0.99903	0.9552	0.95476	0.86535	0.82145	0.81062	1.00498	0.91631	0.97962	0.86506	0.96434	0.97358	0.99499	1.01426	1.02943	1.01631
	57	1.04905	1.07746	1.05007	1.01582	1.04671	1.03263	1.05592	1.02065	1.05965	1.02901	1.03852	1.03535	0.99508	0.97821	1.05257	0.97928	1.04434	1.04532	1.1037	1.04686	0.99595	1.00092	0.9998	0.94371	0.95995	0.99885	0.96776	0.98596	0.99186	0.98776	0.95679	0.95938	0.99394	0.96967	0.94268	0.85176	0.87796	0.80411	1.04945	0.93832	0.99669	0.89807	1.00399	0.98038	0.97653	0.96291	1.04633	1.11378
	57.5	1.05313	1.0733	1.05125	1.0175	1.04424	1.01398	1.04701	1.04013	1.05081	1.03259	1.02716	1.04692	0.99954	0.96331	1.03356	0.98575	1.03461	1.04533	1.07078	1.05201	0.98999	0.98759	1.0165	0.96632	0.96327	1.00035	0.96564	0.98277	0.98092	0.98092	0.94712	0.96244	1.00316	0.9568	0.94903	0.84546	0.88521	0.8081	0.98735	0.92947	0.98742	0.89638	0.98536	1.01991	1.0311	1.01584	1.14487	1.04256
	58	1.04739	1.0808	1.04786	1.01358	1.04182	1.02484	1.03434	1.03012	1.05223	1.02915	1.01817	1.03624	0.98544	0.97146	1.02573	0.97979	1.0178	1.03933	1.05962	1.03411	0.9797	0.98239	1.00742	0.95418	0.95271	0.99596	0.97089	0.98123	0.98494	0.9763	0.94457	0.96248	0.99313	0.96436	0.947	0.84678	0.82256	0.79034	1.01352	0.92786	1.00141	0.86566	0.99078	0.98155	0.99804	0.97355	1.06626	0.99602
	58.5	1.0596	1.08377	1.04221	1.01307	1.039	1.02172	1.04218	1.01739	1.04794	1.02732	1.02067	1.04477	1.00326	0.97501	1.05308	0.97572	1.04056	1.0412	1.063	1.03637	0.99472	0.98161	1.00584	0.9483	0.9528	0.99322	0.96928	0.98133	0.98308	0.98101	0.95857	0.96104	0.99765	0.94536	0.95148	0.86906	0.86083	0.76434	1.01868	0.91172	0.98236	0.86265	1.07565	1.05368	1.02002	1.03837	1.04659	1.02292
	59	1.03973	1.07149	1.04904	1.01384	1.04119	1.03201	1.04208	1.03542	1.06275	1.01331	1.0236	1.04645	1.0102	0.98394	1.03896	0.98858	1.02651	1.04375	1.06587	1.03681	0.98797	0.9861	1.00839	0.94096	0.96842	0.99508	0.96336	0.97909	0.99402	0.97825	0.95309	0.96672	1.00469	0.97879	0.95784	0.87468	0.83725	0.7862	1.0071	0.93643	1.001	0.8545	0.98956	1.06801	1.02412	1.00427	1.07399	1.04022
	59.5	1.05857	1.07235	1.04625	1.01124	1.04752	1.03581	1.05145	1.02661	1.05962	1.05141	1.02681	1.03175	1.00388	1.00484	1.03489	0.97064	1.03612	1.03622	1.05625	1.03506	0.99427	0.99415	1.00004	0.9474	0.94571	0.98516	0.96609	0.97806	0.98455	0.97526	0.95653	0.94414	1.00297	0.95748	0.93815	0.83999	0.8034	0.7672	1.00028	0.93356	0.99188	0.8918	1.00281	0.97519	1.04639	0.98129	1.09419	0.98618
Results from paired t-test
(relative F peak) before vs after AM251
p_two_tail	1.032e-09
[truncated: 9 more columns]

## Sheet: 7E
Data related to Figure 7E: DF400APs before the AM251 application and ratio of DF400APs after the AM251 application relative to that before
	DF400APs(before) (A.U)	SEM	DF400APs(AM251)/DF400APs(before)	SEM
Exp #1	89.93	6.50754	0.53884	0.07823
	38.2674	3.95136	0.96614	0.02923
	51.5622	3.24152	0.65511	0.01799
#2	51.9175	4.02456	0.51883	0.07005
	45.4573	3.03753	0.76204	0.03286
	76.527	4.29383	0.40205	0.03374
#3	46.3456	4.88612	0.31915	0.01394
	28.149	3.50146	0.56184	0.02491
	91.3825	5.28213	0.41243	0.04044
#4	38.3423	4.41114	0.75596	0.03911
	107.504	9.68551	0.22517	0.02457
	63.1702	2.86542	0.38294	0.02011
#5	32.8425	0	0.44873	0
	22.0938	1.97114	0.72351	0.15783
	13.0392	2.3628	1.13878	0.09434
#6	54.1183	5.2086	0.86771	0.06893
	109.759	11.23	0.40409	0.04025
	55.3582	4.03418	0.47358	0.02672
#7	20.17	0.5675	0.93095	0.0327
	32.6472	2.52283	0.48102	0.0322
	79.9775	0	0.33444	0
#8	33.2005	0.80341	0.71479	0.02342
	48.3058	3.95702	0.52411	0.07518
	40.5386	2.72945	0.59143	0.04593

## Sheet: 7G
Data related to Figure 7G: synapto-pHluorin fluorescence changes upon 400 APs and the following NH4Cl application without or with AM251
rerative F	control
sec	bouton #1	#2	#3	#4	#5	#6	#7	#8	#9	#10	#11	#12	#13	#14	#15	#16	#17	#18	#19	#20	#21	#22	#23	#24	#25	#26	#27	#28	#29	#30	#31	#32	#33	#34	#35	#36	#37	#38	#39	#40	#41	#42	#43	#44	#45	#46	#47		N
-9.5	0.97801	1.019	0.98565	1.00427	0.96184	0.97793	0.96812	0.99403	0.97863	1.00866	0.96772	0.99923	0.98039	0.99536	0.97593	0.99992	0.97938	0.98739	0.97222	0.97923	1.01689	0.98816	0.9674	0.98744	0.98553	0.98818	0.99563	1.00412	1.01995	1.01738	0.97519	0.9946	0.99603	0.98867	0.99027	1.01206	0.99691	1.00572	0.99341	0.97634	0.98278	1.06883	0.96719	1.07152	1.12534	0.98439	0.98602		47
-9	0.97996	1.00936	0.98153	1.01174	0.97752	1.01558	0.99627	1.01303	0.97614	0.99427	0.98576	1.02368	1.03414	1.01133	0.99473	0.97362	0.97111	0.98375	0.97075	0.96048	0.932	1.00118	0.97775	0.98741	0.96973	0.98783	0.9897	1.00695	0.96907	0.96414	1.04022	0.96224	1.00386	0.9841	0.98635	0.98235	1.00527	0.97036	1.00119	1.00615	0.93613	1.06899	0.96782	0.9625	0.84018	1.09487	1.04026		47
-8.5	0.95569	1.00867	0.97596	0.99043	0.98748	0.98137	0.97893	1.00449	1.00979	0.99715	0.96079	1.02371	1.01235	1.0045	1.00716	0.97662	0.97871	0.98812	0.96998	0.99268	1.01149	0.97051	0.97891	0.99077	0.98187	0.99641	0.99577	1.00219	0.96503	0.98806	0.94494	0.9903	1.03402	0.9965	0.96621	0.99482	1.02082	0.98678	0.99446	1.01935	0.95949	0.93656	0.99542	0.92244	0.88015	1.03525	0.99231		47
-8	0.98691	1.01858	0.97823	0.99323	0.9769	0.99087	0.98235	0.97322	0.97299	0.98817	1.01046	1.01955	1.01235	1.0104	0.99891	0.99703	1.0013	1.0143	0.99561	0.99468	0.96959	0.99805	0.98737	0.99305	0.98203	0.98902	0.99041	0.99592	0.97868	1.03587	0.98754	0.97587	0.97299	1.01386	0.99596	0.99042	0.98729	0.9945	0.98195	1.01209	1.00134	0.98466	0.93451	0.95689	1.12199	0.97763	0.97374		47
-7.5	0.96276	1.00273	1.00006	0.98011	0.97337	0.99001	0.94992	0.99825	0.97804	0.99434	0.98428	1.03224	0.98735	1.00864	1.02425	0.99357	1.00997	0.97196	0.98804	0.98445	1.01156	1.02216	0.99635	0.98829	0.98744	0.98829	0.98623	1.00391	0.99202	1.02808	0.98071	0.94594	0.97392	0.98812	0.98931	0.98641	0.99793	0.98187	0.98604	1.00064	1.00775	1.03221	0.96279	1.03924	0.88584	1.1655	1.05069		47
-7	0.9688	0.96742	0.98813	0.98992	0.98917	1.00546	1.00709	0.98323	1.01081	1.02308	0.99369	1.01961	0.99999	0.99145	1.00397	1.00535	0.97832	1.00219	0.97105	0.97255	0.97139	1.0383	0.99797	0.99352	0.99236	0.99188	0.99566	1.00854	0.99814	0.97822	1.01547	0.98926	0.98261	0.96909	0.98425	0.9795	1.00335	1.03225	0.99197	1.02165	0.93151	0.95838	0.92307	1.01888	0.83675	0.97672	0.95712		47
-6.5	0.97716	1.00663	0.9842	1.00753	0.98888	1.02808	0.97059	0.99693	0.99829	0.99229	1.0001	1.04331	0.99412	1.00314	1.01654	0.97622	1.00543	1.00014	1.00088	1.01597	0.98852	1.02818	0.96918	0.98661	0.99755	0.98123	0.99257	1.01007	1.00943	0.9807	0.98078	0.9855	0.97145	1.00161	0.98582	0.98761	1.01379	0.94845	1.00194	1.01463	1.08112	1.01323	1.03391	0.99158	0.94538	1.06386	1.04647		47
-6	0.9923	1.00585	0.96644	1.05571	0.9816	0.97898	0.99905	0.9713	0.98501	0.99102	0.98581	1.0075	1.00121	1.01956	1.00705	1.00454	1.017	0.98014	1.00025	1.00881	0.99187	1.01657	0.97451	0.99429	0.98614	1.01652	0.99937	1.00503	1.01465	1.00288	1.00328	0.96342	0.98001	1.00421	1.01012	1.00112	0.99847	0.95642	0.9784	1.00398	0.97102	1.05285	0.92063	0.89684	1.13124	1.14303	0.98555		47
-5.5	0.98532	1.0026	0.99541	0.99372	0.99671	1.02657	0.99753	0.99092	0.99101	0.98771	1.00205	1.0301	1.01198	0.99935	0.99813	0.96684	1.00157	0.99149	0.99559	1.00832	0.9581	0.9841	0.99787	0.98947	0.97874	0.98117	0.99389	0.99659	0.9916	0.97963	1.01396	0.97187	0.97179	1.00055	1.00238	0.99102	0.97955	0.95405	1.00842	1.00247	1.02099	0.93017	0.90931	1.03315	0.91512	1.05828	1.02535		47
-5	0.9817	1.02478	0.98488	0.98592	0.97534	1.00158	0.98493	1.00615	0.96305	1.00946	0.9713	0.99353	0.98903	1.00604	1.03462	0.98991	0.9674	1.00787	0.99739	1.00735	0.99167	0.99844	1.02488	0.98221	0.99363	0.99184	0.98934	0.99729	1.00699	1.04121	0.98982	0.9753	1.01199	1.04246	0.97592	0.99918	1.01205	0.99737	1.00669	1.0196	0.98734	0.86042	0.93643	1.00758	0.81945	0.9592	1.05839		47
-4.5	0.97602	0.98743	0.98576	1.0365	0.9754	0.98879	0.95887	0.99451	0.9935	0.99008	0.97509	1.05694	1.02546	1.00656	1.01853	1.00593	0.99742	0.99797	0.98964	1.03196	0.98412	0.982	0.98906	0.98141	0.98262	0.99833	0.99189	0.99387	0.9718	0.98172	0.98233	0.98043	0.97192	1.00814	1.00366	0.99385	0.99353	1.00007	1.01349	1.02716	0.95464	0.93982	0.97983	1.17114	0.92912	0.93927	0.9625		47
-4	0.99671	1.01122	0.99499	1.05548	0.99614	1.00218	0.96661	0.98361	0.99379	0.99568	1.00127	1.01441	1.02858	1.01296	1.02578	0.9872	0.98961	0.99888	0.97874	0.98529	1.00445	1.04286	0.95541	0.99485	0.98575	0.99858	0.9927	1.01795	1.01226	0.99856	0.99912	0.97239	0.9876	0.98504	0.98317	0.9902	0.98162	1.00075	0.99693	1.02547	1.00133	1.05322	0.96198	1.06942	1.10099	0.98217	1.01571		47
-3.5	0.99111	1.02826	0.99877	1.02642	0.99733	1.01094	0.96192	1.00153	0.99577	0.98938	0.97166	1.01075	1.01115	1.01306	1.00273	0.99422	1.00073	1.00891	0.97148	0.98318	0.99221	0.95501	0.98282	0.99255	0.99452	0.99644	0.99007	1.00461	1.00445	1.00291	1.0119	0.98643	0.96012	1.01551	0.98915	0.98131	1.00497	0.97524	0.99876	1.01057	1.06361	0.95406	0.96524	1.00813	1.05121	1.00322	0.92097		47
-3	0.9915	1.01691	0.99964	1.00712	0.98383	1.0187	0.99064	1.02965	1.00423	1.00577	1.02068	1.03032	1.01152	1.01606	1.0398	1.01396	1.01995	0.95927	0.999	0.99874	1.01167	0.98457	1.01308	0.98878	0.98656	0.99491	0.98911	1.00734	0.97887	1.00979	0.97673	1.02729	1.00766	1.00898	0.96642	0.9897	1.00586	0.97899	0.99832	1.0119	0.98348	1.00072	1.00279	1.01155	1.15964	0.97189	1.04245		47
-2.5	1.00598	0.99614	1.01453	0.98558	1.01353	1.02044	0.95919	1.02545	0.99865	1.00343	1.00491	1.05291	0.98597	1.00879	1.02093	1.00275	1.02198	1.01262	0.99234	0.97312	0.9885	1.03074	1.00611	0.98991	0.99321	0.98799	0.99443	1.00758	1.0013	0.99112	0.98672	0.95782	0.95297	1.00817	0.9715	1.01018	0.99941	0.99571	0.98947	1.01684	0.92117	0.93117	0.92083	0.95554	0.95858	1.18323	0.98785		47
-2	0.99246	0.98561	0.99936	1.01118	0.99415	0.97547	1.00233	1.00465	0.9807	0.99307	0.98063	0.99658	0.98015	1.00265	1.019	1.00546	0.97316	1.00491	1.00655	1.01257	1.00714	0.98136	0.98185	1.00161	0.99311	1.00622	1.00138	0.98469	0.99715	0.95919	0.97868	0.99046	0.99502	0.99144	1.00148	0.99109	0.99285	1.00773	1.01051	0.9932	0.98333	0.9041	0.98985	1.0303	1.12042	0.94601	1.03779		47
-1.5	1.01572	1.01973	1.00016	0.99265	1.00471	0.99366	0.96098	0.98126	0.99039	0.99578	0.97777	0.99982	0.98733	0.99662	0.9808	0.99048	0.96294	1.0202	1.00728	0.99704	0.9626	1.00057	1.01134	0.98518	0.99667	0.9951	0.99544	0.99958	1.02102	0.9968	1.01234	1.00914	0.99252	1.01363	0.9892	1.0009	0.9791	0.98656	0.99028	0.99651	0.96572	1.07847	1.01	0.98646	1.07868	1.05632	1.00997		47
-1	0.99333	1.00464	0.98788	0.98425	1.00504	1.00669	1.00693	0.9886	1.00799	0.99038	0.99575	0.96579	1.01508	0.99686	0.98566	1.01203	1.03202	0.99372	0.99502	0.98508	1.00971	1.04756	1.00188	0.99806	1.00455	0.99233	0.9939	0.99954	0.986	1.03083	1.00608	0.98619	0.98536	1.00094	0.99081	1.0082	0.99794	0.97433	0.99055	0.99506	1.01504	1.07689	1.02326	0.88124	0.82875	0.9538	1.03623		47
-0.5	0.97577	0.96051	1.00116	0.99994	0.97146	1.022	1.03205	1.02436	1.01613	1.01586	1.06101	1.04654	1.00987	0.98544	1.00465	0.96414	1.03587	0.94457	0.96254	0.98805	1.01547	0.92541	0.98734	1.00573	0.98869	0.98991	0.99518	1.00762	0.97098	1.00221	0.9837	1.00404	1.02726	0.96766	1.01177	0.97813	1.03267	1.03495	0.99406	1.00588	1.04311	0.87144	0.93687	1.16209	0.92834	1.05744	0.82731		47
0	0.9369	0.98288	1.00558	0.97599	0.97747	0.99575	0.97113	0.94625	0.87846	0.99566	1.02239	1.01884	0.96386	0.9971	0.99305	0.95512	0.90436	0.99431	0.98839	1.03402	0.95849	1.00759	1.00572	0.99982	0.98159	0.99035	1.00624	0.99731	0.9658	1.02753	1.00911	0.9871	0.99121	1.00619	1.03108	1.01693	0.99923	0.9841	1.00845	1.01079	0.913	0.9523	0.97856	1.21133	1.14875	1.17069	1.02609		47
0.5	0.97114	1.00189	0.95544	0.99056	0.99788	0.98033	0.9698	0.99184	1.02646	0.99314	0.96754	1.00945	0.97169	1.01016	0.99943	0.99493	0.99849	0.95472	0.98644	0.97345	0.96012	1.07683	1.01429	0.99247	0.99492	1.00019	0.99084	1.0151	1.00872	0.97216	0.99096	1.02658	0.98332	1.01801	0.95758	0.99384	0.97495	0.97885	0.99422	1.02933	0.97501	0.77681	1.03981	1.12026	1.16875	0.98448	1.03394		47
1	0.96144	1.00954	0.98923	0.97968	0.97161	0.98839	1.016	0.99314	1.02655	1.00051	0.98517	1.1094	0.97679	1.01025	1.02862	1.01806	0.9467	0.95998	0.94858	0.9516	1.02173	0.99139	0.99204	0.97854	0.98068	0.98021	0.98306	1.0033	1.03357	1.04889	0.94502	0.88518	0.98747	1.02788	1.04897	1.00143	0.98267	0.9352	1.01471	1.01786	1.05938	1.28349	0.87723	1.2104	1.05467	1.18812	1.11326		47
1.5	1.01071	0.98894	0.93212	0.96599	1.00952	1.01104	0.93642	1.05649	1.07864	0.99586	0.99079	1.12968	0.95494	1.03914	0.97846	1.0128	0.96087	1.0225	0.97959	0.95313	0.97795	1.06439	1.04921	0.99222	0.99007	0.99772	1.00851	0.97324	1.00325	0.96223	0.94627	0.99015	1.04105	1.02741	0.93497	0.97747	0.97671	0.98662	1.0205	1.00858	0.94475	0.92497	1.01169	0.81995	0.95424	0.88735	1.18158		47
2	1.00865	1.01891	1.00747	1.07364	0.96558	1.02919	1.04122	0.92893	1.04286	1.00021	1.01056	1.04881	0.99556	0.9959	1.04945	1.02502	0.96013	0.99339	1.00233	0.93273	0.97133	1.07331	0.97598	0.97875	0.99654	0.97355	0.99543	0.98893	1.00215	1.00174	0.94005	0.9667	1.04034	1.01299	1.01639	0.98066	0.99278	0.97833	1.01864	1.02831	1.00994	1.15609	0.924	1.09082	1.247	1.0324	1.13746		47
2.5	1.03728	1.01602	0.97955	1.00055	1.00598	0.99632	0.98768	0.98988	0.95391	1.01429	1.01724	1.04525	0.99775	1.02401	0.99526	1.01495	1.02791	1.01255	0.98473	0.89831	0.98813	0.98151	0.98356	0.97918	0.99312	0.99647	0.98559	1.00985	1.05131	0.94029	0.99637	1.02379	0.98387	1.01263	0.99054	1.00329	1.03685	0.94333	0.98421	1.02118	0.97069	1.06826	1.15486	1.28427	0.93785	1.16481	0.96966		47
3	1.0287	0.99808	0.97115	1.00867	1.02263	0.98855	1.03362	0.97118	1.01273	1.06274	0.9975	1.11628	1.0392	1.0068	0.97027	0.9989	0.94579	0.98981	1.00288	0.94804	0.96467	1.0051	1.03086	0.97869	1.00026	1.01491	0.99398	1.00174	0.98311	0.97216	1.03055	1.00848	0.97669	1.04429	1.0404	0.97873	1.07015	0.9794	1.02595	1.0094	1.11832	1.02009	1.18117	1.06499	1.30196	1.14902	1.09738		47
3.5	0.98547	0.99468	0.97717	1.0162	0.98589	0.98534	1.02227	1.00145	1.028	1.00493	1.02513	1.05891	1.00596	0.99709	1.02166	0.94855	1.06733	1.04493	0.97152	1.0386	1.04944	0.98952	0.99695	0.99588	1.018	0.96982	0.99329	1.00857	0.99213	1.00431	0.99493	1.06189	1.02247	1.06928	0.95582	0.99128	1.04298	0.94113	0.99376	0.98428	0.96727	0.83795	0.95288	1.11638	1.27792	1.01976	1.14168		47
4	1.03568	1.01237	0.98525	1.06129	0.98635	0.95186	1.01897	0.96418	1.01326	0.99631	1.02795	1.0945	1.0315	1.03519	0.97295	0.99609	1.03371	0.998	0.95698	1.04733	0.94869	1.16187	1.02405	0.99527	0.96983	0.98568	0.9902	1.01082	0.98159	1.01477	1.03637	1.07114	1.00073	1.10743	0.98973	0.99915	1.02525	1.02996	0.99772	1.01919	1.0567	0.92635	0.98281	1.07985	1.09532	1.05788	1.07223		47
4.5	0.93574	1.06762	0.97393	0.98662	1.00856	1.00187	1.00877	0.93504	1.03834	1.01801	1.03994	1.08239	1.0533	1.0386	1.01864	0.98052	0.97286	1.03272	0.96073	1.01434	0.99784	1.03414	1.01478	0.99392	0.99757	0.97952	0.99076	1.01695	1.0234	1.03391	1.02558	1.03457	0.97634	1.04994	0.97418	1.02183	0.99664	0.97568	0.96061	1.00304	1.03896	0.98141	1.13454	1.07001	1.04286	1.13617	1.07217		47
5	0.97429	1.03533	0.98242	1.01928	0.99656	0.97774	0.97849	0.99753	1.05086	0.99649	1.01003	1.09919	1.05557	1.04533	0.96905	1.00343	1.02253	1.07419	0.97735	0.96595	0.98438	1.01448	0.97485	1.00192	0.98488	1.01113	0.98793	0.99559	1.02365	1.05702	1.09093	1.07315	1.00213	1.1367	1.02375	1.02412	1.06523	1.01831	1.00327	0.96379	0.90942	1.01093	0.88669	1.05034	1.14132	1.10928	0.94581		47
5.5	0.93962	1.02384	1.00557	1.0131	0.97615	1.01467	1.05435	1.02102	1.04189	1.02204	1.0154	1.08417	1.00508	1.04747	0.9829	1.01637	1.08272	1.05135	0.96992	1.03142	0.99057	0.96149	1.01311	1.00289	1.01018	1.00739	0.99049	1.00392	1.03277	0.95317	1.01226	1.11457	1.03208	1.03016	0.99806	1.01348	1.06739	0.9442	1.00457	1.00373	1.05727	1.19558	0.96381	0.98342	1.18624	1.11995	1.04208		47
6	0.99249	1.07146	0.98365	1.08823	1.05199	0.99329	1.08045	0.99414	1.10623	1.01912	1.10702	1.074	1.01128	1.0439	1.00428	1.00588	0.94595	0.93649	1.01791	1.08356	1.00166	1.00611	1.02073	0.99197	1.00448	0.98563	0.9966	1.01483	1.00105	1.05288	1.0212	1.03211	1.03754	1.08079	0.98623	1.04451	1.07518	1.04245	0.99327	1.01462	0.98508	1.16744	0.8853	1.15258	1.40895	1.01617	1.20025		47
6.5	1.01873	1.00208	1.01762	1.00988	1.0403	1.00632	1.05569	1.03422	1.1279	1.06079	1.0887	1.16185	1.02921	1.03825	0.99843	0.99587	1.00521	1.06295	1.00442	1.05237	1.05271	1.24252	1.07357	1.01104	0.9816	1.02548	1.00547	1.0105	1.06142	1.07243	1.04127	1.13633	1.10458	1.11228	1.08267	1.0406	1.13027	0.96925	0.97003	1.0472	0.92859	0.87663	0.88662	1.06666	1.21246	1.22046	1.17379		47
7	1.00944	1.09209	1.00587	1.16981	1.02098	1.0315	1.0253	1.0563	1.0443	1.02973	1.05764	1.08661	1.08055	1.06332	1.05255	0.99992	1.1304	1.03261	1.04341	1.06389	1.03966	1.29597	1.08984	1.00509	0.99905	1.00167	1.01194	0.99651	1.03212	1.08968	1.0922	1.15667	1.12682	1.13535	1.11115	1.10076	1.0947	1.05738	0.99296	1.01395	0.96574	0.9068	0.86811	1.13304	1.10439	1.09305	1.05653		47
7.5	0.95739	1.09775	1.00794	1.09166	1.03782	1.02402	1.01999	1.04449	1.12071	1.0374	1.08771	1.09871	1.05095	1.0337	1.02744	0.9723	1.01364	1.08674	1.02264	1.04891	1.00904	1.32552	1.04951	1.00213	0.98198	1.0333	1.00113	0.99601	1.03972	1.08665	1.1061	1.16141	1.03818	1.12462	1.08753	1.06133	1.08005	0.98874	1.00825	1.04183	1.09203	1.04774	0.98782	0.82664	1.10668	0.97425	1.1801		47
8	1.00403	1.04257	1.01733	1.03267	1.04314	1.07552	1.07901	0.98964	1.1213	1.06137	1.06045	1.12133	1.05646	1.06141	1.01788	0.98324	1.00241	1.07873	1.01487	1.06262	1.09611	1.20643	1.06802	1.01072	1.00749	1.02548	1.00478	1.01566	1.06292	1.03275	1.05865	1.16655	1.08355	1.08469	1.06298	1.07818	1.11225	1.07931	1.02677	1.00061	1.1702	0.80933	1.17553	1.24151	1.57636	1.08924	1.24687		47
8.5	0.95861	1.06724	1.00255	1.03147	1.03477	0.97342	1.05736	1.04744	1.13014	1.08496	1.03891	1.12657	1.07059	1.0624	1.00536	1.01891	1.11444	1.10573	0.93922	1.06137	0.95733	1.32149	1.07294	0.99493	0.99744	1.03454	1.00609	1.03813	1.06896	1.08272	1.08802	1.12966	1.09959	1.12536	1.05535	1.0622	1.10456	1.08262	0.98674	1.02042	1.03509	1.06048	1.06883	1.19407	1.5521	1.10808	1.29688		47
9	0.9746	1.04301	0.97509	1.03925	1.01948	1.04667	1.11076	1.04924	1.18221	1.1064	1.03685	1.10174	1.03176	1.04907	0.99158	1.0115	1.01949	1.05562	0.97238	1.03507	0.99168	1.26497	1.07397	1.00264	1.01207	0.99788	1.00036	1.03011	1.04231	0.99734	1.10914	1.13771	1.06471	1.16256	1.07467	1.0979	1.123	1.08146	1.0065	0.9898	0.97177	0.84274	1.05011	1.12414	1.34218	1.05505	1.32382		47
9.5	1.006	1.02925	1.01322	1.07572	1.04283	0.99858	0.96541	1.04889	1.13758	1.0633	1.11714	1.15116	1.06947	1.04569	1.054	1.03308	1.12687	1.0418	1.00933	1.00988	1.00292	1.37564	1.13301	1.01024	0.97241	1.02899	0.99962	1.02238	1.09484	1.11678	1.11441	1.18752	1.05884	1.14902	1.12277	1.17675	1.13882	1.0123	0.96684	0.97151	0.85765	1.0278	1.16829	0.94796	1.26841	1.04546	1.10684		47
10	0.99789	1.09721	0.98143	1.13012	1.02753	1.08246	1.02771	1.00485	1.07671	1.10638	1.05948	1.10834	1.08695	1.07295	0.97891	1.07114	1.04438	1.01712	0.99846	1.05369	1.05745	1.13375	1.09229	0.99592	0.99567	1.02372	1.00069	1.02805	1.08842	1.0775	1.13622	1.26841	1.12682	1.19956	1.12858	1.15271	1.10864	1.14251	0.99274	1.02351	1.07935	0.92586	0.92135	1.03829	1.62018	1.40646	1.03317		47
10.5	1.00004	1.10265	1.01547	1.04911	0.99584	1.08998	1.11825	1.00614	1.15119	1.09689	1.09541	1.14818	1.07123	1.08342	1.08259	1.08101	1.16208	1.10116	1.0397	1.07161	1.0257	1.32988	1.10114	1.01527	1.00414	1.01998	1.00776	1.02286	1.09384	1.02566	1.12777	1.18988	1.1184	1.21236	1.12981	1.16208	1.17837	1.07275	0.98132	1.00663	1.27755	0.89983	0.96784	1.36303	1.67438	1.54846	1.37115		47
11	1.01981	1.09424	1.04326	1.02674	1.0204	1.07462	1.10217	0.98161	1.13671	1.09767	1.11598	1.15425	1.06892	1.07076	1.09521	1.08313	1.05106	1.0455	1.00515	1.10247	1.07724	1.16531	1.0517	1.03824	1.02255	1.02273	1.01211	1.04822	1.10791	1.09105	1.21757	1.22187	1.11382	1.2595	1.16518	1.20492	1.13715	1.04678	1.00563	1.02697	1.14488	1.04361	1.15284	1.24633	1.65307	1.38141	1.18485		47
11.5	0.98018	1.1047	1.01974	1.06914	1.02812	1.05495	1.10535	1.06845	1.20269	1.11947	1.11539	1.20683	1.08208	1.08594	1.02188	1.03382	1.03583	1.09132	0.97039	1.11478	1.04786	1.23362	1.1449	1.01053	1.02168	1.03099	1.00907	1.03136	1.15212	1.12343	1.16135	1.28643	1.11872	1.3	1.15662	1.17127	1.21229	1.07181	1.0002	1.05001	1.07605	1.01523	1.05366	1.22418	1.68411	1.29342	1.1823		47
12	1.02881	1.10234	1.04559	1.15188	1.01481	0.96703	1.11554	1.0611	1.16578	1.10781	1.14116	1.17239	1.09074	1.07589	1.12314	1.03718	1.08786	1.13098	1.03279	1.12861	1.11762	1.52528	1.12277	1.00593	1.00108	1.02654	1.00169	1.04835	1.15664	1.12937	1.23611	1.30638	1.1083	1.25041	1.16055	1.17078	1.19105	1.1565	1.0084	1.06932	0.96289	0.91102	1.13579	1.27464	1.48271	1.21904	1.32185		47
12.5	0.99414	1.0841	1.02451	1.09372	1.00307	1.07612	1.05162	1.02454	1.17217	1.12825	1.14706	1.25708	1.09081	1.09681	1.14509	1.07516	1.03463	1.11794	0.95106	1.18997	1.06636	1.22607	1.08595	1.00649	0.99698	1.00313	1.01567	1.03609	1.16233	1.11279	1.19655	1.28491	1.12083	1.25379	1.1702	1.22778	1.24236	1.10093	1.00621	1.0495	0.99276	1.08618	0.91836	1.39722	1.88004	1.53615	1.22779		47
13	1.04202	1.11611	1.03166	1.06152	1.06204	1.09033	1.13274	1.05036	1.16267	1.15919	1.09807	1.16887	1.08638	1.08298	1.06352	1.07096	1.13377	1.13313	1.0159	1.09396	1.07142	1.214	1.09245	1.02289	1.01949	1.01663	1.00482	1.04519	1.13643	1.15513	1.26333	1.27516	1.1447	1.26267	1.18332	1.21557	1.24945	1.09198	1.00216	1.03818	1.14005	1.04515	1.27109	1.12013	1.8678	1.34765	1.24438		47
13.5	1.00347	1.13192	1.03134	1.11811	1.06612	1.07241	1.08501	1.08742	1.15875	1.15805	1.16907	1.13883	1.14627	1.0959	1.11455	1.01693	1.09135	1.15668	1.03243	1.12562	1.09739	1.25972	1.0745	1.01496	1.02673	1.01386	1.01356	1.03631	1.18761	1.11221	1.34053	1.32491	1.21899	1.27909	1.17895	1.26805	1.20333	1.15324	1.0182	1.06315	1.15507	0.94378	0.94703	1.28876	1.51014	1.00757	1.22315		47
14	1.03336	1.13095	1.03537	1.21975	1.05189	1.04946	1.15468	1.05953	1.25847	1.14873	1.12785	1.22546	1.03933	1.12348	1.11828	1.09423	1.04661	1.14426	1.03138	1.13315	1.06783	1.30091	1.10775	1.0143	1.00698	1.0494	1.02	1.05174	1.1698	1.11063	1.25537	1.31592	1.148	1.28935	1.20226	1.27764	1.24844	1.14658	0.99634	1.11123	1.06279	1.02715	1.13857	1.32663	1.68881	1.38958	1.24247		47
14.5	1.01976	1.13669	1.02335	1.15242	1.04396	1.07289	1.13496	1.09364	1.22814	1.21428	1.16123	1.22189	1.08634	1.12657	1.04753	1.05534	1.11218	1.1697	1.08212	1.20407	1.11281	1.3138	1.04462	1.00675	1.01361	1.03695	1.03398	1.03978	1.18579	1.12888	1.26226	1.37942	1.2702	1.29181	1.23167	1.29152	1.22823	1.13577	1.00064	1.04375	0.99396	1.3838	1.04496	1.38485	1.59363	1.34057	1.20549		47
15	1.06481	1.14757	1.06886	1.17987	1.06597	1.11638	1.15219	1.04947	1.22121	1.19955	1.17507	1.22308	1.14182	1.14245	1.10701	1.0876	1.06652	1.21538	0.98331	1.1574	1.11121	1.16508	1.09574	1.03577	1.02457	1.02509	1.01376	1.05999	1.20332	1.10854	1.24953	1.3302	1.26389	1.27988	1.2507	1.2891	1.30206	1.22959	1.00341	1.09314	0.95812	1.03939	1.17066	1.18878	1.58707	1.74349	1.07657		47
15.5	1.02291	1.15772	1.08946	1.17324	1.05544	1.1505	1.1323	1.05818	1.25927	1.2437	1.19141	1.24654	1.16219	1.15142	1.08511	1.10833	1.08283	1.15345	1.0742	1.12459	1.15522	1.16885	1.07816	1.02923	1.02429	1.02813	1.01092	1.03541	1.20277	1.1581	1.29299	1.42982	1.19293	1.40978	1.20454	1.30906	1.33501	1.20766	1.01928	1.00948	1.041	0.93835	1.14811	1.35447	1.48817	1.39045	1.20299		47
16	1.03078	1.14997	1.08088	1.18069	1.05987	1.14123	1.19466	1.12045	1.22115	1.21242	1.14927	1.27726	1.14778	1.12835	1.10563	1.1125	1.05634	1.20074	1.04719	1.12098	1.12069	1.17632	1.12425	1.02912	1.0356	1.01567	1.01272	1.03945	1.24753	1.16052	1.37123	1.383	1.21215	1.28245	1.24493	1.32714	1.26913	1.20102	1.00341	1.07544	1.04527	0.80949	1.32051	1.21234	1.54369	1.29037	1.35218		47
16.5	1.06774	1.21456	1.08412	1.18745	1.10137	1.15462	1.18627	1.11948	1.15415	1.22302	1.14439	1.15439	1.08947	1.14012	1.12952	1.09575	1.12941	1.18421	1.05718	1.18767	1.09608	1.26349	1.11407	1.02482	1.02338	1.01157	1.01353	1.03327	1.19855	1.2021	1.42567	1.37574	1.22258	1.33745	1.25577	1.32962	1.30365	1.27873	1.00874	1.05625	1.13715	0.97833	1.06786	1.43657	1.87862	1.15175	1.43424		47
17	1.08731	1.22007	1.09795	1.19828	1.10417	1.14187	1.13566	1.12185	1.20591	1.22344	1.16093	1.2458	1.12527	1.17038	1.14321	1.11881	1.16	1.20321	1.05314	1.20094	1.16444	1.27146	1.04257	1.0062	1.04729	1.04629	1.0218	1.03455	1.25732	1.14854	1.35981	1.39826	1.21028	1.38681	1.23914	1.37053	1.28465	1.27503	1.01695	1.05056	1.13715	1.03939	1.2562	1.1309	1.56336	1.29887	1.17736		47
17.5	1.03969	1.21243	1.08486	1.16304	1.10823	1.15632	1.14088	1.16046	1.25743	1.23888	1.15698	1.19491	1.20462	1.14382	1.11526	1.17508	1.06885	1.20618	1.08785	1.14922	1.21657	1.23912	1.09002	1.02064	1.03326	1.02141	1.0175	1.05905	1.30903	1.23171	1.43458	1.4272	1.29196	1.42767	1.2888	1.37684	1.34948	1.23998	0.99576	1.1285	1.27266	1.36774	1.1866	1.19293	1.92474	1.64113	1.22089		47
18	1.07095	1.23236	1.06189	1.19802	1.06289	1.13064	1.20059	1.10226	1.27813	1.26152	1.23359	1.25529	1.19907	1.17247	1.18292	1.10972	1.12668	1.24452	1.08679	1.1526	1.13776	1.15184	1.06216	1.0405	1.03907	1.03948	1.02176	1.03467	1.28218	1.28366	1.37768	1.43983	1.24767	1.47153	1.32995	1.41798	1.32973	1.27112	1.03608	1.095	1.18078	1.15722	1.2729	1.13773	2.19017	1.31389	1.31192		47
18.5	1.08922	1.22438	1.13429	1.30488	1.11173	1.18127	1.20231	1.11101	1.27194	1.26725	1.20654	1.23646	1.17902	1.15044	1.13944	1.09119	1.16412	1.21575	1.07461	1.18223	1.13024	1.10788	1.09141	1.02758	1.02357	1.04234	1.00515	1.06308	1.27054	1.17165	1.41349	1.47697	1.29827	1.40516	1.3375	1.41704	1.36921	1.30578	1.01093	1.09032	1.09926	0.98482	1.28446	1.41335	1.70804	1.2295	1.26994		47
19	1.09977	1.18585	1.13089	1.27599	1.11602	1.25811	1.16742	1.10853	1.28608	1.28245	1.17018	1.27971	1.17127	1.15475	1.1831	1.13016	1.14112	1.22494	1.10979	1.20506	1.17383	1.28817	1.07074	1.02098	1.02842	1.03207	1.01636	1.05547	1.30766	1.22128	1.42021	1.49375	1.33409	1.41952	1.35002	1.39877	1.3479	1.29235	1.04669	1.05646	1.15689	1.34496	1.18388	1.23536	1.66171	1.37651	1.29866		47
19.5	1.04237	1.23515	1.07075	1.23423	1.13239	1.15615	1.13449	1.14176	1.23846	1.2649	1.15754	1.20012	1.15991	1.18618	1.2208	1.14623	1.18676	1.17061	1.13736	1.33214	1.19501	1.09513	1.0827	1.02099	1.04355	1.0231	1.01823	1.07165	1.38416	1.24549	1.39035	1.50007	1.32237	1.43317	1.32562	1.46442	1.37451	1.27464	1.06349	1.02899	1.12287	1.03428	0.93903	1.67934	1.78738	1.2981	1.16963		47
20	1.06913	1.28174	1.13055	1.21346	1.11487	1.13109	1.13188	1.06675	1.2648	1.29303	1.21432	1.21872	1.16123	1.19804	1.23197	1.12351	1.16529	1.20459	1.10453	1.24804	1.21992	1.08604	1.05605	1.05292	1.00595	1.05305	1.0247	1.06111	1.281	1.26685	1.43764	1.50862	1.39462	1.40399	1.32695	1.43475	1.38477	1.35552	1.04521	1.11853	1.00579	1.10029	1.09382	1.29424	2.03358	1.69122	1.3586		47
20.5	1.09129	1.24236	1.1215	1.27403	1.13809	1.21174	1.16093	1.10484	1.30841	1.33545	1.20485	1.21377	1.15579	1.20443	1.15958	1.1502	1.13548	1.19341	1.07773	1.18882	1.19137	1.18112	1.10741	1.0545	1.00446	1.0377	1.0287	1.04641	1.31673	1.27325	1.42852	1.53821	1.27349	1.45575	1.42599	1.48229	1.4349	1.28099	1.04371	1.09627	1.1034	1.11288	1.23816	1.18334	1.88222	1.57551	1.20754		47
21	1.10877	1.22958	1.1096	1.25348	1.12909	1.18063	1.12422	1.17154	1.23774	1.29727	1.13668	1.25268	1.15898	1.20016	1.20368	1.13619	1.20791	1.2025	1.1265	1.20601	1.2496	1.03621	1.06821	1.03551	1.01469	1.05141	1.02044	1.07849	1.28297	1.26688	1.44561	1.48062	1.32015	1.49839	1.39699	1.46316	1.39673	1.30321	1.01892	1.09848	1.07982	1.3546	1.22878	1.35516	1.44158	1.36769	1.22625		47
21.5	1.08251	1.27526	1.10785	1.23825	1.12575	1.17591	1.14442	1.07023	1.22416	1.34899	1.18786	1.20133	1.15415	1.20322	1.17739	1.14388	1.15587	1.16406	1.13945	1.1589	1.25091	1.0193	1.13899	1.01768	1.00149	1.09586	1.01091	1.05385	1.29602	1.35501	1.42031	1.52796	1.28238	1.50791	1.37801	1.45445	1.42241	1.33964	1.04615	1.0647	1.10286	1.20978	1.16768	1.21229	1.64466	1.09953	1.20692		47
22	1.07735	1.25705	1.08506	1.18771	1.11306	1.07602	1.22758	1.07823	1.33444	1.26913	1.13646	1.26128	1.09427	1.17327	1.15958	1.1352	1.09531	1.2809	1.09186	1.20831	1.1278	1.28495	1.11172	1.05073	1.01124	1.05973	1.02894	1.06556	1.28228	1.27958	1.44039	1.44811	1.26291	1.46298	1.39017	1.48754	1.41749	1.3507	1.03114	1.11674	1.02179	1.03661	1.10174	1.24197	1.90803	1.44225	1.13964		47
22.5	1.09106	1.21065	1.0831	1.27545	1.16005	1.14479	1.18343	1.12758	1.21388	1.28436	1.17489	1.19832	1.16449	1.1969	1.16726	1.11474	1.19825	1.20431	1.09387	1.19793	1.1451	1.16425	1.07564	1.02333	1.02244	1.0285	1.01776	1.05736	1.34027	1.2838	1.40732	1.48432	1.33052	1.40023	1.41625	1.47253	1.41229	1.3217	1.06497	1.10088	0.98002	1.27396	0.96224	1.34917	1.89119	1.45795	1.21018		47
23	1.07689	1.20273	1.08027	1.13281	1.1022	1.15849	1.15835	1.11694	1.30008	1.25853	1.21156	1.18692	1.18376	1.16823	1.1537	1.13603	1.20224	1.26619	1.10033	1.22492	1.23874	1.04623	1.06911	1.02608	1.01894	1.04699	1.03113	1.08409	1.27625	1.30359	1.44719	1.50633	1.32589	1.38431	1.37763	1.44674	1.39791	1.27444	1.03179	1.07461	1.00774	0.98195	1.11054	1.168	1.64482	1.43175	1.24922		47
23.5	1.04942	1.20237	1.127	1.21597	1.1087	1.10187	1.12409	1.0736	1.26063	1.30262	1.19589	1.22514	1.15789	1.19046	1.12161	1.13684	1.19211	1.25961	1.17453	1.1891	1.18489	1.1514	1.04587	1.05526	1.00019	1.02577	1.00799	1.05649	1.28182	1.28423	1.3553	1.46853	1.30807	1.46817	1.40516	1.45067	1.41545	1.32236	1.05791	1.09464	1.00655	1.03272	1.12168	1.25174	1.98362	1.23135	1.43747		47
24	1.13337	1.21286	1.06444	1.22761	1.06778	1.14878	1.1645	1.17271	1.34461	1.29616	1.17431	1.16045	1.1896	1.1626	1.14632	1.11039	1.11584	1.2074	1.07505	1.17421	1.18166	1.03354	1.08633	1.04016	1.01071	1.01844	1.01773	1.0638	1.27902	1.25939	1.3434	1.41045	1.33015	1.42412	1.3569	1.45548	1.41449	1.29956	1.07278	1.13339	1.13899	1.27724	1.14658	1.3366	1.99412	1.23772	1.18863		47
24.5	1.02864	1.21408	1.08285	1.18506	1.08124	1.13695	1.16798	1.12282	1.31225	1.27553	1.21476	1.19763	1.13578	1.18189	1.17173	1.11643	1.15557	1.20239	1.13492	1.13395	1.15298	1.10133	1.0611	1.03322	1.00457	1.04024	1.00453	1.04679	1.33036	1.21079	1.39607	1.47078	1.29263	1.43034	1.29556	1.45123	1.42717	1.29234	1.04384	1.10482	1.14585	1.04944	1.13813	1.19091	1.62198	1.10423	1.35451		47
25	1.06309	1.20698	1.08708	1.17749	1.11293	1.16866	1.11369	1.11402	1.30081	1.24299	1.20254	1.19242	1.13489	1.19528	1.16191	1.10852	1.18664	1.25351	1.10827	1.22858	1.22725	1.07599	1.0175	1.03306	1.00166	1.04905	1.00315	1.0575	1.34768	1.27949	1.40211	1.46866	1.30971	1.4376	1.32014	1.44197	1.39881	1.17385	1.05294	1.13973	1.06817	0.82697	1.19753	1.43241	1.88699	1.74774	1.34048		47
25.5	1.10034	1.21698	1.09542	1.19409	1.13378	1.18056	1.12842	1.09386	1.29479	1.27932	1.1806	1.09956	1.10824	1.18476	1.17619	1.17168	1.22807	1.24589	1.12027	1.19187	1.15933	1.15692	1.07101	1.03352	0.99518	1.07256	1.01705	1.04992	1.25806	1.226	1.34312	1.44793	1.24861	1.38596	1.36651	1.43515	1.35741	1.22913	1.03959	1.13214	1.04031	1.05967	1.04404	1.25465	1.83888	1.08491	1.30174		47
26	1.12122	1.21729	1.08467	1.21687	1.10037	1.17665	1.0875	1.0837	1.25546	1.27093	1.2121	1.22056	1.14686	1.18022	1.13044	1.14049	1.14133	1.2099	1.06354	1.23257	1.20265	1.0772	0.99799	1.05817	1.00631	1.0504	1.01082	1.05505	1.26055	1.27139	1.30778	1.45263	1.22696	1.38508	1.34657	1.41009	1.40547	1.26578	1.06807	1.09681	0.98475	0.99839	1.10634	1.31354	1.78455	1.07343	1.28142		47
26.5	1.08225	1.22059	1.10669	1.26686	1.0779	1.13846	1.17331	1.09843	1.29083	1.28819	1.18211	1.13636	1.0954	1.18917	1.19925	1.11185	1.21756	1.18494	1.13451	1.12885	1.20542	1.12274	1.07795	1.06181	1.01532	1.03014	1.00547	1.07109	1.26055	1.22198	1.34726	1.39176	1.26044	1.42144	1.37942	1.44143	1.36181	1.30694	1.09057	1.09595	1.08444	0.77412	1.12417	1.06185	1.59668	1.43651	1.05129		47
27	1.07944	1.21405	1.10723	1.2156	1.10344	1.12631	1.20552	1.11914	1.26608	1.28115	1.16565	1.21241	1.09712	1.18842	1.15879	1.142	1.2374	1.25361	1.04741	1.21188	1.08734	1.11107	1.06273	1.0479	1.0382	1.06925	1.01452	1.05905	1.24602	1.28982	1.36277	1.39594	1.24732	1.39768	1.3264	1.42277	1.39658	1.26291	1.05687	1.13851	1.1834	0.99138	1.16445	0.99693	1.54383	1.2243	1.38928		47
27.5	1.12638	1.19524	1.1109	1.19746	1.05754	1.14002	1.12039	1.1008	1.17005	1.29043	1.1626	1.21214	1.11849	1.16533	1.21818	1.13166	1.14127	1.12883	1.08704	1.19897	1.19796	1.06929	1.04147	1.03715	1.01675	1.05995	1.01031	1.05677	1.27361	1.28246	1.36342	1.37243	1.2419	1.35597	1.33529	1.36674	1.34459	1.2266	1.07321	1.12149	0.87128	0.8105	1.08568	1.08644	1.40642	1.3613	1.28228		47
28	1.12443	1.15835	1.1049	1.17244	1.10902	1.14202	1.09858	1.08704	1.2279	1.24195	1.13938	1.21676	1.14963	1.15236	1.13142	1.16247	1.20461	1.22001	1.05157	1.15857	1.19063	1.04195	1.08186	1.04021	1.02885	1.06663	1.01107	1.0741	1.31454	1.23572	1.35844	1.39427	1.25049	1.31504	1.32672	1.39854	1.36015	1.29098	1.05901	1.12375	1.09101	0.86218	0.92974	1.18877	1.71002	1.18172	1.29493		47
28.5	1.10277	1.1869	1.08296	1.21856	1.06923	1.16409	1.1678	1.10181	1.15758	1.29839	1.19906	1.17853	1.12711	1.15559	1.15094	1.08535	1.22443	1.16609	1.02888	1.18934	1.17348	1.03269	1.06684	1.03963	1.00453	1.05635	1.01148	1.04426	1.29319	1.22964	1.33398	1.38798	1.2883	1.41768	1.29497	1.42873	1.34604	1.25298	1.09227	1.09094	1.07165	0.9004	0.92853	1.46308	1.60742	1.63343	1.31068		47
29	1.10293	1.16321	1.06117	1.16388	1.06476	1.1427	1.08563	1.10051	1.21456	1.23541	1.15453	1.14949	1.11471	1.15997	1.16991	1.08868	1.15321	1.17713	1.06217	1.17389	1.13047	1.10953	1.07455	1.02435	1.00463	1.06521	0.99912	1.05071	1.20851	1.25726	1.33576	1.36273	1.26679	1.37545	1.3441	1.41386	1.34832	1.2288	1.05108	1.10036	0.95708	0.89007	1.1432	1.16364	1.77404	1.56329	1.22732		47
29.5	1.12536	1.24135	1.08777	1.1279	1.10083	1.18577	1.12541	1.07104	1.22843	1.24534	1.10569	1.22129	1.14705	1.16891	1.14961	1.13308	1.1855	1.20515	1.08376	1.21316	1.22649	1.1815	1.07313	1.02418	1.02512	1.04277	1.00387	1.02542	1.21278	1.22555	1.32682	1.33501	1.21275	1.32497	1.29577	1.36471	1.29611	1.2219	1.07111	1.11367	1.00436	1.0562	0.90699	1.19789	1.51679	0.82794	1.12471		47
30	1.07801	1.18571	1.05402	1.17399	1.08971	1.16237	1.08769	1.15343	1.24	1.27652	1.15184	1.1495	1.05661	1.14947	1.14807	1.09436	1.18342	1.19991	1.093	1.17623	1.21482	0.9388	1.06849	1.04076	1.01452	1.05482	0.99749	1.03922	1.22849	1.23774	1.38394	1.34824	1.22104	1.28359	1.30353	1.37301	1.32679	1.30324	1.03643	1.10501	1.08257	1.00423	1.16184	1.13616	1.6556	1.47387	1.1595		47
30.5	1.07609	1.19585	1.06393	1.15398	1.10411	1.12088	1.07923	1.07468	1.24308	1.2473	1.10472	1.16017	1.11268	1.1477	1.12945	1.13152	1.07606	1.16042	1.06986	1.18906	1.1505	1.13717	1.05041	1.0267	1.00235	1.04914	0.9995	1.02824	1.20742	1.1855	1.32673	1.35779	1.19194	1.27244	1.31906	1.3264	1.3244	1.23968	1.06921	1.11375	1.09009	1.11417	1.00412	1.24886	1.44068	1.00418	1.10667		47
31	1.09404	1.22202	1.08117	1.11552	1.07597	1.13484	1.11342	1.10923	1.31101	1.20002	1.15128	1.15239	1.11448	1.15316	1.13705	1.09361	1.17435	1.16788	1.04767	1.16632	1.17048	1.04847	1.0777	1.04318	1.01149	1.04798	1.00731	1.04162	1.2947	1.23968	1.34191	1.37084	1.24751	1.33864	1.34054	1.35333	1.30098	1.23875	1.03831	1.14951	1.00129	0.83227	0.87537	1.01899	1.57719	1.32954	1.29233		47
31.5	1.05845	1.17487	1.05214	1.15987	1.08188	1.19014	1.18954	1.0517	1.15193	1.25763	1.07741	1.09401	1.0808	1.13115	1.06625	1.11043	1.14612	1.18129	1.04083	1.13016	1.17039	1.06544	1.05177	1.02557	1.00967	1.07258	1.00339	1.03062	1.22708	1.20411	1.32315	1.36261	1.23455	1.30399	1.28047	1.34138	1.2917	1.23026	1.05629	1.13487	0.97726	0.91291	1.12591	0.89542	1.63568	1.38368	1.2383		47
32	1.0708	1.20174	1.04695	1.13954	1.06805	1.08909	1.17619	1.10966	1.21703	1.22041	1.09553	1.14349	1.10577	1.14086	1.08347	1.06496	1.07662	1.10862	1.06444	1.15245	1.14485	0.99807	1.03194	1.03839	1.00022	1.03528	1.01349	1.03383	1.19399	1.17649	1.31154	1.3102	1.18399	1.32969	1.27289	1.36082	1.28346	1.22772	1.07462	1.12538	1.13912	0.90559	1.13198	1.17846	1.79377	1.24845	1.26956		47
32.5	1.08124	1.13792	1.07252	1.12375	1.06204	1.1033	1.16447	1.0958	1.18001	1.20245	1.1043	1.12134	1.06994	1.16505	1.1128	1.09811	1.15773	1.1394	1.01868	1.09493	1.15796	0.98141	1.08289	1.02743	1.01135	1.04979	1.00767	1.03183	1.25301	1.21634	1.29731	1.35284	1.19561	1.30053	1.30858	1.32382	1.28647	1.18817	1.07319	1.11113	1.0259	0.87463	0.9424	1.0222	1.56773	1.20925	1.25114		47
33	1.03944	1.12343	1.05918	1.15037	1.05059	1.09649	1.05822	1.09594	1.11102	1.20177	1.10956	1.13406	1.06625	1.14068	1.15472	1.18128	1.10388	1.16743	1.07279	1.15972	1.12903	1.04502	1.05546	1.01942	1.00055	1.0712	1.00351	1.03904	1.20637	1.17413	1.30143	1.2839	1.12987	1.30615	1.27053	1.27618	1.30852	1.17854	1.07754	1.11547	1.0727	1.01476	1.13047	1.01977	1.54163	1.23352	1.20506		47
33.5	1.05311	1.16557	1.06869	1.08989	1.05357	1.15317	1.07078	1.088	1.23834	1.21936	1.07869	1.12805	1.04178	1.14715	1.07591	1.11295	1.16379	1.1558	1.07243	1.11043	1.16483	1.10287	1.0263	1.02698	1.00037	1.05936	1.002	1.04497	1.20367	1.18595	1.31933	1.36976	1.20352	1.30196	1.29527	1.29373	1.2994	1.20398	1.04358	1.11856	1.08316	0.74232	1.03621	1.21695	1.59468	1.10464	1.19928		47
34	1.03609	1.13795	1.05063	1.13069	1.02074	1.14774	1.04497	1.08326	1.19964	1.19224	1.08772	1.11186	1.11078	1.13693	1.14156	1.09968	1.10513	1.21483	1.08185	1.14006	1.11485	1.15232	0.98608	1.01229	1.00251	1.03423	1.00331	1.03413	1.14003	1.18171	1.28548	1.29488	1.13889	1.21739	1.26305	1.32523	1.24706	1.22288	1.03559	1.12681	0.97909	0.95307	0.91472	1.18027	1.58203	1.14874	1.35007		47
34.5	1.12559	1.13466	1.06975	1.12386	1.04241	1.07971	1.07767	1.12076	1.1612	1.18975	1.10403	1.14749	1.0672	1.12469	1.12033	1.09857	1.13975	1.14697	1.06276	1.06529	1.1373	0.98325	1.03627	1.02754	0.98287	1.05544	1.00773	1.04272	1.25997	1.16898	1.27023	1.3367	1.14116	1.2542	1.255	1.28792	1.28401	1.17966	1.03523	1.06451	1.07234	1.03978	1.01448	1.16017	1.48671	1.3311	1.11507		47
35	1.06299	1.15009	1.0467	1.15572	1.03624	1.09989	1.08656	1.02606	1.20754	1.19835	1.08908	1.12777	1.05378	1.12206	1.10435	1.06872	1.09436	1.14442	1.04642	1.06474	1.06197	1.09689	1.03634	1.017	0.98386	1.04366	1.00876	1.0325	1.16748	1.18328	1.28822	1.26978	1.21031	1.26229	1.26447	1.30768	1.27652	1.19222	1.04923	1.1118	0.94646	0.83029	1.07006	0.98501	1.48112	1.05604	1.11346		47
35.5	1.08019	1.13822	1.04621	1.1639	1.04185	1.11086	1.11387	1.06326	1.18471	1.23846	1.05756	1.10517	1.04596	1.13535	1.12329	1.06401	1.11718	1.13466	1.03374	1.11742	1.12936	1.07692	1.00047	1.02419	0.98648	1.03208	1.00219	1.02575	1.19361	1.11671	1.29448	1.30881	1.15784	1.2913	1.24017	1.29207	1.20296	1.21381	1.04797	1.13638	1.10251	0.82135	0.84704	1.20141	1.38293	1.42299	1.10522		47
36	1.07597	1.11413	1.06934	1.14104	1.03515	1.09491	1.07945	1.07946	1.21787	1.20762	1.11699	1.13349	1.04286	1.12444	1.08564	1.10349	1.01766	1.13379	1.0631	1.07985	1.09605	1.03371	0.98577	1.04801	0.99956	1.02801	1.00468	1.04839	1.21655	1.20561	1.25405	1.32752	1.21263	1.25874	1.23923	1.28874	1.24634	1.12583	1.05725	1.134	0.97936	0.92377	0.93259	1.11319	1.35448	1.25567	1.01495		47
36.5	1.03848	1.12799	1.02864	1.10305	1.04627	1.05933	1.07693	1.03989	1.17208	1.19978	1.08219	1.06401	1.06091	1.13021	1.0482	1.06589	1.07558	1.12471	1.08893	1.10072	1.11022	1.05113	0.99763	1.02325	0.99142	1.02851	1.00969	1.02886	1.1751	1.13711	1.27026	1.30122	1.23815	1.23499	1.1805	1.26838	1.23737	1.16104	1.04328	1.14213	1.09477	1.1427	1.08481	0.91427	1.65275	1.05669	1.07288		47
37	1.06629	1.1569	1.02804	1.14339	1.06712	1.10242	1.1021	1.0578	1.20414	1.22486	1.10593	1.14981	1.09151	1.13799	1.11699	1.10197	1.09929	1.14955	1.04673	1.09891	1.15923	0.99714	1.03237	1.00938	0.99845	1.03878	0.99594	1.03226	1.17821	1.1584	1.24239	1.34685	1.1849	1.2839	1.17525	1.24475	1.2698	1.16858	1.04559	1.13249	0.99828	0.66978	0.75183	1.09619	1.28738	1.42234	1.0704		47
37.5	1.05188	1.10503	1.03399	1.15012	1.05862	1.07436	1.09239	1.1174	1.20787	1.20814	1.10465	1.11963	1.14737	1.11599	1.07983	1.08128	1.06337	1.09173	1.0549	1.14096	1.13544	1.05606	1.02206	1.01641	0.99348	1.03667	0.99493	1.02283	1.20572	1.19623	1.31679	1.32819	1.1227	1.2096	1.23627	1.25416	1.20478	1.11763	1.05795	1.14539	1.03619	0.72803	0.87553	0.79335	1.25584	1.05031	1.15418		47
38	1.00611	1.15434	1.02832	1.12807	1.03929	1.0785	1.09084	1.02595	1.13974	1.20579	1.07517	1.08046	1.10622	1.12279	1.07259	1.0894	1.0377	1.14084	1.04864	1.12049	1.08781	0.96612	1.01397	1.00943	0.99702	1.04838	0.99849	1.02323	1.17439	1.13117	1.24521	1.28315	1.13831	1.25293	1.20553	1.27936	1.23915	1.15097	1.04089	1.11111	0.92799	0.93109	1.1338	1.11784	1.43512	1.18133	1.10845		47
38.5	1.04085	1.19306	1.02821	1.16597	1.0618	1.0977	1.0411	1.09093	1.10028	1.20713	1.07159	1.08609	1.09145	1.12393	1.10458	1.07302	1.13889	1.18513	1.01082	1.06033	1.04364	1.09233	1.03354	1.02522	0.98235	1.01772	1.00573	1.02176	1.23787	1.12229	1.23503	1.26822	1.12168	1.25486	1.21147	1.25899	1.24259	1.15276	1.05317	1.13127	0.96288	0.95721	0.92093	1.15179	1.56041	1.22895	1.19906		47
39	1.06274	1.14909	1.03285	1.08783	1.08662	1.07077	1.02913	1.04888	1.13411	1.21409	1.10388	0.99286	1.08701	1.11696	1.12424	1.13836	1.10619	1.108	1.05268	1.12552	1.0901	1.11313	0.99398	1.01319	0.9764	1.01047	0.99133	1.01983	1.22131	1.17197	1.25226	1.23691	1.14904	1.18476	1.20204	1.2314	1.2538	1.15548	1.06136	1.13892	0.90727	0.81363	1.03305	1.13225	1.4777	1.17392	1.15906		47
39.5	1.00527	1.13139	1.03376	1.12399	1.02486	1.04506	1.03801	1.08676	1.16533	1.19361	1.04882	1.10236	1.05693	1.10382	1.08313	1.05234	1.01371	1.10116	1.01224	1.09585	1.1052	1.05693	1.02013	1.03008	0.98822	1.01953	0.9918	1.02927	1.16036	1.10337	1.22967	1.27496	1.21278	1.24526	1.21516	1.25223	1.25216	1.10722	1.03901	1.11754	0.99598	0.84518	1.10626	1.05112	1.59923	1.40062	1.15794		47
40	1.04826	1.12123	1.03975	1.0906	1.02429	1.09417	1.00061	1.06118	1.16539	1.2029	1.05895	1.09358	1.09294	1.10972	1.02814	1.05794	1.02802	1.05639	1.02885	1.0626	1.09894	1.01678	0.97509	1.02829	0.97228	1.04669	0.99442	1.04077	1.18573	1.15261	1.23311	1.27513	1.05892	1.21798	1.19409	1.23341	1.23331	1.14692	1.04623	1.10901	1.00486	0.85025	1.13171	1.0391	1.53234	1.04239	1.29482		47
40.5	1.03891	1.11025	1.04031	1.10911	1.04755	1.07658	1.05718	1.08682	1.10197	1.15126	1.0719	1.08044	1.08	1.11231	1.11561	1.07183	1.08932	1.09679	1.02055	1.10872	1.10878	0.99536	1.00639	1.0465	0.98304	1.02819	0.98915	1.01351	1.1816	1.13379	1.20864	1.26936	1.10021	1.20197	1.20704	1.24728	1.24238	1.07622	1.04502	1.11419	0.87733	0.82965	0.77244	1.18769	1.40272	1.18471	1.10813		47
41	1.02893	1.11294	1.03633	1.12824	1.01765	1.08034	1.04246	1.05691	1.16027	1.18997	1.02219	1.05505	1.05289	1.09592	1.13276	1.12083	1.14496	1.1093	1.0155	1.05737	1.06126	1.03461	0.99271	1.01655	0.99566	1.02364	0.99516	1.01521	1.1382	1.11797	1.22541	1.26543	1.10038	1.24845	1.17194	1.24847	1.22227	1.14394	1.01693	1.1042	1.03924	1.04338	1.10683	1.18567	1.42076	1.1484	1.18476		47
41.5	1.04343	1.14797	1.0146	1.11263	1.02633	1.05735	1.08428	1.0734	1.11399	1.17744	1.06649	1.04585	1.0681	1.11911	1.08411	1.08121	1.10353	1.09652	1.00736	1.12063	1.11267	1.09598	0.98893	1.01946	0.96902	1.02435	0.99361	1.02092	1.12699	1.11069	1.24355	1.25703	1.10006	1.23848	1.17543	1.21847	1.18911	1.16035	1.04894	1.11632	0.99648	0.86568	0.95826	1.11929	1.5478	1.23742	1.05022		47
42	1.0184	1.12892	1.04013	1.07283	1.03392	1.07482	1.05157	1.0336	1.17938	1.15934	1.06301	1.06081	1.06158	1.12215	1.11016	1.088	1.02184	1.13738	0.99116	1.14112	1.11881	0.98753	1.01973	1.02944	0.97597	1.03264	0.99418	1.01631	1.18927	1.04442	1.25657	1.27415	1.09902	1.17095	1.14793	1.24765	1.23578	1.10742	1.03373	1.09803	0.88918	0.82168	0.98065	1.17398	1.31394	1.18196	1.06087		47
42.5	1.03213	1.13564	1.0328	1.1191	1.025	1.081	1.05294	1.04899	1.20744	1.15046	1.0212	1.10585	1.0678	1.09837	1.03865	1.05834	1.01731	1.07934	1.01013	1.11627	1.07952	1.08562	0.97971	1.01857	0.99807	1.03136	0.98556	1.01913	1.11006	1.12131	1.22548	1.22912	1.10199	1.17136	1.21343	1.20512	1.21151	1.14256	1.03777	1.11669	1.03545	0.86125	1.03644	1.063	1.14042	1.35262	1.03879		47
43	1.04544	1.13078	1.02382	1.0533	1.01849	1.0276	1.00292	1.0787	1.10829	1.16711	1.09074	1.10126	1.08295	1.12176	1.10914	1.01131	1.03462	1.14347	0.98415	1.1205	1.05163	1.08132	1.02933	0.99789	0.9765	1.03162	0.98932	1.03101	1.14368	1.12414	1.22625	1.19431	1.12072	1.1466	1.18898	1.20999	1.20206	1.10268	1.04607	1.11004	1.06415	0.70417	0.97917	1.22224	1.27588	1.24065	1.22402		47
43.5	1.01879	1.1362	1.01003	1.11102	1.02275	1.06274	1.05119	1.04808	1.12782	1.15131	1.04437	1.04366	1.04802	1.12313	1.02394	1.06745	1.02042	1.05885	1.01302	1.09697	1.05498	1.05689	1.03732	1.01109	0.9802	1.03561	0.98858	1.00558	1.13183	1.14664	1.19017	1.22892	1.14348	1.20323	1.18454	1.19837	1.19559	1.09542	1.02243	1.07924	0.94833	0.87577	1.07956	0.98844	1.40108	1.12299	1.1405		47
44	1.00136	1.13175	1.04843	1.0864	1.00978	1.0321	1.00723	1.02308	1.12005	1.1734	1.05217	1.1009	1.08014	1.10718	1.07592	1.01803	1.05341	1.04556	1.00913	1.04731	1.07123	0.96607	1.00901	1.01363	0.97931	1.02283	0.99732	1.01961	1.10027	1.10955	1.22144	1.19958	1.1053	1.13942	1.16119	1.19559	1.18433	1.09574	1.02611	1.07207	1.02569	0.82265	0.97576	1.04511	1.3999	1.12294	1.17991		47
44.5	1.04128	1.11574	1.02788	1.09116	1.01851	1.05776	1.018	1.08828	1.08417	1.17138	1.07258	1.11335	1.04217	1.0895	1.09043	1.07313	1.00545	1.11942	1.01369	1.0533	1.05052	0.99302	1.02785	1.01517	0.9792	1.03362	0.98784	1.02368	1.12236	1.09017	1.21375	1.19349	1.09648	1.22742	1.14324	1.15573	1.17102	1.08949	1.02211	1.10806	1.025	0.81555	1.12268	1.08134	1.35727	0.97373	1.13484		47
45	1.00522	1.14853	1.02386	1.12145	1.03552	1.04435	0.9553	1.00192	1.09451	1.16667	1.06786	1.07509	1.07701	1.09341	1.00567	1.0345	1.09277	1.08954	0.99707	1.05414	1.07534	0.98659	1.02633	1.01919	0.97577	1.02428	0.99284	1.00871	1.1202	1.09567	1.17401	1.22206	1.09598	1.10714	1.15621	1.17423	1.16327	1.07013	1.01235	1.05831	1.04178	0.75769	0.97497	0.95608	1.15692	1.03284	1.20097		47
45.5	1.02401	1.12069	1.0381	1.03476	0.99326	1.02994	1.04537	1.04697	1.14217	1.15719	1.03428	1.03577	1.05037	1.10205	1.08468	1.05679	1.00542	1.07791	1.05562	1.05817	1.07755	0.95934	0.99922	0.99754	0.97114	1.0221	0.99285	1.01406	1.16668	1.08729	1.21021	1.21041	1.03455	1.16804	1.13138	1.16934	1.13721	1.06831	1.00501	1.07507	0.97989	0.80215	0.89824	1.0976	1.31086	1.08276	1.15677		47
46	1.0235	1.15352	1.03035	1.09894	0.99881	1.06518	1.00318	1.03621	1.08019	1.18014	1.09843	1.05539	1.05806	1.10176	1.05156	1.00573	1.00423	1.10489	1.01544	1.066	1.0255	0.99638	1.01379	1.01599	0.99643	1.02528	0.98917	1.00937	1.11062	1.06908	1.21724	1.22416	1.08441	1.13529	1.15903	1.15152	1.16656	1.09459	1.001	1.08509	0.96192	0.79129	1.03192	1.10417	1.45469	1.05448	1.22786		47
46.5	1.015	1.12279	1.03099	1.1162	1.02649	1.01877	1.03522	1.04733	1.15076	1.17218	1.0829	1.0632	1.06094	1.07993	1.07237	1.05986	0.99601	1.12532	1.02062	1.01026	0.99198	0.96819	0.99604	1.00303	0.98352	1.04089	0.99563	1.00053	1.17759	1.08131	1.17561	1.17728	1.05237	1.11298	1.15136	1.17539	1.12882	1.08087	1.01442	1.07859	0.90261	1.03128	1.1843	1.01252	1.22824	1.3421	1.08365		47
47	1.03871	1.13935	1.03906	1.13329	1.03345	1.06549	1.03266	1.0195	1.08472	1.13741	1.05578	1.05492	1.04852	1.08016	1.01516	1.03011	1.08425	1.09259	1.02653	1.08224	1.02499	1.01715	0.98214	1.00845	0.97909	1.01248	0.99457	1.00083	1.13759	1.0754	1.20587	1.1892	1.06667	1.15389	1.1729	1.15986	1.14549	1.08681	1.00009	1.04206	1.05499	0.92738	1.03089	1.13074	1.23164	1.07436	1.11487		47
47.5	1.02677	1.11188	1.0427	1.08833	1.02066	1.06545	0.98157	1.0045	1.05336	1.14318	1.08163	1.07524	1.06196	1.08543	1.09038	1.0435	1.02024	1.07235	0.99922	1.00071	1.07292	0.90802	1.00775	1.01597	0.98222	0.99823	0.98923	1.02296	1.13334	1.07744	1.15295	1.214	1.11121	1.13739	1.15243	1.16212	1.1942	1.06914	1.02987	1.01566	1.01615	0.83081	1.06196	1.12841	1.39501	1.12111	1.06895		47
48	1.00297	1.12293	1.01319	1.08964	1.01689	1.06005	1.00594	0.99671	1.0946	1.12715	1.01238	1.0612	1.05024	1.07938	1.04579	1.08779	1.05418	1.11759	1.00972	1.08682	1.04094	0.97528	1.03107	1.00879	0.9568	1.02363	0.98372	0.99556	1.11315	1.08121	1.18882	1.2222	1.04619	1.11393	1.1167	1.17909	1.14164	1.097	1.00661	1.01486	1.02323	0.90747	0.97536	1.10055	1.2428	1.05945	1.00355		47
48.5	1.02203	1.12413	1.03763	1.04229	1.01127	1.07031	1.02187	0.99467	1.14448	1.11639	1.06623	1.07091	1.04713	1.07577	1.04552	1.01528	1.03211	1.09769	1.00124	1.06628	1.00878	1.02762	1.01604	1.01158	0.97725	1.01104	0.99242	1.00951	1.09487	1.02847	1.19494	1.2275	1.01401	1.10115	1.12895	1.14368	1.11398	1.06467	1.02254	1.01257	0.94203	0.83934	0.99805	1.01391	1.3816	1.19559	1.12575		47
49	1.01079	1.13324	1.02914	1.04388	1.02853	1.06568	1.01528	1.03355	1.08579	1.14017	1.02108	1.09936	1.02019	1.081	1.01738	1.06083	1.00413	1.07767	1.00328	1.01748	1.05732	1.00309	1.02926	1.00955	0.96387	1.01569	0.99867	1.01483	1.09856	1.09011	1.14198	1.20543	1.04764	1.12203	1.13745	1.14981	1.18498	1.07054	0.9918	1.02738	0.9344	0.94662	1.11138	0.89248	1.28525	1.02513	1.26627		47
49.5	1.00207	1.14162	1.02805	1.08763	1.02144	1.08986	1.01257	1.03734	1.12543	1.12824	1.07096	1.06359	1.06761	1.07865	1.04958	1.06514	1.04887	1.03605	1.02766	1.04486	1.0309	0.96881	1.00405	1.03167	0.9746	1.00981	0.98643	1.02048	1.09685	1.04853	1.18567	1.15577	1.08264	1.16471	1.12877	1.19034	1.16133	1.06252	1.00219	1.01631	1.06145	0.91925	1.09067	0.95175	1.11388	1.22945	1.07965		47
50	1.03411	1.09792	1.04522	1.06909	1.03075	1.06264	1.02833	1.02123	1.09399	1.11491	1.05681	1.06291	1.04017	1.0903	1.05557	1.03055	0.9541	1.07725	1.01783	1.0015	1.0188	0.97174	0.9865	1.01107	0.97502	1.01566	0.98805	1.01573	1.10812	1.08186	1.16428	1.17105	1.03543	1.10944	1.15317	1.14014	1.12359	1.04845	1.0047	1.02224	0.95562	0.75243	1.1083	1.04186	1.24181	1.1718	1.1356		47
50.5	1.02232	1.15537	1.04387	1.07071	1.01437	1.06491	1.05758	1.05535	1.05278	1.09594	1.09442	1.07902	1.02761	1.06681	1.03584	1.06101	1.06093	1.04157	0.97251	1.01821	1.04548	0.96268	0.99287	1.00201	0.96216	1.01631	0.99686	0.99656	1.13579	1.06272	1.14725	1.17399	1.02437	1.08995	1.14281	1.1313	1.15327	1.02931	1.00905	1.00964	1.04719	0.96358	1.15594	0.91485	1.20483	0.94172	1.06989		47
51	1.0558	1.07902	1.04928	1.05292	1.02339	1.09002	1.06029	1.01815	1.09824	1.14882	1.06999	1.06569	1.06272	1.07597	1.02034	0.99221	1.00385	1.07365	0.98872	1.03955	0.99217	0.98092	0.98862	1.01627	0.97495	0.99617	0.98982	1.00141	1.1635	1.08133	1.17234	1.15389	1.06912	1.09502	1.11098	1.13477	1.15955	1.0141	0.99632	1.02272	1.03329	0.81307	0.99521	1.03423	1.0276	1.11925	1.14321		47
51.5	0.99555	1.08534	1.03319	1.04879	1.00784	1.04476	1.04559	1.03763	1.11738	1.11087	1.06521	1.06371	1.04647	1.073	1.02924	1.04109	1.04678	1.08366	1.00374	1.04629	0.9959	1.08652	1.00642	1.0141	0.97174	1.00492	0.99566	0.99884	1.12105	1.08678	1.16518	1.1377	1.0353	1.08336	1.11653	1.12064	1.13352	1.03312	0.98482	1.00846	0.9406	0.88687	1.08686	0.86653	1.40241	1.35027	1.24793		47
52	1.02033	1.0852	1.02364	1.07002	1.04119	1.03915	1.02729	1.04171	1.13769	1.12091	1.03813	1.07897	1.04838	1.07584	1.01025	1.03402	1.05294	1.10932	0.99676	1.05421	1.03398	0.94509	1.01833	1.00816	0.95524	0.99673	0.98824	1.00195	1.10639	1.04245	1.16764	1.12339	1.03811	1.12663	1.09447	1.12787	1.13177	1.08141	1.00192	0.98939	1.02452	0.94172	1.0558	0.93351	1.51305	1.30755	1.08981		47
52.5	1.04638	1.11067	1.02568	1.06242	1.01406	1.02013	1.01571	1.02442	1.08823	1.08578	1.02516	1.05898	1.04962	1.0655	1.00293	1.03471	1.00512	1.08644	0.98415	1.03381	1.03698	0.99516	1.02633	1.01717	0.97543	1.00575	0.99156	1.00878	1.10761	1.0923	1.12422	1.17685	1.01947	1.10249	1.10367	1.13824	1.13102	1.02427	0.99759	0.9975	1.06516	0.98263	0.96496	1.03793	1.31259	0.9697	1.17862		47
53	1.02496	1.09215	0.99802	1.04779	1.02079	1.02126	0.98828	1.02265	1.06726	1.12845	1.0632	1.06781	1.03392	1.06692	0.99268	1.00781	1.00787	1.05886	0.99711	1.02951	0.96959	0.90893	1.02079	1.01829	0.96359	1.00028	0.98771	1.00854	1.09852	1.06638	1.14243	1.11317	1.03443	1.07664	1.10888	1.09834	1.14505	1.0285	0.99127	0.99643	0.99109	0.974	1.04377	1.19534	1.53265	1.07045	1.08552		47
53.5	1.02304	1.12442	1.01647	1.05696	1.00718	1.0628	1.01367	1.00217	1.09589	1.08037	1.03748	1.02605	1.03494	1.06603	1.02368	0.99675	1.02321	1.05106	0.97025	1.01666	1.01696	1.01296	0.93999	1.01813	0.95458	1.01393	0.99559	1.01336	1.12397	1.05026	1.10021	1.17349	1.06039	1.12762	1.11952	1.12396	1.12142	1.06127	0.9911	0.9789	0.99981	0.82292	1.01105	0.92624	1.35668	0.85483	1.02045		47
54	1.005	1.07912	1.01282	1.06741	1.00532	1.05649	0.99762	1.02675	1.08674	1.09846	1.0581	1.00786	1.0154	1.06662	1.01796	1.03468	1.01606	1.04498	0.96916	1.02715	1.03679	0.98727	0.98372	1.01841	0.97248	1.00105	0.98961	1.01971	1.1304	1.03085	1.13297	1.15377	1.03205	1.12211	1.07504	1.11196	1.11824	1.02872	0.99572	0.97036	0.89776	0.78705	1.01533	0.96629	1.33251	1.11461	1.23327		47
54.5	1.02141	1.06672	1.01172	1.05664	0.98799	1.06488	1.04158	1.01073	1.12078	1.0773	1.01633	1.10274	1.01066	1.07327	1.01114	1.05115	1.00547	1.03139	0.97749	1.01028	1.0044	0.98206	0.96686	1.0094	0.9639	1.00611	0.99623	0.99916	1.1241	1.10486	1.16326	1.1105	1.02963	1.11912	1.07231	1.10778	1.09116	1.01281	1.00575	1.00029	1.01988	0.83201	0.91815	0.95792	1.39612	1.09176	1.20343		47
55	1.02295	1.08968	1.00178	1.06007	0.99636	1.03754	0.99117	1.0471	1.05217	1.10954	1.04127	1.05107	1.0128	1.07497	1.02406	1.06161	1.06465	1.09721	1.00198	1.00932	1.00631	0.93387	0.995	1.00653	0.94853	0.9863	0.99381	0.99714	1.09646	1.0714	1.12841	1.1927	0.999	1.07827	1.07851	1.10475	1.09828	0.99285	1.00654	0.96053	1.03917	0.73842	0.96563	0.90559	1.19361	1.09347	1.07368		47
55.5	1.04212	1.08945	1.02294	1.04233	1.02472	1.02827	1.01218	1.03692	1.06793	1.08435	1.01197	1.04166	1.02923	1.06543	1.03395	1.0365	0.99209	1.0703	0.99129	1.03147	1.01273	0.95632	0.96405	1.00933	0.96798	0.99911	0.9875	1.01427	1.09133	1.07846	1.12769	1.12119	1.05787	1.07688	1.1053	1.12637	1.09526	1.04766	0.98113	0.97599	1.03627	0.91817	1.05058	0.91504	1.25227	1.05272	1.20423		47
56	1.01885	1.07614	1.00798	1.05396	1.02463	1.01987	0.96408	1.01139	1.10426	1.10429	1.03935	1.07112	0.99402	1.06925	1.03392	1.06497	0.99363	1.05119	0.98047	1.02723	1.02317	0.97189	1.00122	1.02253	0.97613	0.9983	0.98837	1.00352	1.12626	1.06712	1.12369	1.12003	1.02626	1.12007	1.09411	1.10481	1.10618	1.04013	0.98404	0.97715	1.01679	0.9343	1.13004	1.0626	1.31821	1.18703	1.21188		47
56.5	1.04528	1.09879	1.00887	1.01148	1.00637	1.01902	1.03745	1.01361	1.09041	1.11726	1.02251	1.03586	1.00378	1.05961	1.03086	1.04235	0.96876	1.02852	0.95416	1.00593	1.03915	0.97735	1.0382	1.02478	0.97553	1.00016	1.00206	1.00599	1.15176	1.04995	1.13603	1.16734	1.04796	1.07356	1.09424	1.10109	1.10465	1.03459	0.99017	0.99955	1.04416	0.89755	1.06951	1.05645	1.25109	0.9296	1.07525		47
57	1.00694	1.07959	1.0107	1.06251	0.9928	1.03868	1.04029	1.04898	1.05934	1.07503	1.01737	1.04107	1.00043	1.06335	1.08584	1.0462	0.98982	1.05188	0.97821	1.04062	1.03517	1.03666	0.98206	1.01555	0.97088	0.99584	0.9861	1.00385	1.12319	1.0563	1.10423	1.12816	0.99928	1.04717	1.08463	1.09315	1.12762	1.03538	1.00704	0.97346	1.04251	0.73977	0.89286	1.1414	1.31901	1.28046	1.06964		47
57.5	1.01529	1.09524	1.01987	1.05695	1.00572	1.01865	0.99833	1.03594	1.11805	1.08455	1.03078	1.03765	0.99394	1.04913	1.01878	1.02258	1.01697	1.04408	0.97688	1.0387	0.99643	0.93372	0.99681	1.00427	0.95808	1.00854	0.98953	0.99116	1.0732	1.01929	1.11893	1.14842	0.97686	1.06123	1.08994	1.05699	1.08008	0.99772	0.99777	0.96567	1.02047	0.8181	1.08656	0.973	1.43087	0.95544	1.24359		47
58	1.01572	1.09995	1.01936	1.07681	1.00685	1.02398	0.98371	1.00514	1.10607	1.0745	1.00972	1.06055	1.00395	1.06011	1.03941	1.00569	0.9981	1.07299	1.01057	1.03965	1.00948	0.93726	1.01568	1.01103	0.96762	1.00327	1.00165	0.99494	1.10428	1.0338	1.10813	1.11965	1.00672	1.08872	1.06931	1.08561	1.08076	1.06329	0.9941	0.95869	1.00739	0.96279	0.94736	1.04691	1.09504	1.08717	1.01741		47
58.5	1.02203	1.08687	1.00866	1.06171	0.99929	1.04298	1.01398	1.03087	1.07631	1.0505	0.98919	1.02701	0.9857	1.06303	1.03497	1.03677	1.05971	1.05574	0.98636	1.02091	1.00909	0.94235	0.9999	1.00802	0.9799	0.9971	0.99457	1.00566	1.07415	1.02077	1.11637	1.13236	1.03477	1.09192	1.07314	1.08606	1.12641	1.05119	0.97972	0.9602	0.97935	1.06194	1.05046	1.11251	1.5022	1.00252	1.07512		47
59	1.00466	1.05995	0.99427	1.03762	1.00322	1.04407	0.99847	1.03702	1.09175	1.09619	1.01048	1.02195	0.98977	1.05922	1.03137	1.0361	0.97611	1.05521	0.97132	1.04803	1.03059	0.90265	1.00332	1.00255	0.96144	0.99839	0.98808	1.00125	1.11643	1.02131	1.1227	1.14856	0.99967	1.05151	1.06149	1.07155	1.0941	1.0224	0.98671	0.99006	0.91324	0.8959	0.9688	0.94325	1.1983	0.93351	1.13481		47
59.5	1.00744	1.0717	1.01827	1.04712	1.0053	1.01354	0.98181	1.02207	1.0668	1.09353	1.01623	1.00499	0.98643	1.06293	1.03214	1.04648	0.9957	1.0658	0.98257	1.04302	0.99903	1.02167	1.02099	1.01453	0.96026	1.0165	0.99606	0.99754	1.10641	1.04622	1.10419	1.08106	1.01916	1.05651	1.05708	1.08551	1.10536	1.02351	0.96904	0.97431	0.98419	0.80564	0.95454	0.97748	1.18415	1.03969	1.07686		47
60	1.03225	1.10624	1.01169	1.02403	1.00995	1.04823	1.00317	1.00813	1.089	1.07783	1.0248	1.05144	0.99575	1.05934	1.02727	1.04818	0.98717	1.04175	0.96292	1.0215	0.99906	0.98391	1.00062	1.01213	0.96559	1.00194	0.99826	0.99985	1.11032	1.01249	1.12198	1.11208	1.00312	1.01421	1.07454	1.06613	1.06704	1.02409	0.97243	0.98416	1.09538	0.83415	1.07068	1.03283	1.21566	1.25775	1.11779		47
60.5
61
61.5
62
62.5
63
63.5
64
64.5
65
65.5
66
66.5
67
67.5
68
68.5
69
69.5
70	0.97575	0.91467	0.98337	1.0361	1.08004	0.98942	0.87333	1.09319	0.84926	1.07263	0.96827	1.06632	0.99239	1.04189	1.14646	0.96682	1.39827	0.94798	0.93437	1.31123	1.07308	1.07129	0.99683	1.01259	1.07165	1.00336	0.95989	0.99711	0.86241	0.94512	1.03876	0.95326	0.88545	0.93732	1.01519	0.95641	0.86931	0.8299	0.97726	0.83454	1.3882	1.08894	1.12747	0.89981	1.24098	0.58839	0.86452		47
70.5	0.92288	0.89537	1.00759	0.99119	1.05362	0.95907	0.97171	0.97646	1.00004	1.02003	1.05457	0.92545	0.93947	1.0668	1.12096	0.98507	1.17874	0.93742	1.04895	1.14896	1.04173	1.12665	1.01355	1.0259	1.06915	1.01618	0.9991	0.95142	0.98906	0.89674	0.94971	1.06597	0.83288	0.95916	0.96366	0.9406	0.89646	0.89446	0.93294	0.87395	1.1965	0.53481	1.27072	1.05135	0.94825	0.33254	0.75695		47
71	0.93913	0.9208	1.02134	0.92448	1.04156	0.99869	0.94458	0.99721	1.02301	1.01808	0.87195	1.0941	0.87666	1.00625	0.98578	0.87647	1.09039	0.96028	1.01121	0.99634	1.00252	0.95951	1.01998	0.99313	1.08337	1.00996	0.98988	0.9884	0.85017	0.86348	0.97616	1.05724	0.98602	0.98681	1.02345	0.98984	0.94171	0.88425	0.95835	1.01513	1.22496	0.96015	1.28528	0.81887	1.20434	0.94136	0.9966		47
71.5	0.9593	0.93774	1.02364	1.0163	1.02684	1.00722	0.77188	0.99965	1.03697	1.01052	0.92169	1.07661	0.92032	1.04048	1.19719	0.95335	1.11524	0.93138	0.84452	1.06053	1.05891	1.02831	0.99452	0.98581	1.05453	0.99271	0.98258	0.96941	0.90452	0.92895	1.08865	0.98708	0.93002	0.88907	0.98029	1.00114	1.00022	0.87777	1.02392	0.98139	1.31336	1.12453	1.26391	1.07182	1.13236	1.11352	1.17661		47
72	0.94187	0.93469	0.98375	0.89966	0.98652	1.04496	0.913	1.00078	1.02325	1.03075	0.91795	1.06209	0.95548	1.01273	1.12224	0.96728	1.07036	1.04995	0.96444	1.1438	0.94353	0.98137	1.03032	1.0202	1.04597	0.9819	0.97456	0.95794	0.94343	1.02528	1.01624	0.96951	0.91309	0.94056	1.09009	0.95574	0.93296	0.91357	1.01731	0.92613	1.15918	1.05758	0.93516	1.13015	1.27494	0.90337	0.89686		47
72.5	0.98599	0.99182	0.96319	0.98183	1.01786	1.08151	0.96864	1.04407	0.98468	0.99915	0.93651	1.02604	0.91112	0.98115	0.96791	1.00059	1.09229	0.95006	0.99435	1.01604	0.99001	0.95945	0.98437	1.01792	1.10514	0.96677	0.96691	0.96333	0.87743	0.95228	1.01848	1.03592	0.84934	0.90548	0.91845	0.94329	1.02454	0.89253	0.96621	0.94066	1.29154	0.93549	0.87164	0.88821	1.30266	1.13936	1.01999		47
73	0.93203	0.94634	0.98195	0.91299	1.05362	0.99544	1.0012	0.95454	0.98537	1.05752	0.94994	1.07557	0.8595	1.04398	1.10645	0.87622	1.10239	1.03389	1.01474	0.98005	1.0398	0.98467	0.99082	0.98997	1.05186	0.95173	0.98059	0.9807	0.98747	0.89021	0.99306	1.05919	0.94483	1.0251	0.99907	0.97337	0.91755	0.88806	0.94827	0.93769	1.28867	0.66984	0.90995	0.98314	1.05421	0.92103	1.17544		47
73.5	0.95787	0.98641	0.98238	0.96154	1.04299	1.03476	1.0901	1.06409	1.00437	1.04477	0.96855	0.98884	0.91734	1.03236	1.00817	0.94869	1.12332	0.90737	1.06032	0.98012	0.98682	0.95325	1.0817	1.01755	1.05978	0.95583	0.9774	0.98977	1.01281	0.93132	1.0289	0.94311	1.01105	0.90191	0.98958	0.98201	0.92556	0.84447	0.93204	0.9968	1.08662	0.95999	1.23379	1.08988	0.92576	0.83838	1.1387		47
74	0.94583	0.99501	1.03098	0.95925	0.96363	0.98829	0.95598	1.09165	0.98166	1.01405	1.03267	1.10868	0.99949	1.02693	1.087	0.94623	0.8612	1.0688	1.0151	1.04414	1.00163	0.88716	1.04701	0.99252	1.02762	0.94779	0.98904	0.98846	0.8938	0.97464	0.98187	0.99365	1.03864	0.95302	1.00179	0.94733	0.90238	1.05125	0.94632	0.90887	0.971	0.74597	1.36213	0.96429	1.13715	0.6665	0.96621		47
74.5	0.98733	0.95617	1.00764	1.00141	1.02401	1.03942	0.98946	1.05504	1.00818	1.03301	1.04616	1.00928	0.96812	1.03218	1.08056	1.03905	0.88796	1.03101	1.02939	0.96073	1.05093	1.11496	1.05601	1.01451	1.0489	1.01721	0.95863	0.96676	0.95806	0.94964	1.0184	0.98587	0.93699	0.90812	1.00147	0.94115	0.95652	0.90753	0.98836	0.99422	1.18701	1.04763	0.83948	1.33724	1.35957	0.7234	1.26691		47
75	1.03805	0.98489	1.01453	1.04605	1.0265	1.03473	0.97807	1.00788	1.01272	1.03263	1.01034	1.04224	0.96929	1.04916	1.01415	0.98492	0.83243	1.04369	0.97135	0.98885	1.02049	0.86597	0.98789	1.0034	1.08249	0.98581	1.00002	0.95772	0.99653	0.91054	0.96824	0.85138	0.98872	1.01838	0.9844	0.95109	0.94723	0.8886	0.9909	0.92815	0.93124	1.12534	1.33106	0.80334	1.49604	0.88481	0.99981		47
75.5	0.94739	1.02915	1.03593	0.92479	1.02141	1.04416	1.15217	1.04097	0.95291	1.05667	0.94262	1.02398	0.92687	1.05538	1.10606	1.00224	1.14043	0.97047	0.9836	1.03817	1.13057	0.9379	0.98754	1.00285	1.04739	0.98259	0.9941	0.98325	0.97851	1.01937	0.98869	0.99064	0.94289	0.92646	0.93989	0.9085	1.00197	0.89432	0.97307	0.96746	0.90362	1.62114	0.93664	1.12155	1.02043	1.23239	0.9271		47
76	0.96972	1.04697	1.0738	0.99021	1.05072	0.9924	1.00432	0.99757	0.8981	0.98416	0.96716	0.95348	0.96012	1.00464	1.06301	0.96612	1.19805	1.00439	0.97411	1.00547	0.86144	1.22929	0.9688	1.008	1.02209	0.98548	0.99124	1.01369	1.01155	0.96794	0.93291	0.92989	0.97863	1.00239	0.96713	0.97644	0.98287	0.92973	1.01488	0.9931	0.97283	1.08037	1.17432	1.32002	1.54849	0.87874	1.23249		47
76.5	1.01821	1.01744	1.04594	0.95531	0.97839	1.05897	1.09495	0.97075	1.00832	0.9459	0.97431	0.9774	0.94098	1.00546	1.00373	0.94288	1.16208	1.00484	1.09371	1.04505	0.94234	1.07519	0.96935	0.99238	1.05859	1.00667	1.01636	1.02079	0.96086	0.97216	0.83998	1.03066	0.98465	0.90516	0.99859	0.9818	1.00369	0.89781	1.03836	0.94412	0.98453	1.11081	0.81918	1.00335	1.17726	0.73577	1.17703		47
77	0.97429	0.88419	1.05585	1.04908	1.00791	1.10259	1.06111	0.97079	0.93628	1.04724	0.96562	0.85127	1.03471	1.04913	1.12845	0.98433	1.06816	1.0225	0.97935	1.01273	1.17989	0.91609	0.91422	1.00482	1.00683	1.01466	0.99339	1.00606	1.03926	0.99002	0.94138	1.00448	1.0707	0.96502	1.04089	1.01569	0.92588	0.83695	0.98919	0.90731	1.10023	0.81855	0.95249	0.62426	1.23259	1.00196	0.99512		47
77.5	0.93117	1.0137	1.01897	0.99648	0.94213	1.01824	0.93328	1.02161	1.11553	0.96775	0.95706	0.94631	1.03673	1.00853	0.95859	1.00338	0.90907	0.99391	0.98965	0.91589	0.97704	1.03185	1.0152	1.00436	0.98205	1.03697	1.01554	0.99534	1.04911	0.99184	0.98208	1.04626	0.94488	0.94568	0.97484	1.04143	1.04199	0.89783	1.00625	0.95977	0.98649	0.80535	1.12955	1.01059	0.8338	1.13125	1.05346		47
78	1.05689	1.04624	0.97298	0.97314	1.00434	1.05015	1.04823	1.03492	0.99956	1.04297	0.97084	1.08372	0.9517	1.02327	1.01914	1.03044	0.89352	1.02454	1.04229	1.02911	0.98666	1.09546	0.93274	0.98659	0.98107	1.01675	1.00557	1.02339	0.9605	0.9617	1.05508	0.99645	0.90949	0.94986	1.02464	0.97136	0.94262	0.85262	1.01543	0.96958	1.11941	1.19238	0.87721	0.76432	1.0197	0.85967	1.08996		47
78.5	1.01837	0.9258	1.00946	1.0208	0.99641	0.98982	1.04605	0.9489	0.91553	1.0001	1.06386	1.0108	1.06456	1.00155	0.99524	0.94582	0.86395	0.97814	0.94698	1.02943	1.04156	0.92509	1.04476	1.01259	1.01951	0.99313	0.99979	1.004	0.94106	0.95448	0.99782	1.00046	0.92128	0.93594	1.00754	1.01209	0.97761	0.86688	0.96391	0.97084	1.14945	0.82618	1.06517	1.35434	1.04216	0.88903	1.01222		47
79	1.0106	1.0313	1.01563	1.02661	1.07415	0.95882	0.98947	1.01161	0.98641	1.00621	1.02527	0.9762	0.96404	0.98369	1.04406	1.0374	1.3505	1.02045	1.03812	1.0426	1.01177	0.96463	1.02432	1.01349	1.03441	0.97018	0.99614	0.9943	1.02418	0.96945	0.93169	0.97287	1.0313	0.96899	0.92253	0.91337	0.98215	0.88009	0.99471	0.96265	0.76169	1.19312	0.9451	0.88777	1.12136	1.13707	0.86139		47
79.5	1.07491	1.03117	1.02651	1.01626	1.02183	1.00283	1.05219	1.00334	0.91635	1.0054	0.97306	1.11217	1.08196	1.06856	0.91341	0.97164	0.99807	0.91886	1.08255	1.04469	1.12188	1.28546	1.10649	1.00047	1.0161	1.04167	1.02215	1.05848	1.09021	0.96711	0.98456	1.02541	0.82768	1.04835	0.98749	1.0223	0.92486	0.86619	0.99402	0.89076	0.85845	0.5855	0.99378	0.72334	1.27801	1.17883	0.82469		47
80	1.32213	1.30227	1.4004	1.32722	1.30309	1.33339	1.44627	1.31958	1.36171	1.29913	1.43681	1.49097	1.48194	1.41353	1.398	1.33722	1.65958	1.32991	1.41092	1.40414	1.30144	1.2575	1.27413	1.26821	1.26384	1.33727	1.30529	1.3579	1.2836	1.27567	1.29495	1.27219	1.27906	1.2458	1.29268	1.26067	1.25709	1.248	1.23765	1.23945	0.97982	0.9808	0.86716	1.02869	0.66953	0.85753	0.79216		47
80.5	1.5133	1.50997	1.65796	1.56402	1.59977	1.58238	1.71629	1.60421	1.58952	1.56518	1.71932	1.82292	1.73911	1.72621	1.78508	1.6586	2.04859	1.55411	1.6805	1.74734	1.62586	1.62973	1.50831	1.53416	1.52332	1.60218	1.56588	1.62591	1.52742	1.52316	1.53173	1.53842	1.54239	1.50055	1.54209	1.53232	1.52359	1.48256	2.19346	2.33567	1.32035	1.30888	1.13697	1.33973	1.34014	0.93755	1.02548		47
81	1.74246	1.78478	1.78677	1.77344	1.74858	1.77129	1.81639	1.7749	1.75209	1.75777	1.76277	1.75687	1.74901	1.77558	1.75625	1.74327	1.81192	1.76998	1.74492	1.7497	1.74171	1.75926	1.75715	1.75886	1.7463	1.79908	1.78381	1.83242	1.75096	1.77188	1.77582	1.75442	1.74966	1.77756	1.75743	1.75793	1.75912	1.74687	2.93979	3.03351	1.47911	1.47251	1.77191	1.60568	1.50028	1.44005	1.45123		47
81.5	1.99058	1.99074	2.03262	1.95023	2.01874	2.03471	2.05116	2.01628	2.01148	1.99648	2.03996	2.12229	2.02711	2.03475	2.03828	1.99033	2.12903	1.95572	2.02873	2.03584	1.95047	2.17684	2.26705	1.9725	1.9756	2.03254	2.0013	2.03544	1.98094	1.98279	1.99981	1.98743	2.01127	1.96585	1.97199	1.99507	2.01147	1.97135	3.29083	3.31058	1.78405	1.99954	3.19211	2.55624	2.08548	2.00698	1.66492		47
82	2.18881	2.23681	2.46439	2.28269	2.29925	2.24947	2.55602	2.31358	2.38516	2.24101	2.49686	2.64646	2.64345	2.52768	2.69378	2.37405	3.11897	2.28421	2.39744	2.55138	2.33912	2.5419	2.5881	2.18633	2.19946	2.25825	2.22884	2.27742	2.22383	2.23667	2.20212	2.19714	2.17811	2.19768	2.18973	2.21718	2.20797	2.19517	3.53236	3.57819	2.19281	2.91709	2.9507	3.62669	2.71529	2.2019	2.06923		47
82.5	2.53558	2.57619	2.73843	2.49021	2.63121	2.58132	2.78276	2.61716	2.63808	2.47895	2.74405	2.93901	2.93282	2.71903	2.77329	2.61886	3.1251	2.55202	2.7217	2.75531	2.591	2.86702	2.79839	2.4595	2.50406	2.49949	2.51037	2.52659	2.52623	2.5539	2.44247	2.41546	2.46831	2.40646	2.36433	2.44324	2.45263	2.46082	3.75391	3.80911	3.28764	4.38749	3.73072	6.05894	4.70607	4.44516	3.47598		47
83	2.86647	2.91408	3.10355	2.8216	3.02077	2.87206	2.97223	2.92562	3.00701	2.84138	3.00281	3.25747	3.22467	3.01869	3.01368	3.01433	3.38882	2.89736	3.02654	2.9195	2.85721	2.90731	2.99698	2.83807	2.88221	2.84963	2.90625	2.89443	2.83228	2.86033	2.70938	2.70925	2.75099	2.68028	2.62784	2.78362	2.73837	2.73033	3.91864	3.97584	3.83464	5.57036	3.75553	7.66575	5.92209	5.27119	3.71265		47
83.5	3.08958	3.15628	3.33147	3.1386	3.35418	3.193	3.30645	3.19807	3.33497	3.14786	3.24275	3.57484	3.56863	3.28747	3.29029	3.33689	3.64718	3.15482	3.26483	3.19429	3.15748	3.1174	3.14212	3.17563	3.25356	3.15064	3.23679	3.21186	3.18402	3.25542	2.98678	3.06125	3.13874	3.02019	2.92793	3.15701	3.04187	3.05509	4.05904	4.15637	4.09647	6.19139	4.26383	8.02409	6.33832	5.93118	4.27873		47
84	3.31825	3.37213	3.60188	3.37099	3.55472	3.45613	3.56247	3.47084	3.65657	3.35655	3.43981	3.84849	3.86476	3.50687	3.5679	3.56939	3.72216	3.37045	3.53885	3.36941	3.38405	3.22676	3.26904	3.52029	3.60865	3.44945	3.60907	3.53551	3.52487	3.5995	3.27964	3.33751	3.37865	3.31148	3.24537	3.46399	3.30056	3.46499	4.22215	4.27577	3.95454	5.71611	4.09177	7.3552	5.65339	5.11677	4.02083		47
84.5	3.4494	3.52717	3.75931	3.50851	3.74941	3.60823	3.75254	3.66803	3.85598	3.55331	3.66543	4.12128	4.09644	3.70956	3.76509	3.76139	3.92234	3.54452	3.75727	3.56402	3.57612	3.35341	3.38326	3.86572	3.98327	3.7607	3.96297	3.84538	3.77016	3.79535	3.48812	3.53324	3.71488	3.62303	3.45337	3.79039	3.60552	3.71425	4.27267	4.3245	4.2896	6.40798	4.32379	8.00481	6.50116	5.77081	4.26847		47
85	3.54608	3.63187	3.90727	3.62963	3.89075	3.77995	3.88994	3.81966	4.01694	3.71016	3.81607	4.16333	4.21787	3.83342	3.84597	3.90578	4.01463	3.70722	3.89685	3.6803	3.64687	3.51188	3.49601	4.10821	4.22916	3.97659	4.20317	4.04543	4.0512	4.13241	3.75619	3.76629	3.97587	3.84198	3.69865	4.08707	3.84771	4.03161	4.32114	4.39632	4.32007	6.51678	4.50686	8.14222	6.72335	5.9663	4.42757		47
85.5	3.66606	3.76861	4.02951	3.73254	4.01328	3.84435	4.00723	3.94535	4.11659	3.7917	3.90352	4.36215	4.37317	3.96643	3.99724	4.04549	4.17349	3.80657	4.00899	3.80043	3.79537	3.48464	3.53935	4.23203	4.3534	4.08615	4.30291	4.19292	4.27352	4.32866	3.90323	3.99234	4.18938	4.07202	3.96148	4.34781	4.0451	4.2551	4.39762	4.46198	4.40318	6.43921	4.65331	8.19641	6.61224	5.59898	4.52401		47
86	3.71941	3.79225	4.07389	3.80472	4.09651	3.9537	4.07923	4.06621	4.16357	3.86904	3.97598	4.44513	4.42752	4.03738	4.06397	4.15574	4.22085	3.9032	4.0831	3.88222	3.89756	3.51393	3.60732	4.2897	4.38822	4.14864	4.37051	4.24495	4.43849	4.58616	4.07553	4.20451	4.36627	4.27699	4.14929	4.53241	4.19944	4.49265	4.45915	4.5511	4.41292	6.50216	4.4975	8.10589	6.45897	5.59718	4.44522		47
86.5	3.76166	3.83815	4.16384	3.87887	4.13586	4.01802	4.09954	4.07083	4.28041	3.92647	4.01865	4.48235	4.41527	4.10124	4.10286	4.18715	4.17943	3.88621	4.14234	3.94279	3.9315	3.6243	3.66467	4.30763	4.39753	4.15787	4.39328	4.25249	4.54344	4.62532	4.17	4.28673	4.4554	4.44068	4.27953	4.75461	4.31737	4.61053	4.46425	4.53963	4.48255	6.6469	4.62852	8.1636	6.39604	5.43754	4.43508		47
87	3.78467	3.85502	4.1515	3.87195	4.16385	3.99552	4.06944	4.09226	4.31519	3.95915	4.02272	4.48285	4.46676	4.09868	4.14689	4.21674	4.27094	3.94623	4.14275	3.91594	3.94636	3.60314	3.6631	4.30979	4.37852	4.1999	4.40061	4.2627	4.72363	4.77109	4.27028	4.34338	4.57792	4.5522	4.36938	4.8426	4.43862	4.7476	4.44644	4.50893	4.56511	6.34008	4.62574	8.24659	6.37096	5.69159	4.60883		47
87.5	3.80244	3.83608	4.13741	3.91564	4.16723	3.98216	4.09918	4.09456	4.29044	3.9695	4.01933	4.48748	4.52337	4.0936	4.1366	4.20788	4.18262	3.93203	4.10871	3.92158	3.92915	3.56426	3.64075	4.30144	4.35595	4.25929	4.42657	4.2591	4.72167	4.82134	4.32213	4.46509	4.65835	4.62847	4.46701	4.98064	4.47651	4.82055	4.46038	4.48772	4.59579	6.60174	4.56449	8.09647	6.75002	5.52498	4.58196		47
88	3.80529	3.84109	4.11454	3.84681	4.17923	4.00502	4.03334	4.04366	4.24438	3.95376	4.00431	4.48444	4.45664	4.1024	4.17029	4.17635	4.27822	3.98307	4.12818	3.94595	3.93315	3.51821	3.63894	4.30377	4.35112	4.26591	4.44556	4.2668	4.78477	4.86924	4.34661	4.46587	4.67298	4.71293	4.54774	5.04819	4.50945	4.92422	4.42732	4.47062	4.61059	6.3374	4.78149	7.87278	6.6227	5.43822	4.49255		47
88.5	3.79299	3.80481	4.11012	3.83504	4.11563	3.94396	4.0419	4.05114	4.21953	3.92157	4.00533	4.45337	4.42064	4.08346	4.11234	4.12123	4.3761	3.95861	4.08715	3.92116	3.92816	3.45576	3.66281	4.31565	4.3541	4.30473	4.46829	4.2662	4.83146	4.87999	4.41769	4.5329	4.80563	4.77719	4.57404	5.10672	4.55315	4.93337	4.38826	4.44711	4.60038	6.57674	4.66606	8.19261	6.72884	5.66066	4.57049		47
89	3.78613	3.77965	4.07039	3.86275	4.13199	3.97554	4.06474	4.03866	4.22444	3.87968	3.9779	4.36976	4.43973	4.07436	4.12093	4.14614	4.24804	3.93343	4.09113	3.87796	3.87113	3.56803	3.63968	4.3506	4.35199	4.29814	4.5028	4.27628	4.80656	4.87592	4.44227	4.52976	4.83069	4.76726	4.64687	5.14258	4.53956	5.02859	4.39272	4.39614	4.64474	6.51518	4.49523	8.22823	6.50417	5.61239	4.50925		47
89.5	3.77398	3.78448	4.05894	3.81225	4.1019	3.93177	3.93563	4.0301	4.1474	3.91245	3.96162	4.33196	4.38023	4.03595	4.05073	4.14533	4.15514	3.90153	4.04518	3.87949	3.91211	3.59725	3.60933	4.37162	4.37584	4.32959	4.50405	4.29926	4.82913	4.9535	4.47362	4.61478	4.88744	4.84301	4.7092	5.19501	4.62836	5.03855	4.33191	4.4079	4.7574	6.35801	4.72731	8.02401	6.61213	5.75962	4.52152		47
90	3.7319	3.76473	4.03419	3.82273	4.07419	3.87559	3.98047	3.99766	4.09628	3.86307	3.90208	4.33433	4.40163	4.0348	4.11031	4.08671	4.1342	3.85817	4.03656	3.83321	3.88022	3.6286	3.63429	4.37759	4.38447	4.33326	4.50881	4.28956	4.88674	4.97161	4.48622	4.58041	4.90946	4.85207	4.7008	5.21349	4.65329	5.06898	4.32474	4.39414	4.57614	6.54667	4.64308	8.25774	6.63992	5.6877	4.54066		47
rerative F	AM251
sec	bouton #1	#2	#3	#4	#5	#6	#7	#8	#9	#10	#11	#12	#13	#14	#15	#16	#17	#18	#19	#20	#21	#22	#23	#24	#25	#26	#27	#28	#29	#30	#31	#32	#33	#34	#35	#36	#37	#38	#39	#40	#41	#42	#43	#44	#45	#46	#47	#48	#49
-9.5	0.89352	0.92441	0.98954	0.93687	1.01327	0.95139	0.96199	1.00011	0.88978	0.90954	0.93579	0.98265	1.0018	1.04144	1.00241	0.94876	0.99745	0.99472	0.968	0.9961	1.0093	0.96045	1.04031	1.00473	1.00837	0.95034	0.98083	0.99483	0.99965	0.97627	0.95432	0.96406	0.86962	1.02489	0.93058	0.98167	1.00533	1.03295	1.00014	0.9505	0.97513	1.01008	0.97169	0.97412	1.01705	0.98601	0.99435	0.98992	0.93921
-9	0.90258	0.99183	0.94463	0.93884	0.96186	0.90599	0.9648	1.00377	0.93411	0.97493	0.91979	1.01384	1.02692	1.01464	1.03796	0.98352	0.98868	0.99284	1.0072	1.01549	0.97952	0.97546	1.05487	0.98315	0.99014	0.95651	1.05956	0.98166	0.98657	0.96193	0.99166	0.99025	0.94266	1.00807	0.96557	0.94926	1.02165	1.02546	1.0615	0.99812	1.00733	0.97363	0.97397	1.04332	0.99311	0.99547	1.08922	0.99551	0.91935
-8.5	0.95026	0.97716	1.02231	1.03356	1.0397	0.99257	0.97529	0.91655	0.9496	0.93092	1.05123	1.0512	0.99332	0.99004	1.00091	0.99026	1.00795	0.99719	0.91721	1.02464	0.98587	0.95706	1.0167	1.02245	0.96599	0.97341	0.97417	0.99783	1.04698	0.97981	1.00824	1.00929	0.91011	0.992	1.02128	0.98929	0.98776	0.97779	1.07896	0.99363	1.01023	1.03281	0.9913	0.99021	1.03296	1.01848	1.07432	0.98573	0.91277
-8	0.98542	0.91235	0.95209	0.90592	0.99575	0.97615	0.95866	1.02123	0.99336	0.99239	0.96133	1.04554	1.00903	0.98578	0.99472	0.99628	1.00989	1.03071	0.9704	1.00564	0.96523	0.94467	1.03054	1.01387	1.04317	0.98764	1.00931	1.04327	1.00722	0.97101	1.00039	0.96336	0.88791	0.99681	1.0131	0.97475	1.01153	1.04024	1.01352	1.01981	0.97948	0.99602	0.97316	0.98936	0.98973	0.9748	1.02263	1.00409	0.97581
-7.5	0.97543	0.94355	0.93882	0.99014	0.94459	0.93364	0.95766	0.97366	0.96448	1.0083	0.97559	1.01323	1.0082	1.00517	1.00675	0.91961	0.92502	1.0315	0.9747	1.0355	0.9751	0.98421	1.02481	0.97282	0.97334	0.98238	0.97168	0.99268	0.99984	0.97857	0.97953	1.06457	0.93684	0.9165	1.02086	0.95921	1.01069	1.01677	1.0693	0.97423	1.02096	0.99405	0.99185	1.01276	0.96933	0.99995	1.03805	0.99621	0.94584
-7	0.94359	0.97531	0.9828	0.93611	1.00623	1.01062	0.96278	1.00557	0.85329	1.00294	1.02401	1.00992	1.01952	1.03027	1.03859	1.015	1.00024	1.05372	1.00585	1.00289	0.95394	0.95312	1.04525	1.01444	0.93031	0.94392	0.96277	1.05025	0.99185	0.97491	0.97665	1.04337	0.93907	0.9789	1.0047	0.98154	1.00189	1.00436	1.00552	0.97397	0.98721	1.03876	0.96935	1.03194	1.02582	1.01963	1.01579	1.00262	0.96695
-6.5	1.01356	0.97684	1.03029	1.01676	0.99078	0.92311	0.93747	0.9537	0.96634	0.90452	0.99533	0.98647	1.04305	1.01125	1.05495	0.9955	0.96917	1.00823	0.97887	1.063	0.9891	0.97045	0.9842	1.02375	0.99624	0.95833	1.07065	1.02543	1.01975	0.95767	1.01262	1.02311	0.96116	0.98899	1.02856	0.94616	1.03025	1.00367	0.94007	1.05274	0.98944	0.95247	0.9653	0.9906	1.01611	0.98063	1.02039	0.94863	0.96673
-6	0.95269	0.99729	1.02234	0.97616	1.06146	0.99562	0.96242	1.01296	0.93228	0.97848	1.01958	0.99531	1.00882	1.06252	0.96629	0.99519	0.97276	1.02988	0.97105	1.03453	1.00561	0.98169	1.01188	0.95223	0.97354	0.96844	0.93946	1.02142	1.03536	0.97131	1.00419	1.03563	0.91176	1.02344	1.00564	1.00701	0.97651	1.02356	1.0255	1.01414	1.01613	0.99309	1.04498	1.01408	1.03716	0.96814	1.0221	0.97681	0.9622
-5.5	0.97447	0.99017	0.96572	0.98433	1.00481	0.98876	0.99644	0.92811	0.95504	0.97347	1.05727	0.97992	1.03388	1.03046	1.01012	0.99205	0.99669	1.02371	0.97887	1.0455	0.99851	0.97322	1.00249	0.98922	0.94679	0.99025	0.94536	1.01115	0.9738	0.98926	0.9568	1.04573	0.9954	1.01066	1.01656	0.92301	1.01482	0.99379	1.00729	1.03297	1.00647	1.01805	1.00435	0.96951	1.02742	1.01354	1.06939	0.9539	0.95269
-5	0.95873	0.9762	0.99381	1.03121	0.9665	0.92725	0.996	0.97927	0.9835	0.98516	0.98414	0.97368	1.00363	0.95837	1.01498	1.03923	0.97353	0.99982	0.91926	1.02248	0.99124	0.99647	1.02541	1.007	0.93587	1.01074	0.98912	0.99959	0.99776	0.96989	0.98375	1.06795	0.95122	0.99167	1.00131	0.9664	1.00317	1.01832	1.02246	1.07572	0.9865	0.97682	1.00508	1.0699	0.99022	1.00172	1.09444	0.98152	1.02542
-4.5	0.96868	1.02915	0.97399	1.02588	0.99568	0.9787	0.9452	1.00185	0.90483	0.99563	1.0352	0.99742	0.97488	1.00813	1.05404	1.00154	0.96378	1.02398	1.01078	0.99613	0.94491	1.0054	0.99523	1.0109	0.96534	0.93957	1.02529	1.04406	1.00499	0.98991	0.99384	1.00018	0.97302	1.00687	1.03977	0.96805	0.99983	0.99213	0.96255	1.06776	1.02271	0.98807	0.98853	1.00647	0.98047	0.99231	1.04293	0.95432	0.98149
-4	0.96897	0.9708	1.08028	1.05203	0.99805	1.01505	0.92744	0.99726	0.97572	0.99008	0.98024	1.0386	1.04628	0.98941	1.0492	0.96686	0.90897	1.02606	0.95602	1.0023	0.99468	0.97559	1.02624	1.02606	0.94675	0.94162	1.02415	1.01463	0.99566	0.98647	0.98273	1.00954	0.95894	0.88941	0.98299	0.96628	1.04812	1.00409	1.01819	0.97915	0.97918	0.9572	1.01396	1.01335	1.01484	0.91791	1.11249	0.98215	0.95241
-3.5	0.96683	0.98672	0.94712	1.04261	1.09579	0.9788	0.98068	1.03033	0.93897	1.00113	0.9673	0.96732	0.94486	1.02754	1.01618	1.01126	0.9501	0.98912	1.04056	1.00441	0.98836	0.95226	0.97887	1.04729	0.98543	0.99338	0.98362	0.99154	0.98553	1.00272	0.98355	0.99827	1.00477	0.99831	1.01588	0.97485	1.05376	1.00775	1.0165	1.00649	1.01992	0.98227	0.97784	1.02218	1.0783	1.00723	1.04717	0.96671	0.96249
-3	0.96715	0.93103	0.95427	1.00562	0.99032	1.00823	0.99026	0.99522	0.91847	0.95585	0.95561	0.99882	1.02687	1.00989	1.04467	0.98235	1.01072	1.00805	0.98591	0.98441	0.99818	0.96826	1.03814	1.02578	1.04862	0.9704	1.00287	1.02239	0.97115	0.99242	1.02271	0.97068	0.93587	0.93809	0.99824	1.00689	1.01348	1.0743	0.99569	0.9872	0.99084	0.99026	1.02062	1.04898	1.03134	0.98536	1.00636	1.04473	1.02898
-2.5	1.00831	0.98595	1.06089	1.08333	0.95623	0.99572	0.97032	0.96706	0.98825	0.98625	0.97085	1.02975	1.00382	1.02253	1.0354	1.08048	1.00319	0.96675	1.0112	1.01635	0.96384	0.98124	1.00001	1.01139	0.99598	0.95628	0.97686	1.05234	0.99697	0.98739	1.01669	1.04227	0.94117	0.90336	1.0458	0.96995	1.0168	1.01818	1.02476	0.97794	1.01994	0.99453	0.9726	0.94851	1.01187	0.98976	1.03197	0.99438	0.95169
-2	0.94932	1.03305	0.97182	0.9139	0.98338	1.00134	1.00189	0.97721	0.99453	0.99546	0.94245	1.00834	0.98078	0.9676	0.94941	0.96017	0.98126	1.01399	0.97162	0.97664	0.98511	1.01806	0.99239	0.98152	0.97572	0.98362	0.94463	1.01213	1.02016	0.99444	0.99934	1.01153	1.03321	1.00262	0.99338	0.96085	0.99404	1.01101	1.03725	0.99366	0.98126	0.98702	0.9997	0.97485	0.99934	1.03881	0.99412	0.97128	1.0212
-1.5	0.98909	0.98037	0.97098	1.05502	1.00944	0.97939	0.98068	1.02696	1.02913	0.97202	0.99894	1.03078	0.99018	1.00074	1.03221	1.04494	1.0173	1.00397	0.99397	1.0018	1.00662	0.972	1.01127	0.98874	0.9857	0.96888	0.99105	1.00049	0.99298	1.00444	1.0234	0.99675	0.96706	1.03653	1.01426	1.01181	0.99489	0.97617	0.97648	1.00429	1.01217	1.01461	0.9849	0.99136	0.98607	1.0069	1.00781	1.00973	1.01432
-1	1.01758	0.98903	1.01242	1.02381	0.98841	0.96456	1.0074	0.96715	0.98592	1.00818	0.99625	0.98571	1.01916	1.01641	0.95941	0.95011	0.96351	1.00552	1.03522	1.0293	1.00725	0.9986	1.00966	0.99933	1.02275	1.00867	1.01668	0.99284	1.00535	1.00909	0.98451	0.99437	1.01309	1.02022	0.98442	0.995	1.01513	0.98486	0.98954	0.98042	1.03525	1.01636	0.99906	0.98499	1.01991	0.99797	1.01617	1.01214	0.99773
-0.5	1.03959	0.99313	1.04036	1.00285	1.01435	1.05029	1.00561	1.02426	0.98599	1.01992	1.05795	0.97075	1.00547	1.01083	1.05455	1.04036	1.03351	0.9721	0.99477	0.98784	0.9966	1.00692	0.98226	1.02599	1.01141	1.03442	1.04321	0.99012	0.97709	0.98761	0.98834	0.99293	0.98221	0.9362	1.00353	1.02793	0.99152	1.02355	0.99231	1.01721	0.9669	0.97759	1.01193	1.04439	0.99027	0.95189	0.97748	1.00243	0.96233
0	0.98245	0.95478	1.05773	0.98751	0.94837	1.06503	0.97344	0.97197	0.9041	1.05314	1.00096	1.01175	1.01637	1.0409	1.03661	1.06525	0.95094	0.99303	1.01672	1.01778	1.01294	0.94879	1.0274	1.0049	0.97164	0.99266	1.03854	0.99365	0.97689	0.99575	0.99396	1.01273	1.07596	0.96603	0.96621	0.99601	1.01263	1.01616	1.06914	1.00496	1.0345	0.97226	1.00869	0.95383	1.00178	0.9348	1.04328	0.95704	1.00237
0.5	1.03925	0.97026	0.9943	0.99621	1.02467	0.96384	0.98108	1.02411	0.99388	0.96303	0.97951	1.02059	1.00245	1.03112	1.00949	1.02065	0.9742	1.00371	0.97706	1.01271	0.93045	0.97686	1.03268	0.98142	0.98975	0.97746	0.97611	0.98601	0.98579	0.98872	0.98309	1.02422	1.04092	0.97734	1.01103	0.99574	0.94872	1.00553	0.99111	0.99629	0.98075	1.02621	1.00882	1.04063	1.02239	0.98034	1.05753	0.9313	1.01274
1	0.97136	0.9517	1.01155	1.02825	1.04686	1.03334	1.01143	0.99963	0.96394	0.96743	1.01232	0.95626	1.02069	1.00394	1.00776	1.03081	0.98257	0.9723	0.95587	1.05948	0.96292	0.95081	0.99586	0.99587	0.97358	0.95361	0.96348	1.00974	1.00673	0.9962	0.9841	0.97043	1.00168	0.99494	0.95223	0.97046	1.06943	1.0101	1.01088	1.03328	1.02852	0.99275	0.98579	0.97083	0.99985	0.98708	1.00489	1.00586	1.04961
1.5	1.03494	0.95114	0.92605	1.02358	1.04832	1.02171	1.01679	1.02586	0.97874	0.9942	1.03364	0.96741	0.98236	0.98654	1.00713	0.98058	0.95348	0.98028	0.93252	1.02133	0.97135	1.00055	0.97357	1.01112	0.97343	1.02149	0.97406	0.99803	1.02561	0.99685	0.96994	1.03279	1.02155	1.02319	1.00404	0.94074	0.98653	1.05895	0.98071	0.99686	0.99324	1.03062	1.06064	1.02711	0.95861	0.97926	1.0207	0.967	0.97529
2	0.99959	1.01855	1.06373	1.05382	1.05871	1.02817	0.97351	0.95856	0.89723	0.99314	1.02663	0.97017	1.00823	1.02704	0.99799	0.96678	0.97532	1.02649	0.96591	1.01408	1.00767	0.92941	0.96385	0.99251	0.97169	0.97251	1.02859	1.03854	0.97728	0.9994	0.98841	1.03086	1.01438	0.9352	0.98989	0.97176	1.04321	1.07722	1.01915	0.97207	0.96479	1.04008	1.01734	0.9991	1.0312	0.99154	0.94279	1.01543	0.97306
2.5	0.93725	0.92956	0.95117	1.03894	1.04677	1.09112	0.96799	0.98654	1.02274	1.05314	1.00678	1.00137	0.97761	0.99546	0.98504	1.01734	0.96543	0.97562	1.02025	1.0605	0.98144	0.98132	1.02405	1.00607	0.96992	0.99835	1.02638	1.0142	1.00961	1.01721	0.97682	1.03021	1.01467	1.05392	0.99144	0.9974	0.99196	1.02018	0.94877	0.98678	1.01401	0.97032	0.94647	1.01107	0.96229	0.97414	0.93628	0.97527	1.05014
3	0.94983	1.02503	1.09281	0.99507	1.0228	0.97694	1.03635	1.02205	1.01312	0.99171	1.02286	0.99988	0.99315	1.05071	0.98521	1.0105	0.96815	0.94919	0.9173	1.03121	0.93394	0.97908	0.9897	1.00554	0.93486	0.95006	1.03408	1.02544	0.98267	0.98393	0.99356	1.02977	0.99837	1.02101	1.01923	1.01883	1.09927	1.04765	0.98384	0.97456	1.03517	0.98061	0.99642	1.04408	0.98096	0.95412	0.9793	0.95184	0.95961
3.5	0.95357	1.02276	0.88651	1.00106	1.02912	1.04633	0.96013	0.93654	0.95912	0.98617	0.99749	0.9939	1.01501	0.9386	0.99039	0.98734	0.98732	1.00298	0.9822	1.03204	0.96553	1.00033	1.00715	0.93652	0.96335	0.98708	0.98077	0.99941	0.99296	0.98989	0.98076	1.02775	1.06221	1.01594	1.00476	1.02618	0.99375	1.05348	1.0307	0.97652	1.01082	1.01808	1.01524	1.00325	1.05337	0.99456	1.011	0.95493	1.00619
4	0.9677	0.99189	0.9702	0.984	0.99518	0.98139	0.95324	1.00221	0.95315	0.96746	0.99182	0.97187	1.00804	0.99294	1.0029	0.94582	0.96818	0.96472	0.94253	0.98579	0.91461	0.97488	0.9743	0.95517	0.97524	0.99382	0.98074	0.98171	0.99102	0.98025	0.98951	1.0137	1.0049	0.92303	0.97358	1.00636	1.03066	1.03588	1.02073	1.00441	1.0515	0.98262	1.00331	1.05491	0.9598	0.99719	1.04777	0.99393	0.99749
4.5	0.93191	0.98592	1.05869	1.00033	0.9679	1.03554	0.97542	0.99027	0.97682	0.98733	1.09	0.95144	0.94435	0.97889	0.99351	0.99572	1.00498	0.96932	0.94228	0.98373	1.00176	0.97999	0.98686	1.03261	0.92003	0.94134	0.98597	1.01301	0.97008	1.00215	1.00124	1.00922	1.00116	0.96598	1.02098	1.01226	0.93221	1.03997	0.99113	1.0383	0.99167	0.99352	1.03325	1.07529	1.01922	0.93573	0.99933	0.99682	1.05629
5	0.98493	0.95287	0.98354	1.00666	1.00362	1.03839	0.97705	0.97016	1.02884	0.9591	1.00827	0.96511	0.95931	1.02815	1.03549	0.94008	0.98216	0.98703	0.96768	0.95948	0.99139	0.97961	0.97558	0.9554	1.04141	0.94141	1.0582	0.98133	0.98407	0.98061	0.97388	1.04615	0.99066	0.99697	1.02487	1.02143	0.92951	1.00755	0.9603	1.05233	1.02677	1.09076	1.0357	1.00222	1.03255	0.94511	0.98642	0.98713	1.03597
5.5	1.0029	0.89487	1.04817	1.10321	1.06988	1.04531	0.96919	0.97514	0.94585	1.00236	1.05075	0.99363	0.98153	1.02141	1.02876	1.00661	1.0051	1.03074	0.9906	0.9917	0.96046	0.9643	1.02054	1.0256	0.93356	0.92861	0.99755	0.99852	0.98598	0.99953	0.97508	1.0153	1.02149	1.02476	0.98045	1.02651	1.02341	1.05672	0.96823	1.08118	1.0711	1.02797	1.05319	1.04261	1.03749	1.00353	0.99785	0.9787	0.94351
6	1.00262	1.00335	1.02293	1.02461	0.98709	0.99457	0.94093	0.9743	0.92237	0.98937	1.0714	0.97932	0.97277	1.00777	0.96936	0.98097	0.98359	0.99128	0.94719	1.00774	0.95127	0.99419	1.02108	0.94981	1.01554	0.91286	1.05247	0.98606	1.00161	0.99458	0.93439	1.02128	1.02755	1.05113	1.01299	1.04836	0.97288	1.03793	0.98564	1.03789	1.01981	1.00344	1.03692	1.04599	1.01649	0.99509	0.96083	0.99386	0.98515
6.5	0.99215	1.03259	0.98173	0.98374	1.08554	1.10907	0.9407	1.00585	0.96065	1.02048	1.09539	0.97925	0.95102	1.02038	0.99682	0.98124	0.94209	0.97021	0.97637	0.9928	0.96932	0.96238	1.01763	0.98101	0.94318	0.94141	1.01445	1.00065	0.99906	0.99348	0.98717	1.04618	1.06662	1.01305	1.04129	0.99669	0.98946	1.05765	1.04611	1.01666	1.03452	1.04648	1.04789	1.06097	0.98962	0.96416	0.97535	0.95766	1.04218
7	0.94755	1.03015	0.95178	1.01336	0.95729	1.01084	0.95326	0.98391	0.94522	1.00237	1.07442	1.03739	1.01127	0.98314	1.00226	0.9525	0.96029	0.9775	0.92354	1.01296	0.98674	0.97642	1.03221	1.02494	0.97497	0.93853	1.0035	0.96305	1.00007	0.99394	0.97049	1.01932	1.05048	1.07096	1.06091	1.00081	1.00082	1.04991	0.97482	1.01139	1.05439	1.00126	1.0388	1.13873	1.01962	1.02415	0.99363	0.99595	1.02319
7.5	1.02571	0.9715	1.095	1.01398	1.04131	1.08709	0.95233	0.97715	0.98543	0.99073	1.11621	0.99471	1.03425	0.99925	1.02265	1.00832	0.96968	0.98225	0.96509	1.01389	0.95456	0.98605	1.00657	1.03122	0.98569	0.94485	0.9893	1.01909	0.98795	0.9949	0.97507	1.03944	1.00047	1.04708	1.07437	1.02797	1.01705	1.02447	0.98978	1.04259	1.0948	1.02276	1.02481	1.15845	1.06584	1.03942	1.03296	1.05381	0.99563
8	0.98803	0.9185	1.06554	1.03699	1.04153	1.0777	1.01335	1.01734	0.90757	1.01479	1.09455	0.9759	1.00524	1.04226	0.95938	1.00791	0.95763	0.96975	0.97954	1.04673	0.95148	0.97601	1.05353	1.00718	0.9662	0.91206	1.02435	0.98316	1.02861	1.00097	0.98683	1.03401	1.08863	1.07629	1.03824	1.05147	0.98537	1.06654	1.03584	1.06964	1.11413	1.02489	1.03374	1.0809	1.07207	1.01161	1.04772	0.98555	1.01555
8.5	1.02414	1.02299	1.03135	0.98669	1.00725	1.01603	0.95907	0.99412	0.99958	0.98871	1.09956	0.95826	1.03035	1.03851	1.03949	0.98453	0.98224	1.01389	0.93338	1.02827	0.95609	0.97668	0.99332	0.9814	0.97453	0.93091	0.97959	1.04329	1.03238	0.9842	0.98769	1.03124	1.04447	1.07416	1.02662	1.02394	0.9855	1.01573	0.98171	1.05114	1.07708	1.05101	1.07312	1.11681	1.06986	1.05061	0.99769	0.99606	1.05619
9	1.00295	0.99908	0.96015	0.99744	0.95774	1.05701	0.98175	1.00828	1.01679	1.01311	1.06389	1.0081	1.02129	1.00046	1.04182	0.97779	0.96008	1.00634	0.97447	1.04298	0.97523	0.94342	1.03384	1.00661	0.98424	0.94466	1.02996	1.00797	0.97085	0.98771	0.96619	1.00992	1.0514	1.07401	1.03266	0.99733	1.03558	1.05612	1.00488	1.10088	1.05911	1.02898	1.08528	1.11894	1.07806	1.0024	1.02696	0.94081	1.043
9.5	1.046	1.00401	1.03206	1.00418	1.02254	1.06163	1.00623	1.00984	0.96488	1.04853	1.06616	1.03856	0.97235	0.99035	1.08255	1.01906	0.99004	0.98554	1.01385	1.0795	0.93819	0.93811	1.06095	1.05389	0.94163	0.94036	1.01254	1.003	0.97793	0.99523	1.01127	0.97209	1.02635	1.02684	1.03594	1.03933	1.01879	1.08183	1.03771	1.05579	1.06549	1.06552	1.10942	1.12081	1.07265	1.00403	0.9718	0.98915	1.04576
10	1.00276	0.94518	1.08593	0.93469	1.01445	1.01696	0.97554	1.01382	0.99717	1.05845	1.0511	0.98733	1.07334	1.00273	1.02205	0.99612	0.96711	0.95589	0.97018	1.03948	0.98301	0.99027	1.06536	1.00266	0.99633	0.94529	1.06626	1.03744	1.03064	0.99201	0.97855	1.05332	1.04202	1.07771	1.0303	1.03889	1.04384	1.0611	1.01357	1.10476	1.10048	1.10477	1.1123	1.12966	1.1454	0.98593	1.10955	1.02656	0.99865
10.5	1.0406	1.06526	0.96605	1.08732	1.06184	0.96411	0.97702	1.02455	1.00854	1.08526	1.02359	0.98046	1.03632	1.05273	0.99302	0.96196	0.97512	0.98123	0.97945	1.08997	0.99224	0.99061	1.04174	0.97869	0.97093	0.9373	1.00994	1.00463	1.03107	1.00971	0.98058	1.08651	1.04429	1.12984	1.03798	1.05883	1.04343	1.03158	1.08189	1.10467	1.10993	1.05551	1.12882	1.14945	1.1076	1.0215	1.04218	1.05919	1.04059
11	1.04938	0.94678	1.09069	1.03169	1.06499	0.95858	0.94655	1.00577	0.95373	0.97455	1.08964	1.01531	1.0885	1.03001	1.01258	0.97618	0.98615	0.99337	1.02088	1.06215	0.97475	0.95282	1.0927	1.05643	0.99872	0.97428	0.94611	1.00214	1.00398	0.99113	1.01442	1.07026	1.03012	1.13826	1.00505	1.09905	1.06439	1.05217	1.07218	1.06387	1.04541	1.08589	1.08591	1.18081	1.07379	0.99209	1.05554	0.97962	1.10881
11.5	1.04081	1.00641	1.0855	0.99057	1.01867	1.03197	0.94207	1.00058	1.01264	1.01678	1.08722	1.0123	1.10495	1.0377	1.04336	0.94995	0.97816	1.02644	1.0052	1.03368	0.99291	0.97897	1.12662	1.05092	0.96872	0.96428	1.00656	0.97915	1.0071	0.97858	0.96524	1.0569	1.06318	1.03749	1.07308	1.06098	1.05676	1.05608	1.0765	1.12864	1.13235	1.06959	1.13757	1.18749	1.10084	0.99329	1.06818	1.01523	1.13017
12	1.07429	0.96746	1.10422	1.07659	1.01666	1.03819	1.00929	1.0577	1.01429	1.06096	1.07806	1.00182	1.12683	1.07173	1.04944	0.98572	1.00781	1.05758	1.00755	1.04923	0.97	1.00935	1.11734	1.00658	0.99935	0.97215	1.02824	0.97717	0.98333	0.99941	1.00625	1.0224	1.06384	0.9744	1.0591	1.04876	1.10021	1.09696	1.04134	1.13703	1.13708	1.06663	1.12301	1.18955	1.1111	1.04065	1.09694	1.01042	1.0294
12.5	1.03678	1.03661	1.06219	1.01201	1.02974	1.08923	0.94902	1.01024	0.94551	1.1006	1.05616	1.04011	1.08507	1.02264	1.10542	0.95259	1.00821	1.05422	1.02175	1.08883	0.96326	0.99321	1.0981	1.01506	1.03015	0.95245	0.98145	1.02786	1.00078	0.99833	1.0606	1.09394	1.00422	1.05671	1.06396	1.05878	1.0401	1.05386	1.07623	1.15096	1.14099	1.0968	1.16439	1.21928	1.1322	0.99651	1.07071	0.99466	1.06661
13	1.01696	0.98058	0.94262	1.01638	1.02326	1.02901	0.97636	1.03073	0.96937	1.01266	1.07438	0.99266	1.10874	1.01634	1.06311	0.96458	1.0138	1.02156	1.03815	1.08342	0.98817	0.9869	1.11576	1.0304	0.9838	0.95791	1.03204	0.99944	1.02539	0.99429	1.0366	1.09326	1.08182	1.0629	1.11488	1.05629	1.08345	1.11618	1.1066	1.07995	1.15411	1.07415	1.15091	1.22997	1.16254	1.00085	1.09665	0.99095	1.06582
13.5	0.94768	0.98067	1.05979	1.04343	1.06167	1.05948	0.9917	1.03787	1.01298	1.0703	1.12642	0.95293	1.06967	1.03924	1.04186	1.00801	1.00379	1.02288	0.97421	1.07445	0.92681	1.03741	1.15259	1.0283	0.97284	0.97962	0.99382	1.00615	1.00754	0.98873	1.05673	1.09376	0.99182	1.04505	1.07014	1.05294	1.09306	1.0817	1.07608	1.13621	1.14613	1.13266	1.14938	1.23952	1.17368	1.02285	1.04508	1.02821	1.12253
14	0.99992	0.95234	1.07802	1.05809	1.05203	1.10891	1.0037	1.10006	0.99005	1.04259	1.11212	0.95806	1.14366	1.04989	1.06243	1.00701	1.01606	1.05127	1.0173	1.071	0.97965	0.98646	1.15978	0.99288	0.97741	0.99156	0.99106	1.03227	1.00869	0.99261	1.05861	1.08285	1.04394	1.17173	1.10714	1.05297	1.09364	1.10086	1.05843	1.09459	1.14409	1.13937	1.12574	1.2303	1.15474	1.01913	1.11875	1.00927	1.06765
14.5	0.99902	1.02851	1.09924	1.07099	1.07466	1.00823	1.01846	1.02358	0.91794	1.11965	1.1152	0.99574	1.10215	1.0367	1.10947	0.9939	0.98712	1.04726	0.99824	1.0793	0.98898	0.97192	1.14764	1.01775	0.95599	0.96455	1.03674	1.03266	1.02171	0.9998	1.04305	1.17627	1.02554	1.08623	1.08191	1.06891	1.13456	1.19309	1.08335	1.04364	1.18743	1.14917	1.13029	1.2372	1.21971	1.0066	1.08434	1.00767	1.04942
15	1.0136	0.94149	1.0728	1.01347	1.04205	1.11144	1.01528	1.04683	0.95346	1.09081	1.13854	0.98151	1.0765	1.01659	1.12496	0.97814	0.99944	1.04108	1.08916	1.08007	0.95013	0.99226	1.16041	1.03099	0.98778	0.97768	1.04257	1.02382	1.03129	1.0095	0.97923	1.12755	1.02652	1.15596	1.11309	1.10519	1.09072	1.1027	1.09188	1.10234	1.20632	1.2038	1.17283	1.29914	1.1774	1.02395	1.10789	1.00378	1.11916
15.5	0.9902	1.02299	1.05792	1.03219	1.07571	1.07724	0.97992	1.04306	0.97101	1.10462	1.14218	1.04103	1.14298	1.03808	1.11863	1.04612	1.0227	1.06196	1.0201	1.09925	0.96633	1.00861	1.16606	1.06047	0.99137	0.93335	0.99218	1.05119	1.03408	1.00616	1.0366	1.09919	1.08289	1.07588	1.14361	1.05021	1.12469	1.18409	1.06847	1.14896	1.18809	1.16149	1.13796	1.33538	1.21182	1.01501	1.03033	1.0343	1.05152
16	1.02328	1.03263	0.98791	1.10975	1.02299	1.01292	1.04571	1.10772	0.96907	1.14156	1.16029	1.00848	1.08941	1.04382	1.05566	0.95087	1.04226	1.04337	1.04412	1.08577	1.02493	1.0336	1.15064	1.00588	0.93893	0.95291	1.01071	1.04764	1.03144	0.98853	1.06586	1.12616	1.05792	1.11605	1.10167	1.08268	1.11071	1.15609	1.08492	1.14638	1.201	1.19822	1.20628	1.21121	1.19969	1.01763	1.10512	1.03916	1.10908
16.5	1.00344	0.99614	1.0423	1.05173	1.02575	1.08918	1.03791	1.09042	1.04538	1.0647	1.13497	1.01227	1.15058	1.0758	1.10958	0.93934	1.01377	1.02083	1.00617	1.09602	1.00306	1.02393	1.20095	1.03605	1.01066	0.98549	1.03138	1.03013	1.00135	0.9819	1.05056	1.13223	1.07963	1.12213	1.09209	1.05618	1.10238	1.1618	1.06566	1.08533	1.20974	1.19009	1.21197	1.32661	1.19011	1.05285	1.0974	0.99169	1.08441
17	0.98178	1.02217	1.08685	1.05167	1.10506	1.04932	1.03746	1.09371	0.97308	1.08533	1.09711	0.97582	1.17138	1.06433	1.10361	0.97406	1.06965	1.04079	1.03789	1.18097	0.98389	0.9895	1.19398	1.0395	1.04683	0.96207	1.10465	1.04543	1.03642	0.9912	1.03733	1.23792	1.06318	1.10175	1.07863	1.11962	1.13656	1.15281	1.0927	1.11582	1.16599	1.20595	1.2097	1.31845	1.25484	1.08428	1.05105	1.05212	1.07544
17.5	1.04803	1.00139	1.03701	1.027	1.04378	1.06758	1.01966	1.15622	0.96407	1.12583	1.15415	1.02192	1.1759	1.08164	1.11915	1.00227	1.06098	1.05783	1.0829	1.12351	1.00791	1.04749	1.20063	1.06054	0.95715	0.97824	1.06251	1.0287	1.01593	0.99459	1.04131	1.16578	1.03594	1.07203	1.12005	1.08294	1.10028	1.18283	1.14258	1.1092	1.2388	1.20913	1.20367	1.25244	1.23544	1.09674	0.98317	0.99638	1.10125
18	1.07402	1.06266	1.05211	1.06822	1.09124	1.04169	1.04673	1.09674	1.01548	1.13967	1.03491	0.99149	1.18334	1.07562	1.13221	1.03538	1.00878	1.04574	1.09025	1.09704	1.00509	0.99557	1.1943	1.03751	0.98754	0.98861	1.07131	1.05662	1.00498	0.97033	1.05316	1.16909	1.03371	1.12102	1.09572	1.08508	1.17937	1.15144	1.04496	1.13894	1.22867	1.15567	1.19167	1.31431	1.31116	1.01908	1.11017	1.00419	1.03733
18.5	1.02497	1.04689	1.02828	1.06999	1.06677	1.07186	0.98276	1.11543	1.01411	1.14906	1.09786	0.98981	1.18617	1.0714	1.12018	0.96373	1.04394	1.05925	1.04621	1.13934	0.98755	1.01095	1.22585	1.06767	1.01189	1.015	1.0733	1.04882	1.00709	1.00983	1.0266	1.18353	1.03205	1.17924	1.08643	1.10528	1.13121	1.17627	1.13622	1.16056	1.23992	1.18719	1.23269	1.28827	1.29397	1.004	1.13136	1.02269	1.13131
19	1.01794	1.05096	1.0688	1.07024	1.07048	1.05685	1.04795	1.12855	0.94269	1.13681	1.11871	1.02023	1.20599	1.08492	1.19811	1.00306	1.0216	1.07661	1.05037	1.1387	0.99785	1.00409	1.22546	1.07357	0.998	0.99656	1.06379	1.06713	1.01623	0.99321	1.07652	1.23063	1.05138	1.20657	1.08712	1.10753	1.15292	1.21247	1.06987	1.09824	1.26523	1.20343	1.20473	1.38003	1.27852	1.0564	1.10272	1.02913	1.13892
19.5	1.04958	1.06439	1.05291	1.12291	1.08318	1.0251	1.03296	1.11731	1.03587	1.17408	1.04968	0.98073	1.21295	1.08265	1.20578	0.99776	1.04168	1.09242	1.06116	1.1663	1.03702	1.06634	1.26546	1.08324	0.96003	1.01403	1.10973	1.03844	1.00976	1.00281	1.06251	1.18626	1.04951	1.10966	1.14611	1.06845	1.12626	1.151	1.08537	1.08674	1.2871	1.18423	1.25983	1.33736	1.25325	1.05607	1.16085	0.98317	1.08502
20	1.02268	1.0481	1.11144	1.08092	1.04811	1.14413	1.07756	1.10659	1.07611	1.1701	1.17026	1.02219	1.26179	1.09203	1.19178	1.01946	0.99182	1.09558	1.05191	1.16234	0.99485	1.02558	1.22986	1.03389	0.99009	1.00345	1.07986	1.09878	1.03454	0.98265	1.07113	1.19653	1.0907	1.14744	1.12929	1.10693	1.23557	1.2016	1.13571	1.11573	1.2299	1.20494	1.22957	1.28493	1.29648	1.10463	1.17561	1.04156	1.10478
20.5	1.01231	1.03806	1.02843	1.12241	1.05242	1.11647	1.05163	1.1289	1.03542	1.1108	1.09216	1.05577	1.21095	1.06794	1.20342	0.98789	1.04283	1.12112	1.04362	1.12363	1.03018	1.04197	1.25501	1.05306	0.92364	0.97307	1.09726	1.1018	1.01283	0.98453	1.04888	1.21604	0.9739	1.24172	1.09891	1.12519	1.13247	1.21566	1.12163	1.15263	1.23844	1.14581	1.21134	1.29253	1.28356	1.05552	1.16738	1.04181	1.11295
21	1.06642	1.07568	1.08067	1.09471	1.04851	1.08328	1.05823	1.16592	0.95743	1.14838	1.10199	1.01801	1.24693	1.09087	1.13189	0.97989	1.04308	1.10505	1.10654	1.15526	1.04758	1.02354	1.24184	1.06396	1.02747	0.97668	1.12614	1.07059	1.02465	0.9854	1.02399	1.21377	1.05102	1.20389	1.05723	1.12931	1.10003	1.17327	1.089	1.14688	1.20156	1.22025	1.18658	1.30928	1.34162	1.08536	1.14603	1.03394	1.04025
21.5	1.03207	1.00256	1.08328	1.07439	1.11927	1.09462	1.03071	1.13366	0.99523	1.16732	1.16139	1.01828	1.29507	1.12519	1.15004	1.05626	1.08487	1.09951	1.05165	1.11514	0.98954	1.03815	1.27575	1.06723	0.96374	1.00653	1.0867	1.08717	1.03564	0.99055	1.04629	1.20758	0.94112	1.07847	1.09284	1.10208	1.11823	1.17517	1.10605	1.18558	1.235	1.14498	1.22781	1.35348	1.25527	1.07782	1.15311	1.02448	1.09436
22	1.01706	1.08074	1.12488	1.04919	1.1059	1.00744	1.02485	1.15336	0.98568	1.08524	1.11786	0.98166	1.28342	1.08944	1.16377	1.00395	1.07987	1.10259	1.03554	1.13819	0.97944	1.03262	1.21624	1.03811	1.07209	1.03513	1.05671	1.06244	1.0288	0.99883	1.0656	1.20087	1.03135	1.09749	1.06856	1.1007	1.15527	1.19082	1.0804	1.12998	1.16826	1.18814	1.20656	1.38131	1.29351	1.01983	1.10592	1.06684	1.07123
22.5	1.10802	1.04365	1.08307	1.09625	1.05182	1.09915	1.0223	1.12413	1.04547	1.15811	1.13954	1.00941	1.28295	1.08154	1.15194	0.98772	1.03484	1.09411	1.11799	1.13703	1.04749	1.03728	1.25353	1.06163	1.05656	1.02392	1.05828	1.04329	1.02873	0.99124	1.02851	1.23448	0.99723	1.1483	1.12054	1.09134	1.10278	1.21994	1.10995	1.1303	1.21629	1.16168	1.21015	1.40117	1.25948	1.05111	1.09286	0.99824	1.09682
23	1.04731	0.95888	1.04411	1.09272	1.00017	1.06105	1.03838	1.1504	1.0042	1.11633	1.12667	1.01736	1.26127	1.07691	1.14209	1.01734	1.02426	1.09968	1.09536	1.15029	0.99362	1.04598	1.20069	1.03547	0.93938	0.98387	1.13667	1.04854	1.04506	0.9854	1.07129	1.22633	0.99514	1.1376	1.13354	1.08629	1.17576	1.23899	1.09171	1.1503	1.19195	1.16559	1.23758	1.33277	1.324	1.05365	1.09977	0.98131	1.05367
23.5	1.02477	1.04306	1.05924	1.14072	1.06201	1.06179	1.04325	1.19241	1.00174	1.11818	1.16018	1.02136	1.2585	1.09734	1.16223	1.0133	1.03205	1.07614	1.07352	1.13872	1.03047	1.04707	1.20997	1.0946	1.01963	1.06046	1.09772	1.06082	1.03065	0.97676	1.03585	1.14537	1.01663	1.06853	1.06721	1.10275	1.13532	1.20276	1.06916	1.11903	1.17688	1.1386	1.18227	1.34665	1.25948	1.0562	1.16082	0.98129	1.10462
24	0.99978	1.08292	1.00934	1.15951	1.02039	1.01707	1.04309	1.1409	0.96711	1.14137	1.12547	1.01166	1.24028	1.08548	1.22085	0.95904	1.04351	1.08329	1.08622	1.1733	1.01103	1.04302	1.22735	1.07943	1.05661	1.0094	1.08104	1.05147	1.0157	0.96259	1.02459	1.19752	1.02401	1.13806	1.12512	1.0925	1.14279	1.18668	1.10463	1.11114	1.18615	1.14852	1.19651	1.31151	1.25887	1.04709	1.11009	1.00795	1.08327
24.5	1.06063	1.06385	1.12236	1.06639	1.10877	1.03305	1.06117	1.24378	1.0557	1.11612	1.13352	1.04137	1.33179	1.08785	1.16437	0.94418	1.07612	1.0595	1.09162	1.1527	1.00134	1.02118	1.20383	1.06631	0.96088	1.00815	1.09517	1.06004	0.9924	0.96866	1.0298	1.29404	1.01972	1.17057	1.10625	1.09015	1.14522	1.21011	1.06087	1.13805	1.1608	1.16267	1.18878	1.33556	1.25457	1.0362	1.1609	1.02278	1.08139
25	1.00642	1.07149	1.05002	1.10401	1.00989	1.096	1.08099	1.17002	1.03168	1.18166	1.11443	1.01017	1.27852	1.11599	1.123	0.98431	1.10034	1.10899	1.08659	1.16631	1.00588	1.04093	1.17048	1.04995	0.94365	1.05131	1.13214	1.06762	1.01259	0.98698	1.02159	1.21712	1.00162	1.17498	1.08899	1.05757	1.12177	1.18293	1.08967	1.12731	1.17623	1.14877	1.14797	1.31941	1.21529	1.0741	1.13939	0.9946	1.07629
25.5	1.01802	1.01545	1.15701	0.98947	1.04632	1.02587	1.0452	1.18577	0.92819	1.17143	1.01512	1.01411	1.2911	1.04551	1.17113	0.95923	1.0219	1.121	1.07023	1.16433	0.99903	0.99709	1.19965	1.03228	0.9719	1.02502	1.06519	1.09603	1.01923	0.97202	0.98079	1.18989	1.02786	1.11863	1.07604	1.07039	1.16021	1.21054	1.05881	1.13507	1.1774	1.13823	1.1818	1.36967	1.22444	1.02737	1.16337	0.98839	1.09476
26	0.99321	1.0888	1.09819	1.04778	1.03338	1.06513	1.03122	1.11183	0.96907	1.09444	1.05637	1.04579	1.24805	1.08674	1.17151	0.98964	1.03627	1.08967	1.13663	1.1553	1.02677	1.02317	1.22145	1.05777	1.01392	0.99095	1.11279	1.03594	1.01374	0.97063	1.01432	1.2515	1.05003	1.16007	1.08165	1.08508	1.09296	1.13283	1.03762	1.15705	1.16275	1.15657	1.18831	1.31889	1.27784	1.01067	1.09426	0.97651	1.11818
26.5	1.0171	1.05783	0.99609	1.06743	0.98432	1.07184	1.01897	1.16064	0.98412	1.1551	1.13796	0.99246	1.28117	1.06544	1.16696	0.98762	1.00811	1.0884	1.09112	1.15721	0.99773	1.03886	1.2438	1.07876	0.97598	1.04967	1.11139	1.02028	1.03949	0.98469	1.06612	1.17934	1.0146	1.21317	1.09037	1.0916	1.16261	1.12608	1.06575	1.11119	1.14479	1.14886	1.19314	1.36898	1.23037	0.97115	1.21136	1.04216	1.04046
27	1.01401	1.01595	1.08642	1.05018	1.04158	1.07451	1.02735	1.20178	0.99399	1.10706	1.13574	1.02196	1.24982	1.08682	1.17402	0.99516	1.03042	1.07911	1.04108	1.11721	1.01749	1.01214	1.16575	1.0447	0.98357	1.0164	1.07945	1.02594	1.03683	0.96177	1.02131	1.25241	1.01821	1.08704	1.07903	1.05213	1.12798	1.13129	1.05863	1.12074	1.2045	1.10296	1.20393	1.34026	1.24241	1.02312	1.11576	0.98509	1.0743
27.5	0.95134	1.04004	1.08359	1.05688	1.04928	1.08605	1.02707	1.1252	0.90194	1.11525	1.05984	0.99635	1.21142	1.05646	1.15028	1.01698	1.01874	1.05551	1.10429	1.13756	1.02203	1.04224	1.1649	1.05342	0.93916	1.02353	1.10867	1.07524	1.00724	0.95742	1.06264	1.25631	1.02206	1.03181	1.08904	1.10968	1.20235	1.19775	1.05943	1.16465	1.19377	1.10764	1.13131	1.34217	1.25868	1.02582	1.07708	1.02393	1.17234
28	1.0225	1.06024	1.11621	1.03453	1.04921	1.06308	1.02209	1.14167	1.02195	1.09563	1.07226	0.93922	1.20902	1.02815	1.14857	0.94822	1.07331	1.10892	1.11611	1.09771	1.04057	1.01521	1.18787	1.06337	0.92811	1.01044	1.09715	1.02975	1.03947	0.96416	1.02321	1.23393	1.02163	1.07091	1.10881	1.09026	1.15266	1.13328	1.06577	1.06425	1.15691	1.12825	1.16983	1.38263	1.25408	1.01646	1.06474	0.99054	1.12003
28.5	1.0727	1.0001	1.0561	1.0726	1.09128	1.08339	1.04839	1.15317	0.94724	1.15474	1.08037	1.02342	1.22921	1.07391	1.16055	0.91826	1.04511	1.08729	1.06452	1.1653	1.00199	1.03027	1.17538	1.06087	0.96677	0.99826	1.01484	1.03489	0.99627	0.96111	0.9994	1.18651	1.01642	1.12295	1.10144	1.07107	1.10374	1.10593	1.05014	1.08168	1.1869	1.13481	1.18268	1.27832	1.26062	0.99287	1.13141	0.97	1.11444
29	1.00822	1.02601	1.03022	0.9824	1.08385	1.08148	1.02071	1.19811	1.02166	1.1071	1.0041	1.05233	1.26892	1.02728	1.10414	0.98652	0.97557	1.1018	1.08459	1.12994	0.97943	1.05454	1.21418	1.07339	0.96914	1.03964	1.0795	1.03961	1.05119	0.9936	1.02665	1.22253	1.00739	1.05144	1.09718	1.0968	1.13285	1.12363	1.01917	1.05965	1.1864	1.04722	1.17673	1.38634	1.22853	1.00378	1.13706	0.98193	1.09826
29.5	1.10972	1.04458	1.07895	1.12171	1.06227	1.09912	1.03263	1.16237	0.95193	1.08748	1.01428	1.03498	1.23008	1.03189	1.14517	0.97105	1.02969	1.09912	1.04754	1.15276	1.03847	1.02131	1.12638	1.10127	0.94742	0.97572	1.11879	1.06527	1.01838	0.95278	1.10036	1.1992	0.98977	1.11407	1.06059	1.04079	1.15728	1.13471	1.0403	1.0827	1.17704	1.08096	1.19076	1.26657	1.22248	1.02929	1.14816	0.97561	1.13213
30	1.04293	1.02357	1.05875	1.1507	1.02545	0.96228	1.03983	1.08945	1.0764	1.05377	1.02681	0.97608	1.30316	1.03758	1.15186	0.93946	1.02293	1.02951	1.08043	1.12104	1.01482	1.01577	1.14274	1.04728	0.96863	0.975	1.07493	1.04021	1.02028	0.97767	0.98124	1.21878	0.9655	1.14201	1.08194	1.09043	1.0788	1.16913	1.03795	1.06868	1.16403	1.13876	1.16341	1.29312	1.23117	0.99104	1.09197	0.99395	1.10653
30.5	1.04044	1.08455	1.10855	1.02518	1.02807	1.01939	1.06518	1.12915	0.88881	1.13739	0.99083	0.97737	1.25129	1.03992	1.17276	0.95369	1.0447	1.0687	1.07956	1.12402	0.96449	0.95173	1.16719	1.06669	1.0266	0.98507	1.08794	1.03723	1.0097	0.96104	1.03604	1.22617	0.95871	1.04403	1.06865	1.07048	1.15213	1.08359	1.03768	1.04321	1.16208	1.09769	1.15019	1.25552	1.2409	1.00043	1.08154	1.00339	1.07285
31	0.97656	1.0198	1.07845	0.99881	1.07172	1.03213	1.07701	1.15561	0.99106	1.09325	0.98324	0.97674	1.25932	1.06167	1.16912	0.938	0.98688	1.05237	1.03917	1.13204	0.98419	1.03444	1.18064	1.06972	0.93032	1.00848	1.17847	1.00174	1.02571	0.98268	0.99746	1.21612	0.98676	1.07309	1.10673	1.0501	1.07125	1.13592	1.01275	1.12125	1.21641	1.09375	1.17848	1.25299	1.1712	1.02098	1.08097	0.99728	1.1042
31.5	1.02187	1.07782	1.10886	1.05597	0.98291	1.00169	1.01492	1.13637	1.06644	1.13676	0.94347	0.98218	1.23531	1.04947	1.09091	0.97092	1.02067	1.03304	1.0044	1.10634	1.00452	0.9916	1.15607	1.06851	0.96337	1.02769	1.03672	1.0296	1.0066	0.98553	1.02252	1.18112	0.97916	1.06888	1.07742	1.06145	1.10632	1.06507	1.0354	1.11917	1.16646	1.05952	1.13938	1.24157	1.21198	1.00942	1.0692	1.03041	1.08226
32	1.05175	1.06583	1.03304	1.02501	0.99491	1.01088	0.98755	1.09823	0.99886	1.13176	0.98828	1.03184	1.22577	1.03131	1.10975	0.97171	1.07797	1.08697	1.07786	1.12179	0.98792	0.98747	1.18195	1.0874	0.94172	1.00134	1.05737	1.04236	1.02557	0.96419	0.97485	1.18358	0.98767	1.02846	1.09736	1.10349	1.13318	1.10836	1.03624	1.12572	1.15597	1.06241	1.14118	1.2697	1.20645	0.96703	1.07571	1.0352	1.11895
32.5	0.99515	1.08007	1.06185	1.15856	1.01807	1.11701	1.05904	1.13379	0.97822	1.16706	0.97516	0.97232	1.25967	1.00926	1.15198	0.96411	1.06224	1.08862	1.0438	1.13836	1.01116	1.00184	1.1585	1.07085	0.97209	1.01056	1.06999	1.02473	0.98183	0.95061	1.0236	1.26675	1.05815	1.07527	1.04725	1.09548	1.14168	1.10253	1.04746	1.08727	1.17304	1.10172	1.0959	1.34665	1.21824	0.99177	1.05511	1.01333	1.07163
33	1.03179	1.03521	1.07215	1.01403	1.02283	1.02979	1.04952	1.09485	0.98061	1.12314	0.97044	1.05165	1.21266	1.03364	1.11631	0.9233	1.0062	1.12252	0.98423	1.0726	0.9833	0.97839	1.11961	1.04563	0.98582	1.02397	1.08371	1.03954	1.0251	0.9481	0.98624	1.23363	1.0074	1.09769	1.04607	1.06792	1.15804	1.09192	0.98045	1.02585	1.13246	1.05486	1.1733	1.27351	1.23028	0.96993	1.10345	0.96343	1.07051
33.5	1.00601	1.0794	1.00577	1.07395	0.99412	1.02551	1.03251	1.13888	0.97401	1.11103	0.92498	0.97116	1.19094	1.04734	1.12353	0.959	1.03524	1.05018	1.0378	1.11648	1.00586	0.97505	1.11529	1.06043	0.96733	1.02804	1.06352	1.01373	1.02376	0.96076	1.01834	1.18459	0.99758	1.15028	1.08651	1.06535	1.1205	1.13761	1.05604	1.02435	1.15294	1.10025	1.15274	1.2466	1.21935	1.03099	1.1059	1.03307	1.11306
34	0.97304	1.06376	1.02619	1.06859	0.99158	1.06806	1.00762	1.09373	0.9178	1.13416	0.90532	1.05386	1.12106	1.06143	1.09486	0.95041	1.04731	1.05512	1.0364	1.09521	1.01062	1.00485	1.14611	1.02911	1.03262	1.02182	1.03741	1.01887	1.00175	0.95298	0.99776	1.23095	0.98856	1.08242	1.04083	1.07054	1.0267	1.11235	0.98969	1.02102	1.14411	1.06583	1.17287	1.25226	1.21127	0.98653	1.04968	1.00927	1.05364
34.5	1.0594	0.98958	1.05749	1.05024	0.98903	1.00624	1.06714	1.15044	0.98293	1.15496	0.91104	1.01231	1.20904	1.03782	1.14067	0.94117	1.01511	1.04344	1.05898	1.15421	1.01026	0.9766	1.17084	1.06515	0.9777	0.98048	1.12344	1.04177	0.99478	0.9673	0.96127	1.15974	0.98317	1.09135	1.05752	1.06134	1.13414	1.12653	0.95775	1.05454	1.15453	1.0622	1.14373	1.24098	1.24471	0.98797	1.0054	1.01839	1.07987
35	1.00027	1.0722	1.06742	1.1062	1.01172	1.05437	1.01553	1.0931	0.93481	1.13267	0.8848	0.94927	1.27444	1.04575	1.13626	0.93094	1.02645	1.04896	1.02329	1.17591	0.99484	0.98059	1.13129	1.03043	0.95221	0.99318	1.10502	1.08233	0.97602	0.96685	0.93187	1.23237	0.97984	1.03709	1.03856	1.05475	1.08859	1.15393	0.96912	1.01249	1.14339	0.99935	1.15394	1.27803	1.2133	0.94948	1.00417	1.03771	1.12704
35.5	1.04702	1.05114	1.05896	1.08539	1.05777	1.07007	1.02062	1.06366	1.03898	1.03095	0.92575	1.03689	1.21172	1.04419	1.17432	0.91727	1.0649	1.05667	1.04181	1.11062	1.03385	1.02245	1.12968	1.01661	0.99118	0.94584	1.07614	1.02351	1.00021	0.94894	0.99589	1.21328	1.0288	1.10961	1.00689	1.03235	1.1513	1.09792	0.98007	1.00968	1.11285	1.06069	1.16726	1.24576	1.20783	0.98645	1.02971	1.02127	1.09566
36	1.01653	1.0107	0.96331	1.10817	0.97895	1.0363	1.03216	1.10169	0.89816	1.13711	0.9591	1.04887	1.24355	1.05254	1.12419	0.949	1.00854	1.07498	1.06195	1.14648	0.97196	1.01936	1.12194	1.03714	0.93564	0.99512	1.08927	1.0245	1.01838	0.95161	1.00371	1.2434	0.98464	1.00787	1.04026	1.07499	1.09066	1.10391	0.97841	1.01837	1.07982	1.05847	1.12531	1.20919	1.19395	0.96219	1.06468	1.00953	1.11693
36.5	1.01573	1.02832	0.9865	1.03819	1.04679	1.06666	1.0274	1.13141	0.93334	1.10048	0.87058	1.0249	1.18895	1.03932	1.1272	0.99325	1.01932	1.07315	1.02675	1.11414	0.97404	1.00299	1.1524	1.01908	1.00565	1.01978	1.06414	0.9878	0.98146	0.9475	1.00616	1.10475	0.97669	1.07685	1.02357	1.08832	1.15991	1.12713	1.05079	1.01431	1.08128	1.04969	1.13844	1.18973	1.15121	0.99818	1.01441	0.97032	1.17009
37	1.02	1.07649	0.99467	1.03742	1.03801	1.04983	1.05685	1.11474	0.93485	1.12496	0.90339	1.00686	1.23996	1.0513	1.08178	0.96602	0.98257	1.03999	1.02979	1.12433	0.9855	0.98	1.1626	0.99749	0.93055	1.02064	1.04108	1.03736	0.99079	0.94917	1.00576	1.16429	0.98114	1.02709	1.00574	1.04429	1.05199	1.10149	0.97309	0.989	1.13421	1.01571	1.14934	1.25534	1.21259	0.93977	1.05759	1.00795	1.08316
37.5	0.99307	1.06464	0.97687	0.96471	1.03244	1.04925	1.03077	1.09102	0.95756	1.09165	0.91317	1.06175	1.20089	1.03093	1.12557	0.92577	1.03356	1.0644	1.04856	1.10523	0.96931	1.00659	1.15095	1.03281	0.98869	1.01216	1.01626	1.01103	0.99648	0.95503	0.976	1.1739	0.9549	1.1091	1.05386	1.0903	1.12283	1.11728	0.99987	1.00092	1.13679	1.07662	1.13206	1.24337	1.2288	0.97285	1.02968	1.009	1.08688
38	1.04842	1.00337	0.98096	1.01776	0.99097	1.0481	1.05581	1.15142	0.98716	1.19152	0.9726	1.02596	1.1481	1.06683	1.154	0.96722	1.01991	1.06305	1.06987	1.14368	0.98665	1.00057	1.13342	1.02447	0.99308	1.00679	1.06526	1.01447	0.97143	0.96182	0.99506	1.16738	1.01769	1.07253	1.06278	1.02508	1.11846	1.0424	1.04644	1.03639	1.10769	1.03687	1.20605	1.21686	1.1544	0.95188	1.07178	0.96517	1.14582
38.5	1.06061	1.04606	1.07375	1.07088	1.0537	1.04579	0.98469	1.15042	0.87301	1.12073	0.86058	1.01079	1.24825	1.0251	1.11357	0.93981	1.00828	1.06113	1.03276	1.08666	0.99695	0.99461	1.12336	1.04912	0.99258	0.96396	0.9903	1.04449	0.97742	0.95946	0.962	1.23225	0.99746	1.05402	1.03338	1.04094	1.09054	1.06293	0.9998	1.03301	1.13266	1.10832	1.13163	1.27605	1.18394	0.99232	1.03568	1.03579	1.06096
39	0.96529	1.05119	1.03077	0.97984	1.02287	1.01075	1.03433	1.15008	0.92652	1.13758	0.85113	1.03502	1.21398	1.02951	1.12195	0.9806	1.03121	1.04461	1.04297	1.09046	1.00788	1.01682	1.10612	1.04826	0.96822	0.98244	1.08755	1.05849	1.00186	0.94456	0.98439	1.15189	0.98218	1.04566	1.0534	1.05759	1.11402	1.12377	0.9847	1.0061	1.09998	1.05878	1.12698	1.24715	1.1809	0.952	0.98414	0.9861	1.06338
39.5	1.01166	1.03859	1.03397	1.0764	1.01254	0.9914	1.01053	1.09124	0.95592	1.06663	0.83848	1.01255	1.22631	1.01199	1.1665	0.89067	0.99239	1.05237	0.99	1.09825	1.0164	0.97541	1.14201	1.03747	0.9848	0.98549	1.09941	1.05426	0.98664	0.93993	0.95492	1.18157	0.96866	1.09206	1.0738	1.05328	1.09874	1.10113	0.96455	1.02439	1.12974	1.03792	1.11719	1.15228	1.17596	0.97749	0.98355	0.97035	1.05643
40	1.01383	0.99123	0.96248	1.00856	0.97434	1.0158	1.0334	1.10088	0.93154	1.11623	0.85994	1.01914	1.16267	1.03519	1.116	0.94381	0.95687	1.04384	1.03377	1.08131	0.98153	0.96191	1.11689	1.04594	0.94654	0.99962	1.0426	1.02573	0.98016	0.94316	0.99495	1.10743	0.96201	1.05762	1.05314	1.10171	1.13676	1.1326	0.93995	1.01796	1.11941	1.01571	1.15168	1.25721	1.20786	0.96358	0.99121	1.00018	1.04454
40.5	0.99212	1.01997	0.9817	1.05827	1.03677	1.03362	1.00199	1.05679	0.97671	1.11474	0.90266	1.03162	1.17328	1.03509	1.11842	0.88302	1.02554	1.04067	1.00839	1.11811	1.00891	1.00959	1.09389	1.05072	0.97789	0.95413	1.04779	1.00297	0.99547	0.95672	0.98932	1.13789	0.96473	1.02243	1.0356	1.03015	1.03785	1.03714	0.9783	1.04127	1.12559	1.06463	1.12645	1.29753	1.20301	0.95105	1.04758	1.0243	1.03216
41	0.99589	0.99779	1.01085	1.03277	0.99446	1.03506	1.05012	1.08823	0.92017	1.08865	0.91322	1.05984	1.19711	0.9793	1.10021	0.96055	0.99823	1.02421	1.03312	1.05859	0.98413	0.98894	1.07515	1.04175	0.98738	1.00367	1.04118	1.04717	0.97421	0.94767	0.95872	1.21662	0.96309	1.10854	1.02478	1.02354	1.02723	1.06024	0.95449	1.03721	1.09253	1.00748	1.13634	1.27234	1.17163	0.97622	1.00608	0.99659	1.05454
41.5	1.10225	1.0068	0.93454	1.05287	1.04129	1.0204	1.00771	1.11136	0.99217	1.09222	0.91462	1.00272	1.19959	1.03206	1.07869	0.91475	0.99447	1.05149	1.03706	1.04386	0.98638	0.96471	1.0991	1.0013	1.00701	0.95752	1.04679	0.99565	1.01014	0.9432	0.94624	1.13546	0.98205	1.06772	1.04549	1.04854	1.09155	1.10034	0.93514	0.98631	1.07791	1.02236	1.1452	1.25009	1.18944	0.96236	1.00444	0.9924	1.09009
42	0.96905	1.03215	0.98939	1.01424	0.95417	1.0589	0.98539	1.07025	1.00591	1.11354	0.89115	0.98432	1.18602	1.02309	1.16319	0.95582	0.97331	1.0601	1.00526	1.04758	0.97441	0.99113	1.08929	1.06611	0.96836	0.99281	1.01752	1.01351	0.97584	0.93253	0.98797	1.19173	0.97578	1.11488	1.06485	1.04964	1.04813	1.08103	0.96821	1.01709	1.09181	1.02578	1.13812	1.17497	1.18277	0.92352	0.99949	1.00953	1.05911
42.5	0.98417	1.00793	0.85223	1.04149	1.01347	1.02517	1.01706	1.13516	0.89685	1.13267	0.90815	1.00812	1.15646	0.98912	1.07384	0.93924	0.96994	1.01712	0.99152	1.10224	0.99676	0.94146	1.07054	1.06296	0.97665	0.93925	1.04224	0.99695	0.98889	0.95317	0.94839	1.11392	0.96976	1.152	1.03724	1.03839	1.01905	1.06029	0.93625	1.0389	1.0744	1.05366	1.09637	1.23999	1.15986	0.91853	1.00785	0.9885	1.10446
43	1.01493	1.00953	0.87517	1.03297	0.99128	1.11077	1.00209	1.05112	0.95738	1.09238	0.85727	1.03627	1.19194	0.99258	1.12874	0.98953	0.97629	1.05757	1.00401	1.09536	0.99187	0.98635	1.10438	1.04547	1.01974	0.98432	1.13932	1.0038	1.01126	0.93316	0.95269	1.13972	1.04043	1.04606	1.03537	1.04074	1.08198	1.06171	0.9656	0.93659	1.1186	1.02828	1.12015	1.21517	1.17734	0.97447	1.06944	1.00955	1.03369
43.5	0.96314	1.00179	0.96854	1.00504	0.99945	1.01387	0.97473	1.10397	0.94508	1.12096	0.87611	1.01104	1.18	0.97388	1.09461	0.91676	1.00528	1.05171	1.04614	1.10371	1.01155	1.02619	1.07292	1.02587	0.99333	1.01485	1.03951	1.025	1.00184	0.93811	0.99537	1.12302	1.01043	1.06016	1.01969	1.02878	1.07865	1.1344	1.00184	0.99769	1.10423	0.99571	1.09031	1.20162	1.17933	0.89696	1.02643	0.97323	1.10229
44	1.01737	1.05096	1.00356	0.97453	1.01895	0.98462	0.99662	1.09034	0.9524	1.05352	0.87875	1.01981	1.10801	0.94374	1.07593	0.92586	1.00646	1.05117	1.01138	1.02208	0.92924	0.94766	1.05542	1.04674	1.01179	0.92598	1.08094	1.00116	0.97587	0.92454	0.96971	1.15609	0.98448	1.12959	1.03787	1.03636	1.04321	1.05343	1.0031	1.00355	1.09237	1.03647	1.14705	1.21374	1.1755	0.97769	1.01452	0.97962	1.09123
44.5	0.97325	0.93902	0.99289	1.02057	1.0117	0.98296	0.98306	1.08335	0.90018	1.0836	0.88406	1.03937	1.22147	0.98765	1.1012	0.92575	1.02727	1.05009	1.00371	1.06636	0.92277	0.95997	1.0504	0.99644	0.98109	0.95481	1.00468	1.05973	0.9955	0.93894	0.97495	1.12508	0.94	1.01695	1.00634	1.03074	1.08695	1.0811	0.98366	1.01714	1.07519	1.02664	1.11887	1.17023	1.17359	0.90592	1.02519	0.96375	1.04987
45	1.04138	0.97875	1.04568	0.99387	1.01161	1.04976	1.00748	1.08893	1.00809	1.11811	0.93439	1.05661	1.13868	0.97906	1.14366	0.93011	1.01722	1.09539	1.03035	1.05393	0.9635	0.97579	1.1172	1.03431	0.98349	0.98021	1.10355	1.06483	0.95463	0.94077	0.9657	1.11708	0.94984	1.0633	1.03151	1.04984	1.02806	1.08502	0.99344	1.00975	1.12071	1.0235	1.10422	1.2469	1.17869	0.94703	0.98371	0.99515	1.04656
45.5	1.05515	1.0027	1.00709	1.04164	0.98955	0.97348	1.00038	1.09146	0.94727	1.0964	0.90621	1.04057	1.14991	1.02066	1.05932	0.92659	0.98624	1.0434	1.0051	1.06248	0.9616	0.95267	1.08386	1.01914	1.00014	0.97807	1.08652	1.03262	0.99845	0.93845	0.96148	1.12262	0.958	1.00716	1.03284	1.0807	1.03248	1.12372	0.98526	1.01055	1.09917	1.06026	1.1249	1.21851	1.13809	0.9377	1.05307	0.96148	1.07775
46	0.9191	0.99454	0.93278	1.00491	1.02691	0.94001	1.02175	1.06702	0.99798	1.12131	0.87313	1.04257	1.22312	0.96796	1.11177	0.96621	0.98567	1.04782	0.99538	1.06689	0.94477	0.93885	1.05954	1.03789	0.95709	1.01147	1.06805	1.02756	0.9815	0.93045	0.9553	1.12418	0.97573	0.99864	1.04221	1.02623	1.06729	1.09929	0.93277	0.98138	1.11155	1.04953	1.12325	1.21517	1.14476	0.98136	1.01296	0.99379	0.96247
46.5	0.99084	0.99947	1.01287	1.08458	0.97663	0.98774	0.97245	1.05101	0.97013	1.07871	0.86246	1.05584	1.15844	1.00531	1.16378	0.95755	0.95899	1.06203	0.99943	1.10771	0.93186	0.94293	1.0798	1.06891	0.96856	0.98878	1.04471	1.02458	0.97168	0.93089	0.9192	1.1771	0.96659	1.03587	1.00226	1.04665	1.03838	1.04226	0.97287	0.98863	1.10798	1.01062	1.14261	1.28974	1.10929	0.93488	0.99591	0.99274	1.07887
47	1.00288	0.99783	0.99154	0.97241	1.05696	1.03893	1.02809	1.10299	0.95581	1.02716	0.88717	0.99486	1.11612	0.98421	1.0939	0.92038	0.97115	1.07549	0.9852	1.02275	0.94498	0.94664	1.07139	1.01612	0.98498	1.00509	1.028	1.04577	1.01662	0.9467	0.98441	1.0917	0.98207	0.9107	1.01471	1.05046	1.03778	1.08505	0.98211	1.01317	1.06996	1.04035	1.13194	1.21014	1.14476	0.93131	0.9387	0.97341	0.99088
47.5	1.00965	1.00301	0.98978	1.05182	0.95145	1.00133	0.98392	1.0948	0.89566	1.08358	0.8837	0.99259	1.09505	1.00892	1.08247	0.92626	1.00426	1.01761	0.95819	1.11751	0.93787	0.97433	1.04379	0.99365	0.97908	0.99319	1.00814	1.01535	0.9819	0.93486	0.96923	1.11628	0.94774	1.00158	1.01345	1.03306	1.01925	1.09014	0.95957	0.97844	1.08334	0.99158	1.06398	1.26298	1.16932	0.92422	0.98231	0.96858	1.04529
48	1.01053	0.95455	0.92399	1.02878	0.99524	1.01448	1.02558	1.11514	0.94585	1.06373	0.90436	1.09728	1.15775	1.01685	1.08784	0.94303	0.98206	1.04708	0.99505	1.07963	0.95728	1.01356	1.09488	1.06645	0.92668	0.9952	1.02895	1.02476	0.97993	0.92532	0.96394	1.14683	0.97583	1.01903	1.01957	1.05759	1.0633	1.08621	0.95125	0.989	1.07292	1.0528	1.12717	1.24734	1.16938	0.93053	0.99917	0.95887	1.03616
48.5	1.0071	0.98837	0.86278	0.97186	0.99769	0.982	1.01359	1.04518	0.9982	1.10373	0.85998	1.00152	1.14834	0.98816	1.08874	0.92148	1.01912	1.04586	0.99518	1.05825	0.93528	0.98151	1.07682	0.98328	0.93991	0.94707	1.09246	1.01317	0.96094	0.93266	0.9457	1.14185	0.97146	1.10773	1.02987	1.00742	1.08665	1.09014	0.9462	0.98149	1.09417	0.97177	1.06998	1.21705	1.19496	0.96344	1.01613	0.96719	1.07921
49	1.05594	0.9627	0.95338	0.99036	0.99778	1.01155	0.99477	1.0447	0.947	1.0743	0.90722	1.00085	1.14655	0.98585	1.0667	0.88467	1.03267	1.00512	1.02616	1.09113	0.91016	0.94164	1.05049	1.01649	0.91877	0.96164	1.03545	1.00746	0.99113	0.9052	0.93643	1.07908	0.97861	1.04875	1.03404	1.03636	1.07158	1.06681	0.96467	0.97739	1.0594	0.97488	1.1166	1.1789	1.16303	0.92247	0.89219	0.98555	1.03094
49.5	0.98746	0.95326	1.0371	1.0431	1.00893	1.06782	1.01575	1.06986	0.96396	1.04172	0.91495	0.97357	1.14161	0.95767	1.10674	0.89181	1.01192	1.015	0.99686	1.04286	0.96178	0.94383	1.05299	0.96554	0.91684	0.98817	1.03782	1.03273	0.98886	0.92299	0.93653	1.08251	0.98141	1.01781	1.006	1.0562	0.97593	1.10796	0.93649	1.00774	1.083	1.04516	1.08481	1.20449	1.15621	0.95852	0.98382	0.94786	1.01314
50	1.00456	0.98144	0.96015	0.96869	0.99707	1.03772	0.97936	1.04888	0.99451	1.1212	0.91058	1.01398	1.19138	1.0448	1.09094	0.88319	0.97032	1.04498	0.99295	1.05595	0.93351	0.95704	1.05026	0.98145	0.96043	0.9825	1.06411	0.98469	0.96687	0.92785	0.93007	1.13674	0.91728	1.04043	1.01842	1.02753	1.08165	1.10581	0.96708	1.01009	1.05572	1.00582	1.09466	1.25442	1.14663	0.92172	0.99699	0.94745	1.04075
50.5	1.00612	0.98854	0.9556	1.06142	0.99695	1.02652	1.00441	1.08314	0.96995	1.06791	0.83326	1.03657	1.13756	1.00528	1.08546	0.92098	0.95248	1.03649	0.94588	1.06971	0.92465	0.9385	1.07388	1.00191	0.90042	1.0243	1.06229	1.02401	0.97576	0.9296	0.92248	1.14571	0.90544	1.03212	1.01074	1.03772	1.04293	1.10099	1.01917	0.9586	1.02138	0.97627	1.07033	1.18411	1.18818	0.93907	0.98551	0.97525	1.07865
51	0.97801	0.99641	0.97401	1.01081	1.02278	0.99259	0.96732	1.07342	1.0133	1.08449	0.85943	0.95381	1.09284	1.00736	1.06679	0.93738	0.94963	0.99386	0.99334	1.03768	0.93524	0.95913	1.03854	1.01245	0.96466	0.99292	1.02966	0.99814	1.0085	0.93282	0.94327	1.08428	0.95763	1.02502	1.0528	1.00306	1.04429	1.05795	0.94037	1.01144	1.05965	1.0381	1.07112	1.14218	1.2137	0.93168	0.99043	0.99102	1.04017
51.5	1.01309	0.96494	0.9647	0.98536	1.01711	1.01719	0.9964	1.04126	0.93078	1.04856	0.93346	0.972	1.12239	0.94734	1.07709	0.93691	0.99881	1.0808	1.00038	1.05011	0.92596	0.92958	1.0744	0.99038	0.99454	0.9982	1.05715	1.00077	0.99349	0.9052	0.95553	1.09189	0.96429	1.00468	1.01598	1.00462	1.00226	1.03288	0.99297	0.9848	1.0855	1.02104	1.10534	1.17137	1.20633	0.91893	0.99691	0.98919	1.03388
52	1.02246	1.01203	0.90397	1.10319	1.01252	1.02071	0.92993	1.06393	0.93224	1.08873	0.87817	0.99078	1.14309	1.00704	1.09469	0.94715	0.95456	1.08115	0.99285	1.06076	0.95425	0.95537	1.03603	0.9889	0.9655	0.99432	1.03505	0.99352	0.99175	0.91913	0.9099	1.09595	0.96774	1.01482	1.03042	1.02085	1.0137	1.07874	0.95369	0.97841	1.0685	0.98499	1.0968	1.16553	1.15142	0.9717	0.93924	0.97701	1.00993
52.5	0.91381	0.97981	0.98447	1.0285	1.02751	1.05173	0.97766	1.08334	1.00149	1.09373	0.85746	0.99331	1.11214	0.95508	1.06491	0.94756	0.96715	1.04218	0.97685	1.05042	0.92918	0.93499	1.06456	1.00333	0.99098	0.97289	1.06102	0.98377	0.97206	0.94106	0.94782	1.13029	0.99459	0.94413	0.97398	1.03867	0.99552	1.07496	0.95258	1.00678	1.07014	0.97726	1.09064	1.10466	1.18455	0.89157	1.025	0.94676	1.04767
53	1.01078	0.99181	0.99904	0.96847	0.98692	0.98229	0.97944	1.08073	0.99573	1.06829	0.83384	0.99783	1.10839	1.00285	1.07672	0.94772	1.02029	1.00689	1.01169	1.00313	0.9451	0.95034	1.05031	1.0606	0.96622	0.96202	1.01107	0.97007	0.98052	0.90425	0.9369	1.04483	0.96078	1.08694	1.00913	1.01858	1.0375	1.07867	0.94121	0.96872	1.08092	1.04756	1.16014	1.23581	1.19874	0.90704	0.94368	1.02114	1.05107
53.5	1.00329	0.9627	0.93217	1.05765	0.95274	0.97191	0.97707	1.01895	0.92431	1.01152	0.88166	0.9674	1.17546	0.96005	1.06998	0.92767	1.02947	1.01938	1.011	1.1076	0.92152	0.97085	1.07632	0.97478	0.9865	0.97325	1.0033	1.01582	0.95945	0.91555	0.94689	1.10633	1.02307	0.95868	1.02866	0.98768	1.03177	1.05358	1.01503	0.97559	1.07005	1.01022	1.10628	1.18606	1.17353	0.95954	0.94303	0.97392	1.02648
54	1.02135	1.00097	0.80636	1.03731	0.97015	1.04707	0.99776	1.08452	0.91996	1.06312	0.79874	1.00892	1.08666	0.99057	1.02376	0.90892	0.97604	1.04242	0.95828	1.06228	0.94022	0.95697	1.03224	1.00634	0.94402	1.00809	1.1133	0.99135	0.99865	0.93297	0.90991	1.12562	0.96044	0.99261	0.98442	1.04286	1.02258	1.0527	0.94871	0.9741	1.04029	1.00095	1.07163	1.25365	1.16346	0.96251	0.94873	1.01573	0.96918
54.5	0.97613	1.01293	1.06926	1.021	0.94081	1.00796	0.94289	1.02445	0.89189	1.02081	0.89417	0.99245	1.13746	0.968	1.10432	0.92834	0.9984	1.07971	0.96818	1.07634	0.9257	0.95144	1.07267	0.97361	1.01019	1.0074	1.02854	0.99038	0.98739	0.91594	0.96766	1.10952	0.98026	1.00787	1.0398	1.00955	1.04288	1.05293	0.94265	1.01224	1.066	1.00828	1.06963	1.19208	1.22527	0.9045	0.93139	0.97417	1.02908
55	0.99016	1.00458	0.92928	0.99316	0.99939	1.02461	0.98564	1.01901	0.9527	1.05282	0.86706	0.97359	1.12789	0.9751	1.09441	0.96169	0.9906	1.0075	0.97218	1.07137	0.90933	0.96332	1.02435	1.03078	0.96444	0.98326	1.01996	0.9747	0.97365	0.9217	0.94893	1.1159	0.94254	0.99697	1.01399	1.00519	0.99792	1.03213	0.93489	1.0477	1.02583	1.0048	1.04881	1.13488	1.17553	0.8885	0.97554	0.96334	1.03059
55.5	0.99797	0.9155	0.93979	1.03359	1.00886	1.01531	0.94179	1.03653	0.95752	1.03189	0.89729	0.98732	1.08005	0.99221	1.05229	0.88158	0.97205	1.03168	0.93452	1.01719	0.94576	0.94779	1.04982	1.01972	0.95392	0.98179	1.07638	0.97498	0.96423	0.91936	0.95755	1.1252	0.96739	1.05392	1.04003	0.98475	1.06683	1.01695	0.92558	0.95664	1.08698	0.93397	1.08972	1.17772	1.1794	0.94154	0.96381	0.9442	1.06685
56	1.01583	1.05906	0.96021	1.044	0.9491	1.06122	0.98661	1.06777	0.87295	1.01109	0.79659	0.97298	1.09204	0.96448	1.09807	0.96028	1.00948	0.98589	0.94351	1.01028	0.90779	0.94498	1.04183	0.98079	1.01236	0.98944	0.99368	0.98065	0.97037	0.9262	0.94507	1.11024	0.95758	1.06381	0.98097	1.02015	0.97187	1.04081	0.94256	0.93096	1.05686	0.94715	1.10526	1.10947	1.22275	0.88295	0.98661	0.95803	1.01051
56.5	1.01618	0.98021	0.93318	0.98697	0.96616	1.00052	0.99267	1.04135	0.84927	1.01266	0.76936	0.95456	1.06384	0.99728	1.02178	0.93792	0.93773	1.0304	0.94765	1.07228	0.90943	0.97372	1.03868	1.02101	0.9736	0.99976	1.0876	0.96058	0.96189	0.92977	0.92918	1.07766	0.979	1.03901	1.01034	1.02988	1.00579	1.08897	0.91514	0.94234	1.04429	0.969	1.08711	1.19641	1.18369	0.92394	0.96185	0.97238	1.03003
57	1.05504	0.90165	0.92467	1.02691	1.0244	1.01562	0.94535	1.04878	0.93848	1.06239	0.86803	1.00757	1.08414	0.95812	1.07689	0.97417	1.01116	1.02801	0.97699	0.99875	0.955	0.97372	1.06113	0.99432	0.88655	0.96572	0.99226	0.99365	0.98805	0.92231	0.95048	1.08202	0.94355	1.04124	1.01054	0.99704	0.98057	1.10189	0.98927	1.01048	1.09704	0.95979	1.05509	1.15301	1.18369	0.90799	0.90445	0.97273	1.01921
57.5	0.97699	1.03394	0.98579	1.01577	0.94736	1.01075	0.97539	1.02171	0.91264	1.01822	0.85754	0.94117	1.08883	0.96896	1.07083	0.9293	1.05182	1.02151	0.9826	1.06905	0.92487	0.95428	1.04392	0.96004	0.97095	0.98674	1.04725	1.01856	0.97647	0.92132	0.94591	1.13506	0.98765	1.10596	1.02533	0.99469	1.0041	1.04863	0.92108	0.98786	1.04577	0.93776	1.06084	1.15367	1.20411	0.90015	0.96212	0.96029	1.07335
58	0.97073	0.9184	0.84731	0.9965	0.95924	0.97837	0.9602	1.01541	0.95718	0.9999	0.85872	0.97321	1.10173	0.96999	1.08187	0.93594	0.94523	1.05929	0.98834	1.11299	0.95795	0.94371	1.02923	0.97841	0.93408	0.97361	1.12859	1.01512	0.97378	0.91291	0.91776	1.06884	0.94155	1.02593	0.99443	1.00198	1.02061	1.0976	0.94119	0.94598	1.04168	0.94296	1.05572	1.17846	1.16816	0.85976	0.98809	1.01136	1.04239
58.5	0.99926	0.91992	0.89534	0.97854	1.0346	0.97342	0.96694	1.03351	0.9584	1.00857	0.83576	0.97753	1.09476	0.97753	1.08706	0.90571	0.98039	1.00445	0.95496	1.04266	0.94484	0.92902	1.07278	1.0536	0.96656	0.9593	1.03861	0.99741	0.97796	0.90572	0.92242	1.07688	0.94894	1.00879	1.00629	0.99953	1.00968	1.12222	0.92643	0.94585	1.0362	0.92839	1.07622	1.15162	1.15649	0.9029	0.90897	0.94788	1.05605
59	0.96551	1.01262	0.8748	0.94054	0.99176	0.93501	0.96041	1.02689	0.95842	1.06127	0.80189	0.97751	1.08031	0.9564	1.06274	0.90144	0.96725	1.02736	0.98772	1.0147	0.94501	0.91019	1.04727	0.98479	0.93509	1.02075	1.0855	0.99933	0.97359	0.92561	0.91174	1.10729	0.96088	1.05144	1.03988	1.00803	1.02925	1.04242	0.97969	0.94389	1.0497	0.96154	0.99778	1.15569	1.17703	0.94289	1.04159	0.94557	1.05754
59.5	0.91155	1.0123	0.94886	1.06701	1.03417	1.0296	0.97918	1.08181	0.96169	1.0471	0.82139	0.9598	1.07277	0.98937	1.00115	0.92461	0.95736	0.98957	0.96047	1.06043	0.96068	0.93984	1.06118	1.00458	0.96929	0.98362	1.04961	0.98388	0.95399	0.94223	0.91858	1.05509	0.94849	1.02471	1.01825	1.00088	0.99744	1.08436	0.97202	0.9666	1.05592	1.03108	1.09188	1.13319	1.15695	0.87012	0.98935	0.97376	1.03192
60	0.9171	0.98612	0.90877	0.9447	0.97491	0.95849	0.96387	1.06564	0.96565	1.07934	0.79649	0.97192	1.12986	1.00076	1.06644	0.8945	0.96808	1.00367	0.93014	1.02224	0.95204	0.96666	1.03319	1.01735	0.92412	0.89969	1.11507	0.97733	0.9797	0.90444	0.95527	1.0519	0.97203	1.04033	1.00364	1.00383	1.06239	1.08257	0.93534	0.96874	1.04961	0.97935	1.09186	1.13436	1.17654	0.90814	0.91771	0.98871	0.96685
60.5
61
61.5
62
62.5
63
63.5
64
64.5
65
65.5
66
66.5
67
67.5
68
68.5
69
69.5
70	1.02711	1.0754	1.16561	0.94746	1.0433	0.95086	0.97539	0.99943	1.01879	0.98154	0.98636	0.98124	1.00531	0.99648	0.9958	0.96105	1.02793	0.93578	0.92812	0.99457	0.95922	0.96525	0.97245	1.05655	1.05914	0.97285	0.91435	0.98104	0.96153	1.0019	1.04237	0.98878	1.09623	0.97083	0.93138	0.96184	0.9458	1.02523	1.02228	1.03721	0.96378	0.99864	0.96284	1.03594	0.98741	1.06712	1.09636	1.0313	1.00447
70.5	0.99133	1.01196	1.06484	0.96662	1.01491	0.91005	0.96937	1.0632	1.09883	1.01431	1.05395	0.95441	1.00642	0.98209	0.94243	0.95432	1.03531	0.97085	0.98607	0.99194	1.06815	0.94514	0.94331	0.99947	1.02885	0.97798	1.02735	1.00152	0.97266	1.01305	1.03627	1.00544	1.11181	1.038	0.98886	0.95054	1.03993	1.0118	0.97712	1.0155	0.9538	1.0299	0.97152	0.99724	0.98112	1.04652	1.05117	0.98361	0.95592
71	0.90471	0.95947	1.0881	0.9437	1.00536	0.92451	0.94282	0.95624	1.04313	0.98971	0.99731	0.96349	1.00509	0.99423	0.98875	1.0308	0.96162	0.94245	0.95811	0.96354	1.02879	1.00532	1.01033	1.01639	0.99795	0.97802	0.97005	0.97085	0.97863	0.98316	0.99734	0.94888	1.08847	0.97816	0.91449	0.95709	0.96323	1.01169	1.05863	1.01365	1.01842	1.00833	1.02957	0.97479	1.02258	1.06777	1.0483	0.98321	1.0033
71.5	1.02274	1.0435	1.08316	0.9638	0.99678	0.90582	0.99062	0.99466	1.00166	1.0078	1.00637	0.99124	1.00281	0.98729	1.08349	1.00465	0.95746	0.95484	0.93366	0.97604	0.98576	0.97954	0.97758	0.98063	1.0985	0.9924	1.02843	0.99389	0.99295	0.99977	1.05894	1.00525	1.05822	0.98231	1.00989	0.95213	0.99578	1.05241	1.00402	0.97493	0.97912	0.98109	0.97822	0.97055	0.9744	1.08517	1.17595	1.00449	1.03015
72	1.03802	1.04266	1.02031	0.94172	0.98909	0.90427	1.00097	0.99334	1.14422	1.04528	1.03292	0.9634	0.99872	1.00599	1.03709	1.01617	0.9852	0.98566	1.02739	0.915	0.998	1.0353	1.02074	0.98595	1.05135	0.97826	0.90516	1.02562	1.00617	0.99459	1.03552	1.01453	1.06934	1.04844	0.9936	0.97657	1.04116	1.03184	0.98109	1.01487	1.00316	0.94476	0.99159	1.0722	0.98809	1.07905	1.02391	1.01593	0.98042
72.5	1.00065	1.01073	1.00434	0.95052	1.01126	0.9296	0.97725	1.02592	1.05269	0.96247	1.00807	0.95472	1.04805	0.98077	0.9628	0.97254	1.0452	1.00514	0.9891	0.96215	1.0159	0.94538	0.97325	1.00786	1.0651	1.00546	1.0838	0.99448	0.99149	1.01226	1.02047	1.04686	1.08675	1.03395	0.96797	0.95157	1.01291	0.98646	0.99126	0.99919	1.01822	0.97497	0.95632	0.95503	1.03622	1.05341	1.04085	0.98479	0.94761
73	1.04103	1.02996	0.96867	0.97735	0.98623	0.97248	0.99554	0.99868	0.92379	0.96711	1.01598	0.96924	1.01249	1.00393	0.99195	1.00981	0.94873	0.99248	1.00956	0.96535	1.04895	0.99339	0.98484	1.0125	1.02781	1.00602	0.98072	1.02701	0.97772	0.99577	1.03593	1.02614	1.05422	0.97659	1.02664	0.95927	1.02153	1.01475	1.00915	1.02934	0.96582	1.01596	0.98598	1.0089	1.00796	1.0155	1.00496	1.03586	1.01075
73.5	1.00686	1.08108	1.05079	0.98657	1.04298	0.94551	1.03631	0.96779	1.08157	0.98035	0.97408	0.96779	0.98903	0.9976	0.9696	0.95835	1.04706	0.97545	0.95974	1.01472	0.9951	1.0044	1.00842	0.98681	1.02386	0.99315	1.00581	0.96391	1.01213	0.99453	1.01869	0.96173	1.0412	0.97242	0.97947	0.95886	0.94777	1.02223	0.98162	0.99473	0.95072	1.02437	0.98533	1.00178	1.02332	1.05092	1.04247	1.01673	0.98308
74	1.01929	1.07244	1.09614	1.00701	1.01346	0.88866	0.99722	0.96482	0.95372	1.00797	1.00458	0.96916	1.02774	1.00093	1.03888	1.01757	0.99883	0.97106	0.97678	0.96393	1.00697	1.03692	0.98206	1.00948	1.01256	1.00521	0.96004	0.99802	0.96078	0.98401	1.04885	1.01072	1.0242	1.01196	1.0116	0.96018	1.00762	1.04093	1.00693	0.97656	1.02298	0.95834	0.99139	0.95459	0.98861	1.05593	1.06493	0.96572	1.0387
74.5	0.96865	1.01432	1.04495	0.94588	1.02282	0.9371	0.98039	1.03247	1.02112	1.01952	0.96158	0.89545	1.02634	0.98303	0.96672	1.03004	0.99812	1.00745	0.97449	0.97146	1.00998	0.98898	1.02284	1.04913	1.00363	0.97357	1.02389	0.98171	1.00066	1.00542	1.00749	1.00405	1.11827	1.0147	0.98621	0.96866	0.98231	1.01416	0.99098	0.99058	1.01931	0.98636	0.98879	1.01736	0.97114	1.01121	1.02667	0.99443	1.05549
75	0.96245	1.07576	0.9986	1.04048	0.99043	0.95786	0.96348	1.00046	1.03993	0.95894	1.06608	1.00471	1.04408	1.00727	1.02264	0.94266	1.02227	0.97992	1.01291	0.97205	0.99518	0.95243	0.97668	1.00233	1.02325	0.97371	1.0599	0.97836	0.98047	0.99478	1.00592	1.00532	1.03451	0.99437	1.01337	0.98181	1.00035	1.01469	1.04411	0.99928	0.9765	0.97452	1.00758	0.99446	0.98415	0.985	1.05693	0.97999	0.95371
75.5	0.9536	1.00105	1.09741	0.972	1.06723	0.95888	0.96631	1.00025	0.95461	1.01805	1.06324	0.94497	0.99585	0.99562	1.03313	0.99734	1.06677	0.98978	0.99408	0.98266	0.9973	0.963	1.01168	0.95844	0.96195	1.00326	1.06293	0.99715	0.96218	1.01433	1.0187	1.06003	1.02597	0.97246	0.987	1.00249	0.97329	0.9636	0.97884	0.96524	1.01658	0.97153	1.01192	0.99012	0.91422	1.07344	1.00761	1.01682	0.99117
76	0.95263	1.06852	1.05098	1.00594	1.05206	0.89912	1.00913	0.98525	1.00945	0.96162	1.04352	0.94661	1.01589	1.03114	0.9751	0.97285	0.99295	0.98093	1.00823	0.98926	1.01892	0.98924	1.01109	0.99863	1.06142	1.01441	1.03517	1.01905	0.99903	0.99684	0.999	0.93576	1.03511	1.04844	1.02171	0.97792	1.01223	1.01416	0.97175	0.9855	0.97681	1.01419	0.96442	1.02661	1.00831	1.02773	1.00251	0.98526	0.97743
76.5	0.89187	0.95273	0.89095	0.94933	0.99395	0.97258	0.9892	1.00905	1.06182	0.97002	1.01801	1.02073	0.93429	0.99099	1.03008	1.00494	1.01012	0.98956	0.99156	0.96353	0.9599	1.0027	1.02273	0.97253	0.99286	1.03483	1.06247	0.96917	0.99386	1.01861	0.99893	1.02193	1.01581	1.01689	1.02434	0.97675	0.98918	1.039	1.02905	0.9751	0.97514	0.9805	0.99779	0.9596	0.96372	1.04512	1.0457	1.00232	0.97078
77	0.90611	1.08592	1.0427	1.00791	1.0364	0.93104	0.9764	0.99981	1.05337	1.01842	1.0868	0.94614	1.08091	0.98376	0.98733	1.01123	1.03542	0.94699	0.98839	0.98513	0.99083	1.00285	1.01332	0.95762	1.00725	1.01944	0.92405	1.01096	0.97471	0.9938	1.0323	1.0205	1.00314	1.01686	0.9817	0.95931	0.95352	0.98686	0.96669	1.02597	0.99122	1.04244	1.0008	0.98994	0.96148	1.01121	1.08957	1.00948	0.9912
77.5	0.97736	0.95536	0.96549	0.99714	1.06898	0.93964	0.98593	1.0486	0.99225	1.01587	1.01192	0.99089	0.99406	1.00174	1.00331	0.93889	0.96397	1.02797	1.0231	0.97577	1.02084	0.99281	0.98531	1.00494	1.00063	1.02512	0.98937	1.00658	1.00317	1.00423	1.00964	0.97837	1.03694	1.07417	0.99984	1.01821	0.98789	0.98367	1.03955	0.99784	1.00395	0.9968	0.99303	0.98598	0.99735	1.00487	1.01125	1.01258	1.01287
78	0.96784	1.03289	1.00778	1.00064	0.95898	0.99885	0.99248	0.96573	0.9382	1.03747	1.0333	1.01775	0.95632	0.99003	0.99537	0.99989	0.99084	0.95802	1.02443	1.00683	0.98219	1.00399	0.99422	0.99207	0.98859	0.98022	0.94826	0.99848	0.9856	0.99125	0.98825	1.00652	0.99054	1.01356	1.00513	1.02625	1.03404	0.97606	0.94895	1.00801	0.96325	1.02546	1.01024	0.98759	1.02284	1.03205	0.99232	1.01071	0.97888
78.5	0.98445	1.04353	1.00585	1.0014	0.96112	1.03664	1.0202	0.98896	1.03986	0.96473	0.98346	0.9983	1.03137	1.01272	1.03104	1.00965	1.03768	1.00173	1.00405	0.99995	0.98696	0.98531	1.02401	1.00768	1.04809	0.99938	1.08208	1.00924	1.00666	0.99825	0.98544	1.05168	1.01621	0.95412	1.02174	0.95956	0.98902	1.00874	1.00339	0.99893	1.02873	0.96366	1.01105	0.98576	1.00688	0.95099	1.00826	0.99105	0.9942
79	1.07003	0.96792	1.02057	1.00051	1.0106	1.02456	1.00108	0.9964	1.02937	0.98161	0.97101	0.99274	1.01793	0.9952	0.96997	1.05125	1.00721	1.01197	0.9481	1.01714	1.0097	1.01758	0.99614	0.995	0.96237	0.99497	0.97999	0.98539	1.00426	1.00596	1.01636	0.96312	0.95599	0.95783	0.97298	0.99566	0.98874	1.03121	1.0078	0.9949	1.00376	1.01376	0.98537	1.04035	0.97262	1.01177	0.98786	0.98535	1.01374
79.5	0.92432	1.00932	1.01103	0.98555	1.0273	0.9803	0.99786	1.02371	1.01613	1.0036	1.07822	0.95424	0.99288	0.98937	1.02605	1.00373	1.03923	1.01155	0.97779	0.93416	1.00124	0.97466	0.9895	1.0166	1.04685	0.99251	0.99737	1.0108	0.98048	0.99755	1.04537	1.00956	0.98565	1.01703	0.99396	1.02991	1.05534	1.02918	1.00001	0.99262	0.97824	0.99141	0.98408	0.97693	1.00242	1.00675	1.01044	1.02806	0.99749
80	1.59692	2.00752	1.99742	2.1785	1.95593	1.29046	1.27183	2.11656	1.25326	1.71246	2.05867	2.05355	1.10052	1.16041	1.07675	1.77924	1.22397	0.99215	1.37781	0.81573	0.77234	0.82858	0.96443	1.14421	1.30529	1.54984	0.80004	0.8435	0.91788	0.64432	0.79843	0.96289	0.72968	0.97562	1.00854	0.95722	0.9929	0.97647	1.01324	0.9869	0.97146	0.97337	0.97394	0.95091	0.99424	0.97323	1.03964	0.99277	0.99476
80.5	3.63111	4.67841	5.22012	4.888	4.30893	4.51236	3.78268	6.60618	4.81272	4.35357	4.80254	4.99481	3.86028	4.7599	3.9947	5.34561	4.66602	3.67427	4.92234	1.9968	1.58023	1.99562	1.9888	3.1536	4.3776	4.66096	2.34622	3.60589	2.51786	1.86945	4.11539	3.99073	1.82958	0.39567	0.42316	0.47204	0.28765	0.57425	0.51811	0.36836	0.3655	0.42913	0.40089	0.46506	0.58489	0.45496	0.45057	0.6071	0.3553
81	3.70118	4.38543	5.0509	4.79258	4.25956	4.35259	3.70847	6.42951	4.82682	4.34141	4.83037	4.99174	4.09942	5.13862	4.23627	5.4074	4.87499	4.01254	5.1158	2.58989	1.98162	2.4655	2.56549	3.32126	4.56021	4.75874	3.16804	4.30726	2.7854	2.80086	4.82312	4.37373	2.14288	1.36804	1.31872	1.30944	0.9878	1.25198	1.05858	0.70781	0.86644	1.95204	1.82327	0.87077	1.37904	1.30793	1.22852	1.10196	0.94263
81.5	3.81827	4.64438	5.08473	4.84818	4.30214	4.35809	3.7272	6.31207	4.85885	4.28533	4.82483	4.97825	4.12604	5.23535	4.48801	5.39468	4.88956	4.07893	5.20564	2.91455	2.17904	2.81678	2.83353	3.45122	4.49459	4.77927	3.57566	4.50754	2.93427	3.07747	4.91104	4.24973	2.06841	1.47619	1.62528	1.57524	1.35664	2.04824	1.6383	1.16392	1.29705	1.88224	2.33863	1.50526	2.05408	2.47101	2.20099	1.60688	1.29785
82	3.73194	4.74381	5.08727	4.83986	4.40249	4.29269	3.58482	6.4376	4.99632	4.36307	4.83218	5.00239	4.16746	5.34383	4.58153	5.53184	4.92307	4.11121	5.32262	3.13836	2.31075	3.0838	3.14466	3.6309	4.65673	4.92489	3.7898	4.61459	2.95813	3.17966	5.00255	4.48643	2.16742	1.58928	1.66865	1.82357	1.68861	2.24189	1.91156	1.40413	1.58433	2.43706	2.90251	1.70291	2.34213	3.22215	2.74559	1.80152	1.5254
82.5	3.8069	4.7142	5.41498	4.89752	4.4475	4.48511	3.77443	6.72392	5.0125	4.31698	4.99253	5.14534	4.26556	5.44353	4.73587	5.65983	4.97241	4.15621	5.41874	3.31758	2.54234	3.2823	3.33225	3.68361	4.70877	5.07665	3.82388	4.65143	2.98685	3.2505	5.10878	4.46643	2.16168	2.25323	2.51804	2.55032	2.39503	3.16061	2.41296	1.73378	1.99029	3.03983	3.63907	2.12659	3.04307	3.6852	3.19319	2.15934	1.84256
83	3.90516	4.85162	5.22613	4.98385	4.50916	4.50624	3.82639	6.63656	4.93461	4.29047	4.86672	5.09887	4.2658	5.59783	4.9036	5.69705	5.0096	4.17221	5.53799	3.42973	2.5459	3.41478	3.41096	3.78765	4.86974	5.22809	3.97142	4.77988	3.02784	3.26753	5.14458	4.48611	2.1432	2.14523	2.46182	2.70219	2.06651	3.50703	2.53518	1.72757	1.99428	3.32657	3.81755	2.00786	3.17692	3.47594	3.19101	2.40031	1.85293
83.5	4.00081	4.8804	5.46416	4.95317	4.47181	4.58337	3.83599	6.70581	5.06293	4.46667	5.09043	5.29721	4.3856	5.66406	4.92327	5.68808	5.18655	4.26756	5.63692	3.52521	2.69563	3.41961	3.5052	3.85251	4.90856	5.25289	4.22196	4.85528	3.08731	3.38408	5.31278	4.5086	2.2647	2.46603	2.92836	3.21391	2.61048	3.9303	2.94412	1.94315	2.3689	3.71378	4.58356	2.16268	3.67376	4.18347	3.78156	2.6807	1.93842
84	3.95692	4.74157	5.70126	5.03672	4.44882	4.61354	3.81541	6.9423	5.19259	4.48359	4.92848	5.25505	4.41321	5.6934	4.92694	5.79755	5.18454	4.30718	5.82967	3.63762	2.8756	3.54989	3.64292	3.94621	4.97923	5.25316	4.07548	5.01671	3.10902	3.43768	5.4292	4.74257	2.30011	2.75932	3.05753	3.37265	2.81253	4.02595	2.98063	2.17216	2.50061	3.93456	4.70686	2.3466	3.83557	4.36901	3.73494	2.57734	2.11357
84.5	3.93564	4.90745	5.4863	5.03616	4.33371	4.59102	3.90208	6.84004	5.17324	4.5429	5.04897	5.21682	4.48008	5.78765	4.94448	5.78253	5.25562	4.28926	5.77214	3.75054	2.86058	3.61894	3.69487	3.89798	5.09274	5.37647	4.08128	5.01206	3.12598	3.47926	5.31988	4.65055	2.22044	3.0129	3.34014	3.63354	3.11738	4.62995	3.21541	2.41467	2.59653	4.0899	4.93538	2.68709	4.15989	4.67933	4.10169	2.88297	2.3078
85	3.86015	4.6687	5.38728	5.06434	4.43323	4.63801	3.88641	6.81999	5.09049	4.46742	4.93878	5.34333	4.46148	5.77983	4.98558	5.87082	5.25522	4.32584	5.76895	3.69524	2.85737	3.66786	3.75592	3.91506	5.0929	5.36363	4.13001	5.03411	3.12463	3.45501	5.37894	4.81001	2.3409	2.91431	3.25055	3.76789	2.91129	4.85608	3.45271	2.55596	2.74413	4.26903	5.19608	2.78122	4.37396	5.04404	4.62393	3.05865	2.17639
85.5	3.906	4.86467	5.4699	4.95928	4.46598	4.5891	3.86511	6.81469	5.0156	4.41852	5.00847	5.34633	4.54983	5.70448	5.02761	5.82598	5.28831	4.31462	5.73651	3.69303	2.85193	3.66584	3.69594	3.91459	5.09625	5.43009	4.33473	5.06816	3.11996	3.48696	5.43258	4.7034	2.26533	2.69152	3.13377	3.57417	2.7261	4.52073	3.12733	2.15727	2.57897	4.16049	5.01667	2.32792	4.30879	4.5721	4.48402	3.26521	2.00657
86	4.00687	4.71322	5.47191	4.96393	4.42289	4.60807	3.87265	6.84877	5.09306	4.486	4.901	5.29959	4.5015	5.77008	4.99919	5.72467	5.29765	4.32694	5.65992	3.83582	2.87244	3.64918	3.75563	3.89617	4.85169	5.4125	4.3916	5.09371	3.08036	3.4943	5.3821	4.78451	2.25243	2.67257	3.23372	3.65495	2.82873	4.24855	3.08328	1.89939	2.48396	4.17348	5.10521	2.22798	4.2043	4.39633	4.46466	3.29068	2.02457
86.5	3.89104	4.73778	5.33109	5.05477	4.595	4.65941	3.90201	6.92849	5.05833	4.40443	5.03201	5.23542	4.52877	5.86569	5.04859	5.75682	5.26219	4.35766	5.63146	3.82861	2.83936	3.6588	3.77614	3.89863	5.12967	5.37611	4.25572	5.10347	3.14076	3.49371	5.46911	4.67429	2.23241	2.92551	3.5406	3.94979	3.13273	4.7251	3.35316	2.20444	2.71652	4.24156	5.29864	2.63668	4.61675	5.03975	4.78054	3.21353	2.24063
87	3.9896	4.98805	5.59545	5.11019	4.53492	4.62412	3.90279	6.88116	5.08842	4.48892	5.06759	5.39995	4.54408	5.8098	4.97981	5.85463	5.21343	4.3877	5.66762	3.75266	2.91288	3.66111	3.73843	3.80533	5.21217	5.35436	4.34371	5.05735	3.11417	3.51183	5.41684	4.78985	2.23708	3.03032	3.66582	4.13631	3.33343	5.13925	3.54396	2.56366	2.89138	4.24008	5.5618	3.06776	4.7835	5.6505	4.98419	3.25271	2.34013
87.5	3.93976	4.8351	5.598	5.00271	4.577	4.62669	3.85943	6.95502	5.03003	4.46006	5.03632	5.35565	4.53451	5.71494	5.01794	5.95056	5.21917	4.35124	5.66363	3.75425	2.88056	3.69226	3.66014	3.90357	5.11203	5.41586	4.40935	5.1324	3.10682	3.47204	5.37295	4.67559	2.2106	3.04471	3.67887	4.10402	3.29898	5.21226	3.57328	2.51851	2.93115	4.27842	5.5962	3.1249	4.83241	5.83185	5.33832	3.31682	2.26735
88	4.00745	4.76592	5.54805	4.99994	4.45918	4.65854	3.80984	6.98027	5.02728	4.56653	4.97198	5.3319	4.56402	5.71767	4.96086	5.95142	5.21119	4.35154	5.64226	3.7834	2.88815	3.66475	3.71888	3.85565	5.0649	5.34505	4.43031	5.13819	3.06384	3.47859	5.38436	4.70365	2.20781	3.10826	3.65358	4.09036	3.19679	4.99497	3.60471	2.56686	2.87187	4.23689	5.65976	3.1059	4.79992	5.71319	5.35877	3.44279	2.30765
88.5	3.90337	4.72417	5.56772	5.08735	4.57006	4.63155	3.80265	6.84654	5.00394	4.38591	5.01102	5.26221	4.50773	5.72654	5.0032	5.93817	5.2958	4.34872	5.69509	3.7623	2.86796	3.71855	3.7169	3.82589	5.16248	5.41742	4.41247	5.16596	3.14737	3.50178	5.41497	4.73084	2.20766	2.95689	3.5647	4.01177	3.08048	4.99657	3.51653	2.37063	2.89146	4.33204	5.5389	2.85267	4.78092	5.38624	5.30865	3.66937	2.11049
89	3.99048	4.6502	5.56232	5.05358	4.52475	4.59478	3.83687	6.87877	4.87909	4.3987	5.0004	5.29582	4.60369	5.65106	5.01203	5.91777	5.12755	4.42276	5.51851	3.76934	2.89748	3.72591	3.71041	3.82817	5.11091	5.38106	4.2777	5.04701	3.13091	3.48438	5.36852	4.7963	2.16288	2.96586	3.4843	4.01862	2.94674	4.86267	3.48649	2.25306	2.83452	4.22839	5.46217	2.70164	4.70716	5.2189	5.27656	3.63814	2.11256
89.5	4.02044	4.67485	5.67916	4.97685	4.44968	4.52996	3.66726	6.79712	4.97211	4.35397	4.90093	5.28323	4.54332	5.62533	4.91161	5.92658	5.16316	4.40394	5.59367	3.82681	2.90188	3.70082	3.66927	3.80348	5.13796	5.43808	4.30406	5.14625	3.13535	3.49147	5.35752	4.71735	2.18113	2.92349	3.45616	3.97813	2.97006	4.75052	3.14103	2.14524	2.76169	4.16949	5.45341	2.57673	4.66311	5.14374	5.1335	3.51288	2.15566
90	3.91901	4.84251	5.76559	5.08381	4.41677	4.62998	3.64922	6.62723	4.8076	4.30209	4.90471	5.19614	4.50548	5.58667	4.8416	5.81998	5.13868	4.34525	5.47275	3.77729	2.88513	3.59237	3.67612	3.82996	5.12937	5.48256	4.46202	5.1007	3.08888	3.42835	5.28371	4.63047	2.24697	3.00319	3.46457	3.98441	2.99727	4.67105	3.03661	2.05774	2.75398	4.20337	5.43411	2.58263	4.52209	5.077	4.97184	3.31877	2.16955
Results from Student's t-test
relative FNH4Cl
p_two_tail	0.811353
[truncated: 24 more columns]

## Sheet: 7H
Data related to Figure 7H: 2/3rd of DF caused by NH4Cl (DFNH4Cl) and DF400APs without or with AM251
control	Exp #1	#2	#3	#4	#5	#6	#7	#8	#9	#10	#11	#12	#13	#14	#15	#16	#17	#18	#19	#20	#21	#22	#23	#24	#25	#26	#27	#28	#29	#30	#31	#32	#33	#34	#35	#36	#37	#38	#39	#40	#41	#42	#43	#44	#45	#46	#47	#48	#49
(DFNH4Cl)2/3 (A.U.)	34.0463	62.3803	39.7205	47.5922	26.3421	49.0362	48.4925	46.6641	72.1504	71.5977	48.1073	78.2218	94.646	56.3124	60.5118	46.2506	55.2527	31.0645	40.8368	69.0129	72.0314	64.2668	58.0011	38.1421	34.7527	45.2502	43.5624	54.1693	16.0803	43.3716	48.2041	46.9601	59.2222	55.555	66.7588	102.605	60.9381	68.9906	56.4208	125.092	74.0479	88.993	90.3081	170.741	144.167	140.144	58.5504	86.5661	111.987
DF400APs (A.U.)	30.85	44.1994	42.3319	40.9	27.8644	30.4294	28.3675	64.4119	40.2025	50.46	39.7175	60.47	108.425	41.8856	55.0894	23.84	39.3862	25.62	47.8675	47.6681	100.142	61.2625	29.595	20.3825	36.1706	47.2925	39.6281	30.975	19.4575	60.885	74.3625	37.4925	50.2575	76.915	39.7825	99.885	57.6225	63.5825	90.06	184.165	100.695	66.175	111.62	113.93	175.76	151.145	111.347	72.8	199.41
AM251	Exp #1	#2	#3	#4	#5	#6	#7	#8	#9	#10	#11	#12	#13	#14	#15	#16	#17	#18	#19	#20	#21	#22	#23	#24	#25	#26	#27	#28	#29	#30	#31	#32	#33	#34	#35	#36	#37	#38	#39	#40	#41	#42	#43	#44	#45	#46	#47	#48	#49
(DFNH4Cl)2/3 (A.U.)	38.7597	52.0862	58.4922	97.9663	47.3135	61.2683	72.1949	101.874	53.5939	53.8514	58.6963	61.214	46.434	60.2886	70.1458	53.5177	78.8657	102.126	93.9406	77.308	142.592	82.7145	81.5688	54.6434	88.7294	101.913	58.8526	135.094	100.527	136.856	152.804	138.758	67.5909	83.1643	67.334	58.6408	63.9046	90.3679	17.5099	31.1858	46.0197	31.0152	57.6678	58.5356	63.838	43.8596	62.5528	67.638	97.0738
DF400APs (A.U.)	24.93	18.0225	16.5475	43.42	18.195	35.01	23.9325	42.9675	24.0825	25.52	28.5825	27.48	21.935	24.7425	32.0525	23.925	38.8925	41.9975	43.0925	39.0425	84.67	58.765	34.465	39.0575	61.7375	41.7725	25.7575	68.2625	47.9875	57.345	37.35	70.8575	26.55	32.0025	27.1075	37.625	29.28	36.34	14.365	27.765	31.38	11.905	44.7925	38.58	41.295	24.6275	34.86	14.9325	33.305
[truncated: 55 more columns]

## Sheet: Figure 7-figure supplement 1B
Data related to Figure S5B: amplitudes of Na+ current before and after application of AM251
amplitudes of Na+ current (nA)
Exp #	before	after AM251
1	2.462	2.322
2	9.147	8.998
3	3.593	4.211
4	4.163	4.052
5	5.992	5.5
6	3.669	3.695
7	6.254	5.767
8	3.489	3.85
N	8	8
Average	4.846	4.799
SEM	0.765	0.71
Results from paired t-test
(amplitudes of Na+ current) before vs after AM251
p_two_tail	0.741304
