# Supplementary material for: Increased reluctant vesicles underlie synaptic depression by GPR55 in axon terminals of rat cerebellar Purkinje cells
Source: eLife. 2026 Apr 7;14:RP105268. doi: 10.7554/eLife.105268 (PMC13056361; doi:10.7554/eLife.105268)
Supplement: Figure 8—source data 1. [file elife-105268-fig8-data1.xlsx]

## Sheet: 8A
Data related to Figure 8A: synapto-pHluorin fluorescence changes upon the repetitive 400 APs trains before and after the application of bafilomycin and KCl followed by the NH4Cl application in the presence or absence of AM251
rerative DF	control
sec	Exp #1	#2	#3	#4	#5	#6	#7	#8	#9	#10	#11	#12	#13		N	Average	SEM
-90	-0.00634	0.0206	0.01348	-0.01182	-0.01652	0.0212	-0.0137	-0.0111	-0.00945	-0.01285	-0.0184	-0.01157	-0.00252		13	-0.00454	0.00383
-89.5	-0.00225	0.0134	-0.00032	-0.01064	-0.01327	-0.01869	-0.02693	-0.01155	-0.01315	-0.00387	0.00151	0.00095	-0.00439		13	-0.00686	0.00287
-89	-0.01704	0.01034	0.01466	-0.01546	-0.01698	-0.00857	-0.01962	-0.01306	-0.02022	0.00153	-0.00036	-0.00022	-0.00397		13	-0.00684	0.00319
-88.5	-0.01079	0.01966	0.02339	-0.00925	-0.03032	-0.01677	-0.01126	-0.00849	-0.01433	0.01062	0.00454	0.00285	-0.00873		13	-0.00376	0.00422
-88	0.01	0.01985	0.02293	-0.01114	0.00252	-0.01744	-0.01903	-0.00949	-0.00585	0.00528	-0.00193	-0.00122	-0.00489		13	-0.0008	0.00357
-87.5	-0.01666	0.02468	-0.00059	-0.01237	-0.02369	-0.00379	-0.00835	-0.01374	-0.01779	0.02167	-0.00676	-0.00425	-0.00658		13	-0.00525	0.00393
-87	-0.01778	0.01496	0.03076	-0.01197	-0.01684	-0.003	-0.00895	-0.01023	-0.02127	-0.0037	0.00706	0.00444	-0.01517		13	-0.00398	0.00414
-86.5	-0.01266	0.02796	0.01251	-0.01283	-0.02028	-0.01367	-0.00306	-0.01191	-0.00982	0.00426	0.01079	0.00679	-0.00026		13	-0.0017	0.0038
-86	-0.01066	0.03092	0.01848	-0.01556	-0.02131	-0.00278	-0.02605	-0.01138	-0.01934	0.01326	-0.00468	-0.00295	0.00024		13	-0.00398	0.0046
-85.5	-0.01206	0.02384	0.01202	-0.01213	-0.0057	0.00794	-0.02235	-0.01265	-0.01384	0.00931	0.0112	0.00704	0.00088		13	-0.0005	0.00376
-85	-0.00238	0.02185	0.00578	-0.00552	-0.0327	-0.00858	-0.00734	-0.0136	-0.01529	0.00425	-0.01013	-0.00637	-0.02107		13	-0.00701	0.00369
-84.5	-0.00062	0.00996	0.00858	-0.0101	-0.0212	-0.00106	-0.0193	-0.01421	-0.00738	0.00736	0.00167	0.00105	-0.01284		13	-0.00447	0.00291
-84	0.00638	0.02013	0.00855	-0.01853	-0.01317	-0.00036	-0.02262	-0.0117	-0.00478	0.00617	-0.02156	-0.01356	-0.00582		13	-0.00545	0.00362
-83.5	-0.0207	0.019	0.00166	-0.01515	-0.015	-0.00301	-0.01912	-0.01424	-0.01147	0.00279	-0.01369	-0.00861	-0.00931		13	-0.00822	0.00303
-83	0.0016	0.02222	0.00497	-0.01202	0.00341	0.0042	-0.0114	-0.01382	-0.01481	0.02051	-0.01137	-0.00715	-0.0203		13	-0.00261	0.00372
-82.5	-0.00945	0.02126	0.01621	-0.01145	-0.00983	0.00283	-0.0176	-0.01422	-0.01343	0.00568	0.00702	0.00442	0.00303		13	-0.00119	0.00342
-82	0.00147	0.0183	0.00893	-0.02194	-0.00136	-0.02511	-0.00898	-0.0118	-0.00569	0.01374	0.0123	0.00774	0.01089		13	-0.00012	0.00384
-81.5	-0.01707	0.0213	0.00157	-0.01157	-0.02216	-0.03037	-0.0234	-0.01457	-0.00957	0.0164	-0.00728	-0.00458	0.00278		13	-0.00758	0.0042
-81	-0.00363	0.00431	0.01395	-0.0138	-0.01549	-0.01816	-0.00899	-0.01247	0.00725	0.01115	-0.00372	-0.00234	0.01151		13	-0.00234	0.00308
-80.5	-0.01944	0.01173	0.00214	-0.01049	-0.01856	-0.01512	-0.01453	-0.01283	-0.0044	0.00751	-0.0091	-0.00572	-0.00753		13	-0.00741	0.00267
-80	-0.01463	0.00758	0.00196	-0.0088	-0.02779	-0.02195	-0.01312	-0.01348	-0.00317	0.01445	-0.01128	-0.00709	-0.0002		13	-0.0075	0.00323
-79.5	-0.0102	0.03358	0.00499	-0.01858	-0.01525	-0.02541	-0.00989	-0.01676	-0.01536	0.01516	-0.00239	-0.0015	-0.00819		13	-0.00537	0.0044
-79	-0.0131	0.02732	-0.00172	-0.00783	-0.01627	-0.02095	-0.01055	-0.01283	-0.01594	0.02491	-0.01017	-0.0064	-0.00913		13	-0.00559	0.00413
-78.5	-0.01335	0.04348	0.03837	-0.0109	-0.00828	0.00215	-0.01003	-0.00323	-0.00439	0.02738	0.00449	0.00282	-0.01191		13	0.00435	0.00539
-78	-0.00554	0.05668	0.02216	-0.00646	-0.01929	-0.01303	-0.00222	-0.00016	-0.00945	0.02604	-0.01243	-0.00781	0.00065		13	0.00224	0.0058
-77.5	-0.0169	0.06926	0.0158	-0.00832	-0.00174	-0.01142	-0.00149	-0.00504	0.00957	0.03887	0.00092	0.00058	0.01352		13	0.00797	0.00647
-77	-0.01156	0.07089	0.04367	-0.00604	-0.0218	-0.00905	0.00204	-0.00238	-0.01974	0.04193	-0.01781	-0.0112	-0.01043		13	0.00373	0.00808
-76.5	0.00064	0.0741	0.02399	0.00478	0.00363	-0.00351	0.00612	0.00087	-0.00161	0.04448	0.00328	0.00207	0.00047		13	0.01226	0.0063
-76	0.00802	0.06489	0.02563	-0.00276	-0.00491	0.00373	0.01084	0.00156	0.00339	0.06082	-0.00016	-0.0001	0.01093		13	0.01399	0.0064
-75.5	-0.00484	0.06608	0.06107	0.01052	0.01907	0.00457	0.0044	0.01017	-0.00426	0.05432	0.00912	0.00573	0.0126		13	0.01912	0.00681
-75	0.02957	0.08238	0.0538	0.01997	0.01062	0.00431	0.01175	0.01107	0.0094	0.0601	1e-05	1e-05	-0.00094		13	0.02247	0.00738
-74.5	-0.00262	0.07369	0.05712	0.02122	0.02411	0.03814	0.00853	0.02044	0.01117	0.05468	0.01731	0.01088	0.00136		13	0.02585	0.00647
-74	0.00698	0.09078	0.05828	0.02023	0.03081	0.01799	0.00079	0.0194	0.01763	0.04653	0.01348	0.00848	0.00624		13	0.02597	0.00705
-73.5	0.01459	0.10292	0.06542	0.01727	0.02104	0.0234	0.03166	0.02227	0.0095	0.05913	0.01922	0.01209	0.00307		13	0.03089	0.00784
-73	0.02576	0.09584	0.0632	0.02574	0.0504	0.00899	0.03437	0.0249	0.01997	0.06182	0.0039	0.00245	0.00572		13	0.03254	0.00778
-72.5	0.01757	0.09033	0.06161	0.02341	0.03031	0.02321	0.01948	0.02775	0.01939	0.06451	-0.00172	-0.00108	0.01139		13	0.02971	0.00743
-72	0.01405	0.1011	0.05621	0.02961	0.03812	0.03311	0.03894	0.02482	0.02232	0.06761	0.02629	0.01653	0.00159		13	0.03618	0.00723
-71.5	0.03939	0.11013	0.07205	0.02751	0.0333	0.04044	0.03166	0.02408	0.03115	0.06627	0.01378	0.00867	0.02192		13	0.04003	0.00769
-71	0.03152	0.11309	0.07844	0.03699	0.06256	0.06126	0.03307	0.04189	0.02463	0.07462	-0.00529	-0.00333	0.01626		13	0.04352	0.00936
-70.5	0.0477	0.09428	0.07104	0.04001	0.06586	0.06259	0.04277	0.0375	0.03781	0.06727	0.01815	0.01141	-0.00915		13	0.04517	0.00771
-70	0.0596	0.11804	0.07625	0.0491	0.0815	0.05909	0.04032	0.04151	0.0404	0.07828	-0.01342	-0.00844	0.01603		13	0.0491	0.01017
-69.5	0.04345	0.11704	0.10568	0.03395	0.06184	0.05782	0.04169	0.04177	0.03401	0.06831	0.0201	0.01264	0.01352		13	0.05014	0.00893
-69	0.0309	0.12264	0.08322	0.04088	0.07801	0.06923	0.05391	0.04455	0.02129	0.08837	0.02462	0.01548	0.00897		13	0.05247	0.00939
-68.5	0.06485	0.12017	0.09481	0.04829	0.06554	0.07576	0.04449	0.05267	0.04218	0.10008	0.02649	0.01666	0.0199		13	0.05938	0.00881
-68	0.06223	0.12348	0.09666	0.04707	0.09896	0.07129	0.05807	0.05249	0.05184	0.08491	0.02706	0.01702	0.01011		13	0.06163	0.00924
-67.5	0.06667	0.12687	0.10734	0.06193	0.0948	0.06364	0.06164	0.05643	0.04868	0.07439	0.01707	0.01074	0.01011		13	0.06156	0.00983
-67	0.05462	0.12189	0.07829	0.0656	0.09023	0.07498	0.06199	0.05264	0.05653	0.0932	0.02686	0.01689	0.02634		13	0.06308	0.0082
-66.5	0.04635	0.12342	0.08927	0.06053	0.10552	0.09522	0.07107	0.05985	0.0543	0.06743	0.03137	0.01973	0.0111		13	0.06424	0.00919
-66	0.06029	0.13836	0.0974	0.06664	0.11204	0.09467	0.07536	0.06279	0.04889	0.09575	0.03676	0.02312	0.02816		13	0.07232	0.0095
-65.5	0.0733	0.13306	0.07692	0.067	0.10588	0.101	0.07175	0.06084	0.0538	0.09395	0.02406	0.01513	0.0163		13	0.06869	0.00987
-65	0.06653	0.12997	0.10678	0.07828	0.13093	0.1	0.08302	0.06367	0.05654	0.09216	0.02967	0.01866	-0.0052		13	0.07315	0.01141
-64.5	0.0688	0.12598	0.11587	0.07101	0.12828	0.10131	0.07689	0.06976	0.0655	0.08232	0.02243	0.0141	0.01028		13	0.07327	0.01093
-64	0.07506	0.12428	0.08744	0.07036	0.12412	0.10931	0.0786	0.06851	0.0755	0.09747	0.02994	0.01883	0.01551		13	0.07499	0.00996
-63.5	0.06	0.13298	0.10181	0.0707	0.13676	0.11277	0.09557	0.07294	0.06015	0.10105	0.02465	0.01551	0.00313		13	0.076	0.01191
-63	0.07124	0.13377	0.10551	0.07545	0.11691	0.10784	0.08316	0.07526	0.08483	0.09755	0.03462	0.02177	0.02476		13	0.07944	0.00969
-62.5	0.0719	0.12856	0.10098	0.08263	0.1087	0.13244	0.0887	0.07174	0.0817	0.10285	0.04011	0.02522	0.02172		13	0.08133	0.00983
-62	0.08918	0.14301	0.12162	0.08324	0.14208	0.10496	0.10124	0.0796	0.07235	0.11401	0.01893	0.0119	0.01819		13	0.08464	0.01236
-61.5	0.08611	0.15624	0.09598	0.0846	0.13777	0.11727	0.08554	0.07848	0.06548	0.10538	0.02407	0.01514	0.02729		13	0.08303	0.0118
-61	0.09083	0.14864	0.13577	0.07715	0.14668	0.13445	0.09652	0.08185	0.07741	0.09453	0.02768	0.01741	0.02464		13	0.08873	0.01255
-60.5	0.07633	0.12765	0.10053	0.0838	0.14503	0.11997	0.09267	0.08513	0.09003	0.10178	0.04327	0.02721	0.01615		13	0.08535	0.01049
-60	0.08012	0.12338	0.10228	0.08127	0.14789	0.13591	0.1082	0.0835	0.07934	0.11023	0.05385	0.03387	0.01126		13	0.08855	0.01087
-59.5	0.07978	0.13921	0.10428	0.08651	0.172	0.14064	0.09854	0.08074	0.08356	0.1088	0.02969	0.01867	0.01399		13	0.08896	0.01317
-59	0.08949	0.13723	0.11251	0.08401	0.13992	0.13333	0.10653	0.08055	0.08377	0.0919	0.03001	0.01887	0.03199		13	0.0877	0.01118
-58.5	0.05631	0.13068	0.09434	0.0826	0.13131	0.14118	0.1012	0.08747	0.08351	0.10018	0.02975	0.01871	0.02417		13	0.08319	0.0113
-58	0.07124	0.11398	0.10613	0.07993	0.14257	0.11181	0.11182	0.07934	0.07513	0.07939	0.04799	0.03018	0.01686		13	0.08203	0.00991
-57.5	0.08834	0.11025	0.11134	0.08879	0.13084	0.13143	0.09522	0.07315	0.07035	0.09704	0.05714	0.03594	0.01666		13	0.08511	0.0095
-57	0.06585	0.11136	0.09305	0.0876	0.15145	0.13986	0.10057	0.08205	0.07396	0.0825	0.03869	0.02434	0.02661		13	0.08291	0.01078
-56.5	0.05165	0.12064	0.09865	0.07968	0.13058	0.11325	0.09767	0.07656	0.08276	0.09024	0.03482	0.0219	0.02105		13	0.07842	0.01005
-56	0.0639	0.11124	0.10042	0.07417	0.12956	0.10009	0.08918	0.07656	0.08368	0.08984	0.03118	0.01961	0.02046		13	0.07615	0.00952
-55.5	0.06758	0.10166	0.0806	0.08047	0.12532	0.12539	0.10879	0.0731	0.06917	0.0918	0.03297	0.02074	0.03047		13	0.07754	0.00946
-55	0.0732	0.11505	0.10387	0.07585	0.13499	0.13784	0.10883	0.06896	0.07302	0.09436	0.04531	0.02849	0.04762		13	0.08518	0.00947
-54.5	0.03516	0.09559	0.09261	0.08137	0.14603	0.11247	0.0957	0.073	0.08319	0.10501	0.03409	0.02144	0.02961		13	0.07733	0.01036
-54	0.06639	0.09949	0.0791	0.06904	0.12901	0.12785	0.09548	0.07233	0.07708	0.07909	0.03944	0.0248	0.03342		13	0.07635	0.00891
-53.5	0.07654	0.10768	0.08348	0.07172	0.13129	0.12453	0.09442	0.07826	0.07309	0.08692	0.04899	0.03081	0.01357		13	0.07856	0.00932
-53	0.08104	0.09326	0.07999	0.07146	0.1325	0.11978	0.09491	0.06635	0.08514	0.0987	0.0421	0.02648	0.02739		13	0.07839	0.00892
-52.5	0.06323	0.0852	0.07946	0.06892	0.12091	0.10763	0.08121	0.06982	0.06583	0.07966	0.02604	0.01638	0.0203		13	0.06805	0.00871
-52	0.03894	0.09062	0.05878	0.06946	0.12603	0.1259	0.09473	0.07213	0.06345	0.08279	0.03186	0.02003	0.01409		13	0.06837	0.01001
-51.5	0.07135	0.09464	0.07217	0.06715	0.12413	0.12271	0.08054	0.07612	0.06718	0.08534	0.05895	0.03707	0.03765		13	0.07654	0.00735
-51	0.0583	0.0935	0.07178	0.07259	0.12948	0.12829	0.09022	0.06968	0.06101	0.06768	0.02409	0.01515	0.03173		13	0.07027	0.00971
-50.5	0.05907	0.09931	0.07815	0.07516	0.11835	0.11793	0.08381	0.06406	0.06369	0.08151	0.04929	0.031	0.02085		13	0.07248	0.00816
-50	0.04952	0.09134	0.08122	0.07549	0.12222	0.10078	0.07557	0.0673	0.05324	0.07157	0.03457	0.02174	0.04179		13	0.06818	0.00775
-49.5	0.04324	0.08949	0.05633	0.06987	0.12188	0.09556	0.09182	0.07037	0.07442	0.08237	0.06885	0.0433	0.02799		13	0.07196	0.00703
-49	0.04432	0.0896	0.07529	0.0735	0.14308	0.09586	0.09655	0.06928	0.06106	0.07802	0.04968	0.03124	0.05004		13	0.07365	0.00804
-48.5	0.05949	0.08513	0.0506	0.06388	0.13892	0.11307	0.08532	0.06509	0.07796	0.06361	0.05232	0.03291	0.03196		13	0.07079	0.00834
-48	0.06816	0.08144	0.07127	0.07454	0.10907	0.10134	0.09193	0.06399	0.06419	0.07455	0.04704	0.02958	0.02165		13	0.06913	0.00704
-47.5	0.06111	0.06881	0.08723	0.06526	0.13117	0.08847	0.0897	0.06834	0.06514	0.0731	0.03949	0.02484	0.01589		13	0.06758	0.00829
-47	0.0529	0.07539	0.07371	0.0651	0.11981	0.12463	0.07785	0.06242	0.06464	0.0594	0.03181	0.02001	0.03605		13	0.06644	0.00841
-46.5	0.05251	0.08453	0.07734	0.06971	0.13009	0.09357	0.08649	0.06189	0.07137	0.06492	0.04438	0.02791	0.03022		13	0.06884	0.00764
-46	0.0629	0.07838	0.06998	0.06597	0.12442	0.0962	0.09182	0.06258	0.06951	0.07363	0.03661	0.02302	0.0231		13	0.06755	0.00791
-45.5	0.04388	0.07434	0.096	0.06476	0.11267	0.0983	0.08963	0.06051	0.07139	0.08568	0.03634	0.02285	0.00962		13	0.06661	0.00862
-45	0.03328	0.06098	0.07272	0.06844	0.12045	0.09004	0.07982	0.0607	0.07033	0.06766	0.02876	0.01809	0.01882		13	0.06078	0.0082
-44.5	0.03921	0.07555	0.07599	0.06231	0.12581	0.08507	0.08471	0.06061	0.05197	0.07467	0.01826	0.01148	0.01447		13	0.06001	0.00911
-44	0.05155	0.08448	0.06866	0.06919	0.11842	0.09431	0.09093	0.05977	0.05731	0.07055	0.0297	0.01868	0.02609		13	0.06459	0.00801
-43.5	0.06151	0.07747	0.08888	0.06422	0.11672	0.09599	0.10063	0.07204	0.04963	0.06986	0.04685	0.02946	0.02432		13	0.06905	0.00759
-43	0.05677	0.06235	0.05981	0.05597	0.12347	0.10225	0.08436	0.05787	0.0617	0.06632	0.03017	0.01897	0.01989		13	0.06153	0.00826
-42.5	0.04235	0.07019	0.06304	0.06035	0.09988	0.10082	0.08285	0.06355	0.06277	0.05693	0.03951	0.02485	0.03528		13	0.06172	0.00644
-42	0.05763	0.0744	0.06345	0.0606	0.09805	0.08605	0.08947	0.06563	0.05805	0.08584	0.04442	0.02794	0.02277		13	0.06418	0.00638
-41.5	0.04971	0.05764	0.05977	0.05763	0.10608	0.09321	0.08296	0.05707	0.06413	0.05908	0.03849	0.02421	0.03211		13	0.06016	0.00641
-41	0.06383	0.06072	0.07434	0.06482	0.14261	0.09058	0.07767	0.05745	0.04559	0.07803	0.03672	0.02309	0.02017		13	0.06428	0.00881
-40.5	0.03477	0.06	0.0818	0.0621	0.10605	0.08158	0.08309	0.05755	0.04705	0.06195	0.04055	0.0255	0.04797		13	0.06077	0.00626
-40	0.04657	0.07164	0.07	0.05988	0.12538	0.09262	0.09256	0.06346	0.05118	0.06662	0.03518	0.02212	0.02558		13	0.06329	0.00802
-39.5	0.04959	0.05787	0.0745	0.0721	0.13292	0.07738	0.0874	0.06163	0.04832	0.07488	0.02875	0.01808	0.03994		13	0.06334	0.00808
-39	0.04719	0.05645	0.08076	0.05872	0.10405	0.08177	0.08047	0.05916	0.04952	0.07168	0.02057	0.01293	0.03399		13	0.05825	0.0072
-38.5	0.05562	0.0515	0.05427	0.06172	0.12658	0.09242	0.0874	0.0668	0.04118	0.05833	0.03075	0.01934	0.02607		13	0.05938	0.00817
-38	0.04577	0.07129	0.06541	0.06122	0.10486	0.08857	0.0772	0.06265	0.04049	0.05052	0.03751	0.02359	0.02742		13	0.05819	0.00661
-37.5	0.04084	0.05464	0.07009	0.06018	0.10385	0.07968	0.07476	0.0574	0.05825	0.0545	0.0319	0.02006	0.01626		13	0.05557	0.00675
-37	0.06261	0.06271	0.0897	0.06358	0.10675	0.08495	0.07591	0.05848	0.0492	0.05429	0.03313	0.02084	0.02687		13	0.06069	0.00692
-36.5	0.03991	0.04653	0.06315	0.06057	0.11659	0.08646	0.08296	0.05903	0.05267	0.03857	0.04111	0.02586	0.03326		13	0.05744	0.00702
-36	0.04686	0.06017	0.0669	0.05025	0.09485	0.06996	0.06992	0.06472	0.0431	0.05391	0.02847	0.0179	0.02784		13	0.05345	0.00584
-35.5	0.02029	0.0576	0.04907	0.06335	0.11737	0.08843	0.0643	0.06355	0.05362	0.05746	0.04231	0.02661	0.03716		13	0.05701	0.00704
-35	0.04792	0.04528	0.05699	0.04542	0.09409	0.07609	0.08473	0.05977	0.05267	0.04225	0.0238	0.01497	0.02653		13	0.05158	0.00647
-34.5	0.03498	0.05619	0.06607	0.06303	0.1011	0.06974	0.07639	0.05381	0.05092	0.05407	0.01904	0.01198	0.02205		13	0.05226	0.00695
-34	0.05312	0.05115	0.04848	0.05496	0.12304	0.06638	0.06659	0.05688	0.04858	0.04629	0.04189	0.02634	0.02264		13	0.05433	0.00675
-33.5	0.05207	0.04575	0.0536	0.06444	0.11511	0.07751	0.06723	0.06269	0.03363	0.04565	0.01931	0.01215	0.01747		13	0.05128	0.00776
-33	0.03765	0.0408	0.06846	0.06216	0.12229	0.09404	0.082	0.05099	0.03312	0.03402	0.01573	0.0099	0.02138		13	0.05173	0.00914
-32.5	0.05676	0.04804	0.0827	0.06228	0.12372	0.08308	0.08808	0.05934	0.03415	0.05155	0.04109	0.02584	0.025		13	0.06013	0.00782
-32	0.03468	0.05694	0.07044	0.05742	0.10742	0.0802	0.05722	0.05897	0.02948	0.04953	0.03391	0.02132	0.00544		13	0.051	0.00741
-31.5	0.03579	0.04699	0.05557	0.06305	0.133	0.07424	0.07262	0.06178	0.03174	0.04054	0.03135	0.01972	0.02979		13	0.05355	0.00819
-31	0.05267	0.03767	0.0658	0.04744	0.10141	0.06688	0.07782	0.05918	0.02971	0.04947	0.03346	0.02104	0.03345		13	0.052	0.00617
-30.5	0.02987	0.03793	0.05738	0.05807	0.0946	0.07766	0.07186	0.06171	0.03363	0.0442	0.03095	0.01947	0.02455		13	0.04938	0.00634
-30	0.03476	0.05463	0.04321	0.06398	0.08624	0.08009	0.0644	0.05075	0.01853	0.0498	0.02444	0.01537	0.01578		13	0.04631	0.00658
-29.5	0.04312	0.04189	0.07524	0.05552	0.08888	0.07418	0.07089	0.05718	0.04443	0.04779	0.02545	0.016	0.01836		13	0.05069	0.00628
-29	0.02172	0.01591	0.06068	0.05693	0.10317	0.07644	0.08215	0.05422	0.03051	0.05154	0.02522	0.01586	0.02495		13	0.04764	0.00777
-28.5	0.02528	0.03461	0.05276	0.05018	0.09448	0.06885	0.07052	0.05544	0.04139	0.04428	0.04422	0.02781	0.02037		13	0.04848	0.00573
-28	0.03573	0.05402	0.05728	0.05828	0.09826	0.07545	0.07856	0.05734	0.04165	0.04527	0.02261	0.01422	0.02111		13	0.05075	0.00676
-27.5	0.05396	0.03958	0.06072	0.04876	0.09286	0.07784	0.06937	0.05315	0.0379	0.02702	0.03463	0.02178	0.02527		13	0.04945	0.00597
-27	0.04219	0.01882	0.05168	0.05597	0.07639	0.06277	0.07111	0.05975	0.02927	0.03482	0.01355	0.00852	0.02917		13	0.04262	0.00615
-26.5	0.02768	0.03777	0.04821	0.05133	0.10265	0.06803	0.06962	0.05734	0.03379	0.05164	0.01356	0.00853	0.03021		13	0.04618	0.00703
-26	0.01198	0.0145	0.04483	0.0561	0.10952	0.04867	0.07477	0.05837	0.02677	0.04656	0.0411	0.02585	0.03103		13	0.04539	0.00729
-25.5	0.03023	0.03936	0.06911	0.05512	0.0964	0.06317	0.07156	0.0547	0.02514	0.03874	0.01481	0.00932	0.03838		13	0.04662	0.00686
-25	0.01515	0.02847	0.05192	0.05194	0.1076	0.06676	0.07228	0.05688	0.0282	0.03781	0.03646	0.02293	-0.00124		13	0.04424	0.00783
-24.5	0.04286	0.03602	0.04702	0.05196	0.10579	0.06674	0.07238	0.055	0.03461	0.03374	0.00525	0.0033	0.01969		13	0.04418	0.00774
-24	0.02579	0.02509	0.04818	0.04049	0.10256	0.06282	0.08342	0.05364	0.02888	0.04573	0.05433	0.03417	0.02674		13	0.0486	0.00651
-23.5	0.03664	0.01262	0.03788	0.04691	0.09723	0.06156	0.07136	0.05199	0.03309	0.03861	0.03356	0.0211	0.01683		13	0.04303	0.00648
-23	0.0404	0.00925	0.04682	0.04696	0.11676	0.0478	0.06416	0.05437	0.02669	0.03312	0.0321	0.02019	0.02418		13	0.04329	0.00741
-22.5	0.02295	0.02355	0.03893	0.04859	0.08249	0.05053	0.06844	0.05527	0.03887	0.04347	0.03021	0.019	0.01684		13	0.04147	0.00546
-22	0.02487	0.01292	0.04793	0.05295	0.10385	0.0539	0.07462	0.05005	0.02213	0.04469	0.03353	0.02109	0.01889		13	0.04319	0.00708
-21.5	0.02637	0.02222	0.03149	0.0461	0.09913	0.0618	0.07055	0.05207	0.02155	0.04059	0.03045	0.01915	0.01363		13	0.04116	0.0068
-21	0.0161	0.0238	0.0575	0.05501	0.09601	0.04315	0.08481	0.0547	0.03243	0.03518	0.04176	0.02627	0.03803		13	0.04652	0.00644
-20.5	0.02353	-0.00034	0.0273	0.04845	0.11656	0.05596	0.07586	0.04993	0.02604	0.02617	0.02282	0.01435	0.03055		13	0.03978	0.00842
-20
-19.5
-19
-18.5
-18
-17.5
-17
-16.5
-16
-15.5
-15
-14.5
-14
-13.5
-13
-12.5
-12
-11.5
-11
-10.5
-10
-9.5
-9
-8.5
-8
-7.5
-7
-6.5
-6
-5.5
-5
-4.5
-4
-3.5
-3
-2.5
-2
-1.5
-1
-0.5
0	-0.01845	0.0017	-0.0096	0.04351	0.07398	0.01249	0.05536	0.04893	-0.01013	-0.01513	0.02574	0.00768	0.02689		13	0.01869	0.00826
0.5	-0.02727	0.01705	-0.00854	0.04405	0.08373	-0.00789	0.05761	0.0521	0.00521	-0.01431	0.02655	0.00164	0.02768		13	0.01982	0.00904
1	-0.01509	0.01743	-0.00684	0.03585	0.07088	0.00027	0.04874	0.05341	-0.00532	-0.03617	0.00892	-0.01074	0.04555		13	0.01591	0.00893
1.5	-0.02997	0.00753	-0.00669	0.04473	0.06833	-0.00626	0.06203	0.05148	0.01522	-0.03421	0.02505	0.01843	0.01893		13	0.01805	0.00902
2	-0.04551	0.01077	-0.01602	0.03654	0.07988	0.00371	0.06143	0.05519	0.00401	-0.00821	0.02286	-0.01328	0.02693		13	0.01679	0.00975
2.5	-0.01554	-0.00276	-0.01858	0.04048	0.0738	-0.0262	0.05812	0.04942	-0.00049	-0.01833	0.01702	0.00523	0.04061		13	0.0156	0.00924
3	-0.01289	0.00522	-0.00913	0.03776	0.07555	0.00844	0.06738	0.05103	0.00396	-0.00647	0.01508	0.01913	0.02593		13	0.02161	0.00796
3.5	-0.00986	0.01472	-0.02014	0.04421	0.09363	-0.00766	0.05858	0.05181	-0.01335	-0.02045	0.00684	0.0008	0.02938		13	0.01758	0.00984
4	-0.00485	-0.00578	-0.01458	0.04124	0.08681	-0.01722	0.04448	0.05528	-0.00129	-0.02935	0.02275	-0.00166	0.03241		13	0.01602	0.00945
4.5	-0.02161	0.00143	-0.01544	0.03871	0.08829	0.00464	0.06018	0.06108	-0.00433	-0.02325	0.02931	0.00975	0.0261		13	0.0196	0.00967
5	-0.02305	0.01336	-0.00635	0.03861	0.0866	0.01469	0.05071	0.04962	-0.00466	-0.00971	0.01183	-0.0144	0.02617		13	0.01796	0.00875
5.5	-0.01616	0.00673	-0.01464	0.04169	0.08158	-0.01584	0.07033	0.05395	-0.01382	-0.01536	0.01883	-0.00778	0.03682		13	0.01741	0.0099
6	-0.01452	0.01668	-0.01398	0.04253	0.09176	-0.02068	0.04768	0.05393	0.00136	-0.02732	0.01109	0.0113	0.03274		13	0.01789	0.00962
6.5	-0.00876	-0.00116	-0.00334	0.04017	0.07925	0.00719	0.04777	0.0554	-0.00042	-0.01778	0.02307	-0.01738	0.01575		13	0.0169	0.00842
7	-0.00849	0.02074	-0.03711	0.04349	0.08601	-0.00415	0.04705	0.06126	-0.01525	-0.02629	0.03115	0.00515	0.04431		13	0.01907	0.01023
7.5	-0.01857	-0.00122	-0.00409	0.03727	0.09335	-0.00907	0.04995	0.05345	0.00572	-0.03098	-0.00024	0.00031	0.01421		13	0.01462	0.00958
8	-0.00494	0.00846	-0.00478	0.03728	0.08909	-0.01076	0.04718	0.05637	0.00308	-0.03238	0.02003	-0.00292	0.02331		13	0.01762	0.00911
8.5	-0.01862	0.00696	-0.01402	0.03336	0.08405	-0.02185	0.06304	0.05299	0.00157	-0.03156	0.00818	0.00468	0.02245		13	0.01471	0.00974
9	-0.00902	0.00207	-0.01962	0.03648	0.08064	-0.00389	0.04864	0.05652	-0.00095	-0.03047	0.02026	0.00312	0.03325		13	0.0167	0.00903
9.5	-0.01593	-0.00194	-0.03593	0.03737	0.08046	0.00012	0.05664	0.06073	0.00029	-0.02321	0.01177	-0.00922	0.03463		13	0.01506	0.00991
10	-0.0285	0.00644	-0.01591	0.04405	0.08336	-0.00618	0.05167	0.06084	-0.00373	-0.01862	0.01737	7e-05	0.03625		13	0.01747	0.00961
10.5	-0.02772	0.00917	-0.00831	0.03455	0.09051	0.00981	0.05857	0.05428	-0.002	-0.0148	0.02448	-0.00734	0.04202		13	0.02025	0.0095
11	-0.00777	0.01081	-0.01678	0.04684	0.10552	0.03019	0.0674	0.07071	0.0105	-0.02069	0.00778	-0.01585	0.01751		13	0.02355	0.0108
11.5	-0.00983	0.02462	-0.02506	0.05569	0.06593	0.00303	0.06612	0.06583	0.0027	-0.0082	0.02684	-0.01319	0.03231		13	0.02206	0.00919
12	-0.01042	0.02906	-0.00245	0.06122	0.11048	0.01656	0.07447	0.07493	0.00781	-0.00432	0.01751	-0.00286	0.0307		13	0.03098	0.0105
12.5	-0.03299	0.01811	3e-05	0.06317	0.10611	0.00921	0.08507	0.07685	0.01172	0.01362	0.01642	-0.01225	0.02855		13	0.02951	0.01136
13	0.00946	0.02419	0.01116	0.06413	0.1326	0.00256	0.07686	0.08171	0.01593	-0.0009	0.02212	-0.00862	0.02764		13	0.0353	0.01146
13.5	0.00388	0.05107	0.00558	0.0695	0.14934	0.02609	0.09125	0.08784	0.01635	-0.00101	0.03745	0.00114	0.03263		13	0.04393	0.01244
14	0.00979	0.04576	0.00236	0.08174	0.12851	0.03257	0.09335	0.09263	0.0233	0.00694	0.02506	0.00807	0.03429		13	0.04495	0.01131
14.5	0.01958	0.05672	0.01494	0.09475	0.12603	0.03745	0.10705	0.09182	0.03558	0.01171	0.02621	-0.01031	0.01673		13	0.04833	0.0119
15	0.00361	0.06784	0.0083	0.08799	0.15027	0.06092	0.10316	0.09988	0.02696	0.02757	0.01745	-0.01437	0.02003		13	0.05074	0.01346
15.5	0.03352	0.06013	0.01829	0.08642	0.1545	0.04635	0.10629	0.1047	0.0323	0.02955	0.03146	-0.00772	0.03274		13	0.05604	0.01241
16	0.01863	0.07774	0.00826	0.09475	0.14295	0.05106	0.11903	0.10734	0.03936	0.01734	0.02091	-0.01227	0.02		13	0.05424	0.01358
16.5	0.0574	0.09557	0.01912	0.09755	0.18657	0.06861	0.11752	0.10963	0.06028	0.0378	0.03635	-0.00251	0.03205		13	0.07046	0.01399
17	0.04321	0.08184	0.01794	0.09973	0.15638	0.07854	0.11622	0.11011	0.05435	0.03801	0.02285	-0.00714	0.02906		13	0.0647	0.01303
17.5	0.05243	0.10593	0.03554	0.10283	0.1651	0.09879	0.13448	0.10955	0.04816	0.03492	0.03178	0.01555	0.03587		13	0.07469	0.01303
18	0.0656	0.10417	0.03666	0.11456	0.18151	0.08348	0.1296	0.12307	0.04703	0.03892	0.04725	-0.0164	0.02826		13	0.07567	0.01478
18.5	0.05212	0.10938	0.04417	0.1184	0.17921	0.08687	0.12586	0.11894	0.06615	0.05721	0.04037	-0.01679	0.05417		13	0.0797	0.01392
19	0.07152	0.13178	0.04136	0.11736	0.21493	0.10384	0.1451	0.13219	0.0695	0.04697	0.01756	0.00476	0.04546		13	0.08787	0.01651
19.5	0.09981	0.12787	0.04568	0.12785	0.21297	0.10396	0.15627	0.12979	0.06404	0.05291	0.03602	-0.0037	0.04061		13	0.09185	0.01648
20	0.08061	0.13015	0.0449	0.11694	0.22209	0.12635	0.14122	0.13534	0.0657	0.05057	0.05115	0.00478	0.0458		13	0.09351	0.01614
20.5	0.07378	0.13792	0.07555	0.12852	0.2092	0.11903	0.1447	0.14203	0.08181	0.06535	0.04626	-0.00298	0.02836		13	0.09612	0.01592
21	0.07972	0.14877	0.05683	0.12645	0.20033	0.12239	0.15807	0.14447	0.07656	0.06468	0.04269	0.00328	0.02546		13	0.09613	0.01622
21.5	0.08201	0.14373	0.06769	0.12106	0.21276	0.10258	0.16319	0.1456	0.08649	0.07574	0.04077	0.02252	0.04128		13	0.10042	0.01524
22	0.08903	0.15096	0.07455	0.13024	0.21473	0.13561	0.15508	0.14798	0.07502	0.06524	0.02957	0.01329	0.03286		13	0.10109	0.01657
22.5	0.08072	0.15292	0.07801	0.13538	0.21626	0.13169	0.15945	0.15663	0.09861	0.07483	0.0582	0.01537	0.03925		13	0.10749	0.01575
23	0.08957	0.15509	0.07395	0.13904	0.21799	0.1266	0.16623	0.15622	0.07762	0.06565	0.05019	0.00698	0.04061		13	0.10506	0.01671
23.5	0.1231	0.16148	0.07576	0.12894	0.23773	0.13088	0.17186	0.15944	0.09664	0.07672	0.04719	0.03134	0.0427		13	0.11414	0.01662
24	0.09351	0.17843	0.0819	0.13936	0.23293	0.13939	0.16868	0.15819	0.1046	0.07526	0.02945	0.01726	0.04064		13	0.11228	0.0178
24.5	0.11096	0.19113	0.08768	0.14639	0.2406	0.13429	0.16982	0.15335	0.09889	0.07556	0.06382	0.01538	0.03754		13	0.11734	0.01762
25	0.10443	0.17916	0.08924	0.14463	0.22403	0.1496	0.16786	0.16133	0.11504	0.09214	0.06218	0.02428	0.05087		13	0.12037	0.01583
25.5	0.10694	0.17974	0.11031	0.15228	0.27528	0.13505	0.18059	0.16457	0.1096	0.07443	0.05409	0.00953	0.04314		13	0.12273	0.01952
26	0.12368	0.17852	0.07653	0.16216	0.25645	0.15328	0.17341	0.17093	0.12073	0.07947	0.05877	0.01913	0.06265		13	0.12582	0.01803
26.5	0.14139	0.20293	0.09709	0.14964	0.22864	0.1515	0.17958	0.16877	0.10667	0.0794	0.04356	0.02199	0.04952		13	0.12467	0.0178
27	0.1161	0.18664	0.09469	0.14545	0.28316	0.18315	0.18331	0.16789	0.10974	0.08705	0.04774	0.0291	0.0489		13	0.12946	0.01981
27.5	0.10655	0.1963	0.11556	0.1438	0.24121	0.16311	0.1865	0.1683	0.12389	0.0978	0.06002	0.01672	0.0341		13	0.12722	0.01815
28	0.12498	0.18871	0.10502	0.15637	0.2604	0.17296	0.17273	0.17438	0.11779	0.0912	0.0653	0.0157	0.03941		13	0.12961	0.0187
28.5	0.11866	0.22205	0.09947	0.14971	0.26709	0.1633	0.18928	0.1775	0.13061	0.09782	0.05257	0.00837	0.06066		13	0.13362	0.01995
29	0.115	0.2038	0.08636	0.16869	0.28138	0.16831	0.18441	0.17794	0.11253	0.08739	0.07135	0.03437	0.05706		13	0.13451	0.01936
29.5	0.11096	0.20183	0.1084	0.1489	0.29398	0.16875	0.1835	0.18183	0.12318	0.10362	0.07083	0.02202	0.05453		13	0.13633	0.01983
30	0.11246	0.20503	0.1095	0.1518	0.27694	0.15591	0.20804	0.17621	0.11977	0.1084	0.0767	0.02833	0.05989		13	0.13762	0.01882
30.5	0.1165	0.20965	0.09793	0.15545	0.26968	0.18494	0.19704	0.18434	0.13052	0.10737	0.05948	0.01742	0.04355		13	0.13645	0.02014
31	0.13347	0.21434	0.10156	0.16064	0.26332	0.1695	0.17965	0.18057	0.12556	0.09413	0.06964	0.01652	0.05101		13	0.13538	0.0191
31.5	0.13958	0.19206	0.08885	0.15822	0.27722	0.15929	0.19048	0.17685	0.14252	0.09947	0.06777	0.0223	0.05384		13	0.13604	0.01907
32	0.12494	0.20182	0.1106	0.15947	0.26368	0.17678	0.1762	0.176	0.11495	0.09489	0.06751	0.02479	0.0481		13	0.13383	0.01855
32.5	0.13449	0.18601	0.09879	0.1483	0.27357	0.17565	0.1849	0.18034	0.12324	0.11372	0.07207	0.04594	0.04937		13	0.13742	0.01776
33	0.09228	0.19383	0.10108	0.14818	0.27064	0.18704	0.18292	0.1694	0.11694	0.11177	0.07354	0.03255	0.06025		13	0.13388	0.01824
33.5	0.09731	0.19495	0.08967	0.14117	0.25805	0.15672	0.1824	0.16887	0.12961	0.10329	0.05781	0.00901	0.07567		13	0.12804	0.01823
34	0.10352	0.19848	0.11001	0.14499	0.27648	0.16188	0.16828	0.17544	0.13961	0.1032	0.08293	0.02635	0.05985		13	0.13469	0.01798
34.5	0.08976	0.20303	0.1097	0.13229	0.25772	0.19884	0.17142	0.174	0.11303	0.09514	0.06451	0.03569	0.0561		13	0.13086	0.01829
35	0.09486	0.19616	0.08193	0.14711	0.2542	0.15628	0.17958	0.16869	0.10976	0.09924	0.06212	0.04335	0.05632		13	0.12689	0.01737
35.5	0.11732	0.19812	0.08926	0.14226	0.25685	0.15217	0.18126	0.16904	0.12919	0.08514	0.08543	0.02713	0.06048		13	0.13028	0.01731
36	0.12949	0.19572	0.10856	0.1349	0.25658	0.15526	0.16049	0.17167	0.12255	0.1016	0.05984	0.03332	0.05203		13	0.12939	0.01705
36.5	0.11271	0.20302	0.09426	0.13552	0.24663	0.15554	0.16381	0.16544	0.12303	0.09792	0.04797	0.01854	0.05401		13	0.12449	0.01776
37	0.09663	0.18549	0.11038	0.13332	0.24646	0.14942	0.17377	0.16373	0.12078	0.09841	0.08392	0.00718	0.06586		13	0.1258	0.01675
37.5	0.0929	0.21221	0.10228	0.12867	0.23041	0.15899	0.17086	0.17001	0.10422	0.0909	0.08425	0.00482	0.05363		13	0.1234	0.0176
38	0.09514	0.18695	0.11217	0.13848	0.2203	0.15453	0.16938	0.1639	0.12578	0.08188	0.05263	0.01895	0.05029		13	0.1208	0.01645
38.5	0.10727	0.20693	0.11401	0.13868	0.22214	0.1666	0.16331	0.17696	0.12279	0.09557	0.07923	0.00611	0.0616		13	0.12778	0.01674
39	0.11398	0.20059	0.11062	0.13825	0.25206	0.17829	0.16927	0.16921	0.13076	0.08961	0.09034	0.04048	0.08224		13	0.13582	0.01582
39.5	0.13015	0.20553	0.09047	0.14404	0.24604	0.17116	0.16704	0.17303	0.13495	0.08797	0.09381	0.03064	0.06253		13	0.13364	0.01664
40	0.11848	0.188	0.0884	0.1403	0.23377	0.16554	0.16298	0.1708	0.11636	0.09057	0.07924	0.03127	0.06279		13	0.12681	0.01572
40.5	0.12431	0.1995	0.11483	0.12043	0.23666	0.15763	0.16985	0.16929	0.11005	0.08726	0.06998	0.03109	0.06239		13	0.12717	0.01612
41	0.12504	0.19437	0.09874	0.14256	0.25492	0.17694	0.16854	0.16725	0.12468	0.09986	0.08047	0.03584	0.0538		13	0.13254	0.01679
41.5	0.10497	0.20664	0.10185	0.12343	0.23028	0.15114	0.16929	0.17028	0.10679	0.08973	0.07001	0.02904	0.0482		13	0.1232	0.01661
42	0.10785	0.19007	0.09534	0.13136	0.23485	0.15316	0.16678	0.17138	0.12834	0.08788	0.07523	0.01956	0.05882		13	0.12466	0.01632
42.5	0.11409	0.20445	0.10433	0.13529	0.24609	0.14813	0.17709	0.1689	0.10892	0.08438	0.09041	0.01144	0.07149		13	0.12808	0.01709
43	0.10092	0.20147	0.09445	0.124	0.21925	0.15164	0.16376	0.16039	0.12768	0.09978	0.07242	0.00959	0.07696		13	0.12325	0.01575
43.5	0.12563	0.22054	0.08696	0.12538	0.22723	0.16227	0.17705	0.161	0.11903	0.09007	0.09135	0.03011	0.07096		13	0.12981	0.0161
44	0.12058	0.19125	0.096	0.12916	0.2384	0.15989	0.17429	0.16844	0.11883	0.09065	0.07393	0.01597	0.0693		13	0.12667	0.01649
44.5	0.09943	0.19775	0.09565	0.12603	0.23052	0.17108	0.16396	0.17754	0.11807	0.09543	0.09105	0.01052	0.07746		13	0.12727	0.01635
45	0.10329	0.19355	0.09978	0.13242	0.22696	0.16016	0.16639	0.17153	0.11746	0.10153	0.06254	0.02463	0.06435		13	0.12497	0.01594
45.5	0.1384	0.19268	0.10339	0.12638	0.20704	0.15648	0.17251	0.17359	0.114	0.10219	0.08077	0.03392	0.06929		13	0.12851	0.01419
46	0.11815	0.1951	0.09959	0.12177	0.22209	0.16336	0.16635	0.16868	0.12736	0.09547	0.07657	4e-05	0.07359		13	0.12524	0.01633
46.5	0.13381	0.20208	0.07999	0.13057	0.21896	0.15326	0.17504	0.17286	0.11963	0.08617	0.08938	0.0162	0.0529		13	0.12545	0.01647
47	0.11603	0.18622	0.11875	0.12872	0.21162	0.17656	0.156	0.17162	0.12119	0.09443	0.08292	0.03349	0.09129		13	0.12991	0.01366
47.5	0.1116	0.19038	0.09803	0.13155	0.21348	0.15657	0.16651	0.16954	0.12536	0.09666	0.07282	0.01595	0.06387		13	0.12402	0.01538
48	0.08934	0.19183	0.08935	0.13011	0.22347	0.168	0.16048	0.16663	0.11116	0.09344	0.0962	0.02729	0.06631		13	0.12412	0.01531
48.5	0.13078	0.20751	0.10594	0.12415	0.21833	0.14925	0.18674	0.16566	0.11363	0.10219	0.09274	0.03769	0.06124		13	0.13045	0.01497
49	0.10096	0.20204	0.09322	0.13752	0.25303	0.12686	0.18383	0.17128	0.12159	0.08467	0.09121	0.03135	0.05677		13	0.12726	0.01714
49.5	0.12709	0.19389	0.09422	0.12922	0.22448	0.18319	0.15796	0.16955	0.11146	0.09765	0.06683	0.03009	0.06552		13	0.12701	0.01579
50	0.11482	0.19603	0.10286	0.12863	0.21951	0.16779	0.17482	0.17457	0.1241	0.09464	0.08118	0.02888	0.0646		13	0.12865	0.01538
50.5	0.11865	0.21003	0.11835	0.1268	0.22093	0.17814	0.16447	0.17246	0.12974	0.08913	0.07668	0.02112	0.08339		13	0.13153	0.01576
51	0.11295	0.20414	0.10904	0.11777	0.21694	0.16689	0.1657	0.17231	0.12377	0.09897	0.08567	0.03769	0.07174		13	0.12951	0.0146
51.5	0.11646	0.2113	0.11686	0.12687	0.21368	0.1824	0.17204	0.17078	0.11308	0.09715	0.08254	0.02507	0.06923		13	0.13057	0.0157
52	0.09384	0.19295	0.10465	0.12734	0.20742	0.15948	0.15741	0.17473	0.11992	0.10711	0.07102	0.0149	0.06238		13	0.12255	0.01535
52.5	0.11655	0.21037	0.12922	0.12429	0.23864	0.14241	0.16199	0.17326	0.12888	0.09816	0.09318	0.01644	0.06898		13	0.13095	0.01611
53	0.11635	0.18291	0.11792	0.12283	0.21979	0.17614	0.17403	0.17347	0.12542	0.0974	0.05968	0.02671	0.08546		13	0.12909	0.01516
53.5	0.12483	0.18071	0.11239	0.12034	0.21615	0.18529	0.16446	0.17465	0.12678	0.08814	0.09351	0.0333	0.06095		13	0.12935	0.01473
54	0.12935	0.1956	0.1096	0.12524	0.24568	0.18048	0.1587	0.16823	0.11378	0.11322	0.07882	0.03653	0.06283		13	0.13216	0.01587
54.5	0.11368	0.20584	0.09491	0.12225	0.19079	0.17456	0.17772	0.17292	0.11489	0.09093	0.08552	0.02216	0.06966		13	0.12583	0.01517
55	0.11721	0.19364	0.12164	0.1189	0.22147	0.16719	0.17486	0.17824	0.11377	0.08724	0.06456	0.02964	0.05888		13	0.12671	0.01598
55.5	0.12534	0.18783	0.11559	0.12643	0.20287	0.17329	0.16437	0.17153	0.12481	0.08923	0.07656	0.00478	0.06273		13	0.12503	0.01563
56	0.11266	0.19522	0.10938	0.12553	0.20151	0.17526	0.15114	0.16496	0.13304	0.09815	0.07546	0.01615	0.06594		13	0.12495	0.01488
56.5	0.12093	0.21148	0.13258	0.12632	0.20244	0.15935	0.1657	0.17119	0.10982	0.10921	0.08326	0.02995	0.06976		13	0.13015	0.01443
57	0.12545	0.20449	0.09607	0.1349	0.21508	0.14521	0.16455	0.1702	0.12042	0.0898	0.0664	0.02785	0.09066		13	0.12701	0.0149
57.5	0.13364	0.18961	0.11507	0.11883	0.23089	0.16082	0.17808	0.16828	0.12471	0.08574	0.08837	0.03873	0.07769		13	0.13157	0.01467
58	0.13077	0.20678	0.10716	0.12146	0.20625	0.16714	0.1638	0.17336	0.11824	0.0891	0.08934	0.02614	0.07722		13	0.12898	0.0147
58.5	0.12921	0.2069	0.11979	0.12624	0.186	0.16987	0.16804	0.17168	0.12472	0.10306	0.06611	0.022	0.06876		13	0.12788	0.01479
59	0.13298	0.18262	0.10929	0.12221	0.2172	0.15732	0.16985	0.16907	0.11323	0.09995	0.09427	0.03808	0.0739		13	0.12923	0.01358
59.5	0.14713	0.19237	0.11983	0.12931	0.20383	0.16563	0.16698	0.17242	0.12011	0.09706	0.10182	0.01488	0.07875		13	0.13155	0.01432
60	0.14329	0.20369	0.10324	0.12677	0.19901	0.16882	0.15991	0.17096	0.12659	0.08868	0.08787	0.02058	0.07048		13	0.12845	0.0148
60.5	0.13504	0.20245	0.12542	0.12093	0.2035	0.14886	0.16744	0.17197	0.12227	0.0865	0.08504	0.04335	0.06953		13	0.12941	0.01374
61	0.13327	0.20498	0.13243	0.12832	0.21148	0.17978	0.15605	0.17153	0.11572	0.08549	0.08365	0.02095	0.0788		13	0.13096	0.01519
61.5	0.1179	0.20669	0.10947	0.12342	0.19996	0.17091	0.18047	0.1726	0.13294	0.09165	0.08676	0.01311	0.08479		13	0.13005	0.01529
62	0.12619	0.20466	0.10635	0.12417	0.17972	0.17082	0.18484	0.17479	0.12592	0.0897	0.08099	0.03163	0.07891		13	0.12913	0.01424
62.5	0.15096	0.20941	0.10915	0.12428	0.19484	0.16484	0.17374	0.17731	0.12032	0.09488	0.07921	0.03953	0.08141		13	0.1323	0.01413
63	0.11676	0.18765	0.11542	0.12158	0.1901	0.14881	0.17499	0.17139	0.11387	0.09919	0.08356	0.03703	0.07419		13	0.12573	0.013
63.5	0.12263	0.19398	0.10851	0.12776	0.20154	0.19886	0.18386	0.17077	0.13656	0.08918	0.08802	0.01645	0.07479		13	0.13176	0.01569
64	0.12627	0.20438	0.12737	0.12892	0.20638	0.17579	0.18513	0.17045	0.11462	0.09888	0.10811	0.01613	0.08635		13	0.13452	0.01486
64.5	0.11658	0.19804	0.12092	0.12551	0.17477	0.16681	0.18486	0.16666	0.12773	0.09501	0.10192	0.01492	0.06638		13	0.1277	0.01429
65	0.12425	0.20411	0.11832	0.12691	0.21095	0.17081	0.17931	0.17508	0.12025	0.09917	0.07861	0.04943	0.07988		13	0.13362	0.01407
65.5	0.14377	0.18959	0.11124	0.11951	0.20731	0.17499	0.17347	0.17302	0.12707	0.09472	0.08884	0.046	0.05646		13	0.13123	0.01417
66	0.13276	0.18851	0.11585	0.13046	0.21052	0.16939	0.18465	0.17023	0.11704	0.10045	0.08188	0.01577	0.07734		13	0.13037	0.01507
66.5	0.12915	0.20307	0.10942	0.12104	0.19226	0.16966	0.17432	0.1737	0.12296	0.0985	0.09892	0.03257	0.07932		13	0.13115	0.01369
67	0.13695	0.19	0.12242	0.1171	0.19223	0.15163	0.16958	0.16978	0.13129	0.0981	0.07731	0.03772	0.08944		13	0.1295	0.01274
67.5	0.15701	0.20717	0.11629	0.1241	0.18753	0.14765	0.19491	0.17234	0.13544	0.09996	0.09234	0.02464	0.06457		13	0.13261	0.0148
68	0.13389	0.18951	0.09634	0.11659	0.17629	0.16566	0.17899	0.1758	0.12961	0.10547	0.0943	0.03916	0.09361		13	0.1304	0.01246
68.5	0.11692	0.19349	0.10903	0.11449	0.18391	0.16197	0.17778	0.17312	0.11665	0.10438	0.09084	0.00336	0.07469		13	0.12466	0.01477
69	0.11472	0.20688	0.10268	0.11124	0.18271	0.15009	0.17426	0.17209	0.11777	0.09768	0.08951	0.02896	0.084		13	0.12558	0.01365
69.5	0.13742	0.20681	0.10197	0.12298	0.16945	0.16354	0.17146	0.17186	0.11603	0.1047	0.08469	0.0281	0.0737		13	0.12713	0.0137
70
70.5
71
71.5
72
72.5
73
73.5
74
74.5
75
75.5
76
76.5
77
77.5
78
78.5
79
79.5
80
80.5
81
81.5
82
82.5
83
83.5
84
84.5
85
85.5
86
86.5
87
87.5
88
88.5
89
89.5
90	0.14427	0.22318	0.10336	0.12339	0.17117	0.17398	0.17063	0.17343	0.11399	0.13359	0.08909	0.02728	0.07317		13	0.13235	0.01442
90.5	0.17125	0.21978	0.11242	0.13254	0.18387	0.18241	0.19093	0.17505	0.10926	0.13417	0.07265	0.03739	0.0595		13	0.13702	0.01563
91	0.17323	0.20477	0.1015	0.13083	0.1815	0.19338	0.17567	0.16903	0.10865	0.13399	0.09058	0.01924	0.06463		13	0.13438	0.01537
91.5	0.18395	0.22067	0.10397	0.13648	0.18933	0.14151	0.17307	0.17565	0.0976	0.12612	0.07593	0.02054	0.06118		13	0.13123	0.01604
92	0.18123	0.20878	0.09339	0.12797	0.17753	0.19521	0.16602	0.16886	0.09965	0.13239	0.09032	0.03033	0.05062		13	0.13248	0.01564
92.5	0.19216	0.20822	0.10879	0.13181	0.18286	0.17383	0.18279	0.17115	0.09772	0.13327	0.09214	0.00195	0.06585		13	0.13404	0.01649
93	0.18105	0.21664	0.09666	0.12431	0.17245	0.17362	0.17796	0.17583	0.11571	0.13225	0.09308	0.0296	0.0654		13	0.13497	0.01495
93.5	0.17231	0.21142	0.10595	0.11961	0.16593	0.15854	0.16476	0.17407	0.10547	0.12137	0.08311	0.02621	0.0595		13	0.12833	0.01453
94	0.16482	0.21591	0.11515	0.13321	0.1848	0.16364	0.16119	0.16525	0.11144	0.12625	0.07304	0.01821	0.08051		13	0.1318	0.01469
94.5	0.18238	0.20048	0.13198	0.13364	0.18539	0.17251	0.17475	0.16806	0.10294	0.12396	0.101	0.04411	0.0621		13	0.13718	0.01363
95	0.19698	0.20292	0.11488	0.13034	0.18082	0.19295	0.15529	0.17092	0.1002	0.13119	0.09732	0.02432	0.06078		13	0.1353	0.01528
95.5	0.14953	0.1936	0.10307	0.11982	0.16622	0.16761	0.15046	0.17183	0.10326	0.12238	0.08734	0.02472	0.06727		13	0.12516	0.01327
96	0.18209	0.21055	0.12131	0.13265	0.18402	0.16938	0.16969	0.17289	0.10481	0.13354	0.07888	0.02553	0.05764		13	0.13407	0.01527
96.5	0.16463	0.21497	0.11728	0.1306	0.18119	0.16368	0.16761	0.17045	0.10692	0.12107	0.0967	0.02007	0.07124		13	0.1328	0.01444
97	0.15628	0.20774	0.12256	0.12511	0.17356	0.15025	0.17175	0.17355	0.10055	0.11443	0.08662	0.04366	0.06616		13	0.13017	0.01322
97.5	0.2067	0.21839	0.13644	0.12734	0.17666	0.15641	0.17719	0.17022	0.11813	0.13737	0.09863	0.03575	0.07745		13	0.14128	0.01424
98	0.16396	0.20611	0.09554	0.14011	0.19438	0.17174	0.16652	0.17219	0.09375	0.13862	0.0787	0.03156	0.05903		13	0.13171	0.01518
98.5	0.17202	0.2383	0.12703	0.14279	0.19809	0.16466	0.16363	0.1684	0.10034	0.1256	0.08038	0.02185	0.06477		13	0.13599	0.0162
99	0.17774	0.19918	0.13333	0.13427	0.18627	0.14875	0.18374	0.17411	0.10709	0.12086	0.08378	0.03607	0.06391		13	0.13455	0.01412
99.5	0.16905	0.22098	0.11144	0.13509	0.18741	0.17097	0.16892	0.17059	0.10276	0.13723	0.08347	0.02008	0.06502		13	0.13408	0.01548
100	0.17854	0.20301	0.10747	0.13417	0.18613	0.16763	0.16565	0.17142	0.09552	0.14332	0.07562	0.03853	0.04639		13	0.1318	0.01506
100.5	0.16798	0.22017	0.11728	0.13031	0.18078	0.16141	0.1595	0.17581	0.09619	0.13234	0.0897	0.03149	0.06808		13	0.13316	0.01442
101	0.16106	0.22349	0.12073	0.13688	0.18989	0.16692	0.18263	0.18183	0.10581	0.13785	0.08072	0.0339	0.07111		13	0.13791	0.01502
101.5	0.20459	0.23484	0.14803	0.13883	0.1926	0.14652	0.16847	0.17761	0.08925	0.13187	0.09387	0.04843	0.05583		13	0.14083	0.01571
102	0.18251	0.24762	0.15246	0.13957	0.19363	0.17578	0.18735	0.19474	0.11088	0.15838	0.10926	0.04384	0.06288		13	0.15069	0.01577
102.5	0.18828	0.24706	0.14105	0.14826	0.20568	0.15265	0.18673	0.18988	0.11754	0.14271	0.08067	0.038	0.06413		13	0.14636	0.01654
103	0.18893	0.2366	0.15265	0.14432	0.20021	0.17705	0.20815	0.19884	0.11916	0.14786	0.09	0.05168	0.07472		13	0.15309	0.01557
103.5	0.18139	0.23207	0.15764	0.14938	0.20723	0.17619	0.19135	0.19472	0.11073	0.15968	0.07693	0.03968	0.07501		13	0.15016	0.01606
104	0.2136	0.23029	0.13759	0.15286	0.21206	0.1888	0.1917	0.20461	0.11925	0.16092	0.09929	0.03452	0.06852		13	0.15492	0.0168
104.5	0.21226	0.25644	0.13435	0.17657	0.24495	0.19027	0.20782	0.20204	0.12663	0.16064	0.08809	0.02419	0.06772		13	0.16092	0.01935
105	0.20244	0.24866	0.15233	0.1587	0.22017	0.16421	0.21196	0.20745	0.11979	0.14427	0.09778	0.03488	0.05749		13	0.15539	0.01789
105.5	0.22302	0.24212	0.13478	0.16362	0.22699	0.21488	0.20318	0.20547	0.12461	0.15191	0.09178	0.03297	0.067		13	0.16018	0.01853
106	0.18758	0.23408	0.15258	0.16277	0.22581	0.17112	0.20472	0.20326	0.14308	0.15626	0.08552	0.03948	0.06484		13	0.15624	0.01677
106.5	0.21589	0.26313	0.14744	0.15923	0.2209	0.18935	0.20939	0.20751	0.13207	0.1537	0.10747	0.03096	0.06753		13	0.16189	0.01824
107	0.23535	0.24055	0.17073	0.17426	0.24175	0.19231	0.2124	0.20778	0.13966	0.15861	0.11558	0.03404	0.06425		13	0.16825	0.01822
107.5	0.21354	0.26806	0.1724	0.16513	0.22908	0.21923	0.20184	0.20823	0.13669	0.15425	0.09353	0.04758	0.07591		13	0.16811	0.01807
108	0.19776	0.24721	0.15225	0.1673	0.2321	0.20549	0.21442	0.211	0.14014	0.18831	0.10528	0.03908	0.08234		13	0.1679	0.01717
108.5	0.21989	0.24643	0.14032	0.16614	0.23048	0.22254	0.21141	0.21182	0.14649	0.16951	0.10133	0.01986	0.06833		13	0.16573	0.01912
109	0.21399	0.26607	0.15257	0.1722	0.23888	0.17371	0.21745	0.21593	0.16069	0.16868	0.08799	0.04846	0.06432		13	0.16777	0.01848
109.5	0.20264	0.26487	0.16733	0.1806	0.25055	0.22107	0.20688	0.21127	0.13688	0.15946	0.08988	0.02448	0.06476		13	0.16774	0.01996
110	0.20433	0.24498	0.13812	0.17711	0.24571	0.20857	0.21868	0.20753	0.15502	0.14639	0.10253	0.03237	0.05884		13	0.16463	0.0188
110.5	0.23546	0.25829	0.15262	0.17206	0.23869	0.21424	0.22645	0.21716	0.14536	0.17683	0.09479	0.04007	0.07919		13	0.17317	0.01891
111	0.2326	0.26396	0.14708	0.17155	0.23799	0.21105	0.23178	0.21407	0.15665	0.16673	0.09429	0.03305	0.07411		13	0.17191	0.01948
111.5	0.21944	0.25546	0.14655	0.17791	0.24681	0.20711	0.21922	0.21921	0.15815	0.17266	0.09646	0.02889	0.08409		13	0.17169	0.01883
112	0.2101	0.25316	0.1464	0.17723	0.24587	0.21081	0.23284	0.2143	0.15638	0.1687	0.10747	0.03832	0.06887		13	0.17157	0.01862
112.5	0.23673	0.25738	0.1781	0.17921	0.24861	0.20126	0.22359	0.21654	0.16825	0.18976	0.086	0.03906	0.06239		13	0.17591	0.01964
113	0.22807	0.26465	0.1427	0.17545	0.2434	0.22445	0.23262	0.22213	0.17344	0.17244	0.10235	0.03941	0.08122		13	0.1771	0.01911
113.5	0.24075	0.23688	0.14676	0.16755	0.23244	0.23582	0.22043	0.21873	0.17494	0.16249	0.11894	0.04294	0.08535		13	0.17569	0.01768
114	0.2663	0.2539	0.16208	0.17782	0.24669	0.22708	0.23514	0.22084	0.16738	0.17004	0.10519	0.04093	0.07171		13	0.18039	0.01986
114.5	0.24589	0.25721	0.13855	0.17275	0.23966	0.22049	0.22191	0.21704	0.17662	0.16964	0.09566	0.0575	0.0705		13	0.17565	0.01867
115	0.24718	0.25928	0.13057	0.1851	0.25678	0.21375	0.23688	0.2187	0.17722	0.18077	0.11602	0.05951	0.08691		13	0.18221	0.0183
115.5	0.21921	0.25761	0.14759	0.1876	0.26026	0.20766	0.23006	0.21464	0.17814	0.16666	0.10192	0.03848	0.0736		13	0.17565	0.01911
116	0.26273	0.27514	0.12924	0.18241	0.25306	0.21121	0.23169	0.22737	0.19505	0.17326	0.09485	0.05333	0.06521		13	0.18112	0.02064
116.5	0.22719	0.27626	0.15343	0.18639	0.25857	0.21904	0.2139	0.21689	0.17277	0.1825	0.10083	0.0528	0.07265		13	0.17948	0.01903
117	0.26454	0.27231	0.13566	0.19644	0.27251	0.22584	0.21702	0.21893	0.17951	0.18212	0.10476	0.0341	0.09115		13	0.18422	0.02058
117.5	0.22861	0.26345	0.11578	0.18776	0.26048	0.22188	0.23878	0.224	0.20782	0.17677	0.09672	0.0498	0.07768		13	0.18073	0.01998
118	0.25786	0.27479	0.15052	0.19051	0.26429	0.20954	0.21353	0.22383	0.18062	0.1739	0.12367	0.04778	0.09114		13	0.18477	0.01883
118.5	0.25258	0.25741	0.13829	0.18184	0.25226	0.23443	0.22394	0.22081	0.20429	0.17924	0.11146	0.04613	0.09996		13	0.18482	0.01862
119	0.23752	0.25878	0.13691	0.19119	0.26523	0.21361	0.22816	0.22011	0.1845	0.18346	0.09279	0.05008	0.07877		13	0.18009	0.01938
119.5	0.25513	0.25804	0.12351	0.19476	0.27018	0.21696	0.21809	0.2237	0.1969	0.17196	0.08193	0.04465	0.07403		13	0.17922	0.0208
120	0.23707	0.26161	0.15039	0.19426	0.26949	0.22081	0.22167	0.2253	0.19735	0.17272	0.10871	0.0672	0.06625		13	0.18406	0.01884
120.5	0.23122	0.26381	0.14502	0.17831	0.24737	0.21985	0.22658	0.23155	0.17917	0.15979	0.09688	0.04128	0.07725		13	0.17677	0.01942
121	0.24431	0.24376	0.12762	0.19036	0.26408	0.22209	0.22063	0.22392	0.19724	0.16675	0.09599	0.05162	0.07378		13	0.17863	0.01941
121.5	0.25127	0.25029	0.13491	0.18468	0.2562	0.20516	0.22961	0.22251	0.18377	0.18093	0.10395	0.04144	0.06199		13	0.17744	0.01988
122	0.23194	0.23734	0.13594	0.19132	0.26542	0.21789	0.21089	0.21552	0.20066	0.17627	0.10168	0.05884	0.10085		13	0.18035	0.01727
122.5	0.28232	0.2711	0.12693	0.17904	0.24838	0.23693	0.23335	0.21081	0.21183	0.18571	0.10192	0.04289	0.08284		13	0.1857	0.02092
123	0.24635	0.25425	0.11585	0.18066	0.25063	0.21137	0.21434	0.22031	0.1818	0.1764	0.10278	0.05029	0.07976		13	0.17575	0.01885
123.5	0.2603	0.22395	0.12813	0.18518	0.25689	0.21419	0.22138	0.21092	0.19181	0.17195	0.09844	0.05148	0.08252		13	0.1767	0.01853
124	0.22048	0.25089	0.11489	0.17589	0.244	0.22338	0.22122	0.21124	0.18822	0.1713	0.11736	0.06365	0.06943		13	0.17477	0.01773
124.5	0.2327	0.24237	0.11072	0.17323	0.24032	0.19757	0.21119	0.2199	0.18954	0.1657	0.10086	0.06914	0.08942		13	0.17251	0.01686
125	0.2449	0.2318	0.14213	0.18485	0.25645	0.21781	0.22007	0.21676	0.19752	0.1682	0.10251	0.05508	0.07857		13	0.1782	0.01806
125.5	0.22955	0.25048	0.12469	0.1654	0.22945	0.22924	0.21442	0.21727	0.1834	0.16109	0.12189	0.04581	0.08115		13	0.17337	0.01774
126	0.21146	0.25599	0.12637	0.17533	0.24323	0.22031	0.22517	0.21399	0.17286	0.17759	0.09068	0.04519	0.07998		13	0.17217	0.01859
126.5	0.25257	0.24661	0.12154	0.16956	0.23522	0.23709	0.22223	0.21114	0.20147	0.16823	0.08888	0.03506	0.09153		13	0.17547	0.01957
127	0.23444	0.24141	0.13075	0.16494	0.22882	0.24215	0.21173	0.21467	0.17662	0.16572	0.09697	0.05161	0.07957		13	0.17226	0.01804
127.5	0.26079	0.23811	0.1321	0.17076	0.23689	0.20445	0.21656	0.20571	0.18592	0.16826	0.12327	0.05778	0.07042		13	0.17469	0.01756
128	0.2371	0.2393	0.10734	0.17432	0.24184	0.19772	0.23583	0.21736	0.19907	0.17422	0.10355	0.05731	0.08165		13	0.17435	0.01813
128.5	0.24965	0.25063	0.11505	0.17378	0.24108	0.21086	0.22188	0.2123	0.19155	0.16326	0.10794	0.06149	0.08014		13	0.17535	0.01807
129	0.24748	0.24629	0.1123	0.174	0.24138	0.22184	0.20655	0.21344	0.2089	0.16729	0.10749	0.06719	0.07694		13	0.17624	0.01796
129.5	0.24445	0.22915	0.11844	0.16806	0.23315	0.20689	0.20718	0.21197	0.18504	0.17141	0.10837	0.05824	0.09188		13	0.17186	0.01656
130	0.25247	0.2336	0.12337	0.17304	0.24006	0.20401	0.2195	0.2175	0.19077	0.17539	0.11037	0.04244	0.09141		13	0.17492	0.01789
130.5	0.23457	0.22988	0.11115	0.16141	0.22392	0.20214	0.21139	0.21409	0.18818	0.15428	0.09212	0.04296	0.08039		13	0.16511	0.01779
131	0.22134	0.24628	0.13071	0.16164	0.22425	0.21426	0.20255	0.20597	0.20236	0.17622	0.10428	0.03984	0.08404		13	0.17029	0.01737
131.5	0.20863	0.23957	0.11483	0.15447	0.21429	0.19794	0.2162	0.21237	0.19248	0.1538	0.09456	0.04316	0.08423		13	0.16358	0.01711
132	0.21314	0.25499	0.12385	0.16882	0.2342	0.22207	0.21161	0.21247	0.1858	0.17056	0.0862	0.06078	0.08218		13	0.17128	0.01763
132.5	0.23779	0.2324	0.10516	0.1688	0.23417	0.19801	0.2242	0.21064	0.18566	0.1587	0.10542	0.04797	0.0697		13	0.16759	0.01819
133	0.22797	0.24378	0.13277	0.1743	0.24181	0.21229	0.22759	0.21156	0.20198	0.16845	0.09357	0.05971	0.08525		13	0.17547	0.01754
133.5	0.20858	0.23723	0.12457	0.17446	0.24203	0.21362	0.22807	0.21408	0.19025	0.17943	0.09729	0.0696	0.07274		13	0.17323	0.01711
134	0.23764	0.23988	0.11449	0.15768	0.21874	0.23087	0.21634	0.2044	0.18975	0.17487	0.09531	0.06364	0.0821		13	0.17121	0.01738
134.5	0.22237	0.2345	0.12218	0.16501	0.22892	0.23729	0.22485	0.206	0.19185	0.1644	0.1014	0.05617	0.07532		13	0.17156	0.01765
135	0.23829	0.25808	0.14433	0.15657	0.21721	0.19321	0.20636	0.21537	0.18588	0.17046	0.12322	0.05265	0.09731		13	0.17376	0.01616
135.5	0.26242	0.23366	0.1414	0.16251	0.22545	0.22509	0.21797	0.21583	0.19888	0.16895	0.10119	0.06636	0.08018		13	0.17691	0.01749
136	0.191	0.23419	0.11828	0.16461	0.22836	0.21817	0.22159	0.21048	0.19016	0.17011	0.11457	0.05733	0.09866		13	0.17058	0.01572
136.5	0.21793	0.24665	0.12167	0.16946	0.23509	0.21115	0.22365	0.21117	0.18311	0.16211	0.09244	0.06836	0.0863		13	0.17147	0.0169
137	0.21373	0.23663	0.12254	0.15867	0.22012	0.20516	0.20351	0.21554	0.18652	0.17862	0.10671	0.07149	0.09583		13	0.17039	0.01503
137.5	0.22765	0.21256	0.11375	0.16881	0.23419	0.21063	0.22118	0.20605	0.18528	0.16671	0.10602	0.06143	0.08763		13	0.16938	0.01619
138	0.21452	0.25184	0.13716	0.16652	0.23101	0.23479	0.21383	0.21361	0.18278	0.16436	0.0992	0.05067	0.09161		13	0.17322	0.01735
138.5	0.20382	0.22234	0.16284	0.16311	0.22628	0.21571	0.2263	0.22021	0.18858	0.15943	0.08104	0.05204	0.08583		13	0.16981	0.01685
139	0.2182	0.23763	0.16137	0.16772	0.23267	0.2294	0.23326	0.21892	0.19802	0.16466	0.10724	0.07173	0.08646		13	0.17902	0.01624
139.5	0.21749	0.24699	0.16019	0.17033	0.23629	0.2172	0.21479	0.21383	0.1896	0.16193	0.08474	0.05228	0.10479		13	0.17465	0.01687
140	0.23191	0.23899	0.13617	0.16379	0.22723	0.19846	0.22166	0.21743	0.19172	0.15744	0.10188	0.06355	0.07435		13	0.17112	0.01689
140.5	0.22374	0.22454	0.14791	0.15988	0.2218	0.21261	0.22194	0.21194	0.20058	0.17944	0.09603	0.05557	0.10425		13	0.17386	0.01584
141	0.22676	0.25138	0.14992	0.165	0.2289	0.21418	0.22527	0.2024	0.19314	0.17067	0.10514	0.04989	0.08774		13	0.17465	0.01707
141.5	0.23491	0.22195	0.16375	0.17285	0.23979	0.22585	0.21442	0.21253	0.19032	0.17106	0.09866	0.06004	0.0832		13	0.1761	0.01667
142	0.22516	0.24813	0.14969	0.16657	0.23109	0.22192	0.20947	0.21022	0.19079	0.16975	0.09989	0.05146	0.09889		13	0.17485	0.01666
142.5	0.21132	0.24688	0.15281	0.16013	0.22214	0.21569	0.22639	0.21142	0.20457	0.17099	0.10537	0.06164	0.09835		13	0.17598	0.01591
143	0.23731	0.24629	0.14979	0.16868	0.23401	0.23439	0.22979	0.21883	0.19535	0.17265	0.09176	0.06101	0.08475		13	0.17882	0.01788
143.5	0.2355	0.24974	0.16494	0.16891	0.23432	0.21859	0.23026	0.21572	0.19405	0.17587	0.10475	0.06015	0.08366		13	0.17973	0.01718
144	0.21875	0.23196	0.14498	0.17729	0.24595	0.21216	0.23118	0.21232	0.18493	0.1703	0.12638	0.07473	0.09392		13	0.17883	0.01518
144.5	0.19644	0.24542	0.15062	0.1669	0.23154	0.21977	0.22146	0.21243	0.20703	0.18106	0.10095	0.07036	0.08507		13	0.17608	0.01609
145	0.21746	0.23303	0.15251	0.16626	0.23065	0.20847	0.22267	0.20231	0.19354	0.16516	0.09071	0.06558	0.07984		13	0.1714	0.01629
145.5	0.22205	0.22302	0.13401	0.17567	0.2437	0.23287	0.22842	0.20818	0.20341	0.16182	0.09887	0.05809	0.09748		13	0.17597	0.01692
146	0.21362	0.24298	0.14876	0.15375	0.2133	0.20728	0.2234	0.20843	0.19635	0.17805	0.11647	0.07122	0.11677		13	0.17618	0.01415
146.5	0.23956	0.25767	0.1406	0.16799	0.23305	0.20559	0.23465	0.22004	0.1753	0.16829	0.0956	0.0556	0.08058		13	0.17496	0.0182
147	0.21895	0.25026	0.17242	0.16755	0.23244	0.23206	0.23557	0.20957	0.18666	0.16317	0.10635	0.05935	0.08516		13	0.17842	0.01705
147.5	0.22394	0.23221	0.17306	0.17565	0.24367	0.19044	0.22109	0.21676	0.19293	0.15653	0.10281	0.06957	0.08708		13	0.17583	0.01585
148	0.22068	0.23337	0.15708	0.16074	0.22299	0.204	0.2383	0.21398	0.20017	0.16962	0.07739	0.04704	0.09461		13	0.17231	0.01747
148.5	0.22211	0.2452	0.15243	0.16784	0.23284	0.21646	0.22202	0.21807	0.19413	0.16928	0.11283	0.07329	0.1069		13	0.17949	0.01515
149	0.22775	0.25815	0.17674	0.17321	0.24028	0.20599	0.22073	0.21253	0.189	0.17635	0.10633	0.05773	0.09367		13	0.17988	0.01668
149.5	0.2374	0.24843	0.15359	0.16851	0.23377	0.23029	0.22247	0.21357	0.18021	0.176	0.09258	0.0757	0.07955		13	0.17785	0.01712
150	0.23407	0.2395	0.15721	0.17256	0.2394	0.22886	0.22016	0.21234	0.18925	0.17222	0.10459	0.04277	0.08979		13	0.17713	0.0176
150.5	0.23707	0.23965	0.15411	0.17018	0.23609	0.22902	0.25006	0.21718	0.1864	0.16688	0.09302	0.0634	0.08716		13	0.17925	0.0178
151	0.23623	0.25303	0.15528	0.17256	0.2394	0.2285	0.24073	0.21057	0.18937	0.17389	0.10393	0.05977	0.07054		13	0.17952	0.01826
151.5	0.21974	0.26246	0.16186	0.17214	0.23881	0.22803	0.244	0.21158	0.19979	0.17405	0.10903	0.08657	0.0912		13	0.18456	0.0163
152	0.21943	0.24551	0.16912	0.16568	0.22985	0.19478	0.22892	0.20893	0.18458	0.1727	0.0988	0.06419	0.06939		13	0.17322	0.01676
152.5	0.22874	0.24496	0.16395	0.17966	0.24924	0.21881	0.23759	0.21076	0.19146	0.17191	0.12004	0.05677	0.09786		13	0.18244	0.01661
153	0.21553	0.2375	0.17736	0.17242	0.2392	0.21241	0.24633	0.21001	0.19918	0.18308	0.11411	0.0753	0.0798		13	0.18171	0.01605
153.5	0.21479	0.23681	0.15803	0.18063	0.25059	0.23759	0.22132	0.2099	0.20818	0.18045	0.10517	0.05745	0.10793		13	0.18222	0.01648
154	0.22742	0.26757	0.1678	0.17509	0.2429	0.21484	0.22522	0.21221	0.19614	0.17969	0.10524	0.06423	0.08814		13	0.18204	0.01717
154.5	0.23023	0.24025	0.17336	0.17718	0.24579	0.20532	0.23169	0.21371	0.19937	0.15581	0.11682	0.0748	0.08727		13	0.18089	0.01593
155	0.21149	0.2356	0.16736	0.17805	0.247	0.20106	0.23071	0.21525	0.17459	0.16134	0.10684	0.05908	0.0966		13	0.17577	0.01603
155.5	0.21444	0.25396	0.17006	0.16514	0.2291	0.2176	0.23974	0.22339	0.1787	0.17372	0.09207	0.06377	0.10199		13	0.17874	0.01672
156	0.21942	0.25467	0.17277	0.16785	0.23285	0.23131	0.2297	0.21698	0.19527	0.15465	0.10038	0.05545	0.08903		13	0.17849	0.01746
156.5	0.19976	0.2418	0.17096	0.17798	0.24691	0.21864	0.23274	0.21927	0.18172	0.17273	0.11853	0.09183	0.08803		13	0.18161	0.0149
157	0.21081	0.23456	0.1798	0.1691	0.23459	0.21843	0.2414	0.22231	0.18156	0.17666	0.11415	0.08765	0.09385		13	0.18191	0.01483
157.5	0.21879	0.24189	0.172	0.17088	0.23706	0.21421	0.24699	0.21915	0.18742	0.16046	0.10499	0.06723	0.10496		13	0.18046	0.01608
158	0.20882	0.23876	0.1664	0.1663	0.23071	0.21508	0.24339	0.21964	0.18358	0.15789	0.1153	0.08828	0.08915		13	0.17872	0.01506
158.5	0.21028	0.23503	0.18876	0.16066	0.22288	0.20367	0.24305	0.21852	0.21258	0.17493	0.10874	0.07859	0.10142		13	0.18147	0.01495
159	0.2047	0.24594	0.17563	0.1697	0.23542	0.21119	0.23211	0.21794	0.18642	0.16873	0.11915	0.05711	0.11933		13	0.18026	0.01518
159.5	0.22057	0.252	0.17523	0.1692	0.23472	0.2206	0.23949	0.21866	0.18884	0.17321	0.12698	0.07986	0.08537		13	0.18344	0.01569
160
160.5
161
161.5
162
162.5
163
163.5
164
164.5
165
165.5
166
166.5
167
167.5
168
168.5
169
169.5
170
170.5
171
171.5
172
172.5
173
173.5
174
174.5
175
175.5
176
176.5
177
177.5
178
178.5
179
179.5
180	0.24087	0.26273	0.1747	0.16857	0.25208	0.21916	0.23939	0.22665	0.18904	0.17617	0.12556	0.07897	0.08551		13	0.18765	0.0169
180.5	0.23908	0.25298	0.16551	0.16378	0.25859	0.21139	0.24957	0.22798	0.18593	0.16316	0.11547	0.06435	0.07927		13	0.18285	0.01817
181	0.23258	0.281	0.16343	0.15792	0.25337	0.20089	0.25234	0.23183	0.18339	0.14542	0.11828	0.06767	0.06946		13	0.18135	0.01916
181.5	0.2357	0.23816	0.17066	0.16362	0.24817	0.23297	0.23255	0.2352	0.20537	0.16464	0.13275	0.08012	0.06933		13	0.18532	0.017
182	0.23056	0.24957	0.16463	0.15928	0.27374	0.20498	0.24927	0.2292	0.19742	0.15605	0.13928	0.064	0.07475		13	0.18406	0.01818
182.5	0.23342	0.25653	0.18368	0.16691	0.26223	0.21473	0.25115	0.22229	0.1907	0.14326	0.13094	0.10105	0.07591		13	0.18714	0.01679
183	0.23865	0.23561	0.17478	0.17634	0.26637	0.20412	0.23781	0.2331	0.18853	0.17291	0.12875	0.08437	0.06657		13	0.18523	0.01702
183.5	0.232	0.24305	0.17414	0.17211	0.27552	0.22794	0.25211	0.23163	0.18547	0.17423	0.10143	0.08067	0.07721		13	0.18673	0.01828
184	0.25634	0.26125	0.179	0.17971	0.25026	0.20349	0.2628	0.23135	0.18266	0.15661	0.1251	0.08599	0.07127		13	0.18814	0.01804
184.5	0.24418	0.24936	0.17656	0.17126	0.25474	0.20929	0.23733	0.22758	0.18743	0.15535	0.12807	0.08012	0.06053		13	0.18322	0.01763
185	0.24133	0.26703	0.18431	0.17273	0.28202	0.23035	0.26166	0.23005	0.17884	0.16734	0.11076	0.0652	0.07085		13	0.18942	0.02
185.5	0.21977	0.24119	0.16989	0.18092	0.29034	0.18048	0.24071	0.22891	0.18599	0.17063	0.12501	0.09088	0.07553		13	0.18463	0.01706
186	0.21895	0.24043	0.14884	0.16376	0.253	0.20438	0.25011	0.23086	0.19392	0.17467	0.13396	0.09009	0.05924		13	0.18171	0.01695
186.5	0.2536	0.25682	0.19185	0.15433	0.27095	0.22666	0.25289	0.22744	0.19285	0.15708	0.14569	0.0776	0.06709		13	0.19037	0.01858
187	0.24038	0.25862	0.16738	0.17916	0.28295	0.20648	0.25297	0.22968	0.198	0.15485	0.13343	0.08191	0.0612		13	0.18823	0.01879
187.5	0.24341	0.26761	0.1796	0.15029	0.28347	0.21764	0.23033	0.23097	0.18688	0.15665	0.10646	0.06953	0.074		13	0.18437	0.01945
188	0.23997	0.24415	0.1623	0.18122	0.25952	0.22507	0.23067	0.22838	0.18188	0.17426	0.10696	0.07677	0.06387		13	0.18269	0.01803
188.5	0.20368	0.25057	0.162	0.1732	0.29369	0.20494	0.25402	0.22515	0.1813	0.1638	0.10918	0.0828	0.07433		13	0.18297	0.01839
189	0.24396	0.24926	0.15292	0.16954	0.26124	0.19118	0.24468	0.23343	0.17909	0.1648	0.11938	0.09301	0.06938		13	0.18245	0.01738
189.5	0.2505	0.246	0.19991	0.1738	0.28729	0.20801	0.2418	0.23799	0.17869	0.16255	0.13485	0.07822	0.0663		13	0.18969	0.01854
190	0.2162	0.23698	0.17435	0.16582	0.259	0.23435	0.2421	0.23234	0.16991	0.16882	0.12803	0.07751	0.07455		13	0.18307	0.01699
190.5	0.22914	0.25537	0.17123	0.16422	0.28387	0.23057	0.24191	0.23616	0.19506	0.15651	0.11067	0.07978	0.06058		13	0.18578	0.01932
191	0.24276	0.26745	0.17549	0.1659	0.28162	0.19222	0.25003	0.23298	0.18493	0.16787	0.11104	0.07788	0.05904		13	0.18532	0.01955
191.5	0.27119	0.2891	0.20014	0.1672	0.28491	0.23393	0.24326	0.23721	0.1849	0.1616	0.13079	0.0797	0.08091		13	0.19729	0.01973
192	0.24188	0.27988	0.2047	0.18408	0.29149	0.21781	0.25828	0.24386	0.19291	0.16662	0.1317	0.0957	0.0767		13	0.19889	0.01866
192.5	0.24688	0.27586	0.19234	0.1809	0.29501	0.22192	0.24672	0.24788	0.184	0.18822	0.12624	0.06623	0.0817		13	0.19645	0.0196
193	0.25111	0.27473	0.19856	0.17002	0.30714	0.24495	0.26588	0.25153	0.19481	0.16994	0.12436	0.07008	0.04784		13	0.19776	0.0221
193.5	0.23695	0.2817	0.19983	0.17034	0.30287	0.24715	0.27826	0.25625	0.20432	0.20511	0.12382	0.08635	0.07141		13	0.20495	0.02057
194	0.23059	0.30231	0.21721	0.18343	0.31711	0.25086	0.26411	0.26173	0.19323	0.18094	0.10511	0.07192	0.04109		13	0.20151	0.02365
194.5	0.24008	0.28483	0.20127	0.16811	0.32042	0.24434	0.27341	0.26571	0.19978	0.19168	0.13095	0.08547	0.05554		13	0.20474	0.02186
195	0.2678	0.29669	0.1941	0.17708	0.32971	0.25031	0.27692	0.26383	0.20204	0.19962	0.12189	0.07966	0.07458		13	0.21033	0.02247
195.5	0.26654	0.29248	0.1926	0.18055	0.30609	0.24645	0.28732	0.26748	0.20113	0.21038	0.10778	0.06921	0.07308		13	0.20778	0.02265
196	0.24578	0.28914	0.19104	0.18047	0.32664	0.25099	0.27517	0.26929	0.20178	0.2113	0.11635	0.08821	0.05999		13	0.20817	0.02235
196.5	0.25447	0.28112	0.19993	0.18841	0.33326	0.25411	0.26383	0.26967	0.19186	0.20558	0.13211	0.08426	0.06574		13	0.20956	0.02181
197	0.26522	0.30269	0.21814	0.18479	0.33423	0.23308	0.27437	0.27421	0.20404	0.20879	0.12743	0.0797	0.06854		13	0.21348	0.02268
197.5	0.26155	0.30465	0.19973	0.1977	0.34636	0.24305	0.28591	0.26973	0.21968	0.21692	0.13005	0.07814	0.06811		13	0.21704	0.02325
198	0.28436	0.29694	0.22133	0.1892	0.30999	0.25419	0.28644	0.27153	0.21133	0.21654	0.12713	0.07767	0.06519		13	0.2163	0.02266
198.5	0.28052	0.29123	0.18937	0.1856	0.32309	0.25708	0.28283	0.28052	0.21368	0.22738	0.11371	0.08139	0.0566		13	0.21408	0.02366
199	0.27129	0.30347	0.21711	0.20205	0.33985	0.26683	0.27871	0.27896	0.22139	0.20494	0.13229	0.09114	0.05262		13	0.22005	0.02347
199.5	0.27037	0.30793	0.20708	0.18444	0.31981	0.27251	0.28137	0.27831	0.22097	0.22085	0.14002	0.09514	0.07058		13	0.22072	0.02206
200	0.26439	0.30439	0.20901	0.18642	0.34296	0.28561	0.28895	0.27925	0.22261	0.21669	0.11763	0.06981	0.07474		13	0.22019	0.02431
200.5	0.25821	0.29548	0.20989	0.2013	0.3382	0.24153	0.28415	0.27994	0.21528	0.21545	0.14087	0.09918	0.06275		13	0.21863	0.02198
201	0.25454	0.3137	0.18307	0.19045	0.34557	0.28222	0.28752	0.28049	0.22341	0.2309	0.12821	0.09432	0.0626		13	0.22131	0.02391
201.5	0.24185	0.29796	0.20286	0.20269	0.36941	0.26797	0.28412	0.2745	0.22866	0.21898	0.12629	0.07527	0.05867		13	0.21917	0.02464
202	0.26946	0.31546	0.1918	0.20381	0.3229	0.2622	0.27591	0.27891	0.21533	0.22808	0.11972	0.08992	0.03719		13	0.21621	0.02427
202.5	0.2973	0.28705	0.18802	0.20246	0.33305	0.26467	0.29417	0.27527	0.2371	0.23078	0.14078	0.08204	0.0558		13	0.22219	0.02372
203	0.24054	0.30795	0.18674	0.19929	0.34889	0.2411	0.27046	0.27811	0.22198	0.20785	0.13202	0.08549	0.07128		13	0.21475	0.02271
203.5	0.26416	0.28153	0.19308	0.19951	0.34202	0.26361	0.282	0.28557	0.22221	0.22124	0.11483	0.0793	0.06859		13	0.21674	0.02341
204	0.28412	0.2992	0.18323	0.21159	0.32948	0.27393	0.28136	0.28141	0.22156	0.21916	0.11314	0.09878	0.07665		13	0.22105	0.02277
204.5	0.2738	0.30545	0.18489	0.19824	0.34266	0.27193	0.28322	0.28175	0.21317	0.23732	0.12068	0.08921	0.07641		13	0.22144	0.02339
205	0.2502	0.31353	0.20291	0.19946	0.35659	0.27596	0.27263	0.27925	0.21809	0.21889	0.12968	0.09317	0.06378		13	0.22109	0.02363
205.5	0.27268	0.30907	0.19166	0.20233	0.3751	0.27907	0.29362	0.28117	0.22485	0.23301	0.15369	0.07925	0.06903		13	0.22804	0.02466
206	0.27299	0.28686	0.19412	0.21418	0.3567	0.26427	0.28002	0.28464	0.22879	0.23106	0.13356	0.08167	0.06677		13	0.22274	0.02356
206.5	0.26918	0.3054	0.17211	0.20608	0.34796	0.29037	0.27696	0.28145	0.20877	0.23139	0.11212	0.09294	0.06933		13	0.22031	0.02419
207	0.29878	0.30812	0.19276	0.20506	0.35818	0.27628	0.28328	0.28635	0.2313	0.23261	0.13651	0.08726	0.07549		13	0.22861	0.02407
207.5	0.24071	0.28898	0.20348	0.19878	0.35386	0.26699	0.29904	0.29419	0.22758	0.23184	0.12617	0.09625	0.07255		13	0.22311	0.02317
208	0.26475	0.30151	0.19745	0.20832	0.33829	0.26808	0.29621	0.278	0.22277	0.23677	0.13504	0.08111	0.04735		13	0.2212	0.0242
208.5	0.26921	0.30093	0.16816	0.20731	0.34208	0.24354	0.28199	0.29301	0.22466	0.22879	0.13363	0.09917	0.07831		13	0.22083	0.02246
209	0.302	0.32183	0.17102	0.21628	0.36064	0.25314	0.28267	0.2922	0.22863	0.23219	0.12405	0.10668	0.05596		13	0.22671	0.02508
209.5	0.25315	0.2902	0.18691	0.20899	0.35792	0.27968	0.29803	0.2833	0.24169	0.24126	0.13006	0.08265	0.07706		13	0.22546	0.02373
210	0.26792	0.30264	0.18617	0.20582	0.36617	0.2746	0.28441	0.29104	0.25452	0.24457	0.12384	0.10888	0.07874		13	0.22995	0.02349
210.5	0.24725	0.29087	0.1765	0.20887	0.37977	0.26852	0.30065	0.2807	0.22013	0.24582	0.13405	0.10404	0.07466		13	0.22553	0.02376
211	0.26113	0.30934	0.18221	0.21218	0.34479	0.27111	0.29293	0.2845	0.2138	0.23636	0.12777	0.06703	0.07072		13	0.22107	0.02446
211.5	0.23332	0.30022	0.17055	0.19397	0.38408	0.26019	0.28384	0.28793	0.22816	0.22433	0.13481	0.08503	0.07482		13	0.2201	0.0245
212	0.24944	0.2963	0.16016	0.19987	0.35203	0.26671	0.28057	0.27923	0.23293	0.24819	0.12841	0.09986	0.06215		13	0.21968	0.0235
212.5	0.26038	0.29247	0.19618	0.21281	0.35947	0.27641	0.28261	0.28208	0.23535	0.21813	0.13289	0.08631	0.06819		13	0.22333	0.02355
213	0.25828	0.28862	0.18486	0.20109	0.34094	0.26726	0.26937	0.27455	0.23394	0.23494	0.14244	0.08868	0.06303		13	0.21908	0.02241
213.5	0.26638	0.28826	0.17424	0.20615	0.37061	0.26234	0.29598	0.28123	0.22421	0.2188	0.13756	0.08297	0.08069		13	0.22226	0.02375
214	0.27378	0.2969	0.17512	0.19979	0.34477	0.27391	0.27668	0.27858	0.22449	0.23327	0.13393	0.0855	0.07627		13	0.221	0.02302
214.5	0.27085	0.29988	0.16709	0.1882	0.34262	0.27303	0.28001	0.28514	0.22735	0.22616	0.13837	0.12133	0.05953		13	0.2215	0.02274
215	0.27928	0.28432	0.16539	0.19686	0.33845	0.26066	0.27267	0.27111	0.23664	0.22379	0.12116	0.10877	0.07686		13	0.21815	0.02194
215.5	0.24572	0.27438	0.16486	0.19421	0.34786	0.24581	0.28888	0.27743	0.22269	0.23594	0.14299	0.09808	0.06916		13	0.216	0.02207
216	0.27877	0.28765	0.17311	0.19968	0.33598	0.25063	0.2709	0.27501	0.22659	0.21337	0.12592	0.08131	0.08733		13	0.21587	0.0221
216.5	0.26144	0.2925	0.17551	0.19248	0.3323	0.26506	0.28176	0.27454	0.23054	0.21894	0.13451	0.08876	0.07254		13	0.21699	0.02228
217	0.25009	0.29634	0.19814	0.20968	0.34522	0.27212	0.28562	0.2786	0.22348	0.23501	0.12348	0.10647	0.09003		13	0.22417	0.02157
217.5	0.25823	0.29327	0.17432	0.20418	0.33595	0.27762	0.27591	0.28811	0.22357	0.21627	0.12326	0.07676	0.09094		13	0.21834	0.02268
218	0.28475	0.27449	0.17241	0.19227	0.3494	0.26047	0.27443	0.27691	0.2245	0.21901	0.12413	0.09842	0.07631		13	0.2175	0.02255
218.5	0.25225	0.29306	0.17666	0.19358	0.3548	0.26088	0.28208	0.28338	0.21343	0.23145	0.14099	0.08534	0.05445		13	0.2171	0.02382
219	0.26419	0.29271	0.16155	0.20036	0.35431	0.27668	0.28078	0.27767	0.22317	0.22592	0.14209	0.08581	0.08336		13	0.22066	0.02294
219.5	0.2514	0.30701	0.1693	0.19233	0.35558	0.26864	0.26479	0.28049	0.21212	0.23295	0.14568	0.11359	0.06949		13	0.22026	0.02237
220	0.24644	0.28239	0.19277	0.19376	0.34769	0.29175	0.26672	0.28075	0.22172	0.22918	0.15905	0.08774	0.07452		13	0.22111	0.02204
220.5	0.24757	0.28527	0.16262	0.20003	0.35395	0.27776	0.27685	0.26728	0.22558	0.22017	0.13218	0.09212	0.08437		13	0.21736	0.02234
221	0.26061	0.31796	0.17099	0.1927	0.34841	0.25466	0.27493	0.27663	0.22146	0.22602	0.12082	0.0917	0.08825		13	0.21886	0.02292
221.5	0.25285	0.29119	0.19428	0.19762	0.35801	0.26407	0.29322	0.2822	0.2158	0.21593	0.12382	0.09014	0.0928		13	0.22092	0.02262
222	0.25708	0.27911	0.17413	0.19425	0.34557	0.26597	0.26934	0.27661	0.2233	0.20847	0.15356	0.09128	0.07859		13	0.21671	0.0215
222.5	0.26565	0.29796	0.17332	0.19784	0.36458	0.25371	0.28491	0.27548	0.22271	0.21777	0.13531	0.0755	0.07407		13	0.21837	0.02395
223	0.26081	0.3015	0.18698	0.19474	0.36082	0.24341	0.27398	0.27571	0.21445	0.22373	0.13359	0.10512	0.06451		13	0.21841	0.02283
223.5	0.25039	0.30001	0.16467	0.18488	0.33191	0.26134	0.27249	0.26802	0.21095	0.21696	0.1389	0.09534	0.10325		13	0.21532	0.02064
224	0.27447	0.28946	0.18854	0.19811	0.36997	0.28214	0.28088	0.26994	0.20895	0.22111	0.12707	0.08789	0.09047		13	0.22223	0.02331
224.5	0.26553	0.31936	0.20372	0.19751	0.3644	0.27431	0.28406	0.27078	0.22583	0.22222	0.13119	0.10279	0.0717		13	0.22565	0.02354
225	0.25003	0.30778	0.17617	0.20254	0.36929	0.25944	0.27577	0.27741	0.22968	0.20587	0.14646	0.10368	0.08924		13	0.22257	0.02226
225.5	0.27103	0.3057	0.16113	0.20703	0.36305	0.27773	0.26768	0.27618	0.22581	0.2174	0.12974	0.08359	0.08333		13	0.22072	0.02379
226	0.23551	0.30141	0.18043	0.19065	0.35386	0.25824	0.28769	0.27368	0.21406	0.22215	0.14457	0.11301	0.07397		13	0.21917	0.02187
226.5	0.25326	0.29058	0.19129	0.19484	0.3437	0.2332	0.27432	0.27491	0.21434	0.21956	0.13586	0.10305	0.08549		13	0.21649	0.02083
227	0.24443	0.30363	0.16845	0.18897	0.35127	0.26111	0.26889	0.27141	0.22517	0.21825	0.13866	0.09205	0.0819		13	0.21648	0.02223
227.5	0.25216	0.31186	0.19314	0.20001	0.37381	0.25404	0.27823	0.27962	0.21809	0.22798	0.15057	0.09023	0.07876		13	0.22373	0.02318
228	0.2822	0.30177	0.17987	0.19067	0.35442	0.28196	0.26803	0.27817	0.22286	0.23688	0.13317	0.09215	0.08944		13	0.22397	0.02288
228.5	0.276	0.29585	0.17402	0.19581	0.3738	0.27521	0.27432	0.28345	0.22598	0.22498	0.13341	0.11645	0.07946		13	0.22529	0.02306
229	0.24815	0.3131	0.18261	0.18851	0.34556	0.27205	0.28092	0.27938	0.23482	0.22072	0.12668	0.10075	0.07162		13	0.22037	0.02303
229.5	0.24269	0.29812	0.18378	0.19309	0.3348	0.24601	0.27396	0.28353	0.23981	0.23533	0.11537	0.10477	0.0817		13	0.21792	0.02169
230	0.25678	0.31149	0.1824	0.18595	0.33243	0.2492	0.28783	0.26925	0.20835	0.22275	0.14329	0.11399	0.07905		13	0.21868	0.02117
230.5	0.27291	0.28932	0.20648	0.2003	0.33106	0.25591	0.27169	0.27415	0.21685	0.21798	0.12374	0.09774	0.06626		13	0.21726	0.02195
231	0.23812	0.31903	0.18929	0.2028	0.35609	0.24896	0.27678	0.27957	0.21375	0.23014	0.14417	0.09972	0.07757		13	0.22123	0.02238
231.5	0.28182	0.31565	0.17972	0.19931	0.35692	0.27277	0.2763	0.27284	0.22445	0.20938	0.15515	0.09455	0.09017		13	0.22531	0.02252
232	0.25878	0.31044	0.20755	0.19642	0.37535	0.28002	0.28146	0.27831	0.22823	0.22385	0.12491	0.11489	0.0922		13	0.22865	0.02276
232.5	0.2589	0.31123	0.20351	0.19863	0.34993	0.2316	0.2781	0.26763	0.22771	0.21465	0.13985	0.11363	0.0817		13	0.22131	0.02121
233	0.26178	0.29805	0.17623	0.19114	0.35464	0.24329	0.27633	0.27103	0.22308	0.23248	0.12679	0.10291	0.08723		13	0.21885	0.02196
233.5	0.27378	0.30477	0.20616	0.1863	0.34542	0.25231	0.29584	0.2741	0.22066	0.21369	0.12707	0.08819	0.07629		13	0.22035	0.02314
234	0.26526	0.33093	0.16805	0.20794	0.37971	0.28306	0.2808	0.27343	0.21207	0.21608	0.11896	0.11344	0.07342		13	0.22486	0.02481
234.5	0.28583	0.32029	0.19274	0.19905	0.38848	0.25055	0.27904	0.28352	0.2248	0.22395	0.14139	0.09981	0.0896		13	0.22916	0.02388
235	0.25779	0.32245	0.20711	0.20341	0.35614	0.25971	0.28103	0.2748	0.24364	0.21045	0.1399	0.11397	0.08686		13	0.22748	0.02185
235.5	0.24165	0.32536	0.21139	0.17845	0.34451	0.25878	0.275	0.27805	0.20125	0.23375	0.14175	0.10013	0.09334		13	0.2218	0.02175
236	0.28071	0.30413	0.19359	0.19527	0.36269	0.27031	0.2792	0.27574	0.22625	0.23148	0.13212	0.09006	0.08989		13	0.2255	0.02305
236.5	0.28519	0.33705	0.18138	0.19499	0.34053	0.27339	0.28461	0.27028	0.21261	0.21679	0.14819	0.11758	0.08167		13	0.22648	0.02242
237	0.27003	0.31594	0.20582	0.20363	0.33552	0.27046	0.28433	0.28129	0.2225	0.22292	0.14496	0.10326	0.0765		13	0.22594	0.02198
237.5	0.27235	0.31816	0.2158	0.19764	0.36649	0.26289	0.27988	0.28227	0.2194	0.22044	0.15182	0.09761	0.0666		13	0.22703	0.0235
238	0.25492	0.31267	0.21249	0.20487	0.37081	0.25721	0.2914	0.27569	0.22274	0.21958	0.1376	0.11395	0.08005		13	0.22723	0.02256
238.5	0.2735	0.32221	0.211	0.20122	0.37121	0.2659	0.28725	0.28154	0.22101	0.23783	0.12665	0.10317	0.08367		13	0.22971	0.02362
239	0.28227	0.31753	0.20994	0.22131	0.34244	0.28023	0.28979	0.27745	0.23661	0.23005	0.14813	0.08854	0.10756		13	0.23322	0.0217
239.5	0.28349	0.33903	0.19677	0.20908	0.34717	0.26153	0.28125	0.28929	0.21745	0.23408	0.14446	0.08895	0.06732		13	0.22768	0.02414
240	0.26891	0.31175	0.21086	0.20414	0.37926	0.27881	0.28098	0.28204	0.23045	0.22313	0.13236	0.11964	0.08342		13	0.23121	0.02299
240.5	0.26728	0.32072	0.20312	0.20502	0.35604	0.26911	0.27175	0.28438	0.23088	0.23911	0.14256	0.11562	0.09977		13	0.23118	0.02131
241	0.27545	0.34081	0.21142	0.20745	0.37031	0.27452	0.2638	0.27847	0.21414	0.22066	0.13992	0.09313	0.08021		13	0.22848	0.02401
241.5	0.28809	0.32249	0.20047	0.20316	0.36879	0.26951	0.27429	0.27403	0.2255	0.21334	0.13239	0.10654	0.07853		13	0.22747	0.0235
242	0.28933	0.32504	0.19595	0.20661	0.35962	0.27342	0.28555	0.28325	0.21984	0.22204	0.13755	0.11445	0.09425		13	0.2313	0.02255
242.5	0.28476	0.34071	0.21942	0.20483	0.35932	0.27113	0.28747	0.27535	0.21893	0.218	0.14478	0.12566	0.06151		13	0.23168	0.02355
243	0.29774	0.31372	0.20162	0.20677	0.34296	0.27598	0.26608	0.28306	0.22442	0.22242	0.14376	0.1014	0.09984		13	0.22921	0.02162
243.5	0.30462	0.31572	0.21027	0.20218	0.37851	0.28337	0.28469	0.28441	0.22987	0.21704	0.14603	0.1117	0.09637		13	0.23575	0.02315
244	0.27425	0.31054	0.2062	0.19282	0.39106	0.26043	0.27438	0.27843	0.21567	0.24664	0.14954	0.12304	0.06179		13	0.2296	0.02379
244.5	0.3003	0.32679	0.19501	0.20534	0.37994	0.22847	0.28337	0.28377	0.21772	0.24478	0.1317	0.10818	0.09971		13	0.23116	0.02351
245	0.30768	0.31111	0.21576	0.21301	0.35602	0.27309	0.28108	0.28007	0.2256	0.22504	0.13978	0.1164	0.09396		13	0.23374	0.02198
245.5	0.30371	0.31349	0.20372	0.21186	0.36647	0.25668	0.27462	0.28343	0.22814	0.22597	0.15717	0.09742	0.09402		13	0.23205	0.02249
246	0.27254	0.32868	0.21706	0.21065	0.37381	0.27831	0.26862	0.28146	0.24303	0.23184	0.11905	0.09632	0.09577		13	0.23209	0.02369
246.5	0.30753	0.31744	0.19902	0.21651	0.37465	0.27595	0.28772	0.27806	0.22588	0.22604	0.14854	0.08598	0.09581		13	0.23378	0.02385
247	0.26526	0.32679	0.21709	0.21772	0.36066	0.28736	0.28396	0.28211	0.21765	0.23112	0.14538	0.12304	0.0899		13	0.23446	0.02193
247.5	0.30634	0.31699	0.19673	0.20116	0.35846	0.26758	0.27171	0.28836	0.22963	0.21868	0.13815	0.1088	0.0849		13	0.22981	0.02302
248	0.2747	0.31369	0.22346	0.21329	0.364	0.24357	0.29107	0.28386	0.21261	0.22293	0.15885	0.1126	0.08899		13	0.23105	0.02166
248.5	0.26298	0.31663	0.18509	0.20882	0.37092	0.26665	0.28196	0.28621	0.22839	0.22324	0.13735	0.09931	0.08628		13	0.22722	0.02326
249	0.31027	0.3082	0.19534	0.21381	0.36473	0.26189	0.27174	0.28361	0.22785	0.22442	0.13724	0.10866	0.10651		13	0.23187	0.02213
249.5	0.2882	0.3287	0.21805	0.19758	0.35789	0.25499	0.29633	0.27371	0.22676	0.24036	0.14064	0.10835	0.0812		13	0.23175	0.02301
250
250.5
251
251.5
252
252.5
253
253.5
254
254.5
255
255.5
256
256.5
257
257.5
258
258.5
259
259.5
260
260.5
261
261.5
262
262.5
263
263.5
264
264.5
265
265.5
266
266.5
267
267.5
268
268.5
269
269.5
270	0.28679	0.31882	0.21665	0.19701	0.35537	0.27088	0.29571	0.27373	0.22832	0.24052	0.14123	0.10737	0.08714		13	0.23227	0.02256
270.5	0.29968	0.31748	0.19255	0.19744	0.375	0.26994	0.2946	0.27549	0.22953	0.25436	0.12166	0.12023	0.09917		13	0.2344	0.02335
271	0.30621	0.32418	0.18647	0.20256	0.36956	0.28229	0.29918	0.26997	0.24735	0.26087	0.12656	0.12933	0.10161		13	0.23893	0.02313
271.5	0.29626	0.31689	0.19893	0.19003	0.37704	0.26226	0.28807	0.27466	0.22872	0.25419	0.13663	0.11568	0.07612		13	0.23196	0.02382
272	0.31223	0.31695	0.18088	0.19648	0.36483	0.27044	0.29682	0.26611	0.22561	0.23689	0.1278	0.10319	0.08783		13	0.2297	0.02405
272.5	0.30092	0.33294	0.1664	0.18814	0.36536	0.2771	0.29776	0.26935	0.21797	0.25544	0.13558	0.10759	0.09164		13	0.23124	0.02427
273	0.27759	0.32517	0.18206	0.19281	0.37298	0.26826	0.29044	0.27433	0.21696	0.24541	0.121	0.11375	0.10698		13	0.22983	0.02313
273.5	0.28764	0.33874	0.20709	0.20093	0.38477	0.26402	0.29429	0.28134	0.21603	0.25267	0.14184	0.11876	0.09219		13	0.23695	0.0237
274	0.2651	0.32083	0.19158	0.19428	0.38883	0.28089	0.29336	0.26681	0.21484	0.2441	0.11814	0.0913	0.08589		13	0.22738	0.0251
274.5	0.28294	0.31264	0.19589	0.19863	0.3709	0.27471	0.29672	0.27544	0.22872	0.24346	0.13297	0.11068	0.09444		13	0.23217	0.02297
275	0.27004	0.32227	0.18779	0.19102	0.34745	0.26161	0.29587	0.27629	0.22157	0.25163	0.12784	0.11481	0.10193		13	0.22847	0.02197
275.5	0.25886	0.33614	0.21634	0.19712	0.35917	0.26599	0.29627	0.27283	0.21245	0.25603	0.13631	0.09489	0.09102		13	0.23026	0.02333
276	0.27758	0.3055	0.19668	0.18732	0.35553	0.26666	0.29248	0.26715	0.22976	0.23525	0.13113	0.13247	0.09255		13	0.22847	0.0214
276.5	0.2918	0.31097	0.21558	0.19379	0.35356	0.25563	0.30028	0.27183	0.23637	0.25563	0.13098	0.12563	0.08739		13	0.23303	0.02209
277	0.30368	0.33582	0.18653	0.18714	0.37732	0.28034	0.30494	0.2698	0.22954	0.23962	0.14527	0.11057	0.09327		13	0.23568	0.02423
277.5	0.27578	0.33518	0.21556	0.19976	0.32181	0.26982	0.28199	0.27488	0.226	0.25131	0.14062	0.11471	0.09477		13	0.23094	0.02104
278	0.29954	0.33025	0.20357	0.19785	0.38048	0.27197	0.30285	0.2687	0.2391	0.24405	0.15097	0.11643	0.08351		13	0.23764	0.02374
278.5	0.28995	0.31664	0.2056	0.20561	0.35726	0.26864	0.29332	0.27097	0.23286	0.24313	0.14898	0.11835	0.08349		13	0.23345	0.0221
279	0.28241	0.3258	0.19448	0.20046	0.35231	0.25747	0.29156	0.27078	0.21169	0.23621	0.11933	0.10676	0.09859		13	0.22676	0.02267
279.5	0.28108	0.3306	0.19892	0.18603	0.35215	0.24945	0.28313	0.27016	0.22369	0.25435	0.13492	0.09456	0.10051		13	0.22766	0.02266
280	0.27472	0.33156	0.18157	0.18009	0.34959	0.2579	0.29593	0.26385	0.21605	0.23074	0.13157	0.13184	0.09636		13	0.22629	0.02192
280.5	0.30268	0.31489	0.20001	0.19256	0.32873	0.26789	0.28912	0.2717	0.2146	0.24383	0.12734	0.12624	0.10852		13	0.22986	0.02083
281	0.29185	0.33412	0.22822	0.19856	0.33564	0.26351	0.28707	0.26711	0.22517	0.23026	0.116	0.12156	0.09113		13	0.23002	0.02217
281.5	0.29655	0.32114	0.21126	0.20389	0.36551	0.2562	0.29107	0.27	0.21577	0.24614	0.13232	0.14495	0.08739		13	0.23401	0.022
282	0.31171	0.34235	0.22048	0.21475	0.3779	0.2592	0.29159	0.27701	0.21403	0.25941	0.1297	0.10496	0.07503		13	0.23678	0.02514
282.5	0.30997	0.32818	0.21626	0.20814	0.3703	0.255	0.28689	0.27442	0.20676	0.23508	0.14531	0.12982	0.09349		13	0.23535	0.0224
283	0.28682	0.33266	0.1983	0.20108	0.40574	0.26977	0.30649	0.28357	0.22061	0.2662	0.13726	0.12627	0.09408		13	0.24068	0.02462
283.5	0.2689	0.36297	0.21605	0.19667	0.37042	0.24833	0.32401	0.28621	0.22243	0.2635	0.14382	0.11441	0.09023		13	0.23907	0.02441
284	0.30634	0.35678	0.19483	0.22297	0.35293	0.27974	0.30272	0.28574	0.23008	0.25675	0.13003	0.10815	0.09608		13	0.24024	0.02419
284.5	0.29363	0.35642	0.20011	0.21575	0.39605	0.26503	0.31584	0.28933	0.21301	0.26466	0.12961	0.11323	0.09353		13	0.24202	0.02567
285	0.27785	0.35373	0.20529	0.19587	0.40745	0.27635	0.31189	0.2868	0.22164	0.267	0.13624	0.1091	0.09261		13	0.24168	0.02593
285.5	0.31559	0.35453	0.20086	0.21194	0.38504	0.25033	0.30624	0.28716	0.24014	0.27142	0.14381	0.12925	0.08355		13	0.24461	0.02476
286	0.30556	0.3378	0.22838	0.21593	0.38945	0.27565	0.31142	0.28594	0.2292	0.27924	0.13488	0.1039	0.08227		13	0.24459	0.02547
286.5	0.30167	0.3386	0.20543	0.215	0.39419	0.26247	0.27716	0.29222	0.22858	0.27011	0.12384	0.10354	0.09821		13	0.23931	0.02493
287	0.28229	0.34568	0.20215	0.21326	0.40172	0.28821	0.30741	0.29351	0.23497	0.28112	0.13622	0.11473	0.09289		13	0.2457	0.02537
287.5	0.28905	0.35609	0.20758	0.20495	0.40277	0.28283	0.30109	0.29069	0.22326	0.27497	0.13894	0.12001	0.09516		13	0.24518	0.02526
288	0.29271	0.37047	0.21695	0.21148	0.40833	0.28822	0.31847	0.29422	0.22366	0.28787	0.15184	0.13698	0.11801		13	0.25532	0.02451
288.5	0.30003	0.36063	0.20883	0.20047	0.3776	0.26688	0.29133	0.29411	0.22062	0.27996	0.12589	0.11679	0.08941		13	0.24097	0.02516
289	0.31398	0.34766	0.20147	0.20798	0.4228	0.26119	0.2974	0.29245	0.23387	0.29798	0.14278	0.0973	0.10989		13	0.24821	0.0264
289.5	0.29336	0.37375	0.19566	0.20742	0.38259	0.27254	0.29681	0.29575	0.23186	0.28547	0.12471	0.11094	0.09542		13	0.24356	0.02586
290	0.2833	0.37301	0.21917	0.21671	0.39775	0.29505	0.31386	0.29153	0.22627	0.27688	0.15402	0.13632	0.09878		13	0.25251	0.02457
290.5	0.30208	0.36944	0.20697	0.21093	0.39002	0.27029	0.30675	0.29689	0.2311	0.28641	0.14004	0.12444	0.0966		13	0.24861	0.02517
291	0.27204	0.36807	0.21172	0.21386	0.42746	0.29453	0.32026	0.29704	0.22228	0.28244	0.14199	0.11831	0.09503		13	0.25116	0.02687
291.5	0.29626	0.3643	0.21466	0.22368	0.40405	0.25916	0.30726	0.29546	0.23206	0.28215	0.14529	0.13971	0.09275		13	0.25052	0.02474
292	0.27137	0.36543	0.20257	0.21844	0.40299	0.27813	0.32048	0.29951	0.22606	0.30693	0.10974	0.11333	0.10169		13	0.24744	0.02688
292.5	0.28648	0.37001	0.18473	0.21852	0.39707	0.28911	0.30883	0.29847	0.24881	0.27323	0.12337	0.13784	0.08338		13	0.24768	0.02616
293	0.2995	0.37084	0.21867	0.2132	0.40302	0.27455	0.29946	0.29596	0.22833	0.30642	0.1571	0.13768	0.08717		13	0.25322	0.02522
293.5	0.28	0.33545	0.20958	0.22592	0.42315	0.2695	0.31151	0.29478	0.23192	0.29934	0.13866	0.13078	0.06398		13	0.24727	0.02661
294	0.30072	0.36842	0.19137	0.2191	0.40405	0.26749	0.30735	0.29779	0.242	0.30045	0.13636	0.11185	0.08759		13	0.24881	0.02674
294.5	0.30942	0.36281	0.18812	0.23096	0.40284	0.29228	0.31532	0.29881	0.22864	0.29829	0.13269	0.13595	0.09764		13	0.25337	0.02593
295	0.28414	0.35101	0.2122	0.22021	0.39434	0.29664	0.30306	0.30245	0.25201	0.29788	0.15971	0.12228	0.0914		13	0.25287	0.02456
295.5	0.29643	0.36127	0.2021	0.2157	0.40468	0.27947	0.30867	0.29458	0.22678	0.28582	0.11527	0.13321	0.07129		13	0.24579	0.02698
296	0.28213	0.39658	0.19258	0.23054	0.41549	0.25588	0.31229	0.30252	0.22888	0.29711	0.1512	0.11611	0.10268		13	0.25262	0.02682
296.5	0.30292	0.35656	0.2115	0.23225	0.44753	0.29696	0.33359	0.29932	0.23347	0.30162	0.11792	0.12589	0.10796		13	0.25904	0.02791
297	0.27788	0.38234	0.19169	0.2067	0.41646	0.27368	0.30128	0.298	0.23071	0.30352	0.12926	0.13006	0.08765		13	0.2484	0.02719
297.5	0.28435	0.37717	0.22305	0.20326	0.41444	0.28824	0.31196	0.3029	0.24317	0.29504	0.12683	0.13506	0.10152		13	0.25438	0.02627
298	0.29741	0.3733	0.19229	0.20982	0.40705	0.25931	0.29802	0.30021	0.23009	0.3016	0.12954	0.11233	0.10186		13	0.24714	0.02659
298.5	0.31507	0.37055	0.17544	0.2193	0.42891	0.26154	0.31192	0.30384	0.22655	0.29299	0.14468	0.1162	0.10793		13	0.25192	0.02723
299	0.27237	0.36953	0.17244	0.21915	0.41298	0.2731	0.31527	0.30551	0.24105	0.30873	0.11849	0.12628	0.08467		13	0.24766	0.02769
299.5	0.30381	0.36092	0.18466	0.2354	0.44982	0.28939	0.30166	0.30428	0.22965	0.29145	0.12735	0.12121	0.10264		13	0.25402	0.02797
300	0.27017	0.36953	0.1702	0.22294	0.41728	0.25334	0.32694	0.29512	0.21689	0.3025	0.15071	0.12845	0.10759		13	0.24859	0.02613
300.5	0.29247	0.34878	0.17708	0.22312	0.42262	0.26978	0.32307	0.30402	0.24531	0.30692	0.1424	0.12018	0.11478		13	0.25312	0.02605
301	0.27473	0.37603	0.19507	0.21185	0.40353	0.29933	0.32969	0.30552	0.23528	0.2874	0.14036	0.12777	0.09815		13	0.25267	0.02631
301.5	0.27912	0.36683	0.19227	0.21441	0.42015	0.27243	0.32528	0.30321	0.23366	0.29173	0.1238	0.13219	0.09619		13	0.2501	0.02686
302	0.2676	0.36352	0.17998	0.20482	0.44991	0.26918	0.32607	0.29737	0.24305	0.2927	0.1364	0.11187	0.08596		13	0.24834	0.02878
302.5	0.26767	0.37064	0.17229	0.21187	0.40089	0.25668	0.32855	0.29636	0.22252	0.29096	0.12037	0.11419	0.09746		13	0.24234	0.02699
303	0.27884	0.34511	0.19459	0.21266	0.41176	0.27462	0.31264	0.29987	0.23015	0.27757	0.12289	0.12618	0.10702		13	0.24569	0.02537
303.5	0.27985	0.36771	0.18933	0.22021	0.39189	0.29419	0.31906	0.30336	0.2381	0.28396	0.12435	0.14199	0.11086		13	0.25114	0.02495
304	0.27604	0.35431	0.16978	0.21424	0.40567	0.24968	0.32175	0.2948	0.23974	0.26847	0.15165	0.11541	0.11813		13	0.24459	0.02479
304.5	0.27126	0.34201	0.17209	0.21575	0.39879	0.29994	0.31804	0.30064	0.25143	0.27982	0.13295	0.14231	0.09679		13	0.24783	0.02501
305	0.27287	0.37562	0.18589	0.22372	0.43397	0.26209	0.30795	0.29737	0.22346	0.27405	0.1366	0.13343	0.1005		13	0.24827	0.02664
305.5	0.26594	0.35429	0.16846	0.19794	0.39667	0.26104	0.33001	0.28665	0.22506	0.27329	0.13993	0.11831	0.10047		13	0.23985	0.02551
306	0.25798	0.36056	0.16828	0.20264	0.39999	0.27858	0.30661	0.28784	0.2321	0.2785	0.14333	0.12348	0.0883		13	0.24063	0.02566
306.5	0.28288	0.34528	0.19573	0.20451	0.39807	0.28129	0.32128	0.28432	0.22144	0.27786	0.15012	0.12347	0.09317		13	0.24457	0.02482
307	0.29449	0.35537	0.19141	0.22155	0.37356	0.29175	0.3099	0.2904	0.2377	0.27959	0.14946	0.13106	0.08813		13	0.24726	0.02414
307.5	0.2706	0.35625	0.17297	0.21803	0.40763	0.24989	0.31717	0.28809	0.23453	0.25869	0.12916	0.12698	0.09727		13	0.24056	0.02553
308	0.27668	0.35258	0.18213	0.21414	0.38864	0.27258	0.32903	0.29404	0.24337	0.27838	0.14165	0.14496	0.09691		13	0.24731	0.02429
308.5	0.25905	0.33978	0.16716	0.20831	0.38868	0.24906	0.30527	0.28908	0.20767	0.28043	0.12936	0.13056	0.10374		13	0.23524	0.02411
309	0.26863	0.35518	0.17275	0.20457	0.40387	0.27948	0.32033	0.29443	0.24322	0.30042	0.14331	0.12656	0.10085		13	0.2472	0.0256
309.5	0.29559	0.35548	0.18911	0.19847	0.3979	0.29061	0.29476	0.29203	0.21772	0.27776	0.13415	0.13028	0.09968		13	0.24412	0.02514
310	0.26218	0.35229	0.16612	0.22213	0.43071	0.28525	0.30187	0.29167	0.21599	0.29781	0.1293	0.14719	0.09143		13	0.24569	0.02658
310.5	0.25969	0.36458	0.16888	0.21323	0.39007	0.25757	0.29563	0.29247	0.23204	0.2902	0.14819	0.14792	0.08095		13	0.24165	0.02469
311	0.26366	0.35317	0.17457	0.21372	0.40262	0.27483	0.31824	0.28912	0.23333	0.28138	0.12642	0.12592	0.08282		13	0.24152	0.02617
311.5	0.26159	0.36208	0.21758	0.20848	0.40385	0.2635	0.31089	0.28929	0.22567	0.26767	0.12376	0.14052	0.09852		13	0.24411	0.02479
312	0.27588	0.36342	0.17548	0.21996	0.37244	0.28669	0.3075	0.29204	0.23306	0.2708	0.13552	0.13551	0.10067		13	0.24377	0.02404
312.5	0.25502	0.34428	0.18279	0.206	0.37805	0.27482	0.30133	0.28992	0.2324	0.26675	0.14353	0.14081	0.09124		13	0.239	0.02322
313	0.23882	0.38356	0.16487	0.20974	0.38788	0.29877	0.30815	0.29279	0.23684	0.28905	0.13837	0.14812	0.08546		13	0.2448	0.02591
313.5	0.2766	0.35403	0.17649	0.2087	0.38744	0.28794	0.31133	0.29198	0.23665	0.27968	0.15949	0.12246	0.08351		13	0.24433	0.02498
314	0.28431	0.33778	0.1727	0.20796	0.38829	0.25912	0.29785	0.29535	0.23103	0.27307	0.13792	0.13421	0.10128		13	0.24007	0.02373
314.5	0.28135	0.36291	0.17762	0.21235	0.37774	0.25656	0.30687	0.28895	0.23021	0.26968	0.15934	0.14246	0.08835		13	0.24265	0.02368
315	0.2881	0.35607	0.17666	0.20433	0.40354	0.26812	0.29144	0.28224	0.24943	0.27494	0.14862	0.13686	0.10656		13	0.24515	0.02412
315.5	0.28443	0.35619	0.17547	0.21224	0.40259	0.27689	0.29982	0.29781	0.23501	0.27294	0.15211	0.13879	0.09554		13	0.24614	0.02462
316	0.26011	0.36338	0.19777	0.20767	0.36542	0.27419	0.30874	0.29168	0.23443	0.27507	0.14478	0.13405	0.09733		13	0.24266	0.02328
316.5	0.29026	0.35824	0.18466	0.20276	0.38826	0.27278	0.29636	0.29326	0.23418	0.27963	0.15867	0.13997	0.09692		13	0.24584	0.02379
317	0.27193	0.36309	0.19324	0.20897	0.39812	0.25505	0.32613	0.2909	0.23827	0.28554	0.16116	0.1453	0.08738		13	0.24808	0.02458
317.5	0.27051	0.36269	0.1836	0.19726	0.37454	0.28443	0.30663	0.28833	0.24732	0.28678	0.1709	0.15669	0.09943		13	0.24839	0.02274
318	0.2682	0.34868	0.18223	0.18739	0.41388	0.2597	0.30097	0.29484	0.23962	0.292	0.15213	0.1599	0.09322		13	0.2456	0.02455
318.5	0.28378	0.35608	0.18203	0.1998	0.38446	0.27406	0.3099	0.29861	0.24821	0.28499	0.14643	0.11866	0.10585		13	0.2456	0.02453
319	0.28225	0.36415	0.1982	0.20944	0.37534	0.26192	0.30124	0.28835	0.25577	0.28294	0.15363	0.14616	0.08756		13	0.24669	0.02345
319.5	0.27337	0.35757	0.1802	0.20243	0.38653	0.26745	0.27923	0.28649	0.22529	0.27436	0.14119	0.12681	0.09545		13	0.23818	0.02411
320	0.27577	0.33968	0.16916	0.21773	0.38538	0.27691	0.29849	0.29689	0.24278	0.26933	0.14117	0.13257	0.10148		13	0.2421	0.02364
320.5	0.27302	0.36698	0.18634	0.20173	0.4044	0.26753	0.30215	0.29602	0.23683	0.26526	0.14041	0.14859	0.10531		13	0.24574	0.02441
321	0.28645	0.36441	0.14419	0.19551	0.39343	0.28295	0.29946	0.29724	0.24233	0.28767	0.1482	0.15075	0.09082		13	0.24488	0.02552
321.5	0.30343	0.36596	0.17772	0.21927	0.38748	0.26107	0.30933	0.29249	0.23868	0.27678	0.11948	0.13735	0.10009		13	0.24532	0.02527
322	0.29528	0.37264	0.15509	0.20921	0.37374	0.26401	0.30491	0.29383	0.22926	0.28036	0.15633	0.1391	0.09873		13	0.24404	0.02442
322.5	0.29427	0.36316	0.14713	0.19973	0.37944	0.30162	0.29054	0.29757	0.23296	0.28727	0.14598	0.13023	0.10682		13	0.24436	0.02508
323	0.26038	0.36742	0.15361	0.20928	0.41139	0.25217	0.29002	0.28779	0.23155	0.28456	0.1423	0.13043	0.10826		13	0.2407	0.02536
323.5	0.29279	0.36515	0.18421	0.21926	0.40927	0.25693	0.29596	0.28975	0.24466	0.27931	0.15671	0.15096	0.09919		13	0.24955	0.02423
324	0.28766	0.33624	0.18196	0.20501	0.39078	0.28115	0.30816	0.28972	0.22961	0.27268	0.16099	0.14493	0.08041		13	0.24379	0.02394
324.5	0.30374	0.35456	0.18883	0.21034	0.40135	0.27252	0.301	0.28929	0.23465	0.28171	0.14367	0.14945	0.08423		13	0.24733	0.0249
325	0.26876	0.35403	0.17314	0.21762	0.40244	0.28127	0.29639	0.28912	0.22394	0.27655	0.13126	0.13228	0.11212		13	0.24299	0.02451
325.5	0.28939	0.35323	0.19373	0.20187	0.37505	0.26098	0.28977	0.29342	0.24215	0.27814	0.16694	0.14816	0.10306		13	0.24584	0.02213
326	0.28578	0.35998	0.19288	0.22042	0.37228	0.28612	0.30001	0.29775	0.2321	0.28201	0.16058	0.14993	0.10489		13	0.2496	0.0225
326.5	0.30512	0.3458	0.17957	0.20848	0.39412	0.27851	0.29178	0.28387	0.23377	0.26735	0.14172	0.14796	0.10936		13	0.24519	0.02342
327	0.28447	0.37143	0.18949	0.21313	0.38168	0.2768	0.30607	0.29794	0.24046	0.2886	0.15962	0.14589	0.08899		13	0.24958	0.02415
327.5	0.31564	0.37085	0.18738	0.21502	0.39103	0.25658	0.28789	0.29035	0.24095	0.28922	0.15944	0.15164	0.10499		13	0.25084	0.02369
328	0.28291	0.36983	0.20223	0.20403	0.40944	0.27171	0.30206	0.29096	0.22429	0.27674	0.15662	0.13508	0.10741		13	0.24872	0.02451
328.5	0.29845	0.38243	0.17904	0.20095	0.40368	0.24794	0.29522	0.29326	0.21684	0.28375	0.1584	0.13813	0.09619		13	0.24571	0.0255
329	0.25699	0.36049	0.17541	0.2164	0.40922	0.27436	0.30614	0.29119	0.22427	0.26903	0.15256	0.14072	0.10347		13	0.24464	0.02446
329.5	0.26757	0.36975	0.19095	0.20758	0.393	0.28263	0.30214	0.29818	0.21829	0.26947	0.15509	0.12622	0.09138		13	0.24402	0.02492
330	0.26477	0.36184	0.20018	0.2057	0.40185	0.26904	0.29938	0.29817	0.24746	0.2877	0.14369	0.15309	0.09628		13	0.2484	0.02416
330.5	0.2938	0.37939	0.1985	0.20469	0.40189	0.30119	0.28844	0.28743	0.23268	0.28697	0.14445	0.13154	0.09023		13	0.24932	0.02586
331	0.28211	0.37375	0.18355	0.20908	0.3824	0.27324	0.2948	0.28458	0.22964	0.26717	0.16311	0.13024	0.09673		13	0.24388	0.02393
331.5	0.26461	0.37667	0.19069	0.20149	0.40761	0.24702	0.31031	0.29413	0.23943	0.28231	0.14766	0.1379	0.09789		13	0.24598	0.02528
332	0.30757	0.37942	0.20135	0.20938	0.42306	0.26505	0.3086	0.29337	0.24517	0.27123	0.15801	0.1414	0.08678		13	0.25311	0.02617
332.5	0.2979	0.3711	0.20318	0.20299	0.41689	0.27664	0.28952	0.29239	0.23065	0.28083	0.16934	0.13501	0.10024		13	0.25128	0.0249
333	0.30071	0.3754	0.18688	0.19566	0.42317	0.28693	0.29384	0.29282	0.22952	0.27976	0.14033	0.13739	0.11021		13	0.2502	0.02605
333.5	0.28437	0.3655	0.19281	0.21082	0.40183	0.27779	0.2954	0.29043	0.23136	0.29355	0.17001	0.13226	0.10583		13	0.25015	0.02404
334	0.28982	0.37634	0.18971	0.20603	0.40124	0.27093	0.30649	0.29455	0.24372	0.2852	0.15797	0.14489	0.11283		13	0.25229	0.02417
334.5	0.27925	0.36557	0.18969	0.20636	0.40803	0.27907	0.29996	0.29711	0.21583	0.29015	0.17427	0.13887	0.10912		13	0.25025	0.02415
335	0.29493	0.3819	0.20853	0.21593	0.39027	0.26867	0.2928	0.29242	0.20781	0.29118	0.1497	0.14575	0.09296		13	0.24868	0.02468
335.5	0.28071	0.3663	0.18517	0.20578	0.42835	0.27131	0.28705	0.28896	0.23108	0.28734	0.16127	0.1554	0.11927		13	0.25138	0.02421
336	0.25873	0.37924	0.18708	0.19567	0.39546	0.29539	0.29587	0.2982	0.23081	0.27654	0.15426	0.15267	0.10061		13	0.24773	0.02446
336.5	0.28417	0.36024	0.18739	0.19741	0.42144	0.28783	0.29691	0.29904	0.22697	0.2843	0.15157	0.134	0.08715		13	0.24757	0.02616
337	0.30195	0.36111	0.18054	0.20392	0.4333	0.28111	0.28655	0.29514	0.24713	0.29039	0.14502	0.13166	0.09088		13	0.2499	0.02678
337.5	0.28229	0.35543	0.17867	0.2014	0.43681	0.25569	0.29102	0.29168	0.21763	0.28204	0.16748	0.15776	0.09268		13	0.24697	0.02532
338	0.30444	0.36385	0.199	0.21622	0.40373	0.27702	0.29941	0.29637	0.23655	0.29439	0.15744	0.1484	0.09525		13	0.25324	0.02448
338.5	0.29852	0.36435	0.20171	0.217	0.41171	0.26923	0.31048	0.28851	0.24888	0.29043	0.15097	0.15061	0.10446		13	0.25437	0.02439
339	0.2867	0.37271	0.21095	0.21032	0.39516	0.27163	0.2916	0.29039	0.23833	0.28131	0.16214	0.14984	0.10354		13	0.25112	0.0233
339.5	0.27437	0.38091	0.18086	0.22226	0.42308	0.2573	0.30651	0.29175	0.23632	0.28157	0.16113	0.14926	0.10542		13	0.2516	0.02511
340
340.5
341
341.5
342
342.5
343
343.5
344
344.5
345
345.5
346
346.5
347
347.5
348
348.5
349
349.5
350
350.5
351
351.5
352
352.5
353
353.5
354
354.5
355
355.5
356
356.5
357
357.5
358
358.5
359
359.5
360	0.27451	0.38665	0.17491	0.22509	0.43612	0.27755	0.3044	0.29159	0.23741	0.28137	0.16014	0.14813	0.10729		13	0.25424	0.02599
360.5	0.27184	0.38746	0.16729	0.22371	0.445	0.29382	0.32083	0.3002	0.2466	0.28665	0.16433	0.1525	0.11632		13	0.25973	0.02646
361	0.25703	0.38574	0.18364	0.22982	0.43309	0.26404	0.30691	0.309	0.2339	0.28051	0.15446	0.14424	0.13175		13	0.25493	0.02518
361.5	0.24106	0.39009	0.15534	0.2104	0.41548	0.27227	0.29588	0.29737	0.23509	0.27936	0.16624	0.14162	0.10847		13	0.24682	0.0256
362	0.26772	0.40042	0.18449	0.22345	0.45628	0.28671	0.28856	0.30084	0.24571	0.28611	0.16925	0.14437	0.111		13	0.25884	0.02694
362.5	0.29122	0.39036	0.2047	0.23524	0.43026	0.27252	0.29686	0.29981	0.24576	0.29572	0.15137	0.11721	0.11929		13	0.25772	0.02621
363	0.25754	0.36434	0.17227	0.21208	0.42651	0.27367	0.30999	0.30012	0.23041	0.26917	0.14118	0.15924	0.10753		13	0.248	0.02526
363.5	0.26717	0.38847	0.19777	0.22838	0.43322	0.28015	0.29605	0.29392	0.24349	0.27521	0.17113	0.12729	0.11962		13	0.25553	0.02529
364	0.27272	0.37806	0.17279	0.21523	0.43335	0.26179	0.28934	0.2939	0.23295	0.28225	0.13419	0.15384	0.10556		13	0.24815	0.02608
364.5	0.25748	0.38589	0.18789	0.22299	0.40049	0.28226	0.29385	0.29722	0.23522	0.27772	0.15383	0.13974	0.11294		13	0.24981	0.0243
365	0.27308	0.3693	0.20023	0.22522	0.42467	0.27966	0.30115	0.3017	0.23964	0.27017	0.15011	0.14951	0.12313		13	0.25443	0.02415
365.5	0.28954	0.38158	0.19484	0.20944	0.44329	0.28256	0.31284	0.29251	0.25145	0.27193	0.1556	0.12471	0.11711		13	0.25595	0.02656
366	0.26253	0.38277	0.1691	0.20872	0.43782	0.2707	0.30973	0.28997	0.25049	0.26594	0.16147	0.15004	0.10714		13	0.25126	0.02599
366.5	0.2719	0.39396	0.18436	0.21302	0.4355	0.28635	0.2965	0.29927	0.23739	0.27832	0.14891	0.15427	0.12383		13	0.25566	0.0257
367	0.27507	0.38768	0.17567	0.20848	0.41998	0.25762	0.29772	0.29202	0.24946	0.27435	0.16002	0.14274	0.11189		13	0.25021	0.0252
367.5	0.26901	0.40889	0.18986	0.21937	0.42082	0.26369	0.28266	0.29388	0.24629	0.27264	0.14433	0.13709	0.11165		13	0.25078	0.02608
368	0.27192	0.3915	0.17364	0.21016	0.41168	0.2761	0.31106	0.29335	0.23982	0.2661	0.14404	0.13182	0.12311		13	0.24956	0.02557
368.5	0.27426	0.37132	0.18303	0.20742	0.42614	0.27794	0.30478	0.28863	0.25418	0.28333	0.12986	0.14475	0.1212		13	0.2513	0.02546
369	0.27624	0.35937	0.16375	0.20897	0.42557	0.27447	0.31496	0.29373	0.24677	0.28522	0.16077	0.13449	0.1175		13	0.25091	0.02525
369.5	0.25916	0.36607	0.17487	0.22436	0.39712	0.26033	0.30852	0.29494	0.24193	0.2649	0.15548	0.14059	0.0968		13	0.245	0.0242
370	0.277	0.39335	0.17879	0.21858	0.41164	0.28288	0.31672	0.29389	0.23896	0.26247	0.13993	0.15407	0.11295		13	0.2524	0.02547
370.5	0.25307	0.37671	0.1732	0.21498	0.41567	0.24719	0.3031	0.29237	0.23462	0.2585	0.14109	0.1528	0.1082		13	0.24396	0.02487
371	0.2745	0.37846	0.17599	0.22263	0.44207	0.26602	0.30564	0.29284	0.2389	0.26669	0.12706	0.14129	0.12074		13	0.25022	0.02649
371.5	0.25044	0.37789	0.20256	0.2245	0.42448	0.2853	0.28918	0.29412	0.21647	0.26879	0.13376	0.13253	0.13705		13	0.24901	0.0248
372	0.28066	0.39783	0.19497	0.2172	0.43715	0.27237	0.29682	0.2906	0.24537	0.26673	0.15175	0.14324	0.09844		13	0.25332	0.02661
372.5	0.29476	0.39387	0.16756	0.21683	0.41949	0.29513	0.31253	0.29642	0.23846	0.27654	0.14214	0.13578	0.10506		13	0.25343	0.02701
373	0.26097	0.38474	0.18144	0.22543	0.42447	0.27503	0.31928	0.29803	0.2371	0.28364	0.14541	0.15541	0.10491		13	0.25353	0.0258
373.5	0.28504	0.39129	0.16206	0.23681	0.43544	0.25744	0.29829	0.29802	0.24665	0.28175	0.17432	0.14456	0.12425		13	0.25661	0.02548
374	0.27522	0.39812	0.1914	0.22525	0.43566	0.28647	0.3094	0.29387	0.23515	0.28292	0.16272	0.12488	0.1232		13	0.25725	0.02629
374.5	0.28998	0.40994	0.21427	0.22792	0.44455	0.28749	0.29751	0.29341	0.23266	0.28443	0.15373	0.14596	0.1201		13	0.26169	0.02644
375	0.26144	0.40796	0.17659	0.21758	0.40999	0.27832	0.28501	0.29601	0.26748	0.27934	0.14185	0.12488	0.11305		13	0.25073	0.02638
375.5	0.25845	0.38415	0.16797	0.2254	0.43129	0.30027	0.29704	0.29649	0.23555	0.2672	0.13768	0.12979	0.1016		13	0.24868	0.02712
376	0.24402	0.398	0.19058	0.22578	0.443	0.2891	0.30853	0.29747	0.23854	0.28739	0.16383	0.14499	0.13216		13	0.25872	0.02574
376.5	0.27282	0.41782	0.18734	0.22907	0.43489	0.30095	0.29901	0.30267	0.23751	0.30381	0.14617	0.15831	0.12182		13	0.26248	0.02675
377	0.26569	0.41273	0.16637	0.21938	0.42553	0.2661	0.30167	0.30495	0.24849	0.27441	0.15494	0.14692	0.11214		13	0.25379	0.02661
377.5	0.25005	0.41362	0.18396	0.22709	0.43518	0.29671	0.30803	0.30085	0.25191	0.29041	0.14387	0.15368	0.0928		13	0.25755	0.02776
378	0.26482	0.41633	0.18411	0.2145	0.43778	0.28513	0.30787	0.30714	0.24792	0.28382	0.16283	0.13036	0.11416		13	0.25821	0.02741
378.5	0.27304	0.41879	0.17343	0.22738	0.4314	0.27273	0.31302	0.30302	0.23686	0.29988	0.14523	0.1524	0.11689		13	0.25877	0.02721
379	0.26396	0.41806	0.1671	0.22744	0.44167	0.29667	0.29776	0.30357	0.23163	0.29073	0.1712	0.12841	0.10896		13	0.25747	0.02797
379.5	0.26683	0.42116	0.17364	0.23177	0.43248	0.27979	0.3114	0.29839	0.22352	0.28621	0.17095	0.15137	0.12684		13	0.25956	0.02631
380	0.24649	0.41589	0.16656	0.21852	0.43972	0.29575	0.29098	0.29105	0.24575	0.29448	0.14543	0.14051	0.1141		13	0.25425	0.02775
380.5	0.25703	0.4332	0.19218	0.21001	0.42954	0.25087	0.30172	0.30672	0.25682	0.283	0.14315	0.15604	0.10703		13	0.25595	0.02751
381	0.26411	0.4367	0.17173	0.23739	0.40935	0.29302	0.29503	0.30852	0.26351	0.29794	0.17273	0.15765	0.11058		13	0.26294	0.02635
381.5	0.26025	0.40992	0.16157	0.21992	0.42116	0.28711	0.29694	0.30214	0.24556	0.26315	0.16966	0.13811	0.11295		13	0.25296	0.02629
382	0.26463	0.40676	0.15493	0.22383	0.39216	0.28021	0.29275	0.2958	0.24104	0.29424	0.15372	0.15584	0.12137		13	0.2521	0.02484
382.5	0.26776	0.41118	0.16861	0.21854	0.42	0.30042	0.29977	0.30819	0.24564	0.28889	0.15683	0.14081	0.10206		13	0.25605	0.02712
383	0.25611	0.42006	0.15487	0.21814	0.41266	0.29105	0.30119	0.29649	0.24965	0.29351	0.14756	0.14092	0.10129		13	0.25258	0.02753
383.5	0.24017	0.43162	0.1505	0.23166	0.41557	0.28879	0.29363	0.30922	0.23733	0.30166	0.15678	0.15528	0.0993		13	0.25473	0.0278
384	0.25039	0.41859	0.1539	0.22332	0.44695	0.29189	0.3048	0.30219	0.23701	0.29562	0.17262	0.14561	0.11257		13	0.25811	0.02794
384.5	0.24656	0.42424	0.15978	0.23095	0.4052	0.27624	0.32323	0.30612	0.25215	0.29034	0.14021	0.13444	0.12043		13	0.25461	0.02723
385	0.29055	0.40801	0.16486	0.21895	0.42442	0.28586	0.29496	0.29982	0.25046	0.30423	0.15279	0.12937	0.10824		13	0.25635	0.02745
385.5	0.2684	0.41533	0.18156	0.21728	0.40542	0.27741	0.31724	0.3119	0.24084	0.31139	0.13046	0.14084	0.11869		13	0.25667	0.02696
386	0.25769	0.40986	0.1428	0.21856	0.39855	0.30472	0.30413	0.30291	0.23946	0.29876	0.16237	0.13703	0.10381		13	0.25236	0.02693
386.5	0.257	0.42777	0.1453	0.23942	0.40056	0.28002	0.30489	0.30997	0.25369	0.31059	0.15721	0.14081	0.13068		13	0.2583	0.02661
387	0.27871	0.3999	0.15265	0.23306	0.43653	0.27483	0.2978	0.30505	0.24777	0.29572	0.15857	0.1438	0.11684		13	0.25702	0.02687
387.5	0.27001	0.40476	0.1566	0.21633	0.42785	0.28044	0.31497	0.2928	0.21867	0.30549	0.17754	0.14738	0.11231		13	0.25578	0.0267
388	0.28658	0.41034	0.14203	0.22399	0.40648	0.30982	0.29526	0.30934	0.23797	0.29359	0.14739	0.13862	0.12155		13	0.25561	0.02704
388.5	0.2632	0.41505	0.14249	0.21034	0.39629	0.29665	0.30897	0.30412	0.23916	0.28936	0.13597	0.13022	0.09336		13	0.24809	0.0282
389	0.27447	0.42987	0.15782	0.22604	0.43555	0.29569	0.32207	0.30354	0.23726	0.30103	0.14682	0.13715	0.12339		13	0.26082	0.02856
389.5	0.28317	0.42069	0.16585	0.23433	0.42304	0.28064	0.31383	0.30331	0.25297	0.31138	0.16481	0.16064	0.11109		13	0.26352	0.02671
390	0.27216	0.43277	0.15983	0.22037	0.4109	0.2916	0.29215	0.30843	0.25183	0.29551	0.16857	0.15836	0.10868		13	0.25932	0.02675
390.5	0.26817	0.40293	0.15372	0.22584	0.43083	0.32311	0.3104	0.29871	0.24727	0.31711	0.13915	0.14551	0.10415		13	0.25899	0.02837
391	0.279	0.42461	0.1667	0.20851	0.42185	0.2919	0.30959	0.30806	0.23112	0.32226	0.15854	0.11988	0.11956		13	0.25858	0.02832
391.5	0.26707	0.41555	0.135	0.20963	0.41746	0.31746	0.30669	0.30716	0.25808	0.29552	0.16289	0.14501	0.1137		13	0.25779	0.02775
392	0.25652	0.43312	0.16835	0.21549	0.40127	0.30803	0.30077	0.30617	0.24352	0.28664	0.13717	0.15599	0.10272		13	0.25506	0.02747
392.5	0.25523	0.43067	0.15344	0.21841	0.38996	0.31026	0.30429	0.29313	0.24737	0.3096	0.15106	0.15284	0.12962		13	0.25738	0.02626
393	0.26911	0.41459	0.15034	0.20798	0.43869	0.30136	0.31803	0.2942	0.25468	0.29199	0.15563	0.14348	0.11241		13	0.25788	0.02821
393.5	0.27739	0.41302	0.15833	0.21488	0.4052	0.30005	0.32346	0.3053	0.24164	0.28859	0.14383	0.14653	0.10904		13	0.25594	0.02715
394	0.251	0.41176	0.14882	0.22126	0.42159	0.29911	0.31143	0.29427	0.24514	0.30348	0.16161	0.14419	0.10086		13	0.25496	0.02758
394.5	0.27497	0.45038	0.14221	0.21236	0.40411	0.28293	0.31403	0.29999	0.2487	0.29046	0.1537	0.12761	0.10661		13	0.25447	0.02903
395	0.26689	0.42998	0.14883	0.21677	0.43197	0.30245	0.31642	0.30127	0.2417	0.294	0.15922	0.16221	0.11671		13	0.26065	0.02787
395.5	0.23357	0.40434	0.1362	0.21338	0.41197	0.27916	0.29319	0.30028	0.23288	0.28262	0.16653	0.15021	0.11349		13	0.24752	0.02615
396	0.25955	0.43136	0.1407	0.217	0.40431	0.29612	0.30339	0.30073	0.23522	0.28445	0.14457	0.14143	0.11865		13	0.25212	0.02761
396.5	0.26829	0.40556	0.1274	0.21014	0.40001	0.29125	0.30036	0.29959	0.22955	0.27506	0.16532	0.16423	0.12131		13	0.25062	0.02563
397	0.2511	0.41944	0.1611	0.21492	0.38903	0.26033	0.3035	0.30101	0.23378	0.29751	0.14669	0.15554	0.11219		13	0.2497	0.0258
397.5	0.25382	0.41899	0.17334	0.21746	0.3972	0.26828	0.30795	0.29008	0.24856	0.30715	0.1641	0.1408	0.11099		13	0.25375	0.02584
398	0.27274	0.41846	0.15899	0.19993	0.41682	0.25344	0.29399	0.29695	0.23181	0.27683	0.1645	0.14993	0.11895		13	0.25026	0.02622
398.5	0.25779	0.39957	0.14644	0.21521	0.41237	0.27065	0.2918	0.29193	0.23782	0.27953	0.1447	0.1362	0.11909		13	0.24639	0.02615
399	0.26558	0.39916	0.15536	0.2179	0.38271	0.30312	0.2913	0.29479	0.23987	0.28711	0.15261	0.15597	0.10981		13	0.25041	0.02482
399.5	0.28457	0.39624	0.16847	0.21562	0.42042	0.28672	0.30369	0.2912	0.24008	0.30051	0.15062	0.1283	0.12401		13	0.25465	0.02635
400	0.28277	0.41686	0.14552	0.21723	0.40628	0.30806	0.30924	0.29541	0.22832	0.29002	0.14993	0.14786	0.10775		13	0.25425	0.02736
400.5	0.28459	0.41473	0.14467	0.21616	0.39736	0.26215	0.30027	0.29408	0.25206	0.28699	0.16263	0.16638	0.11528		13	0.25364	0.02543
401	0.27565	0.40259	0.14797	0.19689	0.39386	0.29055	0.30225	0.29769	0.24591	0.28536	0.18757	0.15009	0.12222		13	0.25374	0.02478
401.5	0.27623	0.42034	0.16251	0.20815	0.39561	0.2662	0.30006	0.29782	0.23343	0.29248	0.14873	0.14316	0.11076		13	0.25042	0.02637
402	0.26487	0.41401	0.16826	0.21209	0.38915	0.30348	0.30306	0.28497	0.23958	0.26975	0.15269	0.13888	0.11199		13	0.25021	0.02568
402.5	0.26008	0.42204	0.15356	0.20929	0.38953	0.26824	0.31417	0.29836	0.23061	0.29688	0.15454	0.15662	0.10674		13	0.25082	0.02629
403	0.28708	0.40927	0.13829	0.20332	0.39891	0.28919	0.30405	0.28903	0.24638	0.27121	0.15055	0.14405	0.12949		13	0.25083	0.02602
403.5	0.25155	0.41255	0.16084	0.20996	0.37201	0.25991	0.31127	0.2872	0.24565	0.26666	0.16888	0.14524	0.13036		13	0.24785	0.02378
404	0.27801	0.40912	0.16221	0.20949	0.38686	0.30376	0.29012	0.29094	0.2463	0.26512	0.17466	0.16197	0.12726		13	0.25429	0.02387
404.5	0.29144	0.4035	0.14848	0.21742	0.40918	0.27752	0.29767	0.29749	0.23248	0.29792	0.17762	0.16018	0.10391		13	0.25499	0.02584
405	0.24623	0.42042	0.15266	0.21727	0.38175	0.27201	0.30081	0.2962	0.23692	0.28746	0.16411	0.15277	0.1204		13	0.24992	0.02498
405.5	0.2669	0.42533	0.1408	0.20796	0.39933	0.25196	0.30167	0.28669	0.2441	0.28963	0.15284	0.14072	0.11638		13	0.24802	0.02677
406	0.2724	0.42691	0.15136	0.21391	0.39129	0.25995	0.29832	0.29102	0.24996	0.28104	0.1272	0.15058	0.11112		13	0.24808	0.0268
406.5	0.26039	0.40505	0.15884	0.2162	0.40505	0.27281	0.29829	0.29281	0.23701	0.28014	0.17319	0.12676	0.12985		13	0.25049	0.02518
407	0.24484	0.40741	0.15375	0.20319	0.37754	0.27135	0.30001	0.2836	0.2274	0.28808	0.14849	0.13726	0.11018		13	0.24255	0.02537
407.5	0.27738	0.40667	0.15113	0.22126	0.41385	0.29901	0.29368	0.2985	0.23444	0.2883	0.14565	0.1443	0.12592		13	0.25385	0.02636
408	0.26894	0.41283	0.1488	0.21331	0.39031	0.2732	0.30879	0.29531	0.23452	0.28701	0.16806	0.15521	0.11311		13	0.25149	0.02535
408.5	0.25799	0.39153	0.14114	0.20225	0.39184	0.2653	0.31431	0.29943	0.23411	0.27681	0.17225	0.14703	0.11082		13	0.24652	0.02506
409	0.26858	0.40551	0.19002	0.21814	0.38071	0.26496	0.30504	0.28767	0.25866	0.28848	0.15667	0.14911	0.12907		13	0.25405	0.02345
409.5	0.23545	0.4269	0.1544	0.21675	0.41703	0.26959	0.28755	0.29602	0.24056	0.2664	0.16332	0.16436	0.1011		13	0.24919	0.02667
410	0.25473	0.413	0.147	0.20964	0.40367	0.27301	0.29725	0.29427	0.22773	0.26818	0.16627	0.14255	0.10607		13	0.24641	0.0262
410.5	0.27976	0.39174	0.16616	0.20885	0.41311	0.26197	0.27371	0.28965	0.2402	0.27739	0.1508	0.14486	0.13386		13	0.24862	0.02452
411	0.26637	0.40373	0.14085	0.21333	0.42224	0.27518	0.29757	0.29046	0.23893	0.2986	0.1627	0.14849	0.11901		13	0.25211	0.02642
411.5	0.2849	0.40505	0.16123	0.21789	0.37129	0.26515	0.30521	0.28877	0.24042	0.28396	0.16231	0.13499	0.12012		13	0.24933	0.02438
412	0.26446	0.41842	0.14203	0.21241	0.40068	0.28025	0.28866	0.28853	0.23988	0.27995	0.15426	0.1581	0.10716		13	0.24883	0.02622
412.5	0.2538	0.41709	0.17543	0.22504	0.38246	0.28579	0.29005	0.29509	0.23966	0.28532	0.15296	0.16083	0.11109		13	0.25189	0.02462
413	0.26315	0.39957	0.14789	0.21566	0.41123	0.27216	0.28558	0.29135	0.23182	0.28323	0.16144	0.1527	0.11303		13	0.24837	0.02546
413.5	0.26612	0.40875	0.15229	0.21503	0.38498	0.2683	0.30116	0.29462	0.2372	0.29035	0.14821	0.13612	0.12879		13	0.24861	0.02522
414	0.28168	0.41714	0.14537	0.21727	0.40157	0.24914	0.28936	0.28417	0.24872	0.28086	0.16469	0.15021	0.10828		13	0.24911	0.02593
414.5	0.26649	0.42175	0.15677	0.22083	0.39878	0.28297	0.30799	0.29483	0.23288	0.28572	0.1542	0.14605	0.12305		13	0.25325	0.026
415	0.26761	0.42007	0.1724	0.20566	0.38574	0.28534	0.29627	0.29463	0.24063	0.28368	0.16094	0.15803	0.12046		13	0.25319	0.02471
415.5	0.2565	0.41474	0.14799	0.20696	0.39563	0.28213	0.30539	0.29772	0.23158	0.28682	0.16072	0.13597	0.10874		13	0.24853	0.02651
416	0.2321	0.40334	0.16714	0.20814	0.40849	0.27878	0.2945	0.29149	0.23976	0.2871	0.15617	0.15827	0.11634		13	0.24936	0.02515
416.5	0.25684	0.40016	0.18373	0.2014	0.37896	0.26645	0.28979	0.29125	0.24018	0.28577	0.1469	0.15103	0.13187		13	0.24802	0.02338
417	0.23799	0.42495	0.16411	0.21044	0.39513	0.27608	0.30635	0.29901	0.24492	0.28158	0.14993	0.14773	0.13672		13	0.25192	0.02548
417.5	0.26509	0.40116	0.14212	0.20543	0.4188	0.30594	0.29095	0.29761	0.2464	0.29276	0.18251	0.15765	0.12048		13	0.25592	0.02576
418	0.25817	0.41298	0.15976	0.21751	0.40792	0.27976	0.30206	0.2925	0.24546	0.2902	0.15645	0.13579	0.11217		13	0.25159	0.02638
418.5	0.25165	0.41911	0.1555	0.21022	0.38362	0.27139	0.30885	0.29549	0.25262	0.27752	0.14621	0.14835	0.12586		13	0.24972	0.02535
419	0.26425	0.43167	0.17729	0.20995	0.38781	0.29409	0.29781	0.30458	0.24212	0.28144	0.1484	0.1312	0.11942		13	0.25308	0.0264
419.5	0.27018	0.41804	0.16811	0.21529	0.38941	0.29169	0.29133	0.30276	0.25358	0.2923	0.16524	0.15346	0.13068		13	0.25708	0.02456
420	0.25851	0.39855	0.15887	0.21154	0.38939	0.28461	0.31447	0.29083	0.23916	0.28528	0.16375	0.1465	0.11526		13	0.25052	0.02481
420.5	0.27618	0.39962	0.18573	0.22715	0.38253	0.2771	0.31795	0.29808	0.2443	0.2974	0.16017	0.14193	0.13968		13	0.25752	0.02354
421	0.27425	0.42084	0.16665	0.21887	0.41421	0.26841	0.2942	0.2999	0.23635	0.30285	0.14554	0.15394	0.1347		13	0.25621	0.02599
421.5	0.27711	0.40051	0.19711	0.20712	0.40255	0.26826	0.31029	0.30477	0.22621	0.28242	0.14082	0.14416	0.1404		13	0.25398	0.02465
422	0.25692	0.41864	0.18646	0.22577	0.3854	0.28631	0.30865	0.29826	0.24118	0.29159	0.15166	0.15309	0.11263		13	0.25512	0.02506
422.5	0.25802	0.43319	0.17265	0.21164	0.39807	0.28735	0.30809	0.30894	0.24266	0.29728	0.16285	0.1562	0.11106		13	0.25754	0.02637
423	0.2756	0.40175	0.17256	0.21331	0.40582	0.27939	0.30677	0.29627	0.24434	0.27974	0.17256	0.14703	0.11298		13	0.25447	0.02501
423.5	0.29979	0.44272	0.16229	0.20775	0.38325	0.28007	0.31268	0.29764	0.24085	0.27955	0.17511	0.15751	0.1119		13	0.25778	0.02623
424	0.27483	0.42645	0.16644	0.2173	0.39336	0.27398	0.29806	0.29383	0.24297	0.28187	0.158	0.13801	0.11872		13	0.2526	0.02587
424.5	0.26722	0.4234	0.18112	0.20308	0.37847	0.28337	0.29381	0.29803	0.25375	0.28509	0.15366	0.13969	0.12782		13	0.25296	0.02489
425	0.29668	0.39989	0.18313	0.22555	0.3987	0.27879	0.30175	0.30549	0.2403	0.30603	0.16053	0.14602	0.11212		13	0.25808	0.02514
425.5	0.25989	0.42906	0.17292	0.20895	0.40963	0.26653	0.30456	0.29604	0.24408	0.30616	0.17096	0.15047	0.11925		13	0.25681	0.02613
426	0.28808	0.41509	0.17772	0.20818	0.40359	0.26863	0.30695	0.29871	0.25425	0.29162	0.13733	0.13918	0.12411		13	0.25488	0.02625
426.5	0.28443	0.42862	0.1852	0.20877	0.39029	0.29378	0.318	0.30061	0.24305	0.30535	0.1562	0.15171	0.1174		13	0.26026	0.02601
427	0.25807	0.40136	0.16517	0.20738	0.38851	0.26489	0.31437	0.30359	0.24553	0.27517	0.15796	0.14737	0.15365		13	0.25254	0.02365
427.5	0.27275	0.43754	0.16581	0.22566	0.39619	0.27353	0.31816	0.30095	0.2402	0.31507	0.15684	0.16076	0.12465		13	0.26062	0.02628
428	0.26136	0.40731	0.17422	0.21986	0.39474	0.28588	0.30055	0.29837	0.23912	0.30488	0.16101	0.14129	0.12057		13	0.25455	0.02507
428.5	0.27001	0.41511	0.15182	0.21853	0.38815	0.27978	0.3022	0.30546	0.24811	0.29085	0.18733	0.15274	0.14009		13	0.2577	0.02408
429	0.26501	0.42877	0.18397	0.22592	0.41822	0.27434	0.31204	0.30937	0.22962	0.30263	0.14986	0.15197	0.11066		13	0.25865	0.02711
429.5	0.27531	0.43083	0.19439	0.20865	0.40706	0.29943	0.31293	0.29771	0.2544	0.29268	0.16554	0.1636	0.11504		13	0.26289	0.02582
430
430.5
431
431.5
432
432.5
433
433.5
434
434.5
435
435.5
436
436.5
437
437.5
438
438.5
439
439.5
440
440.5
441
441.5
442
442.5
443
443.5
444
444.5
445
445.5
446
446.5
447
447.5
448
448.5
449
449.5
450	0.2509	0.41969	0.19679	0.22338	0.40346	0.31425	0.31498	0.29327	0.25875	0.29334	0.16444	0.16242	0.11553		13	0.2624	0.02521
450.5	0.25504	0.42462	0.16532	0.23046	0.41961	0.33984	0.30927	0.29011	0.26822	0.31491	0.18536	0.17843	0.11056		13	0.2686	0.02641
451	0.236	0.42399	0.20027	0.23911	0.39858	0.31113	0.31075	0.28292	0.2805	0.29922	0.17312	0.15498	0.12426		13	0.26422	0.02469
451.5	0.25078	0.40819	0.17871	0.23651	0.39909	0.33926	0.29852	0.2887	0.27307	0.29152	0.18611	0.15869	0.0994		13	0.2622	0.02529
452	0.24115	0.39507	0.19309	0.23229	0.39448	0.32165	0.31112	0.29188	0.27534	0.29944	0.17107	0.15858	0.117		13	0.2617	0.02399
452.5	0.23515	0.41286	0.16306	0.22771	0.40204	0.29911	0.30719	0.29404	0.27587	0.30886	0.18035	0.14197	0.12159		13	0.25921	0.02552
453	0.24014	0.41605	0.18351	0.22746	0.41915	0.33006	0.30785	0.28537	0.27235	0.29652	0.18663	0.1391	0.11671		13	0.26315	0.02615
453.5	0.27268	0.42134	0.21967	0.24008	0.42898	0.30835	0.3032	0.29534	0.25902	0.29905	0.18713	0.14039	0.11607		13	0.26856	0.02571
454	0.20883	0.3905	0.16832	0.22559	0.4114	0.30347	0.2937	0.28381	0.27252	0.29714	0.16822	0.15222	0.10786		13	0.25258	0.02529
454.5	0.26124	0.41138	0.2094	0.23468	0.41299	0.31655	0.30863	0.28837	0.27036	0.29602	0.17852	0.16188	0.10829		13	0.26602	0.02482
455	0.23549	0.39419	0.188	0.23133	0.43181	0.31941	0.29539	0.29002	0.26011	0.29392	0.17862	0.14672	0.10722		13	0.2594	0.02579
455.5	0.23096	0.42844	0.2057	0.23282	0.40082	0.28453	0.29947	0.28873	0.26434	0.28834	0.17219	0.1674	0.11782		13	0.26012	0.02442
456	0.25851	0.41193	0.16616	0.22566	0.4132	0.32489	0.30147	0.2862	0.25752	0.29825	0.18124	0.14301	0.10955		13	0.25981	0.02621
456.5	0.26409	0.40193	0.19238	0.22618	0.42328	0.31867	0.30378	0.29531	0.25959	0.29557	0.18241	0.15854	0.11815		13	0.26461	0.02488
457	0.23283	0.39714	0.18482	0.23129	0.42136	0.3099	0.30925	0.28417	0.2704	0.29381	0.19928	0.14868	0.11859		13	0.26166	0.02466
457.5	0.28015	0.41029	0.18416	0.23465	0.40095	0.33595	0.31013	0.28569	0.28162	0.297	0.19413	0.16804	0.10265		13	0.26811	0.0249
458	0.25275	0.42731	0.19781	0.24191	0.44382	0.3015	0.31911	0.29066	0.27199	0.32056	0.18645	0.1561	0.1199		13	0.27153	0.02657
458.5	0.24175	0.39634	0.20579	0.22011	0.4401	0.32619	0.29709	0.28486	0.26211	0.29733	0.1866	0.15104	0.10901		13	0.26295	0.02577
459	0.23195	0.43537	0.18041	0.24287	0.43136	0.31874	0.3101	0.29918	0.27347	0.31596	0.17838	0.12907	0.11076		13	0.26597	0.02819
459.5	0.26857	0.39619	0.20543	0.23124	0.39763	0.3134	0.30728	0.29464	0.26623	0.28292	0.16344	0.15552	0.12372		13	0.26202	0.02361
460	0.25739	0.41986	0.16866	0.22824	0.41327	0.30852	0.31491	0.28627	0.27466	0.29238	0.17436	0.14612	0.11885		13	0.26181	0.02606
460.5	0.23897	0.42007	0.19362	0.23588	0.39319	0.32184	0.31344	0.29232	0.28034	0.28847	0.17307	0.15345	0.10415		13	0.26222	0.02543
461	0.2322	0.42469	0.209	0.22325	0.41417	0.3352	0.30826	0.28974	0.2714	0.29069	0.17669	0.15196	0.11156		13	0.26452	0.02606
461.5	0.2472	0.4223	0.18541	0.23379	0.38025	0.31737	0.31298	0.29748	0.27201	0.31657	0.16989	0.15172	0.12067		13	0.26366	0.02495
462	0.23745	0.42223	0.20969	0.23251	0.40762	0.33724	0.29437	0.2871	0.27577	0.30052	0.18903	0.14804	0.11624		13	0.26599	0.02525
462.5	0.23847	0.41365	0.17929	0.23749	0.41913	0.32137	0.31671	0.29867	0.2708	0.30045	0.16444	0.14348	0.10739		13	0.26241	0.02686
463	0.26689	0.41191	0.19097	0.21924	0.4377	0.30915	0.30698	0.29181	0.24882	0.30294	0.19228	0.14545	0.12124		13	0.26503	0.02599
463.5	0.24689	0.42282	0.19016	0.22361	0.39208	0.33355	0.29824	0.29745	0.26739	0.30775	0.17244	0.14551	0.10087		13	0.26144	0.02619
464	0.25237	0.4146	0.19059	0.22714	0.422	0.31266	0.3177	0.29211	0.26519	0.30588	0.19163	0.15903	0.10372		13	0.26574	0.02585
464.5	0.25682	0.4283	0.19398	0.23988	0.41243	0.31654	0.32304	0.30697	0.26954	0.32622	0.1854	0.16069	0.11653		13	0.27203	0.02586
465	0.2339	0.40942	0.18136	0.23824	0.40655	0.34931	0.3103	0.29351	0.27528	0.31279	0.19961	0.15319	0.10057		13	0.26646	0.02603
465.5	0.25665	0.42046	0.19568	0.23419	0.40686	0.32794	0.31044	0.29707	0.26966	0.31626	0.17194	0.15069	0.08429		13	0.26478	0.02706
466	0.24358	0.40949	0.19121	0.24327	0.43992	0.30987	0.32583	0.30523	0.27755	0.31422	0.19178	0.15203	0.10235		13	0.26972	0.0268
466.5	0.25643	0.39898	0.19007	0.23413	0.40235	0.29587	0.31852	0.30554	0.28734	0.31746	0.18559	0.14843	0.11336		13	0.2657	0.02468
467	0.25241	0.4246	0.20246	0.22095	0.42724	0.31253	0.31118	0.2984	0.26605	0.31922	0.17945	0.15581	0.11211		13	0.26788	0.0264
467.5	0.25404	0.41604	0.19057	0.23194	0.40531	0.31914	0.31456	0.30212	0.28383	0.31601	0.18386	0.16351	0.09578		13	0.26744	0.02587
468	0.26347	0.41272	0.16965	0.2361	0.43356	0.33541	0.30402	0.30502	0.27354	0.31616	0.19398	0.14974	0.10664		13	0.26923	0.02705
468.5	0.25682	0.40548	0.18168	0.23899	0.40412	0.33949	0.31499	0.29851	0.27818	0.32089	0.17947	0.16785	0.09769		13	0.26801	0.0258
469	0.25204	0.42267	0.20107	0.23344	0.42248	0.31348	0.31531	0.30336	0.27504	0.32308	0.20101	0.15152	0.10855		13	0.271	0.02603
469.5	0.25249	0.4353	0.18943	0.23123	0.43123	0.30771	0.31593	0.30254	0.28181	0.31941	0.17514	0.15429	0.09224		13	0.26836	0.02805
470	0.23361	0.42962	0.16564	0.23064	0.40418	0.33204	0.32601	0.30678	0.27141	0.31942	0.18012	0.1337	0.12224		13	0.2658	0.0273
470.5	0.23569	0.42812	0.1855	0.22955	0.42828	0.32489	0.33006	0.30378	0.27488	0.33806	0.17581	0.16228	0.12365		13	0.27235	0.02706
471	0.2489	0.41551	0.18889	0.23491	0.42706	0.323	0.32946	0.3071	0.25217	0.34603	0.19487	0.15663	0.11258		13	0.27208	0.02669
471.5	0.25477	0.4248	0.18549	0.23454	0.40219	0.32439	0.32448	0.30611	0.28071	0.29993	0.17676	0.15646	0.1064		13	0.26746	0.02614
472	0.26145	0.41325	0.19783	0.24062	0.43958	0.2954	0.30558	0.30457	0.28146	0.34047	0.18538	0.15333	0.10448		13	0.27103	0.02677
472.5	0.23993	0.42726	0.17468	0.23451	0.43144	0.31451	0.31569	0.3009	0.26498	0.30321	0.17418	0.1398	0.10261		13	0.26336	0.02794
473	0.25052	0.41983	0.19251	0.23365	0.38936	0.32274	0.30647	0.29388	0.27044	0.32857	0.15994	0.16209	0.11481		13	0.26499	0.02532
473.5	0.26121	0.42401	0.17465	0.24978	0.40838	0.32023	0.31203	0.31041	0.27736	0.29623	0.18798	0.15838	0.09741		13	0.26754	0.02631
474	0.22752	0.42486	0.15852	0.23577	0.40247	0.31081	0.32321	0.3027	0.29283	0.32203	0.1903	0.17929	0.10402		13	0.26725	0.02628
474.5	0.24011	0.414	0.1685	0.24174	0.38957	0.33649	0.31191	0.30926	0.26756	0.31631	0.19852	0.14533	0.10196		13	0.26471	0.026
475	0.25893	0.42564	0.17263	0.24143	0.43817	0.31871	0.3011	0.30282	0.26693	0.33499	0.16872	0.13516	0.10547		13	0.26698	0.02853
475.5	0.25436	0.43521	0.18453	0.24355	0.44747	0.32882	0.30713	0.29923	0.28577	0.33638	0.16863	0.15537	0.12593		13	0.2748	0.02788
476	0.2386	0.42686	0.16325	0.23213	0.44004	0.30371	0.32454	0.30412	0.27069	0.32382	0.17935	0.16764	0.10255		13	0.26748	0.02798
476.5	0.27721	0.43876	0.17982	0.23903	0.42386	0.31271	0.32076	0.30507	0.26522	0.32667	0.16134	0.17092	0.09336		13	0.27036	0.02808
477	0.26999	0.42311	0.17435	0.23996	0.41071	0.31375	0.31044	0.29789	0.27168	0.33571	0.17903	0.14231	0.09997		13	0.26684	0.02719
477.5	0.2494	0.42353	0.18636	0.23024	0.41902	0.32756	0.32199	0.30037	0.26251	0.3307	0.18517	0.14571	0.10246		13	0.26808	0.02728
478	0.23724	0.4459	0.15772	0.2378	0.41563	0.31496	0.30558	0.30836	0.27068	0.32106	0.19209	0.15419	0.11924		13	0.26773	0.02731
478.5	0.25824	0.41381	0.16792	0.23879	0.42988	0.31629	0.31761	0.30567	0.28166	0.33525	0.19	0.15001	0.11947		13	0.27112	0.02671
479	0.25712	0.41142	0.17818	0.22697	0.4216	0.29649	0.32346	0.30845	0.28895	0.31932	0.17988	0.1456	0.1149		13	0.2671	0.02641
479.5	0.24851	0.41736	0.15448	0.23209	0.38117	0.29075	0.30766	0.30474	0.27106	0.32716	0.1815	0.13799	0.11361		13	0.25908	0.0258
480	0.23946	0.42754	0.16938	0.22484	0.4122	0.31897	0.30978	0.30821	0.26201	0.32838	0.16974	0.12518	0.11518		13	0.26237	0.02788
480.5	0.24029	0.42019	0.1577	0.22505	0.40671	0.29915	0.32979	0.30489	0.2697	0.31801	0.19888	0.14969	0.11324		13	0.2641	0.02636
481	0.2507	0.42107	0.15389	0.23795	0.41731	0.32012	0.32098	0.30672	0.28341	0.33133	0.17661	0.14863	0.1163		13	0.26808	0.02737
481.5	0.22939	0.42145	0.15307	0.23832	0.4235	0.31204	0.3322	0.30411	0.26574	0.32306	0.16277	0.15398	0.12225		13	0.26476	0.02761
482	0.23648	0.42965	0.18558	0.23213	0.42125	0.33146	0.34273	0.30064	0.26621	0.3248	0.19133	0.1446	0.1088		13	0.27044	0.02762
482.5	0.23955	0.42056	0.16986	0.2262	0.42108	0.28016	0.31905	0.3021	0.26321	0.31157	0.16844	0.15125	0.11206		13	0.26039	0.02678
483	0.2261	0.39985	0.15923	0.23822	0.41409	0.30385	0.33694	0.30337	0.28209	0.32553	0.19054	0.15334	0.12478		13	0.26599	0.02577
483.5	0.25636	0.43324	0.15505	0.23243	0.39638	0.30217	0.3314	0.30042	0.27398	0.32547	0.1782	0.16897	0.11203		13	0.26662	0.02652
484	0.22511	0.4248	0.16282	0.22601	0.39367	0.30532	0.31886	0.30061	0.27554	0.31735	0.17907	0.14611	0.11039		13	0.26043	0.02649
484.5	0.23908	0.41988	0.14794	0.22365	0.40098	0.30599	0.32533	0.30308	0.27158	0.31584	0.18905	0.17324	0.12384		13	0.26458	0.02558
485	0.24742	0.40394	0.16495	0.21711	0.41545	0.32285	0.3311	0.30322	0.28159	0.31731	0.18152	0.13729	0.1068		13	0.26389	0.02715
485.5	0.24571	0.41037	0.15998	0.2323	0.41301	0.30223	0.32152	0.29714	0.27838	0.31251	0.19016	0.16332	0.11939		13	0.26508	0.02541
486	0.23989	0.42229	0.13073	0.21724	0.39217	0.30218	0.31726	0.29639	0.27354	0.29499	0.17292	0.15826	0.11185		13	0.25613	0.02658
486.5	0.22669	0.40984	0.16849	0.22609	0.4046	0.32358	0.31425	0.30342	0.27564	0.28975	0.17532	0.13051	0.11916		13	0.25903	0.02628
487	0.23426	0.40994	0.17396	0.23052	0.38335	0.30538	0.31752	0.3028	0.26639	0.29918	0.16773	0.13879	0.09631		13	0.25586	0.02597
487.5	0.26209	0.41709	0.16016	0.22529	0.39678	0.2994	0.33619	0.30097	0.26768	0.30259	0.17497	0.16903	0.12007		13	0.26402	0.02536
488	0.22867	0.43	0.16555	0.22965	0.42425	0.3347	0.32464	0.3041	0.26225	0.30391	0.17585	0.1382	0.11579		13	0.26443	0.02806
488.5	0.24688	0.41337	0.15674	0.23957	0.40999	0.31283	0.32545	0.29895	0.2599	0.3149	0.17761	0.1539	0.10896		13	0.263	0.02651
489	0.25835	0.41416	0.17542	0.23452	0.40964	0.28917	0.31962	0.29258	0.27604	0.31028	0.18803	0.15525	0.09611		13	0.26301	0.02596
489.5	0.20849	0.41106	0.16042	0.22639	0.39946	0.29258	0.33522	0.29895	0.26431	0.31242	0.17959	0.15943	0.10339		13	0.25782	0.02631
490	0.2277	0.41679	0.16863	0.2188	0.40346	0.31553	0.32468	0.28855	0.28069	0.30436	0.1991	0.15185	0.11575		13	0.26276	0.02568
490.5	0.23527	0.4086	0.16311	0.22936	0.40152	0.29246	0.33648	0.29356	0.24743	0.30553	0.18295	0.15473	0.09242		13	0.25718	0.02635
491	0.21802	0.39927	0.17624	0.21568	0.38856	0.30247	0.32082	0.29345	0.25835	0.29459	0.16474	0.15474	0.12675		13	0.2549	0.02429
491.5	0.20819	0.42328	0.18303	0.22536	0.42141	0.31511	0.34052	0.29636	0.25886	0.30367	0.18873	0.15447	0.0935		13	0.2625	0.02763
492	0.23912	0.41768	0.17262	0.22211	0.41556	0.31154	0.33058	0.29901	0.26629	0.29926	0.16866	0.15357	0.09695		13	0.261	0.02722
492.5	0.24167	0.41132	0.16108	0.22645	0.39949	0.28341	0.33451	0.30077	0.25683	0.30235	0.19846	0.15523	0.10253		13	0.25955	0.02566
493	0.22653	0.40442	0.15193	0.22895	0.41503	0.32229	0.3313	0.29215	0.27121	0.29823	0.17483	0.14143	0.10503		13	0.25872	0.02722
493.5	0.24227	0.40987	0.15803	0.2299	0.42716	0.34046	0.34555	0.29955	0.26987	0.29898	0.19924	0.16736	0.09187		13	0.2677	0.02759
494	0.23841	0.41229	0.16681	0.2272	0.39378	0.29922	0.32879	0.29315	0.27133	0.29416	0.18003	0.15434	0.1205		13	0.26	0.02494
494.5	0.22273	0.41411	0.1522	0.22411	0.41349	0.30679	0.32635	0.29353	0.27307	0.29676	0.17608	0.16512	0.09673		13	0.25854	0.02698
495	0.23574	0.41373	0.17231	0.21669	0.41542	0.30874	0.31342	0.29938	0.24922	0.29337	0.1655	0.14936	0.11602		13	0.25761	0.02628
495.5	0.22161	0.38921	0.18371	0.22492	0.39155	0.31983	0.31799	0.29502	0.26888	0.29046	0.20094	0.1563	0.10802		13	0.25911	0.02389
496	0.216	0.41974	0.16184	0.22675	0.38693	0.3202	0.31305	0.29717	0.26254	0.31786	0.18821	0.15149	0.14279		13	0.26189	0.02482
496.5	0.24513	0.41002	0.17307	0.23338	0.40067	0.30999	0.33407	0.29905	0.25872	0.30735	0.18281	0.16426	0.12252		13	0.26469	0.02484
497	0.23111	0.4372	0.18539	0.23062	0.40194	0.3053	0.31835	0.2907	0.25797	0.29142	0.18287	0.1602	0.10881		13	0.26168	0.02594
497.5	0.23881	0.40538	0.16355	0.21538	0.39862	0.29549	0.32145	0.28651	0.25627	0.30508	0.18221	0.16471	0.10568		13	0.25686	0.02515
498	0.23299	0.4102	0.17513	0.23951	0.40839	0.31268	0.34106	0.29707	0.28177	0.29676	0.17509	0.16499	0.10385		13	0.26457	0.02605
498.5	0.22753	0.38845	0.16263	0.22874	0.40623	0.32158	0.32959	0.29896	0.26266	0.30084	0.185	0.15115	0.11862		13	0.26015	0.02515
499	0.22209	0.40842	0.19252	0.23877	0.41101	0.31334	0.33268	0.29828	0.25785	0.31442	0.18931	0.16268	0.10246		13	0.26491	0.02567
499.5	0.24575	0.41097	0.15536	0.23091	0.41483	0.31122	0.34756	0.29042	0.27557	0.29701	0.16882	0.14861	0.11457		13	0.26243	0.02696
500	0.21271	0.39483	0.16426	0.22826	0.40988	0.30385	0.3299	0.29876	0.26927	0.29876	0.16794	0.17672	0.10274		13	0.2583	0.0257
500.5	0.24317	0.42636	0.16113	0.23129	0.36709	0.30041	0.32588	0.29918	0.2651	0.29356	0.18917	0.16665	0.1164		13	0.26042	0.02442
501	0.23775	0.41462	0.1517	0.23108	0.40972	0.28531	0.3441	0.29402	0.2682	0.31057	0.17614	0.15155	0.12398		13	0.26144	0.02633
501.5	0.23855	0.41439	0.1771	0.21605	0.42327	0.33006	0.31865	0.29831	0.25627	0.3022	0.18791	0.14325	0.1063		13	0.26249	0.027
502	0.25934	0.42518	0.16614	0.22288	0.41912	0.34303	0.31599	0.28776	0.25906	0.31647	0.18211	0.16584	0.10773		13	0.26697	0.02706
502.5	0.25259	0.40627	0.15602	0.22792	0.43654	0.28629	0.32975	0.29743	0.24163	0.325	0.17545	0.14793	0.109		13	0.26091	0.02756
503	0.26544	0.42502	0.17417	0.22858	0.40696	0.30103	0.33406	0.29942	0.26413	0.31323	0.20783	0.15351	0.13514		13	0.26988	0.02496
503.5	0.22535	0.43722	0.16988	0.23301	0.36394	0.29807	0.33529	0.30018	0.27968	0.30381	0.18399	0.15728	0.10909		13	0.26129	0.02562
504	0.25857	0.40267	0.13739	0.22245	0.42661	0.3316	0.33505	0.29306	0.259	0.29111	0.19364	0.15267	0.10796		13	0.26244	0.02731
504.5	0.24517	0.40196	0.15941	0.23261	0.39971	0.29399	0.33285	0.29743	0.26421	0.30575	0.17123	0.15941	0.11251		13	0.25971	0.02538
505	0.27813	0.42494	0.1621	0.22907	0.40405	0.32025	0.33168	0.29887	0.27195	0.31219	0.19942	0.15423	0.12567		13	0.2702	0.02576
505.5	0.21537	0.41766	0.16479	0.23342	0.43235	0.27201	0.33589	0.30614	0.27018	0.30623	0.17416	0.15853	0.10462		13	0.26087	0.02755
506	0.24363	0.41491	0.17205	0.23419	0.41719	0.29927	0.34616	0.30487	0.2611	0.31017	0.18452	0.15485	0.11096		13	0.26568	0.02648
506.5	0.24371	0.41368	0.185	0.23084	0.40672	0.31242	0.33635	0.2958	0.2578	0.3024	0.17256	0.1439	0.11921		13	0.26311	0.02587
507	0.23657	0.4153	0.17191	0.21774	0.39478	0.30651	0.34419	0.2929	0.26676	0.31741	0.18062	0.16039	0.12056		13	0.26351	0.02552
507.5	0.22932	0.41348	0.16144	0.22996	0.4311	0.30997	0.32689	0.29518	0.26638	0.32073	0.17722	0.13757	0.12306		13	0.26325	0.02736
508	0.24882	0.40776	0.15568	0.24026	0.3948	0.3101	0.32431	0.29731	0.27315	0.32114	0.19408	0.15559	0.09192		13	0.26269	0.02616
508.5	0.25128	0.41223	0.15312	0.23935	0.40947	0.28836	0.35465	0.29647	0.26258	0.31211	0.18279	0.14799	0.1094		13	0.26306	0.02683
509	0.24138	0.41856	0.16995	0.24752	0.42474	0.31557	0.34443	0.29508	0.26726	0.30873	0.17992	0.1538	0.11718		13	0.26801	0.0268
509.5	0.25558	0.43578	0.17935	0.23135	0.40867	0.29249	0.34015	0.30147	0.27271	0.33431	0.17647	0.17193	0.12289		13	0.27101	0.02621
510	0.27268	0.41473	0.15742	0.23017	0.40883	0.30693	0.33862	0.30063	0.26735	0.30897	0.16363	0.16198	0.10688		13	0.26453	0.02682
510.5	0.23047	0.41244	0.17945	0.25242	0.40533	0.30607	0.33266	0.29794	0.27271	0.31535	0.19662	0.14877	0.11498		13	0.26656	0.02541
511	0.23322	0.39922	0.16257	0.22783	0.40281	0.32512	0.33929	0.29933	0.25954	0.31264	0.16891	0.15847	0.11032		13	0.26148	0.02617
511.5	0.27749	0.42443	0.16996	0.22791	0.38245	0.29869	0.33085	0.29557	0.25123	0.28064	0.17075	0.16225	0.11575		13	0.26061	0.02507
512	0.24015	0.41742	0.16533	0.22802	0.41247	0.31599	0.35166	0.30377	0.2793	0.31572	0.19319	0.13773	0.12809		13	0.26837	0.0267
512.5	0.22752	0.4264	0.15129	0.23493	0.41252	0.33647	0.33349	0.30024	0.2602	0.31742	0.19145	0.173	0.09193		13	0.26591	0.02781
513	0.20246	0.40545	0.18753	0.22317	0.41871	0.29837	0.3297	0.29993	0.26746	0.30961	0.18224	0.162	0.11687		13	0.26181	0.02567
513.5	0.22737	0.41909	0.1449	0.22726	0.42883	0.31308	0.33878	0.30172	0.26613	0.30817	0.19117	0.15875	0.12881		13	0.2657	0.02704
514	0.25334	0.43714	0.16733	0.22343	0.42355	0.28079	0.33409	0.30011	0.26834	0.32394	0.18293	0.16278	0.11665		13	0.26726	0.02716
514.5	0.25487	0.40409	0.18988	0.23228	0.44024	0.29486	0.34647	0.29835	0.27975	0.30502	0.19419	0.15863	0.10574		13	0.26957	0.0264
515	0.25532	0.4121	0.16987	0.23173	0.41879	0.33693	0.36524	0.2932	0.26407	0.31153	0.15812	0.16176	0.11528		13	0.26876	0.02751
515.5	0.26212	0.41653	0.18685	0.23288	0.40717	0.31268	0.35793	0.29689	0.26835	0.31426	0.17073	0.13595	0.11801		13	0.26772	0.02676
516	0.25873	0.41098	0.18782	0.22227	0.42782	0.31518	0.33872	0.29726	0.2784	0.30404	0.1911	0.17995	0.10418		13	0.2705	0.02588
516.5	0.27745	0.40534	0.18389	0.22579	0.41426	0.31323	0.34221	0.30073	0.27205	0.34059	0.17801	0.15028	0.12897		13	0.27175	0.02585
517	0.28732	0.4069	0.18404	0.2327	0.40958	0.3011	0.34233	0.3008	0.27788	0.31651	0.1669	0.14276	0.11197		13	0.26775	0.02636
517.5	0.27053	0.41168	0.1737	0.21879	0.43057	0.3033	0.31858	0.29755	0.26273	0.30386	0.18204	0.1474	0.10348		13	0.2634	0.02693
518	0.22762	0.4087	0.17128	0.24176	0.42126	0.29661	0.34198	0.30433	0.27621	0.30811	0.18041	0.16309	0.10493		13	0.2651	0.02648
518.5	0.24395	0.40405	0.19309	0.23827	0.42442	0.29925	0.34422	0.30845	0.26297	0.32675	0.16479	0.15199	0.11853		13	0.26775	0.02636
519	0.23008	0.42365	0.16827	0.2284	0.40368	0.31625	0.34618	0.3102	0.27567	0.32033	0.17899	0.14631	0.11535		13	0.26641	0.0271
519.5	0.27638	0.42699	0.16185	0.23548	0.38938	0.31052	0.34791	0.30127	0.25726	0.32138	0.17422	0.15193	0.12023		13	0.26729	0.02641
520
520.5
521
521.5
522
522.5
523
523.5
524
524.5
525
525.5
526
526.5
527
527.5
528
528.5
529
529.5
530
530.5
531
531.5
532
532.5
533
533.5
534
534.5
535
535.5
536
536.5
537
537.5
538
538.5
539
539.5
540	0.26547	0.42655	0.18133	0.23594	0.39061	0.31049	0.35462	0.30084	0.25846	0.32232	0.17852	0.15285	0.11946		13	0.26904	0.026
540.5	0.26359	0.4222	0.18372	0.23735	0.43684	0.2967	0.37708	0.29416	0.25168	0.3261	0.19736	0.17873	0.11993		13	0.2758	0.02673
541	0.24121	0.4274	0.19345	0.24309	0.43019	0.28274	0.38567	0.29444	0.24914	0.33877	0.17805	0.17016	0.10832		13	0.27251	0.02792
541.5	0.2291	0.44994	0.1723	0.23062	0.41513	0.30534	0.37767	0.2996	0.25031	0.32907	0.16951	0.14496	0.12586		13	0.26919	0.0289
542	0.24828	0.42814	0.1921	0.24229	0.40048	0.32046	0.37539	0.30005	0.24825	0.31516	0.20794	0.1715	0.11682		13	0.27437	0.02572
542.5	0.26094	0.4165	0.20614	0.25057	0.4329	0.3327	0.36431	0.29276	0.2432	0.32423	0.20996	0.17722	0.10866		13	0.27847	0.02617
543	0.2232	0.43154	0.19592	0.24454	0.4215	0.30347	0.37761	0.29588	0.2538	0.32305	0.19733	0.15209	0.12311		13	0.27254	0.02709
543.5	0.22793	0.45682	0.17625	0.23294	0.41108	0.3203	0.3489	0.30148	0.24312	0.32899	0.19614	0.15033	0.12268		13	0.27054	0.02798
544	0.2452	0.43514	0.19233	0.24243	0.40421	0.33002	0.3747	0.29891	0.24288	0.32445	0.16725	0.16264	0.12264		13	0.27252	0.02721
544.5	0.23158	0.43236	0.18716	0.23938	0.39246	0.28326	0.36636	0.29878	0.24171	0.32116	0.18382	0.15436	0.10019		13	0.26404	0.02698
545	0.2546	0.42259	0.1815	0.23604	0.39637	0.31616	0.3648	0.29928	0.25924	0.3215	0.19086	0.14346	0.1253		13	0.27013	0.02612
545.5	0.2346	0.44112	0.16934	0.22887	0.4193	0.32647	0.37215	0.29666	0.23814	0.29977	0.17941	0.15214	0.11065		13	0.26682	0.02867
546	0.25173	0.44244	0.17816	0.23407	0.40961	0.32067	0.35712	0.2963	0.23631	0.31306	0.20058	0.15761	0.12062		13	0.27064	0.0269
546.5	0.25715	0.44928	0.17724	0.23353	0.42795	0.31844	0.36843	0.29374	0.2554	0.32046	0.18186	0.14761	0.10917		13	0.27233	0.02899
547	0.25248	0.43285	0.14857	0.21662	0.41463	0.31748	0.35779	0.29995	0.25367	0.31874	0.17155	0.15765	0.12838		13	0.26695	0.02786
547.5	0.25697	0.42494	0.20543	0.25015	0.40319	0.31204	0.39566	0.30119	0.24661	0.33003	0.20762	0.15382	0.11939		13	0.27746	0.02637
548	0.21897	0.43687	0.19547	0.24428	0.41436	0.31447	0.34979	0.29712	0.24712	0.31636	0.19872	0.14771	0.09916		13	0.26772	0.02755
548.5	0.27217	0.44613	0.17671	0.23322	0.43078	0.29921	0.35859	0.29135	0.24084	0.31823	0.18049	0.16558	0.12468		13	0.27215	0.02765
549	0.27671	0.44316	0.1943	0.24359	0.38683	0.30028	0.3591	0.29883	0.2474	0.31776	0.16629	0.15121	0.11499		13	0.26927	0.02673
549.5	0.25758	0.41702	0.18135	0.23596	0.40352	0.33474	0.36847	0.2888	0.23196	0.32032	0.17653	0.16176	0.11936		13	0.26903	0.02655
550	0.26167	0.41909	0.18882	0.24036	0.40651	0.31981	0.35402	0.29806	0.25543	0.3208	0.17664	0.14932	0.13947		13	0.27154	0.02555
550.5	0.24722	0.43738	0.18223	0.23647	0.374	0.31708	0.35795	0.29307	0.24705	0.32535	0.16965	0.14863	0.10464		13	0.26467	0.02704
551	0.25897	0.44774	0.19956	0.24669	0.40711	0.31007	0.3691	0.29798	0.22781	0.32593	0.16779	0.15439	0.14562		13	0.27375	0.02682
551.5	0.23393	0.43247	0.16811	0.22815	0.39369	0.29769	0.37687	0.28717	0.23296	0.31843	0.16593	0.14668	0.12518		13	0.2621	0.02745
552	0.27325	0.43225	0.19859	0.24612	0.40766	0.30574	0.36026	0.29784	0.24112	0.31248	0.18087	0.16051	0.11453		13	0.27163	0.02629
552.5	0.29052	0.41603	0.16128	0.22412	0.40569	0.29668	0.37483	0.29813	0.23371	0.30772	0.17071	0.13994	0.11824		13	0.26443	0.02759
553	0.24713	0.43729	0.17641	0.23304	0.38602	0.30403	0.356	0.29369	0.24418	0.30835	0.18662	0.14031	0.12608		13	0.26455	0.02624
553.5	0.25647	0.41602	0.17018	0.22937	0.41815	0.29626	0.3657	0.29609	0.25688	0.32801	0.18745	0.15417	0.12172		13	0.26896	0.02672
554	0.25363	0.41972	0.17825	0.23412	0.41099	0.28253	0.35616	0.2894	0.247	0.31119	0.16832	0.16211	0.12506		13	0.2645	0.02595
554.5	0.24975	0.4397	0.18459	0.23786	0.42885	0.32681	0.34939	0.28904	0.23138	0.30624	0.17223	0.14727	0.12582		13	0.26838	0.02783
555	0.25402	0.4521	0.17874	0.23441	0.39694	0.30085	0.37379	0.2974	0.25143	0.31164	0.20807	0.17088	0.14795		13	0.27525	0.02555
555.5	0.27283	0.42951	0.18498	0.23809	0.3868	0.30619	0.35954	0.29532	0.24259	0.3002	0.16335	0.16638	0.09832		13	0.26493	0.02658
556	0.25298	0.44165	0.17995	0.23513	0.4305	0.30715	0.3592	0.29897	0.24412	0.32882	0.20006	0.14768	0.12626		13	0.27327	0.02768
556.5	0.30407	0.44048	0.17722	0.23352	0.40065	0.31703	0.36543	0.29875	0.23623	0.33153	0.15823	0.15272	0.135		13	0.27314	0.02758
557	0.28347	0.46016	0.18292	0.23688	0.42355	0.31286	0.35974	0.29861	0.24066	0.33173	0.19838	0.1559	0.12705		13	0.27784	0.02794
557.5	0.25937	0.4333	0.20027	0.24711	0.39634	0.27364	0.35787	0.2994	0.23393	0.31979	0.17952	0.16257	0.12223		13	0.2681	0.02557
558	0.24075	0.43984	0.18871	0.24029	0.41461	0.30296	0.37001	0.29211	0.25628	0.32278	0.19936	0.15076	0.12833		13	0.27283	0.02677
558.5	0.27736	0.43319	0.19828	0.24594	0.42727	0.29251	0.36106	0.30095	0.26034	0.31769	0.1801	0.1585	0.12523		13	0.27526	0.0266
559	0.22945	0.43558	0.18128	0.23591	0.40215	0.31302	0.36066	0.29316	0.24727	0.31189	0.17032	0.15606	0.11688		13	0.26566	0.0271
559.5	0.24995	0.44683	0.18568	0.23851	0.39635	0.30117	0.35924	0.29487	0.23991	0.29692	0.16462	0.14038	0.12125		13	0.26428	0.02733
560	0.26337	0.42967	0.19636	0.24481	0.3881	0.31984	0.35223	0.29617	0.23251	0.33146	0.18567	0.16141	0.12705		13	0.27143	0.02531
560.5	0.26229	0.43933	0.19812	0.24584	0.43471	0.31845	0.36843	0.29973	0.23616	0.328	0.16677	0.14435	0.14671		13	0.27607	0.02776
561	0.26524	0.45083	0.18736	0.2395	0.40638	0.29508	0.36546	0.29234	0.23958	0.35116	0.17397	0.15412	0.11419		13	0.27194	0.02816
561.5	0.24474	0.42159	0.1905	0.24135	0.42511	0.29549	0.35798	0.29423	0.24409	0.328	0.19755	0.14071	0.13652		13	0.2706	0.02626
562	0.23347	0.43603	0.18927	0.24063	0.40476	0.29095	0.36723	0.29831	0.2556	0.29832	0.18174	0.13771	0.13208		13	0.26662	0.02659
562.5	0.25134	0.43238	0.17629	0.23297	0.43988	0.30034	0.36604	0.30172	0.25326	0.3207	0.18342	0.16113	0.12506		13	0.27266	0.02773
563	0.23237	0.42439	0.1888	0.24035	0.40933	0.30243	0.38565	0.30003	0.25603	0.32902	0.16847	0.15266	0.10506		13	0.26881	0.02801
563.5	0.28405	0.45351	0.17545	0.23247	0.43098	0.31086	0.35676	0.29815	0.25083	0.31757	0.18179	0.18059	0.11683		13	0.27614	0.02791
564	0.22745	0.41964	0.18506	0.23814	0.4252	0.30806	0.37866	0.3004	0.24473	0.32505	0.17086	0.1388	0.1338		13	0.26891	0.02773
564.5	0.24294	0.43552	0.19476	0.24386	0.41204	0.29264	0.37395	0.29138	0.24891	0.32149	0.18218	0.14896	0.13396		13	0.27097	0.0266
565	0.2648	0.41891	0.21989	0.25868	0.40671	0.30912	0.37559	0.29536	0.24387	0.31743	0.17597	0.16382	0.1024		13	0.27327	0.02629
565.5	0.23642	0.44012	0.19801	0.24578	0.39231	0.32013	0.35961	0.29887	0.24492	0.3308	0.17798	0.15978	0.11802		13	0.27098	0.02658
566	0.28543	0.42059	0.18176	0.23619	0.42383	0.28296	0.37258	0.30465	0.24228	0.32339	0.19725	0.17067	0.13332		13	0.27499	0.02589
566.5	0.2696	0.42727	0.20082	0.24743	0.42884	0.30437	0.35786	0.2954	0.24909	0.3126	0.16899	0.14594	0.1236		13	0.27168	0.02704
567	0.26121	0.46025	0.18473	0.23794	0.42406	0.29715	0.36124	0.3008	0.24704	0.31099	0.20075	0.16968	0.13035		13	0.27586	0.02708
567.5	0.2493	0.46476	0.19323	0.24296	0.40786	0.30038	0.3658	0.2914	0.23408	0.33381	0.16976	0.15107	0.14086		13	0.27271	0.02781
568	0.28877	0.44389	0.198	0.24577	0.39408	0.29979	0.37278	0.30124	0.23439	0.31763	0.17945	0.15175	0.10968		13	0.27209	0.02722
568.5	0.27661	0.44568	0.19485	0.24392	0.41637	0.28996	0.34976	0.29857	0.25452	0.33384	0.18371	0.14707	0.12586		13	0.2739	0.027
569	0.23197	0.43714	0.17303	0.23105	0.41962	0.2957	0.3695	0.2927	0.23844	0.31333	0.17601	0.15411	0.13834		13	0.267	0.02728
569.5	0.25914	0.44449	0.16971	0.22909	0.41549	0.27255	0.36492	0.29751	0.25242	0.31062	0.15961	0.15117	0.13143		13	0.26601	0.02779
570	0.24324	0.45175	0.18778	0.23975	0.44131	0.29131	0.35645	0.30236	0.24356	0.33048	0.1727	0.14934	0.11474		13	0.27114	0.02911
570.5	0.26699	0.42173	0.17759	0.23374	0.41483	0.29013	0.37851	0.30145	0.24054	0.33001	0.17739	0.14923	0.11544		13	0.26905	0.02757
571	0.2456	0.43188	0.20451	0.24961	0.42237	0.30904	0.36363	0.30089	0.23641	0.31972	0.16991	0.1673	0.1142		13	0.27193	0.02708
571.5	0.26075	0.42185	0.18958	0.24081	0.414	0.30459	0.35982	0.2939	0.25048	0.31314	0.17977	0.15174	0.1334		13	0.2703	0.02583
572	0.25025	0.4419	0.18689	0.23922	0.41822	0.29794	0.35172	0.2829	0.2485	0.32497	0.15252	0.15522	0.12264		13	0.26715	0.02767
572.5	0.25933	0.43127	0.18316	0.23702	0.41457	0.29129	0.37874	0.30126	0.26999	0.31119	0.18355	0.14857	0.13173		13	0.27244	0.02678
573	0.23214	0.42486	0.18029	0.23533	0.41961	0.29701	0.36303	0.29495	0.23932	0.31048	0.17656	0.16302	0.12263		13	0.2661	0.02671
573.5	0.24889	0.45329	0.20814	0.25175	0.40454	0.31064	0.35074	0.29748	0.26827	0.34193	0.19526	0.15586	0.12482		13	0.27782	0.02647
574	0.26545	0.44652	0.16545	0.22658	0.42582	0.32515	0.35592	0.30637	0.2591	0.31941	0.16254	0.14985	0.12504		13	0.27179	0.02882
574.5	0.25443	0.46428	0.17008	0.22931	0.39613	0.29744	0.36266	0.30247	0.24592	0.3139	0.18682	0.17875	0.12808		13	0.27156	0.02701
575	0.26369	0.4028	0.16207	0.22459	0.42179	0.2784	0.36386	0.299	0.25801	0.31931	0.17492	0.1336	0.12721		13	0.26379	0.02706
575.5	0.26592	0.4285	0.17801	0.23398	0.42364	0.30903	0.3599	0.3022	0.24384	0.33001	0.21425	0.17357	0.12128		13	0.2757	0.02625
576	0.2605	0.44974	0.16616	0.227	0.40673	0.29058	0.3624	0.29633	0.24375	0.30661	0.17937	0.16061	0.12173		13	0.26704	0.02744
576.5	0.28115	0.41906	0.19089	0.24158	0.43252	0.30806	0.35862	0.29749	0.23378	0.30646	0.17726	0.17517	0.10973		13	0.27168	0.02677
577	0.2667	0.44624	0.16695	0.22746	0.42383	0.27991	0.34222	0.29496	0.2492	0.29713	0.16581	0.14768	0.11437		13	0.26327	0.02816
577.5	0.27276	0.42807	0.17991	0.2351	0.42685	0.28895	0.36966	0.29852	0.2334	0.32658	0.17631	0.14638	0.11174		13	0.26879	0.02815
578	0.2631	0.43351	0.17941	0.23481	0.43277	0.28553	0.35851	0.29331	0.24044	0.30335	0.18477	0.13911	0.13161		13	0.26771	0.02736
578.5	0.26761	0.42438	0.20647	0.25077	0.4099	0.29898	0.35589	0.3028	0.26002	0.33543	0.18232	0.1563	0.1288		13	0.27536	0.02553
579	0.25383	0.43812	0.18133	0.23594	0.41003	0.29804	0.35764	0.29042	0.25136	0.32014	0.17891	0.15565	0.10553		13	0.26746	0.02741
579.5	0.30444	0.43155	0.18731	0.23947	0.43602	0.31885	0.35328	0.29936	0.2457	0.32146	0.17284	0.15829	0.11662		13	0.27578	0.02786
580	0.26551	0.45235	0.18952	0.24077	0.43748	0.306	0.36457	0.30322	0.26021	0.30821	0.15531	0.1593	0.1364		13	0.2753	0.02824
580.5	0.26515	0.42295	0.17556	0.23254	0.41762	0.27883	0.36094	0.29822	0.24599	0.33722	0.18527	0.15515	0.14123		13	0.27051	0.02615
581	0.25496	0.472	0.17929	0.23474	0.45883	0.30563	0.36064	0.29968	0.25037	0.33751	0.18537	0.16462	0.12017		13	0.27876	0.03008
581.5	0.25912	0.45197	0.19034	0.24125	0.42829	0.28323	0.37508	0.28963	0.23205	0.314	0.18021	0.1589	0.13467		13	0.27221	0.02763
582	0.25773	0.40633	0.16464	0.2261	0.43399	0.29814	0.36219	0.30035	0.25316	0.31764	0.18292	0.17432	0.11672		13	0.26879	0.02675
582.5	0.28607	0.44133	0.16505	0.22634	0.43788	0.29673	0.3867	0.29409	0.25912	0.31663	0.19831	0.15765	0.13303		13	0.27684	0.02817
583	0.28939	0.45026	0.16993	0.22922	0.4383	0.29185	0.37139	0.29993	0.24969	0.32296	0.18853	0.16116	0.1496		13	0.27786	0.02773
583.5	0.28073	0.44831	0.21286	0.25453	0.41754	0.30696	0.37227	0.30424	0.25362	0.32184	0.18916	0.15395	0.13271		13	0.28067	0.02662
584	0.24933	0.43163	0.15949	0.22306	0.41299	0.31884	0.36845	0.30454	0.24392	0.32225	0.17934	0.15809	0.14124		13	0.27024	0.0272
584.5	0.26213	0.44686	0.17542	0.23245	0.43071	0.28547	0.37243	0.29717	0.24445	0.33096	0.18828	0.154	0.13264		13	0.2733	0.02799
585	0.29191	0.45327	0.1601	0.22342	0.43276	0.30598	0.36682	0.30017	0.26712	0.31719	0.17661	0.15805	0.13935		13	0.27637	0.02847
585.5	0.29548	0.42987	0.17921	0.23469	0.40979	0.31334	0.35907	0.29584	0.24958	0.31159	0.18883	0.1456	0.13836		13	0.27317	0.02621
586	0.28108	0.43358	0.17469	0.23202	0.41507	0.31061	0.37628	0.30011	0.25748	0.32448	0.19247	0.16805	0.12969		13	0.27659	0.02667
586.5	0.28878	0.41089	0.17992	0.23511	0.4267	0.28113	0.35321	0.3002	0.24696	0.33551	0.2094	0.15286	0.14082		13	0.27396	0.02541
587	0.29192	0.42981	0.1621	0.2246	0.43247	0.27686	0.37194	0.30269	0.25015	0.3316	0.16516	0.1567	0.14252		13	0.27219	0.02795
587.5	0.26933	0.42977	0.19113	0.24172	0.42962	0.29872	0.3774	0.30199	0.27287	0.32751	0.18886	0.15331	0.13311		13	0.2781	0.02689
588	0.26042	0.4268	0.18956	0.24079	0.40512	0.27223	0.35891	0.3008	0.24902	0.32052	0.17687	0.16623	0.12388		13	0.26855	0.02568
588.5	0.26657	0.42534	0.17753	0.2337	0.43903	0.30544	0.35751	0.29999	0.25728	0.32116	0.18238	0.15367	0.14407		13	0.27413	0.0268
589	0.2817	0.43392	0.19211	0.2423	0.4079	0.29907	0.37948	0.29798	0.24707	0.32148	0.19412	0.17046	0.12607		13	0.27644	0.026
589.5	0.30776	0.45234	0.17786	0.2339	0.42948	0.29506	0.35678	0.30418	0.24365	0.32537	0.17657	0.16612	0.12319		13	0.27633	0.02814
590	0.26665	0.43862	0.20467	0.24971	0.42471	0.30273	0.37172	0.29731	0.23448	0.34041	0.17006	0.15583	0.15905		13	0.27815	0.02654
590.5	0.2759	0.45212	0.20305	0.24875	0.41648	0.29679	0.33581	0.29275	0.26354	0.32235	0.18062	0.1763	0.12951		13	0.27646	0.02581
591	0.27279	0.42751	0.1822	0.23645	0.39769	0.29431	0.36621	0.29906	0.23282	0.33515	0.17419	0.15155	0.12617		13	0.26893	0.02657
591.5	0.28713	0.4388	0.20769	0.25149	0.39698	0.28988	0.36608	0.29733	0.24931	0.32082	0.17766	0.17131	0.12546		13	0.27538	0.02548
592	0.27461	0.43865	0.17911	0.23463	0.43517	0.2768	0.37016	0.29353	0.24921	0.3361	0.15482	0.1548	0.12332		13	0.27084	0.02873
592.5	0.27993	0.44898	0.19692	0.24514	0.38193	0.29457	0.37006	0.30046	0.25166	0.35094	0.16062	0.18025	0.1342		13	0.27659	0.02618
593	0.28116	0.43554	0.19623	0.24473	0.44062	0.29917	0.35555	0.29883	0.24861	0.33155	0.17779	0.15639	0.1257		13	0.2763	0.02747
593.5	0.27596	0.44689	0.19164	0.24202	0.40689	0.30148	0.37554	0.30292	0.24869	0.33935	0.17909	0.16064	0.14779		13	0.27838	0.02652
594	0.25907	0.44936	0.17665	0.23318	0.42745	0.3018	0.37044	0.30479	0.23501	0.33362	0.20113	0.17088	0.12416		13	0.27597	0.02775
594.5	0.26481	0.42821	0.1945	0.24371	0.42571	0.31921	0.37827	0.30235	0.25091	0.33457	0.16225	0.15391	0.1236		13	0.27554	0.02791
595	0.25912	0.45522	0.18995	0.24103	0.42585	0.32024	0.37975	0.30196	0.24314	0.33333	0.186	0.15476	0.12738		13	0.27829	0.02843
595.5	0.2793	0.43662	0.18415	0.2376	0.41228	0.29867	0.37936	0.30388	0.24706	0.32454	0.17577	0.17066	0.12726		13	0.27516	0.02688
596	0.27274	0.4245	0.18017	0.23526	0.40856	0.27818	0.36471	0.29117	0.24756	0.31649	0.17417	0.14959	0.13689		13	0.26769	0.02605
596.5	0.26159	0.441	0.21196	0.254	0.41848	0.30531	0.34198	0.30013	0.23818	0.33045	0.17895	0.17736	0.13983		13	0.27686	0.02534
597	0.26556	0.43274	0.1808	0.23563	0.43562	0.30141	0.36158	0.30328	0.24949	0.34652	0.16954	0.16123	0.12734		13	0.27467	0.02794
597.5	0.26582	0.4179	0.19045	0.24132	0.43728	0.27544	0.37015	0.29945	0.24934	0.33491	0.18332	0.1553	0.13213		13	0.27329	0.02681
598	0.2603	0.42965	0.15767	0.22199	0.43625	0.28582	0.36426	0.30031	0.24353	0.35079	0.19593	0.15728	0.1315		13	0.27194	0.02805
598.5	0.29745	0.43595	0.17364	0.23141	0.41561	0.29595	0.36941	0.3064	0.25085	0.35023	0.18661	0.16646	0.11195		13	0.2763	0.02786
599	0.2837	0.43088	0.20698	0.25107	0.42773	0.30266	0.37728	0.3103	0.24494	0.34117	0.20702	0.17122	0.11751		13	0.2825	0.02657
599.5	0.29395	0.40807	0.1742	0.23173	0.42763	0.30124	0.37048	0.3024	0.23907	0.34924	0.17132	0.18277	0.11871		13	0.27468	0.02708
600	0.29564	0.42288	0.1923	0.24241	0.41326	0.26322	0.37101	0.30234	0.24776	0.3282	0.19949	0.16402	0.12352		13	0.27431	0.02581
600.5	0.25793	0.4339	0.16119	0.22407	0.44014	0.29561	0.37419	0.3008	0.24106	0.34789	0.19241	0.15311	0.14409		13	0.27434	0.02826
601	0.23681	0.41692	0.19135	0.24185	0.4427	0.28589	0.35381	0.29535	0.22596	0.31448	0.19244	0.17448	0.14662		13	0.27067	0.02553
601.5	0.24274	0.44073	0.17229	0.23061	0.43336	0.30967	0.38467	0.29958	0.24546	0.335	0.17592	0.15777	0.1303		13	0.2737	0.02874
602	0.26655	0.42059	0.1923	0.24241	0.41388	0.30921	0.36405	0.30091	0.26091	0.33343	0.18359	0.16088	0.12802		13	0.27513	0.02592
602.5	0.3065	0.41708	0.16107	0.22399	0.42378	0.29604	0.37979	0.30466	0.23448	0.32499	0.18722	0.16428	0.12816		13	0.27323	0.02737
603	0.27012	0.42699	0.18351	0.23723	0.43239	0.30673	0.37142	0.29637	0.24812	0.32615	0.18172	0.19203	0.11305		13	0.27583	0.02698
603.5	0.26407	0.41814	0.16327	0.22529	0.42854	0.30643	0.36373	0.30553	0.27133	0.3583	0.20185	0.16562	0.12331		13	0.27657	0.02729
604	0.28771	0.41374	0.17651	0.2331	0.42605	0.29283	0.36404	0.29546	0.23684	0.31921	0.22003	0.16577	0.12733		13	0.27374	0.02563
604.5	0.30038	0.432	0.17615	0.23289	0.41302	0.30833	0.35442	0.29907	0.24368	0.33149	0.18519	0.1693	0.12561		13	0.27473	0.02651
605	0.25391	0.42133	0.17705	0.23342	0.43267	0.28656	0.37153	0.30002	0.24253	0.34929	0.17195	0.17083	0.13618		13	0.27287	0.0272
605.5	0.28518	0.43086	0.1951	0.24406	0.40992	0.29744	0.36174	0.30113	0.23548	0.34078	0.20159	0.14949	0.12052		13	0.27487	0.0265
606	0.25698	0.43682	0.17444	0.23188	0.42459	0.29008	0.362	0.2971	0.23731	0.3281	0.19464	0.15371	0.14043		13	0.27139	0.02685
606.5	0.28143	0.41654	0.19645	0.24486	0.39783	0.29383	0.3627	0.30274	0.25078	0.33417	0.19373	0.15681	0.13002		13	0.27399	0.0249
607	0.27351	0.42873	0.17741	0.23363	0.42068	0.30123	0.37334	0.29491	0.2496	0.33976	0.20495	0.16231	0.1378		13	0.27676	0.02632
607.5	0.26085	0.4191	0.19996	0.24693	0.43566	0.282	0.36559	0.30534	0.23628	0.33471	0.1828	0.1694	0.12385		13	0.27404	0.02654
608	0.27884	0.41686	0.18019	0.23527	0.44379	0.28709	0.36856	0.30607	0.24305	0.33476	0.18591	0.15907	0.14481		13	0.27571	0.02679
608.5	0.26159	0.43112	0.18002	0.23517	0.42919	0.30111	0.36788	0.30246	0.22408	0.33068	0.17113	0.15604	0.12185		13	0.27018	0.02805
609	0.27631	0.41349	0.16373	0.22556	0.43405	0.27867	0.37739	0.29409	0.24907	0.33825	0.1799	0.14189	0.14639		13	0.27068	0.02749
609.5	0.26916	0.41909	0.17878	0.23444	0.42276	0.30864	0.3625	0.30483	0.24426	0.34638	0.19842	0.16271	0.1376		13	0.27612	0.02614
610
610.5
611
611.5
612
612.5
613
613.5
614
614.5
615
615.5
616
616.5
617
617.5
618
618.5
619
619.5
620
620.5
621
621.5
622
622.5
623
623.5
624
624.5
625
625.5
626
626.5
627
627.5
628
628.5
629
629.5
630	0.29875	0.41773	0.17912	0.23546	0.42328	0.33034	0.36453	0.30799	0.23707	0.34749	0.19775	0.1632	0.13439		13	0.27978	0.02661
630.5	0.27379	0.39889	0.18233	0.22758	0.39985	0.30457	0.34329	0.30243	0.23746	0.35374	0.19528	0.1779	0.14791		13	0.2727	0.02369
631	0.28529	0.42346	0.19085	0.23136	0.41454	0.31431	0.34725	0.30991	0.22769	0.34855	0.20002	0.16551	0.16649		13	0.27886	0.02473
631.5	0.24625	0.40953	0.17662	0.23383	0.42045	0.31196	0.33589	0.2972	0.2195	0.34377	0.19042	0.16811	0.15535		13	0.26991	0.02499
632	0.29486	0.41796	0.18181	0.23343	0.40229	0.30885	0.3463	0.31408	0.22595	0.35866	0.18663	0.17547	0.15585		13	0.27709	0.02487
632.5	0.25861	0.40724	0.18437	0.22753	0.42343	0.30553	0.33838	0.31063	0.2045	0.34558	0.2053	0.17125	0.15493		13	0.2721	0.02485
633	0.2871	0.39615	0.17563	0.2372	0.39465	0.29988	0.36064	0.30758	0.21434	0.35617	0.20842	0.17278	0.14142		13	0.27323	0.02434
633.5	0.26056	0.39997	0.18003	0.22619	0.43324	0.29299	0.33213	0.3052	0.21276	0.34007	0.18122	0.17819	0.16414		13	0.26975	0.02467
634	0.27411	0.37551	0.18627	0.24397	0.41808	0.29657	0.35711	0.30588	0.22187	0.34588	0.17032	0.16755	0.15446		13	0.27058	0.02431
634.5	0.28896	0.39664	0.18038	0.22453	0.40432	0.3111	0.34013	0.3025	0.24096	0.34085	0.18944	0.16362	0.16127		13	0.27267	0.0237
635	0.27913	0.40898	0.17415	0.22598	0.38999	0.29149	0.35497	0.3092	0.23077	0.34274	0.20072	0.17037	0.15929		13	0.27214	0.02374
635.5	0.28221	0.40578	0.16803	0.23645	0.41056	0.31561	0.33102	0.31358	0.2357	0.33564	0.19809	0.17408	0.16558		13	0.27479	0.02376
636	0.28755	0.38538	0.18382	0.2226	0.4314	0.29819	0.34551	0.31235	0.21712	0.34578	0.19725	0.18208	0.15176		13	0.27391	0.02441
636.5	0.24857	0.42706	0.19457	0.23252	0.4017	0.28908	0.35106	0.31202	0.21259	0.34374	0.19084	0.15222	0.16046		13	0.27049	0.02521
637	0.25416	0.39606	0.18587	0.23527	0.45287	0.32396	0.35075	0.30392	0.22598	0.35054	0.18401	0.15416	0.15019		13	0.27444	0.02677
637.5	0.26569	0.39301	0.18119	0.22598	0.38038	0.30667	0.35385	0.30939	0.23227	0.3643	0.1905	0.17829	0.16476		13	0.27279	0.02308
638	0.28719	0.41467	0.1806	0.23416	0.40784	0.32383	0.34118	0.3099	0.22607	0.3541	0.17736	0.16919	0.14509		13	0.27471	0.02559
638.5	0.26622	0.39584	0.18142	0.222	0.42619	0.31696	0.34656	0.31565	0.22148	0.33162	0.18091	0.15187	0.17772		13	0.27188	0.02494
639	0.23617	0.39245	0.18418	0.21667	0.42154	0.28225	0.33603	0.30773	0.22322	0.34781	0.19131	0.1582	0.14831		13	0.26507	0.02489
639.5	0.28399	0.40157	0.17856	0.21622	0.41884	0.30261	0.34103	0.31027	0.23982	0.33844	0.1748	0.16393	0.13337		13	0.2695	0.02572
640	0.27408	0.39241	0.17659	0.224	0.41497	0.32709	0.32723	0.30672	0.23062	0.34106	0.19302	0.16738	0.1748		13	0.27307	0.02358
640.5	0.29134	0.40507	0.16932	0.21841	0.4027	0.29239	0.32747	0.30552	0.19937	0.35134	0.17651	0.16835	0.17431		13	0.26785	0.02454
641	0.2499	0.40283	0.15859	0.2131	0.42455	0.29237	0.33923	0.31347	0.2377	0.36163	0.1692	0.16543	0.15026		13	0.26756	0.0265
641.5	0.28109	0.39151	0.16303	0.22809	0.4248	0.31542	0.33548	0.31135	0.23699	0.3672	0.18708	0.14407	0.14969		13	0.27198	0.02629
642	0.26646	0.39426	0.17427	0.22499	0.42556	0.33154	0.34306	0.2984	0.22806	0.35758	0.17506	0.15223	0.15172		13	0.27101	0.0262
642.5	0.25504	0.38682	0.16557	0.21383	0.43966	0.28651	0.35501	0.31143	0.21992	0.36662	0.18036	0.16795	0.1438		13	0.26865	0.02681
643	0.27882	0.39731	0.18166	0.21748	0.38829	0.29601	0.32923	0.31421	0.22522	0.34246	0.18555	0.15533	0.16926		13	0.26776	0.02329
643.5	0.2894	0.41216	0.18061	0.21708	0.41434	0.31218	0.34629	0.31006	0.23058	0.33863	0.206	0.16689	0.16299		13	0.27594	0.02447
644	0.26632	0.40901	0.18362	0.22125	0.41301	0.31338	0.34169	0.31301	0.22531	0.34871	0.19713	0.15833	0.14713		13	0.27215	0.02526
644.5	0.24713	0.42101	0.16517	0.21711	0.42705	0.31432	0.34327	0.31805	0.22422	0.3369	0.18545	0.17542	0.14859		13	0.27105	0.02641
645	0.31304	0.41659	0.18333	0.22108	0.40983	0.31634	0.34786	0.31077	0.21623	0.35326	0.20047	0.15208	0.14358		13	0.27573	0.02616
645.5	0.27941	0.40655	0.17509	0.21292	0.40363	0.28861	0.35712	0.30677	0.22669	0.3659	0.17103	0.17308	0.15205		13	0.27068	0.02561
646	0.25901	0.38864	0.17684	0.22915	0.44833	0.31079	0.34352	0.30994	0.23395	0.35622	0.17649	0.16397	0.13983		13	0.27205	0.02663
646.5	0.27494	0.40466	0.15928	0.22084	0.40696	0.29849	0.34185	0.31081	0.23533	0.35008	0.169	0.17668	0.1682		13	0.27055	0.02482
647	0.26615	0.40709	0.17906	0.23754	0.40461	0.29694	0.34583	0.31282	0.23472	0.33838	0.17657	0.16323	0.16599		13	0.27146	0.02421
647.5	0.26139	0.38977	0.17918	0.22623	0.41115	0.32309	0.3438	0.31175	0.22545	0.34636	0.18281	0.17826	0.13539		13	0.27036	0.02487
648	0.28159	0.40951	0.16598	0.21964	0.38554	0.30717	0.33822	0.3141	0.23636	0.35627	0.17818	0.16109	0.15268		13	0.26972	0.02492
648.5	0.25914	0.40905	0.19462	0.21773	0.4101	0.3227	0.3404	0.30944	0.24417	0.35988	0.16412	0.15406	0.1621		13	0.27288	0.02553
649	0.28656	0.39449	0.18468	0.22435	0.39225	0.31163	0.35525	0.31091	0.24167	0.34932	0.17833	0.17772	0.14134		13	0.27296	0.02418
649.5	0.27222	0.40773	0.19488	0.21664	0.39481	0.31157	0.33556	0.31131	0.2272	0.35123	0.16408	0.1613	0.16387		13	0.27018	0.02448
650	0.2688	0.40648	0.18373	0.22982	0.41676	0.30587	0.353	0.3085	0.22861	0.3622	0.18913	0.17575	0.14814		13	0.27514	0.02519
650.5	0.2602	0.3921	0.19412	0.22336	0.41436	0.29493	0.34775	0.31144	0.2252	0.35368	0.18785	0.16041	0.17035		13	0.27198	0.02399
651	0.2751	0.42193	0.17699	0.22621	0.41729	0.30039	0.3493	0.30663	0.24605	0.33241	0.19804	0.16889	0.14008		13	0.27379	0.02538
651.5	0.26045	0.40635	0.17651	0.23147	0.41913	0.30296	0.33895	0.30881	0.23846	0.3444	0.1964	0.15955	0.15998		13	0.27257	0.02463
652	0.26753	0.37694	0.1608	0.23066	0.39541	0.30489	0.34775	0.30999	0.22995	0.34887	0.18724	0.17621	0.13449		13	0.26698	0.02418
652.5	0.28464	0.39139	0.17175	0.23668	0.41143	0.32414	0.33768	0.30859	0.23715	0.35527	0.18349	0.17664	0.12975		13	0.27297	0.02517
653	0.27569	0.38819	0.18667	0.22208	0.39901	0.27849	0.3437	0.30402	0.22717	0.35525	0.18917	0.16347	0.16816		13	0.26931	0.02319
653.5	0.27205	0.39116	0.17171	0.22876	0.42049	0.31086	0.35662	0.31296	0.2182	0.35768	0.1795	0.16496	0.14918		13	0.27186	0.0258
654	0.27664	0.40253	0.17623	0.21691	0.42481	0.3035	0.34978	0.31476	0.22734	0.3649	0.17879	0.16084	0.14106		13	0.27216	0.02659
654.5	0.29888	0.38918	0.17596	0.23298	0.39942	0.31582	0.35162	0.31195	0.22567	0.35829	0.18245	0.14761	0.16842		13	0.27371	0.02469
655	0.27123	0.42664	0.15803	0.2252	0.39223	0.32493	0.34333	0.30816	0.23169	0.34485	0.18619	0.16123	0.15249		13	0.27125	0.02577
655.5	0.30851	0.40495	0.17599	0.21896	0.4139	0.31745	0.34339	0.32104	0.2417	0.34952	0.17826	0.16411	0.15566		13	0.27642	0.02549
656	0.29315	0.37708	0.16246	0.22264	0.41515	0.2962	0.35984	0.30953	0.22909	0.36067	0.20576	0.17347	0.15568		13	0.2739	0.02447
656.5	0.27303	0.39846	0.17573	0.22122	0.43634	0.27448	0.35797	0.3152	0.21575	0.35635	0.15572	0.16543	0.15706		13	0.26944	0.02684
657	0.29008	0.38759	0.18627	0.22035	0.40079	0.28024	0.35311	0.32034	0.24331	0.34686	0.18501	0.15612	0.1607		13	0.2716	0.0239
657.5	0.28804	0.41206	0.16854	0.22742	0.43177	0.31045	0.35001	0.31127	0.22377	0.33856	0.1949	0.15955	0.15494		13	0.27471	0.02609
658	0.26888	0.39239	0.18297	0.22466	0.41167	0.28394	0.34143	0.30854	0.23107	0.33842	0.18848	0.15883	0.15226		13	0.26796	0.02408
658.5	0.23702	0.40825	0.16462	0.22561	0.40519	0.31203	0.34167	0.31228	0.22717	0.36737	0.18996	0.16186	0.14828		13	0.26933	0.02588
659	0.26512	0.37527	0.17392	0.22004	0.42155	0.30415	0.34253	0.30813	0.21759	0.33098	0.18109	0.15318	0.13871		13	0.26402	0.02512
659.5	0.28157	0.40178	0.16933	0.22128	0.41354	0.3018	0.34063	0.30372	0.2526	0.34986	0.17816	0.15693	0.16384		13	0.27192	0.02492
660	0.28038	0.40146	0.17227	0.22795	0.41424	0.31717	0.33506	0.30747	0.23012	0.36081	0.19651	0.15527	0.14714		13	0.27276	0.02542
660.5	0.28775	0.39876	0.17183	0.22815	0.41179	0.30555	0.34716	0.30797	0.22183	0.34661	0.17118	0.16398	0.15149		13	0.27031	0.02535
661	0.25529	0.40142	0.17182	0.23054	0.39661	0.30465	0.3627	0.30182	0.22416	0.35038	0.16392	0.17871	0.14557		13	0.26827	0.02521
661.5	0.28288	0.40689	0.17515	0.22649	0.41471	0.28911	0.34259	0.31496	0.24035	0.33624	0.17881	0.15762	0.1592		13	0.27116	0.02492
662	0.28987	0.4053	0.17669	0.2207	0.41036	0.295	0.34747	0.30138	0.22213	0.34858	0.1767	0.17396	0.1376		13	0.26967	0.02545
662.5	0.26332	0.38004	0.16654	0.22281	0.42357	0.32197	0.34434	0.31778	0.21627	0.36078	0.19126	0.15365	0.15829		13	0.27082	0.02563
663	0.26157	0.38626	0.17499	0.21381	0.40901	0.29679	0.35718	0.31223	0.22246	0.35807	0.1801	0.15839	0.17439		13	0.26964	0.02466
663.5	0.27165	0.37833	0.16433	0.22319	0.398	0.31437	0.35149	0.30925	0.22878	0.34692	0.18301	0.1769	0.16069		13	0.26976	0.02367
664	0.25219	0.39617	0.19142	0.21264	0.45402	0.26977	0.36714	0.31431	0.22492	0.32908	0.18255	0.17376	0.15421		13	0.27094	0.02616
664.5	0.26019	0.38854	0.19179	0.2111	0.42278	0.2732	0.37272	0.30351	0.2195	0.33497	0.18804	0.17058	0.17953		13	0.2705	0.02406
665	0.27204	0.38795	0.16014	0.21257	0.40917	0.30246	0.34009	0.30053	0.22406	0.34933	0.19345	0.18509	0.17608		13	0.27023	0.02346
665.5	0.26644	0.36462	0.18877	0.21902	0.40681	0.30107	0.34956	0.31217	0.23619	0.34071	0.22189	0.17774	0.17087		13	0.27353	0.02157
666	0.27846	0.38525	0.18664	0.22231	0.4249	0.31645	0.33546	0.30502	0.23873	0.35069	0.21899	0.19881	0.1488		13	0.27773	0.02311
666.5	0.26715	0.39406	0.19247	0.22218	0.39583	0.2827	0.35318	0.30772	0.23539	0.3589	0.19674	0.19469	0.15849		13	0.27381	0.0227
667	0.2642	0.38699	0.17675	0.22528	0.42901	0.32017	0.34262	0.30464	0.22446	0.34367	0.19691	0.18387	0.15278		13	0.27318	0.02436
667.5	0.25391	0.36902	0.16826	0.22161	0.42189	0.32045	0.33782	0.31238	0.2261	0.35596	0.23221	0.19722	0.16479		13	0.27551	0.02286
668	0.27056	0.38526	0.1764	0.21018	0.39936	0.29835	0.3443	0.31153	0.22594	0.3338	0.2324	0.21902	0.16649		13	0.27489	0.02131
668.5	0.26838	0.3898	0.16385	0.23838	0.41511	0.28298	0.34229	0.30567	0.23543	0.33146	0.21311	0.20482	0.15848		13	0.27306	0.02252
669	0.26085	0.38558	0.17951	0.2201	0.42399	0.28584	0.35787	0.30778	0.21972	0.33633	0.21416	0.19937	0.16328		13	0.27341	0.02314
669.5	0.25921	0.38337	0.17136	0.2264	0.38187	0.29458	0.33493	0.30261	0.22481	0.33634	0.23346	0.18226	0.15935		13	0.2685	0.02129
670	0.25922	0.37293	0.18091	0.22553	0.42004	0.29778	0.35255	0.31109	0.23055	0.35516	0.22303	0.19076	0.16577		13	0.27579	0.02266
670.5	0.29569	0.39567	0.17583	0.2206	0.42302	0.27396	0.35584	0.30837	0.22716	0.35507	0.20619	0.20416	0.17769		13	0.2784	0.02336
671	0.28389	0.38511	0.18217	0.23107	0.39827	0.29379	0.34833	0.31525	0.23207	0.36183	0.22919	0.17742	0.16627		13	0.27728	0.02237
671.5	0.2446	0.39386	0.1649	0.22019	0.38873	0.2707	0.34649	0.3122	0.23206	0.33323	0.20146	0.20832	0.17239		13	0.26839	0.02188
672	0.2539	0.38347	0.18649	0.21864	0.44185	0.26781	0.33208	0.31085	0.22261	0.36685	0.22131	0.19819	0.15316		13	0.27363	0.02408
672.5	0.28264	0.37543	0.19361	0.22443	0.41618	0.29313	0.34003	0.31186	0.22045	0.34699	0.22979	0.21295	0.17567		13	0.27871	0.02102
673	0.2318	0.38451	0.19	0.22359	0.42127	0.30905	0.35861	0.31243	0.23625	0.34248	0.20004	0.19076	0.15125		13	0.27323	0.02385
673.5	0.27264	0.38495	0.1706	0.22218	0.41461	0.30792	0.34549	0.31157	0.23284	0.34578	0.19867	0.1988	0.14419		13	0.27309	0.02377
674	0.27031	0.40078	0.16303	0.21666	0.4157	0.25653	0.35588	0.30296	0.22069	0.35827	0.21938	0.20366	0.16405		13	0.27292	0.02396
674.5	0.25694	0.39645	0.18563	0.22146	0.41211	0.30054	0.34617	0.29588	0.21697	0.3527	0.20655	0.1708	0.16479		13	0.27131	0.02372
675	0.2547	0.37039	0.17805	0.22673	0.42483	0.2775	0.35148	0.30741	0.21565	0.33002	0.21855	0.19891	0.16405		13	0.27064	0.02239
675.5	0.27915	0.39685	0.1734	0.22482	0.41181	0.29289	0.35585	0.31661	0.22859	0.33113	0.2236	0.19887	0.1537		13	0.27594	0.02313
676	0.25637	0.39188	0.18989	0.22523	0.428	0.28904	0.34454	0.30554	0.22123	0.34843	0.21507	0.18577	0.16577		13	0.27436	0.02332
676.5	0.28071	0.39371	0.18553	0.22599	0.43592	0.3064	0.3293	0.31114	0.23709	0.36659	0.21944	0.18887	0.16723		13	0.28061	0.02364
677	0.26848	0.39271	0.20484	0.22653	0.41877	0.28891	0.34852	0.3125	0.21367	0.35143	0.19181	0.19989	0.14984		13	0.27445	0.02357
677.5	0.24941	0.36005	0.18601	0.23427	0.43938	0.28664	0.36038	0.30598	0.23195	0.35788	0.22201	0.18752	0.15646		13	0.27523	0.02349
678	0.27362	0.37566	0.18017	0.22388	0.404	0.28867	0.34246	0.31183	0.21725	0.34477	0.21261	0.18728	0.13857		13	0.26929	0.02299
678.5	0.2713	0.38301	0.18485	0.22509	0.41622	0.293	0.3483	0.30763	0.22944	0.36195	0.2016	0.19285	0.16384		13	0.27531	0.02308
679	0.25831	0.40066	0.18826	0.2192	0.4076	0.29106	0.36903	0.31023	0.24646	0.34568	0.19107	0.1972	0.16263		13	0.27595	0.0235
679.5	0.2441	0.39557	0.18401	0.21607	0.426	0.29409	0.35801	0.31139	0.21917	0.35464	0.20297	0.20882	0.14705		13	0.27399	0.02455
680	0.27967	0.3845	0.174	0.2376	0.42473	0.28134	0.34386	0.32108	0.23112	0.34397	0.20238	0.19293	0.13492		13	0.27324	0.02418
680.5	0.24136	0.38023	0.16172	0.21895	0.41062	0.29109	0.34346	0.31488	0.22776	0.34639	0.20439	0.19693	0.15518		13	0.26869	0.02339
681	0.27385	0.40313	0.17542	0.21673	0.41427	0.29014	0.35655	0.3093	0.22803	0.33462	0.21927	0.211	0.14118		13	0.27488	0.02376
681.5	0.2433	0.37996	0.18054	0.22113	0.40184	0.29592	0.33786	0.30923	0.23523	0.36506	0.20054	0.18422	0.15591		13	0.27006	0.02304
682	0.237	0.40234	0.18514	0.21044	0.42181	0.28778	0.35239	0.30993	0.21737	0.34768	0.21558	0.16877	0.16756		13	0.27106	0.02449
682.5	0.25675	0.38217	0.17575	0.21794	0.4089	0.26545	0.34792	0.30964	0.23769	0.35406	0.20993	0.18402	0.14762		13	0.26906	0.0234
683	0.25698	0.39597	0.16789	0.21773	0.39819	0.30328	0.34857	0.3107	0.20696	0.34703	0.20574	0.19174	0.14505		13	0.26891	0.02406
683.5	0.2369	0.39196	0.1695	0.2301	0.42248	0.27891	0.35374	0.3162	0.22329	0.34498	0.17732	0.18436	0.16223		13	0.26861	0.02474
684	0.25268	0.38935	0.18112	0.22059	0.41553	0.30157	0.33875	0.30465	0.2515	0.33586	0.21764	0.19491	0.15796		13	0.27401	0.02242
684.5	0.26174	0.39552	0.16757	0.2267	0.41429	0.29979	0.35712	0.3098	0.23321	0.35775	0.20233	0.17743	0.15332		13	0.27358	0.02464
685	0.26079	0.37664	0.18156	0.22418	0.41596	0.28043	0.35059	0.31407	0.2333	0.36143	0.20221	0.17985	0.15794		13	0.27223	0.0235
685.5	0.26511	0.38619	0.18033	0.22449	0.43082	0.29871	0.35584	0.31535	0.20562	0.35569	0.17568	0.16387	0.14236		13	0.26924	0.02627
686	0.26756	0.39098	0.17122	0.2116	0.39706	0.28636	0.33874	0.30552	0.21631	0.34754	0.20763	0.17115	0.15857		13	0.26694	0.02335
686.5	0.26514	0.39035	0.18844	0.22331	0.39623	0.26592	0.3445	0.31315	0.23742	0.34976	0.21392	0.16241	0.15485		13	0.26965	0.02294
687	0.27096	0.37993	0.1918	0.21383	0.41623	0.29981	0.34079	0.31313	0.22705	0.33991	0.17923	0.15337	0.13349		13	0.26612	0.025
687.5	0.26039	0.3781	0.16748	0.22019	0.40995	0.29501	0.3639	0.309	0.22518	0.36748	0.19643	0.1829	0.1561		13	0.2717	0.02439
688	0.24809	0.36891	0.16556	0.2134	0.41269	0.28462	0.35846	0.3061	0.22641	0.36187	0.17106	0.16986	0.14599		13	0.26408	0.02521
688.5	0.29441	0.37454	0.18362	0.21203	0.41076	0.27983	0.35444	0.31222	0.23366	0.3496	0.16177	0.16934	0.16026		13	0.26896	0.02438
689	0.28073	0.38673	0.2077	0.22131	0.41462	0.30062	0.34347	0.30723	0.23582	0.35071	0.19071	0.15133	0.16573		13	0.27359	0.02367
689.5	0.26776	0.35491	0.18908	0.20975	0.4126	0.25639	0.35142	0.30971	0.22663	0.35317	0.19949	0.18167	0.16202		13	0.26728	0.02254
690	0.25374	0.38242	0.2035	0.20632	0.41969	0.2851	0.36455	0.30964	0.2081	0.35905	0.20257	0.18167	0.17686		13	0.27332	0.02364
690.5	0.2641	0.36443	0.17773	0.21273	0.38211	0.2995	0.32089	0.31135	0.23505	0.34194	0.19412	0.17253	0.14802		13	0.26342	0.02185
691	0.26021	0.37998	0.18458	0.21288	0.38123	0.28739	0.35252	0.31053	0.23513	0.35043	0.19246	0.15267	0.15115		13	0.26547	0.02337
691.5	0.24354	0.36241	0.17023	0.20746	0.37845	0.29172	0.33917	0.30815	0.22542	0.34096	0.19523	0.15776	0.172		13	0.26096	0.02197
692	0.26397	0.38518	0.18328	0.21008	0.41846	0.27654	0.32379	0.31199	0.22519	0.36046	0.19632	0.16183	0.15858		13	0.26736	0.02413
692.5	0.27491	0.38786	0.16127	0.21269	0.39874	0.30416	0.35265	0.29946	0.22053	0.35474	0.19783	0.17782	0.14222		13	0.26807	0.02456
693	0.28085	0.38631	0.17609	0.21126	0.38906	0.27841	0.33768	0.30975	0.21553	0.34802	0.19437	0.18107	0.16124		13	0.2669	0.02275
693.5	0.28679	0.37713	0.19264	0.2193	0.39618	0.28628	0.33649	0.31094	0.23054	0.33518	0.17365	0.18299	0.12371		13	0.26552	0.02353
694	0.27094	0.36367	0.17951	0.22775	0.40168	0.28114	0.35535	0.31491	0.22466	0.34663	0.18821	0.15364	0.15516		13	0.2664	0.02357
694.5	0.26714	0.36983	0.16713	0.21307	0.37143	0.28657	0.33231	0.31027	0.22547	0.35636	0.18712	0.18345	0.14577		13	0.26276	0.02242
695	0.27691	0.38511	0.19062	0.2161	0.39016	0.29396	0.34576	0.30246	0.23142	0.35202	0.19853	0.1664	0.1484		13	0.26907	0.02309
695.5	0.26584	0.3779	0.18136	0.21248	0.39133	0.25232	0.33593	0.31154	0.21781	0.34703	0.20202	0.17905	0.15837		13	0.26408	0.02229
696	0.24838	0.37516	0.17497	0.21949	0.39564	0.28538	0.34187	0.30195	0.23401	0.3424	0.20083	0.16347	0.16275		13	0.2651	0.02253
696.5	0.27618	0.38127	0.18624	0.20981	0.37821	0.28489	0.32428	0.31292	0.22146	0.34137	0.18689	0.1686	0.16747		13	0.26458	0.02186
697	0.26503	0.40202	0.17097	0.22345	0.3788	0.27995	0.33941	0.31168	0.23857	0.35178	0.18878	0.16316	0.13049		13	0.26493	0.02438
697.5	0.28401	0.37809	0.16168	0.21155	0.39956	0.27977	0.32853	0.30331	0.23618	0.34679	0.18785	0.17823	0.15548		13	0.26546	0.02314
698	0.26733	0.37466	0.15568	0.21872	0.38939	0.24229	0.34547	0.3102	0.23267	0.35017	0.19694	0.17078	0.16413		13	0.26296	0.02301
698.5	0.28184	0.3888	0.15983	0.2183	0.39178	0.26239	0.34753	0.30798	0.21561	0.34036	0.20181	0.16143	0.14481		13	0.26327	0.02413
699	0.24377	0.38725	0.16079	0.21982	0.3919	0.26714	0.33974	0.3076	0.2363	0.34627	0.19245	0.16015	0.16211		13	0.26271	0.02348
699.5	0.27769	0.39015	0.19222	0.21602	0.38315	0.27103	0.34116	0.30223	0.22625	0.35431	0.17361	0.15929	0.14151		13	0.26374	0.02388
700
700.5
701
701.5
702
702.5
703
703.5
704
704.5
705
705.5
706
706.5
707
707.5
708
708.5
709
709.5
710
710.5
711
711.5
712
712.5
713
713.5
714
714.5
715
715.5
716
716.5
717
717.5
718
718.5
719
719.5
720	0.27905	0.39206	0.20395	0.21919	0.38411	0.24089	0.3384	0.30188	0.22218	0.35546	0.19858	0.15989	0.14101		13	0.26436	0.02328
720.5	0.27129	0.41098	0.20386	0.2091	0.39088	0.22216	0.34065	0.30665	0.21966	0.35302	0.18752	0.16928	0.13736		13	0.26326	0.02462
721	0.26235	0.39596	0.21611	0.21486	0.37572	0.22444	0.34622	0.29959	0.20509	0.36104	0.19573	0.15733	0.15607		13	0.26235	0.02331
721.5	0.27908	0.38836	0.19549	0.20848	0.36491	0.25563	0.34031	0.30134	0.22127	0.37288	0.18452	0.16645	0.12972		13	0.26219	0.02381
722	0.27846	0.39335	0.17562	0.20467	0.36689	0.22402	0.33765	0.30062	0.21151	0.35765	0.17095	0.15713	0.15303		13	0.25627	0.02407
722.5	0.27239	0.41407	0.19559	0.22886	0.37391	0.20869	0.3275	0.30236	0.22965	0.35579	0.19739	0.1586	0.14185		13	0.26205	0.02391
723	0.29063	0.40843	0.1889	0.22683	0.37544	0.22571	0.33726	0.30588	0.21877	0.36651	0.19195	0.14957	0.14191		13	0.26368	0.02472
723.5	0.27718	0.3836	0.18386	0.22461	0.37883	0.27012	0.33639	0.30059	0.22981	0.34986	0.19081	0.13314	0.1387		13	0.26134	0.02387
724	0.26668	0.39636	0.20185	0.22466	0.39593	0.24063	0.3291	0.28821	0.22583	0.36704	0.17968	0.15798	0.12522		13	0.26148	0.02472
724.5	0.27338	0.38668	0.18665	0.21419	0.36815	0.22356	0.32865	0.30646	0.22657	0.35676	0.17376	0.15611	0.1526		13	0.25796	0.02318
725	0.28567	0.39589	0.18158	0.22119	0.35701	0.2226	0.32287	0.29568	0.23019	0.35299	0.17352	0.14395	0.13378		13	0.25515	0.02388
725.5	0.25442	0.3897	0.18121	0.23252	0.37813	0.23974	0.34608	0.30237	0.23166	0.34978	0.18018	0.15398	0.1179		13	0.25828	0.02455
726	0.27236	0.3739	0.1929	0.23666	0.36126	0.22629	0.3444	0.29691	0.22185	0.35225	0.1801	0.14795	0.11671		13	0.25566	0.02365
726.5	0.28578	0.39294	0.18414	0.23484	0.36359	0.22752	0.34235	0.29725	0.2234	0.3601	0.16832	0.13476	0.11849		13	0.25642	0.02532
727	0.25849	0.38328	0.17146	0.24084	0.38407	0.23441	0.33376	0.29894	0.21356	0.36091	0.16685	0.15436	0.12038		13	0.25549	0.02504
727.5	0.2783	0.39358	0.1909	0.22825	0.38727	0.24207	0.33916	0.29813	0.22608	0.36287	0.18381	0.14716	0.1119		13	0.26073	0.02537
728	0.2927	0.40492	0.18441	0.23104	0.36737	0.24168	0.32529	0.30465	0.22442	0.35093	0.1802	0.12623	0.12065		13	0.25804	0.02531
728.5	0.28219	0.40333	0.16686	0.23593	0.39085	0.23387	0.36159	0.30049	0.23887	0.36892	0.15818	0.12964	0.11369		13	0.26034	0.02787
729	0.26524	0.39581	0.18346	0.24125	0.34461	0.21393	0.33461	0.29688	0.22862	0.35986	0.17632	0.13424	0.10375		13	0.2522	0.0251
729.5	0.26398	0.40038	0.16864	0.24628	0.36254	0.23464	0.33826	0.30351	0.23248	0.38198	0.16997	0.13087	0.11032		13	0.25722	0.02657
730	0.25931	0.39142	0.16695	0.24237	0.36005	0.22809	0.33491	0.30799	0.24323	0.35372	0.16863	0.14444	0.10438		13	0.25427	0.02529
730.5	0.26213	0.38848	0.18515	0.24798	0.365	0.22941	0.34131	0.29359	0.2458	0.34791	0.17533	0.12819	0.11611		13	0.25588	0.02467
731	0.29382	0.3745	0.20154	0.24754	0.36027	0.22059	0.35205	0.30421	0.24195	0.37126	0.17083	0.13196	0.13262		13	0.26178	0.02443
731.5	0.30699	0.39029	0.17877	0.23996	0.37647	0.24082	0.32686	0.29985	0.2363	0.35222	0.1688	0.14802	0.11355		13	0.25991	0.02501
732	0.27228	0.39835	0.18953	0.2447	0.35617	0.21798	0.3378	0.30175	0.24284	0.36803	0.18495	0.14427	0.10933		13	0.25907	0.02493
732.5	0.27234	0.41896	0.19659	0.24704	0.34895	0.25776	0.33482	0.30752	0.26986	0.37146	0.17027	0.14417	0.11048		13	0.2654	0.02549
733	0.22235	0.35637	0.14403	0.22074	0.29375	0.22031	0.27489	0.2901	0.20905	0.28407	0.15804	0.12942	0.12747		13	0.22543	0.01997
733.5	0.40745	0.36877	0.25364	0.22041	0.23399	0.23151	0.21355	0.2703	0.22743	0.2399	0.17595	0.13982	0.09963		13	0.2371	0.02276
734	0.65436	0.67404	0.58215	0.54782	0.51643	0.52822	0.44977	0.52667	0.48829	0.52604	0.16536	0.13789	0.12351		13	0.45543	0.05234
734.5	0.67831	0.73738	0.64005	0.64293	0.64839	0.6323	0.61083	0.63737	0.62624	0.67448	0.15887	0.13866	0.11452		13	0.53387	0.06334
735	0.84601	0.90087	0.85566	0.81288	0.83631	0.78285	0.86334	0.84901	0.82086	0.89094	0.19008	0.13484	0.09923		13	0.6833	0.08626
735.5	0.93679	0.91597	0.92716	0.92302	0.89612	0.89412	0.93966	0.94932	0.89779	0.93215	0.19958	0.15344	0.11903		13	0.74493	0.09314
736	0.94414	0.94082	0.99448	0.99035	0.95398	0.90951	0.96424	0.97396	0.97524	0.9564	0.19724	0.16168	0.1125		13	0.77496	0.09799
736.5	0.95679	0.9879	0.99724	0.98024	0.95346	0.91045	0.9808	0.97885	0.97251	0.9583	0.23768	0.15272	0.12179		13	0.78375	0.09734
737	0.90666	0.96168	0.96054	0.99387	0.97845	0.92834	0.96319	0.9821	0.977	1	0.29503	0.23007	0.27753		13	0.80419	0.08522
737.5	0.95149	0.96432	1	0.98046	0.96554	0.94913	0.97948	0.98261	0.9966	0.97805	0.70742	0.70458	0.78723		13	0.91899	0.03015
738	0.95587	0.95943	0.98992	0.99166	0.98197	0.95736	0.97894	0.996	0.96977	0.96334	0.81681	0.83992	0.86698		13	0.94369	0.01685
738.5	0.98986	0.99276	0.97776	1	0.95549	0.9701	0.9657	0.99179	0.98857	0.97842	0.8619	0.89814	0.89644		13	0.959	0.01232
739	1	0.97587	0.97591	0.9775	0.96639	0.95457	0.98832	0.99189	0.96938	0.98485	0.87453	0.92731	0.94559		13	0.96401	0.00926
739.5	0.97949	0.98027	0.99395	0.97929	0.97824	0.96548	0.96241	0.98882	1	0.98276	0.88802	0.94872	0.97553		13	0.971	0.00785
740	0.94387	1	0.99835	0.993	0.96526	0.97132	1	1	0.97371	0.96933	0.94375	0.95319	0.95757		13	0.97457	0.006
740.5	0.9614	0.95819	0.97296	0.9953	1	0.96128	0.99353	0.99544	0.992	0.97017	0.94443	0.96129	0.98353		13	0.97612	0.00503
741	0.98185	0.96524	0.98526	0.98734	0.95428	1	0.96942	0.98872	0.9664	0.96071	0.95372	0.97884	0.97644		13	0.97448	0.00394
741.5	0.97819	0.97085	0.98391	0.99711	0.98311	0.95199	0.97082	0.99223	0.98931	0.96583	0.93692	0.99336	0.9876		13	0.97702	0.00486
742	0.97903	0.93845	0.9789	0.98057	0.97684	0.96033	0.97036	0.99043	0.96529	0.94681	0.96478	0.97769	0.98728		13	0.97052	0.00421
742.5	0.94735	0.93969	0.9615	0.99596	0.9418	0.95252	0.97396	0.97113	0.96244	0.95956	0.95759	0.99235	1		13	0.96584	0.00554
743	0.97655	0.97808	0.9534	0.96747	0.95165	0.9242	0.95193	0.97825	0.97013	0.95871	0.94683	0.98848	0.98586		13	0.96397	0.00507
743.5	0.92822	0.96236	0.95168	0.99073	0.9503	0.97656	0.95841	0.96659	0.97239	0.9327	0.96216	0.99086	0.99608		13	0.96454	0.00585
744	0.9407	0.91844	0.97238	0.97293	0.93381	0.98333	0.96174	0.96985	0.95824	0.9558	0.94665	0.96967	0.9872		13	0.95929	0.00553
744.5	0.94129	0.93721	0.95421	0.9756	0.9292	0.93945	0.95622	0.96626	0.98095	0.93703	0.96406	0.98404	0.98186		13	0.95749	0.00539
745	0.95707	0.91743	0.95755	0.98085	0.95817	0.95195	0.95431	0.96724	0.94229	0.93592	0.98043	0.98531	0.97799		13	0.95896	0.00547
745.5	0.95462	0.9001	0.94762	0.95293	0.93975	0.95388	0.94369	0.96664	0.95344	0.93757	0.97491	0.97741	0.95286		13	0.95042	0.00537
746	0.9339	0.90128	0.93034	0.97925	0.94243	0.9587	0.91451	0.95248	0.92121	0.92091	0.96119	0.98688	0.94111		13	0.94186	0.007
746.5	0.96902	0.89313	0.95401	0.96725	0.91537	0.9475	0.91646	0.94419	0.93049	0.91152	0.92608	1	0.9877		13	0.94329	0.00879
747	0.898	0.88338	0.95739	0.9535	0.94668	0.93705	0.93519	0.94852	0.92621	0.91744	0.95907	0.9827	0.97084		13	0.93969	0.00778
747.5	0.92617	0.8976	0.92882	0.95562	0.88704	0.93367	0.92383	0.94823	0.92938	0.92159	0.96522	0.97531	0.95615		13	0.93451	0.00704
748	0.89718	0.89201	0.92563	0.96075	0.9355	0.93189	0.92303	0.9436	0.92684	0.92378	0.95461	0.99426	0.981		13	0.9377	0.00815
748.5	0.95045	0.87035	0.91833	0.94227	0.92032	0.92555	0.91726	0.94111	0.93119	0.90414	0.96756	0.97892	0.94996		13	0.93211	0.00779
749	0.91056	0.87864	0.91457	0.94885	0.93335	0.89499	0.91474	0.92794	0.92508	0.91162	0.98102	0.99034	0.954		13	0.92967	0.00887
749.5	0.92125	0.86435	0.93588	0.95498	0.90746	0.92865	0.91106	0.9197	0.91532	0.90903	0.9554	0.95132	0.95252		13	0.92515	0.00715
750	0.91157	0.88324	0.91481	0.93578	0.90817	0.92311	0.91308	0.93449	0.91385	0.91991	1	0.95219	0.93342		13	0.92643	0.00769
rerative DF	AM251
sec	Exp #1	#2	#3	#4	#5	#6	#7		N	Average	SEM
-90	-0.01221	-0.00152	0.02092	-0.01568	0.00507	-0.00451	-0.00486		7	-0.00183	0.00458
-89.5	0.00069	-0.01373	0.03428	-0.00912	0.01313	-0.00495	-0.00533		7	0.00214	0.00625
-89	-0.0027	0.00185	0.04813	-0.03305	0.00818	-0.00044	-0.00048		7	0.00307	0.00903
-88.5	0.00353	-0.0042	0.02473	-0.01251	0.01506	-0.00213	-0.0023		7	0.00317	0.00479
-88	-0.01541	-0.01456	0.01558	-0.02393	0.01164	0.01069	0.01152		7	-0.00064	0.00626
-87.5	-0.01136	0.00522	0.01473	-0.04636	0.00997	-0.0034	-0.00367		7	-0.00498	0.00767
-87	0.00559	-0.00383	0.01883	-0.0352	0.01269	0.01089	0.01174		7	0.00296	0.00689
-86.5	0.00153	0.00831	0.04403	-0.04402	0.01319	-0.00696	-0.0075		7	0.00123	0.01002
-86	-0.0046	-0.006	0.00528	-0.02643	0.00692	0.00315	0.0034		7	-0.00261	0.00438
-85.5	0.00183	0.00684	-0.00473	-0.03807	0.01054	0.01024	0.01103		7	-0.00033	0.00665
-85	-0.00448	-0.0082	0.00948	-0.0051	0.01671	-0.00063	-0.00068		7	0.00101	0.00337
-84.5	-0.01122	-0.00571	0.01715	-0.02274	0.01443	0.00834	0.00899		7	0.00132	0.0056
-84	-0.01184	0.00045	0.0067	-0.03312	0.01048	0.00424	0.00457		7	-0.00265	0.00574
-83.5	-0.01816	-0.01125	-0.0232	-0.02885	0.00971	-0.00223	-0.0024		7	-0.01091	0.00511
-83	0.0034	-0.00118	0.00608	-0.03523	2e-05	-0.0034	-0.00367		7	-0.00486	0.00524
-82.5	-0.03047	-0.00603	0.01047	-0.03367	0.00838	0.00071	0.00077		7	-0.00712	0.00677
-82	0.00562	-0.00614	0.00876	-0.04005	0.01646	0.0061	0.00658		7	-0.00038	0.00707
-81.5	0.01318	-0.00499	0.0259	-0.02636	0.02013	0.00213	0.0023		7	0.00461	0.0066
-81	0.01299	-0.01232	0.03739	-0.04612	0.01067	0.00899	0.00969		7	0.00304	0.00984
-80.5	-0.00471	-0.00876	0.03251	-0.03599	0.00361	0.0101	0.01089		7	0.00109	0.00798
-80	0.01924	0.00136	0.01092	-0.02725	0.00669	-0.00882	-0.0095		7	-0.00105	0.00585
-79.5	0.00087	-0.00397	0.01779	-0.02944	-0.00243	0.006	0.00647		7	-0.00067	0.00552
-79	0.00945	0.01179	0.02361	-0.04121	0.003	0.00335	0.0036		7	0.00194	0.0077
-78.5	-0.00221	-0.01255	-0.00926	-0.02961	0.00461	-0.00232	-0.0025		7	-0.00769	0.00421
-78	0.00824	0.00463	0.0122	-0.03122	0.00894	0.00615	0.00662		7	0.00222	0.00565
-77.5	-0.00677	0.00217	-0.00539	-0.02735	0.00876	0.00933	0.01005		7	-0.00131	0.00507
-77	-0.00652	0.00955	0.01439	-0.04374	0.01341	0.00872	0.00939		7	0.00074	0.00786
-76.5	-0.01938	0.00541	0.03388	-0.04923	0.01417	0.00776	0.00837		7	0.00014	0.01013
-76	0.00345	0.00095	0.00012	-0.03181	0.01049	0.00572	0.00616		7	-0.0007	0.00535
-75.5	0.01188	0.00117	0.02756	-0.03603	0.01502	0.01117	0.01204		7	0.00611	0.00761
-75	0.00778	0.00877	0.0055	-0.03253	0.00992	0.00467	0.00503		7	0.00131	0.00569
-74.5	0.00364	0.00298	0.03011	-0.04955	0.01365	0.00861	0.00928		7	0.00267	0.00936
-74	0.00715	0.01506	0.02165	-0.03067	0.01039	0.00395	0.00426		7	0.00454	0.00633
-73.5	0.00412	3e-05	0.01204	-0.01038	0.01929	0.00913	0.00983		7	0.00629	0.0036
-73	0.00595	0.01406	0.0222	-0.03002	0.00743	0.01187	0.01279		7	0.00632	0.00637
-72.5	0.00095	0.0126	0.00427	0.00467	0.01359	0.00708	0.00763		7	0.00726	0.00172
-72	0.00711	-0.00642	0.01196	-0.01784	0.01656	0.01354	0.01459		7	0.00564	0.00488
-71.5	-0.00928	-0.00345	0.01373	-0.02354	0.01818	0.01388	0.01496		7	0.0035	0.00598
-71	-0.01989	-0.01258	0.02101	-0.01068	0.01445	0.00594	0.0064		7	0.00066	0.00576
-70.5	-0.0081	0.00708	0.02382	0.00718	0.00267	0.01473	0.01587		7	0.00904	0.0039
-70	-0.00819	-0.00622	0.03031	-0.01276	0.00339	0.0106	0.01142		7	0.00408	0.00562
-69.5	-0.00863	-0.00172	0.03871	-0.01619	0.01822	0.0189	0.02036		7	0.00995	0.00732
-69	0.00283	-2e-05	0.04098	0.00121	0.0159	0.01233	0.01329		7	0.01236	0.00535
-68.5	0.0078	0.00161	0.01794	-0.02321	0.0134	0.00833	0.00898		7	0.00498	0.00507
-68	-0.0147	0.00229	0.04728	0.00204	0.02235	0.01242	0.01339		7	0.01215	0.00734
-67.5	0.01007	0.01199	0.04484	0.00139	0.0405	0.00671	0.00723		7	0.01753	0.00662
-67	0.00161	0.00952	0.02424	0.00422	0.00366	0.00613	0.00661		7	0.008	0.00287
-66.5	0.0269	-0.00322	0.04874	1e-05	0.01822	0.01596	0.0172		7	0.01769	0.00655
-66	-0.00304	0.00237	0.04653	-0.00164	0.01977	0.02727	0.02939		7	0.01724	0.00707
-65.5	0.01124	0.01625	0.01682	0.00871	0.01291	0.02789	0.03005		7	0.0177	0.0031
-65	0.00201	0.0148	0.03147	-0.00136	0.01267	0.02371	0.02555		7	0.01555	0.00462
-64.5	0.01814	0.00877	0.01829	-0.01438	0.01971	0.01659	0.01788		7	0.01214	0.00463
-64	-0.00851	0.00342	0.01874	0.00108	0.01685	0.03767	0.04059		7	0.01569	0.00701
-63.5	-0.00483	0.0037	0.06602	0.01948	0.01834	0.01907	0.02055		7	0.02033	0.00846
-63	0.01965	0.01143	0.0454	0.01534	0.01672	0.02154	0.0232		7	0.0219	0.00419
-62.5	0.01646	0.01518	0.04967	0.01158	0.01422	0.02121	0.02285		7	0.0216	0.00491
-62	0.0191	0.01882	0.02634	0.02819	0.01504	0.03322	0.03579		7	0.02521	0.00296
-61.5	0.00515	0.00336	0.04568	0.02521	0.01986	0.0238	0.02564		7	0.02124	0.00539
-61	-0.00243	-0.01002	0.02293	0.03824	0.02816	0.03345	0.03604		7	0.02091	0.00731
-60.5	0.00285	0.01458	0.03601	0.03974	0.0219	0.03343	0.03602		7	0.02636	0.00518
-60	0.01407	0.00168	0.03768	0.03383	0.02253	0.03044	0.0328		7	0.02472	0.00487
-59.5	0.00423	0.00656	0.06133	0.04324	0.02499	0.0342	0.03685		7	0.0302	0.00765
-59	0.01678	0.00444	0.04754	0.04275	0.01475	0.02243	0.02417		7	0.02469	0.00583
-58.5	-0.01271	0.00419	0.04798	0.03141	0.02323	0.0395	0.04256		7	0.02517	0.00838
-58	0.01563	0.0161	0.02699	0.04088	0.01933	0.02598	0.02799		7	0.0247	0.00333
-57.5	-0.00573	0.00854	0.02753	0.01401	0.01632	0.03374	0.03635		7	0.01868	0.00566
-57	-0.00164	0.00201	0.03334	0.03293	0.02367	0.03898	0.042		7	0.02447	0.00665
-56.5	-0.00111	-0.00561	0.04527	0.03386	0.03327	0.02662	0.02869		7	0.023	0.00718
-56	0.00258	0.01507	0.06457	0.028	0.02273	0.02491	0.02684		7	0.02639	0.00719
-55.5	0.0025	0.00768	0.04084	0.03189	0.01845	0.03746	0.04037		7	0.0256	0.00605
-55	0.0067	0.0065	0.03392	0.03592	0.01982	0.02609	0.02811		7	0.02244	0.00454
-54.5	0.00876	0.01295	0.0561	0.02123	0.02977	0.02236	0.02409		7	0.02504	0.00582
-54	0.00137	0.00182	0.02306	0.02481	0.02362	0.03962	0.04269		7	0.02243	0.00614
-53.5	9e-05	0.00992	0.06591	0.03222	0.01436	0.03671	0.03956		7	0.0284	0.00839
-53	-0.00556	-0.00044	0.0527	0.04619	0.02131	0.03402	0.03665		7	0.02641	0.00847
-52.5	-0.0055	-0.00158	0.03701	0.03558	0.00885	0.03899	0.04201		7	0.02219	0.00784
-52	0.01125	0.00487	0.04934	0.01776	0.01594	0.0276	0.02974		7	0.02235	0.00557
-51.5	-0.00578	-0.00146	0.0621	0.03694	0.02597	0.02749	0.02962		7	0.02498	0.00872
-51	0.01872	0.01287	0.05244	-0.00176	0.01624	0.02694	0.02903		7	0.02207	0.00635
-50.5	-0.01004	0.01027	0.04862	0.02067	0.02297	0.04072	0.04387		7	0.0253	0.00791
-50	0.00034	0.01359	0.05125	0.00597	0.01062	0.02373	0.02557		7	0.01872	0.0064
-49.5	0.01006	0.00169	0.0196	0.03508	0.01011	0.0281	0.03027		7	0.01927	0.0047
-49	-0.00286	-0.00271	0.05167	0.01256	0.02447	0.03884	0.04185		7	0.0234	0.00826
-48.5	-0.00608	0.00508	0.05101	0.02192	0.016	0.0312	0.03362		7	0.02182	0.00719
-48	0.00841	0.00981	0.01925	0.03162	0.00568	0.03087	0.03326		7	0.01984	0.00456
-47.5	-0.00456	0.00516	0.02909	0.04174	0.01694	0.022	0.02371		7	0.01916	0.00578
-47	-0.02195	-0.00654	0.03424	0.05095	0.02272	0.0269	0.02899		7	0.01933	0.00946
-46.5	-0.00641	-0.0064	0.0465	0.03564	0.02315	0.03427	0.03692		7	0.02338	0.00811
-46	0.00104	0.01413	0.04548	0.01896	0.01586	0.0399	0.04299		7	0.02548	0.0065
-45.5	0.01062	-0.00021	0.03974	0.00703	0.02161	0.0365	0.03933		7	0.02209	0.00631
-45	-0.00289	0.00884	0.06868	0.00228	0.01031	0.02933	0.0316		7	0.02116	0.00931
-44.5	-0.00338	0.00041	0.0466	0.02115	0.02147	0.02009	0.02165		7	0.01828	0.00622
-44	-0.03699	0.00187	0.04993	0.01933	0.01872	0.02773	0.02988		7	0.01578	0.01036
-43.5	-0.00072	0.01566	0.05614	0.0265	0.02401	0.03064	0.03301		7	0.02646	0.00655
-43	-0.01819	-0.00663	0.01747	0.03809	0.0181	0.03659	0.03942		7	0.01784	0.00863
-42.5	0.00541	0.00812	0.06707	0.02103	0.02014	0.01905	0.02052		7	0.02305	0.00773
-42	-0.00082	-0.0001	0.07499	0.02168	0.02073	0.02526	0.02722		7	0.02413	0.00954
-41.5	-0.02894	-0.01027	0.04125	0.04355	0.01854	0.0261	0.02812		7	0.0169	0.01018
-41	-0.01108	-0.00025	0.00334	0.02509	0.00754	0.02424	0.02612		7	0.01072	0.00554
-40.5	-0.01463	0.00466	0.04814	0.01317	0.00563	0.02623	0.02826		7	0.01592	0.00767
-40	-0.01017	0.00974	0.03229	0.03899	0.00735	0.0297	0.03201		7	0.01999	0.00677
-39.5	-0.02642	-0.00189	0.03944	0.01548	0.01111	0.0348	0.0375		7	0.01572	0.00914
-39	-0.0093	-0.00161	0.04846	0.04394	0.01174	0.03886	0.04187		7	0.02485	0.00906
-38.5	-0.01397	0.00693	0.02687	0.04216	0.00828	0.02071	0.02231		7	0.01619	0.00673
-38	-0.00775	-0.00898	0.02944	0.02808	0.01714	0.03091	0.0333		7	0.01745	0.00694
-37.5	-0.01104	-0.00458	0.04599	0.02798	0.01818	0.03654	0.03937		7	0.02178	0.00836
-37	-0.01354	0.00433	0.0581	0.01243	0.02007	0.02965	0.03195		7	0.02043	0.00861
-36.5	-0.00963	0.00299	0.04279	0.02407	0.00945	0.02373	0.02556		7	0.01699	0.00654
-36	-0.0169	-0.00719	0.00646	0.04128	0.01401	0.02463	0.02654		7	0.01269	0.00766
-35.5	-0.01254	0.00171	0.04014	0.02271	0.01076	0.02472	0.02663		7	0.0163	0.00666
-35	-0.01864	-0.00514	0.05696	0.02308	0.01533	0.0332	0.03577		7	0.02008	0.00969
-34.5	-0.0023	0.02172	0.02668	0.01397	0.01122	0.02784	0.03		7	0.01845	0.00437
-34	-0.00603	0.00104	0.04797	0.00758	0.01301	0.0235	0.02532		7	0.01606	0.00682
-33.5	-0.00805	-0.00468	0.05985	0.02533	0.0035	0.02095	0.02258		7	0.01707	0.00877
-33	-0.01055	0.00699	0.0318	0.03402	0.00811	0.01685	0.01815		7	0.01505	0.00582
-32.5	-0.00027	-0.00703	0.07526	0.03651	0.00514	0.02829	0.03048		7	0.02405	0.01064
-32	0.00923	0.00096	0.03151	0.03062	0.01734	0.02282	0.02459		7	0.01958	0.00425
-31.5	-0.00448	-0.0085	0.04035	0.02039	0.01109	0.01971	0.02124		7	0.01426	0.00632
-31	-0.02297	0.00875	0.06492	0.01871	0.00974	0.03146	0.0339		7	0.02064	0.01026
-30.5	-0.01755	0.00239	0.04401	0.00916	0.01924	0.0307	0.03308		7	0.01729	0.00794
-30	-0.01026	-0.01268	0.06136	0.01265	0.00954	0.03123	0.03365		7	0.01793	0.00993
-29.5	-0.007	-0.00836	0.04342	0.02673	0.0017	0.02487	0.0268		7	0.01545	0.00754
-29	-0.00916	0.00084	0.05197	0.01147	-0.00096	0.02327	0.02508		7	0.01464	0.00785
-28.5	-0.00143	0.00289	0.04114	0.02824	0.01316	0.02446	0.02635		7	0.01926	0.00571
-28	0.00541	0.0056	0.03905	0.01341	0.00807	0.0156	0.01681		7	0.01485	0.0044
-27.5	-0.01305	-0.00082	0.03308	0.03197	0.02488	0.01722	0.01855		7	0.01597	0.00647
-27	0.00021	-0.01447	0.04224	0.02747	0.01737	0.0279	0.03006		7	0.01868	0.00738
-26.5	0.00927	-0.00262	0.02849	0.02109	0.01277	0.022	0.0237		7	0.01639	0.00402
-26	0.00035	-0.00764	0.04426	0.03413	0.00146	0.02399	0.02585		7	0.01748	0.00738
-25.5	-0.01265	-0.00587	0.05568	0.00611	0.00865	0.01375	0.01481		7	0.0115	0.00829
-25	0.0095	-0.01296	0.07137	0.00542	0.00176	0.0143	0.01541		7	0.01497	0.01007
-24.5	0.00247	-0.00113	0.06206	0.00764	0.01043	0.02244	0.02418		7	0.0183	0.00812
-24	0.01619	-0.00901	-0.00315	0.01609	0.00119	0.02674	0.02881		7	0.01098	0.00559
-23.5	-0.00095	-0.00719	0.05079	0.01916	0.00193	0.01832	0.01974		7	0.01454	0.00732
-23	-0.00815	-0.01897	0.01864	0.02473	0.0016	0.01695	0.01827		7	0.00758	0.00618
-22.5	0.00508	0.00887	0.03493	0.01662	0.00834	0.01023	0.01103		7	0.01358	0.00379
-22	-0.00747	-0.00732	0.05933	0.01584	0.01059	0.01455	0.01568		7	0.01446	0.00843
-21.5	0.00673	-0.00711	0.0761	0.03002	-0.00591	0.01461	0.01574		7	0.0186	0.01076
-21	-0.00859	-0.00316	0.07815	0.00902	0.00824	0.02247	0.02422		7	0.01862	0.01092
-20.5	0.01368	-0.01043	0.03648	0.02704	-0.00058	0.01717	0.01851		7	0.01455	0.006
-20
-19.5
-19
-18.5
-18
-17.5
-17
-16.5
-16
-15.5
-15
-14.5
-14
-13.5
-13
-12.5
-12
-11.5
-11
-10.5
-10
-9.5
-9
-8.5
-8
-7.5
-7
-6.5
-6
-5.5
-5
-4.5
-4
-3.5
-3
-2.5
-2
-1.5
-1
-0.5
0	0.01511	0.00027	0.00717	0.00219	-0.00216	-0.00348	-0.00272		7	0.00234	0.00254
0.5	0.01753	-0.01748	0.00739	-0.02238	-0.00244	-0.0058	-0.01424		7	-0.00535	0.00537
1	0.02922	-0.01473	-0.01422	-0.00911	-0.00074	-0.01032	-0.00725		7	-0.00388	0.00579
1.5	0.02802	0.0039	0.00068	-0.00043	-0.00348	-0.00875	-0.00717		7	0.00183	0.00467
2	0.02797	-0.00911	-0.00741	-0.01933	0.00619	-0.00421	-0.01338		7	-0.00276	0.00593
2.5	0.01369	-0.00389	-0.01127	-0.02472	-0.00337	-0.00369	-0.01331		7	-0.00665	0.00445
3	0.02886	0.00564	0.00038	-0.00937	-0.00866	-0.00033	-0.00169		7	0.00212	0.00488
3.5	0.00899	-0.00467	-0.02098	-0.01547	0.00917	0.00592	0.00557		7	-0.00164	0.00466
4	0.02027	-0.00884	-0.00899	-0.01134	0.00503	-0.00284	0.01137		7	0.00066	0.00452
4.5	0.02667	-0.01505	-0.01289	0.00145	0.01073	-0.01511	-0.00951		7	-0.00196	0.006
5	0.02388	-0.00144	0.00551	-0.01533	-0.00747	-0.00349	-0.00606		7	-0.00063	0.00473
5.5	0.02637	-0.01073	-0.0074	-0.01246	-0.0104	-0.00987	-0.00631		7	-0.0044	0.00519
6	0.039	-0.01471	0.00414	-0.00264	-0.00582	-0.01015	-0.00579		7	0.00058	0.00678
6.5	0.02074	-0.01083	-0.03855	-0.00474	-0.0028	-0.0093	-0.00689		7	-0.00748	0.00656
7	0.0287	-0.02188	-0.00067	-0.0121	0.00253	-0.00566	0.006		7	-0.00044	0.00602
7.5	0.01039	-0.01129	-0.03031	0.01657	-0.00219	-0.00765	0.00196		7	-0.00322	0.00582
8	0.0064	0.00184	0.00051	-0.00435	-0.0088	-0.00637	-0.009		7	-0.00283	0.00222
8.5	0.01502	-0.00787	0.00659	-0.0093	-0.00349	-0.00177	-0.01767		7	-0.00264	0.00407
9	0.02083	-0.0104	-0.0105	-0.01285	0.00089	-0.00621	-0.00254		7	-0.00297	0.00437
9.5	0.01413	-0.01545	0.00626	0.00518	-0.00704	-0.01334	-0.01122		7	-0.00307	0.00434
10	0.03805	-0.01576	0.00398	-0.00085	-0.00271	-0.00427	-0.00464		7	0.00197	0.00642
10.5	0.00651	-0.01311	-0.00358	-0.0225	-0.00353	-0.00407	-0.00419		7	-0.00635	0.00344
11	0.02259	-0.0036	0.01303	-0.007	-0.00043	-0.00099	0.0022		7	0.00368	0.00394
11.5	0.01271	-0.00233	0.00837	-0.00784	-0.00428	0.00066	-0.00116		7	0.00088	0.00273
12	0.03822	0.00427	-0.03064	-0.00141	-0.00195	0.0111	-0.00224		7	0.00248	0.00773
12.5	0.03221	-0.01134	-0.00415	-0.00664	0.00337	0.0071	-0.00852		7	0.00172	0.00565
13	0.0397	-0.01375	0.00939	-0.00995	0.00132	0.00586	0.0156		7	0.00688	0.00673
13.5	0.04017	-0.00841	0.01432	0.00838	-0.00055	0.01317	0.00524		7	0.01033	0.0058
14	0.00438	-0.00164	0.02724	0.00987	0.00548	0.01558	-0.01353		7	0.00677	0.00487
14.5	0.02915	-0.01557	0.02537	-0.00224	0.01196	0.01046	-0.01527		7	0.00627	0.00682
15	0.013	0.00097	0.02632	0.00126	-0.00233	0.0189	-0.00143		7	0.0081	0.00428
15.5	0.01642	0.00941	0.02719	0.02071	-0.00039	0.01617	0.01298		7	0.01464	0.00329
16	0.02524	0.00728	0.02713	0.01608	0.00394	0.0158	0.00748		7	0.01471	0.00342
16.5	0.01772	0.01162	0.04709	0.03477	0.00915	0.01513	0.00279		7	0.01975	0.00591
17	0.03172	-0.00169	0.02885	0.03643	0.00473	0.01447	0.01401		7	0.01836	0.00543
17.5	0.01676	0.001	0.02966	0.02837	0.0117	0.02018	0.01548		7	0.01759	0.00373
18	0.01939	0.01809	0.02358	0.01866	0.00101	0.0269	0.00867		7	0.01661	0.00336
18.5	0.02829	0.00202	0.02699	0.04137	0.00811	0.02382	0.02405		7	0.02209	0.00497
19	0.02834	0.01756	0.06375	0.0126	0.01512	0.0308	0.01623		7	0.02634	0.00676
19.5	0.02471	0.00401	0.03499	0.0523	0.00829	0.01985	0.03039		7	0.02494	0.00621
20	0.01205	0.00515	0.05928	0.05505	0.00109	0.02714	0.02087		7	0.0258	0.00877
20.5	0.02129	0.01827	0.05343	0.04091	0.00247	0.03118	0.00473		7	0.02461	0.00703
21	0.02211	0.01104	0.041	0.0503	0.00991	0.03076	0.00775		7	0.0247	0.00628
21.5	0.0256	0.016	0.04891	0.03584	0.00825	0.04096	0.0275		7	0.02901	0.00534
22	0.02201	0.02386	0.0736	0.05385	0.01446	0.02681	0.03573		7	0.03576	0.0079
22.5	0.02178	0.01094	0.06609	0.06676	0.01873	0.03052	0.02556		7	0.03434	0.00859
23	0.03688	0.01947	0.02459	0.0465	0.0152	0.02773	0.04447		7	0.03069	0.0046
23.5	0.02792	0.01742	0.08565	0.07617	0.01439	0.0306	0.04102		7	0.04188	0.01066
24	0.03473	0.00967	0.04114	0.07799	0.0088	0.0442	0.05021		7	0.03811	0.00908
24.5	0.0325	0.02095	0.0756	0.08	0.00994	0.04437	0.04854		7	0.04456	0.00992
25	0.02531	0.02382	0.05651	0.06835	0.01526	0.04465	0.04142		7	0.03933	0.00722
25.5	0.03618	0.01994	0.05686	0.06021	0.02116	0.055	0.04971		7	0.04272	0.00642
26	0.05087	0.01582	0.04598	0.07013	0.02195	0.04442	0.02669		7	0.03941	0.00718
26.5	0.04875	0.01663	0.04642	0.06698	0.01379	0.03748	0.045		7	0.03929	0.00708
27	0.01955	0.01661	0.09795	0.08002	0.01885	0.05477	0.04561		7	0.04762	0.01216
27.5	0.02536	0.02284	0.06411	0.09608	0.02554	0.04746	0.02596		7	0.04391	0.01045
28	0.03732	0.0419	0.07182	0.07718	0.01826	0.05784	0.03132		7	0.04795	0.00821
28.5	0.03705	0.02053	0.06479	0.0746	0.01897	0.05218	0.05037		7	0.0455	0.008
29	0.02621	0.03017	0.10047	0.09674	0.02866	0.06031	0.05999		7	0.05751	0.01191
29.5	0.03325	0.03182	0.05135	0.08473	0.02771	0.06022	0.04146		7	0.04722	0.00762
30	0.02942	0.03323	0.06669	0.09122	0.01614	0.05971	0.05441		7	0.05012	0.00969
30.5	0.04093	0.02769	0.06767	0.09451	0.0209	0.05331	0.03762		7	0.04895	0.00961
31	0.04548	0.02898	0.07165	0.09781	0.02989	0.04479	0.03852		7	0.05102	0.00948
31.5	0.04741	0.04021	0.09747	0.1006	0.03502	0.05508	0.05823		7	0.062	0.01003
32	0.0234	0.04982	0.06722	0.07646	0.0196	0.05413	0.04392		7	0.04779	0.00794
32.5	0.02882	0.01791	0.10081	0.08795	0.01667	0.05184	0.03765		7	0.04881	0.01268
33	0.02389	0.05496	0.07002	0.10274	0.01336	0.05441	0.05707		7	0.05378	0.01113
33.5	0.05982	0.04891	0.10257	0.11303	0.0312	0.05144	0.03264		7	0.0628	0.01229
34	0.05636	0.03158	0.09619	0.09796	0.02402	0.06437	0.0557		7	0.06088	0.0108
34.5	0.06033	0.03094	0.08577	0.1147	0.01526	0.06321	0.06417		7	0.06205	0.01244
35	0.03184	0.03821	0.09483	0.11482	0.01753	0.05652	0.04667		7	0.0572	0.0133
35.5	0.04854	0.02543	0.08975	0.09615	0.02714	0.05688	0.04871		7	0.05608	0.0105
36	0.05547	0.02919	0.08376	0.09276	0.01868	0.05518	0.03876		7	0.0534	0.01033
36.5	0.04351	0.02118	0.09547	0.08738	0.009	0.0563	0.0344		7	0.04961	0.01225
37	0.0382	0.04904	0.05977	0.07814	0.02624	0.04714	0.04903		7	0.04965	0.00617
37.5	0.03458	0.03492	0.07666	0.09948	0.0089	0.05111	0.05278		7	0.0512	0.01125
38	0.06628	0.03136	0.06075	0.09339	0.01211	0.04485	0.04898		7	0.0511	0.00984
38.5	0.03629	0.04161	0.0737	0.08474	0.02487	0.0428	0.05578		7	0.0514	0.00806
39	0.04662	0.04071	0.12104	0.06498	0.01522	0.04907	0.05099		7	0.05552	0.01231
39.5	0.03835	0.04215	0.06297	0.10726	0.01705	0.05215	0.05134		7	0.05304	0.01055
40	0.04627	0.04238	0.05734	0.09269	0.01823	0.06279	0.05689		7	0.0538	0.00855
40.5	0.03093	0.04107	0.08928	0.08462	0.01472	0.06214	0.06079		7	0.05479	0.01039
41	0.05217	0.04544	0.07272	0.09169	0.02096	0.04927	0.05184		7	0.05487	0.0084
41.5	0.04337	0.04914	0.07834	0.08271	0.01606	0.05418	0.04228		7	0.0523	0.0086
42	0.02239	0.0532	0.0541	0.07829	0.02556	0.05697	0.04377		7	0.04775	0.0073
42.5	0.03184	0.05467	0.10657	0.10359	0.01996	0.06275	0.06322		7	0.06323	0.01238
43	0.02911	0.04996	0.07374	0.10457	0.01989	0.05242	0.04888		7	0.05408	0.01066
43.5	0.05488	0.04088	0.08098	0.0914	0.02454	0.05623	0.05994		7	0.05841	0.00855
44	0.03828	0.04714	0.06836	0.07124	0.02297	0.05177	0.05725		7	0.051	0.00639
44.5	0.04422	0.04626	0.11092	0.09838	0.02475	0.05143	0.0452		7	0.06017	0.01199
45	0.03297	0.05469	0.09009	0.11228	0.01896	0.06057	0.04951		7	0.05987	0.01214
45.5	0.04342	0.04303	0.09477	0.08613	0.0209	0.04298	0.04943		7	0.05438	0.00996
46	0.03817	0.0486	0.08481	0.10627	0.01468	0.05336	0.05364		7	0.05707	0.01138
46.5	0.04573	0.04021	0.07834	0.0819	0.02712	0.06171	0.06065		7	0.05652	0.00758
47	0.04233	0.05761	0.06494	0.09559	0.02086	0.05934	0.04277		7	0.05478	0.00879
47.5	0.02044	0.05001	0.1024	0.10282	0.02196	0.05691	0.05263		7	0.05817	0.01271
48	0.03369	0.02633	0.08909	0.08992	0.01098	0.05088	0.0475		7	0.04977	0.01142
48.5	0.0482	0.0603	0.10045	0.08837	0.02836	0.0483	0.04923		7	0.06046	0.00955
49	0.02525	0.05245	0.08558	0.08143	0.02613	0.05761	0.06		7	0.05549	0.00898
49.5	0.03545	0.04794	0.10175	0.10372	0.02072	0.05991	0.04674		7	0.05946	0.01207
50	0.03658	0.05365	0.06349	0.11118	0.03699	0.05776	0.05525		7	0.05927	0.00948
50.5	0.03477	0.0335	0.08612	0.09602	0.02258	0.06161	0.0586		7	0.05617	0.01049
51	0.05672	0.05588	0.0958	0.10112	0.02429	0.0663	0.04068		7	0.06297	0.0105
51.5	0.04772	0.06248	0.06538	0.08087	0.02329	0.06724	0.05049		7	0.05678	0.00697
52	0.05074	0.04327	0.07516	0.07486	0.02611	0.05567	0.05808		7	0.05484	0.00655
52.5	0.0406	0.05762	0.06138	0.08992	0.02897	0.06047	0.06228		7	0.05732	0.00723
53	0.04533	0.06225	0.07915	0.09743	0.02301	0.06012	0.04593		7	0.05903	0.00919
53.5	0.02283	0.03619	0.09822	0.08125	0.02505	0.05827	0.06814		7	0.05571	0.01094
54	0.05744	0.0523	0.06419	0.07545	0.02488	0.04739	0.06401		7	0.05509	0.0061
54.5	0.01409	0.05155	0.0665	0.07836	0.02807	0.05601	0.06549		7	0.05144	0.00861
55	0.04728	0.05452	0.06767	0.08973	0.02447	0.05467	0.05366		7	0.056	0.00749
55.5	0.05089	0.07062	0.10074	0.06206	0.01797	0.05332	0.04527		7	0.05727	0.00956
56	0.05611	0.05459	0.10553	0.06479	0.02407	0.06046	0.05561		7	0.06016	0.00906
56.5	0.03944	0.05154	0.08439	0.07765	0.02711	0.06319	0.06364		7	0.05813	0.00769
57	0.04844	0.0498	0.07171	0.07042	0.03107	0.06666	0.05004		7	0.05545	0.0056
57.5	0.0317	0.04563	0.07472	0.06918	0.02651	0.0661	0.04506		7	0.05127	0.00717
58	0.0502	0.05722	0.07396	0.0758	0.02119	0.06558	0.05635		7	0.05719	0.00698
58.5	0.05395	0.06037	0.08802	0.08612	0.01976	0.06326	0.05046		7	0.06028	0.00876
59	0.05972	0.03754	0.08594	0.09099	0.03215	0.05176	0.03868		7	0.05668	0.00894
59.5	0.03532	0.06385	0.06646	0.0826	0.02014	0.0531	0.0638		7	0.05504	0.00795
60	0.03891	0.06419	0.0697	0.0804	0.03065	0.06608	0.04409		7	0.05629	0.00695
60.5	0.04379	0.06446	0.10603	0.08777	0.03464	0.05607	0.05633		7	0.06416	0.00942
61	0.02596	0.06616	0.07074	0.09731	0.01398	0.0557	0.0448		7	0.05352	0.01067
61.5	0.02791	0.05517	0.05958	0.05768	0.03165	0.06097	0.06469		7	0.05109	0.00563
62	0.03404	0.06444	0.10994	0.0746	0.02976	0.05896	0.0441		7	0.0594	0.01043
62.5	0.04085	0.06616	0.06499	0.0752	0.03622	0.05512	0.0484		7	0.05528	0.00541
63	0.0488	0.05678	0.08733	0.08059	0.0234	0.06069	0.03503		7	0.05609	0.00868
63.5	0.03407	0.06799	0.11096	0.10458	0.02807	0.07173	0.04848		7	0.06655	0.01226
64	0.03701	0.06046	0.05452	0.08331	0.03143	0.05482	0.03451		7	0.05087	0.00692
64.5	0.03815	0.07147	0.08086	0.06858	0.02336	0.0586	0.04887		7	0.0557	0.00765
65	0.03469	0.06958	0.06051	0.05038	0.02286	0.06828	0.04145		7	0.04968	0.00668
65.5	0.03475	0.07348	0.05311	0.08958	0.02397	0.05966	0.04611		7	0.05438	0.00847
66	0.02963	0.07648	0.10842	0.04685	0.03315	0.06412	0.0354		7	0.05629	0.01087
66.5	0.05509	0.07891	0.08287	0.09209	0.02013	0.06086	0.05328		7	0.06332	0.00912
[truncated: 1,370 more rows]

## Sheet: 8B
Data related to Figure 8B: synapto-pHluorin fluorescence changes upon the application of ionomycin followed by the NH4Cl application in the presence or absence of AM251
rerative DF	control
sec	Exp #1	#2	#3	#4	#5	#6	#7	#8	#9	#10		N	Average	SEM
-10	0.0028	0.00518	0.01562	0.01526	0.01338	0.01033	0.01137	0.00867	0.01469	0.00177		10	0.00991	0.00163
-9.5	0.00336	0.00652	-8e-05	0.02252	0.00449	0.00374	0.01291	0.00492	0.01416	0.00585		10	0.00784	0.00212
-9	0.00196	-0.0025	0.0098	0.02413	0.00967	0.00577	0.00745	0.00617	0.00906	0.0014		10	0.00729	0.00226
-8.5	7e-05	-0.00108	0.00986	0.01592	-0.00083	0.01739	0.00868	0.01204	0.02708	0.00779		10	0.00969	0.00285
-8	-0.00399	-0.00193	0.02432	0.02967	0.00506	0.01834	0.01299	0.00717	0.01134	-0.00027		10	0.01027	0.00357
-7.5	5e-05	-0.0059	0.03085	0.0124	0.01871	0.00947	0.00979	0.00764	0.01306	0.0011		10	0.00972	0.00327
-7	-0.00135	-0.00364	0.01699	0.00816	0.0117	0.00422	0.01032	0.004	0.01583	0.00371		10	0.00699	0.00217
-6.5	-0.00055	0.00101	0.01322	0.01417	0.00703	0.01079	0.01172	0.00446	0.00897	-0.0006		10	0.00702	0.00179
-6	-0.0014	0.00358	0.00726	0.00802	0.01382	0.00336	0.01364	0.00645	0.00278	-0.00699		10	0.00505	0.00201
-5.5	-0.00128	-0.00121	0.00894	-0.01051	0.01091	0.0096	0.00545	0.00075	0.00581	-0.00137		10	0.00271	0.0021
-5	0.00026	-0.00266	0.01125	0.01162	0.00997	0.00402	0.00681	-0.00098	0.00871	-0.0046		10	0.00444	0.00192
-4.5	-0.00074	0.00299	0.00849	0.01051	0.00311	0.00603	0.00061	-0.00285	0.00762	-0.0028		10	0.0033	0.0015
-4	0.00226	0.0024	0.00131	0.0139	0.00525	0.00028	0.00901	0.00098	0.01113	-0.00023		10	0.00463	0.00158
-3.5	-0.00026	0.00236	0.01749	0.01412	0.0015	0.01125	0.00419	0.00466	0.01126	-0.00729		10	0.00593	0.00237
-3	-0.00143	0.00163	0.00636	0.00378	0.00821	0.00665	0.00103	0.0034	0.0113	-0.0078		10	0.00331	0.00171
-2.5	-0.00354	-0.00045	0.01736	-0.01112	0.00494	-0.00306	0.00286	0.00391	0.00508	-0.00085		10	0.00151	0.00235
-2	0.00247	0.00106	-0.0083	-0.00941	-0.00515	-0.00041	0.00111	0.007	0.00638	0.00836		10	0.00031	0.00198
-1.5	0.00059	0.00256	-0.00562	0.01255	-0.00085	0.00547	-0.0025	-0.00308	-0.00897	-0.00818		10	-0.0008	0.00206
-1	0.00048	-0.00317	-0.00344	0.00797	0.00107	-0.00201	-0.00147	-0.00782	-0.00249	0.00067		10	-0.00102	0.00129
-0.5	-0.00129	0.00166	0.01289	-0.00362	0.00657	0.00121	-0.00138	0.00322	0.00659	-0.01175		10	0.00141	0.00211
0
0.5
1
1.5
2
2.5
3	-0.0908	-0.08626	-0.07633	0.05942	0.08324	0.03566	-0.07493	0.0185	0.01233	0.00432		10	-0.01149	0.02056
3.5	-0.08633	-0.09503	-0.03842	0.1626	0.18501	0.09385	-0.02855	0.13322	0.09236	0.02637		10	0.04451	0.03256
4	-0.07035	-0.09177	-0.00973	0.26069	0.25234	0.15596	0.03956	0.22625	0.15504	0.0609		10	0.09789	0.04138
4.5	-0.04101	-0.09975	-0.01016	0.31882	0.31506	0.21412	0.13501	0.29809	0.208	0.09178		10	0.143	0.04862
5	0.00583	-0.09768	-0.0232	0.34011	0.33743	0.28382	0.19621	0.33242	0.24134	0.11222		10	0.17285	0.05178
5.5	0.0739	-0.10082	-0.00557	0.35667	0.36358	0.32021	0.26043	0.35023	0.27746	0.13896		10	0.2035	0.05273
6	0.12752	-0.10166	0.00062	0.3919	0.39746	0.35848	0.30292	0.38474	0.31225	0.17811		10	0.23524	0.05601
6.5	0.17072	-0.09624	0.00992	0.40429	0.41713	0.38295	0.32798	0.39696	0.32739	0.20164		10	0.25427	0.05667
7	0.20519	-0.09378	0.01863	0.40224	0.42628	0.4002	0.35765	0.4119	0.35705	0.22239		10	0.27077	0.05737
7.5	0.23192	-0.07584	0.00357	0.42927	0.44309	0.41951	0.37005	0.42247	0.37759	0.26002		10	0.28816	0.05882
8	0.25919	-0.05086	0.00879	0.41441	0.44323	0.42452	0.3778	0.43318	0.39932	0.25938		10	0.2969	0.05714
8.5	0.28252	-0.02718	0.02643	0.42217	0.44156	0.44398	0.39584	0.43504	0.40092	0.27888		10	0.31001	0.05527
9	0.30681	0.01299	0.00921	0.42791	0.45203	0.44262	0.40463	0.4505	0.4236	0.29826		10	0.32286	0.05482
9.5	0.32832	0.03556	0.028	0.45313	0.46736	0.45779	0.41617	0.44803	0.42886	0.31705		10	0.33803	0.05364
10	0.34572	0.05455	0.04113	0.46939	0.4674	0.46746	0.42915	0.45343	0.43696	0.3438		10	0.3509	0.05261
10.5	0.36177	0.07781	0.04845	0.46403	0.48051	0.46637	0.42761	0.46707	0.45308	0.37088		10	0.36176	0.05144
11	0.38138	0.097	0.03415	0.46308	0.49642	0.48068	0.44233	0.47393	0.44706	0.38431		10	0.37003	0.05234
11.5	0.38962	0.12516	0.02539	0.4619	0.47732	0.46855	0.43335	0.46498	0.4623	0.41307		10	0.37216	0.05079
12	0.3933	0.13643	0.04669	0.46902	0.49354	0.49306	0.44958	0.47625	0.46239	0.41341		10	0.38337	0.05012
12.5	0.40504	0.16409	0.02508	0.47342	0.48649	0.48335	0.45098	0.47654	0.45293	0.41963		10	0.38375	0.05001
13	0.40864	0.18701	0.04934	0.47352	0.48695	0.48546	0.46738	0.48814	0.47117	0.44048		10	0.39581	0.04802
13.5	0.41252	0.19003	0.05986	0.48775	0.49107	0.49849	0.45753	0.48382	0.49225	0.44268		10	0.4016	0.04787
14	0.42008	0.19483	0.06478	0.49456	0.49618	0.49136	0.46318	0.48786	0.47554	0.45778		10	0.40461	0.04737
14.5	0.42255	0.21182	0.06189	0.48507	0.49686	0.50144	0.46853	0.49524	0.48254	0.46436		10	0.40903	0.04726
15	0.42172	0.2075	0.06479	0.48561	0.50055	0.50118	0.48582	0.49649	0.49398	0.46883		10	0.41265	0.04787
15.5	0.42735	0.21565	0.05533	0.50409	0.50761	0.50879	0.47801	0.49201	0.50851	0.46701		10	0.41644	0.04898
16	0.43556	0.21845	0.06045	0.48554	0.50831	0.50915	0.47187	0.50248	0.48876	0.46099		10	0.41416	0.04781
16.5	0.43559	0.22647	0.06415	0.50218	0.50943	0.52032	0.49707	0.51555	0.50892	0.48257		10	0.42622	0.04895
17	0.4403	0.23665	0.04633	0.501	0.51337	0.5077	0.48812	0.51009	0.50712	0.48424		10	0.42349	0.04955
17.5	0.4408	0.23948	0.06441	0.48415	0.52295	0.52374	0.49807	0.51916	0.50876	0.49435		10	0.42959	0.04869
18	0.43139	0.24849	0.04399	0.49281	0.51065	0.51581	0.48535	0.51202	0.51254	0.49151		10	0.42446	0.04942
18.5	0.44229	0.24555	0.06626	0.51315	0.52709	0.52272	0.49808	0.51901	0.51073	0.48582		10	0.43307	0.04871
19	0.44362	0.25495	0.06552	0.49521	0.51918	0.53535	0.49363	0.52287	0.52238	0.4922		10	0.43449	0.04852
19.5	0.44718	0.26144	0.08072	0.50148	0.51691	0.53236	0.50179	0.52231	0.5189	0.50335		10	0.43865	0.04715
20	0.45024	0.2809	0.08932	0.51298	0.52488	0.53547	0.49916	0.52517	0.53288	0.49234		10	0.44434	0.04618
20.5	0.44807	0.28464	0.09799	0.50746	0.51876	0.53685	0.50681	0.5275	0.52761	0.5002		10	0.44559	0.04527
21	0.44515	0.30239	0.10755	0.51751	0.5291	0.54048	0.50421	0.53552	0.52825	0.50108		10	0.45112	0.04435
21.5	0.44534	0.31174	0.09634	0.52929	0.52262	0.53824	0.52093	0.53782	0.51891	0.50356		10	0.45248	0.0452
22	0.44546	0.31895	0.10014	0.52519	0.53522	0.55262	0.50705	0.54224	0.53204	0.50693		10	0.45658	0.04526
22.5	0.44895	0.34243	0.10852	0.52504	0.52951	0.54179	0.50782	0.53927	0.53303	0.51783		10	0.45942	0.04352
23	0.44769	0.36219	0.13251	0.51447	0.52717	0.53477	0.50912	0.53513	0.53989	0.52171		10	0.46246	0.04058
23.5	0.44888	0.38163	0.13902	0.5275	0.53804	0.54535	0.51294	0.54354	0.5323	0.51312		10	0.46823	0.04005
24	0.44973	0.39035	0.16606	0.53518	0.53081	0.55079	0.5144	0.54146	0.54752	0.50601		10	0.47323	0.0377
24.5	0.44667	0.403	0.1709	0.51606	0.5313	0.54407	0.51605	0.55392	0.55024	0.51094		10	0.47431	0.03696
25	0.4574	0.40502	0.17244	0.51455	0.53247	0.55226	0.51312	0.53754	0.53611	0.50679		10	0.47277	0.03616
25.5	0.45171	0.43037	0.16687	0.52518	0.53212	0.53651	0.51995	0.54405	0.54388	0.52512		10	0.47757	0.03667
26	0.44845	0.43537	0.16364	0.51856	0.53272	0.54386	0.51702	0.54764	0.55976	0.52169		10	0.47887	0.03733
26.5	0.44742	0.448	0.18616	0.53693	0.54143	0.53902	0.52029	0.54306	0.56854	0.5193		10	0.48501	0.03554
27	0.45144	0.45542	0.17425	0.54497	0.54636	0.55932	0.51341	0.54184	0.5436	0.52342		10	0.4854	0.03658
27.5	0.45203	0.45872	0.18786	0.54158	0.54754	0.54637	0.52637	0.55394	0.55844	0.51947		10	0.48923	0.03556
28	0.45308	0.45275	0.19304	0.5366	0.53091	0.56012	0.5311	0.55083	0.55839	0.52151		10	0.48883	0.03508
28.5	0.45608	0.46656	0.2082	0.53625	0.53209	0.56034	0.52274	0.54681	0.5713	0.51753		10	0.49179	0.0336
29	0.46074	0.45964	0.20295	0.54449	0.53337	0.56112	0.51897	0.55749	0.55118	0.53482		10	0.49248	0.03418
29.5	0.45693	0.46699	0.20743	0.53199	0.54525	0.55486	0.52333	0.55161	0.5729	0.5161		10	0.49274	0.03381
30	0.4606	0.46988	0.22016	0.54641	0.53257	0.55788	0.525	0.55332	0.58016	0.53018		10	0.49762	0.03301
30.5	0.45921	0.47929	0.2174	0.53477	0.54582	0.56715	0.53169	0.56228	0.56363	0.53212		10	0.49934	0.03329
31	0.46792	0.47668	0.2099	0.55771	0.5494	0.56002	0.52861	0.56223	0.57721	0.52943		10	0.50191	0.03441
31.5	0.46375	0.47733	0.2303	0.54357	0.54686	0.55465	0.53132	0.55224	0.5637	0.53656		10	0.50003	0.03175
32	0.46922	0.48102	0.24077	0.53148	0.54825	0.55944	0.52456	0.5579	0.58136	0.5317		10	0.50257	0.03107
32.5	0.47083	0.48302	0.24753	0.54268	0.54558	0.5777	0.53173	0.56196	0.5553	0.53595		10	0.50523	0.0305
33	0.47429	0.49605	0.24725	0.56683	0.55937	0.57035	0.54137	0.56679	0.56754	0.53691		10	0.51268	0.03127
33.5	0.48225	0.49686	0.25068	0.54471	0.55548	0.56701	0.54226	0.56405	0.57449	0.52935		10	0.51071	0.03041
34	0.48399	0.48994	0.24319	0.55386	0.55575	0.56103	0.53902	0.56249	0.57195	0.53817		10	0.50994	0.03111
34.5	0.4865	0.49018	0.25099	0.55589	0.5491	0.56464	0.52886	0.56272	0.56343	0.54274		10	0.50951	0.03013
35	0.47832	0.49588	0.26924	0.55496	0.54163	0.56769	0.52905	0.56836	0.57154	0.52997		10	0.51066	0.02857
35.5	0.48404	0.49647	0.24677	0.55763	0.54951	0.56617	0.52849	0.55903	0.57727	0.53539		10	0.51008	0.03074
36	0.48629	0.4956	0.26833	0.54986	0.55367	0.56545	0.53162	0.56752	0.57901	0.54655		10	0.51439	0.02895
36.5	0.48321	0.49098	0.27866	0.56532	0.5557	0.57453	0.53322	0.56337	0.5781	0.53555		10	0.51587	0.02833
37	0.48626	0.50131	0.29983	0.53495	0.54856	0.57626	0.5279	0.57304	0.58894	0.54072		10	0.51778	0.02628
37.5	0.48593	0.50147	0.28945	0.53558	0.55297	0.56932	0.53461	0.55827	0.56886	0.54797		10	0.51444	0.02645
38	0.49696	0.49273	0.29502	0.56413	0.55339	0.56605	0.53418	0.57523	0.56586	0.53676		10	0.51803	0.02639
38.5	0.49163	0.50217	0.32311	0.52861	0.54634	0.56228	0.54047	0.56773	0.58669	0.54056		10	0.51896	0.02357
39	0.49595	0.50841	0.33001	0.55799	0.55518	0.56914	0.53786	0.55726	0.57143	0.55062		10	0.52338	0.02287
39.5	0.49365	0.49576	0.34904	0.56572	0.55155	0.58155	0.53778	0.56825	0.58504	0.53874		10	0.52671	0.02215
40	0.50029	0.50784	0.36549	0.54148	0.56069	0.56564	0.54088	0.56819	0.57586	0.53288		10	0.52592	0.01952
40.5	0.50321	0.50947	0.38437	0.55582	0.54457	0.57232	0.53002	0.56224	0.55766	0.54284		10	0.52625	0.01727
41	0.50016	0.51619	0.38106	0.55808	0.56319	0.57316	0.53578	0.56804	0.5661	0.54699		10	0.53088	0.01828
41.5	0.50356	0.51601	0.38707	0.54432	0.54184	0.57122	0.54293	0.56051	0.58	0.55257		10	0.53	0.01747
42	0.50356	0.52521	0.39932	0.56332	0.56009	0.56647	0.53818	0.56151	0.55122	0.55817		10	0.53271	0.01612
42.5	0.50755	0.51026	0.40941	0.56502	0.5492	0.57285	0.53573	0.56942	0.59584	0.53677		10	0.5352	0.01652
43	0.51047	0.52656	0.38453	0.57035	0.56408	0.58379	0.54404	0.57666	0.57634	0.54519		10	0.5382	0.01865
43.5	0.50953	0.52778	0.41902	0.56329	0.55637	0.57068	0.53468	0.56255	0.56579	0.54818		10	0.53579	0.01436
44	0.51783	0.52502	0.41346	0.56	0.54522	0.57155	0.53155	0.57088	0.57393	0.54499		10	0.53544	0.01496
44.5	0.52004	0.52977	0.4128	0.56998	0.55425	0.56694	0.54646	0.57315	0.56209	0.54835		10	0.53838	0.01497
45	0.51778	0.52347	0.42136	0.56143	0.5512	0.58117	0.54429	0.56643	0.59147	0.53907		10	0.53977	0.01509
45.5	0.51004	0.52385	0.40835	0.5627	0.55418	0.55693	0.53988	0.55728	0.57022	0.55766		10	0.53411	0.01515
46	0.51604	0.53773	0.41247	0.54891	0.57587	0.56864	0.54073	0.56837	0.58222	0.55627		10	0.54073	0.01559
46.5	0.51778	0.53905	0.43772	0.54877	0.56041	0.57214	0.53609	0.56187	0.56924	0.55338		10	0.53964	0.01248
47	0.51588	0.53114	0.41016	0.55496	0.5524	0.57375	0.54614	0.57096	0.56326	0.55826		10	0.53769	0.01522
47.5	0.51744	0.52679	0.42374	0.55195	0.55955	0.5723	0.54393	0.5647	0.5894	0.5526		10	0.54024	0.01453
48	0.52083	0.53254	0.43612	0.56042	0.56247	0.56846	0.54144	0.56556	0.5651	0.56427		10	0.54172	0.01282
48.5	0.51723	0.53031	0.42912	0.57525	0.56351	0.57537	0.53425	0.56691	0.58976	0.55123		10	0.54329	0.01461
49	0.51511	0.52422	0.4126	0.55888	0.56447	0.56841	0.54122	0.57644	0.57611	0.56496		10	0.54024	0.01568
49.5	0.52021	0.53381	0.43081	0.56366	0.56588	0.5714	0.5368	0.56775	0.57451	0.56325		10	0.54281	0.01374
50	0.92603	0.74921	0.42216	0.56123	0.56193	0.5795	0.53308	0.57102	0.58328	0.54714		10	0.60346	0.0437
50.5	0.97271	0.8353	0.41864	0.56574	0.5607	0.56204	0.54118	0.56883	0.64746	0.96348		10	0.66361	0.06052
51	0.94333	0.97413	0.70513	0.9493	0.9708	0.98326	0.99173	0.96675	0.95535	0.80409		10	0.92439	0.02961
51.5	0.90015	0.97097	0.88482	0.97156	0.95683	0.97454	0.97529	0.97027	0.94177	0.83494		10	0.93811	0.01536
52	0.87705	0.93942	0.94321	0.93232	0.89048	0.91995	0.86282	0.91202	0.87826	0.83754		10	0.89931	0.01124
52.5	0.86217	0.919	0.96498	0.94979	0.89997	0.91597	0.89542	0.95792	0.96275	0.89412		10	0.92221	0.01114
53	0.85848	0.90942	0.97101	0.93738	0.8958	0.91379	0.89795	0.94836	0.95716	0.92723		10	0.92166	0.0106
53.5	0.84796	0.89492	0.96986	0.94158	0.90674	0.90652	0.87339	0.92574	0.94667	0.94034		10	0.91537	0.01166
54	0.85066	0.88936	0.95762	0.89836	0.90243	0.90225	0.86988	0.90661	0.93943	0.9242		10	0.90408	0.00989
54.5	0.85271	0.87837	0.92455	0.92685	0.90044	0.8944	0.87234	0.90043	0.95089	0.93476		10	0.90357	0.00972
55	0.84542	0.86102	0.89117	0.90451	0.88577	0.89497	0.84625	0.8981	0.91274	0.91953		10	0.88595	0.00836
55.5	0.85145	0.84574	0.86479	0.91008	0.83211	0.8906	0.84247	0.88617	0.93099	0.92036		10	0.87748	0.01113
56	0.84775	0.82005	0.87593	0.90409	0.84783	0.8918	0.83721	0.88991	0.91773	0.91451		10	0.87468	0.01089
56.5	0.84358	0.83868	0.85376	0.8892	0.83466	0.87426	0.82689	0.88332	0.91097	0.91415		10	0.86695	0.01008
57	0.8348	0.83067	0.85961	0.86753	0.83367	0.8555	0.81946	0.87826	0.90283	0.90148		10	0.85838	0.00929
57.5	0.82134	0.83674	0.81216	0.87835	0.80495	0.84455	0.812	0.8626	0.88753	0.88709		10	0.84473	0.01022
58	0.82388	0.83165	0.79872	0.85198	0.80072	0.81652	0.78172	0.84048	0.84755	0.87147		10	0.82647	0.00875
rerative DF	AM251
sec	Exp #1	#2	#3	#4	#5	#6	#7	#8		N	Average	SEM
-10	0.00758	0.00524	0.00705	0.01687	0.01018	0.00676	0.01063	0.01283		8	0.00964	0.00135
-9.5	0.00658	0.00772	0.00164	0.01715	0.01849	0.01262	0.00585	0.01162		8	0.01021	0.00205
-9	0.00101	0.00416	0.00128	0.01272	0.00852	0.00891	0.0122	0.01189		8	0.00759	0.00171
-8.5	0.00305	0.00166	0.00095	0.01399	0.00432	0.00826	0.01296	0.00689		8	0.00651	0.00175
-8	-0.00158	0.00433	0.00221	0.01065	0.01822	0.00171	0.00433	0.00843		8	0.00604	0.00221
-7.5	0.00176	0.00152	-0.00058	0.0105	0.01684	0.00424	0.01302	0.01179		8	0.00739	0.00227
-7	0.00018	0.00231	-0.0013	0.00616	0.00971	0.00556	0.01225	0.00923		8	0.00551	0.0017
-6.5	0.00102	0.00225	0.00215	0.00647	0.00209	0.00464	0.01292	0.00629		8	0.00473	0.00138
-6	-0.00206	-0.00259	-0.00214	0.00387	0.00212	0.005	0.01002	0.0045		8	0.00234	0.00156
-5.5	-0.00375	-0.00306	-0.0009	0.01029	0.00655	0.00652	0.01023	-0.00112		8	0.00309	0.00209
-5	7e-05	-0.00132	-0.00083	0.00331	0.00401	0.00952	0.00932	0.00954		8	0.0042	0.00167
-4.5	-0.00375	0.0011	0.00104	0.00384	0.00302	0.00485	0.01124	0.00226		8	0.00295	0.0015
-4	-0.00127	-0.00128	0.00285	0.00046	0.00352	0.00488	0.00704	0.00516		8	0.00267	0.00109
-3.5	0.00516	-0.00027	-0.00014	0.00623	0.00414	0.00603	0.00254	0.00283		8	0.00332	0.0009
-3	0.00182	-0.00129	-0.00521	0.00502	0.00384	0.00404	-0.00073	0.00062		8	0.00101	0.0012
-2.5	0.00207	0.00033	0.00187	-0.00046	0.00438	0.00541	0.01332	0.00314		8	0.00376	0.00153
-2	-5e-05	-0.00011	-0.00411	0.00394	0.00232	-0.00326	-0.00254	1e-05		8	-0.00048	0.00097
-1.5	-0.00203	0.0008	-0.00303	-0.0023	-0.00599	-0.00376	-0.00601	-0.00109		8	-0.00293	0.00082
-1	1e-05	-0.00102	0.00527	-0.00117	-0.00071	0.00161	-0.00476	-0.00206		8	-0.00036	0.00103
-0.5	0.00375	0.00075	0.00693	-0.00191	-0.00973	0.00116	-0.01189	0.00016		8	-0.00135	0.00227
0
0.5
1
1.5
2
2.5
3	0.10782	0.17076	0.23472	0.10303	-0.13343	-0.0357	-0.07179	-0.03807		8	0.04217	0.04589
3.5	0.16141	0.20852	0.25285	0.10971	-0.10819	-0.01981	-0.05747	0.31156		8	0.10732	0.05442
4	0.21954	0.234	0.2903	0.11176	-0.11047	-0.02161	-0.06325	0.33402		8	0.12429	0.06041
4.5	0.2736	0.25569	0.30332	0.11427	-0.1135	-0.02207	-0.0553	0.34314		8	0.13739	0.06387
5	0.32619	0.27684	0.31184	0.12996	-0.10262	-0.01603	-0.0485	0.34852		8	0.15328	0.06599
5.5	0.36446	0.28946	0.33215	0.15389	-0.09136	-0.0074	-0.03747	0.35678		8	0.17007	0.06766
6	0.39609	0.30739	0.33936	0.18304	-0.07295	0.00424	-0.02014	0.36233		8	0.18742	0.06762
6.5	0.42071	0.32668	0.33831	0.20838	-0.04408	0.0198	0.00463	0.35904		8	0.20418	0.06537
7	0.43567	0.34839	0.35089	0.23245	-0.02385	0.04758	0.05221	0.36172		8	0.22563	0.06232
7.5	0.45515	0.36899	0.35718	0.26015	0.00071	0.07785	0.09133	0.36954		8	0.24761	0.05962
8	0.46746	0.37785	0.36093	0.28276	0.01577	0.11654	0.13989	0.36189		8	0.26539	0.05549
8.5	0.47476	0.38563	0.35624	0.30457	0.03549	0.16608	0.18015	0.37087		8	0.28422	0.05112
9	0.49053	0.39599	0.3614	0.33275	0.05946	0.22168	0.22469	0.37929		8	0.30822	0.04739
9.5	0.49536	0.40102	0.36149	0.35516	0.09274	0.28134	0.24986	0.38136		8	0.32729	0.04261
10	0.49956	0.40489	0.36862	0.38791	0.10921	0.32682	0.27728	0.37288		8	0.3434	0.04034
10.5	0.50819	0.41641	0.37402	0.41864	0.14832	0.36499	0.31182	0.37967		8	0.36526	0.03686
11	0.52039	0.42383	0.37624	0.43816	0.19318	0.39154	0.33238	0.38544		8	0.38264	0.03336
11.5	0.52524	0.42812	0.37135	0.45577	0.23219	0.41177	0.36246	0.39214		8	0.39738	0.02992
12	0.53897	0.42804	0.37288	0.47318	0.27744	0.43455	0.37942	0.39317		8	0.41221	0.02728
12.5	0.54174	0.43918	0.37467	0.48534	0.31034	0.44767	0.38684	0.39056		8	0.42204	0.02544
13	0.54338	0.44063	0.38084	0.49418	0.35002	0.45189	0.40017	0.39824		8	0.43242	0.02245
13.5	0.55788	0.44458	0.38385	0.506	0.37267	0.46507	0.42446	0.39814		8	0.44408	0.02254
14	0.5604	0.45108	0.3928	0.51189	0.38799	0.45929	0.41521	0.39457		8	0.44665	0.02213
14.5	0.56642	0.4542	0.39226	0.5219	0.4052	0.46302	0.43189	0.39704		8	0.45399	0.02206
15	0.57758	0.46378	0.3939	0.52617	0.42475	0.46904	0.44167	0.40255		8	0.46243	0.02216
15.5	0.57535	0.45703	0.39307	0.52921	0.44103	0.47769	0.43958	0.39479		8	0.46347	0.02229
16	0.58743	0.45626	0.39986	0.53157	0.44135	0.47306	0.44557	0.39779		8	0.46661	0.02285
16.5	0.59472	0.46433	0.39228	0.53787	0.45649	0.48432	0.44907	0.399		8	0.47226	0.02393
17	0.59458	0.46333	0.39396	0.55144	0.45919	0.48092	0.4517	0.4021		8	0.47465	0.02427
17.5	0.60169	0.46701	0.39431	0.53661	0.46117	0.47798	0.45013	0.39977		8	0.47358	0.02423
18	0.60084	0.46515	0.39676	0.54319	0.46349	0.4904	0.45697	0.40573		8	0.47782	0.02395
18.5	0.60876	0.46888	0.39175	0.54816	0.47465	0.4947	0.45978	0.40239		8	0.48113	0.02529
19	0.6135	0.46847	0.40118	0.54766	0.4789	0.48428	0.46445	0.40499		8	0.48293	0.02484
19.5	0.61974	0.47446	0.40136	0.55813	0.47113	0.49009	0.47683	0.40233		8	0.48676	0.02595
20	0.62306	0.47188	0.3979	0.5569	0.49401	0.49683	0.4654	0.40849		8	0.48931	0.02615
20.5	0.62764	0.47863	0.40383	0.55933	0.48418	0.49294	0.47083	0.40607		8	0.49043	0.02631
21	0.63182	0.47435	0.40598	0.55789	0.48024	0.49917	0.47793	0.40817		8	0.49194	0.0264
21.5	0.63297	0.47478	0.40421	0.55945	0.48574	0.49176	0.47681	0.41881		8	0.49306	0.02606
22	0.64218	0.47352	0.40498	0.55471	0.48693	0.49535	0.48768	0.4107		8	0.4945	0.02706
22.5	0.63812	0.4734	0.41383	0.56368	0.49432	0.49966	0.48363	0.40408		8	0.49634	0.02695
23	0.64168	0.47509	0.41573	0.55926	0.49624	0.4972	0.47397	0.40437		8	0.49544	0.02705
23.5	0.64531	0.47411	0.40612	0.5637	0.50396	0.50152	0.48649	0.41599		8	0.49965	0.02736
24	0.64859	0.47709	0.41125	0.56561	0.50225	0.51026	0.4943	0.40669		8	0.50201	0.0279
24.5	0.65109	0.47047	0.41623	0.56123	0.50914	0.51028	0.48779	0.40693		8	0.50164	0.02785
25	0.66031	0.47437	0.41284	0.56782	0.50351	0.50088	0.49017	0.41615		8	0.50326	0.02854
25.5	0.65802	0.47801	0.41389	0.55959	0.51031	0.50747	0.50115	0.41753		8	0.50575	0.02775
26	0.66715	0.48132	0.4266	0.5634	0.50771	0.51001	0.49506	0.40829		8	0.50744	0.02861
26.5	0.66939	0.48235	0.43104	0.56545	0.51824	0.50804	0.4944	0.41361		8	0.51031	0.02837
27	0.66643	0.47379	0.42208	0.56611	0.51887	0.51933	0.49737	0.41434		8	0.50979	0.0287
27.5	0.67531	0.47409	0.43163	0.56389	0.51397	0.51335	0.50347	0.41706		8	0.5116	0.02877
28	0.67144	0.48227	0.43805	0.56626	0.51486	0.5078	0.50455	0.41459		8	0.51248	0.02812
28.5	0.6799	0.4883	0.43524	0.56403	0.5278	0.5163	0.50213	0.4188		8	0.51656	0.02873
29	0.67263	0.48361	0.43517	0.55352	0.52041	0.51157	0.49515	0.42203		8	0.51176	0.02761
29.5	0.6815	0.49282	0.44306	0.56865	0.52029	0.52317	0.50154	0.41143		8	0.51781	0.02903
30	0.68275	0.48745	0.43815	0.56517	0.52313	0.51701	0.51167	0.42078		8	0.51826	0.02872
30.5	0.68916	0.48186	0.44298	0.55752	0.53008	0.52271	0.51798	0.41809		8	0.52005	0.02925
31	0.69058	0.47763	0.44085	0.56723	0.52639	0.51947	0.51406	0.41861		8	0.51935	0.0298
31.5	0.69441	0.48205	0.40498	0.54774	0.52387	0.5197	0.50894	0.41554		8	0.51215	0.03174
32	0.70051	0.48137	0.41383	0.54442	0.53697	0.52589	0.51399	0.41982		8	0.5171	0.0317
32.5	0.70159	0.48988	0.41573	0.55085	0.53815	0.53197	0.53891	0.42283		8	0.52374	0.03159
33	0.6995	0.48418	0.40612	0.55188	0.5376	0.53104	0.52281	0.42159		8	0.51934	0.03207
33.5	0.7079	0.48861	0.41125	0.54667	0.54168	0.52495	0.53218	0.42692		8	0.52252	0.03221
34	0.70903	0.48547	0.41623	0.54069	0.54494	0.53159	0.5239	0.42295		8	0.52185	0.03226
34.5	0.71551	0.48249	0.41284	0.5485	0.55708	0.53668	0.52793	0.4226		8	0.52545	0.03351
35	0.71464	0.47942	0.41389	0.5409	0.54809	0.54589	0.536	0.42585		8	0.52558	0.03315
35.5	0.71892	0.48755	0.4266	0.55003	0.54543	0.54271	0.53985	0.42635		8	0.52968	0.03268
36	0.71847	0.48226	0.43104	0.54655	0.55726	0.54442	0.54313	0.42734		8	0.53131	0.0326
36.5	0.72095	0.48074	0.42208	0.55248	0.55101	0.55606	0.54428	0.42464		8	0.53153	0.03366
37	0.72151	0.48024	0.43163	0.55089	0.57459	0.5599	0.54656	0.42917		8	0.53681	0.03333
37.5	0.72592	0.48524	0.43805	0.55592	0.56328	0.56143	0.55199	0.44164		8	0.54043	0.03247
38	0.7342	0.49528	0.43524	0.55234	0.56756	0.57022	0.54958	0.43194		8	0.54204	0.03387
38.5	0.72913	0.48653	0.43517	0.55794	0.56721	0.56657	0.555	0.43563		8	0.54165	0.0334
39	0.72714	0.49548	0.44306	0.55515	0.57279	0.57518	0.57106	0.43408		8	0.54674	0.03294
39.5	0.73626	0.48028	0.43815	0.55884	0.57672	0.57728	0.57268	0.43561		8	0.54698	0.03462
40	0.73596	0.48239	0.41383	0.54872	0.57112	0.57882	0.56314	0.44424		8	0.54228	0.03532
40.5	0.74086	0.48523	0.41573	0.5499	0.58115	0.58424	0.58043	0.43191		8	0.54618	0.03673
41	0.74046	0.4894	0.40612	0.55357	0.58357	0.58946	0.5815	0.44127		8	0.54817	0.03687
41.5	0.74932	0.49143	0.41125	0.55256	0.5957	0.59644	0.57939	0.44585		8	0.55274	0.0374
42	0.74774	0.49617	0.41623	0.54808	0.5892	0.59484	0.57899	0.43669		8	0.55099	0.03711
42.5	0.74746	0.49542	0.41284	0.55139	0.59219	0.60809	0.59191	0.44905		8	0.55604	0.03722
43	0.75196	0.49639	0.41389	0.55628	0.60029	0.6125	0.59093	0.44956		8	0.55897	0.03774
43.5	0.75705	0.49195	0.4266	0.55767	0.60211	0.62136	0.59778	0.44953		8	0.56301	0.03788
44	0.75898	0.49982	0.43104	0.55664	0.60936	0.62516	0.59953	0.44511		8	0.5657	0.03804
44.5	0.75976	0.49709	0.42208	0.56178	0.6061	0.62451	0.60073	0.45401		8	0.56576	0.03822
45	0.76056	0.49563	0.43163	0.55842	0.61095	0.62518	0.61003	0.45748		8	0.56874	0.03782
45.5	0.76649	0.50065	0.43805	0.56179	0.60314	0.59644	0.57939	0.44585		8	0.56147	0.03723
46	0.76525	0.50178	0.43524	0.5682	0.60452	0.59484	0.57899	0.43669		8	0.56069	0.03778
46.5	0.77728	0.50163	0.43517	0.57265	0.61181	0.60809	0.59191	0.44905		8	0.56845	0.03876
47	0.77412	0.50986	0.44306	0.57624	0.61704	0.6125	0.59093	0.44956		8	0.57166	0.03789
47.5	0.77172	0.50582	0.43815	0.58365	0.62125	0.62136	0.59778	0.44953		8	0.57366	0.03846
48	0.76894	0.50896	0.44298	0.58631	0.62809	0.62516	0.59953	0.44511		8	0.57563	0.03834
48.5	0.77953	0.51186	0.44085	0.58266	0.63026	0.62451	0.60073	0.45401		8	0.57805	0.03887
49	0.78452	0.51258	0.44493	0.58833	0.62433	0.62518	0.61003	0.45748		8	0.58092	0.03887
49.5	0.78369	0.51588	0.43219	0.59061	0.63553	0.64289	0.62219	0.45512		8	0.58476	0.04049
50	0.79037	0.52244	0.43787	0.58229	0.58245	0.57117	0.52113	0.9432		8	0.61887	0.05843
50.5	0.68798	0.49425	0.43246	0.5972	0.6195	0.59317	0.54112	0.99499		8	0.62008	0.06031
51	0.74195	0.82534	0.87835	0.75096	0.64551	0.62398	0.59955	0.94979		8	0.75193	0.04463
51.5	0.89663	0.89012	0.94483	0.7778	0.66939	0.66074	0.65302	0.92981		8	0.80279	0.04507
52	0.91319	0.85313	0.91006	0.78407	0.6827	0.65205	0.58782	0.93763		8	0.79008	0.04759
52.5	0.96023	0.92409	0.96507	0.82171	0.66951	0.64817	0.63732	0.93355		8	0.81996	0.05175
53	0.99476	0.92629	0.9498	0.81977	0.72075	0.80121	0.81964	0.93128		8	0.87044	0.03298
53.5	0.92731	0.90749	0.95858	0.84945	0.85616	0.9359	0.92823	0.92632		8	0.91118	0.01369
54	0.97377	0.92992	0.96437	0.86596	0.89434	0.98523	0.98659	0.92769		8	0.94098	0.01568
54.5	0.98417	0.92746	0.94546	0.88928	0.93572	0.99705	0.97556	0.90625		8	0.94512	0.01348
55	0.97172	0.95381	0.93952	0.90037	0.95359	0.99028	0.9892	0.88952		8	0.9485	0.01328
55.5	0.97236	0.93131	0.93372	0.90559	0.91634	0.9365	0.94358	0.88403		8	0.92793	0.00935
56	0.95506	0.92388	0.91323	0.91505	0.94436	0.88878	0.90387	0.87226		8	0.91456	0.00962
56.5	0.94196	0.91638	0.90371	0.93683	0.92986	0.85873	0.87052	0.85302		8	0.90138	0.01272
57	0.94135	0.89222	0.89793	0.93895	0.90699	0.84582	0.83177	0.84442		8	0.88743	0.01509
57.5	0.93143	0.88467	0.87773	0.94085	0.89437	0.811	0.78929	0.85061		8	0.87249	0.01889
58	0.91605	0.86323	0.86074	0.93869	0.87273	0.80003	0.76325	0.84257		8	0.85716	0.02013
Results from Student's t-test
relative Dfionomycin max (at 49 sec)
p_two_tail	0.35637

## Sheet: Figure 8-figure supplement 1B
Data related to Figure S6B: DF/F of GCaMP7f upon the repetitive 400 APs trains and KCl
DF/F(GCaMP7f) (A.U.)
sec	bouton #1	#2	#3	#4	#5	#6	#7	#8	#9	#10	#11	#12	#13	#14	#15		N	Average	SEM
-73	1.04692	0.98516	1.03453	0.92883	1.01062	0.96375	0.94063	1.15701	1.07033	1.0256	1.83	1.78951	1.66118	1.60603	1.48502		15	1.23567	0.08626
-72.5	0.98704	0.99841	0.98682	0.89535	0.97553	1.04114	1.03392	1.04958	1.05844	0.90756	1.6839	1.65767	1.65081	1.52981	1.46401		15	1.19467	0.07809
-72	1.01006	0.98099	0.99464	0.92584	1.02875	0.93871	0.95562	1.06887	0.92939	1.00726	1.4968	1.27445	1.39451	1.29224	1.31232		15	1.10736	0.04929
-71.5	0.98955	0.99891	1.09069	1.06462	1.06679	0.9419	0.96456	1.19052	0.84939	1.003	1.48002	1.28805	1.30848	1.23319	1.26649		15	1.11574	0.04438
-71	1.01391	0.98746	1.04423	1.0448	1.04353	1.11148	0.99773	1.06666	1.10806	0.93339	1.66609	1.68582	1.60031	1.4688	1.45555		15	1.21519	0.07059
-70.5	0.97249	0.96401	1.05582	0.93893	1.05574	0.95761	0.95389	1.05675	1.11372	1.03129	1.56886	1.55325	1.53979	1.42991	1.51311		15	1.18034	0.06599
-70	0.96032	0.98006	1.06466	1.04012	1.04664	1.02225	0.89708	0.96001	1.02674	0.86778	1.41257	1.28835	1.30545	1.26196	1.39924		15	1.10221	0.04674
-69.5	1.0501	0.96674	1.03718	1.11101	1.0566	0.87088	0.98273	0.95688	0.94977	0.90614	1.32033	1.17942	1.21542	1.17712	1.24755		15	1.06852	0.03479
-69	0.99954	0.97409	1.0057	1.04087	0.97398	1.04956	0.92447	1.08556	0.9126	1.05441	1.188	1.13541	1.21322	1.12061	1.22358		15	1.06011	0.02569
-68.5	0.99599	0.97452	1.04496	1.07061	1.02361	0.979	0.9262	0.9793	1.01901	1.06254	1.17711	1.06608	1.1306	1.08692	1.16666		15	1.04687	0.01877
-68	1.01952	0.98336	1.03568	0.93557	1.03941	1.12627	1.05007	1.06457	1.03033	1.03542	1.01928	0.98928	1.03269	1.02816	1.07117		15	1.03072	0.01106
-67.5	1.02967	0.95044	1.02772	1.062	1.02571	1.04046	1.06363	0.9145	1.05391	0.94501	1.03818	0.9099	1.01096	0.98812	1.05874		15	1.00793	0.01378
-67	0.98491	0.98678	1.00396	1.0592	1.01801	1.02749	0.91279	1.07083	0.98146	0.91066	0.96048	0.85382	0.94858	0.93899	1.00034		15	0.97722	0.01503
-66.5	0.99382	0.95387	1.00652	1.08594	0.94511	0.87498	0.97826	0.96731	0.81015	0.96077	0.89553	0.75914	0.89271	0.90291	0.93556		15	0.93084	0.02066
-66	0.99071	0.96482	0.99619	1.00645	1.03731	0.89501	1.01835	1.00668	1.03033	0.93507	1.05086	0.994	1.0593	1.04657	1.02575		15	1.00383	0.01156
-65.5	0.99973	0.99306	1.01178	1.06556	1.04392	0.99129	1.06464	0.91189	1.00033	1.02845	1.09589	1.18992	1.14822	1.12934	1.09658		15	1.05137	0.01864
-65	1.00269	0.99729	0.99995	1.05602	0.98899	0.95055	0.97437	0.99012	1.00542	0.94966	1.02946	0.97809	1.02019	1.00022	0.98718		15	0.99535	0.00712
-64.5	0.98416	0.99412	0.98682	0.96306	1.00385	0.93666	1.04214	1.06483	1.03165	1.05841	0.90053	0.84582	0.83074	0.86614	0.9161		15	0.96167	0.0197
-64	1.01343	1.01552	1.00145	0.91537	0.96324	1.12149	0.91885	1.03315	0.9626	0.96348	0.97412	0.98618	1.00084	1.0043	1.00014		15	0.99161	0.01271
-63.5	1.0053	0.96986	1.09382	1.06462	1.00152	0.90024	0.94524	1.05831	0.94524	0.94592	0.99622	1.08763	1.04983	1.02115	0.99285		15	1.00518	0.01487
-63	0.9952	0.97689	0.99174	1.04723	0.99381	0.99812	0.96644	1.06496	1.09485	1.02431	1.08878	1.06932	1.04198	1.03418	0.9974		15	1.02568	0.01059
-62.5	1.05556	1.06181	1.11531	1.29487	1.1204	1.24191	0.93716	1.1282	1.09561	1.07791	1.47086	1.63792	1.43283	1.36685	1.23071		15	1.21786	0.04916
-62	1.11521	1.16118	1.2285	1.47031	1.29015	1.15564	1.02527	1.14541	1.57181	1.15372	1.78286	2.07118	1.84601	1.69158	1.53697		15	1.41639	0.08268
-61.5	1.1746	1.24641	1.38162	1.66763	1.39511	1.43356	1.211	1.47228	1.90633	1.2307	2.0547	2.2542	1.97401	1.81908	1.64933		15	1.59137	0.08863
-61	1.29888	1.38535	1.58709	1.87805	1.65177	1.71832	1.23595	1.86981	2.45743	1.31155	2.59185	2.63716	2.45963	2.18151	2.04131		15	1.88704	0.1263
-60.5	1.39812	1.55576	1.81588	2.28486	1.8763	2.03744	1.44461	2.14075	2.90798	1.45026	2.94101	2.72017	2.61837	2.28335	2.19976		15	2.11164	0.13568
-60	1.49774	1.81509	2.13641	2.45656	1.98561	2.59489	1.65716	2.72095	4.03151	1.54687	3.23834	2.69552	2.7487	2.35385	2.44843		15	2.39517	0.17456
-59.5	1.63433	2.01064	2.37674	3.20771	2.36869	3.08906	1.82069	2.96255	4.71468	1.78657	3.18941	2.6908	2.76196	2.32347	2.50121		15	2.62923	0.19904
-59	1.77683	2.22411	2.725	3.44001	2.59027	3.09884	2.15538	3.36595	5.27503	1.92025	3.25186	2.71221	2.8681	2.4044	2.6533		15	2.83077	0.21759
-58.5	1.87338	2.42551	3.0367	3.60105	2.8281	3.45439	2.25805	3.89335	5.88708	2.0906	3.28139	2.65897	2.86517	2.34874	2.70215		15	3.01364	0.25291
-58	1.99673	2.62647	3.23748	4.1616	3.16396	3.68656	2.52655	4.12517	6.56214	2.25811	3.3749	2.62982	2.86579	2.32487	2.85644		15	3.22644	0.29099
-57.5	2.14873	2.79844	3.57304	4.67446	3.14965	4.07147	2.54169	4.42022	7.0474	2.25798	3.45433	2.65285	2.89753	2.33564	2.91509		15	3.3959	0.3285
-57	2.26407	3.09597	3.86899	4.84018	3.3776	4.35987	2.76535	5.0042	7.66266	2.56898	3.41442	2.6282	2.83281	2.30451	2.99394		15	3.59878	0.36597
-56.5	2.36631	3.25382	4.08663	4.95951	3.62283	4.66853	2.87927	5.29079	8.35074	2.58655	3.42269	2.55009	2.84114	2.24972	2.97497		15	3.74024	0.41099
-56	2.52314	3.45802	4.42185	5.73478	3.90812	4.91527	3.13522	5.57072	8.72298	2.59326	3.28792	2.52635	2.86028	2.20936	2.94375		15	3.92073	0.44835
-55.5	2.72732	3.79051	4.64416	5.75461	4.10246	5.29904	3.16147	5.86329	9.13919	2.59016	3.37055	2.54336	2.82059	2.17295	2.93132		15	4.06073	0.47691
-55	2.67328	3.90474	5.02598	6.40512	4.34854	5.26535	3.5759	6.24101	9.07882	2.87133	3.39431	2.53684	2.7318	2.19342	2.89738		15	4.20959	0.49056
-54.5	2.87408	4.19487	5.2665	6.71374	4.6413	5.35048	3.43848	6.49669	9.09504	3.01482	3.28119	2.41091	2.73135	2.17108	2.85747		15	4.30253	0.5067
-54	2.94448	4.23774	5.5261	7.26868	4.78072	5.58994	3.56422	6.46579	9.44786	2.97491	3.13791	2.4207	2.63558	2.09729	2.84356		15	4.3957	0.54349
-53.5	3.13761	4.50123	5.85035	7.52661	4.83261	5.45906	3.66718	6.69448	9.42899	3.1729	3.16327	2.40772	2.62405	2.10176	2.77748		15	4.48969	0.55135
-53	3.20785	4.70244	5.98291	8.06434	5.20691	5.93069	3.76726	6.75537	9.53785	3.12563	3.15764	2.39426	2.62969	2.06451	2.79005		15	4.62116	0.57909
-52.5	3.34003	4.77238	6.42687	8.27195	5.27802	5.85034	3.79235	6.79787	9.7386	3.12292	3.13547	2.46122	2.57733	2.02595	2.73148		15	4.68819	0.59897
-52	3.41828	5.01552	6.64291	8.30375	5.47291	5.96961	3.95746	7.17429	9.60766	3.30516	3.15988	2.33774	2.60556	2.02554	2.75443		15	4.78338	0.60392
-51.5	3.60748	5.17088	6.91665	8.72215	5.89264	5.8665	3.97592	7.07885	10.0237	3.42682	3.12702	2.30911	2.5774	1.98729	2.77829		15	4.89738	0.63471
-51	3.70822	5.46436	7.16544	9.02085	5.93807	6.0989	4.20794	7.07077	9.52766	3.34933	3.10953	2.31933	2.53492	1.94469	2.701		15	4.94407	0.63388
-50.5	3.72233	5.49753	7.4244	9.17236	6.09989	6.3766	4.3755	7.26204	9.79482	3.39556	3.0205	2.21766	2.47174	1.95152	2.7022		15	5.03231	0.66171
-50	3.90274	5.8126	7.49761	9.43945	6.37126	6.281	4.27153	7.17924	9.81067	3.46311	2.96772	2.18138	2.46985	1.91108	2.71279		15	5.0848	0.67351
-49.5	4.02081	5.80028	7.69646	9.64238	6.40907	6.40414	4.55647	7.04195	9.70313	3.51593	2.92422	2.14654	2.38041	1.91423	2.66693		15	5.12153	0.68007
-49	4.06242	5.96211	7.88899	9.52174	6.38495	6.54891	4.43751	7.37664	10.0159	3.65387	2.91186	2.12622	2.33098	1.87596	2.629		15	5.18181	0.69857
-48.5	4.18599	6.26884	8.27684	10.1438	7.09495	6.60786	4.68784	7.57182	9.78501	3.76391	3.04317	2.10672	2.28281	1.85314	2.59562		15	5.35122	0.72702
-48	4.23097	6.39266	8.26602	10.4466	6.81978	6.35839	4.69909	7.4537	9.31088	3.69055	2.84602	2.06384	2.29541	1.78473	2.57213		15	5.28205	0.72389
-47.5	4.48263	6.66474	8.7222	10.7863	7.31342	6.26393	4.73716	7.29737	9.52861	3.82706	2.78312	2.12779	2.28546	1.82228	2.55856		15	5.41337	0.75146
-47	4.468	6.82339	8.88165	10.94	7.53126	6.48267	4.56801	7.30897	9.34013	3.67905	2.7958	2.05776	2.20866	1.79273	2.53853		15	5.42778	0.7671
-46.5	4.54902	6.93265	8.92684	11.2073	7.58245	6.65589	4.75143	7.49333	9.37993	3.78302	2.73687	1.97712	2.28209	1.77163	2.53417		15	5.50425	0.78248
-46	4.62364	7.00078	8.94983	11.1957	7.45493	6.63518	4.98792	7.30936	9.50917	3.80575	2.7639	1.98538	2.12524	1.72419	2.49197		15	5.5042	0.78524
-45.5	4.66656	6.9011	9.15346	11.2459	7.73291	6.53935	5.01893	7.37338	9.53295	3.87278	2.7254	1.99762	2.21775	1.73737	2.4618		15	5.54515	0.79233
-45	4.59793	7.01036	9.21522	11.2057	7.70436	6.6156	5.09348	7.46256	9.40088	3.93749	2.68748	2.0221	2.17609	1.70886	2.5008		15	5.55592	0.79164
-44.5	4.70417	7.0923	9.34087	11.3414	7.61691	6.66318	5.08872	7.51706	9.63426	3.97585	2.59147	2.00754	2.20005	1.69289	2.39597		15	5.59085	0.80794
-44	4.68763	7.15446	9.38481	11.1778	7.82946	6.49565	5.15851	7.18055	9.14466	4.01046	2.59813	2.02739	2.16074	1.67129	2.43022		15	5.54078	0.79065
-43.5	4.77041	7.38105	9.52953	11.2606	7.79243	6.49587	5.2433	7.12474	9.2373	3.9393	2.59614	1.93769	2.1113	1.66591	2.39405		15	5.56531	0.80397
-43	4.87927	7.51202	9.68115	11.4222	7.98662	6.64451	5.01157	7.08393	9.21107	3.84011	2.52601	1.91426	2.12841	1.65184	2.35779		15	5.59005	0.82053
-42.5	4.39282	6.55685	8.49481	9.49818	6.91882	4.96603	4.0398	5.61831	7.55398	2.81024	2.37215	1.82159	2.01646	1.59329	2.22881		15	4.72547	0.67475
-42	4.04247	5.85422	7.72085	8.28823	6.07461	3.93012	3.06485	4.19205	5.8401	2.28368	2.33051	1.83899	1.98351	1.60731	2.13502		15	4.0791	0.56845
-41.5	3.74677	5.34055	6.79135	6.97971	5.54682	3.08815	2.42806	3.33753	4.79883	1.65187	2.18403	1.75065	1.94013	1.57084	2.08304		15	3.54922	0.48768
-41	3.49776	4.85208	6.27259	6.59067	4.97825	2.36545	2.05227	2.83256	3.79435	1.53163	2.29689	1.8799	2.09608	1.66145	2.18102		15	3.25886	0.43278
-40.5	3.20448	4.38221	5.74938	5.42822	4.60233	1.82507	1.67504	2.3006	3.0325	1.30625	2.0449	1.73216	1.90994	1.54253	2.02821		15	2.85092	0.38367
-40	2.97273	3.88427	5.15457	4.93818	4.13172	1.49798	1.44951	2.01024	2.64837	1.0845	2.45042	1.95981	2.06665	1.67473	2.33061		15	2.68362	0.32988
-39.5	2.88662	3.63615	4.8859	4.57664	3.70187	1.31907	1.21677	1.70084	2.2314	1.07236	2.56796	1.94324	2.149	1.68348	2.35924		15	2.5287	0.307
-39	2.6335	3.25836	4.36718	4.11147	3.41004	1.07756	1.0394	1.35676	1.83388	1.01036	2.33218	1.7534	1.9613	1.58587	2.11136		15	2.25618	0.28117
-38.5	2.51977	3.08297	4.22565	3.87169	3.32353	1.08667	1.00667	1.2385	1.56785	0.96064	2.21067	1.79799	1.92368	1.56759	2.11142		15	2.16635	0.26899
-38	2.38928	2.86688	3.91467	3.77424	3.10452	0.92779	1.08973	1.2385	1.63653	0.93688	1.94485	1.59093	1.76738	1.44102	1.91143		15	2.03564	0.2515
-37.5	2.23132	2.77219	3.63402	3.35883	2.78453	0.9963	0.98158	1.28401	1.44578	0.8887	1.79023	1.48068	1.66128	1.39603	1.8556		15	1.90407	0.22421
-37	2.20535	2.54715	3.27003	3.17741	2.67507	1.03682	0.92995	1.31595	1.38578	0.89593	1.78632	1.61322	1.73006	1.40033	1.75653		15	1.84839	0.19851
-36.5	2.11966	2.40616	3.11681	2.77303	2.49807	0.94258	0.84632	1.0943	1.24221	0.92254	1.73853	1.52728	1.63556	1.36928	1.64782		15	1.72534	0.18377
-36	1.92959	2.20855	2.72229	2.66043	2.35469	0.85244	0.82642	0.98034	1.15221	0.84053	1.83641	1.67236	1.75099	1.48447	1.81767		15	1.67263	0.16643
-35.5	1.91559	2.09127	2.62857	2.3391	2.12611	1.01246	0.83608	1.04606	1.13749	0.82051	1.87369	1.60373	1.77168	1.4466	1.7906		15	1.6293	0.14525
-35	1.90867	1.93442	2.46869	2.30637	2.00093	0.87521	0.90905	1.02155	1.05523	0.75813	2.02703	1.79112	1.91683	1.5876	1.90325		15	1.63094	0.14411
-34.5	1.81295	1.78889	2.2948	1.99177	1.80293	0.77824	0.77018	0.96835	0.90147	0.79339	2.10684	1.8344	2.01986	1.59683	2.03773		15	1.56658	0.14348
-34	1.69814	1.79225	2.1876	1.93697	1.87062	0.75366	0.79657	0.90238	0.93977	0.76536	1.83993	1.61457	1.7973	1.48036	1.81133		15	1.47912	0.12903
-33.5	1.61693	1.70198	2.05157	1.81633	1.79336	0.86747	0.82094	0.97239	1.02693	0.86713	2.00378	1.75397	1.88811	1.54071	1.81985		15	1.50276	0.11714
-33	1.6572	1.7031	2.05577	1.83597	1.70825	0.85495	0.88107	0.88973	0.99392	0.79623	2.07795	1.8052	1.88732	1.55987	1.90168		15	1.50721	0.12335
-32.5	1.56776	1.51538	1.91863	1.72131	1.54573	0.69834	0.81849	0.94605	0.92958	0.79778	1.96669	1.69684	1.82952	1.5485	1.88895		15	1.42597	0.11752
-32	1.50096	1.44184	1.80989	1.59936	1.46225	0.7095	0.85165	0.86796	0.88373	0.73591	2.36863	2.14357	2.12418	1.76479	2.10186		15	1.49107	0.14652
-31.5	1.47379	1.39126	1.74166	1.71851	1.47804	0.77687	0.77321	0.99456	0.78713	0.85344	2.61843	2.28279	2.37614	1.87824	2.41893		15	1.57087	0.16755
-31	1.46488	1.35337	1.68637	1.67792	1.41479	0.79417	0.76167	0.90746	0.98995	0.71641	2.75532	2.2042	2.42585	1.92238	2.4744		15	1.56994	0.17387
-30.5	1.43177	1.33352	1.66671	1.36688	1.41619	0.77778	0.73759	0.91998	1.00373	0.7261	2.79817	2.30386	2.47667	1.89217	2.57194		15	1.56154	0.18128
-30	1.44142	1.38311	1.67217	1.46021	1.42872	0.60479	0.71841	0.9059	0.96543	0.78938	2.82392	2.2542	2.42527	1.91538	2.57431		15	1.55751	0.18341
-29.5	1.43697	1.37259	1.64247	1.50659	1.45011	0.63188	0.81012	0.80668	0.87713	0.79248	2.53081	1.95412	2.12559	1.73676	2.19632		15	1.45804	0.15145
-29	1.34802	1.32052	1.53672	1.47704	1.31987	0.82513	0.77191	0.81359	0.82751	0.79739	2.25397	1.95076	2.04747	1.65452	2.1013		15	1.40305	0.13466
-28.5	1.34888	1.26931	1.53136	1.53652	1.30478	0.69015	0.69058	0.83132	0.82996	0.71835	2.20894	1.91151	1.99377	1.66173	2.07812		15	1.37368	0.13752
-28	1.33372	1.23042	1.39572	1.42112	1.29755	0.71246	0.82858	0.85961	0.83939	0.75968	2.16507	1.9046	1.98348	1.64761	2.09217		15	1.36474	0.13023
-27.5	1.25487	1.22899	1.42421	1.49743	1.28455	0.83241	0.79686	0.88595	0.87128	0.81405	1.90533	1.56798	1.86068	1.46191	1.87238		15	1.30393	0.10307
-27	1.25936	1.26975	1.38766	1.27354	1.22947	0.81284	0.78272	0.91398	0.8843	0.8125	1.86645	1.55084	1.71185	1.39967	1.78415		15	1.26261	0.09404
-26.5	1.24466	1.20442	1.33662	1.3564	1.2003	0.78962	0.88684	0.89312	0.8143	0.81961	1.67416	1.4427	1.62737	1.33002	1.69586		15	1.22107	0.08228
-26	1.23758	1.17897	1.30687	1.29917	1.20068	0.87862	0.78229	0.91789	0.8409	0.81638	1.76601	1.5633	1.64479	1.35313	1.64344		15	1.22867	0.08492
-25.5	1.19189	1.12702	1.27075	1.11288	1.14615	0.86064	0.74884	0.8394	1.00807	0.77208	1.58237	1.3318	1.55315	1.21415	1.49264		15	1.15012	0.06991
-25	1.18882	1.15135	1.28857	1.26831	1.2434	0.8966	0.79556	0.91333	0.97373	0.6982	1.6846	1.39759	1.6274	1.29127	1.59685		15	1.20104	0.07807
-24.5	1.21663	1.17275	1.27008	1.04667	1.20146	1.02544	0.75807	0.8544	0.94071	0.83601	1.73841	1.50267	1.61109	1.32522	1.66534		15	1.21099	0.08033
-24	1.20031	1.18407	1.25588	1.10109	1.15385	0.92255	0.84041	0.9132	0.7328	0.77156	1.7974	1.61331	1.74494	1.42515	1.69762		15	1.22361	0.0931
-23.5	1.15278	1.07612	1.29977	1.22791	1.09565	0.63734	0.73312	0.87434	1.11202	0.74702	1.69357	1.47828	1.59997	1.32805	1.62162		15	1.17851	0.08622
-23	1.12505	1.07563	1.17635	1.20845	1.05738	0.79008	0.83406	0.90694	0.67563	0.84608	1.75621	1.49769	1.62272	1.37277	1.62123		15	1.17109	0.08733
-22.5	1.10256	1.10107	1.19151	1.21145	1.092	0.7375	0.7598	0.85179	0.98599	0.72067	1.69511	1.45004	1.54481	1.3124	1.63076		15	1.15916	0.08267
-22	1.12442	1.04041	1.13274	1.06911	1.09892	0.69334	0.78503	0.88556	0.91335	0.80437	1.47246	1.30802	1.48426	1.2204	1.51929		15	1.10345	0.06757
-21.5	1.09901	1.06156	1.11551	1.13364	1.15206	0.75502	0.8593	0.85427	0.76657	0.7044	1.57981	1.44283	1.59267	1.29715	1.56803		15	1.13212	0.07998
-21	1.10795	0.99897	1.14047	1.2208	1.15385	0.91322	0.72317	0.73353	0.79562	0.78525	1.49199	1.33958	1.51387	1.22417	1.4708		15	1.10755	0.07127
-20.5	1.11555	0.99244	1.15138	1.18975	1.10188	0.85836	0.67342	0.82754	0.89203	0.84195	1.56565	1.42071	1.58372	1.25281	1.51471		15	1.13213	0.07498
-20	1.08557	0.98273	1.15612	0.98719	1.03163	0.79599	0.84055	0.92063	0.77883	0.80127	1.47989	1.27432	1.43227	1.15348	1.40876		15	1.07528	0.06145
-19.5	1.10833	0.97234	1.13163	1.12447	1.06757	0.95123	0.71769	0.87161	0.92392	0.80049	1.46669	1.23393	1.36349	1.12773	1.4022		15	1.08422	0.0565
-19	1.10084	1.05397	1.16046	1.20883	1.00237	0.7532	0.80234	0.95362	0.89637	0.84259	1.56674	1.36625	1.49259	1.23477	1.46158		15	1.12644	0.06713
-18.5	1.08786	1.06642	1.17398	1.20527	1.09783	0.69812	0.84185	0.92167	0.93467	0.8094	1.56617	1.38552	1.43417	1.2492	1.4677		15	1.12932	0.06707
-18	1.07996	1.01335	1.1355	1.09586	1.05302	0.88431	0.74105	0.84657	0.80317	0.84066	1.48751	1.29679	1.43589	1.20516	1.45016		15	1.09126	0.06327
-17.5	1.07599	0.99829	1.15549	1.1054	1.07091	0.82672	0.74466	0.88973	0.89637	0.77479	1.43979	1.35737	1.40157	1.16847	1.42362		15	1.08861	0.06123
-17	1.05324	0.99736	1.12671	1.15309	1.1046	0.7853	0.83637	0.97787	0.81241	0.80424	1.67474	1.5664	1.53683	1.31031	1.55523		15	1.15298	0.07922
-16.5	1.05901	1.03742	1.11024	1.21332	1.02517	0.8117	0.73572	0.87043	0.72959	0.72765	1.48764	1.39588	1.4256	1.19635	1.43376		15	1.08396	0.07001
-16	1.04928	1.05086	1.1496	1.1097	1.02649	0.83788	0.9425	0.90407	0.98656	0.76962	1.45574	1.35982	1.3973	1.18683	1.42963		15	1.11039	0.05623
-15.5	1.09774	1.04184	1.14284	1.07098	1.1088	0.73249	0.8616	0.79129	0.83185	0.81896	1.54279	1.48611	1.42036	1.25471	1.502		15	1.11362	0.07154
-15	1.03045	0.97913	1.12058	1.04741	1.02532	0.96011	0.75475	0.87773	0.8094	0.80462	1.59211	1.36175	1.40281	1.20571	1.45295		15	1.09499	0.0664
-14.5	1.04733	1.00837	1.08315	1.11176	1.09184	0.89182	0.76585	0.99912	0.98467	0.78525	1.35389	1.2029	1.26097	1.0851	1.33774		15	1.06732	0.0453
-14	1.05631	0.96463	1.05119	1.03675	1.00331	0.65077	0.68524	0.87304	0.84373	0.72829	1.2156	1.19009	1.22031	1.08184	1.2916		15	0.99285	0.05191
-13.5	1.05201	0.98056	1.09706	1.15664	1.01256	0.93575	0.78676	0.83823	0.88713	0.77337	1.46791	1.44869	1.3691	1.24417	1.41952		15	1.09796	0.06269
-13	1.06492	0.94509	1.07161	1.07472	1.01435	0.92619	0.74797	0.93119	0.83977	0.79416	1.22995	1.10516	1.18165	1.02993	1.21375		15	1.01136	0.03789
-12.5	0.99516	0.99424	1.08421	1.12728	0.96402	0.89433	0.79195	0.84775	0.86732	0.85422	1.27242	1.13488	1.1172	0.99168	1.22434		15	1.01073	0.03754
-12	1.03565	0.88306	1.08209	1.15178	1.09293	0.74205	0.86939	0.87578	0.97278	0.7766	1.281	1.19853	1.19583	1.05322	1.28517		15	1.03306	0.04512
-11.5	0.99707	0.91081	1.03873	1.11101	1.01521	0.88522	0.75273	0.88152	0.89166	0.84376	1.32187	1.3058	1.2766	1.126	1.40494		15	1.05086	0.05169
-11	1.0425	0.93931	1.05515	1.15421	1.003	0.74683	0.8443	0.87108	0.80657	0.78822	1.5882	1.52186	1.36366	1.27319	1.51242		15	1.1007	0.07417
-10.5	1.02166	0.97402	1.0634	0.86393	1.05045	0.67376	0.89736	0.81619	0.90524	0.87152	1.54894	1.47373	1.39472	1.20719	1.44072		15	1.08019	0.06985
-10	1.02536	0.9963	0.98933	1.13495	1.05714	0.79417	0.87891	0.89429	0.85034	0.80927	1.53869	1.49419	1.4374	1.25595	1.52755		15	1.11226	0.07003
-9.5	1.04119	0.97203	1.09407	1.09193	0.94955	1.00222	0.72634	0.79207	0.79958	0.76846	1.57603	1.4973	1.41024	1.27245	1.52845		15	1.10146	0.07498
-9	1.02128	1.00227	1.04124	1.11419	0.96285	0.74569	0.78157	0.84488	0.90883	0.76459	1.52774	1.38539	1.38019	1.21915	1.483		15	1.07886	0.06819
-8.5	1.03247	0.94795	1.06326	1.1486	0.97577	0.84812	0.74826	0.73809	0.91298	0.86326	1.36056	1.22537	1.22813	1.1042	1.3414		15	1.03589	0.0513
-8	1.00205	0.94466	1.02434	1.10801	0.95134	0.85153	0.86016	0.84175	0.89505	0.72674	1.24801	1.16251	1.19002	1.05068	1.29408		15	1.01006	0.04263
-7.5	1.02338	0.99866	1.05601	1.02179	1.02346	0.57861	0.79527	0.87187	1.02769	0.84763	1.29432	1.15245	1.22713	1.04051	1.27481		15	1.01557	0.04877
-7	1.02993	0.97545	1.02327	1.22828	1.10546	0.81352	0.7585	0.75048	0.84524	0.7673	1.23264	1.11058	1.18471	1.01904	1.23495		15	1.00529	0.04651
-6.5	1.07555	0.96942	1.01816	1.01973	1.03201	0.77869	0.75259	0.97109	0.95977	0.78448	1.33436	1.29067	1.22076	1.074	1.33818		15	1.0413	0.04912
-6	1.02869	0.99064	0.99208	1.00327	0.97164	0.77733	0.77696	0.76717	0.82675	0.82271	1.45945	1.43094	1.36418	1.21936	1.36905		15	1.05335	0.06502
-5.5	1.03992	0.99256	1.00845	0.93893	0.99319	0.83287	0.77551	0.81554	0.67846	0.88599	1.65693	1.73592	1.48732	1.32634	1.55034		15	1.11455	0.08884
-5
-4.5
-4
-3.5
-3
-2.5
-2
-1.5
-1
-0.5
0	1.0289	1.00132	1.06576	0.94851	0.98079	0.97963	0.99267	1.01606	1.1101	1.00396	1.03742	1.08609	1.09477	1.10309	1.0401		15	1.03261	0.01293
0.5	1.03518	0.98571	0.98364	0.94635	0.98128	1.04194	1.05797	1.12476	1.21546	1.00174	1.03444	1.04424	1.02119	1.03006	1.03359		15	1.03584	0.01668
1	1.00224	1.02802	1.01431	0.95907	1.007	1.048	1.00217	1.09759	1.16046	0.96003	1.13779	1.17905	1.22249	1.17196	1.14933		15	1.07597	0.02265
1.5	0.97477	1.02829	1.01929	0.89245	1.0274	1.00132	0.86657	1.00087	1.09709	1.05158	1.22893	1.26288	1.25639	1.23899	1.202		15	1.07659	0.03389
2	0.99259	1.02665	0.96315	0.98223	1.00188	1.08281	0.94786	1.02777	1.00511	0.83609	1.20604	1.2239	1.19644	1.18799	1.18949		15	1.058	0.03021
2.5	0.99333	0.95776	1.0196	1.01757	0.97595	0.88477	1.05064	1.01941	1.22754	0.90634	1.08299	1.05043	1.10631	1.07681	1.0983		15	1.03118	0.02199
3	0.9625	0.97621	0.95782	0.84032	0.94317	1.02832	1.06463	1.23081	1.0681	1.02437	1.20953	1.2621	1.22202	1.19418	1.21865		15	1.08018	0.03429
3.5	0.96025	0.92872	0.94011	0.92685	0.90984	1.11258	0.93037	1.05411	1.13742	0.96506	1.0636	1.05262	1.0812	1.0454	1.0849		15	1.01287	0.02006
4	1.01884	1.0022	0.9499	0.99252	0.97657	1.17137	1.06597	1.09577	0.97761	0.87011	0.93262	0.92208	1.01527	0.99156	1.02632		15	1.00058	0.01894
4.5	0.99153	0.96999	0.96092	0.95826	0.99538	1.03059	1.03848	1.05174	1.04246	0.94554	0.93638	1.00287	1.02657	0.9739	1.03902		15	0.99757	0.01
5	0.98281	0.9397	0.92527	0.92888	0.96468	0.94809	1.11194	1.07166	1.10954	0.98872	0.93198	0.90359	0.93998	0.93422	0.94936		15	0.97536	0.01741
5.5	0.98435	0.951	0.94695	0.97911	0.98466	0.82346	1.02815	1.0548	1.05956	1.01475	0.86528	0.85269	0.9137	0.89757	0.94353		15	0.95331	0.01866
6	0.959	0.91502	0.95857	0.90627	0.93217	0.97029	0.96185	1.0693	1.11623	1.04714	0.80106	0.7762	0.87494	0.86148	0.88043		15	0.93533	0.02419
6.5	0.98547	0.97698	0.96486	1.07322	1.00036	1.21173	0.96802	1.04519	1.07535	1.05898	0.88858	0.94024	0.93895	0.93588	0.95496		15	1.00125	0.02073
7	1.01268	0.96257	0.98085	1.02122	1.02035	0.85853	0.95086	0.95697	1.00864	1.03013	0.96063	0.9754	0.98333	0.9688	0.95116		15	0.97614	0.01098
7.5	0.96346	1.00744	0.97827	1.05792	1.00334	1.08735	0.98118	1.03892	0.99879	1.11	0.96927	1.02714	1.00035	0.99217	1.01531		15	1.01539	0.01097
8	1.02153	0.99286	1.01698	1.04451	1.01364	1.11284	0.98667	0.98903	0.92056	1.01401	0.93889	0.91879	0.9336	0.92404	0.96664		15	0.98631	0.01403
8.5	1.00945	0.98326	1.04455	0.95447	0.99338	0.91479	1.02782	0.92199	1.08929	0.96905	1.00318	0.98926	0.99412	1.01221	0.98629		15	0.99287	0.01139
9	1.00557	1.01644	0.9602	0.9431	0.98964	0.88502	1.00433	1.05006	0.99136	0.90693	1.08866	1.06482	1.07193	1.07157	1.03176		15	1.00543	0.01583
9.5	0.99012	0.98893	0.98976	0.95501	1.03003	0.9708	1.0758	1.05982	1.05807	1.05498	0.90566	0.86126	0.91392	0.91459	0.9407		15	0.98063	0.01698
10	1.00913	0.99123	1.00492	0.91385	1.06136	0.93598	0.94919	0.99126	1.11846	0.96018	0.85267	0.79972	0.84417	0.84243	0.87995		15	0.94363	0.02304
10.5	1.06966	1.09472	1.10781	1.09692	1.23598	1.32829	0.97018	1.23583	1.10062	1.0714	1.14392	1.22599	1.21383	1.16467	1.1418		15	1.14677	0.02305
11	1.16744	1.23495	1.30245	1.56813	1.38827	1.47588	1.41413	1.68665	1.61442	1.15393	1.31589	1.39028	1.33989	1.27964	1.29823		15	1.37534	0.04026
11.5	1.32268	1.36547	1.549	1.80874	1.50134	2.01325	1.55272	2.03101	2.50581	1.36853	1.49193	1.45907	1.42166	1.33561	1.40102		15	1.60852	0.08708
12	1.39825	1.54604	1.70111	2.12098	1.82735	2.42119	1.83875	2.80779	3.07814	1.48597	1.51269	1.431	1.48567	1.33517	1.46395		15	1.83027	0.13986
12.5	1.59429	1.79211	2.06392	2.62022	2.09644	3.14652	2.16875	3.47532	3.88498	1.91799	1.73148	1.47589	1.56734	1.42203	1.65115		15	2.17389	0.19786
13	1.77953	2.1396	2.42776	3.23442	2.44714	3.48206	2.39414	4.53834	4.85998	2.03202	1.78119	1.48027	1.55715	1.39912	1.73236		15	2.48567	0.27911
13.5	1.88528	2.39769	2.68419	3.64212	2.62224	4.44957	2.82609	5.65418	5.52244	2.21039	1.76864	1.4652	1.60483	1.38544	1.77778		15	2.79307	0.36318
14	2.05203	2.59087	3.05217	3.90183	2.96755	4.84289	2.99933	6.2668	6.29509	2.54095	1.79319	1.42622	1.52448	1.34748	1.76634		15	3.02448	0.42187
14.5	2.23432	2.92122	3.34261	4.39836	3.15282	5.2579	3.45611	6.44128	6.82877	2.64404	1.72578	1.40713	1.53483	1.31297	1.79558		15	3.23025	0.45998
15	2.34783	3.20239	3.63568	4.86361	3.45283	5.65702	3.53073	6.83706	7.23627	2.87447	1.69347	1.35509	1.50363	1.32745	1.77413		15	3.41944	0.50184
15.5	2.52688	3.38558	4.01854	5.14295	3.55622	5.89921	3.89772	7.16636	8.24826	3.04648	1.70449	1.39377	1.50178	1.33524	1.76903		15	3.6395	0.5567
16	2.72898	3.6316	4.33926	5.55567	3.94364	5.92192	4.38248	7.4186	8.55003	3.09662	1.65441	1.32003	1.46011	1.24689	1.70652		15	3.79712	0.58835
16.5	2.87316	3.95093	4.72312	5.88836	4.27622	6.1076	4.5409	7.60966	8.95197	3.41475	1.6281	1.35323	1.43858	1.26509	1.68468		15	3.98042	0.61757
17	3.04907	4.21752	4.98984	6.27291	4.67366	6.38839	4.63035	7.65788	9.16659	3.3408	1.59586	1.27481	1.40027	1.24226	1.67933		15	4.1053	0.64347
17.5	3.22636	4.60121	5.36539	6.86504	4.82837	6.74488	4.87873	7.68923	9.4771	3.53796	1.57077	1.27576	1.41555	1.23146	1.66585		15	4.29158	0.67502
18	3.40301	4.91169	5.79675	7.25148	5.38073	7.07032	5.33333	7.83179	9.61888	3.66574	1.55561	1.26515	1.38562	1.20817	1.65607		15	4.48896	0.70528
18.5	3.65757	5.33479	6.07573	7.70116	5.52278	6.66112	5.33933	7.78525	9.7365	3.90564	1.5647	1.27204	1.37859	1.19225	1.64743		15	4.58499	0.71339
19	3.81178	5.45297	6.55285	8.40026	6.07549	7.3158	5.69765	7.75529	10.192	4.02573	1.50343	1.22478	1.34721	1.20525	1.62997		15	4.81269	0.76577
19.5	3.81617	5.58648	6.61715	8.39565	6.0916	7.02037	6.01449	8.10062	10.0749	4.03831	1.56405	1.23441	1.31803	1.15807	1.58234		15	4.84084	0.7687
20	3.94747	5.75838	6.85618	8.38563	6.23911	7.60063	5.75462	7.97464	10.0942	4.24566	1.4936	1.20755	1.30759	1.13078	1.5477		15	4.90292	0.78037
20.5	3.98891	5.91902	7.14201	8.65834	6.21124	7.18411	5.88406	8.22478	10.2115	4.38514	1.50333	1.17551	1.28891	1.11558	1.54164		15	4.96227	0.79417
21	4.10758	6.08502	7.2291	8.78616	6.49223	7.34204	6.17791	7.99206	9.93496	4.20499	1.44545	1.21588	1.27381	1.12585	1.53157		15	4.99631	0.7934
21.5	4.25968	6.22034	7.44212	9.02028	6.71028	7.79918	5.98584	7.76156	9.79857	4.11122	1.40622	1.16595	1.25436	1.10524	1.51108		15	5.03679	0.80565
22	4.40028	6.55675	7.69325	9.41932	6.92868	7.58751	6.34833	7.90315	9.87364	4.44504	1.42704	1.14998	1.21883	1.10018	1.50955		15	5.17077	0.82557
22.5	4.30135	6.54818	7.90519	9.45601	7.21479	7.77748	5.92487	7.73257	9.63133	4.25454	1.3994	1.16157	1.21936	1.0686	1.48243		15	5.13851	0.8271
23	4.45287	6.58628	7.98269	9.67726	7.17661	7.5749	6.02882	7.74846	9.89743	4.31015	1.35414	1.14701	1.20684	1.07638	1.44984		15	5.17798	0.83972
23.5	4.41342	6.70855	7.91303	9.33523	7.28291	7.57818	6.30501	7.75125	10.3672	4.35393	1.33922	1.12737	1.20151	1.07287	1.45639		15	5.21374	0.84802
24	4.48357	6.70064	8.12346	9.44152	7.23616	7.42781	6.29619	7.70888	9.97584	4.26652	1.33966	1.11298	1.13408	1.03327	1.43843		15	5.18127	0.84299
24.5	4.48614	6.72957	8.07802	9.41444	7.29376	7.79439	6.38381	7.71418	9.69246	4.52254	1.37581	1.11834	1.17194	1.05633	1.44249		15	5.21828	0.83713
25	4.53267	6.75178	8.07094	9.14878	7.33201	7.86377	6.45094	7.79305	9.79597	4.49739	1.32335	1.09548	1.17578	1.02315	1.4314		15	5.2191	0.83935
25.5	4.54193	6.9984	8.34479	9.62838	7.44135	7.61325	6.59037	7.50179	9.81734	4.51573	1.30691	1.08441	1.16902	1.0359	1.43577		15	5.26836	0.85305
26	4.53962	6.87182	8.24723	9.33157	7.26762	7.74393	6.45194	7.51016	9.79634	4.50982	1.28199	1.09784	1.1747	1.01644	1.39828		15	5.21595	0.84282
26.5	4.52001	6.85855	8.31006	9.28757	7.26838	7.44346	6.23871	7.34097	9.71383	4.58939	1.26442	1.02729	1.13202	1.00285	1.3993		15	5.15979	0.83609
27	4.57334	6.96713	8.41258	9.59548	7.48298	7.6029	6.46877	7.59377	9.3394	4.39031	1.2766	1.03793	1.0964	1.01633	1.37788		15	5.21545	0.84779
27.5	4.64198	7.02974	8.54432	9.66115	7.60504	7.84686	6.54123	7.64338	9.35557	4.47033	1.28372	1.03687	1.09926	1.01739	1.38901		15	5.27772	0.85779
28	4.65875	7.15299	8.62715	9.6468	7.87939	7.78808	6.50491	7.44285	9.39831	4.59708	1.2926	1.03914	1.07532	0.96568	1.38357		15	5.29684	0.86237
28.5	4.7788	7.14202	8.80341	9.7122	7.82393	7.5315	6.49758	7.47782	9.48527	4.60551	1.263	1.00282	1.05995	0.96487	1.33174		15	5.2987	0.86798
29	4.79633	7.29541	8.76792	9.65979	7.89841	7.59836	6.42479	7.28635	9.29481	4.70416	1.25452	1.0125	1.04935	0.95436	1.37839		15	5.2917	0.86163
29.5	4.79492	7.35954	8.85274	9.78437	7.98375	7.25576	6.59703	7.33902	9.30781	4.44001	1.23784	1.00244	1.04244	0.95311	1.34152		15	5.28615	0.86893
30	4.67839	7.31855	8.84789	9.85559	7.88105	7.17351	6.54789	7.23228	9.21546	4.53452	1.22272	0.99024	1.0501	0.9388	1.3357		15	5.25485	0.86505
30.5	4.19844	6.42645	7.88677	8.35598	6.77999	5.40372	5.09645	5.60443	7.36728	3.33873	1.19722	0.9546	1.02516	0.89522	1.32941		15	4.39066	0.70953
31	4.19283	6.12301	7.44526	8.04902	6.55516	4.05399	3.83858	4.41598	6.01226	2.45014	1.07191	0.91494	0.99731	0.89573	1.2374		15	3.88357	0.65525
31.5	3.90882	5.71716	6.94646	7.24173	5.85121	3.2878	3.00783	3.45901	4.64833	2.05953	1.09306	1.00264	1.02438	0.91866	1.23923		15	3.42706	0.57746
32	3.80355	5.36312	6.593	6.95075	5.53018	2.50874	2.53723	2.81127	3.74282	1.62855	0.99731	0.86539	0.93538	0.85908	1.15679		15	3.08554	0.55538
32.5	3.62738	5.05291	6.29714	6.44596	5.3097	2.51	2.26087	2.59652	3.22141	1.4873	0.99741	0.83757	0.94425	0.87463	1.14926		15	2.90749	0.51962
33	3.40019	4.65317	5.639	5.68539	4.77643	1.96077	2.06247	2.38219	2.77097	1.3959	0.92102	0.87706	0.95528	0.86889	1.12448		15	2.63155	0.4589
33.5	3.29213	4.23619	5.18531	5.04546	4.38867	1.81974	1.55106	2.09762	2.58106	1.17833	0.95056	0.91572	0.94882	0.87392	1.14725		15	2.41412	0.41322
34	3.07968	3.89869	4.78252	4.7167	3.95615	1.59647	1.59637	1.91868	2.39023	1.20022	1.06845	0.97168	1.04083	0.94108	1.27515		15	2.29553	0.36532
34.5	3.01542	3.64257	4.48153	4.26553	3.64612	1.48218	1.35865	1.81751	2.10109	1.13115	1.1091	0.99517	1.03725	0.93375	1.27878		15	2.15305	0.33269
35	2.81044	3.42335	4.10977	3.80475	3.34867	1.12394	1.18208	1.42577	1.72796	0.95944	1.10127	0.98974	1.02191	0.96501	1.30802		15	1.95347	0.30422
35.5	2.66181	3.16391	3.68955	3.47585	3.04383	1.18398	1.10428	1.31136	1.47004	0.97393	1.04671	0.93446	1.0055	0.91152	1.22566		15	1.81349	0.27156
36	2.54502	2.8573	3.35845	3.22278	3.01333	1.14437	1.09895	1.26259	1.40091	0.92586	1.02562	0.89034	0.99341	0.86224	1.19821		15	1.71996	0.24837
36.5	2.46567	2.63748	3.16715	2.99854	2.63324	0.96424	1.10711	1.2545	1.33996	0.91314	1.10283	0.9789	1.0329	0.93112	1.24039		15	1.65115	0.21934
37	2.42356	2.72012	3.17018	3.24038	2.68677	0.9713	0.91771	1.25604	1.23925	0.96106	0.95856	0.89301	0.95869	0.85881	1.15608		15	1.62743	0.2375
37.5	2.34668	2.56183	3.09554	2.97512	2.54195	1.07045	0.93637	1.13772	0.98616	0.78536	0.91004	0.85548	0.90471	0.82863	1.11338		15	1.53663	0.22634
38	2.18634	2.3651	2.81425	2.60804	2.3517	0.97837	0.89455	1.08518	1.06011	0.84319	0.95998	0.86735	1.01788	0.87469	1.1791		15	1.47239	0.19201
38.5	2.08555	2.2782	2.64726	2.47967	2.34416	0.94683	0.93736	1.01606	1.10397	0.73537	0.95754	0.88284	1.00166	0.89098	1.17038		15	1.43186	0.18085
39	2.14173	2.20183	2.62872	2.5666	2.26608	0.95566	0.81476	1.15263	1.04153	0.79571	0.95083	0.91199	1.00158	0.90164	1.15236		15	1.43224	0.17997
39.5	2.04036	2.07093	2.42199	2.3509	2.20903	0.83683	0.87923	1.02219	0.95865	0.81819	0.96046	0.90002	0.98133	0.89757	1.18972		15	1.36916	0.16372
40	1.98761	2.1628	2.40162	2.32978	2.12493	0.92034	0.95419	0.93091	0.82598	0.73374	1.0499	1.01839	1.06332	0.97952	1.282		15	1.38434	0.15903
40.5	1.92925	2.03327	2.24244	2.14089	2.10785	0.87871	0.92304	1.10121	0.88544	0.87084	0.97734	0.93227	1.02117	0.90855	1.1963		15	1.34324	0.14392
41	1.9181	2.05216	2.31799	2.24529	2.16131	0.9327	0.93187	0.8951	0.98541	0.80873	0.94418	0.85659	0.95136	0.85595	1.13059		15	1.33249	0.15506
41.5	1.83382	1.93835	2.17798	2.17027	2.04423	0.85626	0.83008	0.85259	0.70854	0.92468	1.08577	0.99751	1.06976	0.97417	1.28627		15	1.31669	0.14101
42	1.80936	1.86798	2.04888	2.03554	1.80245	0.80858	0.93637	0.85524	0.78565	0.66925	1.06821	0.99847	1.09475	0.98976	1.2807		15	1.27008	0.12799
42.5	1.75007	1.7432	1.91436	1.94442	1.7696	1.07121	0.8061	0.94833	0.85385	0.84644	0.97283	0.94205	1.01406	0.91743	1.20742		15	1.24676	0.11268
43	1.72934	1.75494	1.91154	1.88673	1.75584	0.78158	0.8669	0.84172	0.81594	0.79615	1.03705	0.95908	1.06956	0.94317	1.21788		15	1.2245	0.11462
43.5	1.69636	1.66667	1.80021	1.78694	1.67154	0.82018	0.7986	0.88646	0.86797	0.73655	1.08069	1.07206	1.11561	0.97427	1.31905		15	1.21954	0.10275
44	1.63765	1.64118	1.72354	1.76162	1.57887	0.9708	0.89055	0.93732	0.91833	0.79808	1.05305	1.0039	1.10825	0.97988	1.28527		15	1.21922	0.08987
44.5	1.64996	1.59434	1.81505	1.6625	1.62444	1.13251	0.93253	1.013	0.86612	0.88238	1.14294	1.03798	1.13285	0.97393	1.30664		15	1.25115	0.08482
45	1.6224	1.62197	1.75434	1.69839	1.57285	0.8381	0.82942	0.90011	0.7929	0.821	1.23472	1.11869	1.21111	1.05424	1.40182		15	1.23147	0.09191
45.5	1.59849	1.49767	1.61338	1.50096	1.43668	0.95692	0.78128	0.96756	0.85534	0.8	1.31793	1.23778	1.23467	1.10037	1.46277		15	1.22412	0.07619
46	1.49654	1.43736	1.51347	1.39914	1.33474	0.73895	0.84791	0.83713	0.82858	0.82766	1.34353	1.15873	1.2099	1.06808	1.51794		15	1.17064	0.07474
46.5	1.51561	1.48981	1.56897	1.39982	1.44823	0.78764	0.87056	0.81664	0.99489	0.76554	1.22835	1.08667	1.14438	1.01891	1.42374		15	1.17065	0.07446
47	1.53112	1.41607	1.55978	1.5577	1.47796	0.91126	0.79977	0.8388	0.81743	0.74321	1.26436	1.1243	1.19305	1.08012	1.43381		15	1.18325	0.07852
47.5	1.47882	1.51328	1.5241	1.50584	1.44318	0.69656	0.82309	0.93314	0.76391	0.84407	1.26897	1.1573	1.21164	1.05994	1.44829		15	1.17814	0.07862
48	1.57676	1.5033	1.51813	1.64734	1.40279	0.938	0.81309	0.91851	0.84159	0.76628	1.29596	1.15926	1.24215	1.10938	1.4741		15	1.21377	0.07818
48.5	1.57391	1.50542	1.55171	1.69419	1.55348	0.8661	0.86373	0.9167	0.66413	0.72753	1.23649	1.08989	1.17613	1.02904	1.40391		15	1.19016	0.08795
49	1.57993	1.47049	1.58935	1.5405	1.48986	0.74223	0.84724	0.84423	0.73381	0.66807	1.06896	0.97477	1.06292	0.95199	1.3013		15	1.12438	0.08736
49.5	1.45309	1.42218	1.47186	1.4705	1.27243	0.85475	0.75229	0.82207	0.75648	0.84703	1.1229	1.01273	1.09785	0.97868	1.27665		15	1.10743	0.06994
50	1.44389	1.35144	1.39769	1.36583	1.32928	0.77704	0.86807	0.96129	0.66357	0.90102	1.14952	1.06248	1.14468	1.02453	1.37601		15	1.12109	0.0648
50.5	1.48718	1.44003	1.38548	1.5596	1.36282	0.77099	0.85391	0.88283	0.77376	0.81302	1.17871	1.08001	1.14654	1.05589	1.37112		15	1.14413	0.07195
51	1.42062	1.3486	1.39582	1.45317	1.33522	0.84415	0.89722	0.75323	0.69832	0.80813	1.15128	1.04153	1.14393	1.0195	1.34502		15	1.11038	0.06826
51.5	1.40514	1.28643	1.31442	1.32237	1.16233	1.01217	0.85107	1.02191	0.82616	0.80547	1.11937	1.06394	1.14795	1.02431	1.37329		15	1.11576	0.05096
52	1.34419	1.22829	1.32493	1.23638	1.19387	0.97559	0.84325	0.86137	0.77804	0.77974	1.07835	1.04029	1.13326	1.01421	1.33204		15	1.07759	0.05152
52.5	1.32951	1.18708	1.2734	1.23869	1.19947	0.79874	0.83292	0.93718	0.77711	0.75016	1.02047	0.93287	1.03472	0.91121	1.2035		15	1.02847	0.05084
53	1.30333	1.1689	1.15388	1.07024	1.13377	0.90091	0.9247	0.78389	0.83936	0.76095	1.03024	0.94167	1.06332	0.93359	1.22465		15	1.01556	0.04207
53.5	1.29624	1.15668	1.17012	1.24505	1.11274	0.87821	0.7921	0.77344	0.88786	0.81006	1.03539	1.01642	1.09818	0.96988	1.25926		15	1.03344	0.04549
54	1.25022	1.15673	1.13244	1.12806	1.14366	0.78865	0.83642	0.91753	0.82152	0.70224	0.99246	0.96247	1.06727	0.94924	1.2523		15	1.00675	0.0443
54.5	1.24679	1.05323	1.13471	1.17342	1.07893	0.95364	0.85574	0.95363	0.85441	0.77427	0.97558	0.88486	1.02765	0.91279	1.15407		15	1.00225	0.03528
55	1.25984	1.12518	1.11227	1.08649	1.05313	0.61406	0.78411	0.84841	0.82877	0.86434	0.89203	0.85789	0.95152	0.8331	1.09345		15	0.94697	0.0437
55.5	1.19738	1.12556	1.14827	1.1374	1.08508	0.95415	0.87956	0.84256	0.72452	0.75445	0.87057	0.77054	0.87206	0.78729	1.06853		15	0.94786	0.04228
56	1.23788	1.10673	1.15663	1.23665	1.08819	0.96071	0.83625	0.91907	0.8401	0.84925	0.86966	0.82902	0.94414	0.82088	1.07153		15	0.98445	0.03918
56.5	1.22074	1.09439	1.11072	1.11723	1.06669	0.85777	0.83425	0.88339	0.8427	0.70475	0.9214	0.87537	0.95236	0.873	1.13147		15	0.96575	0.03787
57	1.15453	1.08964	1.10932	1.20754	1.04013	0.96323	0.8569	0.83838	0.77655	0.80976	0.88308	0.84489	0.95011	0.82972	1.09351		15	0.96315	0.03653
57.5	1.15805	1.05771	1.04841	1.15582	1.03211	0.86131	0.86823	0.80452	0.80442	0.76332	0.77591	0.72489	0.86468	0.74163	0.97277		15	0.90892	0.03856
58	1.19068	1.14789	1.05549	1.09164	1.0828	0.95061	0.81476	0.9599	0.88581	0.74173	0.85745	0.81564	0.9335	0.83841	1.05467		15	0.9614	0.0352
58.5	1.16956	1.00225	1.03074	1.14823	1.11254	0.91202	0.98567	0.95711	0.79755	0.7966	1.01962	0.99298	1.12801	0.94123	1.19089		15	1.01233	0.03169
59	1.1601	1.06874	0.98674	0.99915	0.99856	0.83002	0.92237	0.92492	0.78528	0.83712	0.91014	0.82238	0.9931	0.84697	1.0905		15	0.94507	0.02843
59.5	1.14472	1.03697	0.99752	0.96693	1.05576	0.9819	0.95669	0.84409	0.78101	0.82707	0.9987	1.00664	1.11896	0.98214	1.24877		15	0.99652	0.0314
60	1.22609	1.17589	1.13976	1.31465	1.14414	0.91101	0.99217	0.83545	0.8113	0.82381	1.12575	1.1538	1.21483	1.09086	1.41339		15	1.09153	0.04691
60.5	1.27115	1.18539	1.20994	1.24518	1.26531	1.0813	1.02132	0.90973	0.85441	0.88001	1.05848	1.04256	1.1746	0.99487	1.32432		15	1.10124	0.03906
61	1.27916	1.23703	1.30276	1.44951	1.28799	0.7889	0.95602	0.89245	0.75704	0.82219	0.99365	0.92057	1.06645	0.92366	1.23476		15	1.06081	0.05673
61.5	1.29147	1.28042	1.25319	1.44694	1.25936	0.85121	0.78344	0.93077	0.82951	0.83801	0.97927	1.00815	1.03652	0.94273	1.22669		15	1.06385	0.0543
62	1.2765	1.27764	1.30412	1.34755	1.29857	0.75358	0.84374	0.84479	0.62808	0.79231	1.12778	1.15083	1.17151	1.08145	1.35365		15	1.08347	0.06333
62.5	1.22061	1.18959	1.22144	1.34999	1.15721	0.82725	0.88922	0.87573	0.78658	0.78743	1.03217	0.97238	1.09585	0.97392	1.25793		15	1.04249	0.04782
63	1.22897	1.20493	1.20927	1.20158	1.17125	0.98089	0.8724	0.84228	0.77729	0.86493	0.95578	0.8921	1.00054	0.89061	1.19178		15	1.01897	0.04223
63.5	1.29839	1.24767	1.24376	1.28391	1.24235	0.93245	0.84624	0.8243	0.94658	0.83328	1.06757	1.08557	1.11831	0.98274	1.30618		15	1.08395	0.04645
64	1.29288	1.29581	1.30937	1.37003	1.29477	0.87442	0.87023	0.93872	0.79049	0.81375	1.05678	0.98355	1.07205	0.93484	1.23804		15	1.07572	0.05307
64.5	1.35213	1.32196	1.52008	1.60414	1.40694	0.90974	0.8734	0.78584	0.89009	0.78299	0.99874	0.87802	0.99573	0.88331	1.16623		15	1.09129	0.07201
65	1.32778	1.326	1.36722	1.49812	1.36628	1.06995	0.9282	0.94764	0.73084	0.74173	1.03542	0.98873	1.09085	0.95338	1.26456		15	1.10911	0.06118
65.5	1.37787	1.39636	1.43649	1.54132	1.42326	0.86156	0.86923	0.87628	0.72155	0.82766	1.12002	1.12802	1.19646	1.02394	1.36283		15	1.14419	0.06939
66	1.38338	1.42502	1.4929	1.64111	1.42561	0.94633	0.9252	0.91475	0.65521	0.86567	1.17298	1.12073	1.21264	1.06798	1.37375		15	1.17488	0.07207
66.5	1.41597	1.46459	1.45447	1.68742	1.40078	0.90218	0.85141	0.89245	0.86073	0.758	1.03614	0.9379	1.08813	0.94993	1.23083		15	1.12873	0.07464
67	1.38825	1.38064	1.42658	1.56677	1.37928	0.95591	0.96269	0.80967	0.72749	0.77131	1.04187	0.95978	1.08527	0.96636	1.2585		15	1.11202	0.06898
67.5	1.35774	1.28883	1.37764	1.62432	1.37319	1.0591	0.84624	1.00268	0.80368	0.8602	1.0419	0.97872	1.08811	0.97371	1.24769		15	1.12825	0.06147
68
68.5
69
69.5
70
70.5
71
71.5
72
72.5
73	0.94904	1.00887	0.94089	0.84412	0.93759	1.03043	1.02014	0.89137	0.9563	0.98518	1.0483	1.01809	0.98274	1.03692	1.06221		15	0.98081	0.01578
73.5	0.98213	1.0622	0.97077	0.94496	1.01211	0.93599	1.12804	0.92212	1.15241	0.95632	1.03176	1.04808	1.0033	1.0645	1.08399		15	1.01991	0.01806
74	1.02017	1.06615	1.01887	1.03036	1.0554	0.9979	1.07026	0.90802	0.86753	1.01821	1.00817	0.95257	0.95761	1.00606	1.0134		15	0.99938	0.0146
74.5	1.04924	1.04695	1.0614	0.86441	1.03968	1.18494	0.98314	0.89163	1.00772	0.99648	0.89547	0.87341	0.88808	0.93636	0.9148		15	0.97558	0.02355
75	1.0129	1.05468	1.01667	0.98734	0.99199	1.15609	0.96819	1.0188	1.09708	1.08757	1.02553	1.02602	0.96166	1.0342	1.03531		15	1.0316	0.01322
75.5	1.01652	1.00986	0.94974	0.85691	0.99131	0.90425	1.06461	1.00201	1.12797	1.10148	0.96972	0.97732	0.916	1.00111	0.97958		15	0.99123	0.01842
76	0.99632	1.0415	0.97546	0.93111	0.96622	1.05089	1.10143	0.93393	1.14928	1.1027	0.93102	0.90469	0.8998	0.91711	0.93067		15	0.98881	0.02093
76.5	1.00147	1.05463	1.00349	0.97794	0.95299	1.11962	0.95853	0.88532	1.05699	1.04915	0.91488	0.89829	0.93319	0.93028	0.93364		15	0.97803	0.01754
77	0.98313	0.93904	0.98352	0.853	0.92554	1.12461	1.0349	0.89701	1.15202	1.07853	0.89646	0.86433	0.86506	0.90055	0.94291		15	0.96271	0.02466
77.5	0.9429	1.02516	0.98693	0.85395	0.97603	1.03358	1.04949	1.02941	1.15828	1.12495	0.83343	0.84513	0.84593	0.86119	0.90897		15	0.96502	0.02723
78	0.99167	1.03274	0.97073	0.82118	0.932	0.95724	1.21352	0.84813	0.91074	1.02377	0.87754	0.85909	0.86407	0.89514	0.9217		15	0.94128	0.02548
78.5	1.00489	1.01473	0.91872	0.84919	0.92591	0.90609	1.06498	0.97153	1.0218	0.86818	0.91779	0.88125	0.88487	0.9201	0.96644		15	0.9411	0.01638
79	0.97011	0.97313	0.90881	0.80628	0.92554	1.22219	1.05568	0.93944	1.00264	1.05472	0.86713	0.88893	0.86351	0.92615	0.94001		15	0.95628	0.02593
79.5	0.95876	0.87839	0.89289	0.72024	0.9251	1.06322	1.16595	0.89163	1.08241	1.08897	0.89392	0.89049	0.89599	0.89907	0.90965		15	0.94378	0.02885
80	0.91835	0.92493	0.92426	0.8808	0.90517	1.13248	0.99389	0.95085	0.84485	0.86923	0.89125	0.90325	0.89582	0.91433	0.91098		15	0.92403	0.01734
80.5	0.96235	0.99912	0.95972	0.98153	0.99913	1.08998	1.02761	0.95515	0.97976	0.93807	0.85297	0.84551	0.87866	0.8898	0.88492		15	0.94962	0.01773
81	0.99704	0.9792	1.00555	0.99749	0.99273	1.12618	1.06607	1.04552	1.03646	1.0316	0.96398	0.94339	0.94875	0.93818	0.94117		15	1.00089	0.01374
81.5	1.02843	1.03611	1.04026	1.08416	1.07782	1.05929	0.91406	1.0286	0.90742	0.86957	1.03327	1.06834	1.04836	1.03671	1.05005		15	1.01883	0.01702
82	1.01218	0.98558	0.99447	0.93682	0.93032	0.72455	0.99225	0.97073	1.07635	1.16076	1.14978	1.14275	1.12423	1.13532	1.12386		15	1.03066	0.03051
82.5	0.96268	1.00482	1.00783	0.96145	0.93827	1.12566	1.11054	0.9953	1.0699	1.03525	0.96542	0.95416	0.96356	0.97323	0.99532		15	1.00422	0.01481
83	0.95681	1.01505	0.97041	0.98375	0.93752	1.25787	1.15757	0.94736	1.11155	1.0003	1.08749	1.05061	0.97494	1.02122	1.01477		15	1.03248	0.02282
83.5	1.13723	1.25805	1.23844	1.35275	1.25332	1.17314	1.25563	1.24319	1.42497	1.14199	1.28811	1.34826	1.23579	1.26083	1.245		15	1.25711	0.01981
84	1.25229	1.42231	1.44162	1.66551	1.52459	1.68783	1.4049	1.69666	1.98631	1.35686	1.43205	1.46881	1.3338	1.36253	1.37111		15	1.49381	0.04913
84.5	1.39734	1.68104	1.66808	2.01369	1.68141	2.23478	1.71512	2.18638	2.7774	1.70229	1.52341	1.58876	1.39887	1.44941	1.43736		15	1.76369	0.09953
85	1.55865	2.03071	1.99845	2.46482	1.93752	2.82057	2.58653	2.79294	3.49321	1.87631	1.66175	1.61467	1.47629	1.50273	1.55071		15	2.09106	0.15688
85.5	1.65896	2.21935	2.33565	2.78403	2.21109	3.27676	3.09341	3.53109	4.81416	2.09709	1.80184	1.6883	1.59601	1.55715	1.611		15	2.41839	0.23961
86	1.89725	2.54537	2.64961	3.32511	2.61825	4.00918	3.54087	4.40056	5.67758	2.5065	1.94349	1.78653	1.68064	1.63359	1.77513		15	2.79931	0.30531
86.5	2.02222	2.87678	3.01548	3.47213	2.76549	4.87093	3.87096	5.03733	6.82921	2.67565	1.95426	1.70778	1.69766	1.64145	1.84839		15	3.08572	0.39004
87	2.31745	3.25883	3.30596	4.09111	3.13414	5.28751	4.22018	5.41359	7.66233	2.88444	1.94672	1.70972	1.65151	1.58096	1.84246		15	3.35379	0.44828
87.5	2.43178	3.33193	3.56478	4.32112	3.41653	5.62644	4.79522	6.0231	7.96031	3.51828	2.06642	1.69121	1.67137	1.60203	1.93843		15	3.59726	0.48248
88	2.59281	3.78392	3.93097	4.66147	3.54695	6.22272	4.9106	6.50087	8.70838	3.49707	2.00667	1.66496	1.69031	1.5664	1.92239		15	3.81376	0.5416
88.5	2.65795	3.85696	4.16005	4.92043	3.75475	6.39953	5.25654	6.78233	8.91192	3.75975	2.01376	1.64748	1.65913	1.55828	1.92661		15	3.95103	0.56569
89	2.8072	4.02885	4.35073	4.87467	4.03503	6.73478	5.64896	6.71304	9.32271	4.00939	2.00504	1.65615	1.6341	1.53599	1.91028		15	4.08446	0.59203
89.5	2.91611	4.31725	4.56788	5.11894	4.24009	7.60519	5.94696	7.1606	9.57415	4.22878	2.06876	1.6751	1.64165	1.547	1.94883		15	4.30382	0.63375
90	3.00705	4.56913	5.02026	5.43583	4.56738	7.30115	5.88882	7.0662	9.97458	4.323	2.03825	1.62613	1.60259	1.50203	1.95583		15	4.39188	0.64641
90.5	3.1829	4.88187	5.26388	5.68052	4.78419	8.03568	6.38604	7.62414	10.1275	4.50867	2.04382	1.63165	1.56933	1.49276	1.93917		15	4.61014	0.68901
91	3.38208	5.04093	5.45498	6.04149	5.09794	8.64795	7.22774	7.62898	10.7129	5.14077	2.03428	1.58314	1.55034	1.44682	1.90778		15	4.85987	0.74329
91.5	3.50351	5.14615	5.74702	6.24348	5.1914	8.38615	7.15174	7.54102	10.1513	4.84767	1.97711	1.56694	1.54281	1.43465	1.84935		15	4.81869	0.71891
92	3.49466	5.26521	5.80259	6.25405	5.19867	7.84444	6.88289	7.56318	10.0411	5.22022	1.93988	1.57122	1.52242	1.39695	1.82498		15	4.78816	0.70327
92.5	3.72241	5.48534	6.28012	6.72029	5.63855	8.18625	7.03253	7.226	10.0583	5.08236	1.84783	1.49107	1.47571	1.37309	1.73925		15	4.8906	0.72369
93	3.87985	5.62407	6.37786	6.82039	5.80617	8.28332	6.96564	7.17457	10.0369	4.98031	1.86699	1.44952	1.49421	1.35337	1.81124		15	4.9283	0.7249
93.5	3.85105	5.73235	6.45236	6.81722	5.74115	8.44019	7.18236	7.20747	10.0684	5.20336	1.87432	1.49506	1.49433	1.37762	1.77958		15	4.98112	0.73306
94	3.98044	5.90195	6.82484	7.11762	5.89368	8.48846	7.23795	7.40486	9.99902	5.3925	1.83677	1.45957	1.43228	1.32053	1.76569		15	5.07041	0.74886
94.5	4.06469	6.07907	7.07176	7.36041	6.32983	8.81165	7.52356	7.60615	10.3539	5.45334	1.82641	1.46744	1.41482	1.32083	1.7147		15	5.22657	0.78435
95	4.04972	6.01339	6.96283	7.13738	6.26512	8.37251	7.31687	6.99906	10.1693	5.18875	1.80769	1.41821	1.39226	1.30696	1.72776		15	5.07519	0.75512
95.5	4.13317	6.25847	7.17138	7.37447	6.55043	8.24475	7.70437	7.31879	10.0913	5.57365	1.752	1.38762	1.35582	1.29403	1.72474		15	5.19567	0.77253
96	4.07735	6.34765	7.11986	7.24034	6.4692	8.04643	7.60685	7.12367	9.68423	5.55783	1.73034	1.35719	1.34033	1.25528	1.67108		15	5.10851	0.75423
96.5	4.07148	6.42304	7.15234	7.15926	6.47572	8.06322	7.52575	6.94427	9.82051	5.21518	1.76826	1.32794	1.31467	1.24932	1.6497		15	5.07738	0.75561
97	4.07761	6.24721	7.14299	7.15186	6.53043	8.29958	7.13205	6.78206	9.70359	5.09714	1.72931	1.2922	1.32072	1.2369	1.61576		15	5.02396	0.75056
97.5	4.10159	6.21676	7.21181	7.23484	6.58396	8.01679	7.30156	6.90614	9.3581	5.35199	1.68587	1.31309	1.29993	1.2369	1.6093		15	5.02857	0.7424
98	4.06467	6.28073	7.35151	7.06424	6.48168	8.01889	7.38777	7.02283	9.54561	5.11921	1.63963	1.29289	1.23565	1.21848	1.53925		15	5.01753	0.75455
98.5	4.12377	6.45494	7.38707	7.27226	6.79748	8.33631	7.14663	6.78461	9.30022	5.42553	1.64262	1.27909	1.26017	1.19473	1.58031		15	5.06572	0.75526
99	4.18173	6.42874	7.64142	7.52277	6.76723	8.20986	7.23849	6.97475	9.72275	5.25881	1.57194	1.30207	1.21273	1.17673	1.55335		15	5.11756	0.77711
99.5	4.10012	6.54573	7.54947	7.30788	6.68824	7.95147	7.36189	6.8253	9.48441	5.28072	1.55642	1.20034	1.18005	1.12529	1.55368		15	5.0474	0.76666
100	4.14027	6.44145	7.53455	7.23568	6.91094	8.22403	7.25308	6.64697	9.30687	5.25499	1.57264	1.21111	1.1817	1.14974	1.52317		15	5.03915	0.76301
100.5	4.11968	6.37764	7.61257	7.28198	6.98013	8.28332	7.47817	6.7407	9.39349	5.58112	1.53058	1.19048	1.18563	1.10178	1.48333		15	5.08937	0.77693
101	4.09238	6.40633	7.56006	6.89787	6.94088	8.08499	7.3422	6.78327	8.85482	5.36468	1.54532	1.18399	1.19109	1.11235	1.49766		15	4.99053	0.7505
101.5	4.20493	6.68291	7.83344	7.46801	7.23438	7.90871	7.27094	6.68471	9.17587	5.73202	1.52243	1.22254	1.14353	1.10475	1.48026		15	5.1113	0.77342
102	4.15649	6.64161	7.76871	7.15821	7.15644	7.83631	7.34093	6.47106	8.89491	5.37442	1.53271	1.1721	1.09454	1.08118	1.44348		15	5.00821	0.76005
102.5	4.19216	6.73909	7.88986	7.54169	7.25773	8.12487	7.40436	6.46368	9.01222	5.29741	1.49467	1.1308	1.06572	1.08381	1.44634		15	5.07629	0.78095
103	4.06834	6.48898	7.72871	7.09785	7.29655	7.82057	7.55381	6.55741	9.24665	5.42605	1.47571	1.13252	1.09777	1.06766	1.4379		15	5.0331	0.7748
103.5	3.85083	6.10283	7.18236	6.67653	6.47597	6.18337	5.72405	5.1132	7.52547	3.96506	1.43099	1.13058	1.06223	1.05095	1.39147		15	4.32439	0.6424
104	3.70744	5.49536	6.6791	6.03451	5.83213	5.02964	4.67475	4.43158	6.21899	3.28584	1.33483	1.08155	1.06762	1.03441	1.33291		15	3.81604	0.55098
104.5	3.50176	5.00804	6.08351	5.34397	5.27177	4.48452	4.23567	4.25715	5.73018	2.81472	1.31117	1.1019	1.08269	1.00563	1.30363		15	3.50242	0.49012
105	3.37315	4.57339	5.47463	4.85437	4.54975	3.85283	3.66664	3.32443	4.80555	2.20696	1.25355	1.0257	1.03066	0.96269	1.26276		15	3.08114	0.42337
105.5	3.286	4.40934	5.39156	4.78228	4.58105	2.85178	2.81017	2.72741	3.80721	1.93785	1.19097	1.037	0.9974	0.97332	1.24187		15	2.80168	0.39714
106	3.32448	4.30693	5.09888	4.78609	4.46367	2.56899	2.4101	2.51027	3.52996	1.70646	1.35122	1.13782	1.09007	1.0361	1.36011		15	2.71208	0.37426
106.5	3.09036	3.88752	4.67667	4.18719	4.03838	2.43075	2.31222	2.36672	3.37491	1.60685	1.33922	1.16526	1.11394	1.06663	1.35725		15	2.53426	0.32542
107	2.9613	3.65842	4.47757	4.00444	3.66147	2.32371	2.00601	2.27326	2.89647	1.41875	1.28786	1.05345	1.04678	1.04735	1.30812		15	2.36167	0.30588
107.5	2.79112	3.42361	4.13785	3.80488	3.40306	1.82581	1.71749	1.90761	2.55176	1.36086	1.1766	1.09044	1.06837	1.02957	1.27526		15	2.17095	0.28185
108	2.7483	3.26703	3.95676	3.6031	3.23935	1.72272	1.5899	1.87203	2.43074	1.21918	1.2404	1.05536	1.04079	1.03562	1.27278		15	2.08627	0.26631
108.5	2.7451	3.25888	3.85036	3.58936	3.21413	1.92025	1.49695	1.76581	2.07469	1.25238	1.22214	1.09228	1.07582	1.01998	1.23028		15	2.05389	0.26036
109	2.60973	3.05447	3.58773	3.3324	3.04875	1.59654	1.43461	1.92319	2.16659	1.22109	1.30793	1.13077	1.12902	1.05419	1.32943		15	1.9951	0.23237
109.5	2.52959	2.96047	3.4254	3.11624	2.87157	1.81637	1.39488	1.67463	1.9824	1.19032	1.31432	1.14135	1.09512	1.06698	1.33621		15	1.92772	0.21449
110	2.40538	2.75632	3.1663	2.98042	2.7681	1.37539	1.23995	1.46072	1.63711	1.13642	1.18323	1.06235	1.05208	1.02748	1.29232		15	1.76957	0.20562
110.5	2.3689	2.67777	3.00202	2.8688	2.50571	1.37277	1.1685	1.20008	1.415	0.95893	1.21952	1.1009	1.09007	1.03631	1.28113		15	1.68443	0.19467
111	2.28662	2.65852	2.92094	2.78815	2.48	1.09418	1.17306	1.18397	1.3798	0.89391	1.28901	1.14235	1.09959	1.06356	1.32325		15	1.65179	0.18976
111.5	2.26995	2.58423	2.84527	2.80855	2.39008	1.17602	1.06316	1.18316	1.32877	0.87879	1.2904	1.14775	1.12931	1.10752	1.3695		15	1.63816	0.18367
112	2.25478	2.51331	2.76174	2.56861	2.32139	0.95357	0.97239	1.04002	1.2621	0.87827	1.15961	1.09119	1.04305	1.02107	1.27304		15	1.54094	0.18237
112.5	2.11379	2.26558	2.50096	2.3385	2.07546	0.93337	1.07263	1.07842	1.21165	0.93737	1.09097	0.9894	1.02056	0.9482	1.16178		15	1.44924	0.15612
113	1.98802	2.08576	2.27408	1.98652	1.91846	0.98137	0.91789	1.04713	1.24567	0.86731	1.01763	0.89901	0.93158	0.92789	1.12968		15	1.34787	0.13635
113.5	1.94172	1.99144	2.21038	1.90439	1.90113	1.05247	1.07081	1.09628	1.11096	0.88035	1.00305	0.90594	0.89971	0.88752	1.11873		15	1.33166	0.12732
114	1.99868	2.03782	2.21461	2.03863	2.00168	1.00656	1.1182	0.93165	1.28243	0.82368	0.99941	0.94683	0.96089	0.97386	1.15344		15	1.36589	0.1342
114.5	1.94464	1.96031	2.23614	1.98874	1.97137	1.01863	0.82749	0.90547	0.87594	0.69694	1.00407	0.96012	0.93326	0.93707	1.10958		15	1.29132	0.14073
115	1.85532	1.90278	2.13392	1.92395	1.79034	0.89008	0.88745	0.87163	0.98426	0.82177	1.02586	0.9988	0.96951	1.01661	1.18596		15	1.28388	0.12367
115.5	1.77351	1.81754	1.98971	1.77354	1.78605	1.03253	0.88052	0.87915	0.88337	0.92051	1.09007	1.04699	1.03634	1.00787	1.18422		15	1.27346	0.10771
116	1.84043	1.90023	2.06866	1.94076	1.77183	0.86726	0.86904	0.87968	0.80027	0.95493	1.09028	0.99078	1.03253	0.99987	1.14155		15	1.27654	0.12175
116.5	1.85766	1.89899	2.04041	1.81814	1.81462	0.91842	0.8058	0.72956	0.91289	0.68912	0.98794	0.89358	0.92835	0.9061	1.09058		15	1.21948	0.12895
117	1.83262	1.88908	2.02538	1.87004	1.80493	1.00761	0.84389	0.92883	0.94809	0.80577	1.04126	0.97742	0.98759	0.97388	1.13651		15	1.27153	0.11803
117.5	1.84547	1.85987	1.96776	1.94604	1.71842	1.11044	0.87688	0.89231	0.86558	0.86975	1.17312	1.0788	1.04817	1.03273	1.21836		15	1.30025	0.1115
118	1.86144	1.96866	2.15183	2.16875	1.78847	0.95199	0.85227	0.79562	0.82589	0.83289	1.18598	1.15396	1.10398	1.09713	1.30297		15	1.33612	0.13083
118.5	1.80048	1.79886	2.38347	1.97046	1.85312	0.98478	0.78575	0.78354	0.67162	0.77674	1.22349	1.09924	1.14715	1.13967	1.30567		15	1.31494	0.13487
119	1.79502	1.78179	3.52691	1.87078	2.15098	0.8224	0.85136	0.73909	0.76645	0.85984	1.15744	0.98269	1.03263	1.03095	1.21321		15	1.3721	0.19399
119.5	1.79719	1.8	4.37169	1.90936	2.54658	0.92156	0.86029	0.79764	0.76312	0.78282	1.02946	0.93397	0.93692	0.9554	1.11599		15	1.4348	0.25092
120	1.79349	1.85468	4.94384	1.98948	2.86654	0.80404	0.69844	0.93125	0.95611	0.78404	1.02025	0.92052	0.99539	0.97543	1.09932		15	1.50885	0.29026
120.5	1.6936	1.74189	5.44645	1.77301	3.02006	0.99344	0.9753	0.88143	0.88102	0.83463	1.05256	1.00114	1.02275	0.97887	1.17205		15	1.56455	0.31464
121	1.66686	1.7062	5.60853	1.69754	3.31127	0.90136	1.05878	0.8347	0.87105	0.74684	1.16264	1.0896	1.12916	1.08371	1.24365		15	1.60746	0.32888
121.5	1.72014	1.77639	6.1583	1.8099	3.72606	1.01574	0.84261	0.86505	0.77114	0.78439	1.11325	0.983	1.07517	0.99939	1.17558		15	1.65441	0.37534
122	1.74138	1.74433	6.15069	1.79172	3.88144	0.88195	0.89419	0.79777	0.83273	0.93581	0.99801	0.9198	0.96713	0.99228	1.13918		15	1.64456	0.38083
122.5	1.68489	1.72555	5.94644	1.72777	3.94982	0.90818	0.93867	0.87176	0.82452	0.76631	0.96595	0.82332	0.91561	0.89032	1.04774		15	1.59912	0.37466
123	1.60595	1.57691	5.61624	1.62144	3.79164	1.00603	0.91716	0.78179	0.83195	0.76996	1.02733	0.94108	1.00867	0.97512	1.12454		15	1.57305	0.34791
123.5	1.63377	1.67154	5.39565	1.78686	3.81735	0.90504	0.9846	0.87915	0.67006	0.80369	1.05784	1.04337	1.04283	1.00211	1.17308		15	1.59113	0.33593
124	1.6195	1.63601	5.16916	1.70135	3.66346	0.96249	0.93247	0.83604	0.96705	0.79013	1.08716	1.04181	1.08124	1.04017	1.18514		15	1.58088	0.3149
124.5	1.6914	1.73302	5.3825	1.86317	4.03391	0.86149	0.94614	0.6886	0.79245	0.76839	0.98548	0.90481	0.96098	0.92995	1.08207		15	1.57496	0.34813
125	1.72301	1.77863	5.21804	1.83749	3.8712	1.04145	0.86412	0.83806	0.77192	0.71954	0.86533	0.82772	0.87739	0.83158	0.97014		15	1.53571	0.33687
125.5	1.69455	1.7061	5.01951	1.90788	3.6901	0.8127	1.00775	0.77212	0.89999	0.78891	0.79629	0.7219	0.84896	0.76122	0.91849		15	1.48976	0.32328
126	1.69788	1.70407	4.87719	1.82121	3.67153	0.93206	0.8417	0.82275	0.81611	0.86836	0.87733	0.86258	0.87953	0.88726	1.0216		15	1.50541	0.30991
126.5	1.70534	1.71844	4.8471	1.87512	3.64079	0.75551	0.87342	0.89325	0.72324	0.83845	1.01661	1.01197	1.02901	1.00566	1.11789		15	1.53679	0.30423
127	1.69276	1.72913	4.70456	1.82903	3.61427	1.08814	0.87852	0.80422	0.61355	0.90556	0.96067	0.9148	0.97538	0.93436	1.08147		15	1.5151	0.29694
127.5	1.64388	1.61826	4.3831	1.59269	3.44901	1.22455	0.98405	0.79159	0.74944	0.80403	0.91615	0.81985	0.89126	0.82346	0.9978		15	1.44594	0.27504
128	1.58213	1.61245	4.09891	1.56985	3.31847	1.17838	0.82475	0.7732	0.82667	0.81273	0.9836	0.93082	0.9931	0.94317	1.10425		15	1.43683	0.25216
128.5	1.5038	1.47907	4.00799	1.40908	3.03465	1.04486	0.88217	0.75601	0.85502	0.783	0.9714	0.93465	0.97885	0.96845	1.12794		15	1.38246	0.23715
129	1.49531	1.41525	3.93356	1.29873	2.89983	1.18678	0.82275	0.85847	0.82432	0.81116	0.91046	0.85019	0.9393	0.898	1.09742		15	1.34944	0.22988
129.5	1.52548	1.43642	3.97282	1.46352	3.02143	0.91264	0.85792	0.82543	0.71542	0.95441	0.86308	0.87479	0.95263	0.88985	1.07088		15	1.35578	0.23807
130	1.4548	1.43398	3.80165	1.36025	2.89678	0.9394	1.00866	0.77561	0.9041	0.82611	0.9318	0.91811	1.01112	0.94124	1.10433		15	1.35386	0.22053
130.5	1.46037	1.36374	3.79312	1.35	2.84052	0.96013	0.91588	0.83282	0.85756	0.83202	1.01939	1.0341	1.04402	1.01902	1.18584		15	1.36723	0.21554
131	1.42199	1.37281	3.57874	1.2962	2.78096	1.02492	0.7544	0.85806	0.87692	0.80421	1.11227	1.07649	1.11462	1.07233	1.26218		15	1.36047	0.20139
131.5	1.37553	1.31777	3.52879	1.32283	2.74916	0.97298	0.96109	0.79361	0.68452	0.79951	1.00227	1.0209	1.06839	0.98295	1.17733		15	1.31718	0.20134
132	1.49952	1.42802	3.91409	1.64543	3.0308	1.09969	0.83551	0.82328	0.81748	1.02203	0.96673	0.93871	0.98267	0.93778	1.10223		15	1.40293	0.23044
132.5	1.45447	1.42075	3.7518	1.4112	2.89803	0.99869	0.95307	0.73909	0.79597	0.87357	0.89408	0.83202	0.90786	0.84637	1.02954		15	1.32043	0.22241
133	1.47862	1.50039	3.94721	1.59311	2.98404	0.99265	0.93903	0.81254	0.81337	0.90869	0.8017	0.78595	0.82512	0.80447	0.97837		15	1.34435	0.23816
133.5	1.50066	1.50049	3.97712	1.6857	2.92448	1.04853	0.86631	0.82369	0.79011	0.84471	0.86013	0.87042	0.90264	0.88313	1.05174		15	1.36866	0.23585
134	1.47954	1.45385	3.78225	1.58582	2.86362	0.86097	0.76825	0.86612	0.76371	0.9186	0.88114	0.85615	0.90609	0.88849	1.05876		15	1.32889	0.22449
134.5	1.46329	1.51398	3.63495	1.64004	2.82002	0.9979	0.93867	0.7642	0.8603	0.76527	0.88569	0.88865	0.93219	0.89532	1.08242		15	1.33886	0.21385
135	1.39932	1.39569	3.31942	1.42494	2.60402	0.77754	0.89146	0.8343	0.71933	0.91338	0.83781	0.82132	0.90201	0.8624	1.04865		15	1.25011	0.19242
135.5	1.37002	1.35549	3.13134	1.31121	2.51168	1.01889	0.90313	0.81509	0.7991	0.94467	0.90796	0.89757	0.91214	0.87947	1.05865		15	1.25443	0.17388
136	1.32633	1.2938	2.94329	1.27474	2.40157	0.78778	0.87688	0.78287	0.68452	0.9146	1.03454	1.00398	1.02236	1.00565	1.22481		15	1.23851	0.16069
136.5	1.43897	1.35798	3.01662	1.47536	2.45057	0.91291	0.88344	0.89513	0.66693	0.86662	1.1042	1.06369	1.10568	1.0513	1.26777		15	1.30381	0.16322
137	1.33421	1.2703	2.81713	1.2294	2.37163	0.9373	1.00519	0.74621	0.79695	0.80299	1.1042	1.04649	1.11455	1.02168	1.23512		15	1.25556	0.14915
137.5	1.31289	1.31813	2.94915	1.21354	2.34965	0.92078	0.97512	0.87485	0.81279	0.95997	1.03565	1.01993	1.04681	0.96461	1.17669		15	1.26204	0.15324
138	1.39431	1.36503	3.10341	1.48202	2.49839	1.07135	1.0165	0.79428	0.84309	0.91147	1.0243	0.98241	1.01724	0.9529	1.19292		15	1.30997	0.16719
138.5	1.38846	1.38843	3.00603	1.46468	2.46659	0.99292	0.94887	0.7599	0.98426	0.89443	0.88818	0.82366	0.86436	0.84699	1.05465		15	1.2515	0.16767
139	1.31885	1.28415	2.91359	1.33953	2.26674	0.83526	1.05532	0.8637	0.76684	0.85984	0.84301	0.7858	0.83343	0.77897	0.99946		15	1.18297	0.15934
139.5	1.34166	1.31471	2.75513	1.36416	2.2504	0.84601	0.81728	0.78206	0.73986	0.90121	0.84473	0.83168	0.85712	0.82345	0.98953		15	1.16393	0.15237
140	1.39439	1.40275	2.9105	1.56943	2.30841	0.9352	0.99863	0.84262	0.78815	0.84889	0.91988	0.89782	0.90483	0.8668	1.06608		15	1.24363	0.15824
140.5	1.30521	1.28208	2.68255	1.4779	2.21451	1.02964	1.04055	0.79938	0.91309	0.95006	1.03225	0.99771	0.91481	0.93037	1.1387		15	1.24725	0.13584
141
141.5
142
142.5
143
143.5
144
144.5
145
145.5
146	1.00024	1.03453	1.37903	1.04055	1.27668	0.99054	0.9614	0.88874	0.92721	1.20192	0.98604	0.86787	0.95319	0.98785	0.98819		15	1.03227	0.03701
146.5	1.03302	1.05778	1.39316	1.06569	1.26764	0.95913	0.92252	0.79538	0.9128	0.9711	1.14632	1.13686	1.09697	1.12406	1.12486		15	1.06715	0.03816
147	1.01147	1.02118	1.31334	1.07838	1.16656	1.03742	0.94088	0.91284	0.8414	0.96316	1.17648	1.26109	1.10746	1.21097	1.16101		15	1.08024	0.03494
147.5	1.00696	1.01297	1.32687	1.05495	1.22494	0.80733	0.89049	0.91313	1.05746	0.94095	1.17436	1.2801	1.22539	1.23113	1.21966		15	1.09111	0.04146
148	1.00104	0.98865	1.33828	1.04787	1.15196	1.08191	0.99721	0.95873	1.04059	1.01611	1.18259	1.14481	1.15334	1.19655	1.15006		15	1.09665	0.02665
148.5	1.01681	0.96295	1.29672	1.0292	1.1603	0.79519	0.89283	1.04185	0.97289	1.1347	1.06766	1.03294	1.09101	1.08637	1.03104		15	1.04083	0.02989
149	0.98184	0.93336	1.25268	0.90276	1.124	0.78044	0.97417	1.11919	0.87391	0.92549	1.1308	1.06124	1.12435	1.10524	1.06188		15	1.02342	0.03244
149.5	1.01642	0.98559	1.26618	0.97855	1.0966	0.85706	0.84208	0.98182	0.95149	1.14739	1.22191	1.23955	1.17722	1.15384	1.1362		15	1.07013	0.03501
150	1.04321	1.03238	1.29919	1.04372	1.09099	0.93605	1.0512	1.04141	0.96939	1.01334	1.13417	1.12939	1.14828	1.12156	1.14989		15	1.08028	0.02283
150.5	1.01242	0.93216	1.21648	0.80232	1.08911	0.86039	0.94502	0.89307	0.89696	0.98656	1.11522	1.07813	1.10486	1.08914	1.12632		15	1.00988	0.03057
151	0.95847	0.95624	1.15442	0.89336	1.06261	1.08762	0.80014	0.91703	0.98524	1.19835	1.03985	1.05118	1.07291	1.04139	1.08537		15	1.02028	0.02665
151.5	0.97843	0.95121	1.12946	0.91411	1.07781	0.79448	0.96644	0.90375	1.07763	1.10158	1.04972	0.97545	0.98729	1.00804	1.01881		15	0.99561	0.0224
152	0.99658	0.96852	1.12944	0.99649	1.0434	0.97841	0.97183	0.86522	0.85581	1.06093	1.06712	1.05001	0.99168	1.04192	1.0462		15	1.00424	0.01881
152.5	0.94523	0.92299	1.0803	0.93022	0.98384	0.84897	1.01863	0.96667	1.07187	1.11526	1.0498	1.07784	1.05365	1.0588	1.05854		15	1.01217	0.01943
153	0.98633	0.99566	1.09634	1.03225	1.0216	0.78282	0.96626	0.88874	1.00849	1.11586	1.1113	1.13427	1.06901	1.11458	1.07795		15	1.02676	0.02477
153.5	0.9722	0.97116	0.96945	0.86505	1.0176	1.01362	0.95906	1.07316	0.97536	0.98815	1.06759	1.09426	1.09209	1.09094	1.05941		15	1.01394	0.01688
154	0.98062	0.966	0.98779	0.94535	0.98455	0.95176	1.05192	0.96508	0.9377	1.06172	0.90676	0.93931	0.93105	0.95173	0.97397		15	0.96902	0.01082
154.5	1.03829	1.02375	1.03922	1.12061	1.01124	1.03385	0.99433	1.02035	1.07989	1.0528	1.00875	0.9482	0.95511	0.95204	0.97522		15	1.01691	0.01242
155	1.00888	1.03909	1.00354	1.06899	0.98662	1.00077	0.99469	0.94141	1.00705	0.89733	1.0169	1.01823	1.02174	1.00529	0.99141		15	1.00013	0.01019
155.5	1.00079	1.03711	0.92758	1.07765	0.97899	0.81566	0.96644	0.90346	1.08133	0.99212	1.09837	0.9984	1.0458	1.04652	1.02215		15	0.99949	0.01935
156	1.02624	1.01087	0.96589	1.17175	0.95879	0.90417	1.01035	1.06898	1.00869	1.13014	1.08654	1.17747	1.13963	1.1424	1.13031		15	1.06215	0.02204
156.5	1.16462	1.2409	1.10938	1.46563	1.24382	1.05407	1.13147	1.27576	1.29863	1.11586	1.46499	1.57786	1.37881	1.42079	1.30621		15	1.28325	0.03983
157	1.26452	1.31159	1.21063	1.83384	1.32946	1.56802	1.31198	1.74589	1.87931	1.42898	1.72789	1.90735	1.61472	1.59722	1.49488		15	1.54842	0.06055
157.5	1.41102	1.54306	1.34577	2.20961	1.42687	1.92802	1.77306	2.26176	2.53737	1.79763	1.97881	2.21553	1.89714	1.84816	1.74814		15	1.86146	0.0891
158	1.56753	1.76907	1.5605	2.43198	1.62564	2.38629	2.05687	2.80967	3.55594	2.12444	2.48855	2.59091	2.23244	2.18648	2.00172		15	2.22587	0.13656
158.5	1.74017	2.04954	1.76667	2.98056	1.82441	3.16222	2.43805	3.89726	4.6309	2.29974	2.70147	2.92916	2.48349	2.4188	2.24386		15	2.63775	0.20694
159	1.90278	2.23925	1.96783	3.43213	1.98948	3.49652	3.02403	4.49293	5.27558	2.93213	3.04491	3.07463	2.69597	2.57744	2.54052		15	2.97908	0.24101
159.5	2.06591	2.52152	2.13512	3.74615	2.12992	4.19559	3.6262	5.40173	6.70467	3.08839	3.17409	3.06639	2.6612	2.57522	2.61141		15	3.31357	0.33446
160	2.2309	2.84787	2.23921	4.22749	2.2681	4.93034	4.21992	6.14892	7.62323	3.38426	3.33131	3.0924	2.80974	2.72708	2.78874		15	3.65797	0.4004
160.5	2.44956	3.06197	2.50479	4.70542	2.45675	5.29844	4.51435	6.60188	8.28355	3.5909	3.42563	3.29778	2.8674	2.78435	2.94816		15	3.9194	0.43768
161	2.56326	3.34777	2.69891	5.01223	2.61376	5.81833	4.89841	6.88442	9.08771	3.81776	3.44036	3.14501	2.80319	2.62312	2.97852		15	4.11552	0.49133
161.5	2.73145	3.6153	2.83251	5.36641	2.71809	5.71578	4.86205	7.13795	9.27805	4.30658	3.47067	3.26783	2.84428	2.63902	3.03744		15	4.25489	0.49796
162	2.9888	3.83269	3.04167	5.99591	2.94884	6.38011	5.18096	7.43925	9.37168	4.10213	3.28266	2.99801	2.67419	2.5045	2.88273		15	4.37494	0.53213
162.5	3.05288	4.01138	3.16193	6.22914	2.99417	6.38891	5.48475	7.69192	9.53465	4.61355	3.51219	3.1263	2.77488	2.59446	3.03201		15	4.54688	0.53922
163	3.15419	4.261	3.31392	6.52558	3.17087	6.60115	5.89364	7.85786	10.0195	4.69188	3.62711	3.13607	2.81153	2.59819	3.05889		15	4.71476	0.56801
163.5	3.3809	4.59137	3.47033	6.76748	3.27383	6.97258	6.23954	7.92799	10.0124	4.84736	3.61458	3.11124	2.81758	2.62354	3.09297		15	4.84958	0.5756
164	3.44565	4.67727	3.57389	7.24491	3.37811	7.12605	6.55143	8.12006	10.1398	4.92866	3.54744	2.96065	2.70287	2.55212	2.97621		15	4.92834	0.605
164.5	3.5177	4.79276	3.574	7.14838	3.45034	7.4268	6.54315	7.92626	10.0413	5.01631	3.44983	2.967	2.67025	2.48383	3.02255		15	4.93536	0.60032
165	3.63478	5.13122	3.70775	7.36403	3.59318	7.13033	6.67902	7.64459	10.0853	5.4855	3.44498	3.01702	2.62876	2.44838	2.98337		15	4.99855	0.59408
165.5	3.83602	5.47435	3.82704	7.76226	3.72689	7.14318	6.76721	7.47792	10.1845	5.71038	3.506	3.03985	2.68732	2.4838	3.00213		15	5.10859	0.59767
166	3.86449	5.52526	3.94266	7.80034	3.83979	7.26429	6.70332	7.59437	10.2748	5.61955	3.45594	2.90574	2.6336	2.41638	2.95637		15	5.11979	0.60884
166.5	3.96042	5.79441	4.02838	8.29047	3.93211	7.33853	7.08342	7.93752	10.675	5.92157	3.32747	2.92198	2.50285	2.40298	2.88242		15	5.26664	0.65331
167	4.04348	5.79255	4.11557	8.36845	3.98446	7.34257	7.32134	8.10346	10.3946	5.77483	3.41333	2.89839	2.61451	2.42194	2.93461		15	5.3016	0.64397
167.5	4.00577	5.89924	4.07324	7.97034	3.95687	7.40634	6.98209	7.68586	10.2059	5.71989	3.49049	2.87273	2.48721	2.34232	2.91086		15	5.20061	0.6213
168	4.10366	5.89445	4.20257	8.45657	4.0258	7.22503	7.41906	7.6404	10.075	5.77978	3.3375	2.75445	2.46987	2.25656	2.8062		15	5.22979	0.63632
168.5	4.08883	6.09519	4.27305	8.32793	3.99327	7.30474	7.15216	7.71053	10.1172	5.74468	3.31455	2.69819	2.48457	2.29218	2.80613		15	5.22688	0.6344
169	4.07098	6.013	4.24576	8.24311	4.06356	7.38516	7.14766	7.54545	10.2546	5.6144	3.35395	2.6989	2.45912	2.22305	2.76328		15	5.20547	0.63682
169.5	4.11781	6.09069	4.20467	8.17159	4.05758	7.35875	7.10501	7.54141	10.0625	5.47737	3.29543	2.67953	2.39487	2.32112	2.7317		15	5.174	0.62793
170	4.1176	6.3136	4.32493	8.45596	4.17034	7.05824	7.03176	7.43377	9.77355	5.86922	3.2713	2.7046	2.38689	2.22897	2.74416		15	5.19233	0.61998
170.5	4.15843	6.25776	4.37047	8.5459	4.20188	7.24383	7.20795	7.20563	9.7112	5.68559	3.05055	2.62904	2.35198	2.16486	2.72444		15	5.1673	0.62704
171	4.10756	6.32959	4.335	8.11973	4.1774	7.35352	7.56519	7.44416	9.70173	5.81687	3.15505	2.6404	2.32389	2.16284	2.65651		15	5.19263	0.63019
171.5	4.02719	6.21565	4.29592	8.08726	4.23281	7.26762	7.37533	7.30649	9.80935	5.71633	2.98059	2.515	2.25744	2.13356	2.70194		15	5.12817	0.63175
172	4.18385	6.35253	4.44815	8.0559	4.29096	7.29165	7.35733	7.25065	9.75832	5.77145	3.04287	2.57149	2.27442	2.11715	2.63759		15	5.16029	0.62646
172.5	4.23099	6.69015	4.48987	8.44375	4.45988	7.40872	7.22397	7.19048	9.7719	6.01676	3.05486	2.52895	2.22168	2.10459	2.60593		15	5.2295	0.64048
173	4.1962	6.60856	4.51428	8.227	4.39387	7.46892	7.40538	7.10765	9.33134	5.80814	3.00323	2.49593	2.22245	2.08336	2.6655		15	5.16879	0.62293
173.5	4.05721	6.44023	4.35743	8.08262	4.32462	7.53602	7.42032	7.09654	9.44987	6.14486	3.01757	2.39107	2.17836	2.0443	2.60079		15	5.14279	0.63252
174	4.0585	6.4355	4.39778	8.06224	4.3313	7.30569	7.59993	6.93405	9.4972	6.36795	2.91165	2.39372	2.16281	2.03888	2.56423		15	5.13743	0.63497
174.5	4.12801	6.56992	4.51412	8.20308	4.55263	7.47082	7.49105	7.12857	9.369	6.33623	2.97119	2.41808	2.16187	1.97727	2.53289		15	5.18831	0.63683
175	4.07229	6.47432	4.36898	7.89687	4.33446	7.51579	7.46171	7.08066	9.2904	6.44053	2.89317	2.46721	2.1426	2.0008	2.4853		15	5.12834	0.63079
175.5	4.0516	6.48462	4.36049	8.10947	4.37485	7.20385	7.36129	7.02641	9.10355	6.13574	2.85807	2.41302	2.05065	1.91695	2.43623		15	5.05912	0.62581
176	3.95222	6.32629	4.34225	7.81962	4.30871	7.06109	7.19698	6.66739	8.55744	5.69749	2.82533	2.31156	2.07637	1.95122	2.4223		15	4.90108	0.58964
176.5	3.68455	5.85539	3.90826	6.83143	3.85179	5.49973	5.47071	5.44372	7.49771	4.31689	2.66599	2.23189	1.97363	1.88652	2.3323		15	4.23003	0.46745
177	3.61003	5.60542	3.75064	6.66801	3.58249	4.48444	4.30685	4.62121	6.15155	3.48243	2.44547	2.10984	1.93451	1.80682	2.2005		15	3.78401	0.39821
177.5	3.42967	4.88621	3.36044	6.08452	3.30203	3.86414	3.88734	4.24141	5.54987	2.9823	2.25142	1.95507	1.85592	1.76492	2.04063		15	3.43039	0.34972
178	3.19361	4.623	3.12146	5.29721	2.89921	2.88954	2.77837	3.35599	4.47369	2.3975	2.20975	1.95024	1.78575	1.81103	2.04923		15	2.98904	0.27786
178.5	3.07543	4.26376	2.92751	5.09852	2.73697	2.36226	2.55233	2.72107	3.48043	1.91463	2.19353	2.01239	1.82344	1.74268	1.98968		15	2.72631	0.24556
179	3.04174	4.16959	2.85132	4.90874	2.6075	2.1455	1.98254	2.31746	2.86764	1.74528	2.02213	1.9217	1.73853	1.68659	1.92012		15	2.52843	0.2418
179.5	2.84886	3.74427	2.5895	4.43789	2.35581	1.96895	2.01944	2.06623	2.95262	1.60944	1.82127	1.71639	1.58296	1.59102	1.75984		15	2.33763	0.21874
180	2.71842	3.45027	2.40405	4.06005	2.22544	1.6256	1.69783	2.08413	2.54169	1.45119	1.86616	1.89834	1.6494	1.64531	1.8289		15	2.20979	0.18969
180.5	2.71341	3.42852	2.3644	4.00476	2.12356	1.76789	1.6352	2.26407	2.50116	1.41193	1.86843	1.83014	1.64062	1.62815	1.7883		15	2.19804	0.18696
181	2.54693	3.25941	2.14639	3.56625	1.96956	1.46642	1.42194	1.88889	2.05525	1.24436	1.97105	1.98426	1.82263	1.756	1.88102		15	2.06536	0.16342
181.5	2.47675	2.9182	1.98684	3.41248	1.82248	1.01648	1.30118	1.78398	1.85853	1.13212	2.03067	2.05282	1.77751	1.79095	1.96747		15	1.95523	0.16096
182	2.47702	2.94438	1.98498	3.3052	1.84946	1.07691	1.14011	1.48874	1.71058	1.17416	2.05558	1.95401	1.83011	1.76425	1.93312		15	1.91258	0.16101
182.5	2.333	2.77258	1.79501	3.11799	1.70751	1.19826	1.12697	1.32266	1.52271	1.09028	2.14073	1.9629	1.7914	1.78273	1.93859		15	1.84022	0.15019
183	2.25269	2.63031	1.68983	2.97019	1.52239	1.19231	0.98569	1.31429	1.4332	1.10575	1.90502	1.77259	1.72083	1.70505	1.79782		15	1.7332	0.14138
183.5	2.10893	2.38183	1.55348	2.5024	1.4319	0.80804	1.04256	1.36263	1.38258	0.89753	1.76604	1.70056	1.58197	1.62181	1.78583		15	1.59521	0.12579
184	2.02475	2.32288	1.46773	2.52571	1.37786	1.03837	1.06866	1.35108	1.46695	1.01572	1.71857	1.61211	1.53429	1.55381	1.66136		15	1.58266	0.11266
184.5	2.02337	2.16527	1.48593	2.39109	1.37263	1.07929	0.99001	1.13766	1.33711	0.96178	1.73808	1.74528	1.60666	1.58998	1.7401		15	1.55762	0.11032
185	2.11855	2.30479	1.55548	2.6624	1.51773	0.87371	0.88977	1.17287	1.27846	1.02662	1.92444	2.00168	1.79933	1.79187	1.88657		15	1.65362	0.13683
185.5	2.00503	2.15653	1.41369	2.45797	1.36048	0.88989	0.93962	1.00289	0.93997	0.865	1.78171	1.77553	1.70765	1.75255	1.81979		15	1.52455	0.13159
186	1.96781	2.10573	1.37747	2.33166	1.37141	0.71287	0.87699	1.00173	1.00396	0.92826	1.80741	1.73993	1.6831	1.62866	1.76544		15	1.48683	0.12739
186.5	1.88548	1.9501	1.304	2.02703	1.27447	0.84516	0.94826	1.07518	1.09018	0.91518	1.94097	1.89658	1.80036	1.78682	1.87432		15	1.50761	0.11558
187	1.79083	1.89391	1.28329	2.08696	1.20239	0.88585	0.81094	1.03636	1.05293	0.9594	1.96071	1.93188	1.86789	1.80093	1.81797		15	1.49215	0.1196
187.5	1.83111	1.92201	1.23387	1.99908	1.29598	0.76973	0.73464	0.96349	0.80354	0.93897	2.01116	2.02227	1.85516	1.88478	1.94813		15	1.48093	0.13557
188	1.73322	1.82802	1.19396	1.84189	1.17682	0.80162	0.77801	1.01284	1.04841	0.92945	1.85629	1.89257	1.73181	1.73968	1.85705		15	1.42811	0.11328
188.5	1.68867	1.84365	1.13169	1.93294	1.1071	0.85254	0.90813	0.77215	0.96157	0.91577	1.62543	1.5655	1.54805	1.5459	1.63273		15	1.33545	0.1023
189	1.76098	1.75541	1.14617	1.9034	1.10498	0.96865	0.85899	0.9798	0.88194	0.87194	1.60255	1.60387	1.56691	1.52029	1.62401		15	1.34333	0.09737
189.5	1.67301	1.71019	1.14568	1.87728	1.10041	0.83969	0.84298	0.98153	1.02557	0.82376	1.74521	1.69814	1.64331	1.63555	1.6237		15	1.35773	0.10167
190	1.63347	1.63782	1.07495	1.74926	1.08167	0.7557	0.83146	0.95714	0.77453	0.74285	1.65191	1.68126	1.59581	1.55866	1.63917		15	1.29104	0.10426
190.5	1.58492	1.64357	1.02691	1.7229	1.01425	0.87181	0.81382	0.78456	0.80395	0.79361	1.65144	1.73439	1.69336	1.65978	1.67054		15	1.29799	0.10814
191	1.776	1.77572	1.1498	1.92354	1.1513	0.76688	0.66517	0.85786	0.76424	0.88146	1.73142	1.84985	1.80274	1.70533	1.77644		15	1.37185	0.1251
191.5	1.70673	1.75703	1.09245	1.9189	1.05554	0.88228	0.74561	0.89048	0.86362	0.82336	1.86718	1.9586	1.81784	1.76422	1.76352		15	1.39382	0.12439
192	1.67152	1.75949	1.08936	1.85105	1.02212	0.93011	0.63907	0.91876	0.89367	0.84993	1.72868	1.73357	1.72997	1.62669	1.70954		15	1.34357	0.11262
192.5	1.61958	1.65591	1.01889	1.61367	1.05036	0.95033	0.84928	0.98009	0.86548	0.95305	1.51333	1.47323	1.57202	1.46967	1.54664		15	1.27544	0.08268
193	1.57168	1.62494	0.97998	1.63039	1.02414	0.71334	0.89121	0.82872	0.73522	0.80988	1.58367	1.62718	1.58851	1.52767	1.59454		15	1.24874	0.1007
193.5	1.54467	1.48183	0.94543	1.57266	0.99985	0.78687	0.85126	0.81905	0.7416	0.83684	1.54764	1.51525	1.56185	1.43504	1.48892		15	1.20858	0.09024
194	1.46637	1.43739	0.87022	1.45684	0.89867	0.71025	0.76433	0.82193	0.82144	0.99489	1.44933	1.46629	1.49204	1.42203	1.48419		15	1.17041	0.08412
194.5	1.41969	1.40043	0.81487	1.44183	0.83281	0.62697	0.75677	0.82179	0.86609	0.84279	1.64141	1.66319	1.62463	1.5915	1.60328		15	1.19654	0.10334
195	1.4279	1.40342	0.86441	1.45208	0.91609	1.00863	0.71412	0.87662	0.884	0.76446	1.68426	1.91917	1.70479	1.6991	1.62399		15	1.26287	0.10675
195.5	1.36818	1.37065	0.82796	1.33089	0.86915	0.83231	0.7951	0.94704	0.8807	0.73789	1.78547	1.78895	1.7228	1.68744	1.66251		15	1.24047	0.1067
196	1.39399	1.38419	0.8476	1.49114	0.86487	0.82184	0.94178	1.01558	0.86465	0.88464	1.4429	1.37101	1.38289	1.37909	1.40329		15	1.16597	0.0699
196.5	1.35985	1.43792	0.83463	1.51042	0.8667	0.65195	0.80086	1.0912	0.85416	0.75217	1.36903	1.21501	1.30376	1.28949	1.29192		15	1.10861	0.07386
197	1.37785	1.31842	0.8271	1.42267	0.8369	0.84516	0.75839	1.0101	0.85478	0.88979	1.36261	1.33518	1.29202	1.20281	1.33582		15	1.11131	0.06518
197.5	1.3341	1.2911	0.7817	1.414	0.76233	0.81756	0.70278	0.86912	0.87659	0.74523	1.29704	1.27433	1.31707	1.26305	1.25935		15	1.06702	0.06983
198	1.31963	1.24048	0.75035	1.33626	0.7925	0.89989	0.80914	0.98672	0.87803	0.77041	1.27079	1.16246	1.25685	1.20155	1.24433		15	1.06129	0.05783
198.5	1.34886	1.29428	0.79021	1.52165	0.78751	0.82517	0.94862	0.87345	0.93482	0.85568	1.1301	1.14422	1.20236	1.15342	1.17842		15	1.06592	0.05826
199	1.2561	1.30254	0.80344	1.37739	0.78285	0.81804	0.74633	0.89827	0.84757	0.90486	1.13887	1.22254	1.25447	1.22025	1.21861		15	1.05281	0.05829
199.5	1.29803	1.29865	0.79049	1.46148	0.80498	0.84706	0.75371	0.89769	0.70189	0.89931	1.26296	1.28916	1.33589	1.28528	1.28351		15	1.08067	0.06887
200	1.32961	1.35406	0.76683	1.43048	0.81138	0.70739	0.77927	0.85685	0.68831	0.89713	1.36237	1.44681	1.35645	1.36325	1.35021		15	1.10003	0.07971
200.5	1.32467	1.29769	0.78742	1.55191	0.80809	0.79591	0.74669	0.8811	0.73769	0.9007	1.26061	1.39538	1.32979	1.30438	1.35144		15	1.09823	0.07508
201	1.29177	1.2935	0.77238	1.35152	0.74006	0.83993	0.84154	0.82915	0.79695	0.68673	1.27385	1.35077	1.31563	1.29263	1.28039		15	1.06379	0.07018
201.5	1.23761	1.24414	0.69737	1.25474	0.77786	0.85135	0.74507	0.87648	0.77288	0.93223	1.26233	1.27533	1.33911	1.3147	1.29396		15	1.05834	0.06453
202	1.19825	1.21808	0.64379	1.17748	0.74039	0.72357	0.68766	0.8443	0.79016	0.92965	1.21055	1.24773	1.25402	1.25713	1.20535		15	1.00854	0.06314
202.5	1.2612	1.23533	0.70637	1.33223	0.71237	0.73785	0.79007	0.85195	0.74798	0.85965	1.1359	1.10597	1.16257	1.16697	1.17362		15	0.99867	0.05916
203	1.27435	1.36478	0.78944	1.48638	0.79137	0.78044	0.76199	0.85325	0.6702	0.95444	1.00131	1.02311	1.0527	1.0701	1.10576		15	0.99864	0.06131
203.5	1.26904	1.26654	0.75799	1.46282	0.76751	0.7024	0.74039	0.81198	0.71691	0.90645	0.96935	1.02352	1.10298	1.0134	1.07223		15	0.97223	0.06002
204	1.20527	1.22473	0.73184	1.18981	0.77725	0.99221	0.86385	0.94877	0.81012	0.90585	1.10832	1.17411	1.14133	1.15536	1.18097		15	1.02732	0.04494
204.5	1.18812	1.25067	0.71557	1.2368	0.812	0.77854	0.9407	0.83478	0.649	0.90526	1.14647	1.27068	1.30712	1.19075	1.19565		15	1.02814	0.05914
205	1.16923	1.18088	0.7228	1.17626	0.76025	0.77378	0.77207	0.83709	0.74798	0.84339	1.16081	1.16393	1.22943	1.16293	1.14484		15	0.98971	0.05326
205.5	1.13624	1.16926	0.69235	1.03542	0.74707	0.84254	0.76397	0.81457	0.67905	0.9001	0.97201	1.03535	1.0791	1.03356	1.04752		15	0.92988	0.04214
206	1.10637	1.08977	0.64475	0.91985	0.70785	0.73571	0.85126	0.82222	0.75395	0.84993	0.92814	0.92501	0.9928	0.97537	0.98197		15	0.88566	0.03516
206.5	1.03054	1.03058	0.60718	1.01944	0.66247	0.83683	0.84946	0.90447	0.77597	0.88741	0.85216	0.81185	0.87034	0.86025	0.89735		15	0.85975	0.03093
207	1.09801	1.0416	0.62776	0.97245	0.69783	0.94819	0.79708	0.8342	0.78975	0.83585	0.81409	0.77295	0.86882	0.84713	0.87294		15	0.85458	0.03163
207.5	1.08977	1.13835	0.62002	1.05019	0.74627	0.9401	0.82012	0.7684	0.76918	0.85073	0.86312	1.00716	0.94602	0.93409	0.93095		15	0.8983	0.03647
208	1.06863	1.13445	0.64289	1.08705	0.70192	0.80233	0.88365	0.72035	0.76485	0.75653	1.02246	1.11703	1.10092	1.02408	1.09061		15	0.92785	0.04615
208.5	1.01852	1.03885	0.60914	1.04384	0.6846	0.94176	0.78071	0.82251	0.71856	0.84022	0.88247	1.01293	0.99661	0.99391	1.01324		15	0.89319	0.03696
209	1.03591	1.07114	0.58292	1.01565	0.62071	0.72976	0.84532	0.75108	0.78049	0.90209	1.05709	1.17217	1.1498	1.08312	1.10975		15	0.92713	0.05051
209.5	1.02664	1.01159	0.56414	0.96232	0.63963	0.69478	0.88563	0.85267	0.8593	0.72441	1.03578	1.19895	1.2245	1.16298	1.15952		15	0.93352	0.05446
210	1.00677	0.96025	0.54252	1.0342	0.60206	0.88109	0.76361	0.88427	0.67164	0.76744	1.08819	1.15328	1.17252	1.10827	1.0982		15	0.91562	0.05307
210.5	0.96799	0.91491	0.54601	0.93925	0.63596	0.87086	0.79367	0.81818	0.69962	0.99192	1.09916	1.187	1.1339	1.0961	1.13351		15	0.92187	0.0503
211	0.93827	0.93959	0.53515	0.90654	0.61892	0.86443	0.83668	0.78802	0.91589	0.91498	0.95329	0.93655	1.07945	1.01267	1.02061		15	0.88407	0.03737
211.5	1.00647	1.00973	0.56848	0.99393	0.62108	0.799	0.91712	0.82107	0.76815	0.66987	0.81597	0.88023	0.98397	0.93748	0.98619		15	0.85192	0.03752
212	1.00269	0.95564	0.54408	0.87835	0.60338	0.85753	0.96212	0.88167	0.85025	1.03555	0.83618	0.89377	0.99912	0.93294	0.97188		15	0.88034	0.03586
212.5	0.93931	0.97601	0.53248	0.94902	0.60013	0.88561	1.02169	0.83939	0.76629	0.88384	0.93386	0.96909	1.0385	0.93392	1.0051		15	0.88495	0.03814
213	0.97977	0.92779	0.53127	0.9373	0.57382	0.90012	0.86565	0.96753	0.87597	0.90804	0.94326	1.01511	1.0627	0.96255	1.03815		15	0.89927	0.03915
213.5	0.98554	0.91467	0.52874	0.85285	0.63521	0.92987	0.91298	0.91443	0.75745	0.96198	0.93324	0.96844	1.0735	0.97722	0.99784		15	0.8896	0.03735
214
214.5
215
215.5
216
216.5
217
217.5
218
218.5
219	1.14678	1.10033	1.12758	1.21549	1.04232	0.85596	1.1708	1.00636	0.9172	1.1794	0.93475	0.98386	0.97152	0.94202	0.92692		15	1.03475	0.02936
219.5	1.11653	1.10416	1.17419	1.1991	1.10121	0.84423	1.09817	0.94279	0.98437	1.11122	0.96613	0.9139	0.94565	0.94933	0.91763		15	1.02457	0.02814
220	1.17246	1.01833	1.11224	1.17902	1.00971	0.95101	0.9811	1.05851	1.0235	1.06534	0.9069	0.89947	0.92346	0.90126	0.89308		15	1.00636	0.02498
220.5	1.12094	1.03271	1.04727	1.15971	1.10663	1.04337	0.97797	0.98266	1.04367	1.06148	0.85306	0.83013	0.88926	0.88306	0.88183		15	0.99425	0.02699
221	1.06755	1.11384	1.07783	1.07865	1.02184	0.79414	0.80689	0.94496	0.92405	1.10157	0.91332	0.86503	0.89186	0.88455	0.88197		15	0.95787	0.02821
221.5	1.03951	1.08219	1.03155	0.94303	0.92079	1.00403	1.02332	1.04869	0.96278	0.95728	0.92764	0.89684	0.92796	0.88892	0.89484		15	0.96996	0.01632
222	1.04836	0.99991	1.08373	1.0362	1.04251	1.01405	0.94184	1.16989	0.89198	1.06362	0.89765	0.92177	0.91599	0.91491	0.89078		15	0.98888	0.02199
222.5	1.09977	1.04188	1.07705	1.01858	1.07291	1.01063	1.01447	1.0091	0.95956	0.90304	0.95149	0.93454	0.93329	0.92374	0.9075		15	0.9905	0.01674
223	0.98551	1.00583	1.05698	1.06884	1.07291	1.03531	1.02535	0.98888	0.7415	0.94549	0.93029	0.93063	0.95772	0.92087	0.91887		15	0.97233	0.02162
223.5	1.01994	1.04268	1.03723	1.17059	1.09588	1.06487	1.1402	0.92834	1.12133	1.08227	0.95437	0.94303	0.95929	0.93924	0.91018		15	1.0273	0.02182
224	1.02803	0.99594	1.10331	1.0267	1.07346	0.98448	1.05374	0.96764	0.87342	1.05033	0.90211	0.89205	0.9008	0.8917	0.89212		15	0.97572	0.02023
224.5	1.03335	0.99362	1.12079	1.2653	1.0866	0.91655	0.94921	1.02658	0.92728	0.9993	0.86678	0.90716	0.91189	0.88206	0.88611		15	0.98484	0.02818
225	1.03305	1.06608	1.1529	1.15067	1.05133	1.03067	1.086	1.07007	1.00131	0.95814	0.88737	0.89404	0.89896	0.90224	0.89472		15	1.00517	0.02425
225.5	1.00497	1.03856	1.10028	1.07145	0.98317	1.04924	0.93483	1.15935	1.11427	0.91826	0.87333	0.86754	0.8769	0.86312	0.86601		15	0.98142	0.02664
226	1.04855	0.98503	1.03938	1.0903	1.00163	1.09102	0.99253	1.06429	1.04266	1.17511	0.87198	0.89231	0.87211	0.8794	0.87169		15	0.99453	0.02508
226.5	1.00972	1.02129	0.9765	0.93859	1.05261	1.07905	1.09522	1.09058	1.16188	0.99952	0.90039	0.88515	0.90161	0.88699	0.89799		15	0.99314	0.02316
227	1.0139	1.04687	1.00033	1.15803	1.04444	1.09469	0.95271	0.96591	0.97368	1.01024	0.87933	0.88993	0.87903	0.87138	0.87563		15	0.97707	0.02267
227.5	1.00307	1.01804	1.05339	0.99084	0.93338	0.80318	1.00396	0.96764	0.9055	1.03725	0.84795	0.86897	0.87435	0.87318	0.86312		15	0.93625	0.02044
228	0.97332	0.9138	0.96977	0.91254	0.96957	1.02309	0.94811	0.97587	0.95895	0.95299	0.90225	0.88586	0.87493	0.89836	0.89318		15	0.93684	0.01101
228.5	0.99699	1.00461	0.95714	1.00326	1.09514	0.89994	0.89188	0.98873	0.94302	0.94528	0.94028	0.88906	0.91615	0.88202	0.88958		15	0.94954	0.0154
229	0.99543	1.08292	1.06602	1.14991	1.04168	0.93366	0.9588	0.94192	0.93979	0.8473	0.8592	0.8368	0.86898	0.86072	0.87076		15	0.95026	0.02531
229.5	1.15783	1.22141	1.32587	1.60411	1.24873	1.00159	0.97686	1.1566	1.11266	1.11722	0.93763	0.97123	0.97362	0.94328	0.93209		15	1.11205	0.04798
230	1.26685	1.32363	1.6102	1.83964	1.3473	1.35052	1.38188	1.551	1.39647	1.31254	1.03699	1.09468	1.06088	1.02408	0.99197		15	1.30591	0.06218
230.5	1.36412	1.58197	1.85803	2.30977	1.60836	1.89322	1.58153	2.08769	2.09117	1.56981	1.22947	1.2449	1.17979	1.11414	1.08057		15	1.5863	0.10085
231	1.45825	1.73722	2.09603	2.63908	1.89569	2.20257	1.99134	2.68607	3.07756	1.90856	1.25407	1.29663	1.2456	1.18706	1.13292		15	1.85391	0.15714
231.5	1.60446	2.01073	2.42697	3.29418	1.98048	2.69982	2.29846	3.7937	4.05951	2.35794	1.35877	1.41833	1.35068	1.2547	1.1808		15	2.20597	0.23846
232	1.77443	2.31761	2.69399	3.62594	2.19194	3.56359	2.82625	4.37099	4.87705	2.73656	1.41717	1.48676	1.40179	1.28448	1.21314		15	2.51878	0.3003
232.5	1.93504	2.56389	3.07799	4.00444	2.45319	4.18497	3.4405	5.12959	5.54332	3.15806	1.4565	1.49213	1.4655	1.33091	1.26517		15	2.83341	0.36289
233	2.06511	2.66517	3.35626	4.35597	2.58491	4.82126	3.75924	6.103	6.23439	3.37675	1.48886	1.56132	1.493	1.37549	1.29113		15	3.10212	0.43247
233.5	2.25536	2.98347	3.68919	4.96617	2.98808	5.41698	4.36722	6.57036	7.2936	3.84692	1.6514	1.65729	1.55199	1.43746	1.32736		15	3.46686	0.49854
234	2.37225	3.33645	3.97308	5.24583	3.22058	5.8788	5.05005	7.12453	8.06394	4.3231	1.71733	1.69841	1.59222	1.46351	1.40972		15	3.76465	0.55585
234.5	2.47963	3.52277	4.15256	5.51032	3.28341	5.96188	5.07973	7.12569	8.19748	4.77376	1.79349	1.81574	1.69102	1.5408	1.44476		15	3.89154	0.55947
235	2.69238	3.73769	4.62967	5.67123	3.50378	6.63091	5.71352	7.52109	8.68966	4.75725	1.82956	1.76444	1.73319	1.59618	1.48015		15	4.13005	0.60458
235.5	2.9508	3.91837	4.76448	6.28725	3.7789	6.53268	5.58153	7.60849	8.66082	4.7729	1.87448	1.84218	1.78188	1.59022	1.52831		15	4.23155	0.60331
236	2.99963	4.22012	5.0567	6.44815	3.81022	7.02724	6.31763	7.87908	8.91639	4.98987	1.88898	1.93161	1.83693	1.6516	1.57657		15	4.43672	0.63572
236.5	3.1998	4.57678	5.42388	7.05528	4.23764	7.12401	6.31892	7.62236	8.67937	5.28274	2.01796	1.92331	1.80191	1.61159	1.58467		15	4.56402	0.63257
237	3.27006	4.55901	5.58456	7.26874	4.17012	7.30874	6.52797	7.62179	9.33192	5.84424	2.0432	1.96635	1.87353	1.70547	1.65331		15	4.71527	0.66167
237.5	3.48026	4.97744	5.9016	7.67881	4.3464	7.57312	6.78643	7.60416	9.28129	5.51428	2.16455	2.01213	1.95508	1.72375	1.68124		15	4.84537	0.66741
238	3.6788	5.22379	6.33933	8.27277	4.70658	7.28699	6.87676	7.36189	8.76107	5.90642	2.13094	2.00718	1.93268	1.72021	1.69194		15	4.92649	0.66153
238.5	3.61288	5.35469	6.31506	8.1989	4.73625	7.5653	6.89833	7.48989	9.28472	5.77006	2.31621	2.11497	2.03153	1.8012	1.7402		15	5.01535	0.67121
239	3.74424	5.40786	6.50083	8.23384	4.63355	7.27282	6.86072	7.35048	8.90328	5.81251	2.30933	2.08805	2.02475	1.80813	1.8082		15	4.98391	0.65312
239.5	3.85941	5.67112	6.58781	8.57311	4.70943	7.41405	7.00525	7.52514	8.96944	6.07279	2.30157	2.11087	2.02365	1.82261	1.78824		15	5.09563	0.67266
240	3.96375	5.68253	6.75472	8.40808	5.07447	7.37031	7.33653	7.4386	8.90711	6.14311	2.3528	2.02681	2.02091	1.78235	1.78717		15	5.13662	0.67243
240.5	3.96611	5.9288	6.9187	8.71379	5.25985	7.7317	7.27127	7.41563	8.58759	6.1594	2.29101	2.05901	1.97367	1.75961	1.76618		15	5.18682	0.68217
241	4.12585	6.02409	7.14457	8.95284	5.35896	7.86683	7.37874	7.28749	8.80908	6.51702	2.2441	2.04393	1.95382	1.76358	1.76437		15	5.28235	0.70186
241.5	4.30623	6.48291	7.53955	9.43003	5.84067	7.55333	7.44253	7.20977	8.66606	6.09187	2.19031	2.02902	2.01282	1.76379	1.76975		15	5.35524	0.71087
242	4.41482	6.58405	7.80298	9.51324	5.97074	7.7471	7.21375	7.1358	8.46193	6.14461	2.21086	2.0955	1.94838	1.77134	1.78075		15	5.38639	0.71181
242.5	4.30433	6.52199	7.79581	9.708	5.84076	7.59267	7.05392	7.10965	8.44075	5.85325	2.28869	2.05351	1.97167	1.75378	1.77237		15	5.33741	0.71013
243	4.43291	6.70267	7.89818	9.49791	5.85316	7.62175	7.12047	6.91448	8.52567	5.80951	2.21258	2.03319	1.96505	1.75809	1.74734		15	5.33953	0.70994
243.5	4.57673	7.005	8.22289	9.93909	6.14031	7.60269	7.12139	6.96316	8.1059	6.14911	2.23648	2.05631	2.00272	1.8048	1.76064		15	5.44582	0.72172
244	4.46498	6.85698	8.11114	9.65667	6.17871	7.16359	7.12692	6.89613	8.19486	6.09294	2.2601	2.04042	1.99347	1.80915	1.7797		15	5.37505	0.70521
244.5	4.58897	6.96541	8.17352	9.83611	6.18551	7.44288	6.74385	6.93672	8.22209	6.45977	2.31728	2.06181	2.01847	1.8265	1.80247		15	5.43876	0.71146
245	4.55344	6.9113	8.42024	9.90354	6.48754	7.37984	7.1037	6.71092	8.15512	5.96923	2.30557	2.02713	2.01342	1.79579	1.82451		15	5.43742	0.71786
245.5	4.54204	7.05687	8.41528	10.1758	6.46302	7.40745	7.13964	6.64013	7.87413	6.16541	2.39851	2.16286	2.08175	1.85051	1.86147		15	5.48233	0.71491
246	4.59178	7.23242	8.71798	10.045	6.75246	7.6755	6.93262	6.64663	8.09581	6.43233	2.44946	2.12887	2.06558	1.79992	1.90262		15	5.5646	0.72752
246.5	4.53919	7.18843	8.80072	9.94338	6.73556	7.83213	6.87547	6.68188	8.2237	6.27368	2.41204	2.09179	2.06051	1.83174	1.88349		15	5.55825	0.73078
247	4.53452	7.1851	8.86652	10.0917	6.66878	7.42627	7.21099	6.51474	8.14261	6.09852	2.43923	2.06982	2.06605	1.76775	1.87693		15	5.53064	0.73203
247.5	4.57639	7.25908	8.90033	9.9017	6.70323	7.36494	7.11402	6.68058	7.84488	6.09916	2.39046	2.05438	2.02933	1.75911	1.86361		15	5.50275	0.7253
248	4.46829	7.18626	8.72896	9.90645	6.6809	7.6584	7.0447	6.68232	7.99254	6.31506	2.4596	2.0983	2.03359	1.80954	1.9066		15	5.53143	0.72313
248.5	4.54888	7.22375	8.77573	9.89388	6.69459	7.39548	7.07733	6.48916	7.92839	6.52474	2.38991	2.12926	2.03038	1.78606	1.90484		15	5.51949	0.72088
249	4.43884	7.17224	8.65085	9.49807	6.71682	7.34099	6.85833	6.52066	7.96571	6.07172	2.42157	2.10319	2.04925	1.78498	1.92253		15	5.43438	0.70189
249.5	4.2148	6.34579	7.83855	8.5889	5.9554	5.83653	5.41469	5.85033	6.78124	4.5838	2.19817	1.79624	1.89277	1.65077	1.76226		15	4.71402	0.60734
250	3.87229	5.84255	7.00243	7.64127	5.20427	4.78119	4.42824	4.808	5.76097	3.65482	2.08528	1.7394	1.77814	1.58551	1.68428		15	4.12458	0.51858
250.5	3.54536	5.22328	6.31451	6.47159	4.63952	3.93794	3.67665	3.71598	4.57105	3.0052	1.93827	1.67145	1.69885	1.5292	1.58858		15	3.5685	0.43193
251	3.55105	5.11947	6.20347	6.65946	4.61711	3.21368	3.13061	3.14259	4.04518	2.68532	1.70794	1.43711	1.49647	1.35147	1.4328		15	3.31958	0.44909
251.5	3.34146	4.62764	5.66018	5.87335	4.18078	3.03482	2.8657	3.27463	3.67201	2.29126	1.58715	1.38798	1.4416	1.33039	1.39078		15	3.06398	0.39569
252	3.11541	4.21275	5.16238	5.47585	3.8443	2.94832	2.78256	3.12511	3.77932	2.31012	1.43451	1.26759	1.33699	1.22338	1.27409		15	2.88618	0.36716
252.5	2.89962	3.85154	4.51318	4.93506	3.40503	2.46182	2.19559	2.69662	3.11125	1.7424	1.30191	1.16741	1.21878	1.13977	1.22027		15	2.52402	0.32514
253	2.74717	3.63879	4.31936	4.7737	3.29691	2.13855	2.07909	2.39526	2.71992	1.5533	1.26434	1.13014	1.20096	1.11612	1.16975		15	2.36956	0.31058
253.5	2.76784	3.56922	4.08047	4.34908	3.11053	1.83335	1.71758	2.18304	2.43449	1.42724	1.19516	1.08645	1.15253	1.08093	1.12087		15	2.20725	0.29247
254	2.52967	3.26905	3.91318	3.85013	2.84432	1.75614	1.70633	2.26625	2.36732	1.47912	1.13439	0.99402	1.08533	1.02976	1.06987		15	2.08633	0.2637
254.5	2.48502	3.03289	3.59835	3.74685	2.75265	1.58461	1.60218	1.88154	2.07383	1.20984	1.07604	0.98184	1.06149	0.97523	1.01389		15	1.93842	0.25058
255	2.31077	2.87598	3.2326	3.53216	2.60025	1.18094	1.30187	1.65227	1.93364	1.15967	1.04136	0.97575	1.02928	0.96961	0.98623		15	1.78549	0.23289
255.5	2.24587	2.67709	3.09879	3.36099	2.41653	1.63616	1.51019	1.89223	1.93565	1.14445	1.03601	0.96351	1.06075	0.99393	0.99382		15	1.79773	0.20895
256	2.2513	2.69841	3.03475	3.4206	2.41176	1.50666	1.42446	1.81393	1.83419	1.23836	0.95344	0.90423	0.96098	0.91322	0.93618		15	1.7535	0.21606
256.5	2.16067	2.57776	2.89537	3.08516	2.21702	1.41063	1.22924	1.85597	1.66657	1.22421	0.98557	0.93542	0.97591	0.9328	0.94412		15	1.67309	0.19424
257	2.08221	2.46333	2.82046	2.98694	2.27571	1.21906	0.92248	1.64114	1.48966	1.06362	0.94423	0.92672	0.9848	0.94557	0.93618		15	1.58014	0.19369
257.5	2.04531	2.44512	2.72206	2.95935	2.19405	1.16823	1.11918	1.45016	1.44044	1.04154	0.90374	0.86487	0.90177	0.86917	0.90675		15	1.53545	0.19042
258	2.09824	2.42287	2.79912	3.19166	2.27085	1.26378	1.17651	1.67278	1.43399	1.02653	0.89662	0.88814	0.93787	0.90788	0.90791		15	1.59298	0.19998
258.5	1.94378	2.23331	2.48163	2.94449	2.09668	1.20611	1.17891	1.63233	1.47857	0.95106	0.91169	0.95117	0.97231	0.93598	0.93373		15	1.52345	0.17191
259	1.83271	2.23208	2.37551	2.82128	1.85895	1.25913	1.11715	1.52875	1.3767	1.02374	0.91471	0.91666	0.9146	0.92647	0.90337		15	1.46679	0.16079
259.5	1.77272	1.9931	2.21258	2.44003	1.76801	1.0077	1.16232	1.58437	1.31639	1.10522	0.88347	0.85653	0.88592	0.89402	0.87467		15	1.3838	0.13906
260	1.74768	2.0168	2.09355	2.14397	1.81761	1.00599	1.0342	1.45883	1.13384	1.03061	0.87668	0.86594	0.8958	0.86871	0.88		15	1.32468	0.12893
260.5	1.75113	2.02821	2.13844	2.25078	1.81118	1.13769	1.0659	1.37446	1.20585	0.92062	0.84497	0.82459	0.86317	0.83818	0.84606		15	1.32675	0.13582
261	1.82576	2.13022	2.2636	2.56262	1.86951	1.02505	0.96193	1.35077	1.2829	0.84622	0.87342	0.86252	0.89067	0.87574	0.86896		15	1.36599	0.15512
261.5	1.72803	2.06787	2.08731	2.18963	1.65686	0.87502	0.95585	1.25932	1.06465	0.91783	0.90629	0.86268	0.91008	0.88033	0.8639		15	1.28171	0.13226
262	1.66925	1.79638	1.98092	1.85833	1.58227	0.96103	0.97908	1.2742	0.96097	0.96286	0.92843	0.84934	0.89785	0.8745	0.87472		15	1.23001	0.10859
262.5	1.58626	1.7901	1.85157	1.97663	1.57658	1.01723	1.03198	1.28662	1.18689	1.02696	0.86157	0.84553	0.87774	0.86555	0.86703		15	1.24322	0.10477
263	1.62236	1.80404	1.89757	2.12466	1.6395	0.93855	1.0023	1.41823	0.98174	1.00681	0.89072	0.87086	0.88121	0.87299	0.88027		15	1.25545	0.1152
263.5	1.60894	1.63283	1.70017	1.95012	1.51595	0.90018	1.01447	1.39598	1.04609	1.03789	0.86055	0.87606	0.88229	0.87688	0.88277		15	1.21208	0.09768
264	1.5852	1.63088	1.78472	1.90875	1.55481	0.82981	0.85022	1.06848	0.90247	0.92276	0.88612	0.87646	0.85453	0.86293	0.87931		15	1.15983	0.10376
264.5	1.62171	1.73628	1.83828	2.05785	1.59283	0.98864	0.74827	1.27781	0.9995	0.92041	0.84306	0.84598	0.87485	0.85893	0.88596		15	1.20602	0.11358
265	1.54401	1.7914	1.76172	2.0439	1.34748	1.05388	0.8799	1.34022	0.8944	0.96071	0.84725	0.84243	0.86352	0.84604	0.86331		15	1.19201	0.10724
265.5	1.52288	1.67379	1.68643	1.8499	1.3574	0.78803	0.9293	1.11355	1.02874	1.05333	0.86082	0.85067	0.84501	0.8551	0.87522		15	1.15268	0.09431
266	1.52569	1.70883	1.72808	1.94951	1.49684	0.92046	1.07365	1.04478	0.81533	1.00788	0.88695	0.90771	0.90064	0.88695	0.88824		15	1.18277	0.09906
266.5	1.54518	1.72985	1.75251	2.11593	1.54149	0.70617	0.90866	1.08408	0.85648	0.86209	0.91122	0.89322	0.89814	0.88075	0.89672		15	1.17217	0.11309
267	1.50662	1.69727	1.65742	1.79811	1.45743	0.75773	0.9341	1.13118	0.86717	0.88374	0.89667	0.85536	0.87551	0.86982	0.87843		15	1.13777	0.09579
267.5	1.44441	1.50944	1.6166	1.79933	1.35244	1.06243	0.86404	0.9961	0.99405	0.87238	0.89225	0.89475	0.88216	0.87808	0.87458		15	1.12887	0.0833
268	1.41022	1.51955	1.50353	1.80393	1.32929	0.78314	0.94073	1.09174	0.89743	0.85523	0.887	0.84224	0.88295	0.84833	0.86937		15	1.09764	0.0841
268.5	1.4907	1.47447	1.49068	1.71628	1.36585	0.89578	0.99806	1.10546	0.87625	0.86016	0.86487	0.8814	0.86609	0.88497	0.87152		15	1.1095	0.079
269	1.43955	1.5694	1.57303	1.67031	1.37596	0.90629	0.80984	1.1566	0.9527	0.9843	0.87933	0.88098	0.87148	0.85668	0.88101		15	1.1205	0.08079
269.5	1.47713	1.53559	1.55256	1.99916	1.38082	1.21075	1.01853	1.10691	1.05255	0.95835	0.8346	0.82909	0.8673	0.8515	0.86711		15	1.16946	0.09016
270	1.39775	1.48856	1.52791	1.7601	1.3089	0.94539	0.90534	1.09087	0.99647	1.08892	0.83525	0.82345	0.83268	0.8327	0.85699		15	1.11275	0.07931
270.5	1.46649	1.66931	1.64876	2.04421	1.43925	1.02114	0.85833	1.22681	1.17922	0.91119	0.80582	0.80548	0.80857	0.82769	0.84098		15	1.17022	0.10269
271	1.46516	1.56694	1.54986	1.84224	1.39956	0.98033	0.85206	1.15588	0.79496	1.0023	0.82884	0.81411	0.82361	0.82869	0.83634		15	1.11606	0.0912
271.5	1.50403	1.57583	1.63756	2.05156	1.44889	0.84178	0.86791	1.01488	0.90751	0.74739	0.85371	0.82811	0.8397	0.82557	0.84045		15	1.11899	0.10544
272	1.51049	1.60162	1.55758	2.06643	1.39267	0.83396	0.85335	1.11153	0.83086	0.91076	0.80117	0.84657	0.84272	0.83787	0.85374		15	1.12342	0.10305
272.5	1.48443	1.49094	1.49189	1.91472	1.29448	0.99792	0.92672	1.06313	0.894	0.94871	0.82544	0.85507	0.84248	0.84915	0.85317		15	1.11548	0.08687
273	1.50601	1.65847	1.61142	2.05264	1.36815	1.02382	1.02185	1.05822	0.94967	0.91676	0.85273	0.81069	0.84637	0.84656	0.85553		15	1.15859	0.09926
273.5	1.4497	1.58182	1.59835	1.78753	1.41151	0.89212	0.69942	0.96749	0.82259	0.69507	0.8492	0.84188	0.82902	0.84009	0.84284		15	1.07391	0.09664
274	1.39779	1.54036	1.4711	1.71812	1.27904	0.79023	0.91437	0.92632	0.69692	0.9412	0.78746	0.82157	0.84206	0.82208	0.85047		15	1.05327	0.08539
274.5	1.44856	1.57026	1.55538	1.83274	1.37568	0.86231	0.88782	0.96966	0.84539	0.76432	0.86622	0.81424	0.84304	0.83859	0.84346		15	1.08784	0.09241
275	1.35603	1.46746	1.47854	1.91334	1.18112	0.79194	0.96414	0.84701	0.86515	0.84215	0.84553	0.84852	0.81732	0.83381	0.84318		15	1.05968	0.08814
275.5	1.31822	1.40801	1.44396	1.70938	1.2446	0.90751	0.91787	0.91491	0.80827	0.99823	0.84079	0.80343	0.85056	0.82251	0.83766		15	1.05506	0.07515
276	1.33749	1.45417	1.42129	1.82876	1.19251	0.66268	0.84247	0.96388	0.82905	0.8921	0.85078	0.83123	0.84635	0.83981	0.85529		15	1.04319	0.08438
276.5	1.36515	1.43799	1.43547	1.81159	1.21401	0.83983	0.87271	0.94135	0.71911	0.97379	0.84497	0.82518	0.82532	0.83981	0.85581		15	1.05347	0.0826
277	1.33669	1.41523	1.30386	1.59767	1.18498	0.80244	0.81869	0.82274	0.68946	0.7744	0.86199	0.83084	0.81341	0.82436	0.84758		15	0.99496	0.07421
277.5	1.41797	1.4848	1.56713	1.95656	1.28722	0.7504	0.76247	0.74747	0.69773	0.82929	0.82321	0.80317	0.83115	0.82641	0.83569		15	1.04138	0.10146
278	1.34684	1.48943	1.42124	1.7955	1.29292	0.79511	1.01613	0.83487	0.70943	0.93134	0.83325	0.792	0.82166	0.82221	0.84557		15	1.04983	0.08551
278.5	1.3441	1.46457	1.36939	1.72103	1.18921	0.83445	0.78496	0.77319	0.74755	0.96607	0.80364	0.83228	0.82156	0.81314	0.85583		15	1.0214	0.08058
279	1.38882	1.51659	1.45571	1.83443	1.27941	0.8865	0.79086	0.78908	0.74291	0.85373	0.83776	0.7838	0.81356	0.81553	0.85914		15	1.04319	0.09056
279.5	1.36667	1.51782	1.43331	1.84055	1.301	0.81735	0.80948	0.85987	0.56803	0.96414	0.86199	0.81974	0.84059	0.83177	0.8694		15	1.04678	0.0914
280	1.3987	1.52815	1.47678	1.85741	1.15954	0.88919	0.92211	0.85553	0.69713	0.78619	0.89095	0.84214	0.83423	0.83552	0.8759		15	1.05663	0.08894
280.5	1.39346	1.53913	1.40524	1.95824	1.35703	0.90336	0.89907	0.87244	0.63802	0.83658	0.82182	0.83937	0.82894	0.8335	0.8752		15	1.06676	0.09542
281	1.43472	1.53219	1.4588	1.8545	1.20051	0.80367	0.83879	0.78171	0.83086	0.81728	0.87951	0.83651	0.82476	0.83791	0.88444		15	1.05441	0.08983
281.5	1.33992	1.37485	1.35549	1.61162	1.27317	0.77776	0.8952	0.82462	0.75098	0.80742	0.8797	0.83273	0.84451	0.83851	0.88444		15	1.01939	0.07309
282	1.36173	1.45388	1.4214	1.9584	1.33738	0.81173	0.92377	0.8551	0.68058	0.94442	0.8857	0.85907	0.8612	0.84662	0.88697		15	1.07253	0.0906
282.5	1.29607	1.40801	1.35185	1.81634	1.32323	0.87966	0.90663	0.82505	0.68583	0.99523	0.82191	0.84348	0.83057	0.84367	0.87342		15	1.04673	0.08147
283	1.2814	1.31655	1.22714	1.70846	1.19389	0.70959	0.70421	0.846	0.73424	0.90475	0.79806	0.81346	0.82166	0.81739	0.85099		15	0.98185	0.07571
283.5	1.29155	1.43568	1.35185	1.77252	1.26435	0.67416	0.8222	0.84817	0.66848	0.87474	0.85334	0.81743	0.81364	0.81787	0.84884		15	1.01032	0.08439
284	1.18671	1.28787	1.26012	1.49132	1.12178	0.61576	0.98184	0.83776	0.80343	0.9114	0.84437	0.7977	0.82114	0.81848	0.84801		15	0.97518	0.06197
284.5	1.16019	1.36878	1.20723	1.5327	1.12766	0.76432	0.94995	0.8577	0.75098	0.7982	0.87789	0.84058	0.84351	0.8268	0.8574		15	0.98426	0.06161
285	1.21719	1.31156	1.20877	1.40091	1.16119	0.85767	0.79712	0.88587	0.95391	0.85716	0.87073	0.86151	0.84856	0.85366	0.86295		15	0.99658	0.05212
285.5	1.19747	1.2982	1.23249	1.53975	1.12849	1.01527	0.86017	0.77579	0.76288	0.96564	0.87315	0.86024	0.88139	0.88026	0.88925		15	1.0107	0.0574
286	1.14795	1.33801	1.17645	1.44995	1.13979	1.01185	0.83418	0.81956	0.73585	0.90175	0.87951	0.82922	0.86488	0.85456	0.87901		15	0.99084	0.05457
286.5	1.11809	1.28837	1.16029	1.30223	1.04453	0.95834	0.85409	0.9792	0.88613	0.65841	0.87203	0.86405	0.86307	0.85949	0.86701		15	0.97169	0.0462
287
287.5
288
288.5
289
289.5
290
290.5
291
291.5
292	1.04618	1.00603	1.03055	1.2487	0.92452	1.03128	1.30382	1.15605	1.16682	1.12039	0.86386	0.88569	0.92142	0.89922	0.88129		15	1.03239	0.03631
292.5	0.9845	1.05825	1.01984	1.06059	1.03027	0.98107	1.26063	1.09657	1.06598	1.12615	0.87095	0.88545	0.89332	0.90194	0.86638		15	1.00679	0.02882
293	0.94932	1.00879	0.98204	1.02328	0.96079	1.0118	1.14109	0.99477	1.0506	1.15084	0.86069	0.88667	0.9042	0.86667	0.88878		15	0.97869	0.02342
293.5	0.99454	1.0038	0.94107	1.03054	0.86602	1.17229	1.21358	1.20899	1.11872	0.89099	0.8537	0.87438	0.87701	0.89462	0.88003		15	0.98802	0.03402
294	0.97245	0.99277	0.9393	1.02157	0.96	1.13964	1.11264	1.06029	0.93682	1.2321	0.85442	0.87349	0.86784	0.88093	0.86696		15	0.98075	0.02938
294.5	1.02273	1.0184	0.94048	1.04379	0.95022	1.04527	1.08955	0.89069	1.15315	0.96626	0.90711	0.91363	0.86434	0.87815	0.87223		15	0.9704	0.02267
295	1.00972	1.03658	0.89692	0.90068	0.90199	0.92428	1.04806	0.8933	1.15022	0.90418	0.86668	0.86193	0.85992	0.86812	0.88371		15	0.93375	0.02228
295.5	1.00731	1.01646	0.96073	1.05404	0.99746	1.00439	1.06538	0.90474	0.96905	0.87781	0.88077	0.88744	0.8621	0.87424	0.87074		15	0.94884	0.01867
296	0.98305	1.01259	0.92358	0.97045	0.85169	0.99506	1.10666	0.91634	0.99152	1.06646	0.84656	0.87336	0.88178	0.87399	0.87511		15	0.94455	0.02081
296.5	0.97671	1.04075	0.96226	1.08152	0.94231	1.05158	1.14793	1.01928	0.89263	1.11608	0.87674	0.87924	0.86809	0.8912	0.8694		15	0.97438	0.02486
297	0.95257	1.01944	1.02826	0.96319	0.97789	1.0203	1.03138	1.07042	0.85967	1.03841	0.85926	0.87146	0.88878	0.9038	0.88116		15	0.95773	0.01928
297.5	0.96322	0.97326	0.92046	0.97145	0.94221	1.26255	1.18086	0.98137	0.91436	1.00869	0.86539	0.92061	0.87266	0.90123	0.89513		15	0.97156	0.02855
298	0.96277	0.93601	0.92617	0.91007	0.85653	1.04527	1.07287	0.9719	0.92169	0.83346	0.86932	0.8906	0.87124	0.90616	0.9039		15	0.9252	0.01709
298.5	0.97727	1.00909	0.94024	0.90951	0.89319	1.10123	0.88725	0.88578	0.98663	0.87925	0.89461	0.88715	0.85519	0.89497	0.92044		15	0.92812	0.01679
299	0.99361	0.98577	0.99034	1.04037	0.97176	1.24609	0.96594	1.06683	1.17146	1.08444	0.86046	0.91408	0.88663	0.89899	0.9094		15	0.99908	0.02791
299.5	0.97779	1.03836	0.93801	1.03653	0.91474	1.01756	0.98455	0.95931	0.9986	0.96794	0.88268	0.90475	0.8813	0.8864	0.90473		15	0.95288	0.01435
300	1.00373	0.96186	0.9655	0.97031	1.05033	0.97257	0.98754	1.06569	1.06012	1.00725	0.87186	0.87199	0.88238	0.87855	0.8829		15	0.96217	0.01807
300.5	1.00574	0.96685	1.04616	0.98184	1.06149	1.08093	1.04785	0.98987	0.86162	0.96075	0.90151	0.86144	0.882	0.8922	0.86758		15	0.96052	0.02019
301	1.01273	1.03293	1.05034	1.01132	0.97344	0.92894	0.98006	0.98513	1.07966	1.06406	0.87387	0.89173	0.88424	0.87276	0.8747		15	0.96773	0.01928
301.5	0.90242	0.92171	0.92876	0.91805	1.01771	1.11824	1.1259	1.06601	0.93316	0.99263	0.86836	0.86708	0.89269	0.90393	0.8898		15	0.95643	0.02245
302	1.00257	1.00313	1.04374	1.11399	0.96672	1.16049	0.98156	0.97304	1.13532	0.91472	0.86774	0.90325	0.88808	0.89089	0.88173		15	0.9818	0.02476
302.5	1.04771	1.08127	1.15112	1.27234	1.22209	1.17284	1.28843	1.1982	1.15949	1.18224	0.90582	0.94494	0.91082	0.93509	0.91756		15	1.09266	0.03574
303	1.13874	1.30334	1.32909	1.47754	1.15182	1.49465	1.40091	1.57402	1.57798	1.30497	0.98586	1.02879	0.94983	0.98761	0.9411		15	1.24308	0.0599
303.5	1.2601	1.3277	1.5136	1.72645	1.40581	1.70151	1.63165	2.24281	2.14955	1.64799	1.01044	1.08763	0.98036	1.03651	0.98312		15	1.44701	0.10512
304	1.38467	1.61018	1.68798	2.04073	1.55503	2.47051	2.03475	3.10049	3.14228	1.85701	1.05489	1.18597	1.04126	1.07343	1.00724		15	1.74976	0.18214
304.5	1.45402	1.69882	1.92676	2.51705	1.67017	3.07023	2.70751	3.89297	4.30519	2.50183	1.09149	1.25154	1.09304	1.15404	1.04372		15	2.09189	0.26972
305	1.58939	1.91083	2.04415	2.82506	1.7597	3.52099	3.30564	4.79673	5.17121	2.92755	1.16349	1.24148	1.13704	1.19159	1.07985		15	2.37765	0.34541
305.5	1.81182	2.19383	2.38973	3.29826	1.90448	4.48395	3.82144	5.65098	6.33632	3.30748	1.17326	1.33337	1.16466	1.20373	1.10518		15	2.74523	0.43742
306	1.97	2.46931	2.862	3.64756	2.34762	5.17092	4.62529	6.69967	7.06513	3.82501	1.19204	1.36824	1.23464	1.26684	1.1358		15	3.12534	0.51522
306.5	2.21613	2.77004	3.07636	4.34874	2.61198	5.72373	5.09661	7.12059	7.65476	4.04027	1.27103	1.40988	1.25051	1.27637	1.15977		15	3.40178	0.56358
307	2.26572	2.92417	3.30001	4.28523	2.57512	6.46173	5.75204	7.62402	8.82134	4.50746	1.27395	1.44472	1.32005	1.30784	1.18901		15	3.67016	0.64436
307.5	2.38515	3.07211	3.61545	4.58768	2.78196	6.82936	6.0232	8.03742	9.00958	4.90418	1.36751	1.50704	1.3882	1.368	1.22977		15	3.87377	0.66935
308	2.60734	3.31518	3.99058	5.34055	2.99306	7.25871	6.50329	8.01389	9.16535	4.99119	1.47768	1.63291	1.43386	1.44359	1.28956		15	4.09712	0.68372
308.5	2.72299	3.51684	4.23743	5.64628	3.16679	7.42414	6.81251	8.15212	9.82531	5.60029	1.50216	1.6881	1.48921	1.49223	1.32137		15	4.30652	0.71925
309	2.82126	3.79082	4.55793	5.96212	3.33579	7.69163	6.96477	8.03382	9.51816	5.34836	1.53665	1.68169	1.5076	1.52596	1.34243		15	4.3746	0.70955
309.5	3.10244	4.06518	5.02726	6.30445	3.68099	8.22853	7.17263	8.05016	9.48471	5.52094	1.59452	1.74142	1.57966	1.53419	1.37083		15	4.56386	0.72042
310	3.3117	4.31548	5.09449	6.58911	3.81984	8.34925	7.58578	8.13431	10.486	5.65926	1.64189	1.73725	1.5895	1.54673	1.39252		15	4.75021	0.76551
310.5	3.31616	4.37753	5.25262	6.76027	3.9744	8.27572	7.43972	8.21078	10.1066	6.02553	1.67231	1.75574	1.56852	1.58547	1.41718		15	4.78257	0.75188
311	3.43912	4.61219	5.62122	6.9854	4.13776	8.04115	7.6123	8.1866	10.1771	6.04542	1.59782	1.77666	1.64056	1.57221	1.42727		15	4.85819	0.75354
311.5	3.60899	4.71581	5.77128	7.38355	4.27711	8.64664	7.6711	8.18333	10.2213	6.23551	1.64079	1.82488	1.63828	1.60588	1.4347		15	4.99061	0.77172
312	3.72552	4.92715	5.93695	7.50815	4.41734	8.06804	7.82614	8.22958	9.91076	6.10703	1.6898	1.79909	1.68717	1.57362	1.44024		15	4.98977	0.75245
312.5	3.76524	5.00626	6.17308	7.47882	4.36398	8.67435	7.69163	8.10735	9.95593	6.15401	1.69976	1.86993	1.686	1.61532	1.48126		15	5.04819	0.75976
313	3.80728	5.10779	6.18197	7.84137	4.50401	8.46475	7.51756	7.81389	9.7694	5.9644	1.71729	1.89795	1.72668	1.63619	1.48612		15	5.02911	0.74275
313.5	3.88097	5.10876	6.33545	7.90516	4.81848	8.32483	7.79321	7.93578	10.1173	5.98622	1.76203	1.94904	1.7012	1.6539	1.48449		15	5.11712	0.75649
314	3.96326	5.27279	6.37496	7.8079	4.699	8.10947	7.83021	7.80752	9.95788	6.30599	1.7365	1.86169	1.75809	1.63244	1.51651		15	5.10895	0.74696
314.5	3.98169	5.60012	6.76787	8.19509	4.96632	8.5668	7.60182	7.78676	10.0426	6.34338	1.78637	1.87143	1.75157	1.66752	1.52589		15	5.23035	0.76304
315	4.19099	5.70784	7.04557	8.86721	5.18256	8.43128	7.76071	7.50147	9.42831	5.91478	1.74905	1.93339	1.77812	1.66337	1.5223		15	5.24513	0.75311
315.5	4.12577	5.87537	7.09172	8.28409	5.42557	8.43018	7.80775	7.38366	9.92199	5.94571	1.76232	1.95395	1.77064	1.68169	1.54797		15	5.26723	0.75394
316	4.18103	6.10131	7.30849	8.68836	5.3477	8.34979	7.62555	7.41699	9.62876	6.12069	1.8211	2.00772	1.79978	1.6862	1.55563		15	5.30927	0.75051
316.5	4.15248	6.02667	7.26881	8.48216	5.54387	8.31989	7.70553	7.50572	9.20515	6.04662	1.84088	2.00273	1.85384	1.73752	1.57112		15	5.2842	0.73287
317	4.33805	6.54894	7.87154	9.40434	5.9199	8.2225	7.80305	7.30719	9.43905	6.07011	1.85041	1.98343	1.81063	1.76641	1.57747		15	5.46087	0.76817
317.5	4.3929	6.62195	7.87307	9.13948	5.86792	8.34458	7.38241	7.32549	9.59458	6.10128	1.80634	1.99304	1.83028	1.75858	1.58023		15	5.44081	0.76317
318	4.26873	6.50626	7.93907	8.80427	6.04966	8.62798	7.93863	7.3732	9.70543	6.24438	1.90689	2.06696	1.83927	1.76929	1.59239		15	5.50883	0.76985
318.5	4.34628	6.46499	7.97592	8.83389	5.96625	8.71193	7.92793	7.04395	9.5958	6.65093	1.93693	2.06749	1.87633	1.78306	1.61168		15	5.51956	0.76519
319	4.38154	6.56012	7.95078	8.63311	6.00944	8.31632	7.34734	7.28088	9.37728	6.27722	1.91987	2.06047	1.87043	1.79202	1.62694		15	5.42692	0.74034
319.5	4.2507	6.66828	8.05175	8.76198	6.07763	8.63978	7.66319	7.27337	9.14973	6.14994	1.88514	2.002	1.82527	1.82287	1.64903		15	5.45804	0.75267
320	4.25645	6.48331	8.10597	8.57017	5.99274	8.19479	7.80818	6.83824	9.25301	6.13292	1.91331	2.12454	1.8761	1.80878	1.63075		15	5.39928	0.73573
320.5	4.25363	6.61733	8.08095	8.74532	6.24346	8.28916	7.64416	6.98317	9.27156	6.41266	1.96241	2.16967	1.91013	1.80372	1.65093		15	5.46922	0.74046
321	4.23139	6.62791	8.17361	8.5602	6.12576	8.3284	7.72692	6.73007	9.11628	6.18445	1.94263	2.09466	1.88203	1.80223	1.6677		15	5.41295	0.73482
321.5	4.24637	6.70739	7.97304	8.71371	6.14513	8.55062	7.62555	6.61781	9.04792	6.25493	1.94656	2.17426	1.9037	1.81646	1.66815		15	5.4261	0.73326
322	4.28359	6.51088	7.96956	8.33378	5.94303	7.9594	7.29602	6.75474	8.83404	6.34074	1.93951	2.13188	1.89499	1.77701	1.66704		15	5.30908	0.70549
322.5	3.98799	5.73518	6.91205	7.20598	5.27437	6.90206	6.49858	6.11716	7.85448	4.99551	1.68218	1.68064	1.6216	1.53148	1.49542		15	4.63298	0.62165
323	3.65914	5.21126	6.39803	6.68224	4.78439	5.61481	5.16546	5.36683	6.72917	4.3133	1.48741	1.43462	1.46616	1.40853	1.35925		15	4.07204	0.54094
323.5	3.64967	5.11435	6.27758	6.28352	4.66975	5.01427	4.37744	4.72206	5.68931	3.64763	1.37282	1.25433	1.28561	1.25322	1.23656		15	3.72321	0.50108
324	3.34845	4.64884	5.71388	5.80805	4.28828	4.17613	3.91917	4.06095	5.22713	3.0824	1.26428	1.18447	1.20673	1.20341	1.17318		15	3.35369	0.44872
324.5	3.265	4.40055	5.45632	5.46045	3.96462	3.38162	3.2432	3.41193	4.27614	2.34674	1.14538	1.08532	1.16684	1.13606	1.11516		15	2.99035	0.40808
325	3.1008	4.1761	5.02679	5.30068	3.621	3.05734	2.94787	3.30408	3.80052	2.48601	1.06083	1.07717	1.08487	1.08727	1.06848		15	2.81332	0.37907
325.5	2.87913	3.79298	4.67161	4.53784	3.4191	2.56104	2.54328	2.70997	3.07709	1.74699	1.04862	1.003	1.04602	1.06008	1.04994		15	2.47645	0.33172
326	2.81198	3.64005	4.34087	4.40812	3.22283	2.18354	1.98514	2.36569	2.37783	1.47109	0.96843	0.97689	0.99052	0.99701	0.98468		15	2.24831	0.31589
326.5	2.64657	3.38178	3.94507	4.26771	2.94394	1.89904	1.71633	2.11634	2.16542	1.56625	0.91162	0.91712	0.94501	0.95618	0.94241		15	2.08805	0.29298
327	2.47623	3.16061	3.66178	3.77985	2.75479	1.66557	1.65111	2.00964	2.24379	1.27836	0.88747	0.88926	0.93116	0.94551	0.90809		15	1.94955	0.26517
327.5	2.41475	2.99613	3.53108	3.44407	2.69401	1.62469	1.63037	1.74706	1.93811	1.21508	0.84254	0.88756	0.94274	0.9204	0.90944		15	1.8492	0.24636
328	2.28913	2.79246	3.23796	3.37786	2.5514	1.28285	1.57306	1.71618	1.57309	1.07053	0.86165	0.82681	0.90193	0.89296	0.88842		15	1.72242	0.23354
328.5	2.19617	2.67469	3.0574	3.14318	2.27726	1.17119	1.41866	1.44608	1.57065	1.01804	0.82534	0.85293	0.86431	0.88085	0.87261		15	1.61796	0.21597
329	2.1275	2.5771	3	2.93941	2.38132	1.15885	1.23389	1.40131	1.21589	0.97441	0.78563	0.80297	0.858	0.85679	0.85084		15	1.54426	0.2118
329.5	2.1775	2.43996	2.74985	2.9555	2.15175	1.20466	1.22213	1.48399	1.52915	1.11416	0.83167	0.82519	0.87304	0.87082	0.85291		15	1.55215	0.19311
330	2.08413	2.41277	2.83316	2.86465	2.29099	1.37668	1.11863	1.15948	1.13044	0.90346	0.82146	0.82491	0.86084	0.86294	0.82871		15	1.49155	0.19987
330.5	1.98301	2.30006	2.52449	2.51307	2.00805	1.10837	1.14836	1.16781	0.95294	0.94852	0.80556	0.85471	0.83775	0.85066	0.84676		15	1.39001	0.17186
331	2.01028	2.29276	2.41428	2.58412	1.95103	1.02222	1.19412	1.27941	1.26521	1.02643	0.79358	0.80735	0.85311	0.87376	0.85027		15	1.41453	0.16698
331.5	1.98582	2.34215	2.48911	2.7345	2.10471	1.00905	0.98605	1.38252	1.32039	0.98568	0.76273	0.8217	0.84201	0.87471	0.85101		15	1.43281	0.18008
332	1.85873	2.12455	2.40398	2.46878	1.8525	1.08395	1.09789	1.30261	1.43783	0.92192	0.82735	0.83204	0.86128	0.86402	0.83528		15	1.38485	0.1553
332.5	1.80379	2.05408	2.14565	2.28793	1.77324	1.13717	1.21529	1.28725	1.27449	1.12279	0.80551	0.79522	0.84412	0.83781	0.82755		15	1.34746	0.13651
333	1.75191	1.86584	2.02667	2.02435	1.75229	1.0716	1.08249	1.20556	1.2867	0.88332	0.78573	0.81173	0.81394	0.83139	0.81837		15	1.26746	0.12419
333.5	1.69392	1.83604	1.93453	1.92553	1.70802	0.84143	0.93622	1.23039	0.97052	0.93774	0.78549	0.81737	0.86172	0.85911	0.8224		15	1.21069	0.11918
334	1.61875	1.73205	1.75898	1.98391	1.56086	0.8203	1.007	1.20425	1.16487	0.82124	0.78779	0.79725	0.80845	0.8588	0.82298		15	1.18317	0.11087
334.5	1.61381	1.73562	1.79589	1.80164	1.54535	0.89877	1.12526	0.99444	1.01886	0.72559	0.78558	0.82702	0.84709	0.83901	0.83311		15	1.15914	0.10615
335	1.5855	1.65279	1.72042	1.69996	1.39652	0.81509	0.90436	1.10621	1.06574	0.94205	0.79325	0.80171	0.84803	0.85522	0.82582		15	1.13418	0.09471
335.5	1.54008	1.73443	1.72601	1.88736	1.52796	0.95034	1.16931	1.1134	0.93121	0.91305	0.78132	0.81538	0.84781	0.8322	0.8309		15	1.17338	0.10215
336	1.63123	1.81518	1.84523	2.17857	1.61848	0.88944	0.80492	1.05817	1.07624	0.86199	0.81155	0.79948	0.81955	0.85406	0.83714		15	1.19342	0.12387
336.5	1.60409	1.71521	1.80402	1.84194	1.55662	0.93443	0.94755	0.94804	0.96197	0.84329	0.79928	0.82775	0.83252	0.84065	0.83735		15	1.15298	0.10637
337	1.61104	1.73436	1.76681	1.90117	1.47805	0.97064	0.89837	1.02908	0.85357	0.98664	0.78803	0.79267	0.83933	0.86493	0.83294		15	1.15651	0.10618
337.5	1.54445	1.68042	1.68362	1.67647	1.49337	0.98985	0.93258	1.09493	1.07477	0.89747	0.79191	0.80196	0.82321	0.83837	0.82132		15	1.14298	0.09316
338	1.48615	1.57457	1.6085	1.60285	1.3978	0.88971	0.86672	1.02042	0.89947	0.94948	0.78692	0.80711	0.84005	0.83752	0.83426		15	1.09344	0.08543
338.5	1.44101	1.51855	1.46744	1.55386	1.32121	0.82579	0.90436	0.96471	0.85406	0.94397	0.77049	0.81449	0.86793	0.84629	0.8281		15	1.06148	0.0774
339	1.48538	1.57285	1.5461	1.54019	1.34681	1.10233	0.9668	1.12402	0.87725	0.89267	0.79325	0.83577	0.85037	0.84554	0.83165		15	1.1074	0.07865
339.5	1.47129	1.54052	1.46544	1.58192	1.41075	0.99616	1.03245	1.05131	0.84722	0.81477	0.76446	0.82503	0.84649	0.85863	0.81438		15	1.08805	0.0801
340	1.39933	1.42327	1.35865	1.52738	1.23177	0.88121	0.80941	0.95147	0.85747	0.80038	0.83751	0.81874	0.84176	0.857	0.82345		15	1.02792	0.07025
340.5	1.33921	1.47661	1.33157	1.36248	1.21201	1.03402	1.00893	1.07173	0.88702	0.91257	0.78515	0.83801	0.83069	0.86269	0.83235		15	1.05233	0.06025
341	1.37893	1.486	1.30719	1.4005	1.25065	0.98436	0.81112	1.06618	0.9505	0.69779	0.77054	0.82393	0.84699	0.85103	0.83609		15	1.03079	0.06808
341.5	1.31604	1.34625	1.32927	1.3995	1.17366	0.93169	0.9343	0.86879	1.11677	0.75436	0.79957	0.83906	0.85093	0.83089	0.83985		15	1.02206	0.0599
342	1.31467	1.33358	1.31673	1.29583	1.29314	0.99973	0.96915	0.94118	0.78911	0.85144	0.80369	0.83541	0.8304	0.8541	0.84061		15	1.01792	0.05737
342.5	1.34066	1.38163	1.32438	1.57807	1.22248	0.92154	0.99781	0.92141	0.74223	0.76347	0.82242	0.81169	0.84459	0.83696	0.83677		15	1.02307	0.06975
343	1.26528	1.4188	1.1523	1.26166	1.07187	0.80823	0.85881	0.97124	0.84331	0.87997	0.81993	0.83561	0.85093	0.8571	0.83283		15	0.98186	0.05183
343.5	1.31194	1.3341	1.23131	1.4351	1.12692	0.95528	0.71917	0.90114	0.7647	0.6695	0.83473	0.82146	0.8515	0.86771	0.83811		15	0.97751	0.06326
344	1.32909	1.37858	1.34069	1.51912	1.15874	0.93882	0.80321	0.875	0.80107	0.88476	0.83828	0.8196	0.82198	0.86328	0.84549		15	1.01451	0.06558
344.5	1.28186	1.31555	1.1954	1.31563	1.15439	0.99753	0.92916	0.90278	0.81011	0.82076	0.83555	0.86011	0.86595	0.87042	0.83108		15	0.99908	0.05039
345	1.13963	1.25909	1.11651	1.19288	1.10429	0.78025	0.94135	0.93497	0.63896	0.74333	0.7691	0.82183	0.81706	0.85638	0.83038		15	0.92973	0.04852
345.5	1.27283	1.25663	1.17567	1.1926	1.14975	0.86337	0.91655	0.80556	0.80986	0.91281	0.81442	0.80848	0.83718	0.8583	0.83951		15	0.96757	0.04708
346	1.19107	1.26103	1.17091	1.244	1.13166	0.94705	0.99802	0.94657	0.87872	0.91233	0.7954	0.78853	0.84349	0.8708	0.84135		15	0.98806	0.04307
346.5	1.24833	1.29425	1.2087	1.33485	1.19442	0.82222	0.88083	0.91781	0.62675	0.86654	0.8047	0.83545	0.8527	0.84082	0.8437		15	0.97147	0.05673
347	1.17432	1.26497	1.18568	1.28402	1.09272	0.68807	0.91697	0.87042	0.87945	0.94469	0.79813	0.8449	0.8592	0.86404	0.84336		15	0.9674	0.04754
347.5	1.25135	1.26855	1.23184	1.30566	1.13087	0.83868	0.97471	0.93088	0.77641	0.98951	0.81078	0.85122	0.85346	0.85451	0.84363		15	0.99414	0.04907
348	1.18059	1.19823	1.15583	1.14446	1.00111	1.00357	1.00401	0.95768	0.87652	0.82939	0.82755	0.87211	0.85809	0.86877	0.84878		15	0.97511	0.0352
348.5	1.1979	1.18206	1.11262	1.20755	1.08047	0.85487	1.17936	1.04036	0.69487	0.77905	0.83478	0.83156	0.86112	0.87705	0.84739		15	0.97207	0.04541
349	1.22914	1.27756	1.16861	1.20926	1.15716	0.80686	1.08271	0.93464	0.8272	0.86966	0.81892	0.82994	0.86711	0.85271	0.84527		15	0.98512	0.04595
349.5	1.20757	1.17975	1.2193	1.23802	1.1706	0.89438	1.08335	0.89461	0.78545	0.76515	0.85562	0.82673	0.82599	0.87898	0.84548		15	0.97806	0.0464
350	1.20601	1.27406	1.13964	1.12282	1.10014	0.86557	0.97578	0.93546	0.87725	0.79223	0.82424	0.835	0.8585	0.86841	0.85645		15	0.96877	0.04051
350.5	1.15902	1.17744	1.13329	1.10288	0.98846	0.74815	0.87292	1.07059	1.03327	0.88979	0.83665	0.83468	0.85724	0.85843	0.85413		15	0.96113	0.03626
351	1.15557	1.16016	1.07671	1.13535	0.97838	0.907	0.80128	0.8848	0.82525	0.93678	0.82702	0.87426	0.87616	0.87061	0.86125		15	0.94471	0.03249
351.5	1.1022	1.17782	1.04586	1.06714	0.9941	0.907	0.9993	0.92761	0.93487	1.00677	0.83363	0.82138	0.86695	0.8604	0.84852		15	0.95957	0.02778
352	1.14533	1.17022	1.06682	1.1513	1.04035	1.01591	0.99952	0.93399	0.65775	0.83179	0.8298	0.84101	0.84459	0.86806	0.8688		15	0.95101	0.03818
352.5	1.11991	1.11681	1.05422	1.0801	1.01633	0.88121	0.7722	0.9031	0.87457	0.85384	0.87291	0.83837	0.86557	0.86694	0.86597		15	0.93214	0.02904
353	1.09582	1.14765	1.02384	1.28117	0.99429	0.9262	0.89644	0.76912	0.92779	0.82819	0.8617	0.80593	0.89445	0.88223	0.85328		15	0.94587	0.03614
353.5	1.16469	1.19659	1.10803	1.22435	1.12771	0.92044	1.0239	0.85752	0.92755	0.94013	0.83325	0.81566	0.88052	0.86771	0.86026		15	0.98322	0.0371
354	1.15332	1.26788	1.16755	1.27633	1.09826	1.06447	1.05362	0.87745	0.82158	0.84521	0.81423	0.84891	0.87077	0.86381	0.85796		15	0.99209	0.04359
354.5	1.19292	1.27279	1.2518	1.3995	1.24818	0.85734	0.93472	0.86683	0.87969	0.8361	0.87047	0.85686	0.9001	0.87531	0.86489		15	1.00717	0.05165
355	1.1638	1.33202	1.14971	1.19573	1.02898	0.92236	0.89131	0.84902	0.93121	0.75484	0.83478	0.8659	0.86853	0.86877	0.86582		15	0.96819	0.04291
355.5	1.13601	1.28278	1.12722	1.11983	1.04776	0.81015	0.93986	0.85327	0.84356	0.67837	0.85864	0.88845	0.85885	0.87241	0.87035		15	0.94583	0.04151
356	1.11381	1.14549	1.00288	1.07967	1.00882	0.93388	0.99717	0.86275	0.7581	0.81333	0.8401	0.88841	0.86383	0.85936	0.86808		15	0.93571	0.02999
356.5	1.0981	1.1209	1.0259	0.99893	0.9178	0.80713	0.98113	0.8348	0.61845	0.85192	0.8264	0.85285	0.88749	0.86541	0.863		15	0.90335	0.03275
357	1.05136	1.10131	1.00483	1.06116	0.98095	0.82579	0.95226	0.92565	0.75151	1.01612	0.8321	0.8582	0.87421	0.89489	0.86696		15	0.93315	0.0261
357.5	1.06895	1.12418	1.01201	1.03738	1.03076	0.95254	0.98113	0.69346	1.01666	0.8373	0.85883	0.83744	0.85743	0.87805	0.86125		15	0.93649	0.02978
358	1.02642	1.14683	1.02796	1.12111	0.99518	0.82469	0.88361	0.87173	0.86626	0.7359	0.89145	0.85114	0.84273	0.86191	0.88268		15	0.92198	0.02978
358.5	1.04221	1.08127	1.03721	1.0969	0.98085	0.87407	0.77156	0.86601	0.95538	1.05184	0.81634	0.85212	0.86516	0.87533	0.86657		15	0.93552	0.02717
359	0.98313	1.14951	0.98452	1.06315	1.01228	0.97257	0.89131	0.8317	0.85625	0.82651	0.83593	0.84202	0.8714	0.85824	0.86155		15	0.92267	0.02551
359.5	1.04988	1.12515	0.9542	1.00605	0.96198	0.94376	0.94563	0.8317	0.86968	0.76922	0.88163	0.88387	0.88547	0.8674	0.88261		15	0.92388	0.02304
360
360.5
361
361.5
362
362.5
363
363.5
364
364.5
365	0.9801	0.9614	0.98337	0.91922	0.90769	1.05688	1.06831	0.9317	1.21736	0.97805	0.86917	0.88891	0.89788	0.89482	0.88418		15	0.9626	0.02399
365.5	0.9569	0.90261	0.94408	0.77156	0.98718	0.92371	0.89394	0.97709	1.04166	1.02104	0.87749	0.87302	0.86418	0.89157	0.88589		15	0.9208	0.01784
366	0.97793	0.90673	0.97176	0.90602	0.95802	0.65737	0.86885	0.93873	0.97325	0.99551	0.86223	0.86344	0.87278	0.8887	0.86873		15	0.90067	0.02128
366.5	0.93911	0.82772	0.89708	0.83636	0.97203	0.88758	1.08997	1.06452	0.90377	0.74461	0.86622	0.85984	0.87849	0.89055	0.88642		15	0.90295	0.02255
367	0.99936	0.91175	0.99831	0.89115	1.0256	0.72095	0.94306	0.95721	0.93997	1.04918	0.90866	0.86307	0.87736	0.90128	0.87475		15	0.92411	0.02075
367.5	0.97187	0.93893	0.96923	0.94244	0.97446	0.97925	1.14917	0.97937	0.94663	0.82225	0.90093	0.88981	0.8655	0.88136	0.86687		15	0.93854	0.01978
368	0.91197	0.92305	0.95543	0.93258	0.95339	0.92193	1.07839	0.93909	1.18435	1.04735	0.89675	0.90586	0.88332	0.87692	0.87015		15	0.95203	0.02238
368.5	0.97464	0.91968	0.95802	0.82877	0.93673	0.6393	1.02434	1.02159	0.94077	0.983	0.92314	0.90492	0.90019	0.88297	0.87295		15	0.91407	0.02402
369	0.97235	1.00094	0.97879	0.89282	0.95617	0.72362	1.08204	0.94647	0.97617	1.06846	0.87567	0.87539	0.86563	0.88231	0.8847		15	0.9321	0.02319
369.5	0.98889	0.96499	1.05971	0.88751	1.08809	0.82356	1.00483	0.95422	0.81592	1.02964	0.8998	0.87789	0.87607	0.88105	0.88208		15	0.93562	0.02177
370	1.02858	0.98094	0.99386	0.96991	0.99818	0.95717	1.02885	0.98148	0.99481	0.81235	0.86617	0.84362	0.87365	0.89802	0.87566		15	0.94022	0.01838
370.5	1.01707	1.02535	1.04895	1.07827	1.07582	1.08008	1.06038	1.03145	0.9248	1.09842	0.91871	0.87732	0.89077	0.90089	0.88268		15	0.99406	0.02163
371	1.0449	0.9736	1.06893	0.874	0.92944	1.00357	1.08826	1.1414	0.89498	0.97414	0.89926	0.90033	0.8783	0.88719	0.88071		15	0.9626	0.02275
371.5	0.99386	0.90845	1.02851	0.9602	0.98475	0.99264	0.98123	0.99609	1.19739	1.02677	0.91103	0.90836	0.86443	0.90394	0.87988		15	0.96917	0.0213
372	1.02932	0.95975	1.10225	1.0159	0.99019	1.09748	0.87357	0.87294	0.96579	1.21409	0.8479	0.87527	0.88758	0.89144	0.87399		15	0.9665	0.02795
372.5	1.03139	1.03688	0.96505	1.07402	0.90838	0.99286	1.02756	1.11396	0.95328	1.02807	0.86947	0.87834	0.88503	0.87835	0.8791		15	0.96812	0.02109
373	1.01789	1.00902	1.02207	0.9734	1.07154	1.0687	1.02842	0.96196	0.98789	1.04579	0.88488	0.89832	0.88486	0.89416	0.88547		15	0.97562	0.01802
373.5	0.96958	0.98334	1.06568	1.03972	1.15058	1.01227	0.95786	0.98043	1.07334	0.97727	0.88759	0.88244	0.88961	0.8641	0.88455		15	0.97456	0.02168
374	0.98114	0.97076	0.9472	0.91285	0.8695	0.92617	0.98617	0.94366	0.98549	0.94887	0.88798	0.87081	0.87041	0.8933	0.88079		15	0.92501	0.01145
374.5	0.90837	1.00715	0.94633	0.91057	0.87968	1.07473	0.96944	0.92519	0.85665	0.98013	0.88641	0.8851	0.84624	0.89272	0.87809		15	0.92312	0.01608
375	0.90941	0.96402	0.91162	0.78962	0.95444	1.07651	1.04536	0.85341	0.93917	0.87826	0.91462	0.88244	0.85797	0.88358	0.88455		15	0.91633	0.01886
375.5	1.03087	1.00543	1.12748	1.14505	1.21121	1.28307	1.05072	1.13348	1.039	1.06585	0.88961	0.95774	0.89516	0.90934	0.90008		15	1.04294	0.03123
376	1.13294	1.11027	1.28718	1.38089	1.19605	1.4729	1.42713	1.34864	1.54692	1.2253	0.98031	0.98738	0.92705	0.95209	0.91193		15	1.19247	0.05493
376.5	1.20597	1.28573	1.50775	1.53917	1.43466	1.94223	1.43421	1.83331	1.75536	1.18023	0.98326	1.02018	0.96226	0.98987	0.93728		15	1.3341	0.08639
377	1.32514	1.34422	1.62192	1.75194	1.45017	2.69842	1.77823	2.44905	2.52735	1.57077	1.00444	1.07423	0.98921	1.00018	0.9672		15	1.57016	0.15052
377.5	1.37881	1.58805	1.94212	2.1441	1.54726	3.11532	2.30971	2.92211	3.18967	1.83704	1.03625	1.1915	1.05386	1.06227	0.99404		15	1.82081	0.19885
378	1.55001	1.79998	2.26405	2.4326	1.79061	4.15258	2.66209	3.88107	4.04898	2.3146	1.06441	1.21898	1.08834	1.1074	1.04299		15	2.16125	0.28527
378.5	1.78844	2.04785	2.48097	2.95011	1.95551	4.79188	3.40332	4.73501	5.17024	2.9008	1.15117	1.30611	1.12036	1.17574	1.08219		15	2.53731	0.36811
379	1.94055	2.17157	2.85739	3.21417	2.09402	5.46844	3.7881	5.80939	6.12884	3.20172	1.19736	1.37056	1.17936	1.21692	1.1117		15	2.85001	0.45124
379.5	2.07162	2.35923	3.08539	3.64442	2.40588	5.90274	4.37469	6.50622	6.89844	3.44011	1.22134	1.41216	1.21032	1.27301	1.13997		15	3.1297	0.51235
380	2.28069	2.55873	3.31068	3.90591	2.50991	6.08053	4.93834	7.25496	7.97098	3.7835	1.29816	1.48542	1.23635	1.30502	1.18021		15	3.40663	0.57962
380.5	2.36077	2.74827	3.5181	4.17058	2.5459	6.23823	5.35271	7.39711	8.44084	4.26549	1.35321	1.51637	1.28494	1.36049	1.21486		15	3.58452	0.60742
381	2.56825	3.00049	3.82277	4.49793	2.80337	6.25296	5.5629	7.76796	8.88247	4.32411	1.32494	1.5556	1.33927	1.38224	1.24466		15	3.75533	0.63312
381.5	2.62599	3.08803	4.122	4.66593	3.0061	6.52911	6.1971	8.30048	9.24557	4.99603	1.37586	1.5463	1.34889	1.41363	1.27584		15	3.98246	0.67764
382	2.78659	3.25121	4.2912	5.12183	3.09903	6.14187	6.47743	8.19299	9.5754	4.86185	1.43199	1.63524	1.39047	1.4439	1.29668		15	4.06651	0.67997
382.5	2.89173	3.53368	4.3064	5.25295	3.33682	6.44457	6.60161	8.08761	9.62997	5.20498	1.5091	1.69768	1.41104	1.47236	1.31642		15	4.17979	0.68126
383	2.98337	3.6377	4.54031	5.28209	3.31322	6.74816	7.13651	8.37155	10.1698	5.77346	1.51964	1.69711	1.42439	1.46673	1.34969		15	4.36092	0.72658
383.5	3.16076	3.86992	4.69616	5.66832	3.43738	6.5184	7.25534	8.43858	9.56822	5.54836	1.54288	1.74977	1.48463	1.54477	1.3677		15	4.39008	0.69847
384	3.31603	4.17336	5.11374	6.02496	3.62901	7.04439	7.67914	8.12614	10.0522	5.63538	1.65323	1.73715	1.49767	1.5603	1.39269		15	4.57569	0.72301
384.5	3.45593	4.16355	5.24211	6.27644	3.961	7.205	8.28054	8.50666	10.3431	6.75855	1.66426	1.79329	1.58112	1.57283	1.43146		15	4.81572	0.76371
385	3.58544	4.41203	5.51226	6.50651	4.01805	7.37163	8.01909	8.23679	10.2132	6.61578	1.69425	1.83968	1.55934	1.56801	1.45558		15	4.84051	0.74821
385.5	3.72236	4.7628	5.90156	7.11204	4.48289	6.99063	7.81255	8.21832	10.2063	6.27682	1.70415	1.84456	1.55851	1.61847	1.47782		15	4.91265	0.73868
386	3.81123	4.79238	6.11556	6.90792	4.51633	7.28418	7.59678	8.2192	10.0122	6.24529	1.76649	1.84411	1.59422	1.65033	1.48117		15	4.9225	0.72735
386.5	3.83278	4.92732	6.20756	7.41693	4.49261	7.37586	7.89169	8.1286	10.004	5.99935	1.78037	1.94258	1.66624	1.65087	1.53034		15	4.98981	0.73303
387	3.99152	5.04819	6.4886	7.50525	4.6464	7.06179	7.7763	7.67208	9.52589	6.4149	1.82188	1.94377	1.67612	1.71572	1.52318		15	4.98744	0.7057
387.5	4.07653	5.23518	6.82871	7.67872	5.04747	7.22842	7.83464	7.92013	10.1222	6.08064	1.82981	1.93312	1.68178	1.70333	1.58432		15	5.119	0.73404
388	4.06744	5.32699	6.79294	7.75915	4.88466	6.82043	7.55517	7.93684	9.50433	6.18667	1.89899	1.98468	1.72633	1.72925	1.61305		15	5.05246	0.70216
388.5	4.13168	5.42135	6.82739	7.58098	5.03683	6.88401	7.73426	7.61121	9.89964	6.17	1.87629	1.99328	1.76138	1.73434	1.60031		15	5.0842	0.70898
389	4.23418	5.57217	7.07889	7.84277	5.21873	6.87151	7.80375	7.41118	9.63583	6.02905	1.87925	2.03254	1.76476	1.75645	1.65028		15	5.11876	0.70249
389.5	4.21609	5.50754	7.205	8.03445	5.37484	6.69931	7.55324	7.36808	9.18142	6.18042	1.8756	1.99504	1.71043	1.81407	1.63743		15	5.0902	0.6898
390	4.29249	5.69806	7.12807	8.05539	5.29731	6.95851	7.51399	7.48313	9.09756	6.15333	1.95601	2.03041	1.73282	1.81174	1.63802		15	5.12312	0.68793
390.5	4.41114	6.02943	7.63552	8.40536	5.74455	6.69039	7.44	7.31935	9.20831	6.24972	1.91076	2.05154	1.76874	1.78905	1.67139		15	5.22168	0.70135
391	4.36824	6.15868	7.69779	8.41067	5.63381	6.84698	7.58113	7.4534	8.75576	6.00091	1.90357	2.05093	1.79434	1.82391	1.69178		15	5.21146	0.69411
391.5	4.38768	6.12222	7.86114	8.24843	5.83586	6.87018	7.34413	7.26041	9.41595	6.04129	1.94892	2.10289	1.80456	1.8501	1.67077		15	5.25097	0.70283
392	4.48434	6.4318	8.01201	8.58171	6.09529	6.8269	7.24826	7.08853	8.86304	5.92353	1.97423	2.1196	1.85774	1.85599	1.71326		15	5.27175	0.693
392.5	4.46148	6.39712	7.9534	8.67079	6.16507	6.92884	7.55989	7.1012	8.84467	6.03244	2.028	2.16861	1.85774	1.85381	1.71815		15	5.31608	0.6977
393	4.52715	6.47605	8.05927	8.35725	6.18278	6.94223	7.29115	6.97946	9.22827	6.3852	1.99816	2.1752	1.89951	1.82826	1.71034		15	5.33602	0.7002
393.5	4.40941	6.28989	7.90355	8.41158	5.83991	6.71916	7.30853	7.10331	8.82044	5.96105	1.98502	2.18011	1.88803	1.87905	1.72075		15	5.22799	0.68123
394	4.36183	6.22578	7.89293	8.20488	5.94301	7.01718	7.32718	6.96081	8.58459	5.74767	2.02204	2.17762	1.8988	1.88691	1.75382		15	5.20034	0.66995
394.5	4.36331	6.36724	8.10999	8.46834	6.17363	6.66429	7.32375	6.73563	8.74591	5.88758	2.07552	2.17655	1.91437	1.85403	1.75425		15	5.24096	0.6795
395	4.3156	6.3796	8.14052	8.5682	6.15304	6.54272	7.11035	6.75041	8.89844	5.87638	2.00195	2.11468	1.91745	1.87577	1.76552		15	5.22738	0.6846
395.5	3.98991	5.62227	7.01988	7.16212	5.22186	5.42828	5.92236	5.89999	7.00413	4.36371	1.74896	1.75116	1.62803	1.57028	1.54668		15	4.39197	0.56532
396	3.7485	5.29996	6.6562	6.6478	4.85839	5.07807	5.20987	5.72353	6.32317	4.05497	1.55825	1.44517	1.42868	1.41225	1.39058		15	4.05569	0.53503
396.5	3.52774	4.70858	6.00246	5.63236	4.40802	4.33281	4.58466	4.95422	5.78917	3.51593	1.38812	1.33903	1.31356	1.31034	1.29435		15	3.60676	0.4666
397	3.24274	4.28861	5.38754	5.10665	3.88394	3.65425	3.73448	4.14391	5.03128	2.74787	1.24296	1.23761	1.23715	1.20393	1.21923		15	3.15748	0.40491
397.5	3.19145	4.24203	5.16266	5.17646	3.9315	3.05755	3.18949	3.77323	3.76414	2.58477	1.18298	1.10302	1.12907	1.1103	1.12614		15	2.91499	0.38191
398	2.98211	3.73947	4.69158	4.41811	3.45393	2.68012	2.83625	3.00303	3.33209	1.98945	1.08396	1.01228	1.02634	1.05471	1.0593		15	2.55752	0.33107
398.5	2.86212	3.60849	4.32053	4.09075	3.30315	2.2108	2.41909	2.78612	2.87475	1.86595	0.97282	0.98165	0.99168	0.9854	0.99165		15	2.351	0.30638
399	2.68928	3.34878	4.00863	3.73791	3.12876	2.04015	2.22649	2.69886	2.63836	1.6953	0.94643	0.89448	0.95353	0.96242	0.95507		15	2.19496	0.28192
399.5	2.72945	3.39851	4.09412	4.2152	3.19669	2.02521	2.13212	2.50394	2.55637	1.60307	0.87607	0.86278	0.89697	0.93537	0.91617		15	2.19614	0.30438
400	2.67499	3.41147	3.99867	4.09136	2.97706	1.87709	1.80397	2.29195	2.28271	1.43763	0.85913	0.87585	0.90046	0.91045	0.91311		15	2.08706	0.29548
400.5	2.50513	2.98289	3.58388	3.6083	2.70952	1.4961	1.47517	2.05427	2.03407	1.16173	0.87567	0.88919	0.88813	0.90899	0.91965		15	1.87285	0.25732
401	2.39969	2.85528	3.24171	3.34332	2.55434	1.54049	1.43528	1.83824	1.8448	0.96815	0.79236	0.80992	0.86289	0.86835	0.87139		15	1.74841	0.23867
401.5	2.26061	2.55109	2.96007	2.84023	2.32175	1.42003	1.2356	2.0124	1.81472	1.13333	0.83391	0.80865	0.83581	0.83929	0.86186		15	1.64862	0.20394
402	2.30567	2.78661	3.12602	3.06059	2.43724	1.24269	1.43399	1.70559	1.5746	0.95825	0.78748	0.83936	0.83517	0.83706	0.83603		15	1.65109	0.22465
402.5	2.13352	2.4136	2.82898	2.66024	2.17086	1.37743	1.28214	1.50644	1.38373	1.05074	0.84613	0.8062	0.83081	0.8437	0.83857		15	1.53154	0.18627
403	2.06517	2.30846	2.64472	2.63778	2.17005	1.32054	1.09619	1.43836	1.17822	0.81834	0.82303	0.82155	0.82908	0.84859	0.83105		15	1.45541	0.18264
403.5	2.04266	2.26869	2.61047	2.72186	2.05306	1.20477	1.15389	1.39931	1.23679	0.91422	0.80708	0.80456	0.81834	0.82857	0.82888		15	1.44621	0.18038
404	1.89812	2.13914	2.4416	2.25534	1.99404	1.07093	1.18284	1.27053	1.30627	0.86758	0.80235	0.81762	0.80177	0.82972	0.82588		15	1.36692	0.15616
404.5	1.91747	1.91366	2.19422	2.16535	1.912	1.03569	1.12472	1.27369	1.02808	0.89364	0.80964	0.78302	0.80029	0.84253	0.82484		15	1.30126	0.14165
405	1.82462	1.97057	2.25874	2.19433	1.81167	0.94646	0.82788	1.18872	0.94636	0.85169	0.7731	0.82409	0.79178	0.82811	0.82433		15	1.2575	0.14762
405.5	1.92323	1.94788	2.30042	2.2687	1.95238	1.04506	1.21802	1.365	0.9602	0.94939	0.7963	0.79678	0.81781	0.84108	0.82194		15	1.33361	0.14879
406	1.82709	1.89216	2.25681	2.07398	1.94231	0.85858	1.00954	1.19541	0.97644	0.97023	0.78088	0.82536	0.80724	0.83978	0.80655		15	1.27083	0.14208
406.5	1.82549	1.8524	2.13634	2.17566	1.92611	0.87709	1.05373	1.23833	1.09064	1.01166	0.78704	0.80415	0.82295	0.82782	0.81727		15	1.28311	0.13798
407	1.80242	1.8491	2.12074	2.03346	1.74444	0.7495	1.00761	1.27264	0.93225	0.71309	0.82515	0.81078	0.82424	0.83917	0.81309		15	1.22251	0.13597
407.5	1.71632	1.72801	2.02642	1.76409	1.61646	0.87977	1.02971	1.1502	1.01477	0.94001	0.76808	0.80963	0.81356	0.8344	0.80761		15	1.19327	0.11404
408	1.63304	1.65088	1.81381	1.64617	1.59991	0.94981	1.23603	1.07824	1.04299	0.85534	0.80004	0.801	0.81106	0.81999	0.81616		15	1.1703	0.09994
408.5	1.63295	1.61096	1.76961	1.71249	1.3282	0.67254	0.92311	1.07912	1.0563	0.80818	0.77488	0.8143	0.81444	0.82922	0.81589		15	1.10948	0.10104
409	1.63715	1.63186	1.72387	1.65527	1.4651	0.73009	0.97973	1.07015	0.9059	0.68938	0.80476	0.78789	0.81276	0.83696	0.80979		15	1.10271	0.10191
409.5	1.53309	1.46853	1.69998	1.54206	1.36269	0.66763	1.06402	1.04323	0.92719	0.83892	0.79708	0.81045	0.80268	0.83395	0.81012		15	1.08011	0.08864
410	1.43097	1.3416	1.55149	1.56467	1.38676	0.8211	0.8993	1.07789	0.72168	0.90015	0.7894	0.80255	0.79233	0.83296	0.80869		15	1.0481	0.08068
410.5	1.43041	1.31935	1.4889	1.33809	1.1758	0.80393	1.01619	1.15899	1.02729	0.67036	0.81594	0.81615	0.81875	0.84129	0.82857		15	1.03667	0.06831
411	1.33678	1.28513	1.35156	1.19361	1.26167	0.82222	0.8371	1.04482	0.97032	0.68573	0.79482	0.81021	0.82136	0.83912	0.81326		15	0.99118	0.05991
411.5	1.24757	1.18044	1.27244	1.132	1.27659	0.6654	0.91088	0.97673	0.92134	0.63154	0.80235	0.81705	0.79829	0.83741	0.82821		15	0.95322	0.05609
412	1.3202	1.24334	1.43951	1.32033	1.2906	0.66362	0.96922	1.04147	0.66338	0.81131	0.80225	0.80751	0.81806	0.83692	0.82073		15	0.9899	0.06807
412.5	1.23999	1.24147	1.30968	1.02819	1.05823	0.9333	1.09941	1.09425	1.03288	0.90718	0.84051	0.80951	0.82356	0.82652	0.81186		15	1.00377	0.04403
413	1.25311	1.13236	1.22213	1.13579	1.09769	0.75396	0.8993	0.97427	1.04778	0.83632	0.75562	0.81406	0.80697	0.84127	0.82359		15	0.95961	0.04487
413.5	1.27423	1.16853	1.30417	1.13215	1.15636	0.71604	0.96043	0.96354	0.89072	0.58412	0.80053	0.79248	0.83495	0.83337	0.82898		15	0.94937	0.05499
414	1.25203	1.11746	1.19804	1.09269	1.11609	0.66763	0.88515	0.98729	0.78397	0.76728	0.81619	0.81332	0.83284	0.82275	0.82158		15	0.93162	0.04644
414.5	1.27523	1.22507	1.39883	1.18891	1.15254	0.73901	0.90574	0.94507	0.78344	0.86472	0.80019	0.8412	0.83693	0.84172	0.83064		15	0.97528	0.0546
415	1.24008	1.17175	1.35103	1.25781	1.11389	0.76489	0.77147	1.00224	0.7475	0.84856	0.79984	0.80828	0.82323	0.83723	0.81905		15	0.95712	0.0545
415.5	1.25648	1.15595	1.26488	1.05642	1.18298	0.87419	0.89244	1.042	0.93944	0.76311	0.80787	0.82741	0.82119	0.83426	0.83273		15	0.97009	0.04507
416	1.18156	1.11731	1.19379	1.08434	1.11332	0.67544	0.87357	0.94859	0.83722	1.02416	0.80476	0.82311	0.81641	0.83663	0.82406		15	0.94362	0.04188
416.5	1.21476	1.10787	1.2595	1.20317	1.15833	0.71381	0.91668	0.98799	1.00093	0.80818	0.81924	0.82425	0.82158	0.8358	0.82058		15	0.96618	0.04653
417	1.17182	1.11933	1.20812	1.05809	1.04122	0.61187	0.90895	0.97603	0.71716	0.64196	0.783	0.81529	0.82339	0.85342	0.83841		15	0.90454	0.04797
417.5	1.20134	1.11559	1.24178	1.33551	1.11332	0.78876	0.79378	0.90373	0.67377	0.92725	0.77842	0.81639	0.83364	0.84327	0.83251		15	0.9466	0.05193
418	1.2583	1.15146	1.27019	1.09952	1.17233	0.71269	0.95185	1.12961	0.89179	0.8272	0.84169	0.7996	0.83213	0.83193	0.83354		15	0.97359	0.04803
418.5	1.24324	1.09335	1.26083	1.1285	1.12489	0.72585	0.97609	1.0471	0.80474	0.89807	0.83111	0.81004	0.83707	0.85032	0.82769		15	0.96393	0.04463
419	1.19433	1.05972	1.1225	1.00618	1.16157	0.7834	1.03292	0.99081	0.80873	0.91474	0.79767	0.8342	0.82331	0.85647	0.84274		15	0.94862	0.0365
419.5	1.22419	1.13214	1.3061	1.20181	1.17083	0.79366	0.91239	0.90918	0.81911	0.91578	0.81511	0.8297	0.84094	0.84094	0.82816		15	0.96934	0.04674
420	1.31856	1.16419	1.35077	1.23793	1.16851	0.80393	0.77748	0.95897	0.78238	0.9236	0.82924	0.84743	0.84157	0.84226	0.84231		15	0.97927	0.05346
420.5	1.25107	1.07238	1.23799	1.21364	1.12848	0.77024	0.92011	1.0895	0.93385	0.82069	0.82308	0.8114	0.85163	0.85964	0.83743		15	0.97474	0.04452
421	1.18433	1.06938	1.1596	1.03229	1.10441	0.75619	0.98445	0.92202	0.79755	0.8285	0.79733	0.85263	0.84325	0.84007	0.83681		15	0.93392	0.03693
421.5	1.17433	1.03711	1.13564	1.0725	1.13079	0.75418	0.92869	1.00559	0.86197	0.82225	0.84623	0.8195	0.8305	0.86259	0.85036		15	0.94215	0.03551
422	1.21177	1.07807	1.25319	1.16235	1.03474	0.83872	0.95507	0.94753	0.73659	0.82329	0.8125	0.8521	0.84795	0.84531	0.84765		15	0.94979	0.0416
422.5	1.17896	1.01681	1.22167	1.01939	1.04041	0.85367	1.03035	0.96108	0.89924	0.89468	0.83697	0.82036	0.84572	0.8437	0.84954		15	0.95417	0.03286
423	1.24289	1.16067	1.3061	1.18284	1.10799	0.73031	1.05887	0.99222	0.93012	0.72741	0.78852	0.84387	0.84913	0.85335	0.83922		15	0.97423	0.0492
423.5	1.17047	1.1221	1.20036	1.21774	1.04446	0.62614	0.81223	0.92061	0.73792	0.80401	0.82564	0.86598	0.8419	0.85638	0.84572		15	0.92611	0.04669
424	1.15961	1.09499	1.1683	1.32428	1.08682	0.80281	0.80021	0.84127	0.85612	0.80193	0.85588	0.83334	0.84817	0.8488	0.84892		15	0.94476	0.04424
424.5	1.18151	1.12001	1.16432	1.20879	1.10973	0.74258	0.84054	0.82438	0.97857	0.82564	0.83657	0.82339	0.85558	0.87272	0.85472		15	0.94927	0.04145
425	1.08866	1.08271	1.15071	1.10893	1.01172	0.72875	0.86928	1.08792	0.77226	0.75347	0.84549	0.86065	0.85113	0.86216	0.86667		15	0.92937	0.03702
425.5	1.10156	1.03276	1.13093	1.14125	1.00743	0.55253	0.96643	0.94243	0.9067	0.88634	0.85573	0.86499	0.83833	0.87886	0.85139		15	0.93051	0.03807
426	1.14351	1.01794	1.0609	0.9907	0.99679	0.8269	0.92032	0.96565	0.82577	0.60444	0.85908	0.83183	0.85748	0.86657	0.84263		15	0.90737	0.03319
426.5	1.10702	1.04826	1.13889	1.06173	1.12396	0.70756	1.01212	0.83617	0.97937	0.69589	0.85652	0.82802	0.83548	0.84463	0.85071		15	0.92842	0.03808
427	1.0739	0.96327	1.07497	0.9945	1.09631	0.63083	0.92032	0.90724	0.77466	0.74748	0.82018	0.83474	0.83572	0.85482	0.85688		15	0.89239	0.03395
427.5	1.08148	0.99038	0.99811	0.91649	1.02225	0.48829	0.94885	0.86907	0.92213	0.82095	0.85755	0.8548	0.85891	0.86245	0.86268		15	0.89029	0.03467
428	1.0336	0.96027	1.01676	0.96096	1.00038	0.71671	0.8637	0.98096	0.84733	0.88087	0.84701	0.8564	0.85888	0.86847	0.85451		15	0.90312	0.02213
428.5	1.01698	0.98641	1.02997	0.95201	1.0418	0.74905	0.78692	0.84268	0.75496	0.81756	0.82096	0.87449	0.84891	0.85414	0.85804		15	0.88233	0.02547
429	1.0159	0.95526	0.99552	0.84258	1.04377	0.68191	0.96429	0.90619	0.9831	0.80688	0.83854	0.83457	0.85226	0.89435	0.8603		15	0.89836	0.02476
429.5	0.96599	0.97315	0.95636	0.96202	0.91799	0.7002	1.04064	0.88789	0.80873	0.91109	0.83598	0.84448	0.85245	0.87152	0.85226		15	0.89205	0.02148
430	1.02365	1.01344	1.02054	0.96339	1.02236	0.67343	0.87743	0.93064	0.76507	0.84856	0.84411	0.82921	0.84152	0.87752	0.8524		15	0.89222	0.02661
430.5	0.95551	0.94694	0.99147	0.83409	0.96601	0.67209	1.15088	0.94366	0.89738	0.8754	0.85208	0.87261	0.86033	0.88726	0.85907		15	0.90432	0.02636
431	0.95603	0.99914	0.94886	0.88417	0.87725	0.79969	0.88365	0.91674	0.68974	0.80766	0.85819	0.85558	0.85404	0.86488	0.86231		15	0.87053	0.01889
431.5	0.97668	0.84113	0.97003	0.89767	0.90317	0.81441	1.06938	0.90654	0.70358	0.80245	0.85824	0.83891	0.8533	0.87443	0.85737		15	0.87782	0.02195
432	0.92768	0.91302	0.92523	0.90132	0.96624	0.73812	0.87721	0.98641	0.83748	0.72768	0.84938	0.86082	0.86651	0.87466	0.86437		15	0.87441	0.0184
432.5	0.97417	0.91032	0.88958	0.95109	0.95143	0.60004	0.96107	1.04446	0.91202	0.86706	0.84243	0.90909	0.86473	0.88059	0.86282		15	0.89473	0.02514
433
433.5
434
434.5
435
435.5
436
436.5
437
437.5
438	0.97097	0.96215	1.00115	0.97144	0.98964	1.0245	0.97365	1.00163	1.04785	0.97919	0.90268	0.9234	0.92536	0.8874	0.88791		15	0.96326	0.01256
438.5	0.96093	0.96579	1.03894	0.94856	0.90501	0.91165	1.08907	1.04862	0.98829	1.0716	0.88631	0.8963	0.86279	0.87655	0.8776		15	0.9552	0.01975
439	0.99267	0.93797	0.96689	1.1094	0.90236	0.81508	1.05832	0.9765	0.68989	0.93805	0.87428	0.88637	0.87958	0.87156	0.88193		15	0.91872	0.02575
439.5	0.96329	0.92835	0.98615	1.01417	1.02135	0.93765	0.93333	1.00199	1.08457	1.00483	0.88097	0.91789	0.87154	0.87415	0.88721		15	0.95383	0.01645
440	0.98236	0.9442	1.01415	0.9992	1.04825	0.89679	1.04384	1.045	0.88102	1.21782	0.89714	0.89918	0.88601	0.86758	0.87355		15	0.96641	0.02512
440.5	1.01995	0.99846	1.00795	1.05825	1.00316	1.00393	1.15769	0.98229	0.97325	1.10705	0.93202	0.91725	0.89252	0.87862	0.88946		15	0.98812	0.0206
441	0.94081	0.94056	0.97855	1.04025	1.03511	0.94622	1.19378	1.11477	0.95446	1.05198	0.91063	0.90665	0.87241	0.871	0.88422		15	0.97609	0.02422
441.5	0.96106	0.98787	1.00482	0.92433	1.0456	1.10935	1.02624	1.00253	0.97499	0.84785	0.88594	0.89413	0.89314	0.86922	0.87481		15	0.95346	0.01974
442	0.93491	0.96692	1.05547	0.88126	0.89264	1.11249	0.97878	1.02621	1.21238	1.08141	0.90493	0.88718	0.86834	0.88188	0.88452		15	0.97129	0.02704
442.5	0.96565	0.99159	1.05494	1.00475	0.98686	0.92993	1.11937	0.97922	1.02385	0.83393	0.89907	0.86775	0.88338	0.87329	0.88937		15	0.95353	0.02063
443	1.02973	1.02143	1.01328	1.0384	0.96628	0.89136	0.97209	0.92861	0.91658	0.77221	0.91272	0.90813	0.87559	0.88125	0.89665		15	0.93496	0.01871
443.5	1.01152	0.98852	1.05847	1.08198	0.98737	0.8528	1.04829	0.89391	1.10655	1.05103	0.93103	0.89049	0.8885	0.86774	0.88208		15	0.96935	0.0225
444	0.9457	0.9429	0.99055	0.98726	1.08564	1.08707	0.893	0.99169	1.01229	1.0773	0.8782	0.88523	0.8723	0.86289	0.87546		15	0.95916	0.021
444.5	1.05749	0.93061	1.0856	1.02242	1.00568	1.03821	1.06567	0.88578	1.05074	1.1137	0.91189	0.89006	0.90269	0.88039	0.88809		15	0.98193	0.02199
445	1.03697	1.05055	1.07467	1.17283	1.07427	0.83708	1.11536	0.95699	1.00072	0.92381	0.89965	0.90351	0.88264	0.87487	0.87653		15	0.9787	0.02669
445.5	0.95578	1.04375	0.99688	1.06465	1.01629	1.07307	1.03693	0.97289	1.04323	1.02223	0.86968	0.88098	0.88013	0.87509	0.87907		15	0.97404	0.01997
446	1.01109	0.95131	0.95476	0.96993	1.04535	0.93565	1.06032	0.96964	0.99465	1.04629	0.87742	0.87462	0.88128	0.87441	0.87881		15	0.95503	0.01737
446.5	1.01541	1.04634	1.05974	1.00156	0.97651	1.00821	0.92196	1.00325	0.87321	0.86114	0.89782	0.89176	0.89265	0.89324	0.88007		15	0.94819	0.01789
447	1.01772	0.95859	0.98862	0.96387	0.96185	0.98307	0.98078	1.05422	1.08891	1.07034	0.885	0.88255	0.87586	0.88718	0.89196		15	0.96604	0.01837
447.5	0.93557	1.00825	1.01835	0.90498	0.94745	1.0045	1.16549	0.95138	0.95851	1.03901	0.88045	0.90118	0.89298	0.88134	0.87397		15	0.95756	0.02045
448	0.98175	0.98164	0.91743	1.05506	1.01832	1.10192	0.90369	0.99892	0.85991	0.87855	0.89196	0.9027	0.92112	0.891	0.89506		15	0.9466	0.01856
448.5	1.043	0.97768	1.16305	1.0771	1.12959	1.20763	1.16682	1.07934	0.93914	1.04217	0.92266	0.88247	0.9168	0.89415	0.9014		15	1.02287	0.0288
449	1.14746	1.10125	1.34175	1.41493	1.28837	1.37762	1.41235	1.46665	1.40205	1.2694	0.91785	0.93278	0.99155	0.90983	0.91236		15	1.19241	0.05523
449.5	1.20329	1.30902	1.52459	1.71356	1.38373	1.70474	1.62892	1.97235	1.69264	1.69855	1.00221	1.01716	1.06252	0.94809	0.93286		15	1.38628	0.08856
450	1.34202	1.4871	1.80913	2.02818	1.46103	2.12299	1.85061	2.44045	2.45251	1.86502	1.02235	1.1196	1.09455	1.0164	0.97936		15	1.60609	0.13293
450.5	1.49681	1.64141	1.9979	2.40471	1.67222	2.72066	2.43124	3.26767	3.47781	2.32202	1.04112	1.1848	1.14492	1.04011	0.99568		15	1.92261	0.21166
451	1.51179	1.86219	2.13841	2.67962	1.9275	3.16235	2.64223	3.9765	4.47159	2.58818	1.08516	1.26137	1.17736	1.10101	1.04725		15	2.1755	0.27759
451.5	1.62079	1.99393	2.43055	2.9939	2.01794	4.00943	3.29728	4.55286	4.94636	2.92397	1.15969	1.29909	1.20558	1.14489	1.08286		15	2.44528	0.33464
452	1.78968	2.16296	2.58953	3.21565	2.17734	4.80394	4.17067	5.67251	6.22756	3.5237	1.2383	1.42363	1.25979	1.19684	1.12239		15	2.8383	0.43925
452.5	1.94622	2.3793	2.89714	3.59504	2.42958	5.25734	4.76778	6.12091	6.45829	3.55883	1.28354	1.40849	1.33259	1.25125	1.16509		15	3.05676	0.47336
453	2.05592	2.63906	3.34365	4.16202	2.5713	5.95272	5.50014	7.14874	7.85659	4.66588	1.36147	1.45053	1.30886	1.27909	1.19271		15	3.49925	0.58412
453.5	2.19954	2.7911	3.66553	4.4371	2.80106	6.94693	6.80421	7.78529	9.20601	5.08521	1.40959	1.50818	1.39823	1.30403	1.25111		15	3.90621	0.69
454	2.3415	2.9205	3.85983	4.61174	2.78641	7.16949	6.61305	7.6548	8.96603	5.44252	1.44735	1.62522	1.41256	1.37679	1.26572		15	3.96623	0.67594
454.5	2.31173	3.06648	3.97107	4.63344	2.9352	7.33862	7.00719	7.88415	9.32341	5.19851	1.52827	1.7689	1.50454	1.43297	1.36319		15	4.08451	0.69371
455	2.43793	3.23033	4.30741	5.00627	3.18264	7.65517	7.15446	7.51346	9.21498	5.30169	1.65818	1.81001	1.55051	1.46707	1.3672		15	4.19049	0.68465
455.5	2.63886	3.52074	4.51704	5.52866	3.46609	7.958	7.21239	7.51093	9.05768	5.97959	1.65557	1.73976	1.62737	1.49936	1.37773		15	4.35265	0.69103
456	2.815	3.64464	4.7254	5.80257	3.48958	8.10714	7.14154	7.50569	9.18346	5.93655	1.64406	1.8291	1.62783	1.53282	1.4011		15	4.42576	0.69428
456.5	2.95569	3.72592	4.94463	6.03912	3.81142	8.03971	7.52654	7.44135	9.02877	6.08276	1.7153	1.83105	1.62521	1.54314	1.41697		15	4.51517	0.69271
457	2.999	3.74735	5.02841	6.20114	3.86801	7.98372	7.56219	7.55106	9.58624	6.46475	1.74176	1.87474	1.66981	1.57538	1.45626		15	4.62065	0.71399
457.5	3.12406	4.06057	5.15879	6.1939	3.95124	8.30912	7.35209	7.26333	9.16322	6.20302	1.81755	1.89116	1.7273	1.58134	1.49429		15	4.6194	0.68884
458	3.25458	4.24286	5.56538	6.65422	4.19187	8.52539	7.61277	7.70956	9.2491	6.63185	1.87566	1.95356	1.70911	1.64673	1.49994		15	4.82151	0.71558
458.5	3.25624	4.16361	5.70369	6.84938	4.16509	8.4474	7.75848	7.4869	9.43559	6.90719	1.88314	1.95373	1.76258	1.63605	1.53195		15	4.86273	0.72335
459	3.34093	4.45613	5.86552	7.09249	4.38424	8.43425	7.72818	7.47551	9.36967	6.71446	2.00683	2.14814	1.86123	1.7003	1.64176		15	4.94798	0.70718
459.5	3.46298	4.52398	6.03029	7.09687	4.33068	8.58824	7.4499	7.3452	9.2517	6.41285	2.03283	2.13389	1.83481	1.72762	1.64432		15	4.92441	0.69648
460	3.54474	4.76708	5.94244	7.16282	4.54339	8.68167	7.58915	7.4193	9.11146	6.68439	2.04318	2.11684	1.8644	1.75362	1.65958		15	4.99227	0.69824
460.5	3.6479	4.81876	6.23712	7.25804	4.56499	8.35912	7.90731	7.36273	8.72951	6.66603	2.07252	2.06746	1.86418	1.75632	1.6785		15	4.99937	0.68744
461	3.79719	5.21391	6.73537	8.11727	4.92106	8.87279	7.97794	7.04844	9.31762	7.2262	2.03649	2.12426	1.86517	1.7856	1.68488		15	5.24828	0.73409
461.5	3.87716	5.46987	6.94779	8.10179	5.29178	8.60139	7.66758	6.93982	9.05566	6.92397	2.13408	2.19366	1.86927	1.75805	1.71287		15	5.23632	0.70828
462	3.84647	5.43866	6.92333	7.92715	5.20399	8.75623	7.3835	7.03958	8.83013	6.79041	2.14282	2.1285	1.9013	1.79488	1.74566		15	5.19017	0.6969
462.5	3.82259	5.50603	6.87941	8.03281	4.96034	8.40911	7.58737	6.92789	8.69394	7.04011	2.11159	2.17029	1.84179	1.76539	1.74124		15	5.16599	0.69422
463	3.94958	5.55698	7.14642	8.09926	5.31742	8.32512	7.48465	6.98428	8.62397	6.79452	2.11285	2.12413	1.85215	1.80905	1.74395		15	5.19496	0.68999
463.5	3.99096	5.5535	7.32892	8.213	5.52002	8.54225	7.40511	6.92283	8.82232	6.56381	2.11238	2.17962	1.88935	1.81097	1.72572		15	5.23872	0.69841
464	3.99983	5.7573	7.41244	8.4869	5.53669	8.50025	7.18677	6.96132	8.79254	6.60084	2.20835	2.21063	1.91631	1.8127	1.76064		15	5.27623	0.69781
464.5	4.0351	5.76264	7.2464	8.59912	5.54212	8.50939	7.67671	6.95753	9.00361	6.62742	2.18314	2.28521	1.90165	1.81932	1.75063		15	5.32667	0.70971
465	3.93989	5.69001	7.49049	8.14032	5.77049	8.79966	7.31666	6.76161	8.86049	7.05594	2.16144	2.25021	1.91839	1.81685	1.80822		15	5.31871	0.70443
465.5	4.00773	5.91921	7.65106	8.48067	6.03714	8.3934	7.57734	6.86391	8.63582	6.64072	2.16149	2.28996	1.92485	1.87793	1.78911		15	5.35002	0.69921
466	4.09765	5.7429	7.47676	8.50961	5.71088	8.36397	7.45079	6.71028	8.33338	6.47551	2.27002	2.29492	1.97232	1.88098	1.81368		15	5.27358	0.67807
466.5	4.27641	6.18188	7.96581	8.96774	6.05431	8.34512	7.29817	6.6295	8.37213	6.59799	2.22739	2.28406	1.93587	1.85526	1.81204		15	5.38691	0.69994
467	4.17291	6.12406	8.06259	8.48858	6.19704	8.08885	7.00875	6.70179	8.69973	6.17802	2.26097	2.40704	2.01121	1.88725	1.82949		15	5.34122	0.68184
467.5	4.14982	6.22119	8.04326	8.59979	6.22445	8.10285	7.18097	6.09886	8.25705	6.5885	2.24679	2.30417	1.98512	1.90894	1.83002		15	5.31612	0.67858
468	4.1382	6.42539	8.34927	9.13009	6.42175	8.36597	7.21952	6.55232	8.63785	6.48849	2.24789	2.34332	1.96281	1.88606	1.83919		15	5.46721	0.71533
468.5	3.93967	5.94533	7.59394	8.06814	5.75584	6.72266	6.04891	5.78511	7.33266	5.25073	1.98052	1.87589	1.73094	1.57977	1.59999		15	4.74734	0.62023
469	3.74013	5.3353	6.90907	7.0432	5.33624	5.70274	4.8471	4.84746	6.02573	4.11583	1.69757	1.56341	1.5189	1.42834	1.45672		15	4.10452	0.53507
469.5	3.43343	4.78415	6.14114	6.05291	4.61614	4.86022	4.47546	4.58341	5.45179	3.68352	1.46048	1.35915	1.36878	1.26848	1.31926		15	3.65722	0.47238
470	3.19212	4.36005	5.60391	5.61295	4.08349	4.06571	3.79547	4.20405	4.99957	3.44584	1.29714	1.22557	1.24833	1.15226	1.21493		15	3.30009	0.4279
470.5	3.06718	4.15924	5.08267	4.95764	3.90287	3.56317	3.21729	3.41207	4.18274	2.68122	1.15917	1.05406	1.08924	1.09024	1.10097		15	2.91465	0.38009
471	2.81408	3.67359	4.56823	4.4265	3.4767	3.36062	2.90002	3.16284	3.88405	2.37012	1.05362	0.98593	1.067	1.00475	1.04123		15	2.65262	0.33907
471.5	2.86297	3.74695	4.53697	4.55823	3.55311	2.8318	2.46577	2.7401	3.21845	1.93908	1.05315	0.92642	0.99688	0.96297	0.98118		15	2.4916	0.33579
472	2.62463	3.30942	4.11418	4.02339	3.21031	2.3764	2.12978	2.52069	2.86598	1.76406	0.92606	0.94194	0.96641	0.95609	0.95026		15	2.24531	0.29276
472.5	2.53431	3.10384	3.81537	3.52017	2.88695	2.04614	2.07542	2.37177	2.41723	1.47069	0.95551	0.87992	0.9517	0.91507	0.91496		15	2.05727	0.26047
473	2.41872	2.98496	3.52255	3.48198	2.8238	2.14042	1.93082	2.16356	2.3143	1.56057	0.93108	0.88005	0.8845	0.89765	0.89896		15	1.98893	0.24639
473.5	2.28348	2.73886	3.255	3.01342	2.57307	1.97157	1.69643	2.0553	2.03903	1.44505	0.91157	0.83381	0.88497	0.86334	0.86557		15	1.8287	0.217
474	2.22678	2.57364	3.12223	3.04168	2.4815	1.84701	1.94463	2.31556	2.13763	1.46879	0.86413	0.81795	0.88973	0.86096	0.85732		15	1.82997	0.2124
474.5	2.15898	2.64181	3.11896	2.90658	2.51004	1.75216	1.78421	2.25628	2.03643	1.55424	0.84222	0.82796	0.8583	0.83386	0.84558		15	1.79517	0.2096
475	2.15497	2.40388	2.94613	2.91499	2.25452	1.80273	1.68663	2.1182	2.09137	1.28143	0.81162	0.82681	0.84922	0.84089	0.83364		15	1.72114	0.19893
475.5	1.97459	2.2097	2.56713	2.45502	2.15587	1.48789	1.30452	1.73396	1.65968	1.29725	0.81549	0.81744	0.86678	0.83574	0.82873		15	1.53399	0.163
476	1.92295	2.25063	2.57066	2.56791	2.07099	1.83644	1.63672	1.98789	1.91008	1.23333	0.8258	0.79813	0.85198	0.83633	0.82397		15	1.60825	0.16978
476.5	1.92605	2.10481	2.49621	2.5033	1.97764	1.52789	1.48209	1.94921	1.68281	1.21908	0.79222	0.82075	0.83784	0.84664	0.8245		15	1.53274	0.15973
477	1.86018	2.0389	2.33357	2.38048	1.96211	1.24105	1.15279	1.63673	1.47405	1.18174	0.82831	0.81319	0.85961	0.83341	0.81678		15	1.42753	0.14764
477.5	1.77375	1.91427	2.34817	2.34869	1.86257	1.31305	1.10912	1.50877	1.25748	0.89501	0.79441	0.79775	0.83262	0.8273	0.82094		15	1.36026	0.14618
478	1.77698	1.92325	2.29445	2.26557	1.81407	1.39247	1.18042	1.57437	1.6033	0.99565	0.78657	0.78414	0.83962	0.81727	0.81974		15	1.39119	0.14083
478.5	1.70233	1.77566	2.04276	1.96425	1.70241	1.22248	1.21384	1.30887	1.24071	1.10167	0.78939	0.81858	0.85212	0.8164	0.81038		15	1.29079	0.11474
479	1.78571	1.92641	2.16487	2.23428	1.78982	1.08592	1.03336	1.33815	1.05421	0.9697	0.81005	0.82418	0.83333	0.81565	0.80288		15	1.2979	0.13702
479.5	1.71735	1.73934	1.91538	1.88988	1.58002	0.9385	1.01554	1.31249	0.80064	0.98742	0.77794	0.8067	0.84181	0.82215	0.82502		15	1.19801	0.11454
480	1.62515	1.65653	1.97224	1.84816	1.59202	1.13706	1.07703	1.43268	1.19185	1.07825	0.75911	0.82405	0.85179	0.82956	0.81951		15	1.24633	0.10588
480.5	1.53924	1.7353	1.88445	1.8485	1.61766	1.28248	1.04941	1.42201	1.34538	0.9678	0.77491	0.79754	0.83547	0.83012	0.8104		15	1.24938	0.10571
481	1.59621	1.67974	1.73282	1.77329	1.4887	1.25962	1.24993	1.42997	1.29912	0.94533	0.77559	0.78464	0.83218	0.8059	0.80763		15	1.23071	0.09758
481.5	1.4532	1.4998	1.6493	1.7346	1.49223	0.89536	1.08884	1.2552	1.14847	0.87222	0.82187	0.83245	0.84698	0.80907	0.81954		15	1.14794	0.08742
482	1.44596	1.41836	1.54132	1.44269	1.43198	1.1602	1.12137	1.37575	1.02472	1.09344	0.77951	0.81056	0.80232	0.82689	0.80728		15	1.13882	0.07374
482.5	1.42081	1.35447	1.53399	1.44286	1.32803	1.07221	1.05498	1.34683	0.98193	0.95102	0.83636	0.77226	0.80885	0.83042	0.80966		15	1.10298	0.07051
483	1.36585	1.37752	1.39688	1.45346	1.40836	1.09506	1.18443	1.22393	1.04352	0.8276	0.80304	0.8428	0.81287	0.84449	0.81146		15	1.09942	0.06694
483.5	1.45543	1.49042	1.54318	1.43024	1.39788	1.23934	1.19467	1.3555	1.32051	1.12477	0.81994	0.82346	0.83664	0.82098	0.80756		15	1.17737	0.07282
484	1.38227	1.27562	1.49493	1.3685	1.29708	0.81223	1.03002	1.06	1.08833	0.96527	0.79687	0.79491	0.82587	0.81109	0.81693		15	1.05466	0.06466
484.5	1.3869	1.22289	1.42327	1.37926	1.23456	1.0665	0.84264	0.97578	0.99523	0.75797	0.82946	0.80369	0.83194	0.83251	0.81722		15	1.02665	0.0622
485	1.37537	1.31622	1.41001	1.38448	1.30517	1.12592	1.03582	1.09344	0.80179	0.90672	0.81612	0.80068	0.84761	0.82125	0.81732		15	1.05719	0.06313
485.5	1.36153	1.24974	1.43974	1.38532	1.31401	0.89079	0.99371	1.10248	0.91369	0.81779	0.81183	0.81943	0.85125	0.82734	0.81944		15	1.03987	0.06269
486	1.35001	1.23704	1.38981	1.26469	1.10395	1.08992	0.95093	1.03434	0.7963	0.81684	0.79515	0.82091	0.83117	0.83455	0.82203		15	1.00918	0.056
486.5	1.21298	1.22329	1.34575	1.14894	1.1301	0.75366	1.04762	0.97922	1.11609	0.78582	0.81523	0.84548	0.83672	0.82983	0.82288		15	0.99291	0.0498
487	1.2775	1.23259	1.30463	1.31685	1.17987	0.92936	0.86738	1.03597	1.04872	0.80734	0.81753	0.83559	0.84389	0.82493	0.81423		15	1.00909	0.05204
487.5	1.32587	1.25896	1.36855	1.34932	1.24744	0.95336	0.93177	0.98861	1.16004	0.8469	0.83741	0.81833	0.82417	0.82487	0.81628		15	1.03679	0.05702
488	1.25039	1.19871	1.34535	1.13716	1.26449	1.05535	1.00908	1.05874	0.99639	1.03458	0.80665	0.82881	0.85767	0.83258	0.83127		15	1.03382	0.046
488.5	1.22036	1.15026	1.2535	1.11293	1.18277	0.82908	0.81123	0.9803	0.97239	0.98837	0.74938	0.8339	0.84914	0.84316	0.8292		15	0.97373	0.04388
489	1.22154	1.16126	1.20571	1.15163	1.13338	1.05878	1.02334	1.00777	0.97962	0.87539	0.83427	0.81175	0.86374	0.84426	0.83201		15	1.0003	0.03855
489.5	1.23568	1.07756	1.27137	1.20799	1.18403	0.90622	0.77669	1.06235	1.01576	0.91938	0.83202	0.83479	0.84613	0.83278	0.83847		15	0.98941	0.04436
490	1.18666	1.19232	1.2789	1.23609	1.14665	1.02507	1.03091	0.91289	0.7376	0.79595	0.81089	0.82219	0.89036	0.85073	0.82696		15	0.98294	0.0475
490.5	1.23398	1.12778	1.24717	1.16021	1.17532	0.83594	0.88364	1.09832	0.99928	1.02255	0.83218	0.83869	0.87288	0.82448	0.83216		15	0.99897	0.04189
491	1.23472	1.22289	1.31256	1.23256	1.15561	0.98536	1.11335	1.0929	0.87928	0.81336	0.82773	0.86109	0.85912	0.85336	0.82504		15	1.01793	0.04721
491.5	1.23009	1.17307	1.24311	1.30204	1.27384	0.84937	1.13764	0.96024	0.88969	0.88425	0.85268	0.85553	0.86735	0.84777	0.83988		15	1.01377	0.04796
492	1.174	1.0647	1.18418	1.01989	1.10522	0.8088	0.95427	1.05711	0.80468	1.08521	0.86356	0.82265	0.85658	0.84233	0.83987		15	0.96554	0.03589
492.5	1.14667	1.12519	1.12693	1.01855	1.0917	0.86251	0.89968	1.01211	1.05913	1.07287	0.88558	0.82015	0.85136	0.84067	0.82944		15	0.97617	0.03188
493	1.07875	1.05176	1.08154	1.01687	0.98964	0.93479	0.97633	1.01319	0.78069	1.0292	0.84703	0.84459	0.86489	0.85021	0.83749		15	0.94646	0.02596
493.5	1.11869	1.04432	1.13399	1.04951	1.04535	1.05135	1.08483	1.03741	0.98627	0.99153	0.85294	0.85965	0.88612	0.84307	0.83674		15	0.98812	0.02703
494	1.09329	0.9514	1.08893	0.97985	0.96994	1.03821	0.75909	0.94885	0.85499	0.81937	0.83422	0.84747	0.84933	0.83478	0.8507		15	0.9147	0.02672
494.5	1.03043	1.01868	1.05734	0.99096	0.98939	1.05135	0.98769	0.90584	1.02964	0.98964	0.83061	0.8381	0.88018	0.84062	0.84502		15	0.95237	0.02204
495	1.05605	1.01359	1.11893	1.19234	1.06404	0.80137	1.13608	0.99855	0.86598	1.03901	0.84096	0.84166	0.86219	0.83489	0.84441		15	0.96734	0.03387
495.5	1.06242	0.98779	1.07187	0.86326	1.07301	1.10992	1.10199	1.02838	0.67717	0.82348	0.83892	0.85506	0.8647	0.83282	0.83092		15	0.93478	0.0345
496	1.08914	0.9015	1.0736	1.03184	1.03537	1.02364	0.80744	0.98536	0.74859	0.84659	0.83966	0.87297	0.85691	0.85001	0.85013		15	0.92085	0.02788
496.5	1.03243	1.0148	1.00162	1.02696	1.07427	1.18963	1.08506	0.87945	0.65635	0.82886	0.85226	0.84836	0.87988	0.84352	0.841		15	0.93696	0.03532
497	1.05334	1.03825	1.0638	0.85232	1.18151	1.18963	1.07926	1.0638	0.91716	0.82633	0.82449	0.8207	0.86429	0.85916	0.84118		15	0.96502	0.03482
497.5	1.05736	1.00396	1.06387	1.07003	1.02046	1.31305	0.98858	0.93222	0.83071	1.0811	0.84353	0.83606	0.87701	0.84049	0.84296		15	0.97343	0.03496
498	1.01702	0.94307	0.97769	0.9987	1.12985	1.28134	0.9868	0.99765	1.10771	0.81684	0.84782	0.82876	0.8624	0.85902	0.83436		15	0.96593	0.03427
498.5	1.00843	0.99207	1.04667	1.05119	0.96766	1.12821	1.10355	0.9203	1.15628	0.95482	0.84128	0.84556	0.87676	0.86902	0.85855		15	0.97469	0.02741
499	1.04116	1.00898	1.00495	0.92215	1.03941	1.07764	0.95182	0.98464	0.91022	0.7162	0.84844	0.86317	0.8772	0.86745	0.84978		15	0.93088	0.02506
499.5	0.9625	0.92632	1.0658	1.0808	1.04497	1.04164	1.02646	0.90945	0.95822	0.71746	0.86021	0.88086	0.89566	0.85031	0.84966		15	0.93802	0.02618
500	1.03505	0.94323	0.96836	0.90229	1.06846	0.99793	1.04495	1.04627	1.07214	0.90862	0.86345	0.82957	0.88073	0.86388	0.83699		15	0.95079	0.02269
500.5	1.03571	0.87101	0.98189	0.97699	1.07162	1.13792	0.83217	1.03018	0.85181	0.92792	0.87329	0.89469	0.85855	0.85976	0.85184		15	0.93702	0.02473
501	1.02776	0.97517	1.05287	0.95293	1.02071	0.93965	0.97454	1.01301	0.81365	0.96242	0.8735	0.87504	0.86798	0.86296	0.85266		15	0.93766	0.01935
501.5	1.03654	0.91193	1.02834	0.89842	1.01554	1.07764	0.82749	0.95138	1.00477	0.83203	0.85017	0.88022	0.89328	0.85359	0.85528		15	0.92778	0.02173
502	1.02383	0.98447	1.07414	1.13783	0.98762	0.95679	0.86515	1.04464	0.91716	0.89691	0.85451	0.8126	0.87739	0.86963	0.8541		15	0.94379	0.02461
502.5	1.01013	0.90101	1.09607	0.96286	0.98851	0.83508	1.08461	0.98663	0.93798	0.88361	0.8383	0.87738	0.88625	0.85219	0.85744		15	0.9332	0.02203
503	0.98049	0.885	1.02481	0.92366	1.00834	1.08021	1.0581	0.9803	1.05161	0.95039	0.83992	0.84433	0.87069	0.86633	0.85104		15	0.94768	0.02193
503.5	1.01764	0.93829	1.07027	0.91542	0.91234	0.8228	0.94313	1.00723	0.88796	1.03014	0.89609	0.8476	0.88322	0.853	0.84225		15	0.92449	0.0196
504	1.02261	0.92115	0.99302	0.92198	1.01326	1.15249	0.99482	0.98663	0.95301	0.83298	0.86586	0.87695	0.86632	0.86923	0.84978		15	0.94134	0.02243
504.5	1.01218	0.94347	1.06227	1.00879	0.99141	1.0165	0.86537	1.01753	0.89461	0.62948	0.86434	0.87784	0.88445	0.87316	0.85953		15	0.92006	0.0277
505	0.95953	0.86308	0.98322	0.78082	0.81609	1.09421	0.96897	0.97072	0.87292	0.83551	0.8736	0.87174	0.88423	0.86559	0.85448		15	0.89965	0.02075
505.5	0.97682	0.94743	0.97322	0.80505	0.92611	0.92765	0.98903	0.95355	0.86801	0.95514	0.88369	0.89668	0.88319	0.86801	0.85247		15	0.91374	0.01377
506
506.5
507
507.5
508
508.5
509
509.5
510
510.5
511	0.97191	0.94242	0.97682	0.8048	0.92533	1.13509	0.93813	1.0164	1.10746	1.06653	1.00873	0.90672	0.91724	0.96213	1.02414		15	0.98026	0.02165
511.5	1.08941	1.0876	0.9377	0.8234	0.87944	1.26902	1.07703	0.93747	1.11009	0.99587	1.10979	1.05817	0.91793	0.99671	1.00302		15	1.01951	0.02896
512	1.01634	0.99682	1.07131	0.69792	1.05388	1.15299	1.11341	1.12198	0.907	1.31312	1.07968	0.84023	1.00065	0.94884	1.03465		15	1.02325	0.03684
512.5	0.93824	1.15939	1.00461	0.73515	0.92599	1.08636	1.19498	1.09328	0.88761	1.07205	0.99012	1.08381	0.89595	1.04268	1.01993		15	1.00868	0.03054
513	0.8324	1.09494	1.04589	0.80184	0.84453	0.88944	1.09963	1.11726	1.05061	0.84852	0.97536	1.05025	0.95451	1.01308	1.08054		15	0.97992	0.02844
513.5	0.9023	1.02729	0.97049	0.73233	0.93299	1.05685	0.98856	1.08159	0.96188	1.06904	0.94774	1.02602	0.83938	0.96279	1.03695		15	0.96908	0.02402
514	0.93688	1.03301	0.92556	0.69917	1.06334	1.03033	1.05608	0.92927	0.87249	1.38028	1.04344	0.96994	0.90186	0.98584	0.9864		15	0.98759	0.03688
514.5	0.98301	1.10589	0.99012	0.63892	0.83919	1.11586	1.14483	1.01763	0.71114	0.90715	1.05015	1.02695	0.94261	1.0267	1.01122		15	0.96742	0.03691
515	0.97238	1.11487	1.00833	0.81902	0.91561	1.09	1.10624	1.09984	1.06211	1.052	1.05475	1.0835	0.89682	1.03594	1.01923		15	1.02204	0.02234
515.5	0.94799	1.07896	0.96924	0.76387	0.89264	1.06348	1.14813	0.96761	0.99901	1.0104	1.03251	0.96979	0.95086	0.98872	1.01488		15	0.98654	0.0225
516	1.00499	1.03886	0.98929	0.63741	0.80639	1.06547	1.19967	0.97765	0.78278	0.81494	1.1445	0.83806	0.98093	0.95205	1.03785		15	0.95139	0.03857
516.5	1.03924	1.12649	0.99364	0.76393	1.16683	1.10061	1.14813	1.05474	0.92442	1.5146	1.17787	1.06485	0.91254	1.06344	1.05907		15	1.07403	0.04229
517	0.9882	1.07111	1.00329	0.76751	1.0269	1.0668	1.13353	1.03998	1.03812	1.29758	1.1096	0.9687	0.9466	0.95689	0.99621		15	1.0274	0.0293
517.5	1.05913	1.10837	0.99248	0.68158	0.9093	1.18316	1.20463	0.97847	0.79954	1.0109	1.1351	0.97212	0.98649	1.02362	1.04771		15	1.00617	0.03536
518	0.90878	1.09744	0.99771	0.79697	0.90201	0.93022	1.1677	1.06253	1.05291	1.06102	1.08735	0.98718	0.91289	1.00103	0.983		15	0.99658	0.02465
518.5	0.87015	0.99422	1.00686	0.75921	0.86795	0.98028	0.92848	0.97335	1.01117	0.98384	0.96002	1.01996	1.02038	0.96724	0.99205		15	0.95568	0.01865
519	0.89689	1.08107	0.98435	0.74726	0.88267	0.98889	1.0649	0.99487	0.99737	0.96429	1.00489	1.05724	0.95382	0.95716	1.04105		15	0.97445	0.02181
519.5	0.98551	1.01809	1.06016	0.76041	0.9673	1.06813	1.03183	1.07585	0.95334	1.17479	1.10289	0.96435	1.02446	1.02749	0.99981		15	1.01429	0.02359
520	0.84746	0.98661	0.98864	0.81312	0.80208	0.96271	0.97478	0.95592	1.03812	0.87708	0.93221	0.95845	1.00135	1.04812	0.96708		15	0.94358	0.01954
520.5	0.8322	1.1449	0.99711	0.77658	0.93653	0.90171	1.11396	0.93481	0.98817	1.12217	0.9627	1.13584	1.03941	1.025	0.9909		15	0.99347	0.02816
521	0.87914	1.10032	0.96024	0.77714	0.97908	1.0184	1.2592	0.94813	0.96812	1.15825	0.93988	0.90144	0.95234	1.04615	1.0399		15	0.99518	0.03021
521.5	7.19544	6.51104	5.39225	6.06559	6.71439	13.45	12.0474	9.77081	11.5744	12.7287	1.14086	0.93468	0.9937	1.01675	0.94005		15	6.43174	1.20946
522	8.00289	6.48534	5.3298	6.57443	6.48144	15.1484	11.9203	9.61193	12.5012	12.2235	1.05744	1.01033	1.02768	1.10771	0.97934		15	6.63078	1.26353
522.5	7.07903	5.44908	4.66699	5.63286	5.52005	13.2143	9.89693	8.39422	10.6533	10.302	1.14373	0.96124	0.91975	1.07241	0.97814		15	5.7256	1.06879
523	6.71784	5.35853	4.35199	5.27301	5.17077	12.431	9.3868	7.56786	9.73217	9.49655	1.20472	1.29025	1.11613	1.27385	1.08499		15	5.43043	0.96844
523.5	6.48377	5.68291	4.30459	5.52128	4.80222	11.3181	9.03597	7.06909	9.12093	8.25861	1.84946	2.28986	1.52009	2.38162	1.58583		15	5.41495	0.80729
524	7.53375	7.89471	5.34238	7.20752	5.99519	10.4601	8.39548	6.93153	8.3375	8.36086	4.80736	7.35394	3.73324	6.53755	3.86952		15	6.85071	0.47677
524.5	10.4706	9.87984	7.05666	8.21036	7.74118	10.0689	7.85421	6.44444	7.39796	7.83661	11.0722	11.8655	7.64887	9.48275	7.88574		15	8.72772	0.41702
525	11.4853	9.93397	7.48098	8.29414	7.91409	9.04658	7.97024	5.83251	7.5764	6.91893	14.1241	11.8577	9.10944	9.47188	9.14926		15	9.0777	0.54805
525.5	11.4038	9.73628	7.37385	7.89266	7.79102	8.85496	7.67893	5.76138	7.09793	6.83674	14.1526	11.7536	8.96633	9.14739	8.9853		15	8.89552	0.56145
526	11.0533	9.10844	7.04772	7.87209	7.26714	8.78435	7.06821	5.40098	7.09267	6.13457	13.5223	11.1087	8.67446	9.11151	8.63972		15	8.52574	0.54627
526.5	10.4999	8.71574	6.90743	7.4527	7.39902	8.25659	6.72289	5.33538	6.65297	6.59717	12.9431	10.6686	8.45949	8.71243	8.44087		15	8.25095	0.50105
527	10.2334	8.67031	6.77663	7.33164	7.12941	7.96486	6.84718	5.3155	6.66612	6.35359	12.7019	10.4534	8.21775	8.45716	8.14524		15	8.08427	0.48532
527.5	9.82189	8.11004	6.50306	6.93886	6.74859	8.19128	6.59887	5.11029	6.36116	5.8534	11.6525	9.5812	7.87583	7.97656	7.88379		15	7.68049	0.43778
528	9.3631	8.0869	6.0406	6.74019	6.52351	8.06763	6.81356	4.93768	6.46139	5.97519	10.8586	9.32023	7.12352	7.47899	7.31184		15	7.40686	0.39569
528.5	8.67851	7.3847	5.61011	6.18294	6.27106	7.3572	6.44591	4.81017	5.98258	6.07092	10.1998	8.2835	6.39006	6.84331	6.71121		15	6.88147	0.34764
529	8.44254	7.21688	5.4635	6.02918	6.13346	7.86905	6.57489	4.81386	6.23398	6.32653	9.21603	7.81887	6.09315	6.28438	6.1804		15	6.71311	0.30309
529.5	8.00725	6.70964	5.0317	5.80701	5.72533	7.91878	6.46107	4.76835	6.28492	5.95113	8.29571	6.91821	5.27506	5.7891	5.73952		15	6.31219	0.27918
530	7.67046	6.52343	4.92992	5.50831	5.66895	7.6675	6.62395	4.78044	6.07723	6.26488	7.87343	6.38291	5.05939	5.39939	5.31301		15	6.11621	0.26246
530.5	7.35883	6.18986	4.68306	5.5417	5.40581	7.5392	6.44426	4.68286	6.41604	6.10951	7.37846	5.89546	4.66325	5.12736	4.94211		15	5.89185	0.25884
531	7.38861	6.21139	4.52695	5.18457	5.22367	8.10542	6.62698	4.57954	6.05554	5.95214	6.8718	5.75581	4.45436	4.7736	4.73521		15	5.76304	0.29056
531.5	7.26317	5.90586	4.42519	5.24892	5.25943	8.03846	6.39603	4.71464	6.29675	6.26287	6.68789	5.37569	4.11574	4.66109	4.49598		15	5.67651	0.29453
532	7.15113	5.80938	4.36531	5.14194	5.18762	8.27482	6.39383	4.67343	6.29642	6.27941	6.22744	5.18493	4.03719	4.44747	4.33582		15	5.58708	0.30765
532.5	6.8136	5.69552	4.35384	5.04556	5.24239	7.79977	6.14855	4.76302	6.15971	6.48941	6.02742	5.20249	3.92466	4.39141	4.23538		15	5.48618	0.28192
533	6.96029	5.743	4.32052	4.86277	5.07716	8.13592	6.38363	4.74477	5.95136	6.17567	5.98466	5.06237	3.87627	4.23418	4.21866		15	5.44875	0.3039
533.5	6.86509	5.73166	4.467	4.99939	5.06474	8.13691	6.5556	4.88376	6.28524	6.26939	5.79327	4.86773	4.03024	4.17354	4.1001		15	5.48158	0.30426
534	6.98569	5.6335	4.40743	5.02692	5.15955	8.22642	6.5421	4.87741	6.22741	6.47438	5.94496	4.68489	3.91745	4.28644	4.08473		15	5.49862	0.31613
534.5	7.05494	5.58206	4.38453	5.0896	5.21987	8.12962	6.43379	4.82657	6.44561	6.51598	6.18027	4.69033	3.92249	4.19358	4.16376		15	5.5222	0.31754
535	6.84385	5.78479	4.3802	4.92271	5.30831	7.91513	6.71545	4.91349	6.06868	6.70643	5.97258	4.81414	3.82691	4.23673	4.15019		15	5.50397	0.30748
535.5	7.10788	5.66233	4.39229	5.00506	5.47686	8.36897	6.47706	4.97191	6.32304	7.00113	6.04679	4.80761	3.79267	4.14708	4.19259		15	5.58489	0.33526
536	7.07663	5.77148	4.39047	5.00288	5.41234	8.3567	6.59391	4.87146	6.20506	6.89538	5.99655	4.90905	3.88947	4.2607	4.16931		15	5.58676	0.32824
536.5	7.20707	5.76196	4.42964	4.99315	5.56363	8.40875	6.54458	4.92661	6.11206	7.12993	6.20539	4.93934	3.91267	4.33424	4.23733		15	5.64709	0.33282
537	6.89001	5.87659	4.42314	5.02168	5.28212	7.99901	6.69726	4.90508	6.2767	6.58414	5.98101	5.01592	3.92119	4.22665	4.22011		15	5.55471	0.30468
537.5	7.10283	5.63661	4.67541	5.07732	5.46807	8.18896	6.40044	5.37167	6.2997	6.92294	6.2167	4.83278	3.95916	4.31493	4.25319		15	5.64805	0.30963
538	7.04752	6.06263	4.55986	5.03247	5.24408	8.03978	6.93482	5.08938	6.12553	6.39719	6.25525	5.15045	4.01034	4.3994	4.33097		15	5.64531	0.30021
538.5	6.88961	5.87325	4.42426	5.05807	5.15877	7.55942	6.62643	4.79377	6.14295	6.14209	6.41979	5.08008	4.03476	4.4332	4.41545		15	5.53679	0.27462
539	7.01844	5.84648	4.54061	4.97259	5.23528	7.96188	6.2563	4.97232	6.03713	6.2724	6.275	5.39666	4.08889	4.36804	4.43817		15	5.57868	0.27953
539.5	6.86477	5.71891	4.54324	5.07054	5.31684	7.8001	6.06532	4.90303	6.02728	6.41724	6.12945	5.3325	4.16344	4.5738	4.45644		15	5.55886	0.26036
540	6.76393	5.77744	4.53411	5.20138	5.34008	7.22791	6.15985	4.73001	6.37299	6.33254	6.49995	5.35503	4.3182	4.48978	4.58762		15	5.57939	0.24268
540.5	6.80938	6.0109	4.52777	5.00273	5.41934	7.3403	6.47237	4.81283	5.884	6.45683	6.47847	5.50944	4.2227	4.58146	4.62185		15	5.61003	0.24942
541	6.73626	5.78435	4.61211	5.09558	5.25068	7.33499	6.31611	4.87351	6.04469	6.11001	6.33752	5.21258	4.33071	4.60647	4.63136		15	5.5518	0.23281
541.5	6.63248	6.02151	4.49644	4.80055	5.35359	7.10559	6.68155	4.76548	5.51364	6.26137	6.35938	5.32148	4.20741	4.54747	4.68581		15	5.51692	0.24076
542	6.67384	5.95392	4.57453	4.95933	5.47645	7.29587	6.69037	4.8975	5.95104	6.52901	6.2518	5.17748	4.23157	4.42763	4.66389		15	5.58361	0.24903
542.5	6.39837	6.02928	4.47885	4.87075	5.32143	7.02205	6.76946	4.98401	5.83832	6.22378	5.97469	5.24909	3.95369	4.36319	4.65908		15	5.47574	0.23965
543	6.70982	6.08122	4.43478	4.99864	5.35019	7.52395	6.66474	5.02091	6.08741	6.40772	6.09569	5.45771	3.82865	4.36987	4.53266		15	5.57093	0.27035
543.5	6.69415	5.88468	4.50992	5.23594	5.09998	7.70893	6.44206	5.22202	6.48899	5.8534	5.87937	5.2873	3.77782	4.44289	4.58656		15	5.54093	0.26559
544	6.71229	5.99918	4.40538	5.19839	5.29298	7.64396	6.51013	5.04387	6.34965	6.26037	5.98063	5.44823	3.74688	4.50713	4.56559		15	5.57765	0.26949
544.5	6.8596	6.03359	4.60641	4.95989	5.43676	7.98575	6.73584	5.50328	6.09924	6.5696	5.93345	5.29134	3.68953	4.28055	4.54392		15	5.63525	0.29336
545	6.89768	5.75899	4.54015	5.21643	5.14866	7.88662	6.3106	5.32411	6.70785	6.00125	6.10874	5.16738	3.73619	4.185	4.53607		15	5.56838	0.28802
545.5	6.94224	6.0462	4.66659	5.1688	5.3201	8.05801	6.59501	5.43891	6.79067	6.31901	6.02646	5.4574	3.87427	4.00694	4.56119		15	5.68479	0.29935
546	7.2047	6.15281	4.60115	4.95259	5.30601	8.46577	6.86647	5.22202	6.18534	6.25385	6.14364	5.39915	3.96029	4.17983	4.59818		15	5.69945	0.31631
546.5	7.08759	5.97822	4.54326	5.09006	5.21953	8.29272	6.58922	5.28393	6.39238	6.07794	6.08246	5.32722	3.7826	4.24774	4.60113		15	5.63973	0.30454
547	7.1285	6.03733	4.66901	5.24232	5.30377	8.1515	6.49773	5.45982	6.61091	6.15512	6.30549	5.53693	3.85819	4.33372	4.69242		15	5.73218	0.29258
547.5	7.72349	5.93318	4.75866	5.32943	5.17551	9.0542	6.45611	5.60619	6.7095	5.92758	6.59277	5.37025	3.89112	4.40936	4.66344		15	5.84005	0.34485
548	7.26746	6.23118	5.04025	5.33207	5.2365	8.39184	6.95191	5.90488	6.57509	6.07493	6.34308	5.47045	4.15562	4.54904	4.63806		15	5.87749	0.29372
548.5	7.29759	6.11599	5.02036	5.63034	5.28652	8.45516	6.7397	5.6351	7.23299	6.28994	6.34001	5.45227	4.38563	4.48768	4.5231		15	5.92616	0.30098
549	7.20351	6.07755	5.06839	5.64078	5.2335	8.09978	6.69919	5.63592	7.39238	6.05438	6.50724	5.41592	4.48086	4.34918	4.65263		15	5.90075	0.28711
549.5	7.31255	5.83448	4.88855	5.82954	5.45181	8.45152	6.33623	5.55412	7.75616	6.47939	6.37357	5.29274	4.20298	4.36293	4.66424		15	5.91939	0.31763
550	6.97838	6.1215	4.99019	5.94378	5.31423	7.93469	6.89955	5.64801	7.78804	6.15562	6.22207	5.30346	4.31238	4.55952	4.71284		15	5.92562	0.2878
550.5	7.03235	5.78691	4.91772	6.10159	5.36658	8.20487	6.37095	5.4836	8.18173	6.1907	6.05983	5.16287	4.33184	4.48146	4.78245		15	5.89703	0.30762
551	7.068	6.08934	4.93605	6.14305	5.32531	8.53506	6.5884	5.62157	8.1814	6.1887	5.80094	5.55029	4.23053	4.56469	4.70193		15	5.96835	0.32049
551.5	6.99528	5.85138	4.90242	6.05364	5.05609	8.1336	6.18906	5.53998	8.04798	5.68049	6.05696	5.47371	4.24486	4.51931	4.6717		15	5.82776	0.30142
552	6.88003	5.87796	4.96693	6.05802	5.06879	7.85248	6.6843	5.70418	8.15018	5.83987	6.10758	5.03161	4.20967	4.42586	4.53772		15	5.82635	0.30614
552.5	6.91508	6.07888	5.03779	6.12413	5.09656	7.66982	6.83092	5.93993	8.25994	5.86643	6.36034	5.28683	4.11565	4.44832	4.5667		15	5.90649	0.30651
553	6.87921	6.14228	5.18928	6.10143	5.2308	7.57335	7.03927	6.28495	8.14459	6.12004	6.38508	5.20528	4.0736	4.51826	4.58156		15	5.9646	0.30065
553.5	7.07964	6.26126	5.11238	5.86657	5.44006	7.74407	6.96624	6.26281	7.58758	6.55507	6.61521	5.51627	3.94196	4.60556	4.56504		15	6.00798	0.29339
554	6.9865	6.14598	5.03986	6.36123	5.47403	7.54053	6.70167	6.0943	8.53204	6.50044	6.63247	5.55029	3.96542	4.65042	4.68761		15	6.05752	0.30934
554.5	7.32573	6.05591	5.19409	6.45105	5.27438	8.13691	6.51812	6.32308	8.80776	5.82884	6.71455	5.55371	4.0451	4.55435	4.95992		15	6.11623	0.33447
555	7.26906	6.08641	5.19009	6.29703	5.28166	8.04774	6.54788	6.22489	8.465	5.78123	6.69038	5.58493	4.13529	4.58905	5.02208		15	6.08085	0.3126
555.5	7.51839	6.34983	5.03705	6.09577	5.18901	8.30764	7.01337	5.84338	8.02366	5.66997	6.92914	5.64629	4.21071	4.62789	4.94806		15	6.09401	0.32108
556	7.78287	6.50161	4.92726	6.11051	5.04269	8.95972	7.23164	5.64371	8.11568	5.3036	6.80602	5.73157	4.19082	4.56535	5.02178		15	6.12899	0.36276
556.5	8.03882	6.61092	5.17343	6.22976	5.47791	9.63865	7.28731	5.82411	8.14919	6.16113	6.63899	5.89452	4.50276	4.77032	5.0347		15	6.36217	0.36677
557	8.00034	6.05487	5.14027	6.30725	5.23072	9.42152	6.31969	5.7458	8.30628	5.75868	6.77917	5.75006	4.51475	4.76823	4.94276		15	6.20269	0.36237
557.5	7.83762	5.87199	5.09187	6.14838	5.47115	9.21631	6.04354	5.8565	7.94545	6.28844	6.65893	5.66043	4.30725	4.81132	4.89386		15	6.1402	0.34164
558	7.88031	5.81331	5.06492	6.16444	5.14358	9.2478	5.96362	5.78659	7.95531	5.64992	6.71282	5.62299	4.32324	4.83358	4.87724		15	6.06931	0.35022
558.5	7.85005	5.87707	5.04525	6.27253	5.37675	8.93453	5.97713	5.76507	8.0838	6.17466	6.96558	5.73701	4.30543	4.92127	4.81884		15	6.14033	0.33798
559	7.64309	5.88391	5.07728	6.18452	5.00862	8.85198	6.21745	5.9182	7.93723	5.38729	6.63419	5.51037	4.21636	4.8918	4.86994		15	6.01548	0.33254
559.5	7.6397	5.69342	5.07352	6.2023	5.20558	8.88414	5.93138	5.90529	7.95728	5.84889	6.59526	5.41546	4.22175	4.90732	4.80227		15	6.0189	0.3308
560	7.57418	5.86339	5.14943	6.27635	5.26817	8.76115	6.15296	5.80094	8.18271	6.10299	6.58721	5.53383	4.47791	4.82998	4.67335		15	6.0823	0.32514
560.5	7.38503	5.75811	5.05721	6.2161	5.27465	8.58478	5.77401	5.69455	8.01775	5.99674	6.38527	5.70221	4.39988	4.87445	4.79256		15	5.99422	0.3075
561	7.47211	5.48955	5.12046	6.09109	5.43088	8.70313	5.46865	5.77655	8.00526	6.42376	6.44108	5.47045	4.44437	4.63692	4.678		15	5.97682	0.32268
561.5	7.17761	5.86149	4.99132	6.19172	5.3078	8.1452	6.21937	5.76097	8.35557	6.12304	6.41001	5.46361	4.20168	4.48788	4.73256		15	5.96199	0.3145
562	7.33618	5.89147	5.01791	6.34679	5.33341	8.42035	6.37316	5.90652	8.49852	6.16815	6.45201	5.36979	4.10931	4.65506	4.73866		15	6.04115	0.33205
562.5	7.12892	6.04436	4.93425	5.91265	5.28698	8.24996	6.7058	5.92497	7.70523	6.11953	6.20788	5.34291	3.92353	4.58008	4.69442		15	5.91743	0.30723
563	7.03248	5.80774	4.74218	5.75703	5.27456	8.05172	6.11575	5.6968	7.3628	6.07292	6.21325	5.45973	3.76756	4.61125	4.71619		15	5.7788	0.2896
563.5	6.87493	6.06259	4.97324	5.83251	5.56607	7.65357	6.54871	6.3606	7.49688	6.79564	6.29629	5.53647	3.56589	4.62815	4.5765		15	5.91787	0.29369
564	6.93504	6.00169	4.94365	6.05008	5.13168	7.66716	6.59033	6.25605	7.86888	5.91354	6.40291	5.37305	3.61124	4.69128	4.58982		15	5.86843	0.30193
564.5	7.26323	6.14625	5.05449	6.08442	4.91365	8.56191	6.69864	6.52501	7.8094	5.60231	6.16454	5.55386	3.56397	4.81944	4.465		15	5.94841	0.34036
565	7.3162	5.81402	4.80897	6.02953	5.2089	8.48798	6.30867	6.23042	7.76602	6.15762	6.34442	5.27938	3.36751	4.75303	4.50018		15	5.89152	0.3415
565.5	7.01329	6.14174	4.76857	6.01369	5.08063	8.10807	6.85986	6.16892	7.87874	5.90402	6.11852	5.38361	3.34822	4.60863	4.49723		15	5.85958	0.33441
566	7.17473	6.22092	4.86516	5.84953	5.23038	8.61926	7.06297	6.45777	7.67401	5.98722	5.93019	5.33887	3.25255	4.48506	4.71354		15	5.92414	0.35314
566.5	7.3194	6.06271	4.90545	5.8711	5.27296	8.78568	6.61513	6.33067	7.72034	6.05187	6.05312	5.47029	3.46023	4.48185	4.73406		15	5.94232	0.34702
567	7.1402	6.17272	5.17334	6.0576	5.46576	8.58147	6.80254	6.49672	8.00723	6.44831	5.89894	5.50291	3.82995	4.56797	4.7232		15	6.05792	0.32866
567.5	7.10622	6.18741	5.49453	5.90459	5.42071	8.36566	6.97699	6.91205	7.71804	6.34607	6.04679	5.35783	4.057	4.55114	4.73536		15	6.07869	0.30944
568	7.12971	6.0482	5.23641	6.0079	5.44754	8.49528	6.56607	6.43665	7.75813	6.34707	5.96414	5.49033	4.01616	4.71767	4.78801		15	6.02995	0.30404
568.5	6.91775	6.19784	5.2049	5.75967	5.54143	8.23073	6.74108	6.42107	7.50345	6.66633	5.80478	5.6146	3.96872	4.47589	4.65653		15	5.98032	0.2978
569	7.19003	6.12582	5.33687	5.9371	5.70094	8.47074	6.79013	6.49959	7.86165	7.02518	6.10931	5.42151	4.15415	4.47255	4.61669		15	6.11415	0.31822
569.5	6.81036	6.16811	5.22945	6.15247	5.40538	7.87403	6.80667	6.06396	8.33815	6.42476	5.94669	5.48955	4.37494	4.42678	4.626		15	6.00915	0.29869
570	6.67346	6.08528	5.28917	6.00175	5.52376	7.49975	6.4167	5.89422	7.86625	6.73199	6.04718	5.71386	4.66412	4.59724	4.55553		15	5.97068	0.25407
570.5	7.15343	6.18143	5.29184	6.12204	5.26334	8.29935	6.66446	5.99323	8.10056	6.32001	6.2075	5.65841	4.57045	4.60353	4.44668		15	6.05842	0.30222
571	7.18591	6.38574	5.11407	5.88917	5.3445	8.27515	6.98856	5.87351	7.84785	6.3596	6.29667	5.74291	4.33462	4.3905	4.5694		15	6.03988	0.30889
571.5	7.3615	6.20208	5.13712	5.70828	5.14968	8.47041	6.85876	5.89442	7.62274	5.99624	6.45258	5.5054	4.35982	4.25383	4.54312		15	5.96773	0.31794
572	7.36712	6.37047	5.07777	5.78376	4.84641	8.28278	7.10762	5.78311	7.69405	5.35823	6.65145	5.59332	4.35244	4.33346	4.5746		15	5.94511	0.32418
572.5	7.33028	6.2899	5.18582	5.79716	4.98604	8.46743	7.00317	5.98913	7.73546	5.77221	6.39313	5.53662	4.36251	4.31886	4.43987		15	5.97384	0.324
573	7.59349	6.28907	5.1516	5.60967	4.91071	9.14305	6.97837	5.8729	7.23201	5.55018	6.24394	5.55977	4.41031	4.44734	4.51124		15	5.96691	0.34257
573.5	7.50144	6.36242	5.06322	5.66561	5.04188	9.05387	7.20243	5.87392	7.39928	5.78424	6.14901	5.48241	4.23252	4.39194	4.53952		15	5.98291	0.34651
574	7.20759	5.90042	5.10136	5.71898	5.10429	8.8248	6.44619	5.95305	7.54289	5.92407	5.79039	5.31464	4.22966	4.35507	4.5245		15	5.86253	0.32346
574.5	7.37454	5.96298	5.13252	5.49873	5.37595	8.79297	6.71407	6.03485	7.1699	6.45784	6.1561	5.17188	4.21019	4.28755	4.53406		15	5.92494	0.32429
575	7.20898	5.96172	5.17993	5.59217	5.19437	8.49925	6.76313	6.16277	7.29149	6.20173	6.11871	5.12031	4.17709	4.35284	4.42701		15	5.88343	0.31327
575.5	7.06556	5.83817	5.22849	5.66207	5.34874	8.04442	6.38694	6.21115	7.41538	6.55607	6.2867	5.2494	4.22583	4.36876	4.38142		15	5.88461	0.2916
576	7.02893	5.90274	5.18795	5.41588	4.98055	8.30466	6.59391	6.0861	7.06145	5.99875	5.95321	5.17157	4.2698	4.23032	4.20234		15	5.75921	0.30144
576.5	7.13887	6.1361	5.49814	5.30711	5.1192	8.36997	6.67135	6.46597	6.95399	6.28192	6.10778	5.56085	4.51032	4.12023	4.19649		15	5.89589	0.30194
577	7.17381	6.29528	5.27769	5.13828	5.09496	8.37195	6.69285	6.09041	6.80217	6.11452	6.17566	5.85771	4.44498	3.93438	4.3154		15	5.852	0.30523
577.5	7.4148	6.20493	5.40678	5.24614	5.39295	9.03497	6.64793	6.21894	6.89813	6.61271	5.99463	5.72194	4.57462	4.05416	4.4132		15	5.98912	0.32809
578	7.6284	6.1225	5.22529	5.17962	5.39661	9.37146	6.76671	5.92148	6.7233	6.54204	6.08534	5.43829	4.5091	4.09594	4.49117		15	5.96648	0.34855
578.5	7.56286	6.10945	5.46016	4.89491	5.38179	9.22791	6.88025	6.23411	6.2113	6.60469	6.0978	5.29864	4.6662	4.03851	4.39888		15	5.93783	0.34256

## Sheet: Figure 8-figure supplement 1C
Data related to Figure S6C: GCaMP7f DF/F upon 400 APs, application of KCl or application of ionomycin
DF/F(GCaMP7f) (A.U.)	bouton #1	#2	#3	#4	#5	#6	#7	#8	#9	#10	#11	#12	#13	#14	#15	#16	#17	#18	#19	#20	#21	#22	#23	#24	#25	#26	#27	#28	#29	#30	#31	#32	#33	#34	#35		N	Average	SEM
400APs	6.60444	6.16074	5.61357	9.13748	8.25465	5.88763	3.24355	9.75878	3.96029	3.99448	3.27383	3.69556	3.35463	6.26229	2.19203	2.47696	3.1627	6.10125	3.78757	6.06677	4.77041	7.38105	9.52953	11.2606	7.79243	6.49587	5.2433	7.12474	9.2373	3.9393	2.59614	1.93769	2.1113	1.66591	2.39405		35	5.32768	0.43755
KCl																					15.1484	11.9203	9.77081	12.5012	12.7287	14.1241	11.8577	9.10944	9.47188	9.14926							10	11.5782	0.67738
ionomycin	21.9757	18.9093	19.0715	22.1129	18.8831	8.9116	19.5325	19.784	12.7271	11.7529	16.9961	16.5028	15.0846	12.8079	9.99559	12.126	12.6975	19.6192	15.5452	19.0494																	20	16.2042	0.89013
Results from Tukey-Kramer test
DF/F(GCaMP7f)
p_two_tail	400APs	KCl	ionomycin
400APs		9e-07	0
KCl			0.0006091
ionomycin
DF/F(GCaMP7f) (A.U.)	site of axon #1	#2	#3	#4	#5	#6	#7	#8	#9	#10	#11	#12	#13	#14	#15	#16	#17	#18	#19	#20	#21	#22	#23	#24	#25	#26	#27	#28	#29	#30	#31	#32	#33	#34	#35	#36	#37	#38	#39	#40	#41		N	Average	SEM
400APs	3.54028	2.66567	6.66907	1.69613	2.09967	1.59664	2.37459	2.65814	1.22525	1.23555	1.18248	1.23509	1.14821	1.09454	1.1591	1.09414	1.05391	1.36412	1.0933	1.0672	1.58996	1.11155	1.05224	3.5356	1.68758	1.10693	2.41089	0.94272	0.9928	1.06072	1.35572	0.88702	0.9421	1.0827	0.56366	1.59103	1.39401	1.12617	1.03117	3.03093	1.14285		41	1.6315	0.16819
KCl																											7.5185	17.9595	12.0338	14.4901	9.9843	12.41	10.8697	10.7162	17.6683	8.782	11.831	3.96744	1.12894	13.0793	18.3723		15	11.3874	1.25417
ionomycin	13.7075	15.7709	19.6236	4.51558	7.29198	22.4852	8.52679	8.81628	18.3599	21.598	18.1104	20.0207	20.2145	19.0857	11.6488	10.0642	16.2745	15.6648	15.7798	15.5049	8.6822	11.6115	14.7218	21.4796	15.4198	18.6754																	26	15.1405	0.96706
Results from Tukey-Kramer test
DF/F(GCaMP7f)
p_two_tail	400APs	KCl	ionomycin
400APs		0	0
KCl			0.004379
ionomycin
